# Supplementary material
Source: PubMed Central journal article supplement (PMC1794290)
Supplement: pnas_0610772104_1.pdf [file pnas_0610772104_1.pdf]

1. Determination of initial component list

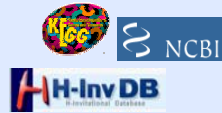

2. Manual curation of network components

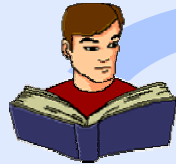

1500+ citations

5x

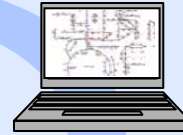

280+ metabolic functions

3. Functional testing and validation

4. Dissemination of network content

BiGG Human Database

- Browse and search tools
- Human-specific network maps
- Stoichiometric matrix
- Reaction, metabolite & gap lists

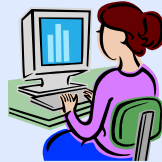

5. Possible research applications

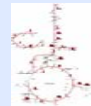

Visualizing genome-scale data (e.g., transcriptomic, proteomic, fluxomic)

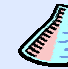

Identifying and investigating knowledge gaps

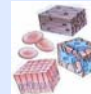

Modeling specific cell types and diseases

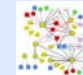

Analyzing network structure
