# Supplementary material
Source: PubMed Central journal article supplement (PMC1794290)

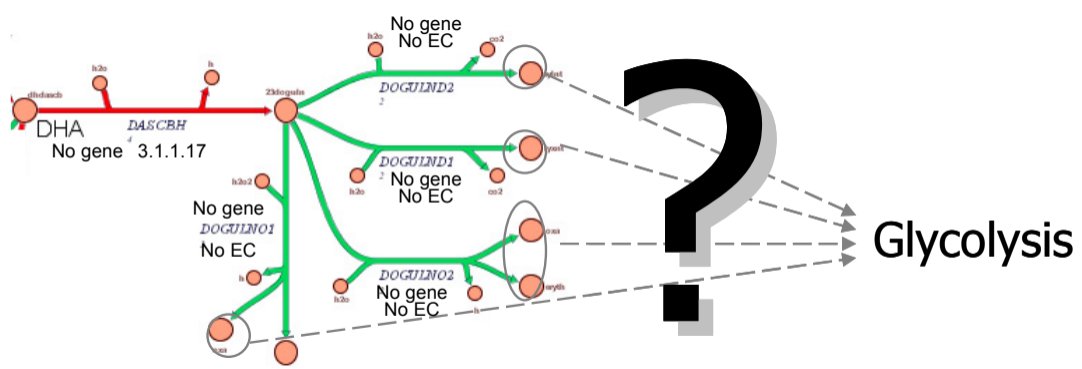

Supplement: pnas_0610772104_4.pdf [file pnas_0610772104_4.pdf]
