# Supplementary material
Source: PubMed Central journal article supplement (PMC1794290)

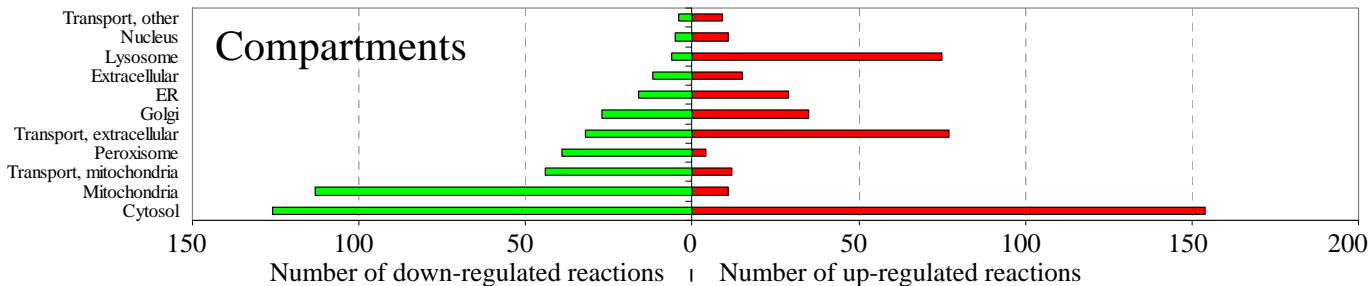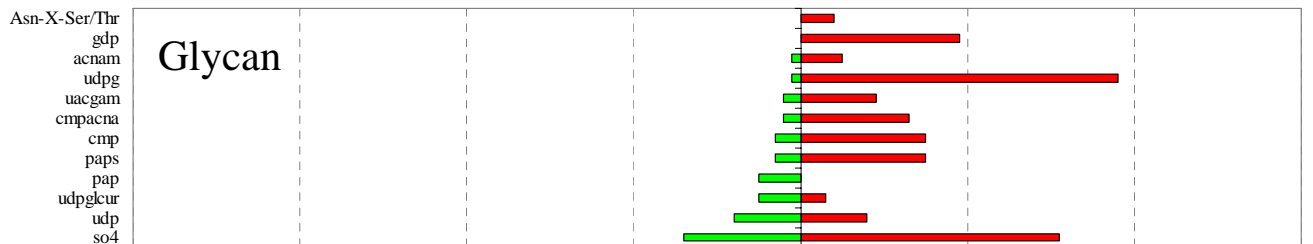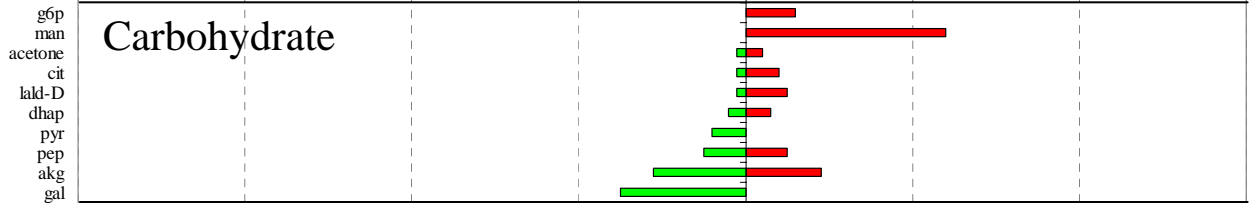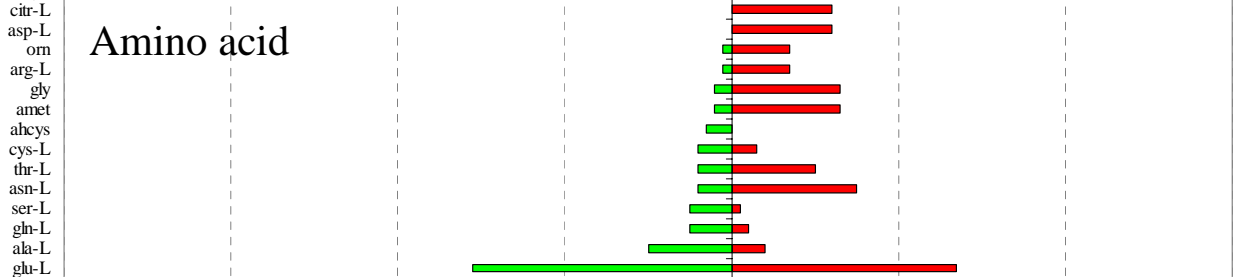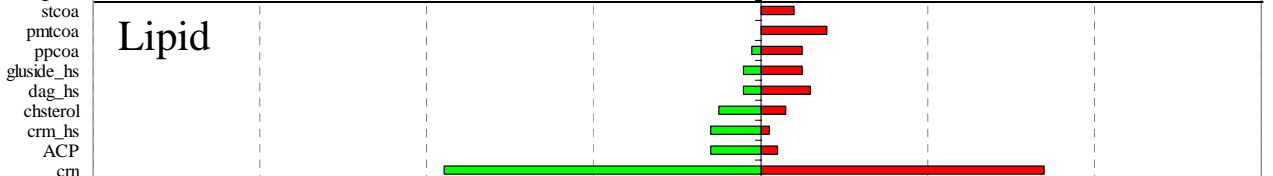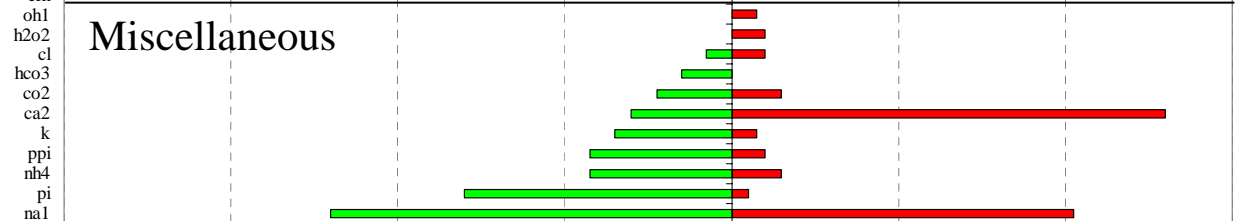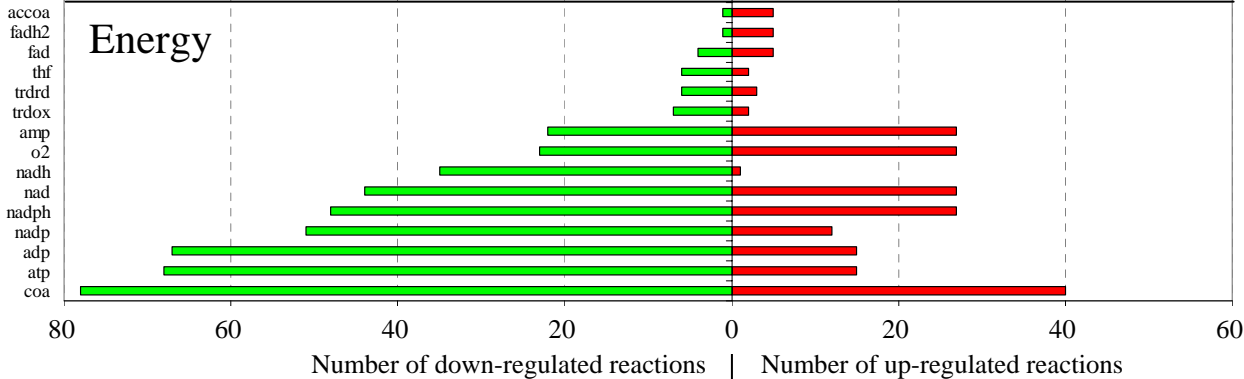

Supplement: pnas_0610772104_6.pdf [file pnas_0610772104_6.pdf]
