# Supplementary material
Source: PubMed Central journal article supplement (PMC1794290)
Supplement: pnas_0610772104_7.pdf [file pnas_0610772104_7.pdf]

**Table 2: *H. sapiens* Recon 1 simulation list.** A complete list of the 288 simulations used to validate Recon 1. Objective column # refers to the column in SI Table 4 that is optimized in the flux balance analysis simulation.

| Simulation # | Simulation Name               | Objective Column # |
|--------------|-------------------------------|--------------------|
| 1            | His -> glu-L                  | 697                |
| 2            | hista -> im4ac                | 760                |
| 3            | his-L -> hista                | 749                |
| 4            | hista -> 3mlda                | 481                |
| 5            | pro-L -> glu-L                | 698                |
| 6            | glu-L -> pro-L                | 877                |
| 7            | arg-L -> glu-L (m)            | 698                |
| 8            | ATP max aerobic, glc, v0.05   | 11                 |
| 9            | arg-L -> no                   | 827                |
| 10           | asp-L + hco3 -> arg-L         | 553                |
| 11           | ptrc -> ala-B                 | 537                |
| 12           | ura -> ala-B                  | 537                |
| 13           | carn -> ala-B                 | 537                |
| 14           | msa -> ala-B                  | 537                |
| 15           | ala-B -> msa                  | 800                |
| 16           | ptrc -> spmd                  | 904                |
| 17           | spmd -> sprm                  | 905                |
| 18           | ala-L -> ala-D                | 538                |
| 19           | ala-D -> pyr                  | 881                |
| 20           | ATP max, anaerobic glc, v0.05 | 11                 |
| 21           | gln-L(m) -> glu-L(m)          | 698                |
| 22           | glu-L(m) -> akg(m)            | 535                |
| 23           | cys-L + glu-L + gly -> ghtrd  | 720                |
| 24           | ghtrd reduces h2o2            | 719                |
| 25           | phe-L -> tyr-L                | 930                |
| 26           | phe-L -> phpyr                | 861                |
| 27           | phe-L -> pheacgln             | 858                |
| 28           | phe-L -> peamn                | 853                |
| 29           | phe-L -> pacald               | 842                |
| 30           | phe-L -> pac                  | 841                |
| 31           | phe-L -> phaccoa              | 856                |
| 32           | selmeth -> selnp              | 899                |
| 33           | dna(n) -> dna5mtc(n)          | 624                |
| 34           | cys-L -> hyptaur              | 756                |
| 35           | hyptaur(c) -> taur(x)         | 912                |
| 36           | Lcyst(c) -> taur(x)           | 912                |
| 37           | taur(x) -> tchola(x)          | 913                |
| 38           | trp-L -> accoa                | 511                |
| 39           | trp-L -> srtn                 | 907                |
| 40           | trp-L -> melatn               | 791                |
| 41           | trp-L -> Lfmkynr              | 495                |
| 42           | trp-L -> Lkynr                | 496                |
| 43           | trp-L -> nformanth            | 821                |
| 44           | srtn -> 5moxact               | 488                |
| 45           | srtn -> 6hoxmelatn            | 490                |
| 46           | srtn -> fna5moxam             | 659                |
| 47           | srtn -> nmthsrtn              | 826                |

| Simulation # | Simulation Name                                   | Objective Column # |
|--------------|---------------------------------------------------|--------------------|
| 48           | srtm -> f5hoxkyn                                  | 644                |
| 49           | trp-L -> quln                                     | 887                |
| 50           | trp-L -> id3acald                                 | 757                |
| 51           | trp-L -> anth                                     | 550                |
| 52           | trp-L -> kynate                                   | 774                |
| 53           | tyr-L -> fum + acac                               | 508                |
| 54           | tyr-L -> T3 + T4                                  | 924                |
| 55           | tyr-L -> 34hpp                                    | 479                |
| 56           | tyr-L -> nrpphr                                   | 828                |
| 57           | tyr-L -> adrnl                                    | 530                |
| 58           | tyr-L -> melanin                                  | 790                |
| 59           | tyr-L -> 4hphac                                   | 484                |
| 60           | tyr-L -> dopa                                     | 633                |
| 61           | dopa -> homoval (1)                               | 751                |
| 62           | dopa -> homoval (2)                               | 751                |
| 63           | nrpphr -> 34dhoxpeg                               | 478                |
| 64           | adrnl -> 34dhoxpeg                                | 478                |
| 65           | adrnl -> 34dhoxpeg (2)                            | 478                |
| 66           | arg -> no                                         | 827                |
| 67           | orn -> ptrc                                       | 879                |
| 68           | orn -> spmd                                       | 904                |
| 69           | orn -> sprm                                       | 905                |
| 70           | arg-L -> pcreat                                   | 850                |
| 71           | arg-L -> creat                                    | 593                |
| 72           | glu5sa -> pro-L                                   | 876                |
| 73           | tyr-L -> T3 + T4 (2)                              | 924                |
| 74           | adrnl -> 34dhoxpeg (3)                            | 478                |
| 75           | dmpp -> ggdp                                      | 691                |
| 76           | ipdp(x) -> sql(r)                                 | 906                |
| 77           | coke(r) -> pecgoncoa(r)                           | 854                |
| 78           | acorn -> orn                                      | 839                |
| 79           | 4hpro-LT(m) -> glx(m)                             | 702                |
| 80           | lys-L [c] -->accoa [m] (via sacrcp-L pathway)     | 513                |
| 81           | akg[c] --> glu-L[c] via ALATA_L                   | 697                |
| 82           | akg[c] --> glu-L[c] via ASPTA                     | 697                |
| 83           | akg[m] --> glu-L[m] via ASPTAm                    | 698                |
| 84           | glu-L-->gln-L[c]                                  | 694                |
| 85           | gln-L[m]-->glu-L[m]                               | 698                |
| 86           | 4abut --> succ [m]                                | 908                |
| 87           | glu-L-->4abut                                     | 483                |
| 88           | lys-L[x] -->aacoa [m] (via Lpipecol pathway)      | 513                |
| 89           | 3pg-->ser-L                                       | 900                |
| 90           | 3pg-->gly                                         | 704                |
| 91           | gly --> co2 and nh4 (via glycine cleavage system) | 582                |
| 92           | thr-L --> ppcoa                                   | 868                |
| 93           | ser-L-->cys-L                                     | 610                |
| 94           | choline --> betaine --> glycine                   | 705                |

| Simulation # | Simulation Name                             | Objective Column # |
|--------------|---------------------------------------------|--------------------|
| 95           | met-L-->cys-L                               | 610                |
| 96           | cys-L--> 3sala -->so4                       | 901                |
| 97           | leu-L --> accoa                             | 513                |
| 98           | ile-L -->accoa                              | 869                |
| 99           | val-L --> succoa                            | 910                |
| 100          | gly -->ser-L --> pyr (via SERD_L)           | 881                |
| 101          | cystine -->cys-L                            | 610                |
| 102          | so4 --> PAPS                                | 847                |
| 103          | o2- --> h2o2 --> o2 + h2o                   | 830                |
| 104          | ATP production via electron transport chain | 560                |
| 105          | 5aop -->pheme                               | 860                |
| 106          | asp-L-->asn-L                               | 556                |
| 107          | asp-L --> oaa                               | 835                |
| 108          | asn-L --> oaa                               | 835                |
| 109          | asp-L-->ala-B                               | 537                |
| 110          | pyr<>ala-L                                  | 881                |
| 111          | ala-L-->pyr                                 | 881                |
| 112          | asp-L-->fum (via dcamp)                     | 667                |
| 113          | asp-L-->fum (via argsuc)                    | 667                |
| 114          | pheme-->bilirub                             | 565                |
| 115          | glc -> pyr                                  | 46                 |
| 116          | glc -> lac-D                                | 776                |
| 117          | glc -> lac + atp + h2o                      | 41                 |
| 118          | pyr -> lac-D                                | 776                |
| 119          | pyr[c] -> accoa[m] + co2[c] + nadh[m]       | 7                  |
| 120          | etoh -> acald                               | 510                |
| 121          | acald -> ac                                 | 506                |
| 122          | lac -> glc                                  | 31                 |
| 123          | glyc -> glc                                 | 31                 |
| 124          | g6p -> ru5p                                 | 890                |
| 125          | g6p -> r5p                                  | 889                |
| 126          | f6p + g3p -> r5p                            | 889                |
| 127          | udpglcur -> xu5p-D                          | 956                |
| 128          | fru -> dhap                                 | 24                 |
| 129          | fru -> g3p                                  | 30                 |
| 130          | gal -> udpgal                               | 942                |
| 131          | glc -> lcts[g] (2)                          | 777                |
| 132          | gal -> glc                                  | 259                |
| 133          | pyr -> nad[m] + h[m]                        | 1923               |
| 134          | pyr -> fad[m] + h[m]                        | 29                 |
| 135          | akg[m] -> oaa[m]                            | 836                |
| 136          | succoa[m] -> oaa[m]                         | 836                |
| 137          | fum [m] -> oaa [m]                          | 836                |
| 138          | ascb -> thrnt                               | 922                |
| 139          | ascb -> eryth                               | 641                |
| 140          | ascb -> lyxnt                               | 781                |
| 141          | ascb -> xyInt                               | 958                |

| Simulation # | Simulation Name                   | Objective Column # |
|--------------|-----------------------------------|--------------------|
| 142          | Tyr-ggn -> glygn2                 | 713                |
| 143          | glygn2 -> glc                     | 31                 |
| 144          | glygn2[e] -> glc[e]               | 260                |
| 145          | strch1[e] -> glc[e]               | 260                |
| 146          | man6p -> kdn                      | 767                |
| 147          | man -> gdpmann                    | 690                |
| 148          | fuc -> gdpfuc                     | 688                |
| 149          | gdpmann -> gdpfuc                 | 688                |
| 150          | gam6p -> uacgam                   | 54                 |
| 151          | acgal -> udpacgal                 | 938                |
| 152          | acgam -> cmpacna                  | 578                |
| 153          | g1p -> dtdprmn                    | 635                |
| 154          | glc -> inost                      | 762                |
| 155          | inost -> xu5p-D                   | 956                |
| 156          | inost -> pail_hs                  | 845                |
| 157          | inost -> pail4p_hs                | 844                |
| 158          | pail45p -> mi145p                 | 795                |
| 159          | mi145p -> inost                   | 762                |
| 160          | inost -> pail45p_hs               | 843                |
| 161          | itacon[m] -> pyr[m]               | 882                |
| 162          | mescon[m] -> pyr[m]               | 882                |
| 163          | hpyr -> 2pg                       | 477                |
| 164          | hpyr -> glyclt                    | 711                |
| 165          | xylu-D -> glyclt                  | 711                |
| 166          | glyclt -> gly                     | 704                |
| 167          | glyx -> oxa                       | 840                |
| 168          | glx[m] -> glyclt[m]               | 712                |
| 169          | hpyr -> glyc-S                    | 709                |
| 170          | dhap -> mthgxl                    | 801                |
| 171          | g3p -> mthgxl                     | 801                |
| 172          | acetone -> mthgxl                 | 801                |
| 173          | aact -> mthgxl                    | 801                |
| 174          | mthgxl -> lac-D                   | 776                |
| 175          | mthgxl -> 12ppd-S                 | 473                |
| 176          | 12ppd-S -> mthgxl                 | 801                |
| 177          | 12ppd-S -> pyr                    | 881                |
| 178          | ppcoa[m] -> succoa[m]             | 910                |
| 179          | acac[m] -> acetone [m]            | 516                |
| 180          | acac[m] -> bhb[m]                 | 564                |
| 181          | hmgcoa(x)->frdp(x)                | 663                |
| 182          | hmgcoa(x)->chsterol(r)            | 2287               |
| 183          | hmgcoa(x)-chsterol(r)             | 1885               |
| 184          | hmgcoa(x)->xoldiolone(r)          | 3427               |
| 185          | hmgcoa(x)->xoltriol(c)            | 1300               |
| 186          | xoltriol(m)->thcholstoic(m) v0.05 | 915                |
| 187          | pmtcoa(c)->crmp_hs(c)             | 1886               |
| 188          | pmtcoa(c)->sphmyln_hs(c)          | 3920               |

| Simulation # | Simulation Name                            | Objective Column # |
|--------------|--------------------------------------------|--------------------|
| 189          | galgluside_hs(g) -> gd1c_hs(g)             | 3985               |
| 190          | galgluside_hs(g) -> gq1balpha_hs(g)        | 3974               |
| 191          | galgluside_hs(g) -> gq1balpha_hs(g) path 2 | 3973               |
| 192          | galgluside_hs(g) -> gq1balpha_hs(g) path 3 | 3979               |
| 193          | galgluside_hs(g) -> gp1c_hs(g)             | 3976               |
| 194          | galgluside_hs(g) -> gd1b2_hs(g)            | 3972               |
| 195          | galgluside_hs(g) -> acgagbside_hs(g)       | 2479               |
| 196          | galgluside(g) -> galgalgalthcrm_hs(g)      | 1493               |
| 197          | galgluside_hs(g) -> acnacngalgbside_hs(g)  | 3980               |
| 198          | gluside_hs(g) -> galgluside_hs(g)          | 1499               |
| 199          | thcholstoic(x)->gchola(x) v0.05            | 682                |
| 200          | thcholstoich(x)->tchola(x) v0.05           | 913                |
| 201          | arachd(r) -> txa2(r)                       | 4131               |
| 202          | glyc(c) + Rtotal(c) -> tag_hs(c) v0.05     | 911                |
| 203          | chol(c) + dag_hs(c) -> pe_hs(c)            | 3653               |
| 204          | from thm(e) to thmpp(m)                    | 53                 |
| 205          | from thmmp(e) to thmpp(m)                  | 53                 |
| 206          | from thmmp(e) to thmpp(c)                  | 52                 |
| 207          | from thm(c) to thmpp(c)                    | 52                 |
| 208          | from prpp to imp                           | 39                 |
| 209          | from adn(c) to urate(x)                    | 56                 |
| 210          | from imp(c) to urate(x)                    | 56                 |
| 211          | from gsn(c) to urate(x)                    | 56                 |
| 212          | from imp to atp                            | 12                 |
| 213          | from imp to gtp                            | 35                 |
| 214          | from cytd to ala-B                         | 9                  |
| 215          | from cmp to cytd                           | 9                  |
| 216          | from ump to ala-B                          | 9                  |
| 217          | from dcmp to ala-B                         | 9                  |
| 218          | missing dtmp-3aib testing                  | 2                  |
| 219          | from gln-L + HCO3 to UMP(c)                | 55                 |
| 220          | from ADP(c) to dATP(n)                     | 19                 |
| 221          | from ADP(c) to dATP(n) 2                   | 19                 |
| 222          | from GDP(c) to dGTP(n)                     | 23                 |
| 223          | from CDP(c) to dCTP(n)                     | 21                 |
| 224          | from GDP(c) to dGTP(n) 2                   | 23                 |
| 225          | from UDP(c) to dTTP(n)                     | 27                 |
| 226          | from tyr-L(m) to q10(m)                    | 49                 |
| 227          | val-L-->3aib                               | 480                |
| 228          | val-L --> succoa                           | 910                |
| 229          | from pydx(c) to pydx5p(c)                  | 45                 |
| 230          | from hxan(c) to imp(c)                     | 39                 |
| 231          | from gua(c) to gmp(c)                      | 33                 |
| 232          | from ade(c) to amp(c)                      | 10                 |
| 233          | thcholstoic(x) -> gchola(x)                | 1501               |
| 234          | thcholstoic(x) -> tchola(x)                | 1502               |
| 235          | gln -> nh4 v0.05                           | 342                |

| Simulation # | Simulation Name                                 | Objective Column # |
|--------------|-------------------------------------------------|--------------------|
| 236          | R_group                                         | 2234               |
| 237          | arachd(c)->malcoa(m)                            | 2153               |
| 238          | accoa(c)->pmtcoa(c)->malcoa(m)                  | 42                 |
| 239          | glyc(c) + Rtotal(c) + Rtotal2(c) -> dag_hs(c)   | 17                 |
| 240          | phytcoa(x)->dmnoncoa(m) v0.05                   | 620                |
| 241          | frdp -> dolichol_U                              | 627                |
| 242          | frdp -> dolichol_L                              | 626                |
| 243          | dolichol_L -> dolmanp_L[r]                      | 629                |
| 244          | dolichol_U -> dolmanp_U[r]                      | 630                |
| 245          | dolichol_U -> g3m8mpdol_U[r]                    | 672                |
| 246          | dolichol_L -> g3m8mpdol_L[r]                    | 670                |
| 247          | uacgam -> m8masn[r]                             | 784                |
| 248          | m8masn[r] -> nm4masn[g]                         | 825                |
| 249          | nm4masn[g] -> l2fn2m2masn[g]                    | 775                |
| 250          | nm4masn[g] -> s2l2fn2m2masn[g]                  | 891                |
| 251          | nm4masn[g] -> n2m2nmasn[g]                      | 802                |
| 252          | s2l2fn2m2masn[l] -> man[l] + acgam[l]           | 60                 |
| 253          | n2m2nmasn[l] -> man[l] + acgam[l]               | 60                 |
| 254          | Ser/Thr[g] + udpacgal[g] -> dsTn_antigen[g]     | 634                |
| 255          | Ser/Thr[g] + udpacgal[g] -> sTn_antigen[g]      | 894                |
| 256          | Ser/Thr[g] + udpacgal[g] -> core2[g]            | 591                |
| 257          | Ser/Thr[g] + udpacgal[g] -> core4[g]            | 592                |
| 258          | pail_hs -> gpi_prot_hs[r]                       | 715                |
| 259          | uacgam + udpglcur -> ha[e]                      | 37                 |
| 260          | ha[l] -> acgam[l] + glcur[l]                    | 58                 |
| 261          | Ser-Gly/Ala-X-Gly[er] -> cs_pre[g]              | 598                |
| 262          | Ser-Gly/Ala-X-Gly[er] -> cspg_a[g]              | 599                |
| 263          | Ser-Gly/Ala-X-Ser[er] -> cspg_b[g]              | 601                |
| 264          | Ser-Gly/Ala-X-Gly[er] -> cspg_c[g]              | 603                |
| 265          | Ser-Gly/Ala-X-Gly[er] -> cspg_d[g]              | 605                |
| 266          | Ser-Gly/Ala-X-Gly[er] -> cspg_e[g]              | 607                |
| 267          | core2[g] -> ksii_core2[g]                       | 770                |
| 268          | core4[g] -> ksii_core4[g]                       | 772                |
| 269          | l2fn2m2masn[g] -> ksi[g]                        | 768                |
| 270          | Ser-Gly/Ala-X-Gly[er] -> hspg[g]                | 753                |
| 271          | hspg[ly] -> 2 gal[ly] + glcur[ly] + xyl-D[ly]   | 4                  |
| 272          | cspg_a[ly] -> 2 gal[ly] + glcur[ly] + xyl-D[ly] | 4                  |
| 273          | cspg_b[ly] -> 2gal[ly] + glcur[ly] + xyl-D[ly]  | 4                  |
| 274          | cspg_c[ly] -> 2 gal[ly] + glcur[ly] + xyl-D[ly] | 4                  |
| 275          | cspg_d[ly] -> 2 gal[ly] + glcur[ly] + xyl-D[ly] | 4                  |
| 276          | cspg_e[ly] -> 2 gal[ly] + glcur[ly] + xyl-D[ly] | 4                  |
| 277          | ksi[l] -> man[l] + acgam[l]                     | 60                 |
| 278          | ksii_core2[ly] -> Ser/Thr[ly]                   | 503                |
| 279          | ksii_core4[ly] -> Ser/Thr[ly]                   | 503                |
| 280          | Human Recon 1 test mouse biomass 2              | 4274               |
| 281          | ATP max, aerobic, citrate v0.05                 | 11                 |
| 282          | ATP max, aerobic, glutamine substrate v0.05     | 11                 |

| <b>Simulation #</b> | <b>Simulation Name</b>                    | <b>Objective Column #</b> |
|---------------------|-------------------------------------------|---------------------------|
| 283                 | ATP max, aerobic, EtOH substrate v0.05    | 11                        |
| 284                 | ATP max, aerobic, lactate substrate v0.05 | 11                        |
| 285                 | ATP max, aerobic, glutamate v0.05         | 11                        |
| 286                 | ATP max, aerobic, glycine substrate v0.05 | 11                        |
| 287                 | ATP max, aerobic, proline substrate v0.05 | 11                        |
| 288                 | orn -> nh4 v0.05                          | 342                       |
