# Supplementary material
Source: PubMed Central journal article supplement (PMC1794290)
Supplement: pnas_0610772104_8.pdf [file pnas_0610772104_8.pdf]

**Table 3: Rows of the stoichiometric matrix (metabolites).** Ordered list of rows of the stoichiometric matrix used in the debugging simulations (SI Table 2).

| Row | Metabolite # | Abbreviation      | Metabolite Name                                                          | Compartment |
|-----|--------------|-------------------|--------------------------------------------------------------------------|-------------|
| 1   | 286c         | 10fthf(c)         | 10-Formyltetrahydrofolate                                                | Cytosol     |
| 2   | 20786c       | 10fthf5glu(c)     | 10-formyltetrahydrofolate-[Glu](5)                                       | Cytosol     |
| 3   | 20787c       | 10fthf6glu(c)     | 10-formyltetrahydrofolate-[Glu](6)                                       | Cytosol     |
| 4   | 20788c       | 10fthf7glu(c)     | 10-formyltetrahydrofolate-[Glu](7)                                       | Cytosol     |
| 5   | 22812c       | 11-cis-retfa(c)   | fatty acid 11-cis-retinol                                                | Cytosol     |
| 6   | 3407c        | 11doctsl(c)       | 11-Deoxycortisol                                                         | Cytosol     |
| 7   | 2404c        | 11doctstrn(c)     | 11-Deoxycorticosterone                                                   | Cytosol     |
| 8   | 3552c        | 12HPET(c)         | 12-Hydroperoxyeicosa-5,8,10,14-tetraenoate                               | Cytosol     |
| 9   | 20144c       | 12RHPET(c)        | 12R-Hydroperoxyeicosatetraenoate                                         | Cytosol     |
| 10  | 2181c        | 12ppd-R(c)        | (R)-Propane-1,2-diol                                                     | Cytosol     |
| 11  | 1889c        | 12ppd-S(c)        | (S)-Propane-1,2-diol                                                     | Cytosol     |
| 12  | 22815c       | 13-cis-oretn(c)   | 13-cis-oxo-retinoic acid                                                 | Cytosol     |
| 13  | 22814c       | 13-cis-retn(c)    | 13-cis-retinoate                                                         | Cytosol     |
| 14  | 22816c       | 13-cis-retnql(c)  | 13-cis-retinoyl glucuronide                                              | Cytosol     |
| 15  | 812c         | 13dampp(c)        | 1,3-Diaminopropane                                                       | Cytosol     |
| 16  | 288c         | 13dpg(c)          | 3-Phospho-D-glyceroyl phosphate                                          | Cytosol     |
| 17  | 4422c        | 15HPET(c)         | 15-Hydroperoxyeicosatetraenoic acid                                      | Cytosol     |
| 18  | 3713c        | 17ahprgnlone(c)   | 17alpha-Hydroxypregnenolone                                              | Cytosol     |
| 19  | 769c         | 17ahprgstrn(c)    | 17alpha-Hydroxyprogesterone                                              | Cytosol     |
| 20  | 18732c       | 1mncam(c)         | 1-Methylnicotinamide                                                     | Cytosol     |
| 21  | 4589c        | 1mpyr(c)          | 1-Methylpyrrolinium                                                      | Cytosol     |
| 22  | 2994c        | 1pyr5c(c)         | 1-Pyrroline-5-carboxylate                                                | Cytosol     |
| 23  | 4195c        | 23doguln(c)       | 2,3-Dioxo-L-gulonate                                                     | Cytosol     |
| 24  | 5576c        | 23dpg(c)          | 2,3-Disphospho-D-glycerate                                               | Cytosol     |
| 25  | 20023c       | 2425dhvitd2(c)    | 24R,25-Dihydroxyvitamin D2                                               | Cytosol     |
| 26  | 20024c       | 2425dhvitd3(c)    | 24R,25-Dihydroxyvitamin D3                                               | Cytosol     |
| 27  | 20412c       | 24nph(c)          | 2,4 dihydroxy nitrophenol                                                | Cytosol     |
| 28  | 3554c        | 25aics(c)         | (S)-2-[5-Amino-1-(5-phospho-D-riboseyl)imidazole-4-carboxamido]succinate | Cytosol     |
| 29  | 20014c       | 25hvitd2(c)       | 25-Hydroxyvitamin D2                                                     | Cytosol     |
| 30  | 20012c       | 25hvitd3(c)       | 25-Hydroxyvitamin D3                                                     | Cytosol     |
| 31  | 1585c        | 2amac(c)          | 2-Aminoacrylate                                                          | Cytosol     |
| 32  | 2735c        | 2ameph(c)         | (2-Aminoethyl)phosphonate                                                | Cytosol     |
| 33  | 11252c       | 2c23dh56dhoxin(c) | 2-Carboxy-2,3-dihydro-5,6-dihydroxyindole                                | Cytosol     |
| 34  | 4321c        | 2coum(c)          | cis-2-Hydroxy cinnamate                                                  | Cytosol     |
| 35  | 446c         | 2dr1p(c)          | 2-Deoxy-D-ribose 1-phosphate                                             | Cytosol     |
| 36  | 447c         | 2dr5p(c)          | 2-Deoxy-D-ribose 5-phosphate                                             | Cytosol     |
| 37  | 4433c        | 2hb(c)            | 2-Hydroxybutyrate                                                        | Cytosol     |
| 38  | 4332c        | 2hyoxplac(c)      | 2-Hydroxyphenylacetate                                                   | Cytosol     |
| 39  | 5757c        | 2kmb(c)           | 2-keto-4-methylthiobutyrate                                              | Cytosol     |
| 40  | 3219c        | 2mcaen(c)         | cis-2-Methylaconitate                                                    | Cytosol     |
| 41  | 1591c        | 2mcit(c)          | 2-Methylcitrate                                                          | Cytosol     |
| 42  | 1071c        | 2obut(c)          | 2-Oxobutanoate                                                           | Cytosol     |
| 43  | 9002c        | 2oxoadp(c)        | 2-Oxoadipate                                                             | Cytosol     |
| 44  | 1120c        | 2pg(c)            | D-Glycerate 2-phosphate                                                  | Cytosol     |
| 45  | 813c         | 2pglyc(c)         | 2-Phosphoglycolate                                                       | Cytosol     |
| 46  | 787c         | 34dhcinm(c)       | 3,4-Dihydroxy-trans-cinnamate                                            | Cytosol     |
| 47  | 3465c        | 34dhmald(c)       | 3,4-Dihydroxymandelaldehyde                                              | Cytosol     |
| 48  | 4121c        | 34dhoxmand(c)     | 3,4-Dihydroxymandelate                                                   | Cytosol     |
| 49  | 3464c        | 34dhoxpeg(c)      | 3,4-Dihydroxyphenylethyleneglycol                                        | Cytosol     |
| 50  | 3087c        | 34dhpac(c)        | 3,4-Dihydroxyphenylacetaldehyde                                          | Cytosol     |
| 51  | 916c         | 34dhpha(c)        | 3,4-Dihydroxyphenylacetate                                               | Cytosol     |

| Row | Metabolite # | Abbreviation      | Metabolite Name                                | Compartment |
|-----|--------------|-------------------|------------------------------------------------|-------------|
| 52  | 190c         | 34dhphe(c)        | 3,4-Dihydroxy-L-phenylalanine                  | Cytosol     |
| 53  | 772c         | 34hpp(c)          | 3-(4-Hydroxyphenyl)pyruvate                    | Cytosol     |
| 54  | 9005c        | 35cgm(c)          | 3',5'-Cyclic GMP                               | Cytosol     |
| 55  | 693c         | 35dioty(c)        | 3,5-Diiodo-L-tyrosine                          | Cytosol     |
| 56  | 2457c        | 3aib(c)           | L-3-Amino-isobutanoate                         | Cytosol     |
| 57  | 2444c        | 3aib-D(c)         | D-3-Amino-isobutanoate                         | Cytosol     |
| 58  | 1111c        | 3dhgln(c)         | 3-Dehydro-L-gulonate                           | Cytosol     |
| 59  | 8537c        | 3dsphgn(c)        | 3-Dehydrosphinganine                           | Cytosol     |
| 60  | 9007c        | 3hanthrn(c)       | 3-Hydroxyanthranilate                          | Cytosol     |
| 61  | 4184c        | 3hpcoa(c)         | 3-Hydroxypropionyl-CoA                         | Cytosol     |
| 62  | 7127c        | 3hpp(c)           | 3-Hydroxypropanoate                            | Cytosol     |
| 63  | 7135c        | 3htmelys(c)       | 3-Hydroxy-N6,N6,N6-trimethyl-L-lysine          | Cytosol     |
| 64  | 4156c        | 3hxkynam(c)       | 3-Hydroxykynurenamine                          | Cytosol     |
| 65  | 1810c        | 3ityr-L(c)        | 3-Iodo-L-tyrosine                              | Cytosol     |
| 66  | 4123c        | 3m4hpga(c)        | 3-Methoxy-4-hydroxyphenylglycolaldehyde        | Cytosol     |
| 67  | 10891c       | 3mlda(c)          | 3-Methylimidazoleacetic acid                   | Cytosol     |
| 68  | 4313c        | 3mldz(c)          | 3-Methylimidazole acetaldehyde                 | Cytosol     |
| 69  | 225c         | 3mob(c)           | 3-Methyl-2-oxobutanoate                        | Cytosol     |
| 70  | 445c         | 3mop(c)           | (S)-3-Methyl-2-oxopentanoate                   | Cytosol     |
| 71  | 4124c        | 3mox4hoxm(c)      | 3-Methoxy-4-hydroxymandelate                   | Cytosol     |
| 72  | 4122c        | 3mox4hpac(c)      | 3-Methoxy-4-hydroxyphenylacetaldehyde          | Cytosol     |
| 73  | 4126c        | 3moxytyr(c)       | 3-Methoxytyramine                              | Cytosol     |
| 74  | 4211c        | 3padsel(c)        | 3'-Phosphoadenylylselenate                     | Cytosol     |
| 75  | 259c         | 3pg(c)            | 3-Phospho-D-glycerate                          | Cytosol     |
| 76  | 9544c        | 3php(c)           | 3-Phosphohydroxypyruvate                       | Cytosol     |
| 77  | 1105c        | 3sala(c)          | 3-Sulfino-L-alanine                            | Cytosol     |
| 78  | 3427c        | 3snpyr(c)         | 3-Sulfonopyruvate                              | Cytosol     |
| 79  | 15766c       | 3spyr(c)          | 3-Sulfopyruvate                                | Cytosol     |
| 80  | 10517c       | 3uib(c)           | 3-Ureidoisobutyrate                            | Cytosol     |
| 81  | 4163c        | 42A3HP24DB(c)     | 4-(2-Amino-3-hydroxyphenyl)-2,4-dioxobutanoate | Cytosol     |
| 82  | 9128c        | 44mctr(c)         | 4,4-dimethylcholesta-8,14,24-trienol           | Cytosol     |
| 83  | 4159c        | 46dhoxquin(c)     | 4,6-Dihydroxyquinoline                         | Cytosol     |
| 84  | 4157c        | 48dhoxquin(c)     | 4,8-Dihydroxyquinoline                         | Cytosol     |
| 85  | 7924c        | 4aabutn(c)        | 4-Acetamidobutanoate                           | Cytosol     |
| 86  | 176c         | 4abut(c)          | 4-Aminobutanoate                               | Cytosol     |
| 87  | 376c         | 4abutn(c)         | 4-Aminobutanal                                 | Cytosol     |
| 88  | 7132c        | 4aphdob(c)        | 4-(2-Aminophenyl)-2,4-dioxobutanoate           | Cytosol     |
| 89  | 9008c        | 4fumacac(c)       | 4-Fumarylacetoacetate                          | Cytosol     |
| 90  | 896c         | 4h2oglt(c)        | 4-Hydroxy-2-oxoglutarate                       | Cytosol     |
| 91  | 20409c       | 4hdebrisoquine(c) | 4 hydroxy debrisoquine                         | Cytosol     |
| 92  | 2887c        | 4hoxpacd(c)       | 4-Hydroxyphenylacetaldehyde                    | Cytosol     |
| 93  | 1127c        | 4hphac(c)         | 4-Hydroxyphenylacetate                         | Cytosol     |
| 94  | 2826c        | 4izp(c)           | 4-Imidazolone-5-propanoate                     | Cytosol     |
| 95  | 9010c        | 4mlacac(c)        | 4-Maleylacetoacetate                           | Cytosol     |
| 96  | 285c         | 4mop(c)           | 4-Methyl-2-oxopentanoate                       | Cytosol     |
| 97  | 20411c       | 4mtolbutamide(c)  | 4 hydroxy tolbutamide                          | Cytosol     |
| 98  | 730c         | 4nph(c)           | 4-Nitrophenol                                  | Cytosol     |
| 99  | 21119c       | 4nphsf(c)         | 4-Nitrophenyl sulfate                          | Cytosol     |
| 100 | 2022c        | 4ppan(c)          | D-4'-Phosphopantothenate                       | Cytosol     |
| 101 | 2645c        | 4ppcys(c)         | N-(R)-4-Phosphopantothenoyl-L-cysteine         | Cytosol     |
| 102 | 717c         | 4pyrdx(c)         | 4-Pyridoxate                                   | Cytosol     |

| Row | Metabolite # | Abbreviation        | Metabolite Name                                       | Compartment |
|-----|--------------|---------------------|-------------------------------------------------------|-------------|
| 103 | 908c         | 4tmeabut(c)         | 4-Trimethylammoniobutanal                             | Cytosol     |
| 104 | 7131c        | 4tmeabutn(c)        | 4-Trimethylammoniobutanoate                           | Cytosol     |
| 105 | 7551c        | 56dihindlcrbxlt(c)  | 5,6-Dihydroxyindole-2-carboxylate                     | Cytosol     |
| 106 | 751c         | 56dthm(c)           | 5,6-Dihydrothymine                                    | Cytosol     |
| 107 | 423c         | 56dura(c)           | 5,6-dihydrouracil                                     | Cytosol     |
| 108 | 3862c        | 5HPET(c)            | 5-Hydroperoxy-6-trans-8,11,14-cis-eicosatetraenoate   | Cytosol     |
| 109 | 10712c       | 5adtststerone(c)    | 5alpha-Dihydrotestosterone                            | Cytosol     |
| 110 | 22786c       | 5adtststeroneglc(c) | 5alpha-Dihydrotestosterone glucuronide                | Cytosol     |
| 111 | 26487c       | 5adtststerones(c)   | 5alpha-Dihydrotestosterone sulfate                    | Cytosol     |
| 112 | 10916c       | 5aizc(c)            | 5-amino-1-(5-phospho-D-ribose)imidazole-4-carboxylate | Cytosol     |
| 113 | 424c         | 5aop(c)             | 5-Amino-4-oxopentanoate                               | Cytosol     |
| 114 | 20783c       | 5dhf(c)             | pentaglutamyl folate (DHF)                            | Cytosol     |
| 115 | 440c         | 5forthf(c)          | 5-Formiminotetrahydrofolate                           | Cytosol     |
| 116 | 11866c       | 5fthf(c)            | 5-Formyltetrahydrofolate                              | Cytosol     |
| 117 | 20405c       | 5homeprazole(c)     | 5 hydroxy omeprazole                                  | Cytosol     |
| 118 | 4155c        | 5hoxindact(c)       | 5-Hydroxyindoleacetaldehyde                           | Cytosol     |
| 119 | 11161c       | 5hoxindoa(c)        | 5-Hydroxyindoleacetate                                | Cytosol     |
| 120 | 4166c        | 5hoxnfkyn(c)        | 5-Hydroxy-N-formylkynurenine                          | Cytosol     |
| 121 | 831c         | 5htrp(c)            | 5-Hydroxy-L-tryptophan                                | Cytosol     |
| 122 | 4169c        | 5hxkyn(c)           | 5-Hydroxykynurenine                                   | Cytosol     |
| 123 | 4158c        | 5hxkynam(c)         | 5-Hydroxykynurenamine                                 | Cytosol     |
| 124 | 3193c        | 5mdr1p(c)           | 5-Methylthio-5-deoxy-D-ribose 1-phosphate             | Cytosol     |
| 125 | 3277c        | 5mdru1p(c)          | 5-Methylthio-5-deoxy-D-ribulose 1-phosphate           | Cytosol     |
| 126 | 4178c        | 5moxact(c)          | 5-Methoxyindoleacetate                                | Cytosol     |
| 127 | 243c         | 5mta(c)             | 5-Methylthioadenosine                                 | Cytosol     |
| 128 | 431c         | 5mthf(c)            | 5-Methyltetrahydrofolate                              | Cytosol     |
| 129 | 14013c       | 5oxpro(c)           | 5-Oxoproline                                          | Cytosol     |
| 130 | 20780c       | 5thf(c)             | pentaglutamyl folate (THF)                            | Cytosol     |
| 131 | 20784c       | 6dhf(c)             | hexaglutamyl folate (DHF)                             | Cytosol     |
| 132 | 4162c        | 6hoxmelatn(c)       | 6-Hydroxymelatonin                                    | Cytosol     |
| 133 | 20402c       | 6htststerone(c)     | 6 beta hydroxy testosterone                           | Cytosol     |
| 134 | 182c         | 6pgc(c)             | 6-Phospho-D-gluconate                                 | Cytosol     |
| 135 | 963c         | 6pgl(c)             | 6-phospho-D-glucono-1,5-lactone                       | Cytosol     |
| 136 | 11000c       | 6pthp(c)            | 6-Pyruvoyl-5,6,7,8-tetrahydropterin                   | Cytosol     |
| 137 | 20781c       | 6thf(c)             | hexaglutamyl folate (THF)                             | Cytosol     |
| 138 | 834c         | 7dhchsterol(c)      | 7-Dehydrocholesterol                                  | Cytosol     |
| 139 | 20785c       | 7dhf(c)             | heptaglutamyl folate (DHF)                            | Cytosol     |
| 140 | 20782c       | 7thf(c)             | heptaglutamyl folate (THF)                            | Cytosol     |
| 141 | 22811c       | 9-cis-retfa(c)      | fatty acid 9-cis-retinol                              | Cytosol     |
| 142 | 69c          | ACP(c)              | acyl carrier protein                                  | Cytosol     |
| 143 | 7546c        | L-dpchrn(c)         | L-Dopachrome                                          | Cytosol     |
| 144 | 9011c        | L2aadp(c)           | L-2-Amino adipate                                     | Cytosol     |
| 145 | 7588c        | L2aadp6sa(c)        | L-2-Amino adipate 6-semialdehyde                      | Cytosol     |
| 146 | 120c         | Lcyst(c)            | L-Cysteate                                            | Cytosol     |
| 147 | 105c         | Lcystin(c)          | L-Cystine                                             | Cytosol     |
| 148 | 7641c        | Lfmkynr(c)          | L-Formylkynurenine                                    | Cytosol     |
| 149 | 9013c        | Lkynr(c)            | L-Kynurenine                                          | Cytosol     |
| 150 | 679c         | Nacasp(c)           | N-Acetyl-L-aspartate                                  | Cytosol     |
| 151 | 10790c       | Nacsertn(c)         | N-Acetylserotonin                                     | Cytosol     |
| 152 | 18469c       | R1coa_hs(c)         | R group 1 Coenzyme A homo sapiens                     | Cytosol     |

| Row | Metabolite # | Abbreviation                                          | Metabolite Name                                                   | Compartment |
|-----|--------------|-------------------------------------------------------|-------------------------------------------------------------------|-------------|
| 153 | 18470c       | R2coa_hs(c)                                           | R group 2 Coenzyme A homo sapiens                                 | Cytosol     |
| 154 | 18471c       | R3coa_hs(c)                                           | R group 3 Coenzyme A homo sapiens                                 | Cytosol     |
| 155 | 18493c       | R4coa_hs(c)                                           | R group 4 Coenzyme A homo sapiens                                 | Cytosol     |
| 156 | 18494c       | R5coa_hs(c)                                           | R group 5 Coenzyme A homo sapiens                                 | Cytosol     |
| 157 | 20277c       | R6coa_hs(c)                                           | R group 6 Coenzyme A homo sapiens                                 | Cytosol     |
| 158 | 18523c       | Rtotal(c)                                             | R total                                                           | Cytosol     |
| 159 | 18525c       | Rtotal2(c)                                            | R total 2 position                                                | Cytosol     |
| 160 | 22166c       | Rtotal2coa(c)                                         | R total 2 coenzyme A                                              | Cytosol     |
| 161 | 22470c       | Rtotal2crn(c)                                         | R total 2 carnitine                                               | Cytosol     |
| 162 | 18526c       | Rtotal3(c)                                            | R total 3 position                                                | Cytosol     |
| 163 | 22167c       | Rtotal3coa(c)                                         | R total 3 Coenzyme A                                              | Cytosol     |
| 164 | 22471c       | Rtotal3crn(c)                                         | R total 3 carnitine                                               | Cytosol     |
| 165 | 22165c       | Rtotalcoa(c)                                          | R total Coenzyme A                                                | Cytosol     |
| 166 | 22469c       | Rtotalcrn(c)                                          | R total carnitine                                                 | Cytosol     |
| 167 | 9015c        | Sfglutth(c)                                           | S-Formylglutathione                                               | Cytosol     |
| 168 | 656c         | T4hcinm(c)                                            | trans-4-Hydroxycinnamate                                          | Cytosol     |
| 169 | 18059c       | Tyr-ggn(c)                                            | Tyr-194 of apo-glycogenin protein (primer for glycogen synthesis) | Cytosol     |
| 170 | 174c         | aacoa(c)                                              | Acetoacetyl-CoA                                                   | Cytosol     |
| 171 | 1533c        | aact(c)                                               | Aminoacetone                                                      | Cytosol     |
| 172 | 360c         | abt(c)                                                | L-Arabinitol                                                      | Cytosol     |
| 173 | 319c         | ac(c)                                                 | Acetate                                                           | Cytosol     |
| 174 | 5509c        | acACP(c)                                              | Acetyl-ACP                                                        | Cytosol     |
| 175 | 9016c        | acac(c)                                               | Acetoacetate                                                      | Cytosol     |
| 176 | 1052c        | acald(c)                                              | Acetaldehyde                                                      | Cytosol     |
| 177 | 11537c       | accoa(c)                                              | Acetyl-CoA                                                        | Cytosol     |
| 178 | 3775c        | acetol(c)                                             | Acetol                                                            | Cytosol     |
| 179 | 266c         | acetone(c)                                            | Acetone                                                           | Cytosol     |
| 180 | 19739c       | acgagbside_hs(c)                                      | alpha GalNAc globoside (homo sapiens)                             | Cytosol     |
| 181 | 899c         | acgal(c)                                              | N-Acetyl-D-galactosamine                                          | Cytosol     |
| 182 | 19195c       | acgal1p(c)                                            | N-Acetyl-D-galactosamine 1-phosphate                              | Cytosol     |
| 183 | 22669c       | acgalfucgalacgalfuc12gal14acglcgalgluside_hs(c)       | Type IIIA glycolipid                                              | Cytosol     |
| 184 | 22681c       | acgalfucgalacgalfucgalacglcgal14acglcgalgluside_hs(c) | Type IIIAb                                                        | Cytosol     |
| 185 | 224c         | acgam(c)                                              | N-Acetyl-D-glucosamine                                            | Cytosol     |
| 186 | 3247c        | acgam1p(c)                                            | N-Acetyl-D-glucosamine 1-phosphate                                | Cytosol     |
| 187 | 192c         | acgam6p(c)                                            | N-Acetyl-D-glucosamine 6-phosphate                                | Cytosol     |
| 188 | 19740c       | acgbgbside_hs(c)                                      | beta GalNAc globoside (homo sapiens)                              | Cytosol     |
| 189 | 7147c        | acgpail_hs(c)                                         | N-Acetyl-D-glucosaminylphosphatidylinositol                       | Cytosol     |
| 190 | 1617c        | ach(c)                                                | Acetylcholine                                                     | Cytosol     |
| 191 | 1129c        | acmana(c)                                             | N-Acetyl-D-mannosamine                                            | Cytosol     |
| 192 | 11865c       | acmanap(c)                                            | N-Acetyl-D-mannosamine 6-phosphate                                | Cytosol     |
| 193 | 19741c       | acn13acngalgsbside_hs(c)                              | sialyl (1,3) sialyl (2,6) galactosylgloboside (homo sapiens)      | Cytosol     |
| 194 | 19742c       | acn23acngalgsbside_hs(c)                              | sialyl (2,3) sialyl (2,6) galactosylgloboside (homo sapiens)      | Cytosol     |
| 195 | 22662c       | acnacngal14acglcgalgluside_hs(c)                      | 3',8'-LD1                                                         | Cytosol     |

| Row | Metabolite # | Abbreviation                              | Metabolite Name                                                                       | Compartment |
|-----|--------------|-------------------------------------------|---------------------------------------------------------------------------------------|-------------|
| 196 | 19738c       | acnacngalgbside_h<br>s(c)                 | disialyl galactosylgloboside (homo sapiens)                                           | Cytosol     |
| 197 | 134c         | acnam(c)                                  | N-Acetylneuraminate                                                                   | Cytosol     |
| 198 | 4637c        | acnamp(c)                                 | N-Acetylneuraminate 9-phosphate                                                       | Cytosol     |
| 199 | 22682c       | acngalacglcgal14ac<br>glcgalgluside_hs(c) | VI3NeuAc-nLc6Cer                                                                      | Cytosol     |
| 200 | 428c         | acorn(c)                                  | N2-Acetyl-L-ornithine                                                                 | Cytosol     |
| 201 | 7471c        | acrn(c)                                   | O-Acetylcarnitine                                                                     | Cytosol     |
| 202 | 228c         | ade(c)                                    | Adenine                                                                               | Cytosol     |
| 203 | 18534c       | adhap_hs(c)                               | acyl-dihydroxyacetone phosphate                                                       | Cytosol     |
| 204 | 270c         | adn(c)                                    | Adenosine                                                                             | Cytosol     |
| 205 | 471c         | adp(c)                                    | ADP                                                                                   | Cytosol     |
| 206 | 112c         | adpglc(c)                                 | ADPglucose                                                                            | Cytosol     |
| 207 | 17282c       | adpman(c)                                 | ADPmannose                                                                            | Cytosol     |
| 208 | 2434c        | adprbp(c)                                 | ADPribose 2'-phosphate                                                                | Cytosol     |
| 209 | 151c         | adprib(c)                                 | ADPribose                                                                             | Cytosol     |
| 210 | 18463c       | adrn(c)                                   | adrenic acid                                                                          | Cytosol     |
| 211 | 18484c       | adrncoa(c)                                | adrenyl coenzyme A                                                                    | Cytosol     |
| 212 | 25984c       | adrncrn(c)                                | Adrenyl carnitine                                                                     | Cytosol     |
| 213 | 641c         | adrnl(c)                                  | Adrenaline                                                                            | Cytosol     |
| 214 | 11113c       | adsel(c)                                  | Adenylylselenate                                                                      | Cytosol     |
| 215 | 20413c       | aflatoxin(c)                              | aflatoxin B1                                                                          | Cytosol     |
| 216 | 247c         | agm(c)                                    | Agmatine                                                                              | Cytosol     |
| 217 | 20819c       | ahandrostanglc(c)                         | Etiocholan-3alpha-ol-17-one 3-glucuronide                                             | Cytosol     |
| 218 | 310c         | ahcys(c)                                  | S-Adenosyl-L-homocysteine                                                             | Cytosol     |
| 219 | 3611c        | ahdt(c)                                   | 2-Amino-4-hydroxy-6-(erythro-1,2,3-<br>trihydroxypropyl)dihydropteridine triphosphate | Cytosol     |
| 220 | 3340c        | aicar(c)                                  | 5-Amino-1-(5-Phospho-D-riboseyl)imidazole-4-<br>carboxamide                           | Cytosol     |
| 221 | 1941c        | air(c)                                    | 5-amino-1-(5-phospho-D-riboseyl)imidazole                                             | Cytosol     |
| 222 | 19360c       | ak2g_hs(c)                                | 1-alkyl 2-acylglycerol                                                                | Cytosol     |
| 223 | 19363c       | ak2gchol_hs(c)                            | 1-alkyl 2-acylglycerol 3-phosphocholine                                               | Cytosol     |
| 224 | 19359c       | ak2gp_hs(c)                               | 1-alkyl 2-acylglycerol 3-phosphate                                                    | Cytosol     |
| 225 | 19361c       | ak2gpe_hs(c)                              | 1-alkyl 2-acylglycerol 3-phosphoethanolamine                                          | Cytosol     |
| 226 | 19364c       | ak2lgchol_hs(c)                           | 1-alkyl 2-lysoglycerol 3-phosphocholine                                               | Cytosol     |
| 227 | 19357c       | akdhap_hs(c)                              | 1-alkyldihydroxyacetone phosphate                                                     | Cytosol     |
| 228 | 314c         | akg(c)                                    | 2-Oxoglutarate                                                                        | Cytosol     |
| 229 | 19358c       | akgp_hs(c)                                | 1-alkylglycerol 3-phosphate (homo sapiens)                                            | Cytosol     |
| 230 | 1063c        | ala-B(c)                                  | beta-Alanine                                                                          | Cytosol     |
| 231 | 1093c        | ala-D(c)                                  | D-Alanine                                                                             | Cytosol     |
| 232 | 11412c       | ala-L(c)                                  | L-Alanine                                                                             | Cytosol     |
| 233 | 73c          | alac-S(c)                                 | (S)-2-Acetolactate                                                                    | Cytosol     |
| 234 | 1447c        | aldstrn(c)                                | Aldosterone                                                                           | Cytosol     |
| 235 | 18535c       | alpa_hs(c)                                | lysophosphatidic acid (homo sapiens)                                                  | Cytosol     |
| 236 | 7642c        | am6sa(c)                                  | 2-Aminomuconate 6-semialdehyde                                                        | Cytosol     |
| 237 | 1086c        | amet(c)                                   | S-Adenosyl-L-methionine                                                               | Cytosol     |
| 238 | 903c         | ametam(c)                                 | S-Adenosylmethioninamine                                                              | Cytosol     |
| 239 | 309c         | amp(c)                                    | AMP                                                                                   | Cytosol     |
| 240 | 7645c        | amuco(c)                                  | 2-Aminomuconate                                                                       | Cytosol     |
| 241 | 352c         | andrstrn(c)                               | Androsterone                                                                          | Cytosol     |
| 242 | 20815c       | andrstrnglc(c)                            | androsterone glucuronide                                                              | Cytosol     |

| Row | Metabolite # | Abbreviation    | Metabolite Name                                                | Compartment |
|-----|--------------|-----------------|----------------------------------------------------------------|-------------|
| 243 | 1070c        | anth(c)         | Anthranilate                                                   | Cytosol     |
| 244 | 20406c       | antipyrene(c)   | antipyrene                                                     | Cytosol     |
| 245 | 8976c        | ap4a(c)         | P1,P4-Bis(5'-adenosyl) tetraphosphate                          | Cytosol     |
| 246 | 2071c        | apnnox(c)       | alpha-Pinene-oxide                                             | Cytosol     |
| 247 | 22737c       | apoC(c)         | Apocarboxylase (no lys residue)                                | Cytosol     |
| 248 | 22735c       | apoC-Lys(c)     | Apocarboxylase (Lys residue)                                   | Cytosol     |
| 249 | 22736c       | apoC-Lys_btn(c) | Holocarboxylase (biotin covalent bound to Lys residue of apoC) | Cytosol     |
| 250 | 4033c        | appnn(c)        | (+)-alpha-Pinene                                               | Cytosol     |
| 251 | 3086c        | aprgstrn(c)     | 20alpha-Hydroxyprogesterone                                    | Cytosol     |
| 252 | 7649c        | aprut(c)        | N-Acetylputrescine                                             | Cytosol     |
| 253 | 279c         | aps(c)          | Adenosine 5'-phosphosulfate                                    | Cytosol     |
| 254 | 816c         | aqcobal(c)      | Aquacob(III)alamin                                             | Cytosol     |
| 255 | 307c         | arab-L(c)       | L-Arabinose                                                    | Cytosol     |
| 256 | 5355c        | arach(c)        | Arachidic acid                                                 | Cytosol     |
| 257 | 18483c       | arachcoa(c)     | arachidyl coenzyme A                                           | Cytosol     |
| 258 | 25967c       | arachcrn(c)     | arachidyl carnitine                                            | Cytosol     |
| 259 | 11890c       | arachd(c)       | arachidonic acid                                               | Cytosol     |
| 260 | 11887c       | arachdcoa(c)    | C20:4-CoA                                                      | Cytosol     |
| 261 | 11889c       | arachdcrn(c)    | C20:4 carnitine                                                | Cytosol     |
| 262 | 337c         | arg-L(c)        | L-Arginine                                                     | Cytosol     |
| 263 | 1962c        | argsuc(c)       | N(omega)-(L-Arginino)succinate                                 | Cytosol     |
| 264 | 11279c       | ascb-L(c)       | L-Ascorbate                                                    | Cytosol     |
| 265 | 232c         | asn-L(c)        | L-Asparagine                                                   | Cytosol     |
| 266 | 10519c       | asp-D(c)        | D-Aspartate                                                    | Cytosol     |
| 267 | 330c         | asp-L(c)        | L-Aspartate                                                    | Cytosol     |
| 268 | 465c         | atp(c)          | ATP                                                            | Cytosol     |
| 269 | 20142c       | avite1(c)       | alpha-Tocopherol                                               | Cytosol     |
| 270 | 20141c       | avite2(c)       | alpha-Tocotrienol                                              | Cytosol     |
| 271 | 4182c        | bamppald(c)     | beta-Aminopropion aldehyde                                     | Cytosol     |
| 272 | 4322c        | bdg2hc(c)       | cis-beta-D-Glucosyl-2-hydroxycinnamate                         | Cytosol     |
| 273 | 392c         | betald(c)       | Betaine aldehyde                                               | Cytosol     |
| 274 | 870c         | bhb(c)          | (R)-3-Hydroxybutanoate                                         | Cytosol     |
| 275 | 4279c        | bildglcur(c)    | Bilirubin beta-diglucuronide                                   | Cytosol     |
| 276 | 1942c        | bilglcur(c)     | Bilirubin monoglucuronide                                      | Cytosol     |
| 277 | 101c         | bilirub(c)      | Bilirubin                                                      | Cytosol     |
| 278 | 114c         | biliverd(c)     | Biliverdin                                                     | Cytosol     |
| 279 | 4297c        | biocyt(c)       | Biocytin                                                       | Cytosol     |
| 280 | 4584c        | btamp(c)        | Biotinyl-5'-AMP                                                | Cytosol     |
| 281 | 1079c        | btn(c)          | Biotin                                                         | Cytosol     |
| 282 | 294c         | but(c)          | Butyrate (n-C4:0)                                              | Cytosol     |
| 283 | 20143c       | bvite(c)        | beta-tocopherol                                                | Cytosol     |
| 284 | 10989c       | bz(c)           | Benzoate                                                       | Cytosol     |
| 285 | 11888c       | c226coa(c)      | cervonyl coenzyme A                                            | Cytosol     |
| 286 | 11883c       | c226crn(c)      | cervonyl carnitine                                             | Cytosol     |
| 287 | 346c         | ca2(c)          | Calcium                                                        | Cytosol     |
| 288 | 11003c       | cala(c)         | N-Carbamoyl-beta-alanine                                       | Cytosol     |
| 289 | 8980c        | camp(c)         | cAMP                                                           | Cytosol     |
| 290 | 14010c       | carn(c)         | L-Carnosine                                                    | Cytosol     |
| 291 | 19576c       | caro(c)         | beta-Carotene                                                  | Cytosol     |
| 292 | 798c         | carveol(c)      | (E)-carveol                                                    | Cytosol     |
| 293 | 429c         | cbasp(c)        | N-Carbamoyl-L-aspartate                                        | Cytosol     |
| 294 | 365c         | cbl2(c)         | Cob(II)alamin                                                  | Cytosol     |

| Row | Metabolite # | Abbreviation    | Metabolite Name                                                | Compartment |
|-----|--------------|-----------------|----------------------------------------------------------------|-------------|
| 295 | 11004c       | cbp(c)          | Carbamoyl phosphate                                            | Cytosol     |
| 296 | 20077c       | cca_d3(c)       | Calcitroic acid (D3)                                           | Cytosol     |
| 297 | 1073c        | cdp(c)          | CDP                                                            | Cytosol     |
| 298 | 9018c        | cdpchol(c)      | CDPcholine                                                     | Cytosol     |
| 299 | 19105c       | cdpdag_hs(c)    | CDP diacylglycerol (homo sapiens)                              | Cytosol     |
| 300 | 387c         | cdpea(c)        | CDPethanolamine                                                | Cytosol     |
| 301 | 7908c        | cgly(c)         | Cys-Gly                                                        | Cytosol     |
| 302 | 14998c       | chito2pdol_L(c) | N,N'-Diacylchitobiosyldiphosphodolichol, human liver homolog   | Cytosol     |
| 303 | 14999c       | chito2pdol_U(c) | N,N'-Diacylchitobiosyldiphosphodolichol, human uterine homolog | Cytosol     |
| 304 | 1075c        | chol(c)         | Choline                                                        | Cytosol     |
| 305 | 457c         | cholate(c)      | Cholate                                                        | Cytosol     |
| 306 | 9019c        | cholp(c)        | Choline phosphate                                              | Cytosol     |
| 307 | 252c         | chsterol(c)     | Cholesterol                                                    | Cytosol     |
| 308 | 26330c       | chsterols(c)    | cholesterol sulfate                                            | Cytosol     |
| 309 | 19243c       | chtn(c)         | chitin                                                         | Cytosol     |
| 310 | 236c         | cit(c)          | Citrate                                                        | Cytosol     |
| 311 | 169c         | citr-L(c)       | L-Citrulline                                                   | Cytosol     |
| 312 | 5268c        | cl(c)           | Chloride                                                       | Cytosol     |
| 313 | 19386c       | clpn_hs(c)      | cardiolipin (homo sapiens)                                     | Cytosol     |
| 314 | 18467c       | clpnd(c)        | clupanodonic acid                                              | Cytosol     |
| 315 | 18488c       | clpndcoa(c)     | clupanodonyl CoA                                               | Cytosol     |
| 316 | 25990c       | clpndcrn(c)     | clupanodonyl carnitine                                         | Cytosol     |
| 317 | 11376c       | cmp(c)          | CMP                                                            | Cytosol     |
| 318 | 4188c        | cmp2amep(c)     | CMP-2-aminoethylphosphonate                                    | Cytosol     |
| 319 | 1088c        | cmpacna(c)      | CMP-N-acetylneuraminate                                        | Cytosol     |
| 320 | 4189c        | cmpntm2amep(c)  | CMP-N-trimethyl-2-aminoethylphosphonate                        | Cytosol     |
| 321 | 7644c        | cmusa(c)        | 2-Amino-3-carboxymuconate semialdehyde                         | Cytosol     |
| 322 | 12152c       | co(c)           | Carbon monoxide                                                | Cytosol     |
| 323 | 474c         | co2(c)          | CO2                                                            | Cytosol     |
| 324 | 473c         | coa(c)          | Coenzyme A                                                     | Cytosol     |
| 325 | 4331c        | coumarin(c)     | coumarin                                                       | Cytosol     |
| 326 | 2442c        | cpppg3(c)       | Coproporphyrinogen III                                         | Cytosol     |
| 327 | 150c         | creat(c)        | Creatine                                                       | Cytosol     |
| 328 | 19478c       | crm_hs(c)       | ceramide (homo sapiens)                                        | Cytosol     |
| 329 | 2222c        | crmp_hs(c)      | Ceramide 1-phosphate                                           | Cytosol     |
| 330 | 163c         | crn(c)          | L-Carnitine                                                    | Cytosol     |
| 331 | 643c         | crtn(c)         | Creatinine                                                     | Cytosol     |
| 332 | 11268c       | crtsl(c)        | Cortisol                                                       | Cytosol     |
| 333 | 1737c        | crtstrn(c)      | Corticosterone                                                 | Cytosol     |
| 334 | 11891c       | crvnc(c)        | cervonic acid, C22:6 n-3                                       | Cytosol     |
| 335 | 212c         | csn(c)          | Cytosine                                                       | Cytosol     |
| 336 | 338c         | ctp(c)          | CTP                                                            | Cytosol     |
| 337 | 245c         | cyan(c)         | Hydrogen cyanide                                               | Cytosol     |
| 338 | 1062c        | cys-L(c)        | L-Cysteine                                                     | Cytosol     |
| 339 | 14975c       | cysam(c)        | Cysteamine                                                     | Cytosol     |
| 340 | 1150c        | cyst-L(c)       | L-Cystathionine                                                | Cytosol     |
| 341 | 92c          | cytd(c)         | Cytidine                                                       | Cytosol     |
| 342 | 380c         | dad-2(c)        | Deoxyadenosine                                                 | Cytosol     |
| 343 | 265c         | dadp(c)         | dADP                                                           | Cytosol     |
| 344 | 18537c       | dag_hs(c)       | diacylglycerol (homo sapiens)                                  | Cytosol     |



| Row | Metabolite # | Abbreviation        | Metabolite Name                                                           | Compartment |
|-----|--------------|---------------------|---------------------------------------------------------------------------|-------------|
| 345 | 19362c       | dak2gpe_hs(c)       | 1-alkenyl 2-acylglycerol 3-phosphoethanolamine plasmalogen (homo sapiens) | Cytosol     |
| 346 | 193c         | damp(c)             | dAMP                                                                      | Cytosol     |
| 347 | 1091c        | datp(c)             | dATP                                                                      | Cytosol     |
| 348 | 3803c        | dcacoa(c)           | Decanoyl-CoA (n-C10:0CoA)                                                 | Cytosol     |
| 349 | 2908c        | dcamp(c)            | N6-(1,2-Dicarboxyethyl)-AMP                                               | Cytosol     |
| 350 | 5272c        | dcdp(c)             | dCDP                                                                      | Cytosol     |
| 351 | 290c         | dcmp(c)             | dCMP                                                                      | Cytosol     |
| 352 | 18466c       | dcsptn1(c)          | docosa-4,7,10,13,16-pentaenoic acid (n-6)                                 | Cytosol     |
| 353 | 18487c       | dcsptn1coa(c)       | docosa-4,7,10,13,16-pentaenoyl coenzyme A                                 | Cytosol     |
| 354 | 25989c       | dcsptn1crn(c)       | docosa-4,7,10,13,16-pentaenoyl carnitine                                  | Cytosol     |
| 355 | 78c          | dctp(c)             | dCTP                                                                      | Cytosol     |
| 356 | 10918c       | dcyt(c)             | Deoxycytidine                                                             | Cytosol     |
| 357 | 1919c        | ddca(c)             | Dodecanoate (n-C12:0)                                                     | Cytosol     |
| 358 | 10497c       | ddcaACP(c)          | Dodecanoyl-ACP (n-C12:0ACP)                                               | Cytosol     |
| 359 | 1383c        | ddcacoa(c)          | Dodecanoyl-CoA (n-C12:0CoA)                                               | Cytosol     |
| 360 | 20408c       | debrisoquine(c)     | debrisoquine                                                              | Cytosol     |
| 361 | 12883c       | decdp(c)            | all trans Decaprenyl diphosphate                                          | Cytosol     |
| 362 | 15096c       | dedol_L(c)          | Dehydrodolichol, human liver homolog                                      | Cytosol     |
| 363 | 15100c       | dedol_U(c)          | Dehydrodolichol, human uterine homolog                                    | Cytosol     |
| 364 | 15085c       | dedoldp_L(c)        | Dehydrodolichol diphosphate, human liver homolog                          | Cytosol     |
| 365 | 15086c       | dedoldp_U(c)        | Dehydrodolichol diphosphate, human uterine homolog                        | Cytosol     |
| 366 | 15093c       | dedolp_L(c)         | Dehydrodolichol phosphate, human liver homolog                            | Cytosol     |
| 367 | 15099c       | dedolp_U(c)         | Dehydrodolichol phosphate, human uterine homolog                          | Cytosol     |
| 368 | 3387c        | dgchol(c)           | Chenodeoxyglycocholate                                                    | Cytosol     |
| 369 | 194c         | dgdpc(c)            | dGDP                                                                      | Cytosol     |
| 370 | 195c         | dgmpp(c)            | dGMP                                                                      | Cytosol     |
| 371 | 172c         | dgsn(c)             | Deoxyguanosine                                                            | Cytosol     |
| 372 | 143c         | dgtpp(c)            | dGTP                                                                      | Cytosol     |
| 373 | 251c         | dha(c)              | Dihydroxyacetone                                                          | Cytosol     |
| 374 | 1072c        | dhap(c)             | Dihydroxyacetone phosphate                                                | Cytosol     |
| 375 | 133c         | dhbpt(c)            | 6,7-Dihydrobiopterin                                                      | Cytosol     |
| 376 | 19477c       | dhcrm_hs(c)         | dihydroceramide (homo sapiens)                                            | Cytosol     |
| 377 | 421c         | dhdascb(c)          | Dehydroascorbate                                                          | Cytosol     |
| 378 | 956c         | dhea(c)             | Dehydroepiandrosterone                                                    | Cytosol     |
| 379 | 3998c        | dheas(c)            | Dehydroepiandrosterone sulfate                                            | Cytosol     |
| 380 | 10505c       | dhf(c)              | 7,8-Dihydrofolate                                                         | Cytosol     |
| 381 | 177c         | dhor-S(c)           | (S)-Dihydroorotate                                                        | Cytosol     |
| 382 | 1032c        | didp(c)             | dIDP                                                                      | Cytosol     |
| 383 | 4544c        | digalsgalside_hs(c) | Digalactosylceramidesulfate                                               | Cytosol     |
| 384 | 19810c       | digalside_hs(c)     | Digalactosylceramide                                                      | Cytosol     |
| 385 | 9639c        | dimp(c)             | dIMP                                                                      | Cytosol     |
| 386 | 3417c        | din(c)              | Deoxyinosine                                                              | Cytosol     |
| 387 | 1033c        | ditp(c)             | dITP                                                                      | Cytosol     |
| 388 | 8766c        | dkmpp(c)            | 2,3-diketo-5-methylthio-1-phosphopentane                                  | Cytosol     |
| 389 | 2431c        | dlnlca(c)           | dihomo-gamma-linolenic acid (n-6)                                         | Cytosol     |
| 390 | 18491c       | dlnlccoa(c)         | dihomo-gamma-linolenyl coenzyme A                                         | Cytosol     |
| 391 | 25979c       | dlnlcgrn(c)         | dihomo-gamma-linolenyl carnitine                                          | Cytosol     |

| Row | Metabolite # | Abbreviation    | Metabolite Name                                                      | Compartment |
|-----|--------------|-----------------|----------------------------------------------------------------------|-------------|
| 392 | 20407c       | dmantipyrine(c) | demethylated antipyrine                                              | Cytosol     |
| 393 | 840c         | dmgly(c)        | N,N-Dimethylglycine                                                  | Cytosol     |
| 394 | 21977c       | dmhptcoa(c)     | 2,6 dimethylheptanoyl-CoA                                            | Cytosol     |
| 395 | 26488c       | dmhptcrn(c)     | 2,6 dimethylheptanoyl carnitine                                      | Cytosol     |
| 396 | 21959c       | dmnoncoa(c)     | 4,8 dimethylnonanoyl-CoA                                             | Cytosol     |
| 397 | 38c          | dmpp(c)         | Dimethylallyl diphosphate                                            | Cytosol     |
| 398 | 724c         | dnad(c)         | Deamino-NAD+                                                         | Cytosol     |
| 399 | 14992c       | dolglcp_L(c)    | Dolichyl beta-D-glucosyl phosphate, human liver homolog              | Cytosol     |
| 400 | 14993c       | dolglcp_U(c)    | Dolichyl beta-D-glucosyl phosphate, human uterine homolog            | Cytosol     |
| 401 | 14986c       | dolichol_L(c)   | Dolichol, human liver homolog                                        | Cytosol     |
| 402 | 14987c       | dolichol_U(c)   | Dolichol, human uterine homolog                                      | Cytosol     |
| 403 | 14994c       | dolmanp_L(c)    | Dolichyl phosphate D-mannose, human liver homolog                    | Cytosol     |
| 404 | 14995c       | dolmanp_U(c)    | Dolichyl phosphate D-mannose, human uterine homolog                  | Cytosol     |
| 405 | 14988c       | dolp_L(c)       | Dolichol phosphate, human liver homolog                              | Cytosol     |
| 406 | 14989c       | dolp_U(c)       | Dolichol phosphate, human uterine homolog                            | Cytosol     |
| 407 | 2882c        | dopa(c)         | Dopamine                                                             | Cytosol     |
| 408 | 11025c       | dopaqn(c)       | Dopaquinone                                                          | Cytosol     |
| 409 | 21114c       | dopasf(c)       | Dopamine 3-O-sulfate                                                 | Cytosol     |
| 410 | 737c         | dpcoa(c)        | Dephospho-CoA                                                        | Cytosol     |
| 411 | 1462c        | drib(c)         | Deoxyribose                                                          | Cytosol     |
| 412 | 196c         | dtdp(c)         | dTDP                                                                 | Cytosol     |
| 413 | 453c         | dtdp4d6dg(c)    | dTDP-4-dehydro-6-deoxy-D-glucose                                     | Cytosol     |
| 414 | 11394c       | dtdp4d6dm(c)    | dTDP-4-dehydro-6-deoxy-L-mannose                                     | Cytosol     |
| 415 | 712c         | dtdpglu(c)      | dTDPglucose                                                          | Cytosol     |
| 416 | 2288c        | dtdprmn(c)      | dTDP-L-rhamnose                                                      | Cytosol     |
| 417 | 197c         | dtmp(c)         | dTMP                                                                 | Cytosol     |
| 418 | 132c         | dtc(c)          | Dithiothreitol                                                       | Cytosol     |
| 419 | 10551c       | dttoX(c)        | Oxidized dithiothreitol                                              | Cytosol     |
| 420 | 79c          | dttp(c)         | dTTP                                                                 | Cytosol     |
| 421 | 1034c        | dudp(c)         | dUDP                                                                 | Cytosol     |
| 422 | 198c         | dump(c)         | dUMP                                                                 | Cytosol     |
| 423 | 355c         | duri(c)         | Deoxyuridine                                                         | Cytosol     |
| 424 | 80c          | dutp(c)         | dUTP                                                                 | Cytosol     |
| 425 | 18064c       | dxtrn(c)        | phosphorylase-limit dextrin (glycogenin-1,6{4[1,4-Glc], 4[1,4-Glc]}) | Cytosol     |
| 426 | 8301c        | e4hglu(c)       | L-erythro-4-Hydroxyglutamate                                         | Cytosol     |
| 427 | 10791c       | e4p(c)          | D-Erythrose 4-phosphate                                              | Cytosol     |
| 428 | 20414c       | eaflatoxin(c)   | 8,9 epxoy aflatoxin B1                                               | Cytosol     |
| 429 | 20367c       | ebastine(c)     | ebastine                                                             | Cytosol     |
| 430 | 20368c       | ebastineoh(c)   | hydroxylated ebastine                                                | Cytosol     |
| 431 | 18506c       | eicostet(c)     | eicosatetranoic acid                                                 | Cytosol     |
| 432 | 18507c       | eicostetcoa(c)  | eicosatetranoyl coenzyme A                                           | Cytosol     |
| 433 | 25980c       | eicostetcrn(c)  | Eicosatetranoyl carnitine                                            | Cytosol     |
| 434 | 588c         | elaid(c)        | elaidic acid                                                         | Cytosol     |
| 435 | 25972c       | elaidcrn(c)     | Elaidic carnitine                                                    | Cytosol     |
| 436 | 1653c        | eryth(c)        | L-Erythrulose                                                        | Cytosol     |
| 437 | 706c         | estradiol(c)    | Estradiol                                                            | Cytosol     |
| 438 | 20817c       | estradiolglc(c) | estradiol glucuronide                                                | Cytosol     |
| 439 | 3904c        | estriol(c)      | estriol                                                              | Cytosol     |

| Row | Metabolite # | Abbreviation                                       | Metabolite Name                                            | Compartment |
|-----|--------------|----------------------------------------------------|------------------------------------------------------------|-------------|
| 440 | 3415c        | estriolglc(c)                                      | 16-Glucuronide-estriol                                     | Cytosol     |
| 441 | 86c          | estrone(c)                                         | Estrone                                                    | Cytosol     |
| 442 | 20814c       | estroneglc(c)                                      | estrone glucuronide                                        | Cytosol     |
| 443 | 2601c        | estrones(c)                                        | Estrone 3-sulfate                                          | Cytosol     |
| 444 | 254c         | etha(c)                                            | Ethanolamine                                               | Cytosol     |
| 445 | 9020c        | ethamp(c)                                          | Ethanolamine phosphate                                     | Cytosol     |
| 446 | 87c          | etoh(c)                                            | Ethanol                                                    | Cytosol     |
| 447 | 2235c        | f1p(c)                                             | D-Fructose 1-phosphate                                     | Cytosol     |
| 448 | 441c         | f26bp(c)                                           | D-Fructose 2,6-bisphosphate                                | Cytosol     |
| 449 | 4165c        | f5hoxkyn(c)                                        | Formyl-5-hydroxykynurenamine                               | Cytosol     |
| 450 | 1053c        | f6p(c)                                             | D-Fructose 6-phosphate                                     | Cytosol     |
| 451 | 478c         | fad(c)                                             | Flavin adenine dinucleotide oxidized                       | Cytosol     |
| 452 | 42c          | fadh2(c)                                           | Flavin adenine dinucleotide reduced                        | Cytosol     |
| 453 | 340c         | fald(c)                                            | Formaldehyde                                               | Cytosol     |
| 454 | 189c         | fdp(c)                                             | D-Fructose 1,6-bisphosphate                                | Cytosol     |
| 455 | 312c         | fe2(c)                                             | Fe2+                                                       | Cytosol     |
| 456 | 2663c        | fgam(c)                                            | N2-Formyl-N1-(5-phospho-D-ribosyl)glycinamide              | Cytosol     |
| 457 | 336c         | fmn(c)                                             | FMN                                                        | Cytosol     |
| 458 | 4161c        | fna5moxam(c)                                       | Formyl-N-acetyl-5-methoxykynurenamine                      | Cytosol     |
| 459 | 118c         | fol(c)                                             | Folate                                                     | Cytosol     |
| 460 | 334c         | for(c)                                             | Formate                                                    | Cytosol     |
| 461 | 430c         | forglu(c)                                          | N-Formimidoyl-L-glutamate                                  | Cytosol     |
| 462 | 11122c       | formcoa(c)                                         | Formyl-CoA                                                 | Cytosol     |
| 463 | 3319c        | fpram(c)                                           | 2-(Formamido)-N1-(5-phospho-D-ribosyl)acetamide            | Cytosol     |
| 464 | 3486c        | fprica(c)                                          | 5-Formamido-1-(5-phospho-D-ribosyl)imidazole-4-carboxamide | Cytosol     |
| 465 | 10388c       | frdp(c)                                            | Farnesyl diphosphate                                       | Cytosol     |
| 466 | 1061c        | fru(c)                                             | D-Fructose                                                 | Cytosol     |
| 467 | 833c         | fuc-L(c)                                           | L-Fucose                                                   | Cytosol     |
| 468 | 22691c       | fuc13galacglgal14acglgalgluside_hs(c)              | III3Fuc-nLc6Cer                                            | Cytosol     |
| 469 | 22658c       | fuc14galacglgalgluside_hs(c)                       | Lea glycolipid                                             | Cytosol     |
| 470 | 2240c        | fuc1p-L(c)                                         | L-Fucose 1-phosphate                                       | Cytosol     |
| 471 | 22657c       | fucacgalfucgalacglcggluside_hs(c)                  | (Gal)2 (GalNAc)1 (Glc)1 (GlcNAc)1 (LFuc)2 (Cer)1           | Cytosol     |
| 472 | 22663c       | fucacngal14acglgalgluside_hs(c)                    | IV3-a-NeuAc,III3-a-Fuc-nLc4Cer                             | Cytosol     |
| 473 | 22655c       | fucacngalacglgalgluside_hs(c)                      | IV3-a-Neu5Ac,III4-a-Fuc-Lc4Cer                             | Cytosol     |
| 474 | 22665c       | fucfuc12gal14acglgalgluside_hs(c)                  | Ley glycolipid                                             | Cytosol     |
| 475 | 22693c       | fucfuc132galacglgal14acglgalgluside_hs(c)          | V3Fuc,III3Fuc-nLc6Cer                                      | Cytosol     |
| 476 | 22690c       | fucfucfucgalacglc13galacglgal14acglcggluside_hs(c) | (Gal)4 (Glc)1 (GlcNAc)3 (LFuc)3 (Cer)1                     | Cytosol     |

| Row | Metabolite # | Abbreviation                                          | Metabolite Name                            | Compartment |
|-----|--------------|-------------------------------------------------------|--------------------------------------------|-------------|
| 477 | 22685c       | fucfucfucgalacglgal14acglcgalgluside_hs(c)            | (Gal)3 (Glc)1 (GlcNAc)2 (LFuc)3 (Cer)1     | Cytosol     |
| 478 | 22650c       | fucfucgalacglcgalgluside_hs(c)                        | Leb glycolipid                             | Cytosol     |
| 479 | 22660c       | fucgal14acglcgalgluside_hs(c)                         | Lacto-N-fucopentaosyl III ceramide         | Cytosol     |
| 480 | 22652c       | fucgalfucgalacglgalgluside_hs(c)                      | (Gal)3 (Glc)1 (GlcNAc)1 (LFuc)2 (Cer)1     | Cytosol     |
| 481 | 19746c       | fucgalgbside_hs(c)                                    | fucosyl galactosylgloboside (homo sapiens) | Cytosol     |
| 482 | 1081c        | fum(c)                                                | Fumarate                                   | Cytosol     |
| 483 | 1066c        | glp(c)                                                | D-Glucose 1-phosphate                      | Cytosol     |
| 484 | 438c         | g3p(c)                                                | Glyceraldehyde 3-phosphate                 | Cytosol     |
| 485 | 444c         | g3pc(c)                                               | sn-Glycero-3-phosphocholine                | Cytosol     |
| 486 | 765c         | g6p(c)                                                | D-Glucose 6-phosphate                      | Cytosol     |
| 487 | 19963c       | gacpail_hs(c)                                         | glucosaminy-acylphosphatidylinositol       | Cytosol     |
| 488 | 1083c        | gal(c)                                                | D-Galactose                                | Cytosol     |
| 489 | 434c         | gal1p(c)                                              | alpha-D-Galactose 1-phosphate              | Cytosol     |
| 490 | 19744c       | galacglcgalgbside_hs(c)                               | Gal-GlcNAc-Gal globoside (homo sapiens)    | Cytosol     |
| 491 | 22670c       | galfuc12gal14acglgalgluside_hs(c)                     | (Gal)3 (Glc)1 (GlcNAc)1 (LFuc)1 (Cer)1     | Cytosol     |
| 492 | 22683c       | galfucgalacglgal14acglcgalgluside_hs(c)               | (Gal)4 (Glc)1 (GlcNAc)2 (LFuc)1 (Cer)1     | Cytosol     |
| 493 | 22676c       | galgalfucfucgalacglcgalacglgal14acglcgalgluside_hs(c) | (Gal)6 (Glc)1 (GlcNAc)3 (LFuc)2 (Cer)1     | Cytosol     |
| 494 | 19735c       | galgalgalthcrm_hs(c)                                  | Gal-Gal-Gal-Gal-Gal-Glc-Cer (homo sapiens) | Cytosol     |
| 495 | 19619c       | galgluside_hs(c)                                      | galactosyl glucosyl ceramide               | Cytosol     |
| 496 | 19614c       | galside_hs(c)                                         | galactocerebroside (homo sapiens)          | Cytosol     |
| 497 | 1377c        | galt(c)                                               | Galactitol                                 | Cytosol     |
| 498 | 171c         | gam(c)                                                | D-Glucosamine                              | Cytosol     |
| 499 | 187c         | gam6p(c)                                              | D-Glucosamine 6-phosphate                  | Cytosol     |
| 500 | 10804c       | gar(c)                                                | N1-(5-Phospho-D-ribose)glycinamide         | Cytosol     |
| 501 | 19624c       | gbside_hs(c)                                          | globoside (homo sapiens)                   | Cytosol     |
| 502 | 10800c       | gcald(c)                                              | Glycolaldehyde                             | Cytosol     |
| 503 | 1554c        | gchola(c)                                             | glycocholate                               | Cytosol     |
| 504 | 19757c       | gd1b2_hs(c)                                           | GD1beta (homo sapiens)                     | Cytosol     |
| 505 | 19754c       | gd1c_hs(c)                                            | GD1c (homo sapiens)                        | Cytosol     |
| 506 | 19759c       | gd3_hs(c)                                             | GD3 (homo sapiens)                         | Cytosol     |
| 507 | 11524c       | gdchola(c)                                            | glycochenodeoxycholate                     | Cytosol     |
| 508 | 321c         | gdp(c)                                                | GDP                                        | Cytosol     |
| 509 | 952c         | gdppdman(c)                                           | GDP-4-dehydro-6-deoxy-D-mannose            | Cytosol     |
| 510 | 168c         | gdpfuc(c)                                             | GDP-L-fucose                               | Cytosol     |
| 511 | 9064c        | gdpmann(c)                                            | GDP-D-mannose                              | Cytosol     |
| 512 | 188c         | ggdp(c)                                               | Geranylgeranyl diphosphate                 | Cytosol     |
| 513 | 18060c       | ggn(c)                                                | primed glycogenin (glycogenin-8[1,4-Glc])  | Cytosol     |
| 514 | 18308c       | glac(c)                                               | D-glucurono-6,3-lactone                    | Cytosol     |
| 515 | 318c         | glc-D(c)                                              | D-Glucose                                  | Cytosol     |

| Row | Metabolite # | Abbreviation    | Metabolite Name                                                 | Compartment |
|-----|--------------|-----------------|-----------------------------------------------------------------|-------------|
| 516 | 632c         | glcr(c)         | D-Glucarate                                                     | Cytosol     |
| 517 | 256c         | glcur(c)        | D-Glucuronate                                                   | Cytosol     |
| 518 | 3887c        | glcur1p(c)      | D-Glucuronate 1-phosphate                                       | Cytosol     |
| 519 | 11299c       | gln-L(c)        | L-Glutamine                                                     | Cytosol     |
| 520 | 313c         | glu-L(c)        | L-Glutamate                                                     | Cytosol     |
| 521 | 761c         | glu5sa(c)       | L-Glutamate 5-semialdehyde                                      | Cytosol     |
| 522 | 443c         | glucys(c)       | gamma-L-Glutamyl-L-cysteine                                     | Cytosol     |
| 523 | 19613c       | gluside_hs(c)   | glucocerebroside (homo sapiens)                                 | Cytosol     |
| 524 | 329c         | glx(c)          | Glyoxylate                                                      | Cytosol     |
| 525 | 323c         | gly(c)          | Glycine                                                         | Cytosol     |
| 526 | 393c         | glyald(c)       | D-Glyceraldehyde                                                | Cytosol     |
| 527 | 503c         | glyb(c)         | Glycine betaine                                                 | Cytosol     |
| 528 | 1077c        | glyc(c)         | Glycerol                                                        | Cytosol     |
| 529 | 306c         | glyc-R(c)       | (R)-Glycerate                                                   | Cytosol     |
| 530 | 18741c       | glyc-S(c)       | (S)-Glycerate                                                   | Cytosol     |
| 531 | 55c          | glyc3p(c)       | Glycerol 3-phosphate                                            | Cytosol     |
| 532 | 237c         | glyclt(c)       | Glycolate                                                       | Cytosol     |
| 533 | 18061c       | glygn1(c)       | glycogen, structure 1 (glycogenin-11[1,4-Glc])                  | Cytosol     |
| 534 | 18062c       | glygn2(c)       | glycogen, structure 2 (glycogenin-1,6-{7[1,4-Glc], 4[1,4-Glc]}) | Cytosol     |
| 535 | 18071c       | glygn3(c)       | glycogen, structure 3 (glycogenin-7[1,4-Glc])                   | Cytosol     |
| 536 | 226c         | gmp(c)          | GMP                                                             | Cytosol     |
| 537 | 19768c       | gp1c_hs(c)      | GP1c (homo sapiens)                                             | Cytosol     |
| 538 | 19976c       | gp1calpha_hs(c) | GP1c alpha (homo sapiens)                                       | Cytosol     |
| 539 | 3238c        | gpail_hs(c)     | D-glucosaminylphosphatidylinositol                              | Cytosol     |
| 540 | 19763c       | gq1b_hs(c)      | GQ1b (homo sapiens)                                             | Cytosol     |
| 541 | 19771c       | gq1balpha_hs(c) | GQ1balpha (homo sapiens)                                        | Cytosol     |
| 542 | 179c         | grdp(c)         | Geranyl diphosphate                                             | Cytosol     |
| 543 | 5279c        | gsn(c)          | Guanosine                                                       | Cytosol     |
| 544 | 19749c       | gt1a_hs(c)      | GT1a (homo sapiens)                                             | Cytosol     |
| 545 | 19764c       | gt3_hs(c)       | GT3 (homo sapiens)                                              | Cytosol     |
| 546 | 1087c        | gthox(c)        | Oxidized glutathione                                            | Cytosol     |
| 547 | 11388c       | gthrd(c)        | Reduced glutathione                                             | Cytosol     |
| 548 | 327c         | gtp(c)          | GTP                                                             | Cytosol     |
| 549 | 291c         | gua(c)          | Guanine                                                         | Cytosol     |
| 550 | 10039c       | gudac(c)        | Guanidinoacetate                                                | Cytosol     |
| 551 | 677c         | gullac(c)       | L-Gulono-1,4-lactone                                            | Cytosol     |
| 552 | 650c         | guln(c)         | L-Gulonate                                                      | Cytosol     |
| 553 | 1049c        | h(c)            | H+                                                              | Cytosol     |
| 554 | 3c           | h2co3(c)        | carbonic acid                                                   | Cytosol     |
| 555 | 317c         | h2o(c)          | H2O                                                             | Cytosol     |
| 556 | 315c         | h2o2(c)         | Hydrogen peroxide                                               | Cytosol     |
| 557 | 7643c        | hLkynr(c)       | 3-Hydroxy-L-kynurenine                                          | Cytosol     |
| 558 | 144c         | hco3(c)         | Bicarbonate                                                     | Cytosol     |
| 559 | 20383c       | hcoumarin(c)    | hydroxy coumarin                                                | Cytosol     |
| 560 | 3844c        | hcys-L(c)       | L-Homocysteine                                                  | Cytosol     |
| 561 | 297c         | hdca(c)         | Hexadecanoate (n-C16:0)                                         | Cytosol     |
| 562 | 5725c        | hdcea(c)        | Hexadecenoate (n-C16:1)                                         | Cytosol     |
| 563 | 21857c       | hdcecrn(c)      | Hexadecenoyl carnitine                                          | Cytosol     |
| 564 | 8780c        | hdcoa(c)        | Hexadecenoyl-CoA (n-C16:1CoA)                                   | Cytosol     |
| 565 | 3801c        | hdd2coa(c)      | trans-Hexadec-2-enoyl-CoA                                       | Cytosol     |
| 566 | 26402c       | hdd2crn(c)      | trans-Hexadec-2-enoyl carnitine                                 | Cytosol     |

| Row | Metabolite # | Abbreviation   | Metabolite Name                                                           | Compartment |
|-----|--------------|----------------|---------------------------------------------------------------------------|-------------|
| 567 | 10496c       | hdeACP(c)      | cis-hexadec-9-enoyl-[acyl-carrier protein] (n-C16:1)                      | Cytosol     |
| 568 | 20384c       | hestratriol(c) | 4,17 dihydroxy estradiol                                                  | Cytosol     |
| 569 | 9242c        | hexc(c)        | hexacosanoate (n-C26:0)                                                   | Cytosol     |
| 570 | 11013c       | hexccoa(c)     | Hexacosanoyl-CoA (n-C26:0CoA)                                             | Cytosol     |
| 571 | 25969c       | hexccrn(c)     | hexacosanoyl carnitine                                                    | Cytosol     |
| 572 | 9021c        | hgentis(c)     | Homogentisate                                                             | Cytosol     |
| 573 | 4128c        | hi(c)          | HI                                                                        | Cytosol     |
| 574 | 11120c       | his-L(c)       | L-Histidine                                                               | Cytosol     |
| 575 | 15080c       | hista(c)       | Histamine                                                                 | Cytosol     |
| 576 | 838c         | hmbil(c)       | Hydroxymethylbilane                                                       | Cytosol     |
| 577 | 191c         | hmgcoa(c)      | Hydroxymethylglutaryl-CoA                                                 | Cytosol     |
| 578 | 20400c       | hnifedipine(c) | hydroxy nifedipine                                                        | Cytosol     |
| 579 | 131c         | hom-L(c)       | L-Homoserine                                                              | Cytosol     |
| 580 | 11270c       | homoval(c)     | Homovanillate                                                             | Cytosol     |
| 581 | 6306c        | hpdca(c)       | heptadecanoate                                                            | Cytosol     |
| 582 | 22502c       | hpdccoa(c)     | heptadecanoyl coa                                                         | Cytosol     |
| 583 | 22758c       | hpdccarn(c)    | heptadecanoyl carnitine                                                   | Cytosol     |
| 584 | 242c         | hpyr(c)        | Hydroxypyruvate                                                           | Cytosol     |
| 585 | 20388c       | hretn(c)       | 4 hydroxy retinoic acid                                                   | Cytosol     |
| 586 | 20376c       | htaxol(c)      | hydroxylated taxol                                                        | Cytosol     |
| 587 | 218c         | hxan(c)        | Hypoxanthine                                                              | Cytosol     |
| 588 | 349c         | hypaur(c)      | Hypotaurine                                                               | Cytosol     |
| 589 | 464c         | i(c)           | Iodide                                                                    | Cytosol     |
| 590 | 158c         | icit(c)        | Isocitrate                                                                | Cytosol     |
| 591 | 1125c        | id3acald(c)    | Indole-3-acetaldehyde                                                     | Cytosol     |
| 592 | 5392c        | idour(c)       | L-Iduronate                                                               | Cytosol     |
| 593 | 1067c        | idp(c)         | IDP                                                                       | Cytosol     |
| 594 | 410c         | ile-L(c)       | L-Isoleucine                                                              | Cytosol     |
| 595 | 2132c        | im4ac(c)       | Imidazole-4-acetate                                                       | Cytosol     |
| 596 | 3706c        | im4act(c)      | Imidazole-4-acetaldehyde                                                  | Cytosol     |
| 597 | 1090c        | imp(c)         | IMP                                                                       | Cytosol     |
| 598 | 9022c        | ind3ac(c)      | Indole-3-acetate                                                          | Cytosol     |
| 599 | 223c         | inost(c)       | myo-Inositol                                                              | Cytosol     |
| 600 | 147c         | ins(c)         | Inosine                                                                   | Cytosol     |
| 601 | 534c         | iodine(c)      | Iodine                                                                    | Cytosol     |
| 602 | 1089c        | ipdp(c)        | Isopentenyl diphosphate                                                   | Cytosol     |
| 603 | 1050c        | itp(c)         | ITP                                                                       | Cytosol     |
| 604 | 289c         | k(c)           | potassium                                                                 | Cytosol     |
| 605 | 19184c       | kdn(c)         | 2-keto-3-deoxy-D-glycero-D-galactonic acid                                | Cytosol     |
| 606 | 19185c       | kdn(c)         | 2-keto-3-deoxy-D-glycero-D-galactonic acid 9-phosphate                    | Cytosol     |
| 607 | 10998c       | kynate(c)      | 4-Hydroxy-2-quinolinecarboxylic acid                                      | Cytosol     |
| 608 | 15670c       | l2n2m2mn(c)    | de-Fuc, reducing GlcNAc removed, de-Sia form of PA6 (w/o peptide linkage) | Cytosol     |
| 609 | 304c         | lac-D(c)       | D-Lactate                                                                 | Cytosol     |
| 610 | 10931c       | lac-L(c)       | L-Lactate                                                                 | Cytosol     |
| 611 | 491c         | lald-D(c)      | D-Lactaldehyde                                                            | Cytosol     |
| 612 | 420c         | lald-L(c)      | L-Lactaldehyde                                                            | Cytosol     |
| 613 | 597c         | lanost(c)      | Lanosterol                                                                | Cytosol     |
| 614 | 292c         | lcts(c)        | Lactose                                                                   | Cytosol     |
| 615 | 1082c        | leu-L(c)       | L-Leucine                                                                 | Cytosol     |
| 616 | 755c         | leuktrA4(c)    | Leukotriene A4                                                            | Cytosol     |

| Row | Metabolite # | Abbreviation | Metabolite Name                                                                                 | Compartment |
|-----|--------------|--------------|-------------------------------------------------------------------------------------------------|-------------|
| 617 | 1752c        | leuktrB4(c)  | Leukotriene B4                                                                                  | Cytosol     |
| 618 | 17887c       | leuktrC4(c)  | Leukotriene C4                                                                                  | Cytosol     |
| 619 | 4410c        | leuktrD4(c)  | Leukotriene D4                                                                                  | Cytosol     |
| 620 | 26338c       | leuktrE4(c)  | leukotriene E4                                                                                  | Cytosol     |
| 621 | 26339c       | leuktrF4(c)  | leukotriene F4                                                                                  | Cytosol     |
| 622 | 18473c       | lgnc(c)      | lignoceric acid                                                                                 | Cytosol     |
| 623 | 18490c       | lgnccoa(c)   | lignocericyl coenzyme A                                                                         | Cytosol     |
| 624 | 25968c       | lgncrn(c)    | lignoceryl carnitine                                                                            | Cytosol     |
| 625 | 2477c        | lgt-S(c)     | (R)-S-Lactoylglutathione                                                                        | Cytosol     |
| 626 | 10371c       | limnen(c)    | Limonene                                                                                        | Cytosol     |
| 627 | 11278c       | lipoate(c)   | Lipoate                                                                                         | Cytosol     |
| 628 | 18461c       | lneldc(c)    | linoelaidic acid (all trans C18:2)                                                              | Cytosol     |
| 629 | 22137c       | lneldcACP(c) | linoelaidic acid ACP (all trans)                                                                | Cytosol     |
| 630 | 18482c       | lneldcoa(c)  | linoelaidyl coenzyme A                                                                          | Cytosol     |
| 631 | 25975c       | lneldcrn(c)  | Linoelaidyl carnitine                                                                           | Cytosol     |
| 632 | 11172c       | lnlc(c)      | linoleic acid (all cis C18:2) n-6                                                               | Cytosol     |
| 633 | 22136c       | lnlcACP(c)   | linoleic acid ACP (all cis)                                                                     | Cytosol     |
| 634 | 18481c       | lnlccoa(c)   | linoleic coenzyme A                                                                             | Cytosol     |
| 635 | 25976c       | lnlccrn(c)   | Linoleyl carnitine                                                                              | Cytosol     |
| 636 | 11152c       | lnlnca(c)    | alpha-Linolenic acid, C18:3, n-3                                                                | Cytosol     |
| 637 | 18480c       | lnlncacoa(c) | alpha-Linolenoyl-CoA                                                                            | Cytosol     |
| 638 | 25978c       | lnlnacrn(c)  | alpha-linolenyl carnitine                                                                       | Cytosol     |
| 639 | 5356c        | lnlncg(c)    | gamma-linolenic acid                                                                            | Cytosol     |
| 640 | 2277c        | lnlncgcoa(c) | gamma-linolenoyl-CoA                                                                            | Cytosol     |
| 641 | 25977c       | lnlncgrn(c)  | gamma-linolenyl carnitine                                                                       | Cytosol     |
| 642 | 19382c       | lpchol_hs(c) | lysophosphatidylcholine (homo sapiens)                                                          | Cytosol     |
| 643 | 19998c       | lum3(c)      | Lumisterol 3                                                                                    | Cytosol     |
| 644 | 328c         | lys-L(c)     | L-Lysine                                                                                        | Cytosol     |
| 645 | 4198c        | lyxnt(c)     | L-lyxonate                                                                                      | Cytosol     |
| 646 | 15002c       | m1mpdol_L(c) | alpha-D-mannosyl-beta-D-mannosyl-diacylchitobiosyldiphosphodolichol, human liver homolog        | Cytosol     |
| 647 | 15003c       | m1mpdol_U(c) | alpha-D-mannosyl-beta-D-mannosyl-diacylchitobiosyldiphosphodolichol, human uterine homolog      | Cytosol     |
| 648 | 15672c       | m2mn(c)      | (alpha-D-mannosyl)2-beta-D-mannosyl-N-acetylglucosamine                                         | Cytosol     |
| 649 | 15004c       | m2mpdol_L(c) | (alpha-D-mannosyl)2-beta-D-mannosyl-diacetylchitobiosyldiphosphodolichol, human liver homolog   | Cytosol     |
| 650 | 15005c       | m2mpdol_U(c) | (alpha-D-mannosyl)2-beta-D-mannosyl-diacetylchitobiosyldiphosphodolichol, human uterine homolog | Cytosol     |
| 651 | 15006c       | m3mpdol_L(c) | (alpha-D-mannosyl)3-beta-D-mannosyl-diacetylchitodiphosphodolichol, human liver homolog         | Cytosol     |
| 652 | 15007c       | m3mpdol_U(c) | (alpha-D-mannosyl)3-beta-D-mannosyl-diacetylchitodiphosphodolichol, human uterine homolog       | Cytosol     |
| 653 | 15008c       | m4mpdol_L(c) | (alpha-D-Mannosyl)4-beta-D-mannosyl-diacetylchitobiosyldiphosphodolichol, human liver homolog   | Cytosol     |

| Row | Metabolite # | Abbreviation   | Metabolite Name                                                                                 | Compartment |
|-----|--------------|----------------|-------------------------------------------------------------------------------------------------|-------------|
| 654 | 15009c       | m4mpdol_U(c)   | (alpha-D-Mannosyl)4-beta-D-mannosyl-diacetylchitobiosyldiphosphodolichol, human uterine homolog | Cytosol     |
| 655 | 18539c       | mag_hs(c)      | monoacylglycerol 2 (homo sapiens)                                                               | Cytosol     |
| 656 | 230c         | mal-L(c)       | L-Malate                                                                                        | Cytosol     |
| 657 | 50c          | malACP(c)      | Malonyl-[acyl-carrier protein]                                                                  | Cytosol     |
| 658 | 11267c       | malcoa(c)      | Malonyl-CoA                                                                                     | Cytosol     |
| 659 | 267c         | malt(c)        | Maltose                                                                                         | Cytosol     |
| 660 | 1284c        | malttr(c)      | Maltotriose                                                                                     | Cytosol     |
| 661 | 11018c       | man(c)         | D-Mannose                                                                                       | Cytosol     |
| 662 | 2920c        | man1p(c)       | D-Mannose 1-phosphate                                                                           | Cytosol     |
| 663 | 137c         | man6p(c)       | D-Mannose 6-phosphate                                                                           | Cytosol     |
| 664 | 4139c        | melanin(c)     | Melanin                                                                                         | Cytosol     |
| 665 | 1013c        | melatn(c)      | Melatonin                                                                                       | Cytosol     |
| 666 | 1092c        | meoh(c)        | Methanol                                                                                        | Cytosol     |
| 667 | 11265c       | mepi(c)        | Metanephrine                                                                                    | Cytosol     |
| 668 | 4310c        | mercplac(c)    | 3-Mercaptolactate                                                                               | Cytosol     |
| 669 | 26412c       | mercplaccys(c) | 3-mercaptolactate-cysteine disulfide                                                            | Cytosol     |
| 670 | 794c         | mercppy(c)     | Mercaptopyruvate                                                                                | Cytosol     |
| 671 | 343c         | met-L(c)       | L-Methionine                                                                                    | Cytosol     |
| 672 | 433c         | methf(c)       | 5,10-Methenyltetrahydrofolate                                                                   | Cytosol     |
| 673 | 3703c        | mhista(c)      | N-Methylhistamine                                                                               | Cytosol     |
| 674 | 996c         | mi13456p(c)    | 1D-myo-Inositol 1,3,4,5,6-pentakisphosphate                                                     | Cytosol     |
| 675 | 7140c        | mi1345p(c)     | 1D-myo-Inositol 1,3,4,5-tetrakisphosphate                                                       | Cytosol     |
| 676 | 11398c       | mi1346p(c)     | 1D-myo-Inositol 1,3,4,6-tetrakisphosphate                                                       | Cytosol     |
| 677 | 969c         | mi134p(c)      | 1D-myo-Inositol 1,3,4-trisphosphate                                                             | Cytosol     |
| 678 | 3100c        | mi13p(c)       | 1D-myo-Inositol 1,3-bisphosphate                                                                | Cytosol     |
| 679 | 8995c        | mi145p(c)      | 1D-myo-Inositol 1,4,5-trisphosphate                                                             | Cytosol     |
| 680 | 950c         | mi14p(c)       | 1D-myo-Inositol 1,4-bisphosphate                                                                | Cytosol     |
| 681 | 8983c        | mi1p-D(c)      | 1D-myo-Inositol 1-phosphate                                                                     | Cytosol     |
| 682 | 3981c        | mi3456p(c)     | 1D-myo-Inositol 3,4,5,6-tetrakisphosphate                                                       | Cytosol     |
| 683 | 10518c       | mi34p(c)       | 1D-myo-Inositol 3,4-bisphosphate                                                                | Cytosol     |
| 684 | 2866c        | mi3p-D(c)      | 1D-myo-Inositol 3-phosphate                                                                     | Cytosol     |
| 685 | 11166c       | mi4p-D(c)      | 1D-myo-Inositol 4-phosphate                                                                     | Cytosol     |
| 686 | 3284c        | micit(c)       | methylisocitrate                                                                                | Cytosol     |
| 687 | 938c         | minohp(c)      | myo-Inositol hexakisphosphate                                                                   | Cytosol     |
| 688 | 11043c       | mlthf(c)       | 5,10-Methylenetetrahydrofolate                                                                  | Cytosol     |
| 689 | 13998c       | mma(c)         | monomethylamine                                                                                 | Cytosol     |
| 690 | 451c         | mmcoa-S(c)     | (S)-Methylmalonyl-CoA                                                                           | Cytosol     |
| 691 | 15673c       | mn(c)          | beta-1,4-mannose-N-acetylglucosamine                                                            | Cytosol     |
| 692 | 15000c       | mpdol_L(c)     | beta-D-Mannosyldiacetylchitobiosyldiphosphodolichol, human liver homolog                        | Cytosol     |
| 693 | 15001c       | mpdol_U(c)     | beta-D-Mannosyldiacetylchitobiosyldiphosphodolichol, human uterine homolog                      | Cytosol     |
| 694 | 277c         | msa(c)         | Malonate semialdehyde                                                                           | Cytosol     |
| 695 | 370c         | mthgx(c)       | Methylglyoxal                                                                                   | Cytosol     |
| 696 | 10495c       | myrsACP(c)     | Myristoyl-ACP (n-C14:0ACP)                                                                      | Cytosol     |
| 697 | 15681c       | n2m2nm(c)      | n2m2nmasn (w/o peptide linkage)                                                                 | Cytosol     |
| 698 | 15682c       | n2m2nmn(c)     | reducing GlcNAc removed form of n2m2nmasn (w/o peptide)                                         | Cytosol     |
| 699 | 7923c        | n4abutn(c)     | N4-Acetylaminobutanal                                                                           | Cytosol     |



| Row | Metabolite # | Abbreviation  | Metabolite Name                                                  | Compartment |
|-----|--------------|---------------|------------------------------------------------------------------|-------------|
| 700 | 1023c        | na1(c)        | Sodium                                                           | Cytosol     |
| 701 | 301c         | nac(c)        | Nicotinate                                                       | Cytosol     |
| 702 | 466c         | nad(c)        | Nicotinamide adenine dinucleotide                                | Cytosol     |
| 703 | 467c         | nadh(c)       | Nicotinamide adenine dinucleotide - reduced                      | Cytosol     |
| 704 | 469c         | nadp(c)       | Nicotinamide adenine dinucleotide phosphate                      | Cytosol     |
| 705 | 468c         | nadph(c)      | Nicotinamide adenine dinucleotide phosphate - reduced            | Cytosol     |
| 706 | 14996c       | naglc2p_L(c)  | N-Acetyl-D-glucosaminylidiphosphodolichol, human liver homolog   | Cytosol     |
| 707 | 14997c       | naglc2p_U(c)  | N-Acetyl-D-glucosaminylidiphosphodolichol, human uterine homolog | Cytosol     |
| 708 | 233c         | ncam(c)       | Nicotinamide                                                     | Cytosol     |
| 709 | 4171c        | nformanth(c)  | N-Formylanthranilate                                             | Cytosol     |
| 710 | 476c         | nh4(c)        | Ammonium                                                         | Cytosol     |
| 711 | 10883c       | nicrns(c)     | Nicotinate D-ribonucleoside                                      | Cytosol     |
| 712 | 776c         | nicrnt(c)     | Nicotinate D-ribonucleotide                                      | Cytosol     |
| 713 | 20399c       | nifedipine(c) | nifedipine                                                       | Cytosol     |
| 714 | 77c          | nmn(c)        | NMN                                                              | Cytosol     |
| 715 | 2047c        | nmptrc(c)     | N-Methylputrescine                                               | Cytosol     |
| 716 | 4614c        | nmthsrtn(c)   | N-Methylserotonin                                                | Cytosol     |
| 717 | 361c         | no(c)         | Nitric oxide                                                     | Cytosol     |
| 718 | 4127c        | normete-L(c)  | L-Normetanephrine                                                | Cytosol     |
| 719 | 668c         | npthl(c)      | Naphthalene                                                      | Cytosol     |
| 720 | 371c         | nrpphr(c)     | Norepinephrine                                                   | Cytosol     |
| 721 | 21117c       | nrpphrsfc(c)  | Sulfate derivative of norepinephrine                             | Cytosol     |
| 722 | 18464c       | nrvc(c)       | nervonic acid                                                    | Cytosol     |
| 723 | 18485c       | nrvnccoac(c)  | nervonyl coenzyme A                                              | Cytosol     |
| 724 | 25974c       | nrvnccrn(c)   | Nervonyl carnitine                                               | Cytosol     |
| 725 | 5380c        | ntm2amep(c)   | N-Trimethyl-2-aminoethylphosphonate                              | Cytosol     |
| 726 | 4397c        | nwharg(c)     | N-(omega)-Hydroxyarginine                                        | Cytosol     |
| 727 | 470c         | o2(c)         | O2                                                               | Cytosol     |
| 728 | 461c         | o2s(c)        | Superoxide anion                                                 | Cytosol     |
| 729 | 322c         | oaa(c)        | Oxaloacetate                                                     | Cytosol     |
| 730 | 20055c       | oagd3_hs(c)   | 9-O-Acetylated GD3 (homo sapiens)                                | Cytosol     |
| 731 | 20056c       | oagt3_hs(c)   | 9-O-Acetylated GT3 (homo sapiens)                                | Cytosol     |
| 732 | 10688c       | occoa(c)      | Octanoyl-CoA (n-C8:0CoA)                                         | Cytosol     |
| 733 | 1249c        | ocdca(c)      | octadecanoate (n-C18:0)                                          | Cytosol     |
| 734 | 5936c        | ocdcaACP(c)   | Octadecanoyl-ACP (n-C18:0ACP)                                    | Cytosol     |
| 735 | 8769c        | ocdcea(c)     | octadecenoate (n-C18:1)                                          | Cytosol     |
| 736 | 8770c        | ocdcya(c)     | octadecadienoate (n-C18:2)                                       | Cytosol     |
| 737 | 8790c        | ocdcyaACP(c)  | Octadecynoyl-ACP (n-C18:2ACP)                                    | Cytosol     |
| 738 | 5354c        | octa(c)       | octanoate (n-C8:0)                                               | Cytosol     |
| 739 | 5871c        | octeACP(c)    | cis-octadec-11-enoyl-[acyl-carrier protein] (n-C18:1)            | Cytosol     |
| 740 | 8401c        | od2coa(c)     | trans-Octadec-2-enoyl-CoA                                        | Cytosol     |
| 741 | 8782c        | odecoa(c)     | Octadecenoyl-CoA (n-C18:1CoA)                                    | Cytosol     |
| 742 | 11885c       | odecrn(c)     | octadecenoyl carnitine                                           | Cytosol     |
| 743 | 1021c        | oh1(c)        | hydroxide ion                                                    | Cytosol     |
| 744 | 20404c       | omeprazole(c) | omeprazole                                                       | Cytosol     |
| 745 | 20401c       | onpthl(c)     | naphthalene epoxide                                              | Cytosol     |
| 746 | 22810c       | oretn(c)      | 4-oxo-retonoic acid                                              | Cytosol     |
| 747 | 1304c        | orn(c)        | Ornithine                                                        | Cytosol     |
| 748 | 148c         | orot(c)       | Orotate                                                          | Cytosol     |

| Row | Metabolite # | Abbreviation   | Metabolite Name                                           | Compartment |
|-----|--------------|----------------|-----------------------------------------------------------|-------------|
| 749 | 881c         | orot5p(c)      | Orotidine 5'-phosphate                                    | Cytosol     |
| 750 | 10901c       | oxa(c)         | Oxalate                                                   | Cytosol     |
| 751 | 18536c       | pa_hs(c)       | phosphatidic acid (homo sapiens)                          | Cytosol     |
| 752 | 9657c        | pac(c)         | Phenylacetic acid                                         | Cytosol     |
| 753 | 1100c        | pacald(c)      | Phenylacetaldehyde                                        | Cytosol     |
| 754 | 19365c       | paf_hs(c)      | 1-alkyl 2-acteylglycerol 3-phosphocholine (homo sapiens)  | Cytosol     |
| 755 | 4431c        | pail345p_hs(c) | phosphatidylinositol-3,4,5-trisphosphate (Homo sapiens)   | Cytosol     |
| 756 | 19605c       | pail34p_hs(c)  | phosphatidylinositol-3,4-bisphosphate (Homo sapiens)      | Cytosol     |
| 757 | 19704c       | pail35p_hs(c)  | phosphatidylinositol-3,5-bisphosphate (Homo sapiens)      | Cytosol     |
| 758 | 3992c        | pail3p_hs(c)   | 1-Phosphatidyl-1D-myo-inositol 3-phosphate (Homo sapiens) | Cytosol     |
| 759 | 19333c       | pail45p_hs(c)  | phosphatidylinositol 4,5-bisphosphate (Homo sapiens)      | Cytosol     |
| 760 | 19332c       | pail4p_hs(c)   | 1-Phosphatidyl-1D-myo-inositol 4-phosphate (Homo sapiens) | Cytosol     |
| 761 | 19479c       | pail5p_hs(c)   | 1-Phosphatidyl-1D-myo-inositol 5-phosphate (Homo sapiens) | Cytosol     |
| 762 | 19327c       | pail_hs(c)     | phosphatidylinositol (homo sapiens)                       | Cytosol     |
| 763 | 5870c        | palACP(c)      | Palmitoyl-ACP (n-C16:0ACP)                                | Cytosol     |
| 764 | 900c         | pan4p(c)       | Pantetheine 4'-phosphate                                  | Cytosol     |
| 765 | 333c         | pap(c)         | Adenosine 3',5'-bisphosphate                              | Cytosol     |
| 766 | 332c         | paps(c)        | 3'-Phosphoadenylyl sulfate                                | Cytosol     |
| 767 | 19051c       | pchol_hs(c)    | Phosphatidylcholine (homo sapiens)                        | Cytosol     |
| 768 | 7124c        | pcollg5hlys(c) | Procollagen 5-hydroxy-L-lysine                            | Cytosol     |
| 769 | 2265c        | pcollglys(c)   | Procollagen L-lysine                                      | Cytosol     |
| 770 | 10038c       | pcreat(c)      | Phosphocreatine                                           | Cytosol     |
| 771 | 15675c       | pcrn(c)        | propionyl-carnitine                                       | Cytosol     |
| 772 | 19999c       | pd3(c)         | Previtamin D3                                             | Cytosol     |
| 773 | 1116c        | pdx5p(c)       | Pyridoxine 5'-phosphate                                   | Cytosol     |
| 774 | 19050c       | pe_hs(c)       | phosphatidylethanolamine (homo sapiens)                   | Cytosol     |
| 775 | 9637c        | peamn(c)       | Phenethylamine                                            | Cytosol     |
| 776 | 344c         | pep(c)         | Phosphoenolpyruvate                                       | Cytosol     |
| 777 | 19700c       | peracd(c)      | Perillic acid                                             | Cytosol     |
| 778 | 2536c        | perillyl(c)    | Perillyl alcohol                                          | Cytosol     |
| 779 | 19385c       | pglyc_hs(c)    | phosphatidylglycerol (homo sapiens)                       | Cytosol     |
| 780 | 19384c       | pgp_hs(c)      | phosphatidyl glycerol phosphate (homo sapiens)            | Cytosol     |
| 781 | 397c         | phaccoa(c)     | Phenylacetyl-CoA                                          | Cytosol     |
| 782 | 1048c        | phe-L(c)       | L-Phenylalanine                                           | Cytosol     |
| 783 | 2972c        | pheacgln(c)    | alpha-N-Phenylacetyl-L-glutamine                          | Cytosol     |
| 784 | 11520c       | pheme(c)       | Protoheme                                                 | Cytosol     |
| 785 | 10564c       | phom(c)        | O-Phospho-L-homoserine                                    | Cytosol     |
| 786 | 240c         | phpyr(c)       | Phenylpyruvate                                            | Cytosol     |
| 787 | 10509c       | phyQ(c)        | Phylloquinone                                             | Cytosol     |
| 788 | 1308c        | phyt(c)        | phytanic acid                                             | Cytosol     |
| 789 | 21953c       | phytcoa(c)     | phytanyl coa                                              | Cytosol     |
| 790 | 472c         | pi(c)          | Phosphate                                                 | Cytosol     |
| 791 | 11029c       | pmtcoa(c)      | Palmitoyl-CoA (n-C16:0CoA)                                | Cytosol     |
| 792 | 2244c        | pmtcrn(c)      | L-Palmitoylcarnitine                                      | Cytosol     |
| 793 | 10928c       | pnto-R(c)      | (R)-Pantothenate                                          | Cytosol     |

| Row | Metabolite # | Abbreviation      | Metabolite Name                                  | Compartment |
|-----|--------------|-------------------|--------------------------------------------------|-------------|
| 794 | 238c         | ppa(c)            | Propionate (n-C3:0)                              | Cytosol     |
| 795 | 487c         | ppbng(c)          | Porphobilinogen                                  | Cytosol     |
| 796 | 1064c        | ppcoa(c)          | Propanoyl-CoA                                    | Cytosol     |
| 797 | 475c         | ppi(c)            | Diphosphate                                      | Cytosol     |
| 798 | 19580c       | ppmi12346p(c)     | 5-Diphosphoinositol pentakisphosphate            | Cytosol     |
| 799 | 19581c       | ppmi1346p(c)      | Diphosphoinositol tetrakisphosphate              | Cytosol     |
| 800 | 864c         | pppg9(c)          | Protoporphyrinogen IX                            | Cytosol     |
| 801 | 2452c        | pppi(c)           | Inorganic triphosphate                           | Cytosol     |
| 802 | 2325c        | pram(c)           | 5-Phospho-beta-D-ribosylamine                    | Cytosol     |
| 803 | 10681c       | prgnlone(c)       | Pregnenolone                                     | Cytosol     |
| 804 | 26331c       | prgnlones(c)      | pregnenolone sulfate                             | Cytosol     |
| 805 | 10510c       | prgstrn(c)        | Progesterone                                     | Cytosol     |
| 806 | 21954c       | prist(c)          | pristanic acid                                   | Cytosol     |
| 807 | 21957c       | pristanal(c)      | pristanal                                        | Cytosol     |
| 808 | 21955c       | pristcoa(c)       | pristanoyl coa                                   | Cytosol     |
| 809 | 629c         | pro-D(c)          | D-Proline                                        | Cytosol     |
| 810 | 229c         | pro-L(c)          | L-Proline                                        | Cytosol     |
| 811 | 3331c        | prostg1(c)        | (13E)-11 alpha-Hydroxy-9,15-dioxoprost-13-enoate | Cytosol     |
| 812 | 11382c       | prostgd2(c)       | Prostaglandin D2                                 | Cytosol     |
| 813 | 3492c        | prostge1(c)       | Prostaglandin E1                                 | Cytosol     |
| 814 | 398c         | prostge2(c)       | Prostaglandin E2                                 | Cytosol     |
| 815 | 1126c        | prostgf2(c)       | Prostaglandin F2alpha                            | Cytosol     |
| 816 | 422c         | prostgh2(c)       | Prostaglandin H2                                 | Cytosol     |
| 817 | 1078c        | prpp(c)           | 5-Phospho-alpha-D-ribose 1-diphosphate           | Cytosol     |
| 818 | 19052c       | ps_hs(c)          | phosphatidylserine (homo sapiens)                | Cytosol     |
| 819 | 824c         | pser-L(c)         | O-Phospho-L-serine                               | Cytosol     |
| 820 | 6304c        | ptdca(c)          | pentadecanoate                                   | Cytosol     |
| 821 | 22500c       | ptdcacoa(c)       | pentadecanoyl Coenzyme A                         | Cytosol     |
| 822 | 22757c       | ptdcacrn(c)       | pentadenoyl carnitine                            | Cytosol     |
| 823 | 1094c        | ptrc(c)           | Putrescine                                       | Cytosol     |
| 824 | 670c         | pth(c)            | Pantetheine                                      | Cytosol     |
| 825 | 1130c        | pyam5p(c)         | Pyridoxamine 5'-phosphate                        | Cytosol     |
| 826 | 362c         | pydam(c)          | Pyridoxamine                                     | Cytosol     |
| 827 | 298c         | pydx(c)           | Pyridoxal                                        | Cytosol     |
| 828 | 479c         | pydx5p(c)         | Pyridoxal 5'-phosphate                           | Cytosol     |
| 829 | 160c         | pydxn(c)          | Pyridoxine                                       | Cytosol     |
| 830 | 1851c        | pylald(c)         | Perillyl aldehyde                                | Cytosol     |
| 831 | 311c         | pyr(c)            | Pyruvate                                         | Cytosol     |
| 832 | 406c         | q10(c)            | Ubiquinone-10                                    | Cytosol     |
| 833 | 11879c       | q10h2(c)          | Ubiquinol-10                                     | Cytosol     |
| 834 | 2854c        | quln(c)           | Quinolate                                        | Cytosol     |
| 835 | 10390c       | r1p(c)            | alpha-D-Ribose 1-phosphate                       | Cytosol     |
| 836 | 1999c        | r5p(c)            | alpha-D-Ribose 5-phosphate                       | Cytosol     |
| 837 | 156c         | rbl-D(c)          | D-Ribulose                                       | Cytosol     |
| 838 | 91c          | rbt(c)            | Ribitol                                          | Cytosol     |
| 839 | 22806c       | retfa(c)          | fatty acid retinol                               | Cytosol     |
| 840 | 208c         | retinal(c)        | Retinal                                          | Cytosol     |
| 841 | 19631c       | retinal-11-cis(c) | cis-11-retinal                                   | Cytosol     |
| 842 | 22820c       | retinal-cis-13(c) | cis-13-retinal                                   | Cytosol     |
| 843 | 19630c       | retinal-cis-9(c)  | cis-9-retinal                                    | Cytosol     |
| 844 | 90c          | retinol(c)        | Retinol                                          | Cytosol     |
| 845 | 19628c       | retinol-9-cis(c)  | 9-cis-retinol                                    | Cytosol     |
| 846 | 19629c       | retinol-cis-11(c) | cis-11-retinol                                   | Cytosol     |

| Row | Metabolite # | Abbreviation      | Metabolite Name                                                   | Compartment |
|-----|--------------|-------------------|-------------------------------------------------------------------|-------------|
| 847 | 22819c       | retinol-cis-13(c) | cis-13-retinol                                                    | Cytosol     |
| 848 | 11153c       | retn(c)           | Retinoate                                                         | Cytosol     |
| 849 | 22809c       | retncoa(c)        | retinoyl CoA                                                      | Cytosol     |
| 850 | 20818c       | retnglc(c)        | retinoyl glucuronide                                              | Cytosol     |
| 851 | 1080c        | rib-D(c)          | D-Ribose                                                          | Cytosol     |
| 852 | 303c         | ribflv(c)         | Riboflavin                                                        | Cytosol     |
| 853 | 2368c        | rnam(c)           | N-Ribosylnicotinamide                                             | Cytosol     |
| 854 | 261c         | ru5p-D(c)         | D-Ribulose 5-phosphate                                            | Cytosol     |
| 855 | 15667c       | s2l2n2m2m(c)      | de-Fuc form of PA6 (w/o peptide linkage)                          | Cytosol     |
| 856 | 15669c       | s2l2n2m2mn(c)     | de-Fuc, reducing GlcNAc removed form of PA6 (w/o peptide linkage) | Cytosol     |
| 857 | 140c         | s7p(c)            | Sedoheptulose 7-phosphate                                         | Cytosol     |
| 858 | 271c         | sarcs(c)          | Sarcosine                                                         | Cytosol     |
| 859 | 645c         | sbt-D(c)          | D-Sorbitol                                                        | Cytosol     |
| 860 | 4207c        | seahcys(c)        | Se-Adenosylselenohomocysteine                                     | Cytosol     |
| 861 | 4301c        | seasmeth(c)       | Se-Adenosylselenomethionine                                       | Cytosol     |
| 862 | 4212c        | sel(c)            | Selenate                                                          | Cytosol     |
| 863 | 4389c        | selcys(c)         | Selenocysteine                                                    | Cytosol     |
| 864 | 4214c        | selcyst(c)        | Selenocystathionine                                               | Cytosol     |
| 865 | 4213c        | selhcys(c)        | Selenohomocysteine                                                | Cytosol     |
| 866 | 3846c        | selmeth(c)        | Selenomethionine                                                  | Cytosol     |
| 867 | 1247c        | seln(c)           | Selenide                                                          | Cytosol     |
| 868 | 3734c        | selnp(c)          | Selenophosphate                                                   | Cytosol     |
| 869 | 512c         | ser-D(c)          | D-Serine                                                          | Cytosol     |
| 870 | 339c         | ser-L(c)          | L-Serine                                                          | Cytosol     |
| 871 | 19615c       | sgalside_hs(c)    | sulfatide galactocerebroside (homo sapiens)                       | Cytosol     |
| 872 | 15786c       | sl-L(c)           | L-sulfolactate                                                    | Cytosol     |
| 873 | 1060c        | so3(c)            | Sulfite                                                           | Cytosol     |
| 874 | 335c         | so4(c)            | Sulfate                                                           | Cytosol     |
| 875 | 26303c       | spc_hs(c)         | sphingosylphosphorylcholine (homo sapiens)                        | Cytosol     |
| 876 | 9025c        | sph1p(c)          | Sphinganine 1-phosphate                                           | Cytosol     |
| 877 | 708c         | sphgn(c)          | Sphinganine                                                       | Cytosol     |
| 878 | 10703c       | sphings(c)        | Sphingosine                                                       | Cytosol     |
| 879 | 19618c       | sphmyln_hs(c)     | sphingomyelin (homo sapiens)                                      | Cytosol     |
| 880 | 4541c        | sphs1p(c)         | Sphingosine 1-phosphate                                           | Cytosol     |
| 881 | 161c         | spmd(c)           | Spermidine                                                        | Cytosol     |
| 882 | 518c         | sprm(c)           | Spermine                                                          | Cytosol     |
| 883 | 638c         | srtn(c)           | Serotonin                                                         | Cytosol     |
| 884 | 8781c        | stcoa(c)          | Stearoyl-CoA (n-C18:0CoA)                                         | Cytosol     |
| 885 | 11884c       | stcrm(c)          | stearoylcarnitine                                                 | Cytosol     |
| 886 | 18462c       | strdnc(c)         | stearidonic acid C18:4, n-3                                       | Cytosol     |
| 887 | 18492c       | strdncoa(c)       | stearidonyl coenzyme A                                            | Cytosol     |
| 888 | 25985c       | strdnccrn(c)      | stearidonyl carnitine                                             | Cytosol     |
| 889 | 325c         | succ(c)           | Succinate                                                         | Cytosol     |
| 890 | 26271c       | tag1p-D(c)        | D-Tagatose 1-phosphate                                            | Cytosol     |
| 891 | 18538c       | tag_hs(c)         | triacylglycerol (homo sapiens)                                    | Cytosol     |
| 892 | 646c         | tagat-D(c)        | D-Tagatose                                                        | Cytosol     |
| 893 | 293c         | taur(c)           | Taurine                                                           | Cytosol     |
| 894 | 20374c       | taxol(c)          | paclitaxel                                                        | Cytosol     |
| 895 | 3700c        | tchola(c)         | taurocholic acid                                                  | Cytosol     |
| 896 | 1428c        | tcynt(c)          | Thiocyanate                                                       | Cytosol     |
| 897 | 3390c        | tdchola(c)        | taurochenodeoxycholate                                            | Cytosol     |
| 898 | 1862c        | tdcoa(c)          | Tetradecanoyl-CoA (n-C14:0CoA)                                    | Cytosol     |

| Row | Metabolite # | Abbreviation     | Metabolite Name                                       | Compartment |
|-----|--------------|------------------|-------------------------------------------------------|-------------|
| 899 | 5939c        | tdeACP(c)        | cis-tetradec-7-enoyl-[acyl-carrier protein] (n-C14:1) | Cytosol     |
| 900 | 18514c       | tethex3(c)       | tetracosahexaenoic acid, n-3                          | Cytosol     |
| 901 | 18515c       | tethex3coa(c)    | tetracosahexaenoyl coenzyme A                         | Cytosol     |
| 902 | 18512c       | tetpent3(c)      | tetracosapentaenoic acid, n-3                         | Cytosol     |
| 903 | 18513c       | tetpent3coa(c)   | tetracosapentaenoyl coenzyme A, n-3                   | Cytosol     |
| 904 | 25991c       | tetpent3crn(c)   | tetracosapentaenoyl carnitine                         | Cytosol     |
| 905 | 18508c       | tetpent6(c)      | tetracosapentaenoic acid, n-6                         | Cytosol     |
| 906 | 18509c       | tetpent6coa(c)   | tetracosapentaenoyl coenzyme A, n-6                   | Cytosol     |
| 907 | 25992c       | tetpent6crn(c)   | tetracosapentaenoyl carnitine                         | Cytosol     |
| 908 | 18510c       | tettet6(c)       | tetracosatetraenoic acid n-6                          | Cytosol     |
| 909 | 18511c       | tettet6coa(c)    | tetracosatetraenoyl coenzyme A                        | Cytosol     |
| 910 | 25986c       | tettet6crn(c)    | Tetracosatetraenoyl carnitine                         | Cytosol     |
| 911 | 135c         | thbpt(c)         | Tetrahydrobiopterin                                   | Cytosol     |
| 912 | 22636c       | thbpt4acam(c)    | Tetrahydrobiopterin-4a-carbinolamine                  | Cytosol     |
| 913 | 19623c       | thcrm_hs(c)      | trihexosyl ceramide (homo sapiens)                    | Cytosol     |
| 914 | 1483c        | thcys(c)         | Thiocysteine                                          | Cytosol     |
| 915 | 1065c        | thf(c)           | 5,6,7,8-Tetrahydrofolate                              | Cytosol     |
| 916 | 210c         | thm(c)           | Thiamin                                               | Cytosol     |
| 917 | 866c         | thmmp(c)         | Thiamin monophosphate                                 | Cytosol     |
| 918 | 341c         | thmpp(c)         | Thiamine diphosphate                                  | Cytosol     |
| 919 | 2271c        | thmtp(c)         | Thiamin triphosphate                                  | Cytosol     |
| 920 | 75c          | thp2c(c)         | 2,3,4,5-Tetrahydropyridine-2-carboxylate              | Cytosol     |
| 921 | 253c         | thr-L(c)         | L-Threonine                                           | Cytosol     |
| 922 | 1481c        | thrnt(c)         | L-Threonate                                           | Cytosol     |
| 923 | 246c         | thym(c)          | Thymine                                               | Cytosol     |
| 924 | 5269c        | thymd(c)         | Thymidine                                             | Cytosol     |
| 925 | 1482c        | thyox-L(c)       | L-Thyroxine                                           | Cytosol     |
| 926 | 2907c        | tmlys(c)         | N6,N6,N6-Trimethyl-L-lysine                           | Cytosol     |
| 927 | 18465c       | tmndnc(c)        | timnodonic acid C20:5, n-3                            | Cytosol     |
| 928 | 18486c       | tmndnccoac(c)    | timnodonyl coenzyme A                                 | Cytosol     |
| 929 | 25988c       | tmndnccrn(c)     | Timnodonyl carnitine                                  | Cytosol     |
| 930 | 20410c       | tolbutamide(c)   | tolbutamide                                           | Cytosol     |
| 931 | 181c         | trdox(c)         | Oxidized thioredoxin                                  | Cytosol     |
| 932 | 180c         | trdrd(c)         | Reduced thioredoxin                                   | Cytosol     |
| 933 | 867c         | tre(c)           | Trehalose                                             | Cytosol     |
| 934 | 2543c        | triodythy(c)     | Triiodothyronine                                      | Cytosol     |
| 935 | 21120c       | triodythysuf(c)  | Triiodothyronine sulfate                              | Cytosol     |
| 936 | 1047c        | trp-L(c)         | L-Tryptophan                                          | Cytosol     |
| 937 | 405c         | trypta(c)        | Tryptamine                                            | Cytosol     |
| 938 | 20000c       | ts3(c)           | Tachysterol 3                                         | Cytosol     |
| 939 | 10622c       | tststerone(c)    | Testosterone                                          | Cytosol     |
| 940 | 20816c       | tststeroneglc(c) | testosterone glucuronide                              | Cytosol     |
| 941 | 26486c       | tststerones(c)   | testosterone sulfate                                  | Cytosol     |
| 942 | 164c         | tsul(c)          | Thiosulfate                                           | Cytosol     |
| 943 | 12382c       | ttc-ggdp(c)      | trans,trans,cis-Geranylgeranyl diphosphate            | Cytosol     |
| 944 | 6302c        | ttcca(c)         | tetradecanoate (n-C14:0)                              | Cytosol     |
| 945 | 8772c        | ttcca(c)         | tetradecenoate (n-C14:1)                              | Cytosol     |
| 946 | 26814c       | ttcrn(c)         | tetradecanoyl carnitine                               | Cytosol     |
| 947 | 1777c        | txa2(c)          | Thromboxane A2                                        | Cytosol     |
| 948 | 100c         | tym(c)           | Tyramine                                              | Cytosol     |
| 949 | 21118c       | tymsf(c)         | Tyramine O-sulfate                                    | Cytosol     |
| 950 | 1051c        | tyr-L(c)         | L-Tyrosine                                            | Cytosol     |

| Row  | Metabolite # | Abbreviation   | Metabolite Name                                   | Compartment    |
|------|--------------|----------------|---------------------------------------------------|----------------|
| 951  | 326c         | uacgam(c)      | UDP-N-acetyl-D-glucosamine                        | Cytosol        |
| 952  | 477c         | udp(c)         | UDP                                               | Cytosol        |
| 953  | 10912c       | udpacgal(c)    | UDP-N-acetyl-D-galactosamine                      | Cytosol        |
| 954  | 316c         | udpg(c)        | UDPglucose                                        | Cytosol        |
| 955  | 331c         | udpgal(c)      | UDPgalactose                                      | Cytosol        |
| 956  | 241c         | udpglcur(c)    | UDP-D-glucuronate                                 | Cytosol        |
| 957  | 255c         | udpxyl(c)      | UDP-D-xylose                                      | Cytosol        |
| 958  | 1068c        | ump(c)         | UMP                                               | Cytosol        |
| 959  | 687c         | uppg3(c)       | Uroporphyrinogen III                              | Cytosol        |
| 960  | 1069c        | ura(c)         | Uracil                                            | Cytosol        |
| 961  | 199c         | urate(c)       | Urate                                             | Cytosol        |
| 962  | 640c         | urcan(c)       | Urocanate                                         | Cytosol        |
| 963  | 1054c        | urea(c)        | Urea                                              | Cytosol        |
| 964  | 10727c       | uri(c)         | Uridine                                           | Cytosol        |
| 965  | 345c         | utp(c)         | UTP                                               | Cytosol        |
| 966  | 18459c       | vacc(c)        | vaccenic acid                                     | Cytosol        |
| 967  | 18479c       | vacccoa(c)     | vaccenyl coenzyme A                               | Cytosol        |
| 968  | 25973c       | vaccern(c)     | Vaccenyl carnitine                                | Cytosol        |
| 969  | 250c         | val-L(c)       | L-Valine                                          | Cytosol        |
| 970  | 20013c       | vitd2(c)       | Vitamin D2                                        | Cytosol        |
| 971  | 20001c       | vitd3(c)       | Vitamin D3                                        | Cytosol        |
| 972  | 20811c       | whddca(c)      | omega hydroxy dodecanoate (n-C12:0)               | Cytosol        |
| 973  | 20813c       | whhdca(c)      | omega hydroxy hexadecanoate (n-C16:0)             | Cytosol        |
| 974  | 20403c       | whststerone(c) | w hydroxy testosterone                            | Cytosol        |
| 975  | 20812c       | whtdca(c)      | omega hydroxy tetradecanoate (n-C14:0)            | Cytosol        |
| 976  | 216c         | xan(c)         | Xanthine                                          | Cytosol        |
| 977  | 436c         | xmp(c)         | Xanthosine 5'-phosphate                           | Cytosol        |
| 978  | 3380c        | xol7ah(c)      | 7alpha-Hydroxy-5beta-cholestan-3-one              | Cytosol        |
| 979  | 3381c        | xol7ah2(c)     | 3alpha,7alpha-Dihydroxy-5beta-cholestane          | Cytosol        |
| 980  | 11535c       | xol7aone(c)    | 7alpha-Hydroxycholest-4-en-3-one                  | Cytosol        |
| 981  | 3384c        | xoldiolone(c)  | 7alpha,12alpha-Dihydroxycholest-4-en-3-one        | Cytosol        |
| 982  | 3382c        | xoldioloneh(c) | 7alpha,12alpha-Dihydroxy-5beta-cholestan-3-one    | Cytosol        |
| 983  | 22732c       | xolest2_hs(c)  | cholesterol ester (from FULLR2)                   | Cytosol        |
| 984  | 2593c        | xolest_hs(c)   | cholesterol ester                                 | Cytosol        |
| 985  | 17068c       | xoltri24(c)    | 7-alpha,24(S)-Dihydroxycholesterol                | Cytosol        |
| 986  | 17067c       | xoltri25(c)    | 7-alpha,25-Dihydroxycholesterol                   | Cytosol        |
| 987  | 4061c        | xoltri27(c)    | 7-alpha,27-Dihydroxycholesterol                   | Cytosol        |
| 988  | 3383c        | xoltriol(c)    | 3alpha,7alpha,12alpha-Trihydroxy-5beta-cholestane | Cytosol        |
| 989  | 459c         | xtp(c)         | XTP                                               | Cytosol        |
| 990  | 10906c       | xtsn(c)        | Xanthosine                                        | Cytosol        |
| 991  | 22281c       | xu1p-D(c)      | D-Xylulose 1-phosphate                            | Cytosol        |
| 992  | 283c         | xu5p-D(c)      | D-Xylulose 5-phosphate                            | Cytosol        |
| 993  | 248c         | xyl-D(c)       | D-Xylose                                          | Cytosol        |
| 994  | 4197c        | xylnt(c)       | L-Xylonate                                        | Cytosol        |
| 995  | 211c         | xylt(c)        | Xylitol                                           | Cytosol        |
| 996  | 157c         | xylu-D(c)      | D-Xylulose                                        | Cytosol        |
| 997  | 159c         | xylu-L(c)      | L-Xylulose                                        | Cytosol        |
| 998  | 20140c       | yvite(c)       | gamma-Tocopherol                                  | Cytosol        |
| 999  | 286e         | 10fthf(e)      | 10-Formyltetrahydrofolate                         | Extra-organism |
| 1000 | 20786e       | 10fthf5glu(e)  | 10-formyltetrahydrofolate-[Glu](5)                | Extra-organism |
| 1001 | 20787e       | 10fthf6glu(e)  | 10-formyltetrahydrofolate-[Glu](6)                | Extra-organism |
| 1002 | 20788e       | 10fthf7glu(e)  | 10-formyltetrahydrofolate-[Glu](7)                | Extra-organism |

| Row  | Metabolite # | Abbreviation        | Metabolite Name                                                   | Compartment    |
|------|--------------|---------------------|-------------------------------------------------------------------|----------------|
| 1003 | 22812e       | 11-cis-retfa(e)     | fatty acid 11-cis-retinol                                         | Extra-organism |
| 1004 | 22816e       | 13-cis-retnglc(e)   | 13-cis-retinoyl glucuronide                                       | Extra-organism |
| 1005 | 22325e       | 1glyc_hs(e)         | 1 acyl phosphoglycerol                                            | Extra-organism |
| 1006 | 18732e       | 1mncam(e)           | 1-Methylnicotinamide                                              | Extra-organism |
| 1007 | 20023e       | 2425dhvitd2(e)      | 24R,25-Dihyoxyvitamin D2                                          | Extra-organism |
| 1008 | 20024e       | 2425dhvitd3(e)      | 24R,25-Dihydroxyvitamin D3                                        | Extra-organism |
| 1009 | 20412e       | 24nph(e)            | 2,4 dihydroxy nitrophenol                                         | Extra-organism |
| 1010 | 20014e       | 25hvitd2(e)         | 25-Hydroxyvitamin D2                                              | Extra-organism |
| 1011 | 20012e       | 25hvitd3(e)         | 25-Hydroxyvitamin D3                                              | Extra-organism |
| 1012 | 4433e        | 2hb(e)              | 2-Hydroxybutyrate                                                 | Extra-organism |
| 1013 | 1591e        | 2mctit(e)           | 2-Methylcitrate                                                   | Extra-organism |
| 1014 | 3464e        | 34dhoxpeg(e)        | 3,4-Dihydroxyphenylethyleneglycol                                 | Extra-organism |
| 1015 | 190e         | 34dhphe(e)          | 3,4-Dihydroxy-L-phenylalanine                                     | Extra-organism |
| 1016 | 9005e        | 35cgmp(e)           | 3',5'-Cyclic GMP                                                  | Extra-organism |
| 1017 | 2457e        | 3aib(e)             | L-3-Amino-isobutanoate                                            | Extra-organism |
| 1018 | 2444e        | 3aib-D(e)           | D-3-Amino-isobutanoate                                            | Extra-organism |
| 1019 | 10891e       | 3mlda(e)            | 3-Methylimidazoleacetic acid                                      | Extra-organism |
| 1020 | 176e         | 4abut(e)            | 4-Aminobutanoate                                                  | Extra-organism |
| 1021 | 20409e       | 4hdebrisoquine(e)   | 4 hydroxy debrisoquine                                            | Extra-organism |
| 1022 | 1127e        | 4hphac(e)           | 4-Hydroxyphenylacetate                                            | Extra-organism |
| 1023 | 20411e       | 4mtolbutamide(e)    | 4 hydroxy tolbutamide                                             | Extra-organism |
| 1024 | 730e         | 4nph(e)             | 4-Nitrophenol                                                     | Extra-organism |
| 1025 | 21119e       | 4nphsf(e)           | 4-Nitrophenyl sulfate                                             | Extra-organism |
| 1026 | 717e         | 4pyrdx(e)           | 4-Pyridoxate                                                      | Extra-organism |
| 1027 | 10712e       | 5adtststerone(e)    | 5alpha-Dihydrotestosterone                                        | Extra-organism |
| 1028 | 22786e       | 5adtststeroneglc(e) | 5alpha-Dihydrotestosterone glucuronide                            | Extra-organism |
| 1029 | 26487e       | 5adtststerones(e)   | 5alpha-Dihydrotestosterone sulfate                                | Extra-organism |
| 1030 | 20783e       | 5dhf(e)             | pentaglutamyl folate (DHF)                                        | Extra-organism |
| 1031 | 11866e       | 5fthf(e)            | 5-Formyltetrahydrofolate                                          | Extra-organism |
| 1032 | 20405e       | 5homeprazole(e)     | 5 hydroxy omeprazole                                              | Extra-organism |
| 1033 | 831e         | 5htrp(e)            | 5-Hydroxy-L-tryptophan                                            | Extra-organism |
| 1034 | 431e         | 5mthf(e)            | 5-Methyltetrahydrofolate                                          | Extra-organism |
| 1035 | 20780e       | 5thf(e)             | pentaglutamyl folate (THF)                                        | Extra-organism |
| 1036 | 20784e       | 6dhf(e)             | haxglutamyl folate (DHF)                                          | Extra-organism |
| 1037 | 20402e       | 6htststerone(e)     | 6 beta hydroxy testosterone                                       | Extra-organism |
| 1038 | 20781e       | 6thf(e)             | hexaglutamyl folate (THF)                                         | Extra-organism |
| 1039 | 20785e       | 7dhf(e)             | heptaglutamyl folate (DHF)                                        | Extra-organism |
| 1040 | 20782e       | 7thf(e)             | heptaglutamyl folate (THF)                                        | Extra-organism |
| 1041 | 22811e       | 9-cis-retfa(e)      | fatty acid 9-cis-retinol                                          | Extra-organism |
| 1042 | 105e         | Lcystin(e)          | L-Cystine                                                         | Extra-organism |
| 1043 | 18523e       | Rtotal(e)           | R total                                                           | Extra-organism |
| 1044 | 18525e       | Rtotal2(e)          | R total 2 position                                                | Extra-organism |
| 1045 | 18526e       | Rtotal3(e)          | R total 3 position                                                | Extra-organism |
| 1046 | 18059e       | Tyr-ggn(e)          | Tyr-194 of apo-glycogenin protein (primer for glycogen synthesis) | Extra-organism |
| 1047 | 360e         | abt(e)              | L-Arabinitol                                                      | Extra-organism |
| 1048 | 319e         | ac(e)               | Acetate                                                           | Extra-organism |
| 1049 | 9016e        | acac(e)             | Acetoacetate                                                      | Extra-organism |
| 1050 | 1052e        | acald(e)            | Acetaldehyde                                                      | Extra-organism |
| 1051 | 266e         | acetone(e)          | Acetone                                                           | Extra-organism |

| Row  | Metabolite # | Abbreviation                                          | Metabolite Name                                              | Compartment    |
|------|--------------|-------------------------------------------------------|--------------------------------------------------------------|----------------|
| 1052 | 22669e       | acgalfucgalacgalfuc12gal14acglcgalgluside_hs(e)       | Type IIIA glycolipid                                         | Extra-organism |
| 1053 | 22681e       | acgalfucgalacgalfucgalacglcgal14acglcgalgluside_hs(e) | Type IIIAb                                                   | Extra-organism |
| 1054 | 224e         | acgam(e)                                              | N-Acetyl-D-glucosamine                                       | Extra-organism |
| 1055 | 1617e        | ach(e)                                                | Acetylcholine                                                | Extra-organism |
| 1056 | 19741e       | acn13acngalgsbside_hs(e)                              | sialyl (1,3) sialyl (2,6) galactosylgloboside (homo sapiens) | Extra-organism |
| 1057 | 19742e       | acn23acngalgsbside_hs(e)                              | sialyl (2,3) sialyl (2,6) galactosylgloboside (homo sapiens) | Extra-organism |
| 1058 | 22662e       | acnacngal14acglcgalgluside_hs(e)                      | 3',8'-LD1                                                    | Extra-organism |
| 1059 | 19738e       | acnacngalgsbside_hs(e)                                | disialyl galactosylgloboside (homo sapiens)                  | Extra-organism |
| 1060 | 22682e       | acngalacglcgal14acglcgalgluside_hs(e)                 | VI3NeuAc-nLc6Cer                                             | Extra-organism |
| 1061 | 228e         | ade(e)                                                | Adenine                                                      | Extra-organism |
| 1062 | 270e         | adn(e)                                                | Adenosine                                                    | Extra-organism |
| 1063 | 471e         | adp(e)                                                | ADP                                                          | Extra-organism |
| 1064 | 2434e        | adprbp(e)                                             | ADPribose 2'-phosphate                                       | Extra-organism |
| 1065 | 151e         | adprib(e)                                             | ADPribose                                                    | Extra-organism |
| 1066 | 18463e       | adrn(e)                                               | adrenic acid                                                 | Extra-organism |
| 1067 | 641e         | adrnl(e)                                              | Adrenaline                                                   | Extra-organism |
| 1068 | 20413e       | aflatoxin(e)                                          | aflatoxin B1                                                 | Extra-organism |
| 1069 | 20819e       | ahandrostanglc(e)                                     | Etiocholan-3alpha-ol-17-one 3-glucuronide                    | Extra-organism |
| 1070 | 19364e       | ak2lgchol_hs(e)                                       | 1-alkyl 2-lysglycerol 3-phosphocholine                       | Extra-organism |
| 1071 | 314e         | akg(e)                                                | 2-Oxoglutarate                                               | Extra-organism |
| 1072 | 1063e        | ala-B(e)                                              | beta-Alanine                                                 | Extra-organism |
| 1073 | 1093e        | ala-D(e)                                              | D-Alanine                                                    | Extra-organism |
| 1074 | 11412e       | ala-L(e)                                              | L-Alanine                                                    | Extra-organism |
| 1075 | 1447e        | aldstrn(e)                                            | Aldosterone                                                  | Extra-organism |
| 1076 | 309e         | amp(e)                                                | AMP                                                          | Extra-organism |
| 1077 | 352e         | andrstrn(e)                                           | Androsterone                                                 | Extra-organism |
| 1078 | 20815e       | andrstrnglc(e)                                        | androsterone glucuronide                                     | Extra-organism |
| 1079 | 20406e       | antipyrene(e)                                         | antipyrene                                                   | Extra-organism |
| 1080 | 2071e        | apnnox(e)                                             | alpha-Pinene-oxide                                           | Extra-organism |
| 1081 | 4033e        | appnn(e)                                              | (+)-alpha-Pinene                                             | Extra-organism |
| 1082 | 3086e        | aprgstrn(e)                                           | 20alpha-Hydroxyprogesterone                                  | Extra-organism |
| 1083 | 816e         | aqcobal(e)                                            | Aquacob(III)alamin                                           | Extra-organism |
| 1084 | 307e         | arab-L(e)                                             | L-Arabinose                                                  | Extra-organism |
| 1085 | 5355e        | arach(e)                                              | Arachidic acid                                               | Extra-organism |
| 1086 | 11890e       | arachd(e)                                             | arachidonic acid                                             | Extra-organism |
| 1087 | 337e         | arg-L(e)                                              | L-Arginine                                                   | Extra-organism |
| 1088 | 11279e       | ascb-L(e)                                             | L-Ascorbate                                                  | Extra-organism |
| 1089 | 232e         | asn-L(e)                                              | L-Asparagine                                                 | Extra-organism |
| 1090 | 10519e       | asp-D(e)                                              | D-Aspartate                                                  | Extra-organism |
| 1091 | 330e         | asp-L(e)                                              | L-Aspartate                                                  | Extra-organism |
| 1092 | 465e         | atp(e)                                                | ATP                                                          | Extra-organism |



| Row  | Metabolite # | Abbreviation    | Metabolite Name                                                         | Compartment    |
|------|--------------|-----------------|-------------------------------------------------------------------------|----------------|
| 1093 | 20142e       | avite1(e)       | alpha-Tocopherol                                                        | Extra-organism |
| 1094 | 20141e       | avite2(e)       | alpha-Tocotrienol                                                       | Extra-organism |
| 1095 | 870e         | bhb(e)          | (R)-3-Hydroxybutanoate                                                  | Extra-organism |
| 1096 | 4279e        | bilg1cur(e)     | Bilirubin beta-diglycuronide                                            | Extra-organism |
| 1097 | 1942e        | bilg1cur(e)     | Bilirubin monoglycuronide                                               | Extra-organism |
| 1098 | 101e         | bilirub(e)      | Bilirubin                                                               | Extra-organism |
| 1099 | 4297e        | biocyt(e)       | Biocytin                                                                | Extra-organism |
| 1100 | 1079e        | btn(e)          | Biotin                                                                  | Extra-organism |
| 1101 | 294e         | but(e)          | Butyrate (n-C4:0)                                                       | Extra-organism |
| 1102 | 20143e       | bvite(e)        | beta-tocopherol                                                         | Extra-organism |
| 1103 | 10989e       | bz(e)           | Benzoate                                                                | Extra-organism |
| 1104 | 346e         | ca2(e)          | Calcium                                                                 | Extra-organism |
| 1105 | 8980e        | camp(e)         | cAMP                                                                    | Extra-organism |
| 1106 | 19576e       | caro(e)         | beta-Carotene                                                           | Extra-organism |
| 1107 | 798e         | carveol(e)      | (E)-carveol                                                             | Extra-organism |
| 1108 | 20077e       | cca_d3(e)       | Calcitroic acid (D3)                                                    | Extra-organism |
| 1109 | 7908e        | cgly(e)         | Cys-Gly                                                                 | Extra-organism |
| 1110 | 1075e        | chol(e)         | Choline                                                                 | Extra-organism |
| 1111 | 457e         | cholate(e)      | Cholate                                                                 | Extra-organism |
| 1112 | 252e         | chsterol(e)     | Cholesterol                                                             | Extra-organism |
| 1113 | 19243e       | chtn(e)         | chitin                                                                  | Extra-organism |
| 1114 | 236e         | cit(e)          | Citrate                                                                 | Extra-organism |
| 1115 | 5268e        | cl(e)           | Chloride                                                                | Extra-organism |
| 1116 | 18467e       | clpnd(e)        | clupanodonic acid                                                       | Extra-organism |
| 1117 | 11376e       | cmp(e)          | CMP                                                                     | Extra-organism |
| 1118 | 12152e       | co(e)           | Carbon monoxide                                                         | Extra-organism |
| 1119 | 474e         | co2(e)          | CO2                                                                     | Extra-organism |
| 1120 | 4331e        | coumarin(e)     | coumarin                                                                | Extra-organism |
| 1121 | 150e         | creat(e)        | Creatine                                                                | Extra-organism |
| 1122 | 2222e        | crmp_hs(e)      | Ceramide 1-phosphate                                                    | Extra-organism |
| 1123 | 163e         | crn(e)          | L-Carnitine                                                             | Extra-organism |
| 1124 | 11891e       | crvnc(e)        | cervonic acid, C22:6 n-3                                                | Extra-organism |
| 1125 | 212e         | csn(e)          | Cytosine                                                                | Extra-organism |
| 1126 | 20541e       | cspg_a(e)       | chondroitin sulfate A (GalNAc4S-GlcA) proteoglycan                      | Extra-organism |
| 1127 | 20599e       | cspg_b(e)       | chondroitin sulfate B / dermatan sulfate (IdoA2S-GalNAc4S) proteoglycan | Extra-organism |
| 1128 | 20545e       | cspg_c(e)       | chondroitin sulfate C (GalNAc6S-GlcA) proteoglycan                      | Extra-organism |
| 1129 | 20554e       | cspg_d(e)       | chondroitin sulfate D (GlcNAc6S-GlcA2S) proteoglycan                    | Extra-organism |
| 1130 | 20549e       | cspg_e(e)       | chondroitin sulfate E (GalNAc4,6diS-GlcA) proteoglycan                  | Extra-organism |
| 1131 | 245e         | cyan(e)         | Hydrogen cyanide                                                        | Extra-organism |
| 1132 | 1062e        | cys-L(e)        | L-Cysteine                                                              | Extra-organism |
| 1133 | 92e          | cytd(e)         | Cytidine                                                                | Extra-organism |
| 1134 | 380e         | dad-2(e)        | Deoxyadenosine                                                          | Extra-organism |
| 1135 | 3751e        | dad-5(e)        | 5'-Deoxyadenosine                                                       | Extra-organism |
| 1136 | 18537e       | dag_hs(e)       | diacylglycerol (homo sapiens)                                           | Extra-organism |
| 1137 | 18466e       | dcsptn1(e)      | docosa-4,7,10,13,16-pentaenoic acid (n-6)                               | Extra-organism |
| 1138 | 10918e       | dcyt(e)         | Deoxycytidine                                                           | Extra-organism |
| 1139 | 20408e       | debrisoquine(e) | debrisoquine                                                            | Extra-organism |
| 1140 | 3387e        | dgchol(e)       | Chenodeoxyglycocholate                                                  | Extra-organism |

| Row  | Metabolite # | Abbreviation                                              | Metabolite Name                                  | Compartment    |
|------|--------------|-----------------------------------------------------------|--------------------------------------------------|----------------|
| 1141 | 172e         | dgsn(e)                                                   | Deoxyguanosine                                   | Extra-organism |
| 1142 | 421e         | dhdascb(e)                                                | Dehydroascorbate                                 | Extra-organism |
| 1143 | 3998e        | dheas(e)                                                  | Dehydroepiandrosterone sulfate                   | Extra-organism |
| 1144 | 10505e       | dhf(e)                                                    | 7,8-Dihydrofolate                                | Extra-organism |
| 1145 | 4544e        | digalsgalside_hs(e)                                       | Digalactosylceramidesulfate                      | Extra-organism |
| 1146 | 3417e        | din(e)                                                    | Deoxyinosine                                     | Extra-organism |
| 1147 | 2431e        | dnlcg(e)                                                  | dihomo-gamma-linolenic acid (n-6)                | Extra-organism |
| 1148 | 20407e       | dmantipyrine(e)                                           | demethylated antipyrine                          | Extra-organism |
| 1149 | 26488e       | dmhptcrn(e)                                               | 2,6 dimethylheptanoyl carnitine                  | Extra-organism |
| 1150 | 2882e        | dopa(e)                                                   | Dopamine                                         | Extra-organism |
| 1151 | 21114e       | dopasf(e)                                                 | Dopamine 3-O-sulfate                             | Extra-organism |
| 1152 | 1462e        | drib(e)                                                   | Deoxyribose                                      | Extra-organism |
| 1153 | 355e         | duri(e)                                                   | Deoxyuridine                                     | Extra-organism |
| 1154 | 20414e       | eaflatoxin(e)                                             | 8,9 epoxy aflatoxin B1                           | Extra-organism |
| 1155 | 20367e       | ebastine(e)                                               | ebastine                                         | Extra-organism |
| 1156 | 20368e       | ebastineoh(e)                                             | hydroxylated ebastine                            | Extra-organism |
| 1157 | 18506e       | eicostet(e)                                               | eicosatetraenoic acid                            | Extra-organism |
| 1158 | 588e         | elaid(e)                                                  | elaidic acid                                     | Extra-organism |
| 1159 | 20817e       | estradiolglc(e)                                           | estradiol glucuronide                            | Extra-organism |
| 1160 | 3415e        | estriolglc(e)                                             | 16-Glucuronide-estriol                           | Extra-organism |
| 1161 | 20814e       | estroneglc(e)                                             | estrone glucuronide                              | Extra-organism |
| 1162 | 2601e        | estrones(e)                                               | Estrone 3-sulfate                                | Extra-organism |
| 1163 | 87e          | etoh(e)                                                   | Ethanol                                          | Extra-organism |
| 1164 | 312e         | fe2(e)                                                    | Fe2+                                             | Extra-organism |
| 1165 | 5267e        | fe3(e)                                                    | Fe3+                                             | Extra-organism |
| 1166 | 118e         | fol(e)                                                    | Folate                                           | Extra-organism |
| 1167 | 334e         | for(e)                                                    | Formate                                          | Extra-organism |
| 1168 | 1061e        | fru(e)                                                    | D-Fructose                                       | Extra-organism |
| 1169 | 833e         | fuc-L(e)                                                  | L-Fucose                                         | Extra-organism |
| 1170 | 22691e       | fuc13galacglcg14<br>acglcggluside_hs(<br>e)               | III3Fuc-nLc6Cer                                  | Extra-organism |
| 1171 | 22658e       | fuc14galacglcg1<br>uside_hs(e)                            | Lea glycolipid                                   | Extra-organism |
| 1172 | 22657e       | fucacgalfucgalacgl<br>cggluside_hs(e)                     | (Gal)2 (GalNAc)1 (Glc)1 (GlcNAc)1 (LFuc)2 (Cer)1 | Extra-organism |
| 1173 | 22663e       | fucacngal14acglcga<br>lgluside_hs(e)                      | IV3-a-NeuAc,III3-a-Fuc-nLc4Cer                   | Extra-organism |
| 1174 | 22655e       | fucacngalacglcgalg<br>luside_hs(e)                        | IV3-a-Neu5Ac,III4-a-Fuc-Lc4Cer                   | Extra-organism |
| 1175 | 22665e       | fucfuc12gal14acglc<br>galgluside_hs(e)                    | Ley glycolipid                                   | Extra-organism |
| 1176 | 22693e       | fucfuc132galacglcg<br>al14acglcggluside<br>_hs(e)         | V3Fuc,III3Fuc-nLc6Cer                            | Extra-organism |
| 1177 | 22690e       | fucfucfucgalacglc1<br>3galacglcg14acgl<br>cggluside_hs(e) | (Gal)4 (Glc)1 (GlcNAc)3 (LFuc)3 (Cer)1           | Extra-organism |

| Row  | Metabolite # | Abbreviation                                           | Metabolite Name                                                 | Compartment    |
|------|--------------|--------------------------------------------------------|-----------------------------------------------------------------|----------------|
| 1178 | 22685e       | fucfucfucgalacglcgal14acglcgalgluside_hs(e)            | (Gal)3 (Glc)1 (GlcNAc)2 (LFuc)3 (Cer)1                          | Extra-organism |
| 1179 | 22650e       | fucfucgalacglcgalgluside_hs(e)                         | Leb glycolipid                                                  | Extra-organism |
| 1180 | 22660e       | fucgal14acglcgalgluside_hs(e)                          | Lacto-N-fucopentaosyl III ceramide                              | Extra-organism |
| 1181 | 22652e       | fucgalfucgalacglcgalgluside_hs(e)                      | (Gal)3 (Glc)1 (GlcNAc)1 (LFuc)2 (Cer)1                          | Extra-organism |
| 1182 | 19746e       | fucgalgbside_hs(e)                                     | fucosyl galactosylglobside (homo sapiens)                       | Extra-organism |
| 1183 | 1083e        | gal(e)                                                 | D-Galactose                                                     | Extra-organism |
| 1184 | 19744e       | galacglcgalgbside_hs(e)                                | Gal-GlcNAc-Gal globoside (homo sapiens)                         | Extra-organism |
| 1185 | 22670e       | galfuc12gal14acglcgalgluside_hs(e)                     | (Gal)3 (Glc)1 (GlcNAc)1 (LFuc)1 (Cer)1                          | Extra-organism |
| 1186 | 22683e       | galfucgalacglcgal14acglcgalgluside_hs(e)               | (Gal)4 (Glc)1 (GlcNAc)2 (LFuc)1 (Cer)1                          | Extra-organism |
| 1187 | 22676e       | galgalfucfucgalacglcgalacglcgal14acglcgalgluside_hs(e) | (Gal)6 (Glc)1 (GlcNAc)3 (LFuc)2 (Cer)1                          | Extra-organism |
| 1188 | 19735e       | galgalgalthcrm_hs(e)                                   | Gal-Gal-Gal-Gal-Gal-Glc-Cer (homo sapiens)                      | Extra-organism |
| 1189 | 171e         | gam(e)                                                 | D-Glucosamine                                                   | Extra-organism |
| 1190 | 19624e       | gbside_hs(e)                                           | globside (homo sapiens)                                         | Extra-organism |
| 1191 | 1554e        | gchola(e)                                              | glycocholate                                                    | Extra-organism |
| 1192 | 19757e       | gd1b2_hs(e)                                            | GD1beta (homo sapiens)                                          | Extra-organism |
| 1193 | 19754e       | gd1c_hs(e)                                             | GD1c (homo sapiens)                                             | Extra-organism |
| 1194 | 11524e       | gdchola(e)                                             | glycochenodeoxycholate                                          | Extra-organism |
| 1195 | 321e         | gdp(e)                                                 | GDP                                                             | Extra-organism |
| 1196 | 318e         | glc-D(e)                                               | D-Glucose                                                       | Extra-organism |
| 1197 | 11299e       | gln-L(e)                                               | L-Glutamine                                                     | Extra-organism |
| 1198 | 313e         | glu-L(e)                                               | L-Glutamate                                                     | Extra-organism |
| 1199 | 7925e        | gluala(e)                                              | 5-L-Glutamyl-L-alanine                                          | Extra-organism |
| 1200 | 323e         | gly(e)                                                 | Glycine                                                         | Extra-organism |
| 1201 | 503e         | glyb(e)                                                | Glycine betaine                                                 | Extra-organism |
| 1202 | 1077e        | glyc(e)                                                | Glycerol                                                        | Extra-organism |
| 1203 | 18741e       | glyc-S(e)                                              | (S)-Glycerate                                                   | Extra-organism |
| 1204 | 18062e       | glygn2(e)                                              | glycogen, structure 2 (glycogenin-1,6-{7[1,4-Glc], 4[1,4-Glc]}) | Extra-organism |
| 1205 | 18142e       | glygn4(e)                                              | glycogen, structure 4 (glycogenin-1,6-{2[1,4-Glc], [1,4-Glc]})  | Extra-organism |
| 1206 | 18148e       | glygn5(e)                                              | glycogen, structure 5 (glycogenin-2[1,4-Glc])                   | Extra-organism |
| 1207 | 226e         | gmp(e)                                                 | GMP                                                             | Extra-organism |
| 1208 | 19768e       | gp1c_hs(e)                                             | GP1c (homo sapiens)                                             | Extra-organism |
| 1209 | 19976e       | gp1calpha_hs(e)                                        | GP1c alpha (homo sapiens)                                       | Extra-organism |
| 1210 | 19763e       | gq1b_hs(e)                                             | GQ1b (homo sapiens)                                             | Extra-organism |
| 1211 | 19771e       | gq1balpha_hs(e)                                        | GQ1balpha (homo sapiens)                                        | Extra-organism |
| 1212 | 5279e        | gsn(e)                                                 | Guanosine                                                       | Extra-organism |
| 1213 | 19749e       | gt1a_hs(e)                                             | GT1a (homo sapiens)                                             | Extra-organism |
| 1214 | 1087e        | gthox(e)                                               | Oxidized glutathione                                            | Extra-organism |

| Row  | Metabolite # | Abbreviation   | Metabolite Name                          | Compartment    |
|------|--------------|----------------|------------------------------------------|----------------|
| 1215 | 11388e       | gthrd(e)       | Reduced glutathione                      | Extra-organism |
| 1216 | 327e         | gtp(e)         | GTP                                      | Extra-organism |
| 1217 | 291e         | gua(e)         | Guanine                                  | Extra-organism |
| 1218 | 1049e        | h(e)           | H+                                       | Extra-organism |
| 1219 | 317e         | h2o(e)         | H2O                                      | Extra-organism |
| 1220 | 315e         | h2o2(e)        | Hydrogen peroxide                        | Extra-organism |
| 1221 | 9554e        | ha(e)          | hyaluronan                               | Extra-organism |
| 1222 | 22610e       | ha_pre1(e)     | hyaluronan biosynthesis, precursor 1     | Extra-organism |
| 1223 | 144e         | hco3(e)        | Bicarbonate                              | Extra-organism |
| 1224 | 20383e       | hcoumarin(e)   | hydroxy coumarin                         | Extra-organism |
| 1225 | 297e         | hdca(e)        | Hexadecanoate (n-C16:0)                  | Extra-organism |
| 1226 | 5725e        | hdcea(e)       | Hexadecenoate (n-C16:1)                  | Extra-organism |
| 1227 | 20384e       | hestratriol(e) | 4,17 dihydroxy estradiol                 | Extra-organism |
| 1228 | 9242e        | hexc(e)        | hexacosanoate (n-C26:0)                  | Extra-organism |
| 1229 | 11120e       | his-L(e)       | L-Histidine                              | Extra-organism |
| 1230 | 15080e       | hista(e)       | Histamine                                | Extra-organism |
| 1231 | 131e         | hom-L(e)       | L-Homoserine                             | Extra-organism |
| 1232 | 6306e        | hpdca(e)       | heptadecanoate                           | Extra-organism |
| 1233 | 20638e       | hspg(e)        | heparan sulfate proteoglycan             | Extra-organism |
| 1234 | 20376e       | htaxol(e)      | hydroxylated taxol                       | Extra-organism |
| 1235 | 218e         | hxan(e)        | Hypoxanthine                             | Extra-organism |
| 1236 | 464e         | i(e)           | Iodide                                   | Extra-organism |
| 1237 | 1067e        | idp(e)         | IDP                                      | Extra-organism |
| 1238 | 410e         | ile-L(e)       | L-Isoleucine                             | Extra-organism |
| 1239 | 1090e        | imp(e)         | IMP                                      | Extra-organism |
| 1240 | 223e         | inost(e)       | myo-Inositol                             | Extra-organism |
| 1241 | 147e         | ins(e)         | Inosine                                  | Extra-organism |
| 1242 | 289e         | k(e)           | potassium                                | Extra-organism |
| 1243 | 20192e       | ksi(e)         | keratan sulfate I                        | Extra-organism |
| 1244 | 22553e       | ksi_deg1(e)    | keratan sulfate I, degradation product 1 | Extra-organism |
| 1245 | 20156e       | ksii_core2(e)  | keratan sulfate II (core 2-linked)       | Extra-organism |
| 1246 | 20342e       | ksii_core4(e)  | keratan sulfate II (core 4-linked)       | Extra-organism |
| 1247 | 304e         | lac-D(e)       | D-Lactate                                | Extra-organism |
| 1248 | 10931e       | lac-L(e)       | L-Lactate                                | Extra-organism |
| 1249 | 292e         | lcts(e)        | Lactose                                  | Extra-organism |
| 1250 | 1082e        | leu-L(e)       | L-Leucine                                | Extra-organism |
| 1251 | 17887e       | leuktrC4(e)    | Leukotriene C4                           | Extra-organism |
| 1252 | 18473e       | lgnc(e)        | lignoceric acid                          | Extra-organism |
| 1253 | 10371e       | limnen(e)      | Limonene                                 | Extra-organism |
| 1254 | 11278e       | lipoate(e)     | Lipoate                                  | Extra-organism |
| 1255 | 18461e       | lneldc(e)      | linoelaidic acid (all trans C18:2)       | Extra-organism |
| 1256 | 11172e       | lnlc(e)        | linoleic acid (all cis C18:2) n-6        | Extra-organism |
| 1257 | 11152e       | lnlnca(e)      | alpha-Linolenic acid, C18:3, n-3         | Extra-organism |
| 1258 | 5356e        | lnlncg(e)      | gamma-linolenic acid                     | Extra-organism |
| 1259 | 19382e       | lpchol_hs(e)   | lysophosphatidylcholine (homo sapiens)   | Extra-organism |
| 1260 | 328e         | lys-L(e)       | L-Lysine                                 | Extra-organism |
| 1261 | 18539e       | mag_hs(e)      | monoacylglycerol 2 (homo sapiens)        | Extra-organism |
| 1262 | 267e         | malt(e)        | Maltose                                  | Extra-organism |
| 1263 | 1284e        | malttr(e)      | Maltotriose                              | Extra-organism |
| 1264 | 11018e       | man(e)         | D-Mannose                                | Extra-organism |
| 1265 | 137e         | man6p(e)       | D-Mannose 6-phosphate                    | Extra-organism |
| 1266 | 1092e        | meoh(e)        | Methanol                                 | Extra-organism |
| 1267 | 11265e       | mepi(e)        | Metanephrine                             | Extra-organism |

| Row  | Metabolite # | Abbreviation   | Metabolite Name                                                                                                                                                                                     | Compartment    |
|------|--------------|----------------|-----------------------------------------------------------------------------------------------------------------------------------------------------------------------------------------------------|----------------|
| 1268 | 26412e       | mercplaccys(e) | 3-mercaptolactate-cysteine disulfide                                                                                                                                                                | Extra-organism |
| 1269 | 343e         | met-L(e)       | L-Methionine                                                                                                                                                                                        | Extra-organism |
| 1270 | 370e         | mthgxl(e)      | Methylglyoxal                                                                                                                                                                                       | Extra-organism |
| 1271 | 3649e        | n2m2nmasn(e)   | N-Acetyl-beta-D-glucosaminyl-1,2-alpha-D-mannosyl-1,3-(N-acetyl-beta-D-glucosaminyl-1,2-alpha-D-mannosyl-1,6)-(N-acetyl-beta-D-glucosaminyl-1,4)-beta-D-mannosyl-1,4-N-acetyl-beta-D-glucosaminyl-R | Extra-organism |
| 1272 | 1023e        | na1(e)         | Sodium                                                                                                                                                                                              | Extra-organism |
| 1273 | 301e         | nac(e)         | Nicotinate                                                                                                                                                                                          | Extra-organism |
| 1274 | 466e         | nad(e)         | Nicotinamide adenine dinucleotide                                                                                                                                                                   | Extra-organism |
| 1275 | 469e         | nadp(e)        | Nicotinamide adenine dinucleotide phosphate                                                                                                                                                         | Extra-organism |
| 1276 | 233e         | ncam(e)        | Nicotinamide                                                                                                                                                                                        | Extra-organism |
| 1277 | 476e         | nh4(e)         | Ammonium                                                                                                                                                                                            | Extra-organism |
| 1278 | 20399e       | nifedipine(e)  | nifedipine                                                                                                                                                                                          | Extra-organism |
| 1279 | 361e         | no(e)          | Nitric oxide                                                                                                                                                                                        | Extra-organism |
| 1280 | 668e         | npthl(e)       | Naphthalene                                                                                                                                                                                         | Extra-organism |
| 1281 | 371e         | nrpphr(e)      | Norepinephrine                                                                                                                                                                                      | Extra-organism |
| 1282 | 21117e       | nrpphrs(e)     | Sulfate derivative of norepinephrine                                                                                                                                                                | Extra-organism |
| 1283 | 18464e       | nrvc(e)        | nervonic acid                                                                                                                                                                                       | Extra-organism |
| 1284 | 470e         | o2(e)          | O2                                                                                                                                                                                                  | Extra-organism |
| 1285 | 461e         | o2s(e)         | Superoxide anion                                                                                                                                                                                    | Extra-organism |
| 1286 | 20055e       | oagd3_hs(e)    | 9-O-Acetylated GD3 (homo sapiens)                                                                                                                                                                   | Extra-organism |
| 1287 | 20056e       | oagt3_hs(e)    | 9-O-Acetylated GT3 (homo sapiens)                                                                                                                                                                   | Extra-organism |
| 1288 | 1249e        | ocdca(e)       | octadecanoate (n-C18:0)                                                                                                                                                                             | Extra-organism |
| 1289 | 8769e        | ocdcea(e)      | octadecenoate (n-C18:1)                                                                                                                                                                             | Extra-organism |
| 1290 | 5354e        | octa(e)        | octanoate (n-C8:0)                                                                                                                                                                                  | Extra-organism |
| 1291 | 1021e        | oh1(e)         | hydroxide ion                                                                                                                                                                                       | Extra-organism |
| 1292 | 20404e       | omeprazole(e)  | omeprazole                                                                                                                                                                                          | Extra-organism |
| 1293 | 20401e       | onpthl(e)      | naphthalene epoxide                                                                                                                                                                                 | Extra-organism |
| 1294 | 1304e        | orn(e)         | Ornithine                                                                                                                                                                                           | Extra-organism |
| 1295 | 10901e       | oxa(e)         | Oxalate                                                                                                                                                                                             | Extra-organism |
| 1296 | 19365e       | paf_hs(e)      | 1-alkyl 2-acteylglycerol 3-phosphocholine (homo sapiens)                                                                                                                                            | Extra-organism |
| 1297 | 19051e       | pchol_hs(e)    | Phosphatidylcholine (homo sapiens)                                                                                                                                                                  | Extra-organism |
| 1298 | 19050e       | pe_hs(e)       | phosphatidylethanolamine (homo sapiens)                                                                                                                                                             | Extra-organism |
| 1299 | 5307e        | peplys(e)      | Peptidyl-L-lysine                                                                                                                                                                                   | Extra-organism |
| 1300 | 2536e        | perillyl(e)    | Perillyl alcohol                                                                                                                                                                                    | Extra-organism |
| 1301 | 19385e       | pglyc_hs(e)    | phosphatidylglycerol (homo sapiens)                                                                                                                                                                 | Extra-organism |
| 1302 | 1048e        | phe-L(e)       | L-Phenylalanine                                                                                                                                                                                     | Extra-organism |
| 1303 | 2972e        | pheacgln(e)    | alpha-N-Phenylacetyl-L-glutamine                                                                                                                                                                    | Extra-organism |
| 1304 | 11520e       | pHEME(e)       | Protoheme                                                                                                                                                                                           | Extra-organism |
| 1305 | 10509e       | phyQ(e)        | Phylloquinone                                                                                                                                                                                       | Extra-organism |
| 1306 | 1308e        | phyt(e)        | phytanic acid                                                                                                                                                                                       | Extra-organism |
| 1307 | 472e         | pi(e)          | Phosphate                                                                                                                                                                                           | Extra-organism |
| 1308 | 10928e       | pnto-R(e)      | (R)-Pantothenate                                                                                                                                                                                    | Extra-organism |
| 1309 | 238e         | ppa(e)         | Propionate (n-C3:0)                                                                                                                                                                                 | Extra-organism |
| 1310 | 629e         | pro-D(e)       | D-Proline                                                                                                                                                                                           | Extra-organism |
| 1311 | 229e         | pro-L(e)       | L-Proline                                                                                                                                                                                           | Extra-organism |
| 1312 | 11382e       | prostgd2(e)    | Prostaglandin D2                                                                                                                                                                                    | Extra-organism |
| 1313 | 3492e        | prostge1(e)    | Prostaglandin E1                                                                                                                                                                                    | Extra-organism |
| 1314 | 398e         | prostge2(e)    | Prostaglandin E2                                                                                                                                                                                    | Extra-organism |
| 1315 | 1126e        | prostgf2(e)    | Prostaglandin F2alpha                                                                                                                                                                               | Extra-organism |

| Row  | Metabolite # | Abbreviation                                      | Metabolite Name                                    | Compartment    |
|------|--------------|---------------------------------------------------|----------------------------------------------------|----------------|
| 1316 | 19052e       | ps_hs(e)                                          | phosphatidylserine (homo sapiens)                  | Extra-organism |
| 1317 | 6304e        | ptdca(e)                                          | pentadecanoate                                     | Extra-organism |
| 1318 | 362e         | pydam(e)                                          | Pyridoxamine                                       | Extra-organism |
| 1319 | 298e         | pydx(e)                                           | Pyridoxal                                          | Extra-organism |
| 1320 | 160e         | pydxn(e)                                          | Pyridoxine                                         | Extra-organism |
| 1321 | 311e         | pyr(e)                                            | Pyruvate                                           | Extra-organism |
| 1322 | 91e          | rbt(e)                                            | Ribitol                                            | Extra-organism |
| 1323 | 22806e       | retfa(e)                                          | fatty acid retinol                                 | Extra-organism |
| 1324 | 90e          | retinol(e)                                        | Retinol                                            | Extra-organism |
| 1325 | 19628e       | retinol-9-cis(e)                                  | 9-cis-retinol                                      | Extra-organism |
| 1326 | 19629e       | retinol-cis-11(e)                                 | cis-11-retinol                                     | Extra-organism |
| 1327 | 11153e       | retn(e)                                           | Retinoate                                          | Extra-organism |
| 1328 | 20818e       | retnglc(e)                                        | retinoyl glucuronide                               | Extra-organism |
| 1329 | 19574e       | retpalm [deleted<br>10/09/2005<br>06:18:49 PM](e) | Retinyl palmitate                                  | Extra-organism |
| 1330 | 1080e        | rib-D(e)                                          | D-Ribose                                           | Extra-organism |
| 1331 | 303e         | ribflv(e)                                         | Riboflavin                                         | Extra-organism |
| 1332 | 15207e       | s2l2fn2m2masn(e)                                  | PA6                                                | Extra-organism |
| 1333 | 15665e       | s2l2n2m2masn(e)                                   | de-Fuc form of PA6                                 | Extra-organism |
| 1334 | 271e         | sarcs(e)                                          | Sarcosine                                          | Extra-organism |
| 1335 | 4212e        | sel(e)                                            | Selenate                                           | Extra-organism |
| 1336 | 512e         | ser-D(e)                                          | D-Serine                                           | Extra-organism |
| 1337 | 339e         | ser-L(e)                                          | L-Serine                                           | Extra-organism |
| 1338 | 15786e       | sl-L(e)                                           | L-sulfolactate                                     | Extra-organism |
| 1339 | 335e         | so4(e)                                            | Sulfate                                            | Extra-organism |
| 1340 | 26303e       | spc_hs(e)                                         | sphingosylphosphorylcholine (homo sapiens)         | Extra-organism |
| 1341 | 9025e        | sph1p(e)                                          | Sphinganine 1-phosphate                            | Extra-organism |
| 1342 | 4541e        | sphs1p(e)                                         | Sphingosine 1-phosphate                            | Extra-organism |
| 1343 | 638e         | srtn(e)                                           | Serotonin                                          | Extra-organism |
| 1344 | 18126e       | strch1(e)                                         | starch, structure 1 (1,6-{7[1,4-Glc], 4[1,4-Glc]}) | Extra-organism |
| 1345 | 18141e       | strch2(e)                                         | starch, structure 2 (1,6-{2[1,4-Glc], [1,4-Glc]})  | Extra-organism |
| 1346 | 18462e       | strdnc(e)                                         | stearidonic acid C18:4, n-3                        | Extra-organism |
| 1347 | 325e         | succ(e)                                           | Succinate                                          | Extra-organism |
| 1348 | 1056e        | sucr(e)                                           | Sucrose                                            | Extra-organism |
| 1349 | 18538e       | tag_hs(e)                                         | triacylglycerol (homo sapiens)                     | Extra-organism |
| 1350 | 646e         | tagat-D(e)                                        | D-Tagatose                                         | Extra-organism |
| 1351 | 293e         | taur(e)                                           | Taurine                                            | Extra-organism |
| 1352 | 20374e       | taxol(e)                                          | paclitaxel                                         | Extra-organism |
| 1353 | 3700e        | tchola(e)                                         | taurocholic acid                                   | Extra-organism |
| 1354 | 1428e        | tcynt(e)                                          | Thiocyanate                                        | Extra-organism |
| 1355 | 3390e        | tdchola(e)                                        | taurochenodeoxycholate                             | Extra-organism |
| 1356 | 18514e       | tethex3(e)                                        | tetracosahexaenoic acid, n-3                       | Extra-organism |
| 1357 | 18512e       | tetpent3(e)                                       | tetracosapentaenoic acid, n-3                      | Extra-organism |
| 1358 | 18508e       | tetpent6(e)                                       | tetracosapentaenoic acid, n-6                      | Extra-organism |
| 1359 | 18510e       | tettet6(e)                                        | tetracosatetraenoic acid n-6                       | Extra-organism |
| 1360 | 1065e        | thf(e)                                            | 5,6,7,8-Tetrahydrofolate                           | Extra-organism |
| 1361 | 210e         | thm(e)                                            | Thiamin                                            | Extra-organism |
| 1362 | 866e         | thmmp(e)                                          | Thiamin monophosphate                              | Extra-organism |
| 1363 | 2271e        | thmtp(e)                                          | Thiamin triphosphate                               | Extra-organism |
| 1364 | 253e         | thr-L(e)                                          | L-Threonine                                        | Extra-organism |
| 1365 | 246e         | thym(e)                                           | Thymine                                            | Extra-organism |
| 1366 | 5269e        | thymd(e)                                          | Thymidine                                          | Extra-organism |

| Row  | Metabolite # | Abbreviation                                    | Metabolite Name                                                   | Compartment     |
|------|--------------|-------------------------------------------------|-------------------------------------------------------------------|-----------------|
| 1367 | 1482e        | thyox-L(e)                                      | L-Thyroxine                                                       | Extra-organism  |
| 1368 | 18465e       | tmndnc(e)                                       | timnodonic acid C20:5, n-3                                        | Extra-organism  |
| 1369 | 20410e       | tolbutamide(e)                                  | tolbutamide                                                       | Extra-organism  |
| 1370 | 867e         | tre(e)                                          | Trehalose                                                         | Extra-organism  |
| 1371 | 2543e        | triodythy(e)                                    | Triiodothyronine                                                  | Extra-organism  |
| 1372 | 21120e       | triodythysuf(e)                                 | Triiodothyronine sulfate                                          | Extra-organism  |
| 1373 | 1047e        | trp-L(e)                                        | L-Tryptophan                                                      | Extra-organism  |
| 1374 | 20816e       | ttststeroneglc(e)                               | testosterone glucuronide                                          | Extra-organism  |
| 1375 | 26486e       | ttststerones(e)                                 | testosterone sulfate                                              | Extra-organism  |
| 1376 | 164e         | tsul(e)                                         | Thiosulfate                                                       | Extra-organism  |
| 1377 | 6302e        | ttdca(e)                                        | tetradecanoate (n-C14:0)                                          | Extra-organism  |
| 1378 | 1777e        | txa2(e)                                         | Thromboxane A2                                                    | Extra-organism  |
| 1379 | 21118e       | tymsf(e)                                        | Tyramine O-sulfate                                                | Extra-organism  |
| 1380 | 1051e        | tyr-L(e)                                        | L-Tyrosine                                                        | Extra-organism  |
| 1381 | 477e         | udp(e)                                          | UDP                                                               | Extra-organism  |
| 1382 | 1068e        | ump(e)                                          | UMP                                                               | Extra-organism  |
| 1383 | 1069e        | ura(e)                                          | Uracil                                                            | Extra-organism  |
| 1384 | 199e         | urate(e)                                        | Urate                                                             | Extra-organism  |
| 1385 | 1054e        | urea(e)                                         | Urea                                                              | Extra-organism  |
| 1386 | 10727e       | uri(e)                                          | Uridine                                                           | Extra-organism  |
| 1387 | 345e         | utp(e)                                          | UTP                                                               | Extra-organism  |
| 1388 | 18459e       | vacc(e)                                         | vaccenic acid                                                     | Extra-organism  |
| 1389 | 250e         | val-L(e)                                        | L-Valine                                                          | Extra-organism  |
| 1390 | 20013e       | vitd2(e)                                        | Vitamin D2                                                        | Extra-organism  |
| 1391 | 20001e       | vitd3(e)                                        | Vitamin D3                                                        | Extra-organism  |
| 1392 | 20811e       | whddca(e)                                       | omega hydroxy dodecanoate (n-C12:0)                               | Extra-organism  |
| 1393 | 20813e       | whhdca(e)                                       | omega hydroxy hexadecanoate (n-C16:0)                             | Extra-organism  |
| 1394 | 20403e       | whststerone(e)                                  | w hydroxy testosterone                                            | Extra-organism  |
| 1395 | 20812e       | whtdca(e)                                       | omega hydroxy tetradecanoate (n-C14:0)                            | Extra-organism  |
| 1396 | 22732e       | xolest2_hs(e)                                   | cholesterol ester (from FULLR2)                                   | Extra-organism  |
| 1397 | 2593e        | xolest_hs(e)                                    | cholesterol ester                                                 | Extra-organism  |
| 1398 | 17068e       | xoltri24(e)                                     | 7-alpha,24(S)-Dihydroxycholesterol                                | Extra-organism  |
| 1399 | 17067e       | xoltri25(e)                                     | 7-alpha,25-Dihydroxycholesterol                                   | Extra-organism  |
| 1400 | 4061e        | xoltri27(e)                                     | 7-alpha,27-Dihydroxycholesterol                                   | Extra-organism  |
| 1401 | 248e         | xyl-D(e)                                        | D-Xylose                                                          | Extra-organism  |
| 1402 | 211e         | xylt(e)                                         | Xylitol                                                           | Extra-organism  |
| 1403 | 20140e       | yvite(e)                                        | gamma-Tocopherol                                                  | Extra-organism  |
| 1404 | 9005g        | 35cgmp(g)                                       | 3',5'-Cyclic GMP                                                  | Golgi Apparatus |
| 1405 | 15787g       | Ser/Thr(g)                                      | protein-linked serine or threonine residue (O-glycosylation site) | Golgi Apparatus |
| 1406 | 15792g       | T_antigen(g)                                    | T antigen (core 1)                                                | Golgi Apparatus |
| 1407 | 15788g       | Tn_antigen(g)                                   | Tn antigen                                                        | Golgi Apparatus |
| 1408 | 319g         | ac(g)                                           | Acetate                                                           | Golgi Apparatus |
| 1409 | 11537g       | accoa(g)                                        | Acetyl-CoA                                                        | Golgi Apparatus |
| 1410 | 19739g       | acgagbside_hs(g)                                | alpha GalNAc globoside (homo sapiens)                             | Golgi Apparatus |
| 1411 | 899g         | acgal(g)                                        | N-Acetyl-D-galactosamine                                          | Golgi Apparatus |
| 1412 | 22666g       | acgalfuc12gal14acglcgalgluside_hs(g)            | (Gal)2 (GalNAc)1 (Glc)1 (GlcNAc)1 (LFuc)1 (Cer)1                  | Golgi Apparatus |
| 1413 | 22669g       | acgalfucgalacgalfuc12gal14acglcgalgluside_hs(g) | Type IIIA glycolipid                                              | Golgi Apparatus |

| Row  | Metabolite # | Abbreviation                                                  | Metabolite Name                                              | Compartment     |
|------|--------------|---------------------------------------------------------------|--------------------------------------------------------------|-----------------|
| 1414 | 22681g       | acgalfucgalacgalfu<br>cgalacglcgal14acgl<br>cgalgluside_hs(g) | Type IIIAb                                                   | Golgi Apparatus |
| 1415 | 22678g       | acgalfucgalacglcgal<br>14acglcgalgluside_<br>hs(g)            | (Gal)3 (GalNAc)1 (Glc)1 (GlcNAc)2 (LFuc)1 (Cer)1             | Golgi Apparatus |
| 1416 | 22656g       | acgalfucgalacglcgal<br>gluside_hs(g)                          | Type IA glycolipid                                           | Golgi Apparatus |
| 1417 | 19740g       | acgbgbside_hs(g)                                              | beta GalNAc globoside (homo sapiens)                         | Golgi Apparatus |
| 1418 | 22686g       | acglc13galacglcgal<br>14acglcgalgluside_<br>hs(g)             | nLc7Cer                                                      | Golgi Apparatus |
| 1419 | 22671g       | acglcgal14acglcgal<br>gluside_hs(g)                           | nLc5Cer                                                      | Golgi Apparatus |
| 1420 | 22673g       | acglcgalacglcgal14<br>acglcgalgluside_hs(<br>g)               | (Gal)3 (Glc)1 (GlcNAc)3 (Cer)1                               | Golgi Apparatus |
| 1421 | 19743g       | acglcgalgbside_hs(<br>g)                                      | GlcNAc-Gal globoside (homo sapiens)                          | Golgi Apparatus |
| 1422 | 22647g       | acglcgalgluside_hs(<br>g)                                     | (Gal)1 (Glc)1 (GlcNAc)1 (Cer)1                               | Golgi Apparatus |
| 1423 | 19741g       | acn13acngalgbside<br>_hs(g)                                   | sialyl (1,3) sialyl (2,6) galactosylgloboside (homo sapiens) | Golgi Apparatus |
| 1424 | 19742g       | acn23acngalgbside<br>_hs(g)                                   | sialyl (2,3) sialyl (2,6) galactosylgloboside (homo sapiens) | Golgi Apparatus |
| 1425 | 22662g       | acnacngal14acglcg<br>algluside_hs(g)                          | 3',8'-LD1                                                    | Golgi Apparatus |
| 1426 | 19738g       | acnacngalgbside_h<br>s(g)                                     | disialyl galactosylgloboside (homo sapiens)                  | Golgi Apparatus |
| 1427 | 22661g       | acngal14acglcgalgl<br>uside_hs(g)                             | Sialyl-3-paragloboside                                       | Golgi Apparatus |
| 1428 | 22682g       | acngalacglcgal14ac<br>glcgalgluside_hs(g)                     | VI3NeuAc-nLc6Cer                                             | Golgi Apparatus |
| 1429 | 22654g       | acngalacglcgalglusi<br>de_hs(g)                               | (Gal)3 (Glc)1 (GlcNAc)1 (Cer)1                               | Golgi Apparatus |
| 1430 | 19737g       | acngalgbside_hs(g)                                            | sialyl galactosylgloboside (homo sapiens)                    | Golgi Apparatus |
| 1431 | 309g         | amp(g)                                                        | AMP                                                          | Golgi Apparatus |
| 1432 | 8980g        | camp(g)                                                       | cAMP                                                         | Golgi Apparatus |
| 1433 | 1075g        | chol(g)                                                       | Choline                                                      | Golgi Apparatus |
| 1434 | 9019g        | cholp(g)                                                      | Choline phosphate                                            | Golgi Apparatus |
| 1435 | 252g         | chsterol(g)                                                   | Cholesterol                                                  | Golgi Apparatus |
| 1436 | 11376g       | cmp(g)                                                        | CMP                                                          | Golgi Apparatus |
| 1437 | 1088g        | cmpacna(g)                                                    | CMP-N-acetylneuraminate                                      | Golgi Apparatus |
| 1438 | 474g         | co2(g)                                                        | CO2                                                          | Golgi Apparatus |
| 1439 | 473g         | coa(g)                                                        | Coenzyme A                                                   | Golgi Apparatus |
| 1440 | 15793g       | core2(g)                                                      | Core 2                                                       | Golgi Apparatus |
| 1441 | 15796g       | core3(g)                                                      | Core 3                                                       | Golgi Apparatus |
| 1442 | 15797g       | core4(g)                                                      | Core 4                                                       | Golgi Apparatus |
| 1443 | 15887g       | core5(g)                                                      | Core 5                                                       | Golgi Apparatus |



| Row  | Metabolite # | Abbreviation     | Metabolite Name                                                                                    | Compartment     |
|------|--------------|------------------|----------------------------------------------------------------------------------------------------|-----------------|
| 1444 | 15798g       | core6(g)         | Core 6                                                                                             | Golgi Apparatus |
| 1445 | 15888g       | core7(g)         | Core 7                                                                                             | Golgi Apparatus |
| 1446 | 15886g       | core8(g)         | Core 8                                                                                             | Golgi Apparatus |
| 1447 | 19478g       | crm_hs(g)        | ceramide (homo sapiens)                                                                            | Golgi Apparatus |
| 1448 | 20499g       | cs_hs_linkage(g) | chondroitin sulfate/heparan sulfate linkage region (GlcA-(Gal)2-Xyl-L-Ser (protein))               | Golgi Apparatus |
| 1449 | 20538g       | cs_a,b,e_pre1(g) | chondroitin sulfate A (GalNAc4S-GlcA), B (IdoA2S-GalNAc4S), and E (GalNAc4,6diS-GlcA), precursor 1 | Golgi Apparatus |
| 1450 | 20539g       | cs_a,b_pre2(g)   | chondroitin sulfate A (GalNAc4S-GlcA) and B (IdoA2S-GalNAc4S), precursor 2                         | Golgi Apparatus |
| 1451 | 20540g       | cs_a,b_pre3(g)   | chondroitin sulfate A (GalNAc4S-GlcA) and B (IdoA2S-GalNAc4S), precursor 3                         | Golgi Apparatus |
| 1452 | 20597g       | cs_b_pre4(g)     | chondroitin sulfate B (IdoA2S-GalNAc4S), precursor 4                                               | Golgi Apparatus |
| 1453 | 20598g       | cs_b_pre5(g)     | chondroitin sulfate B (IdoA2S-GalNAc4s), precursor 5                                               | Golgi Apparatus |
| 1454 | 20542g       | cs_c,d,e_pre1(g) | chondroitin sulfate C (GalNAc6S-GlcA) and D (GlcNAc6S-GlcA2S), precursor 1                         | Golgi Apparatus |
| 1455 | 20543g       | cs_c_pre2(g)     | chondroitin sulfate C (GalNAc6S-GlcA), precursor 2                                                 | Golgi Apparatus |
| 1456 | 20544g       | cs_c_pre3(g)     | chondroitin sulfate C (GalNAc6S-GlcA), precursor 3                                                 | Golgi Apparatus |
| 1457 | 20550g       | cs_d_pre2(g)     | chondroitin sulfate D (GlcNAc6S-GlcA2S) precursor 2                                                | Golgi Apparatus |
| 1458 | 20551g       | cs_d_pre3(g)     | chondroitin sulfate D (GlcNAc6S-GlcA2S), precursor 3                                               | Golgi Apparatus |
| 1459 | 20552g       | cs_d_pre4(g)     | chondroitin sulfate D (GlcNAc6S-GlcA2S), precursor 4                                               | Golgi Apparatus |
| 1460 | 20553g       | cs_d_pre5(g)     | chondroitin sulfate D (GlcNAc6S-GlcA2S), precursor 5                                               | Golgi Apparatus |
| 1461 | 20546g       | cs_e_pre2(g)     | chondroitin sulfate E (GalNAc4,6diS-GlcA), precursor 2                                             | Golgi Apparatus |
| 1462 | 20547g       | cs_e_pre3(g)     | chondroitin sulfate E (GalNAc4,6diS-GlcA), precursor 3                                             | Golgi Apparatus |
| 1463 | 20548g       | cs_e_pre4(g)     | chondroitin sulfate E (GalNAc4,6diS-GlcA), precursor 4                                             | Golgi Apparatus |
| 1464 | 20591g       | cs_e_pre5a(g)    | chondroitin sulfate E (GalNAc4,6diS-GlcA), precursor 5a                                            | Golgi Apparatus |
| 1465 | 20594g       | cs_e_pre5b(g)    | chondroitin sulfate E (GalNAc4,6diS-GlcA), precursor 5b                                            | Golgi Apparatus |
| 1466 | 20537g       | cs_pre(g)        | chondroitin sulfate precursor (GalNAc-GlcA-(Gal)2-Xyl-L-Ser (protein))                             | Golgi Apparatus |
| 1467 | 20541g       | cspg_a(g)        | chondroitin sulfate A (GalNAc4S-GlcA) proteoglycan                                                 | Golgi Apparatus |
| 1468 | 20599g       | cspg_b(g)        | chondroitin sulfate B / dermatan sulfate (IdoA2S-GalNAc4S) proteoglycan                            | Golgi Apparatus |
| 1469 | 20545g       | cspg_c(g)        | chondroitin sulfate C (GalNAc6S-GlcA) proteoglycan                                                 | Golgi Apparatus |
| 1470 | 20554g       | cspg_d(g)        | chondroitin sulfate D (GlcNAc6S-GlcA2S) proteoglycan                                               | Golgi Apparatus |
| 1471 | 20549g       | cspg_e(g)        | chondroitin sulfate E (GalNAc4,6diS-GlcA) proteoglycan                                             | Golgi Apparatus |

| Row  | Metabolite # | Abbreviation                                          | Metabolite Name                                                                                                                                                                                                                                     | Compartment     |
|------|--------------|-------------------------------------------------------|-----------------------------------------------------------------------------------------------------------------------------------------------------------------------------------------------------------------------------------------------------|-----------------|
| 1472 | 4544g        | digalsgalside_hs(g)                                   | Digalactosylceramidesulfate                                                                                                                                                                                                                         | Golgi Apparatus |
| 1473 | 19810g       | digalside_hs(g)                                       | Digalactosylceramide                                                                                                                                                                                                                                | Golgi Apparatus |
| 1474 | 14993g       | dolglcp_U(g)                                          | Dolichyl beta-D-glucosyl phosphate, human uterine homolog                                                                                                                                                                                           | Golgi Apparatus |
| 1475 | 14989g       | dolp_U(g)                                             | Dolichol phosphate, human uterine homolog                                                                                                                                                                                                           | Golgi Apparatus |
| 1476 | 15795g       | dsT_antigen(g)                                        | disialyl-T antigen                                                                                                                                                                                                                                  | Golgi Apparatus |
| 1477 | 15885g       | f1a(g)                                                | F1alpha                                                                                                                                                                                                                                             | Golgi Apparatus |
| 1478 | 15195g       | fn2m2masn(g)                                          | N4-{N-Acetyl-beta-D-glucosaminyl-(1,2)-alpha-D-mannosyl-(1,3)-[N-acetyl-beta-D-glucosaminyl-(1,2)-alpha-D-mannosyl-(1,6)]-beta-D-mannosyl-(1,4)-N-acetyl-beta-D-glucosaminyl-(1,4)-[alpha-L-fucosyl-(1,6)]-N-acetyl-beta-D-glucosaminyl} asparagine | Golgi Apparatus |
| 1479 | 22664g       | fuc12gal14acglcgalgluside_hs(g)                       | Type IIIH glycolipid                                                                                                                                                                                                                                | Golgi Apparatus |
| 1480 | 22692g       | fuc132galacglcgal14acglcgalgluside_hs(g)              | V3Fuc-nLc6Cer                                                                                                                                                                                                                                       | Golgi Apparatus |
| 1481 | 22691g       | fuc13galacglcgal14acglcgalgluside_hs(g)               | III3Fuc-nLc6Cer                                                                                                                                                                                                                                     | Golgi Apparatus |
| 1482 | 22658g       | fuc14galacglcgalgluside_hs(g)                         | Lea glycolipid                                                                                                                                                                                                                                      | Golgi Apparatus |
| 1483 | 22657g       | fucacgalfucgalacglcgalgluside_hs(g)                   | (Gal)2 (GalNAc)1 (Glc)1 (GlcNAc)1 (LFuc)2 (Cer)1                                                                                                                                                                                                    | Golgi Apparatus |
| 1484 | 22663g       | fucacngal14acglcgalgluside_hs(g)                      | IV3-a-NeuAc,III3-a-Fuc-nLc4Cer                                                                                                                                                                                                                      | Golgi Apparatus |
| 1485 | 22655g       | fucacngalacglcgalgluside_hs(g)                        | IV3-a-Neu5Ac,III4-a-Fuc-Lc4Cer                                                                                                                                                                                                                      | Golgi Apparatus |
| 1486 | 22665g       | fucfuc12gal14acglcgalgluside_hs(g)                    | Ley glycolipid                                                                                                                                                                                                                                      | Golgi Apparatus |
| 1487 | 22693g       | fucfuc132galacglcgal14acglcgalgluside_hs(g)           | V3Fuc,III3Fuc-nLc6Cer                                                                                                                                                                                                                               | Golgi Apparatus |
| 1488 | 22690g       | fucfucfucgalacglc13galacglcgal14acglcgalgluside_hs(g) | (Gal)4 (Glc)1 (GlcNAc)3 (LFuc)3 (Cer)1                                                                                                                                                                                                              | Golgi Apparatus |
| 1489 | 22685g       | fucfucfucgalacglcgal14acglcgalgluside_hs(g)           | (Gal)3 (Glc)1 (GlcNAc)2 (LFuc)3 (Cer)1                                                                                                                                                                                                              | Golgi Apparatus |
| 1490 | 22689g       | fucfucgalacglc13galacglcgal14acglcgalgluside_hs(g)    | (Gal)4 (Glc)1 (GlcNAc)3 (LFuc)2 (Cer)1                                                                                                                                                                                                              | Golgi Apparatus |
| 1491 | 22684g       | fucfucgalacglcgal14acglcgalgluside_hs(g)              | (Gal)3 (Glc)1 (GlcNAc)2 (LFuc)2 (Cer)1                                                                                                                                                                                                              | Golgi Apparatus |
| 1492 | 22675g       | fucfucgalacglcgal14acglcgalgluside_hs(g)              | (Gal)4 (Glc)1 (GlcNAc)3 (LFuc)2 (Cer)1                                                                                                                                                                                                              | Golgi Apparatus |

| Row  | Metabolite # | Abbreviation                                     | Metabolite Name                                                                                                     | Compartment     |
|------|--------------|--------------------------------------------------|---------------------------------------------------------------------------------------------------------------------|-----------------|
| 1493 | 22650g       | fucfucgalacglcgalgluside_hs(g)                   | Leb glycolipid                                                                                                      | Golgi Apparatus |
| 1494 | 22660g       | fucgal14acglcgalgluside_hs(g)                    | Lacto-N-fucopentaosyl III ceramide                                                                                  | Golgi Apparatus |
| 1495 | 22668g       | fucgalacgalfuc12gal14acglcgalgluside_hs(g)       | Type IIIH glycolipid                                                                                                | Golgi Apparatus |
| 1496 | 22680g       | fucgalacgalfucgalacglcgal14acglcgalgluside_hs(g) | (Gal)4 (GalNAc)1 (Glc)1 (GlcNAc)2 (LFuc)2 (Cer)1                                                                    | Golgi Apparatus |
| 1497 | 22688g       | fucgalacglc13galacglcgal14acglcgalgluside_hs(g)  | (Gal)4 (Glc)1 (GlcNAc)3 (LFuc)1 (Cer)1                                                                              | Golgi Apparatus |
| 1498 | 22677g       | fucgalacglcgal14acglcgalgluside_hs(g)            | VI2Fuc-nLc6                                                                                                         | Golgi Apparatus |
| 1499 | 22649g       | fucgalacglcgalgluside_hs(g)                      | Type IH glycolipid                                                                                                  | Golgi Apparatus |
| 1500 | 22652g       | fucgalfucgalacglcgalgluside_hs(g)                | (Gal)3 (Glc)1 (GlcNAc)1 (LFuc)2 (Cer)1                                                                              | Golgi Apparatus |
| 1501 | 19746g       | fucgalgbside_hs(g)                               | fucosyl galactosylglobside (homo sapiens)                                                                           | Golgi Apparatus |
| 1502 | 15443g       | g1m6masnB1(g)                                    | glucosyl-(alpha-D-mannosyl)6-beta-D-mannosyl-diacetylchitobiosyl-L-asparagine (protein)                             | Golgi Apparatus |
| 1503 | 15442g       | g1m7masnB(g)                                     | glucosyl-(alpha-D-mannosyl)7-beta-D-mannosyl-diacetylchitobiosyl-L-asparagine, isoform B (protein)                  | Golgi Apparatus |
| 1504 | 15441g       | g1m7masnC(g)                                     | glucosyl-(alpha-D-mannosyl)7-beta-D-mannosyl-diacetylchitobiosyl-L-asparagine, isoform C (protein)                  | Golgi Apparatus |
| 1505 | 15142g       | g1m8masn(g)                                      | (alpha-D-Glucosyl)-(alpha-D-mannosyl)8-beta-D-mannosyl-diacetylchitobiosyl-L-asparagine (protein)                   | Golgi Apparatus |
| 1506 | 15138g       | g2m8masn(g)                                      | (alpha-D-Glucosyl)2-(alpha-D-mannosyl)8-beta-D-mannosyl-diacetylchitobiosyl-L-asparagine (protein)                  | Golgi Apparatus |
| 1507 | 15115g       | g3m8masn(g)                                      | (alpha-D-Glucosyl)3-(alpha-D-mannosyl)8-beta-D-mannosyl-diacetylchitobiosyl-L-asparagine (protein)                  | Golgi Apparatus |
| 1508 | 15024g       | g3m8mpdol_U(g)                                   | (alpha-D-Glucosyl)3-(alpha-D-mannosyl)8-beta-D-mannosyl-diacetylchitobiosyldiphosphodolichol, human uterine homolog | Golgi Apparatus |
| 1509 | 19751g       | ga1_hs(g)                                        | GA1 (homo sapiens)                                                                                                  | Golgi Apparatus |
| 1510 | 19750g       | ga2_hs(g)                                        | GA2 (homo sapiens)                                                                                                  | Golgi Apparatus |
| 1511 | 22659g       | gal14acglcgalgluside_hs(g)                       | Lactoneotetraosylceramide                                                                                           | Golgi Apparatus |
| 1512 | 22667g       | galacgalfuc12gal14acglcgalgluside_hs(g)          | (Gal)3 (GalNAc)1 (Glc)1 (GlcNAc)1 (LFuc)1 (Cer)1                                                                    | Golgi Apparatus |
| 1513 | 22679g       | galacgalfucgalacglcgal14acglcgalgluside_hs(g)    | (Gal)4 (GalNAc)1 (Glc)1 (GlcNAc)2 (LFuc)1 (Cer)1                                                                    | Golgi Apparatus |

| Row  | Metabolite # | Abbreviation                                           | Metabolite Name                                      | Compartment     |
|------|--------------|--------------------------------------------------------|------------------------------------------------------|-----------------|
| 1514 | 22687g       | galacglc13galacglcgal14acglcgalgluside_hs(g)           | nLc8Cer                                              | Golgi Apparatus |
| 1515 | 22672g       | galacglcgal14acglcgalgluside_hs(g)                     | i-antigen                                            | Golgi Apparatus |
| 1516 | 22674g       | galacglcgalacglcgal14acglcgalgluside_hs(g)             | I-antigen                                            | Golgi Apparatus |
| 1517 | 19744g       | galacglcgalgbside_hs(g)                                | Gal-GlcNAc-Gal globoside (homo sapiens)              | Golgi Apparatus |
| 1518 | 22648g       | galacglcgalgluside_hs(g)                               | Lc4Cer                                               | Golgi Apparatus |
| 1519 | 22670g       | galfuc12gal14acglcgalgluside_hs(g)                     | (Gal)3 (Glc)1 (GlcNAc)1 (LFuc)1 (Cer)1               | Golgi Apparatus |
| 1520 | 22683g       | galfucgalacglcgal14acglcgalgluside_hs(g)               | (Gal)4 (Glc)1 (GlcNAc)2 (LFuc)1 (Cer)1               | Golgi Apparatus |
| 1521 | 22651g       | galfucgalacglcgalgluside_hs(g)                         | Type IB glycolipid                                   | Golgi Apparatus |
| 1522 | 22676g       | galgalfucfucgalacglcgalacglcgal14acglcgalgluside_hs(g) | (Gal)6 (Glc)1 (GlcNAc)3 (LFuc)2 (Cer)1               | Golgi Apparatus |
| 1523 | 19735g       | galgalthcrm_hs(g)                                      | Gal-Gal-Gal-Gal-Gal-Glc-Cer (homo sapiens)           | Golgi Apparatus |
| 1524 | 19734g       | galgalthcrm_hs(g)                                      | Gal-Gal-Gal-Gal-Glc-Cer (homo sapiens)               | Golgi Apparatus |
| 1525 | 19736g       | galgbside_hs(g)                                        | galactosylgloboside (homo sapiens)                   | Golgi Apparatus |
| 1526 | 19619g       | galgluside_hs(g)                                       | galactosyl glucosyl ceramide                         | Golgi Apparatus |
| 1527 | 19614g       | galside_hs(g)                                          | galactocerebroside (homo sapiens)                    | Golgi Apparatus |
| 1528 | 19733g       | galthcrm_hs(g)                                         | Gal-Gal-Gal-Glc-Cer (homo sapiens)                   | Golgi Apparatus |
| 1529 | 19624g       | gbside_hs(g)                                           | globoside (homo sapiens)                             | Golgi Apparatus |
| 1530 | 19747g       | gd1a_hs(g)                                             | GD1a (homo sapiens)                                  | Golgi Apparatus |
| 1531 | 19769g       | gd1alpha_hs(g)                                         | GD1a (homo sapiens)                                  | Golgi Apparatus |
| 1532 | 19757g       | gd1b2_hs(g)                                            | GD1beta (homo sapiens)                               | Golgi Apparatus |
| 1533 | 19761g       | gd1b_hs(g)                                             | GD1b (homo sapiens)                                  | Golgi Apparatus |
| 1534 | 19754g       | gd1c_hs(g)                                             | GD1c (homo sapiens)                                  | Golgi Apparatus |
| 1535 | 19760g       | gd2_hs(g)                                              | GD2 (homo sapiens)                                   | Golgi Apparatus |
| 1536 | 19759g       | gd3_hs(g)                                              | GD3 (homo sapiens)                                   | Golgi Apparatus |
| 1537 | 321g         | gdp(g)                                                 | GDP                                                  | Golgi Apparatus |
| 1538 | 168g         | gdpfuc(g)                                              | GDP-L-fucose                                         | Golgi Apparatus |
| 1539 | 318g         | glc-D(g)                                               | D-Glucose                                            | Golgi Apparatus |
| 1540 | 15438g       | glc1man(g)                                             | glucose-1,3-mannose oligosaccharide                  | Golgi Apparatus |
| 1541 | 15437g       | glc2man(g)                                             | (2)[glucose-1,3]-mannose oligosaccharide             | Golgi Apparatus |
| 1542 | 15433g       | glc3man(g)                                             | glucose-1,2-(2)[glucose-1,3]-mannose oligosaccharide | Golgi Apparatus |
| 1543 | 19613g       | gluside_hs(g)                                          | glucocerebroside (homo sapiens)                      | Golgi Apparatus |
| 1544 | 19622g       | gm1_hs(g)                                              | ganglioside GM1 (homo sapiens)                       | Golgi Apparatus |
| 1545 | 19756g       | gm1a_hs(g)                                             | GM1alpha (homo sapiens)                              | Golgi Apparatus |
| 1546 | 19752g       | gm1b_hs(g)                                             | GM1b (homo sapiens)                                  | Golgi Apparatus |
| 1547 | 19621g       | gm2_hs(g)                                              | ganglioside GM2 (homo sapiens)                       | Golgi Apparatus |
| 1548 | 19755g       | gm2a_hs(g)                                             | GM2alpha (homo sapiens)                              | Golgi Apparatus |
| 1549 | 19620g       | gm3_hs(g)                                              | ganglioside GM3 (homo sapiens)                       | Golgi Apparatus |

| Row  | Metabolite # | Abbreviation    | Metabolite Name                              | Compartment     |
|------|--------------|-----------------|----------------------------------------------|-----------------|
| 1550 | 226g         | gmp(g)          | GMP                                          | Golgi Apparatus |
| 1551 | 15935g       | gncore1(g)      | GlcNAc-alpha-1,4-Core 1                      | Golgi Apparatus |
| 1552 | 15932g       | gncore2(g)      | GlcNAc-alpha-1,4-Core 2                      | Golgi Apparatus |
| 1553 | 19768g       | gp1c_hs(g)      | GP1c (homo sapiens)                          | Golgi Apparatus |
| 1554 | 19976g       | gp1calpha_hs(g) | GP1c alpha (homo sapiens)                    | Golgi Apparatus |
| 1555 | 19763g       | gq1b_hs(g)      | GQ1b (homo sapiens)                          | Golgi Apparatus |
| 1556 | 19771g       | gq1balpha_hs(g) | GQ1balpha (homo sapiens)                     | Golgi Apparatus |
| 1557 | 19767g       | gq1c_hs(g)      | GQ1c (homo sapiens)                          | Golgi Apparatus |
| 1558 | 19749g       | gt1a_hs(g)      | GT1a (homo sapiens)                          | Golgi Apparatus |
| 1559 | 19770g       | gt1alpha_hs(g)  | GT1alpha (homo sapiens)                      | Golgi Apparatus |
| 1560 | 19762g       | gt1b_hs(g)      | GT1b (homo sapiens)                          | Golgi Apparatus |
| 1561 | 19766g       | gt1c_hs(g)      | GT1c (homo sapiens)                          | Golgi Apparatus |
| 1562 | 19765g       | gt2_hs(g)       | GT2 (homo sapiens)                           | Golgi Apparatus |
| 1563 | 19764g       | gt3_hs(g)       | GT3 (homo sapiens)                           | Golgi Apparatus |
| 1564 | 1049g        | h(g)            | H+                                           | Golgi Apparatus |
| 1565 | 317g         | h2o(g)          | H2O                                          | Golgi Apparatus |
| 1566 | 3844g        | hcys-L(g)       | L-Homocysteine                               | Golgi Apparatus |
| 1567 | 20618g       | hs_pre1(g)      | heparan sulfate, precursor 1                 | Golgi Apparatus |
| 1568 | 20627g       | hs_pre10(g)     | heparan sulfate, precursor 10                | Golgi Apparatus |
| 1569 | 20628g       | hs_pre11(g)     | heparan sulfate, precursor 11                | Golgi Apparatus |
| 1570 | 20629g       | hs_pre12(g)     | heparan sulfate, precursor 12                | Golgi Apparatus |
| 1571 | 20630g       | hs_pre13(g)     | heparan sulfate, precursor 13                | Golgi Apparatus |
| 1572 | 20718g       | hs_pre14(g)     | heparan sulfate, precursor 14                | Golgi Apparatus |
| 1573 | 20719g       | hs_pre15(g)     | heparan sulfate, precursor 15                | Golgi Apparatus |
| 1574 | 20619g       | hs_pre2(g)      | heparan sulfate, precursor 2                 | Golgi Apparatus |
| 1575 | 20620g       | hs_pre3(g)      | heparan sulfate, precursor 3                 | Golgi Apparatus |
| 1576 | 20621g       | hs_pre4(g)      | heparan sulfate, precursor 4                 | Golgi Apparatus |
| 1577 | 20622g       | hs_pre5(g)      | heparan sulfate, precursor 5                 | Golgi Apparatus |
| 1578 | 20623g       | hs_pre6(g)      | heparan sulfate, precursor 6                 | Golgi Apparatus |
| 1579 | 20624g       | hs_pre7(g)      | heparan sulfate, precursor 7                 | Golgi Apparatus |
| 1580 | 20625g       | hs_pre8(g)      | heparan sulfate, precursor 8                 | Golgi Apparatus |
| 1581 | 20626g       | hs_pre9(g)      | heparan sulfate, precursor 9                 | Golgi Apparatus |
| 1582 | 20638g       | hspg(g)         | heparan sulfate proteoglycan                 | Golgi Apparatus |
| 1583 | 289g         | k(g)            | potassium                                    | Golgi Apparatus |
| 1584 | 20192g       | ksi(g)          | keratan sulfate I                            | Golgi Apparatus |
| 1585 | 20131g       | ksi_pre1(g)     | keratan sulfate I biosynthesis, precursor 1  | Golgi Apparatus |
| 1586 | 20165g       | ksi_pre10(g)    | keratan sulfate I biosynthesis, precursor 10 | Golgi Apparatus |
| 1587 | 20166g       | ksi_pre11(g)    | keratan sulfate I biosynthesis, precursor 11 | Golgi Apparatus |
| 1588 | 20167g       | ksi_pre12(g)    | keratan sulfate I biosynthesis, precursor 12 | Golgi Apparatus |
| 1589 | 20168g       | ksi_pre13(g)    | keratan sulfate I biosynthesis, precursor 13 | Golgi Apparatus |
| 1590 | 20169g       | ksi_pre14(g)    | keratan sulfate I biosynthesis, precursor 14 | Golgi Apparatus |
| 1591 | 20170g       | ksi_pre15(g)    | keratan sulfate I biosynthesis, precursor 15 | Golgi Apparatus |
| 1592 | 20171g       | ksi_pre16(g)    | keratan sulfate I biosynthesis, precursor 16 | Golgi Apparatus |
| 1593 | 20172g       | ksi_pre17(g)    | keratan sulfate I biosynthesis, precursor 17 | Golgi Apparatus |
| 1594 | 20173g       | ksi_pre18(g)    | keratan sulfate I biosynthesis, precursor 18 | Golgi Apparatus |
| 1595 | 20174g       | ksi_pre19(g)    | keratan sulfate I biosynthesis, precursor 19 | Golgi Apparatus |
| 1596 | 20132g       | ksi_pre2(g)     | keratan sulfate I biosynthesis, precursor 2  | Golgi Apparatus |
| 1597 | 20175g       | ksi_pre20(g)    | keratan sulfate I biosynthesis, precursor 20 | Golgi Apparatus |
| 1598 | 20176g       | ksi_pre21(g)    | keratan sulfate I biosynthesis, precursor 21 | Golgi Apparatus |
| 1599 | 20177g       | ksi_pre22(g)    | keratan sulfate I biosynthesis, precursor 22 | Golgi Apparatus |
| 1600 | 20178g       | ksi_pre23(g)    | keratan sulfate I biosynthesis, precursor 23 | Golgi Apparatus |
| 1601 | 20179g       | ksi_pre24(g)    | keratan sulfate I biosynthesis, precursor 24 | Golgi Apparatus |
| 1602 | 20180g       | ksi_pre25(g)    | keratan sulfate I biosynthesis, precursor 25 | Golgi Apparatus |

| Row  | Metabolite # | Abbreviation        | Metabolite Name                               | Compartment     |
|------|--------------|---------------------|-----------------------------------------------|-----------------|
| 1603 | 20181g       | ksi_pre26(g)        | keratan sulfate I biosynthesis, precursor 26  | Golgi Apparatus |
| 1604 | 20182g       | ksi_pre27(g)        | keratan sulfate I biosynthesis, precursor 27  | Golgi Apparatus |
| 1605 | 20183g       | ksi_pre28(g)        | keratan sulfate I biosynthesis, precursor 28  | Golgi Apparatus |
| 1606 | 20184g       | ksi_pre29(g)        | keratan sulfate I biosynthesis, precursor 29  | Golgi Apparatus |
| 1607 | 20133g       | ksi_pre3(g)         | keratan sulfate I biosynthesis, precursor 3   | Golgi Apparatus |
| 1608 | 20185g       | ksi_pre30(g)        | keratan sulfate I biosynthesis, precursor 30  | Golgi Apparatus |
| 1609 | 20186g       | ksi_pre31(g)        | keratan sulfate I biosynthesis, precursor 31  | Golgi Apparatus |
| 1610 | 20187g       | ksi_pre32(g)        | keratan sulfate I biosynthesis, precursor 32  | Golgi Apparatus |
| 1611 | 20188g       | ksi_pre33(g)        | keratan sulfate I biosynthesis, precursor 33  | Golgi Apparatus |
| 1612 | 20189g       | ksi_pre34(g)        | keratan sulfate I biosynthesis, precursor 34  | Golgi Apparatus |
| 1613 | 20190g       | ksi_pre35(g)        | keratan sulfate I biosynthesis, precursor 35  | Golgi Apparatus |
| 1614 | 20191g       | ksi_pre36(g)        | keratan sulfate I biosynthesis, precursor 36  | Golgi Apparatus |
| 1615 | 20159g       | ksi_pre4(g)         | keratan sulfate I biosynthesis, precursor 4   | Golgi Apparatus |
| 1616 | 20160g       | ksi_pre5(g)         | keratan sulfate I biosynthesis, precursor 5   | Golgi Apparatus |
| 1617 | 20161g       | ksi_pre6(g)         | keratan sulfate I biosynthesis, precursor 6   | Golgi Apparatus |
| 1618 | 20162g       | ksi_pre7(g)         | keratan sulfate I biosynthesis, precursor 7   | Golgi Apparatus |
| 1619 | 20163g       | ksi_pre8(g)         | keratan sulfate I biosynthesis, precursor 8   | Golgi Apparatus |
| 1620 | 20164g       | ksi_pre9(g)         | keratan sulfate I biosynthesis, precursor 9   | Golgi Apparatus |
| 1621 | 20156g       | ksii_core2(g)       | keratan sulfate II (core 2-linked)            | Golgi Apparatus |
| 1622 | 20079g       | ksii_core2_pre1(g)  | keratan sulfate II biosynthesis, precursor 1  | Golgi Apparatus |
| 1623 | 20155g       | ksii_core2_pre10(g) | keratan sulfate II biosynthesis, precursor 10 | Golgi Apparatus |
| 1624 | 20085g       | ksii_core2_pre2(g)  | keratan sulfate II biosynthesis, precursor 2  | Golgi Apparatus |
| 1625 | 20134g       | ksii_core2_pre3(g)  | keratan sulfate II biosynthesis, precursor 3  | Golgi Apparatus |
| 1626 | 20135g       | ksii_core2_pre4(g)  | keratan sulfate II biosynthesis, precursor 4  | Golgi Apparatus |
| 1627 | 20149g       | ksii_core2_pre5(g)  | keratan sulfate II biosynthesis, precursor 5  | Golgi Apparatus |
| 1628 | 20150g       | ksii_core2_pre6(g)  | keratan sulfate II biosynthesis, precursor 6  | Golgi Apparatus |
| 1629 | 20151g       | ksii_core2_pre7(g)  | keratan sulfate II biosynthesis, precursor 7  | Golgi Apparatus |
| 1630 | 20153g       | ksii_core2_pre8(g)  | keratan sulfate II biosynthesis, precursor 8  | Golgi Apparatus |
| 1631 | 20154g       | ksii_core2_pre9(g)  | keratan sulfate II biosynthesis, precursor 9  | Golgi Apparatus |
| 1632 | 20342g       | ksii_core4(g)       | keratan sulfate II (core 4-linked)            | Golgi Apparatus |
| 1633 | 20332g       | ksii_core4_pre1(g)  | keratan sulfate II biosynthesis, precursor 1  | Golgi Apparatus |
| 1634 | 20341g       | ksii_core4_pre10(g) | keratan sulfate II biosynthesis, precursor 10 | Golgi Apparatus |
| 1635 | 20333g       | ksii_core4_pre2(g)  | keratan sulfate II biosynthesis, precursor 2  | Golgi Apparatus |
| 1636 | 20334g       | ksii_core4_pre3(g)  | keratan sulfate II biosynthesis, precursor 3  | Golgi Apparatus |
| 1637 | 20335g       | ksii_core4_pre4(g)  | keratan sulfate II biosynthesis, precursor 4  | Golgi Apparatus |
| 1638 | 20336g       | ksii_core4_pre5(g)  | keratan sulfate II biosynthesis, precursor 5  | Golgi Apparatus |

| Row  | Metabolite # | Abbreviation       | Metabolite Name                                                                                                                                                                                      | Compartment     |
|------|--------------|--------------------|------------------------------------------------------------------------------------------------------------------------------------------------------------------------------------------------------|-----------------|
| 1639 | 20337g       | ksii_core4_pre6(g) | keratan sulfate II biosynthesis, precursor 6                                                                                                                                                         | Golgi Apparatus |
| 1640 | 20338g       | ksii_core4_pre7(g) | keratan sulfate II biosynthesis, precursor 7                                                                                                                                                         | Golgi Apparatus |
| 1641 | 20339g       | ksii_core4_pre8(g) | keratan sulfate II biosynthesis, precursor 8                                                                                                                                                         | Golgi Apparatus |
| 1642 | 20340g       | ksii_core4_pre9(g) | keratan sulfate II biosynthesis, precursor 9                                                                                                                                                         | Golgi Apparatus |
| 1643 | 15198g       | l2fn2m2masn(g)     | {[galactosyl-(1,4)-N-Acetyl-glucosaminy-(1,2)-mannosyl-(1,3)-],[N-acetyl-glucosaminy-(1,2)-mannosyl-(1,6)-]mannosyl-(1,4)-N-acetyl-glucosaminy-(1,4)-[fucosyl-(1,6)]-N-acetyl-glucosaminy}asparagine | Golgi Apparatus |
| 1644 | 20459g       | l2xser(g)          | (Gal)2-Xyl-L-Ser (protein)                                                                                                                                                                           | Golgi Apparatus |
| 1645 | 292g         | lcts(g)            | Lactose                                                                                                                                                                                              | Golgi Apparatus |
| 1646 | 20364g       | lxser(g)           | Gal-Xyl-L-Ser (protein)                                                                                                                                                                              | Golgi Apparatus |
| 1647 | 15154g       | m4masn(g)          | (alpha-D-mannosyl)4-beta-D-mannosyl-diacetylchitobiosyl-L-asparagine (protein)                                                                                                                       | Golgi Apparatus |
| 1648 | 15170g       | m5masnB1(g)        | (alpha-D-mannosyl)5-beta-D-mannosyl-diacetylchitobiosyl-L-asparagine (protein)                                                                                                                       | Golgi Apparatus |
| 1649 | 15171g       | m5masnB2(g)        | (alpha-D-mannosyl)5-beta-D-mannosyl-diacetylchitobiosyl-L-asparagine (protein)                                                                                                                       | Golgi Apparatus |
| 1650 | 15161g       | m5masnC(g)         | (alpha-D-mannosyl)5-beta-D-mannosyl-diacetylchitobiosyl-L-asparagine (protein)                                                                                                                       | Golgi Apparatus |
| 1651 | 15167g       | m6masnA(g)         | (alpha-D-mannosyl)6-beta-D-mannosyl-diacetylchitobiosyl-L-asparagine (protein)                                                                                                                       | Golgi Apparatus |
| 1652 | 15168g       | m6masnB1(g)        | (alpha-D-mannosyl)6-beta-D-mannosyl-diacetylchitobiosyl-L-asparagine (protein)                                                                                                                       | Golgi Apparatus |
| 1653 | 15169g       | m6masnB2(g)        | (alpha-D-mannosyl)6-beta-D-mannosyl-diacetylchitobiosyl-L-asparagine (protein)                                                                                                                       | Golgi Apparatus |
| 1654 | 15160g       | m6masnC(g)         | (alpha-D-mannosyl)6-beta-D-mannosyl-diacetylchitobiosyl-L-asparagine (protein)                                                                                                                       | Golgi Apparatus |
| 1655 | 15165g       | m7masnA(g)         | (alpha-D-mannosyl)7-beta-D-mannosyl-diacetylchitobiosyl-L-asparagine, isoform A (protein)                                                                                                            | Golgi Apparatus |
| 1656 | 15159g       | m7masnB(g)         | (alpha-D-mannosyl)7-beta-D-mannosyl-diacetylchitobiosyl-L-asparagine, isoform B (protein)                                                                                                            | Golgi Apparatus |
| 1657 | 15166g       | m7masnC(g)         | (alpha-D-mannosyl)7-beta-D-mannosyl-diacetylchitobiosyl-L-asparagine, isoform C (protein)                                                                                                            | Golgi Apparatus |
| 1658 | 15144g       | m8masn(g)          | (alpha-D-mannosyl)8-beta-D-mannosyl-diacetylchitobiosyl-L-asparagine (protein)                                                                                                                       | Golgi Apparatus |
| 1659 | 11018g       | man(g)             | D-Mannose                                                                                                                                                                                            | Golgi Apparatus |
| 1660 | 15192g       | n2m2masn(g)        | ((N-acetyl-D-glucosaminy)2-(alpha-D-mannosyl)2-beta-D-mannosyl-diacetylchitobiosyl)-L-asparagine (protein)                                                                                           | Golgi Apparatus |
| 1661 | 3649g        | n2m2nmasn(g)       | N-Acetyl-beta-D-glucosaminy-1,2-alpha-D-mannosyl-1,3-(N-acetyl-beta-D-glucosaminy-1,2-alpha-D-mannosyl-1,6)-(N-acetyl-beta-D-glucosaminy-1,4)-beta-D-mannosyl-1,4-N-acetyl-beta-D-glucosaminy-L      | Golgi Apparatus |

| Row  | Metabolite # | Abbreviation     | Metabolite Name                                                                                            | Compartment     |
|------|--------------|------------------|------------------------------------------------------------------------------------------------------------|-----------------|
| 1662 | 15212g       | n3m2masn(g)      | ((N-acetyl-D-glucosaminy)3-(alpha-D-mannosyl)2-beta-D-mannosyl-diacetylchitobiosyl)-L-asparagine (protein) | Golgi Apparatus |
| 1663 | 15213g       | n4m2masn(g)      | ((N-acetyl-D-glucosaminy)4-(alpha-D-mannosyl)2-beta-D-mannosyl-diacetylchitobiosyl)-L-asparagine (protein) | Golgi Apparatus |
| 1664 | 15214g       | n5m2masn(g)      | ((N-acetyl-D-glucosaminy)5-(alpha-D-mannosyl)2-beta-D-mannosyl-diacetylchitobiosyl)-L-asparagine (protein) | Golgi Apparatus |
| 1665 | 1023g        | na1(g)           | Sodium                                                                                                     | Golgi Apparatus |
| 1666 | 4360g        | nm2masn(g)       | (N-acetyl-D-glucosaminy-(alpha-D-mannosyl)2-beta-D-mannosyl-diacetylchitobiosyl)-L-asparagine (protein)    | Golgi Apparatus |
| 1667 | 4358g        | nm4masn(g)       | (N-acetyl-D-glucosaminy-(alpha-D-mannosyl)4-beta-D-mannosyl-diacetylchitobiosyl)-L-asparagine (protein)    | Golgi Apparatus |
| 1668 | 20055g       | oagd3_hs(g)      | 9-O-Acetylated GD3 (homo sapiens)                                                                          | Golgi Apparatus |
| 1669 | 20056g       | oagt3_hs(g)      | 9-O-Acetylated GT3 (homo sapiens)                                                                          | Golgi Apparatus |
| 1670 | 18536g       | pa_hs(g)         | phosphatidic acid (homo sapiens)                                                                           | Golgi Apparatus |
| 1671 | 333g         | pap(g)           | Adenosine 3',5'-bisphosphate                                                                               | Golgi Apparatus |
| 1672 | 332g         | paps(g)          | 3'-Phosphoadenylyl sulfate                                                                                 | Golgi Apparatus |
| 1673 | 19051g       | pchol_hs(g)      | Phosphatidylcholine (homo sapiens)                                                                         | Golgi Apparatus |
| 1674 | 19050g       | pe_hs(g)         | phosphatidylethanolamine (homo sapiens)                                                                    | Golgi Apparatus |
| 1675 | 472g         | pi(g)            | Phosphate                                                                                                  | Golgi Apparatus |
| 1676 | 19052g       | ps_hs(g)         | phosphatidylserine (homo sapiens)                                                                          | Golgi Apparatus |
| 1677 | 15207g       | s2l2fn2m2masn(g) | PA6                                                                                                        | Golgi Apparatus |
| 1678 | 15794g       | sT_antigen(g)    | sialyl-T antigen                                                                                           | Golgi Apparatus |
| 1679 | 15789g       | sTn_antigen(g)   | sialyl-Tn antigen                                                                                          | Golgi Apparatus |
| 1680 | 19615g       | sgalside_hs(g)   | sulfatide galactocerebroside (homo sapiens)                                                                | Golgi Apparatus |
| 1681 | 19618g       | sphmyln_hs(g)    | sphingomyelin (homo sapiens)                                                                               | Golgi Apparatus |
| 1682 | 19623g       | thcrm_hs(g)      | trihexosyl ceramide (homo sapiens)                                                                         | Golgi Apparatus |
| 1683 | 326g         | uacgam(g)        | UDP-N-acetyl-D-glucosamine                                                                                 | Golgi Apparatus |
| 1684 | 477g         | udp(g)           | UDP                                                                                                        | Golgi Apparatus |
| 1685 | 10912g       | udpacgal(g)      | UDP-N-acetyl-D-galactosamine                                                                               | Golgi Apparatus |
| 1686 | 316g         | udpg(g)          | UDPglucose                                                                                                 | Golgi Apparatus |
| 1687 | 331g         | udpgal(g)        | UDPgalactose                                                                                               | Golgi Apparatus |
| 1688 | 241g         | udpglcur(g)      | UDP-D-glucuronate                                                                                          | Golgi Apparatus |
| 1689 | 255g         | udpxyl(g)        | UDP-D-xylose                                                                                               | Golgi Apparatus |
| 1690 | 1068g        | ump(g)           | UMP                                                                                                        | Golgi Apparatus |
| 1691 | 20363g       | xser(g)          | Xyl-L-Ser (protein)                                                                                        | Golgi Apparatus |
| 1692 | 2861         | 10fthf(l)        | 10-Formyltetrahydrofolate                                                                                  | Lysosome        |
| 1693 | 207861       | 10fthf5glu(l)    | 10-formyltetrahydrofolate-[Glu](5)                                                                         | Lysosome        |
| 1694 | 207871       | 10fthf6glu(l)    | 10-formyltetrahydrofolate-[Glu](6)                                                                         | Lysosome        |
| 1695 | 207881       | 10fthf7glu(l)    | 10-formyltetrahydrofolate-[Glu](7)                                                                         | Lysosome        |
| 1696 | 186041       | 3amp(l)          | 3'-AMP                                                                                                     | Lysosome        |
| 1697 | 1761         | 4abut(l)         | 4-Aminobutanoate                                                                                           | Lysosome        |
| 1698 | 207831       | 5dhf(l)          | pentaglutamyl folate (DHF)                                                                                 | Lysosome        |
| 1699 | 207801       | 5thf(l)          | pentaglutamyl folate (THF)                                                                                 | Lysosome        |
| 1700 | 207841       | 6dhf(l)          | hexaglutamyl folate (DHF)                                                                                  | Lysosome        |
| 1701 | 207811       | 6thf(l)          | hexaglutamyl folate (THF)                                                                                  | Lysosome        |
| 1702 | 207851       | 7dhf(l)          | heptaglutamyl folate (DHF)                                                                                 | Lysosome        |
| 1703 | 207821       | 7thf(l)          | heptaglutamyl folate (THF)                                                                                 | Lysosome        |



| Row  | Metabolite # | Abbreviation         | Metabolite Name                                                                   | Compartment |
|------|--------------|----------------------|-----------------------------------------------------------------------------------|-------------|
| 1704 | 151021       | Asn-X-Ser/Thr(l)     | protein-linked asparagine residue (N-glycosylation site)                          | Lysosome    |
| 1705 | 185231       | Rtotal(l)            | R total                                                                           | Lysosome    |
| 1706 | 203621       | Ser-Gly/Ala-X-Gly(l) | protein-linked serine residue (glycosaminoglycan attachment site)                 | Lysosome    |
| 1707 | 157871       | Ser/Thr(l)           | protein-linked serine or threonine residue (O-glycosylation site)                 | Lysosome    |
| 1708 | 157881       | Tn_antigen(l)        | Tn antigen                                                                        | Lysosome    |
| 1709 | 115371       | accoa(l)             | Acetyl-CoA                                                                        | Lysosome    |
| 1710 | 197391       | acgagbside_hs(l)     | alpha GalNAc globoside (homo sapiens)                                             | Lysosome    |
| 1711 | 8991         | acgal(l)             | N-Acetyl-D-galactosamine                                                          | Lysosome    |
| 1712 | 2241         | acgam(l)             | N-Acetyl-D-glucosamine                                                            | Lysosome    |
| 1713 | 197401       | acgbgbside_hs(l)     | beta GalNAc globoside (homo sapiens)                                              | Lysosome    |
| 1714 | 1341         | acnam(l)             | N-Acetylneuraminate                                                               | Lysosome    |
| 1715 | 2281         | ade(l)               | Adenine                                                                           | Lysosome    |
| 1716 | 2701         | adn(l)               | Adenosine                                                                         | Lysosome    |
| 1717 | 10931        | ala-D(l)             | D-Alanine                                                                         | Lysosome    |
| 1718 | 114121       | ala-L(l)             | L-Alanine                                                                         | Lysosome    |
| 1719 | 3091         | amp(l)               | AMP                                                                               | Lysosome    |
| 1720 | 90191        | cholp(l)             | Choline phosphate                                                                 | Lysosome    |
| 1721 | 2521         | chsterol(l)          | Cholesterol                                                                       | Lysosome    |
| 1722 | 113761       | cmp(l)               | CMP                                                                               | Lysosome    |
| 1723 | 4731         | coa(l)               | Coenzyme A                                                                        | Lysosome    |
| 1724 | 157981       | core6(l)             | Core 6                                                                            | Lysosome    |
| 1725 | 194781       | crm_hs(l)            | ceramide (homo sapiens)                                                           | Lysosome    |
| 1726 | 225081       | cs_a(l)              | chondroitin sulfate A (GalNAc4S-GlcA), free chain                                 | Lysosome    |
| 1727 | 225071       | cs_a_deg1(l)         | chondroitin sulfate A (GalNAc4S-GlcA), degradation product 1                      | Lysosome    |
| 1728 | 225131       | cs_a_deg2(l)         | chondroitin sulfate A (GalNAc4S-GlcA), degradation product 2                      | Lysosome    |
| 1729 | 225141       | cs_a_deg3(l)         | chondroitin sulfate A (GalNAc4S-GlcA), degradation product 3                      | Lysosome    |
| 1730 | 225151       | cs_a_deg4(l)         | chondroitin sulfate A (GalNAc4S-GlcA), degradation product 4                      | Lysosome    |
| 1731 | 225161       | cs_a_deg5(l)         | chondroitin sulfate A (GalNAc4S-GlcA), degradation product 5                      | Lysosome    |
| 1732 | 225111       | cs_b(l)              | chondroitin sulfate B / dermatan sulfate (IdoA2S-GalNAc4S), free chain            | Lysosome    |
| 1733 | 225171       | cs_b_deg1(l)         | chondroitin sulfate B / dermatan sulfate (IdoA2S-GalNAc4S), degradation product 1 | Lysosome    |
| 1734 | 225181       | cs_b_deg2(l)         | chondroitin sulfate B / dermatan sulfate (IdoA2S-GalNAc4S), degradation product 2 | Lysosome    |
| 1735 | 225191       | cs_b_deg3(l)         | chondroitin sulfate B / dermatan sulfate (IdoA2S-GalNAc4S), degradation product 3 | Lysosome    |
| 1736 | 225091       | cs_c(l)              | chondroitin sulfate C (GalNAc6S-GlcA), free chain                                 | Lysosome    |
| 1737 | 225201       | cs_c_deg1(l)         | chondroitin sulfate C (GalNAc6S-GlcA), degradation product 1                      | Lysosome    |
| 1738 | 225211       | cs_c_deg2(l)         | chondroitin sulfate C (GalNAc6S-GlcA), degradation product 2                      | Lysosome    |
| 1739 | 225221       | cs_c_deg3(l)         | chondroitin sulfate C (GalNAc6S-GlcA), degradation product 3                      | Lysosome    |

| Row  | Metabolite # | Abbreviation    | Metabolite Name                                                         | Compartment |
|------|--------------|-----------------|-------------------------------------------------------------------------|-------------|
| 1740 | 225231       | cs_c_deg4(l)    | chondroitin sulfate C (GalNAc6S-GlcA), degradation product 4            | Lysosome    |
| 1741 | 225241       | cs_c_deg5(l)    | chondroitin sulfate C (GalNAc6S-GlcA), degradation product 5            | Lysosome    |
| 1742 | 225101       | cs_d(l)         | chondroitin sulfate D (GlcNAc6S-GlcA2S), free chain                     | Lysosome    |
| 1743 | 225251       | cs_d_deg1(l)    | chondroitin sulfate D (GlcNAc6S-GlcA2S), degradation product 1          | Lysosome    |
| 1744 | 225261       | cs_d_deg2(l)    | chondroitin sulfate D (GlcNAc6S-GlcA2S), degradation product 2          | Lysosome    |
| 1745 | 225271       | cs_d_deg3(l)    | chondroitin sulfate D (GlcNAc6S-GlcA2S), degradation product 3          | Lysosome    |
| 1746 | 225281       | cs_d_deg4(l)    | chondroitin sulfate D (GlcNAc6S-GlcA2S), degradation product 4          | Lysosome    |
| 1747 | 225291       | cs_d_deg5(l)    | chondroitin sulfate D (GlcNAc6S-GlcA2S), degradation product 5          | Lysosome    |
| 1748 | 225301       | cs_d_deg6(l)    | chondroitin sulfate D (GlcNAc6S-GlcA2S), degradation product 6          | Lysosome    |
| 1749 | 225121       | cs_e(l)         | chondroitin sulfate E (GalNAc4,6diS-GlcA), free chain                   | Lysosome    |
| 1750 | 225321       | cs_e_deg1(l)    | chondroitin sulfate E (GalNAc4,6diS-GlcA), degradation product 1        | Lysosome    |
| 1751 | 225331       | cs_e_deg2(l)    | chondroitin sulfate E (GalNAc4,6diS-GlcA), degradation product 2        | Lysosome    |
| 1752 | 225341       | cs_e_deg3(l)    | chondroitin sulfate E (GalNAc4,6diS-GlcA), degradation product 3        | Lysosome    |
| 1753 | 225351       | cs_e_deg4(l)    | chondroitin sulfate E (GalNAc4,6diS-GlcA), degradation product 4        | Lysosome    |
| 1754 | 225361       | cs_e_deg5(l)    | chondroitin sulfate E (GalNAc4,6diS-GlcA), degradation product 5        | Lysosome    |
| 1755 | 225371       | cs_e_deg6(l)    | chondroitin sulfate E (GalNAc4,6diS-GlcA), degradation product 6        | Lysosome    |
| 1756 | 225381       | cs_e_deg7(l)    | chondroitin sulfate E (GalNAc4,6diS-GlcA), degradation product 7        | Lysosome    |
| 1757 | 205411       | cspg_a(l)       | chondroitin sulfate A (GalNAc4S-GlcA) proteoglycan                      | Lysosome    |
| 1758 | 205991       | cspg_b(l)       | chondroitin sulfate B / dermatan sulfate (IdoA2S-GalNAc4S) proteoglycan | Lysosome    |
| 1759 | 205451       | cspg_c(l)       | chondroitin sulfate C (GalNAc6S-GlcA) proteoglycan                      | Lysosome    |
| 1760 | 205541       | cspg_d(l)       | chondroitin sulfate D (GlcNAc6S-GlcA2S) proteoglycan                    | Lysosome    |
| 1761 | 205491       | cspg_e(l)       | chondroitin sulfate E (GalNAc4,6diS-GlcA) proteoglycan                  | Lysosome    |
| 1762 | 921          | cytd(l)         | Cytidine                                                                | Lysosome    |
| 1763 | 3801         | dad-2(l)        | Deoxyadenosine                                                          | Lysosome    |
| 1764 | 1931         | damp(l)         | dAMP                                                                    | Lysosome    |
| 1765 | 2901         | dcmp(l)         | dCMP                                                                    | Lysosome    |
| 1766 | 109181       | dcyt(l)         | Deoxycytidine                                                           | Lysosome    |
| 1767 | 1951         | dgmp(l)         | dGMP                                                                    | Lysosome    |
| 1768 | 1721         | dgsn(l)         | Deoxyguanosine                                                          | Lysosome    |
| 1769 | 105051       | dhf(l)          | 7,8-Dihydrofolate                                                       | Lysosome    |
| 1770 | 198101       | digalside_hs(l) | Digalactosylceramide                                                    | Lysosome    |

| Row  | Metabolite # | Abbreviation     | Metabolite Name                         | Compartment |
|------|--------------|------------------|-----------------------------------------|-------------|
| 1771 | 7371         | dpcoa(l)         | Dephospho-CoA                           | Lysosome    |
| 1772 | 1971         | dtmp(l)          | dTMP                                    | Lysosome    |
| 1773 | 158851       | f1a(l)           | F1alpha                                 | Lysosome    |
| 1774 | 3401         | fald(l)          | Formaldehyde                            | Lysosome    |
| 1775 | 8331         | fuc-L(l)         | L-Fucose                                | Lysosome    |
| 1776 | 10831        | gal(l)           | D-Galactose                             | Lysosome    |
| 1777 | 196191       | galgluside_hs(l) | galactosyl glucosyl ceramide            | Lysosome    |
| 1778 | 196141       | galside_hs(l)    | galactocerebroside (homo sapiens)       | Lysosome    |
| 1779 | 196241       | gbside_hs(l)     | globoside (homo sapiens)                | Lysosome    |
| 1780 | 3181         | glc-D(l)         | D-Glucose                               | Lysosome    |
| 1781 | 2561         | glcur(l)         | D-Glucuronate                           | Lysosome    |
| 1782 | 3131         | glu-L(l)         | L-Glutamate                             | Lysosome    |
| 1783 | 196131       | gluside_hs(l)    | glucocerebroside (homo sapiens)         | Lysosome    |
| 1784 | 3231         | gly(l)           | Glycine                                 | Lysosome    |
| 1785 | 2261         | gmp(l)           | GMP                                     | Lysosome    |
| 1786 | 52791        | gsn(l)           | Guanosine                               | Lysosome    |
| 1787 | 10491        | h(l)             | H+                                      | Lysosome    |
| 1788 | 3171         | h2o(l)           | H2O                                     | Lysosome    |
| 1789 | 3151         | h2o2(l)          | Hydrogen peroxide                       | Lysosome    |
| 1790 | 95541        | ha(l)            | hyaluronan                              | Lysosome    |
| 1791 | 226111       | ha_deg1(l)       | hyaluronan degradation product 1        | Lysosome    |
| 1792 | 226101       | ha_pre1(l)       | hyaluronan biosynthesis, precursor 1    | Lysosome    |
| 1793 | 207961       | hs(l)            | heparan sulfate, free chain             | Lysosome    |
| 1794 | 207551       | hs_deg1(l)       | heparan sulfate, degradation product 1  | Lysosome    |
| 1795 | 207641       | hs_deg10(l)      | heparan sulfate, degradation product 10 | Lysosome    |
| 1796 | 207651       | hs_deg11(l)      | heparan sulfate, degradation product 11 | Lysosome    |
| 1797 | 207661       | hs_deg12(l)      | heparan sulfate, degradation product 12 | Lysosome    |
| 1798 | 207671       | hs_deg13(l)      | heparan sulfate, degradation product 13 | Lysosome    |
| 1799 | 207681       | hs_deg14(l)      | heparan sulfate, degradation product 14 | Lysosome    |
| 1800 | 207691       | hs_deg15(l)      | heparan sulfate, degradation product 15 | Lysosome    |
| 1801 | 207701       | hs_deg16(l)      | heparan sulfate, degradation product 16 | Lysosome    |
| 1802 | 207711       | hs_deg17(l)      | heparan sulfate, degradation product 17 | Lysosome    |
| 1803 | 207721       | hs_deg18(l)      | heparan sulfate, degradation product 18 | Lysosome    |
| 1804 | 207731       | hs_deg19(l)      | heparan sulfate, degradation product 19 | Lysosome    |
| 1805 | 207561       | hs_deg2(l)       | heparan sulfate, degradation product 2  | Lysosome    |
| 1806 | 207741       | hs_deg20(l)      | heparan sulfate, degradation product 20 | Lysosome    |
| 1807 | 207751       | hs_deg21(l)      | heparan sulfate, degradation product 21 | Lysosome    |
| 1808 | 207761       | hs_deg22(l)      | heparan sulfate, degradation product 22 | Lysosome    |
| 1809 | 207771       | hs_deg23(l)      | heparan sulfate, degradation product 23 | Lysosome    |
| 1810 | 207951       | hs_deg24(l)      | heparan sulfate, degradation product 24 | Lysosome    |
| 1811 | 207941       | hs_deg25(l)      | heparan sulfate, degradation product 25 | Lysosome    |
| 1812 | 207571       | hs_deg3(l)       | heparan sulfate, degradation product 3  | Lysosome    |
| 1813 | 207581       | hs_deg4(l)       | heparan sulfate, degradation product 4  | Lysosome    |
| 1814 | 207591       | hs_deg5(l)       | heparan sulfate, degradation product 5  | Lysosome    |
| 1815 | 207601       | hs_deg6(l)       | heparan sulfate, degradation product 6  | Lysosome    |
| 1816 | 207611       | hs_deg7(l)       | heparan sulfate, degradation product 7  | Lysosome    |
| 1817 | 207621       | hs_deg8(l)       | heparan sulfate, degradation product 8  | Lysosome    |
| 1818 | 207631       | hs_deg9(l)       | heparan sulfate, degradation product 9  | Lysosome    |
| 1819 | 206381       | hspg(l)          | heparan sulfate proteoglycan            | Lysosome    |
| 1820 | 2181         | hxan(l)          | Hypoxanthine                            | Lysosome    |
| 1821 | 53921        | idour(l)         | L-Iduronate                             | Lysosome    |
| 1822 | 1471         | ins(l)           | Inosine                                 | Lysosome    |
| 1823 | 201921       | ksi(l)           | keratan sulfate I                       | Lysosome    |

| Row  | Metabolite # | Abbreviation       | Metabolite Name                                           | Compartment |
|------|--------------|--------------------|-----------------------------------------------------------|-------------|
| 1824 | 225531       | ksi_deg1(l)        | keratan sulfate I, degradation product 1                  | Lysosome    |
| 1825 | 225621       | ksi_deg10(l)       | keratan sulfate I, degradation product 10                 | Lysosome    |
| 1826 | 225631       | ksi_deg11(l)       | keratan sulfate I, degradation product 11                 | Lysosome    |
| 1827 | 225641       | ksi_deg12(l)       | keratan sulfate I, degradation product 12                 | Lysosome    |
| 1828 | 225651       | ksi_deg13(l)       | keratan sulfate I, degradation product 13                 | Lysosome    |
| 1829 | 225661       | ksi_deg14(l)       | keratan sulfate I, degradation product 14                 | Lysosome    |
| 1830 | 225671       | ksi_deg15(l)       | keratan sulfate I, degradation product 15                 | Lysosome    |
| 1831 | 225751       | ksi_deg16(l)       | keratan sulfate I, degradation product 16                 | Lysosome    |
| 1832 | 225831       | ksi_deg17(l)       | keratan sulfate I, degradation product 17                 | Lysosome    |
| 1833 | 225681       | ksi_deg18(l)       | keratan sulfate I, degradation product 18                 | Lysosome    |
| 1834 | 225761       | ksi_deg19(l)       | keratan sulfate I, degradation product 19                 | Lysosome    |
| 1835 | 225541       | ksi_deg2(l)        | keratan sulfate I, degradation product 2                  | Lysosome    |
| 1836 | 225841       | ksi_deg20(l)       | keratan sulfate I, degradation product 20                 | Lysosome    |
| 1837 | 225691       | ksi_deg21(l)       | keratan sulfate I, degradation product 21                 | Lysosome    |
| 1838 | 225771       | ksi_deg22(l)       | keratan sulfate I, degradation product 22                 | Lysosome    |
| 1839 | 225851       | ksi_deg23(l)       | keratan sulfate I, degradation product 23                 | Lysosome    |
| 1840 | 225701       | ksi_deg24(l)       | keratan sulfate I, degradation product 24                 | Lysosome    |
| 1841 | 225781       | ksi_deg25(l)       | keratan sulfate I, degradation product 25                 | Lysosome    |
| 1842 | 225861       | ksi_deg26(l)       | keratan sulfate I, degradation product 26                 | Lysosome    |
| 1843 | 225711       | ksi_deg27(l)       | keratan sulfate I, degradation product 27                 | Lysosome    |
| 1844 | 225791       | ksi_deg28(l)       | keratan sulfate I, degradation product 28                 | Lysosome    |
| 1845 | 225871       | ksi_deg29(l)       | keratan sulfate I, degradation product 29                 | Lysosome    |
| 1846 | 225551       | ksi_deg3(l)        | keratan sulfate I, degradation product 3                  | Lysosome    |
| 1847 | 225721       | ksi_deg30(l)       | keratan sulfate I, degradation product 30                 | Lysosome    |
| 1848 | 225801       | ksi_deg31(l)       | keratan sulfate I, degradation product 31                 | Lysosome    |
| 1849 | 225881       | ksi_deg32(l)       | keratan sulfate I, degradation product 32                 | Lysosome    |
| 1850 | 225731       | ksi_deg33(l)       | keratan sulfate I, degradation product 33                 | Lysosome    |
| 1851 | 225811       | ksi_deg34(l)       | keratan sulfate I, degradation product 34                 | Lysosome    |
| 1852 | 225891       | ksi_deg35(l)       | keratan sulfate I, degradation product 35                 | Lysosome    |
| 1853 | 225741       | ksi_deg36(l)       | keratan sulfate I, degradation product 36                 | Lysosome    |
| 1854 | 225821       | ksi_deg37(l)       | keratan sulfate I, degradation product 37                 | Lysosome    |
| 1855 | 225901       | ksi_deg38(l)       | keratan sulfate I, degradation product 38                 | Lysosome    |
| 1856 | 225911       | ksi_deg39(l)       | keratan sulfate I, degradation product 39                 | Lysosome    |
| 1857 | 225561       | ksi_deg4(l)        | keratan sulfate I, degradation product 4                  | Lysosome    |
| 1858 | 225921       | ksi_deg40(l)       | keratan sulfate I, degradation product 40                 | Lysosome    |
| 1859 | 225931       | ksi_deg41(l)       | keratan sulfate I, degradation product 41                 | Lysosome    |
| 1860 | 225571       | ksi_deg5(l)        | keratan sulfate I, degradation product 5                  | Lysosome    |
| 1861 | 225581       | ksi_deg6(l)        | keratan sulfate I, degradation product 6                  | Lysosome    |
| 1862 | 225591       | ksi_deg7(l)        | keratan sulfate I, degradation product 7                  | Lysosome    |
| 1863 | 225601       | ksi_deg8(l)        | keratan sulfate I, degradation product 8                  | Lysosome    |
| 1864 | 225611       | ksi_deg9(l)        | keratan sulfate I, degradation product 9                  | Lysosome    |
| 1865 | 201561       | ksii_core2(l)      | keratan sulfate II (core 2-linked)                        | Lysosome    |
| 1866 | 225941       | ksii_core2_deg1(l) | keratan sulfate II (core 2-linked), degradation product 1 | Lysosome    |
| 1867 | 225951       | ksii_core2_deg2(l) | keratan sulfate II (core 2-linked), degradation product 2 | Lysosome    |
| 1868 | 225961       | ksii_core2_deg3(l) | keratan sulfate II (core 2-linked), degradation product 3 | Lysosome    |
| 1869 | 225971       | ksii_core2_deg4(l) | keratan sulfate II (core 2-linked), degradation product 4 | Lysosome    |
| 1870 | 225981       | ksii_core2_deg5(l) | keratan sulfate II (core 2-linked), degradation product 5 | Lysosome    |

| Row  | Metabolite # | Abbreviation       | Metabolite Name                                                                                                                                                                                     | Compartment |
|------|--------------|--------------------|-----------------------------------------------------------------------------------------------------------------------------------------------------------------------------------------------------|-------------|
| 1871 | 225991       | ksii_core2_deg6(l) | keratan sulfate II (core 2-linked), degradation product 6                                                                                                                                           | Lysosome    |
| 1872 | 226001       | ksii_core2_deg7(l) | keratan sulfate II (core 2-linked), degradation product 7                                                                                                                                           | Lysosome    |
| 1873 | 226011       | ksii_core2_deg8(l) | keratan sulfate II (core 2-linked), degradation product 8                                                                                                                                           | Lysosome    |
| 1874 | 226021       | ksii_core2_deg9(l) | keratan sulfate II (core 2-linked), degradation product 9                                                                                                                                           | Lysosome    |
| 1875 | 203421       | ksii_core4(l)      | keratan sulfate II (core 4-linked)                                                                                                                                                                  | Lysosome    |
| 1876 | 226051       | ksii_core4_deg1(l) | keratan sulfate II (core 4-linked), degradation product 1                                                                                                                                           | Lysosome    |
| 1877 | 226061       | ksii_core4_deg2(l) | keratan sulfate II (core 4-linked), degradation product 2                                                                                                                                           | Lysosome    |
| 1878 | 226071       | ksii_core4_deg3(l) | keratan sulfate II (core 4-linked), degradation product 3                                                                                                                                           | Lysosome    |
| 1879 | 226081       | ksii_core4_deg4(l) | keratan sulfate II (core 4-linked), degradation product 4                                                                                                                                           | Lysosome    |
| 1880 | 156701       | l2n2m2mn(l)        | de-Fuc, reducing GlcNAc removed, de-Sia form of PA6 (w/o peptide linkage)                                                                                                                           | Lysosome    |
| 1881 | 2921         | lcts(l)            | Lactose                                                                                                                                                                                             | Lysosome    |
| 1882 | 156721       | m2mn(l)            | (alpha-D-mannosyl)2-beta-D-mannosyl-N-acetylglucosamine                                                                                                                                             | Lysosome    |
| 1883 | 2671         | malt(l)            | Maltose                                                                                                                                                                                             | Lysosome    |
| 1884 | 12841        | malttr(l)          | Maltotriose                                                                                                                                                                                         | Lysosome    |
| 1885 | 110181       | man(l)             | D-Mannose                                                                                                                                                                                           | Lysosome    |
| 1886 | 10921        | meoh(l)            | Methanol                                                                                                                                                                                            | Lysosome    |
| 1887 | 156731       | mn(l)              | beta-1,4-mannose-N-acetylglucosamine                                                                                                                                                                | Lysosome    |
| 1888 | 156711       | n2m2mn(l)          | de-Fuc, reducing GlcNAc removed, de-Sia, de-Gal form of PA6 (w/o peptide linkage)                                                                                                                   | Lysosome    |
| 1889 | 156811       | n2m2nm(l)          | n2m2nmasn (w/o peptide linkage)                                                                                                                                                                     | Lysosome    |
| 1890 | 36491        | n2m2nmasn(l)       | N-Acetyl-beta-D-glucosaminyl-1,2-alpha-D-mannosyl-1,3-(N-acetyl-beta-D-glucosaminyl-1,2-alpha-D-mannosyl-1,6)-(N-acetyl-beta-D-glucosaminyl-1,4)-beta-D-mannosyl-1,4-N-acetyl-beta-D-glucosaminyl-R | Lysosome    |
| 1891 | 156821       | n2m2nmn(l)         | reducing GlcNAc removed form of n2m2nmasn (w/o peptide)                                                                                                                                             | Lysosome    |
| 1892 | 4721         | pi(l)              | Phosphate                                                                                                                                                                                           | Lysosome    |
| 1893 | 6291         | pro-D(l)           | D-Proline                                                                                                                                                                                           | Lysosome    |
| 1894 | 2291         | pro-L(l)           | L-Proline                                                                                                                                                                                           | Lysosome    |
| 1895 | 152071       | s2l2fn2m2masn(l)   | PA6                                                                                                                                                                                                 | Lysosome    |
| 1896 | 156671       | s2l2n2m2m(l)       | de-Fuc form of PA6 (w/o peptide linkage)                                                                                                                                                            | Lysosome    |
| 1897 | 156651       | s2l2n2m2masn(l)    | de-Fuc form of PA6                                                                                                                                                                                  | Lysosome    |
| 1898 | 156691       | s2l2n2m2mn(l)      | de-Fuc, reducing GlcNAc removed form of PA6 (w/o peptide linkage)                                                                                                                                   | Lysosome    |
| 1899 | 196151       | sgalside_hs(l)     | sulfatide galactocerebroside (homo sapiens)                                                                                                                                                         | Lysosome    |
| 1900 | 3351         | so4(l)             | Sulfate                                                                                                                                                                                             | Lysosome    |
| 1901 | 107031       | sphings(l)         | Sphingosine                                                                                                                                                                                         | Lysosome    |
| 1902 | 196181       | sphmyln_hs(l)      | sphingomyelin (homo sapiens)                                                                                                                                                                        | Lysosome    |
| 1903 | 10651        | thf(l)             | 5,6,7,8-Tetrahydrofolate                                                                                                                                                                            | Lysosome    |
| 1904 | 52691        | thymd(l)           | Thymidine                                                                                                                                                                                           | Lysosome    |
| 1905 | 4771         | udp(l)             | UDP                                                                                                                                                                                                 | Lysosome    |
| 1906 | 109121       | udpacgal(l)        | UDP-N-acetyl-D-galactosamine                                                                                                                                                                        | Lysosome    |

| Row  | Metabolite # | Abbreviation     | Metabolite Name                                            | Compartment  |
|------|--------------|------------------|------------------------------------------------------------|--------------|
| 1907 | 1068l        | ump(l)           | UMP                                                        | Lysosome     |
| 1908 | 10727l       | uri(l)           | Uridine                                                    | Lysosome     |
| 1909 | 248l         | xyl-D(l)         | D-Xylose                                                   | Lysosome     |
| 1910 | 286m         | 10fthf(m)        | 10-Formyltetrahydrofolate                                  | Mitochondria |
| 1911 | 20786m       | 10fthf5glu(m)    | 10-formyltetrahydrofolate-[Glu](5)                         | Mitochondria |
| 1912 | 20787m       | 10fthf6glu(m)    | 10-formyltetrahydrofolate-[Glu](6)                         | Mitochondria |
| 1913 | 20788m       | 10fthf7glu(m)    | 10-formyltetrahydrofolate-[Glu](7)                         | Mitochondria |
| 1914 | 3407m        | 11doctrsl(m)     | 11-Deoxycortisol                                           | Mitochondria |
| 1915 | 2404m        | 11doctrstrn(m)   | 11-Deoxycorticosterone                                     | Mitochondria |
| 1916 | 20075m       | 1a2425thvitd2(m) | 1-alpha,24R,25-Trihydroxyvitamin D2                        | Mitochondria |
| 1917 | 20076m       | 1a2425thvitd3(m) | 1-alpha,24R,25-Trihydroxyvitamin D3                        | Mitochondria |
| 1918 | 20018m       | 1a25dhvitd2(m)   | 1-alpha,25-Dihydroxyvitamin D2                             | Mitochondria |
| 1919 | 20017m       | 1a25dhvitd3(m)   | 1-alpha,25-Dihydroxyvitamin D3                             | Mitochondria |
| 1920 | 3261m        | 1p3h5c(m)        | L-1-Pyrroline-3-hydroxy-5-carboxylate                      | Mitochondria |
| 1921 | 2994m        | 1pyr5c(m)        | 1-Pyrroline-5-carboxylate                                  | Mitochondria |
| 1922 | 7532m        | 20ahchsterol(m)  | 20alpha-hydroxy cholesterol                                | Mitochondria |
| 1923 | 20023m       | 2425dhvitd2(m)   | 24R,25-Dihydroxyvitamin D2                                 | Mitochondria |
| 1924 | 20024m       | 2425dhvitd3(m)   | 24R,25-Dihydroxyvitamin D3                                 | Mitochondria |
| 1925 | 20014m       | 25hvitd2(m)      | 25-Hydroxyvitamin D2                                       | Mitochondria |
| 1926 | 20012m       | 25hvitd3(m)      | 25-Hydroxyvitamin D3                                       | Mitochondria |
| 1927 | 2707m        | 2aobut(m)        | L-2-Amino-3-oxobutanoate                                   | Mitochondria |
| 1928 | 19793m       | 2dp6mep(m)       | 2-Decaprenyl-6-methoxyphenol                               | Mitochondria |
| 1929 | 19804m       | 2dp6mobq(m)      | 2-Decaprenyl-6-methoxy-1,4-benzoquinone                    | Mitochondria |
| 1930 | 19805m       | 2dp6mobq_me(m)   | 2-Decaprenyl-3-methyl-6-methoxy-1,4-benzoquinone           | Mitochondria |
| 1931 | 19808m       | 2dpmhobq(m)      | 2-Decaprenyl-3-methyl-5-hydroxy-6-methoxy-1,4-benzoquinone | Mitochondria |
| 1932 | 2497m        | 2maacoa(m)       | 2-Methyl-3-acetoacetyl-CoA                                 | Mitochondria |
| 1933 | 2498m        | 2mb2coa(m)       | trans-2-Methylbut-2-enoyl-CoA                              | Mitochondria |
| 1934 | 844m         | 2mbcoa(m)        | 2-Methylbutanoyl-CoA                                       | Mitochondria |
| 1935 | 186m         | 2mop(m)          | 2-Methyl-3-oxopropanoate                                   | Mitochondria |
| 1936 | 2388m        | 2mp2coa(m)       | 2-Methylprop-2-enoyl-CoA                                   | Mitochondria |
| 1937 | 9002m        | 2oxoadp(m)       | 2-Oxoadipate                                               | Mitochondria |
| 1938 | 22485m       | 34hpl(m)         | 3-(4-Hydroxyphenyl)lactate                                 | Mitochondria |
| 1939 | 772m         | 34hpp(m)         | 3-(4-Hydroxyphenyl)pyruvate                                | Mitochondria |
| 1940 | 2457m        | 3aib(m)          | L-3-Amino-isobutanoate                                     | Mitochondria |
| 1941 | 2444m        | 3aib-D(m)        | D-3-Amino-isobutanoate                                     | Mitochondria |
| 1942 | 19791m       | 3dpdhh(m)        | 3-Decaprenyl-4,5-dihydroxybenzoate                         | Mitochondria |
| 1943 | 19792m       | 3dpdhh_me(m)     | 3-Decaprenyl-4-hydroxy-5-methoxybenzoate                   | Mitochondria |
| 1944 | 19772m       | 3dphb(m)         | 3-Decaprenyl-4-hydroxybenzoate                             | Mitochondria |
| 1945 | 19703m       | 3h26dm5coa(m)    | 3-Hydroxy-2,6-dimethyl-5-methylene-heptanoyl-CoA           | Mitochondria |
| 1946 | 905m         | 3hbcoa(m)        | (S)-3-Hydroxybutanoyl-CoA                                  | Mitochondria |
| 1947 | 2736m        | 3hbcoa-R(m)      | (R)-3-Hydroxybutanoyl-CoA                                  | Mitochondria |
| 1948 | 4444m        | 3hibutcoa(m)     | (S)-3-Hydroxyisobutyryl-CoA                                | Mitochondria |
| 1949 | 3162m        | 3hmbcoa(m)       | (S)-3-Hydroxy-2-methylbutyryl-CoA                          | Mitochondria |
| 1950 | 779m         | 3hmp(m)          | 3-Hydroxy-2-methylpropanoate                               | Mitochondria |
| 1951 | 4184m        | 3hpcoa(m)        | 3-Hydroxypropionyl-CoA                                     | Mitochondria |
| 1952 | 7135m        | 3htmelys(m)      | 3-Hydroxy-N6,N6,N6-trimethyl-L-lysine                      | Mitochondria |
| 1953 | 2308m        | 3mb2coa(m)       | 3-Methylbut-2-enoyl-CoA                                    | Mitochondria |
| 1954 | 2423m        | 3mgcoa(m)        | 3-Methylglutaconyl-CoA                                     | Mitochondria |
| 1955 | 225m         | 3mob(m)          | 3-Methyl-2-oxobutanoate                                    | Mitochondria |
| 1956 | 445m         | 3mop(m)          | (S)-3-Methyl-2-oxopentanoate                               | Mitochondria |

| Row  | Metabolite # | Abbreviation  | Metabolite Name                     | Compartment  |
|------|--------------|---------------|-------------------------------------|--------------|
| 1957 | 1105m        | 3sala(m)      | 3-Sulfino-L-alanine                 | Mitochondria |
| 1958 | 3427m        | 3snpyr(m)     | 3-Sulfino-pyruvate                  | Mitochondria |
| 1959 | 15766m       | 3spyr(m)      | 3-Sulfopyruvate                     | Mitochondria |
| 1960 | 7924m        | 4aabutn(m)    | 4-Acetamidobutanoate                | Mitochondria |
| 1961 | 176m         | 4abut(m)      | 4-Aminobutanoate                    | Mitochondria |
| 1962 | 896m         | 4h2oglt(m)    | 4-Hydroxy-2-oxoglutarate            | Mitochondria |
| 1963 | 234m         | 4hbz(m)       | 4-Hydroxybenzoate                   | Mitochondria |
| 1964 | 22487m       | 4hbzcoa(m)    | 4-hydroxybenoyl-CoA                 | Mitochondria |
| 1965 | 8300m        | 4hglusa(m)    | L-4-Hydroxyglutamate semialdehyde   | Mitochondria |
| 1966 | 913m         | 4hpro-LT(m)   | trans-4-Hydroxy-L-proline           | Mitochondria |
| 1967 | 285m         | 4mop(m)       | 4-Methyl-2-oxopentanoate            | Mitochondria |
| 1968 | 1711m        | 4mptnl(m)     | 4-Methylpentanal                    | Mitochondria |
| 1969 | 2022m        | 4ppan(m)      | D-4'-Phosphopantothenate            | Mitochondria |
| 1970 | 908m         | 4tmeabut(m)   | 4-Trimethylammonio-butanal          | Mitochondria |
| 1971 | 424m         | 5aop(m)       | 5-Amino-4-oxopentanoate             | Mitochondria |
| 1972 | 20783m       | 5dhf(m)       | pentaglutamyl folate (DHF)          | Mitochondria |
| 1973 | 4155m        | 5hoxindact(m) | 5-Hydroxyindoleacetaldehyde         | Mitochondria |
| 1974 | 11161m       | 5hoxindoa(m)  | 5-Hydroxyindoleacetate              | Mitochondria |
| 1975 | 20780m       | 5thf(m)       | pentaglutamyl folate (THF)          | Mitochondria |
| 1976 | 20784m       | 6dhf(m)       | hexaglutamyl folate (DHF)           | Mitochondria |
| 1977 | 20781m       | 6thf(m)       | hexaglutamyl folate (THF)           | Mitochondria |
| 1978 | 20785m       | 7dhf(m)       | heptaglutamyl folate (DHF)          | Mitochondria |
| 1979 | 20782m       | 7thf(m)       | heptaglutamyl folate (THF)          | Mitochondria |
| 1980 | 69m          | ACP(m)        | acyl carrier protein                | Mitochondria |
| 1981 | 9011m        | L2aadp(m)     | L-2-Amino adipate                   | Mitochondria |
| 1982 | 7588m        | L2aadp6sa(m)  | L-2-Amino adipate 6-semialdehyde    | Mitochondria |
| 1983 | 120m         | Lcyst(m)      | L-Cysteate                          | Mitochondria |
| 1984 | 679m         | Nacasp(m)     | N-Acetyl-L-aspartate                | Mitochondria |
| 1985 | 22166m       | Rtotal2coa(m) | R total 2 coenzyme A                | Mitochondria |
| 1986 | 22470m       | Rtotal2crn(m) | R total 2 carnitine                 | Mitochondria |
| 1987 | 22167m       | Rtotal3coa(m) | R total 3 Coenzyme A                | Mitochondria |
| 1988 | 22471m       | Rtotal3crn(m) | R total 3 carnitine                 | Mitochondria |
| 1989 | 22165m       | Rtotalcoa(m)  | R total Coenzyme A                  | Mitochondria |
| 1990 | 22469m       | Rtotalcrn(m)  | R total carnitine                   | Mitochondria |
| 1991 | 656m         | T4hcinnm(m)   | trans-4-Hydroxycinnamate            | Mitochondria |
| 1992 | 174m         | aacoa(m)      | Acetoacetyl-CoA                     | Mitochondria |
| 1993 | 1533m        | aact(m)       | Aminoacetone                        | Mitochondria |
| 1994 | 319m         | ac(m)         | Acetate                             | Mitochondria |
| 1995 | 9016m        | acac(m)       | Acetoacetate                        | Mitochondria |
| 1996 | 1052m        | acald(m)      | Acetaldehyde                        | Mitochondria |
| 1997 | 11537m       | accoa(m)      | Acetyl-CoA                          | Mitochondria |
| 1998 | 266m         | acetone(m)    | Acetone                             | Mitochondria |
| 1999 | 2957m        | acg5p(m)      | N-Acetyl-L-glutamyl 5-phosphate     | Mitochondria |
| 2000 | 975m         | acg5sa(m)     | N-Acetyl-L-glutamate 5-semialdehyde | Mitochondria |
| 2001 | 1115m        | acglu(m)      | N-Acetyl-L-glutamate                | Mitochondria |
| 2002 | 7471m        | acrn(m)       | O-Acetylcarnitine                   | Mitochondria |
| 2003 | 270m         | adn(m)        | Adenosine                           | Mitochondria |
| 2004 | 10925m       | adocbl(m)     | Adenosylcobalamin                   | Mitochondria |
| 2005 | 471m         | adp(m)        | ADP                                 | Mitochondria |
| 2006 | 151m         | adprib(m)     | ADPribose                           | Mitochondria |
| 2007 | 18484m       | adrncoa(m)    | adrenyl coenzyme A                  | Mitochondria |
| 2008 | 25984m       | adrncrn(m)    | Adrenyl carnitine                   | Mitochondria |
| 2009 | 247m         | agm(m)        | Agmatine                            | Mitochondria |

| Row  | Metabolite # | Abbreviation    | Metabolite Name                                                | Compartment  |
|------|--------------|-----------------|----------------------------------------------------------------|--------------|
| 2010 | 310m         | ahcys(m)        | S-Adenosyl-L-homocysteine                                      | Mitochondria |
| 2011 | 314m         | akg(m)          | 2-Oxoglutarate                                                 | Mitochondria |
| 2012 | 1063m        | ala-B(m)        | beta-Alanine                                                   | Mitochondria |
| 2013 | 11412m       | ala-L(m)        | L-Alanine                                                      | Mitochondria |
| 2014 | 1447m        | aldstrn(m)      | Aldosterone                                                    | Mitochondria |
| 2015 | 18535m       | alpa_hs(m)      | lysophosphatidic acid (homo sapiens)                           | Mitochondria |
| 2016 | 7690m        | alpam(m)        | S-aminomethylidihydroipoamide                                  | Mitochondria |
| 2017 | 10354m       | alpro(m)        | S-Aminomethylidihydroipoylprotein                              | Mitochondria |
| 2018 | 1086m        | amet(m)         | S-Adenosyl-L-methionine                                        | Mitochondria |
| 2019 | 309m         | amp(m)          | AMP                                                            | Mitochondria |
| 2020 | 22737m       | apoC(m)         | Apocboxylase (no lys residue)                                  | Mitochondria |
| 2021 | 22735m       | apoC-Lys(m)     | Apocboxylase (Lys residue)                                     | Mitochondria |
| 2022 | 22736m       | apoC-Lys_btn(m) | Holocarboxylase (biotin covalent bound to Lys residue of apoC) | Mitochondria |
| 2023 | 18483m       | arachcoa(m)     | arachidyl coenzyme A                                           | Mitochondria |
| 2024 | 25967m       | arachcrn(m)     | arachidyl carnitine                                            | Mitochondria |
| 2025 | 11887m       | arachdcoa(m)    | C20:4-CoA                                                      | Mitochondria |
| 2026 | 11889m       | arachdcrn(m)    | C20:4 carnitine                                                | Mitochondria |
| 2027 | 337m         | arg-L(m)        | L-Arginine                                                     | Mitochondria |
| 2028 | 232m         | asn-L(m)        | L-Asparagine                                                   | Mitochondria |
| 2029 | 330m         | asp-L(m)        | L-Aspartate                                                    | Mitochondria |
| 2030 | 465m         | atp(m)          | ATP                                                            | Mitochondria |
| 2031 | 733m         | b2coa(m)        | Crotonoyl-CoA                                                  | Mitochondria |
| 2032 | 4182m        | bamppald(m)     | beta-Aminopropion aldehyde                                     | Mitochondria |
| 2033 | 392m         | betald(m)       | Betaine aldehyde                                               | Mitochondria |
| 2034 | 870m         | bhb(m)          | (R)-3-Hydroxybutanoate                                         | Mitochondria |
| 2035 | 4297m        | biocyt(m)       | Biocytin                                                       | Mitochondria |
| 2036 | 4584m        | btamp(m)        | Biotinyl-5'-AMP                                                | Mitochondria |
| 2037 | 222m         | btcoa(m)        | Butanoyl-CoA                                                   | Mitochondria |
| 2038 | 1079m        | btn(m)          | Biotin                                                         | Mitochondria |
| 2039 | 294m         | but(m)          | Butyrate (n-C4:0)                                              | Mitochondria |
| 2040 | 11888m       | c226coa(m)      | cervonyl coenzyme A                                            | Mitochondria |
| 2041 | 11883m       | c226crn(m)      | cervonyl carnitine                                             | Mitochondria |
| 2042 | 19701m       | c2m26dcoa(m)    | cis-2-Methyl-5-isopropylhexa-2,5-dienoyl-CoA                   | Mitochondria |
| 2043 | 10988m       | cbl1(m)         | Cob(I)alamin                                                   | Mitochondria |
| 2044 | 365m         | cbl2(m)         | Cob(II)alamin                                                  | Mitochondria |
| 2045 | 11004m       | cbp(m)          | Carbamoyl phosphate                                            | Mitochondria |
| 2046 | 20077m       | cca_d3(m)       | Calcitroic acid (D3)                                           | Mitochondria |
| 2047 | 1073m        | cdp(m)          | CDP                                                            | Mitochondria |
| 2048 | 19105m       | cdpdag_hs(m)    | CDP diacylglycerol (homo sapiens)                              | Mitochondria |
| 2049 | 1075m        | chol(m)         | Choline                                                        | Mitochondria |
| 2050 | 252m         | chsterol(m)     | Cholesterol                                                    | Mitochondria |
| 2051 | 236m         | cit(m)          | Citrate                                                        | Mitochondria |
| 2052 | 828m         | citmcoa-L(m)    | L-Citramalyl-CoA                                               | Mitochondria |
| 2053 | 169m         | citr-L(m)       | L-Citrulline                                                   | Mitochondria |
| 2054 | 18488m       | clpndcoa(m)     | clupanodonyl CoA                                               | Mitochondria |
| 2055 | 25990m       | clpndcrn(m)     | clupanodonyl carnitine                                         | Mitochondria |
| 2056 | 11376m       | cmp(m)          | CMP                                                            | Mitochondria |
| 2057 | 474m         | co2(m)          | CO2                                                            | Mitochondria |
| 2058 | 473m         | coa(m)          | Coenzyme A                                                     | Mitochondria |
| 2059 | 22486m       | coucoa(m)       | p-coumaroyl-CoA                                                | Mitochondria |
| 2060 | 150m         | creat(m)        | Creatine                                                       | Mitochondria |
| 2061 | 163m         | crn(m)          | L-Carnitine                                                    | Mitochondria |



| Row  | Metabolite # | Abbreviation      | Metabolite Name                            | Compartment  |
|------|--------------|-------------------|--------------------------------------------|--------------|
| 2062 | 11268m       | crtsl(m)          | Cortisol                                   | Mitochondria |
| 2063 | 1737m        | crtstrn(m)        | Corticosterone                             | Mitochondria |
| 2064 | 338m         | ctp(m)            | CTP                                        | Mitochondria |
| 2065 | 245m         | cyan(m)           | Hydrogen cyanide                           | Mitochondria |
| 2066 | 1062m        | cys-L(m)          | L-Cysteine                                 | Mitochondria |
| 2067 | 92m          | cytd(m)           | Cytidine                                   | Mitochondria |
| 2068 | 265m         | dadp(m)           | dADP                                       | Mitochondria |
| 2069 | 1091m        | datp(m)           | dATP                                       | Mitochondria |
| 2070 | 5272m        | dcdp(m)           | dCDP                                       | Mitochondria |
| 2071 | 290m         | dcmp(m)           | dCMP                                       | Mitochondria |
| 2072 | 18487m       | dcsptnlcoa(m)     | docosa-4,7,10,13,16-pentaenoyl coenzyme A  | Mitochondria |
| 2073 | 25989m       | dcsptnlcrn(m)     | docosa-4,7,10,13,16-pentaenoyl carnitine   | Mitochondria |
| 2074 | 78m          | dctp(m)           | dCTP                                       | Mitochondria |
| 2075 | 10918m       | dcyt(m)           | Deoxycytidine                              | Mitochondria |
| 2076 | 2416m        | dd2coa(m)         | trans-Dodec-2-enoyl-CoA                    | Mitochondria |
| 2077 | 12055m       | dd3coa(m)         | 3-dodecenoyl CoA                           | Mitochondria |
| 2078 | 12883m       | decdp(m)          | all trans Decaprenyl diphosphate           | Mitochondria |
| 2079 | 194m         | dgdpm(m)          | dGDP                                       | Mitochondria |
| 2080 | 195m         | dgm(m)            | dGMP                                       | Mitochondria |
| 2081 | 172m         | dgsn(m)           | Deoxyguanosine                             | Mitochondria |
| 2082 | 143m         | dgt(m)            | dGTP                                       | Mitochondria |
| 2083 | 3997m        | dhcholestanate(m) | 3alpha,7alpha-Dihydroxy-5beta-cholestanate | Mitochondria |
| 2084 | 10505m       | dhf(m)            | 7,8-Dihydrofolate                          | Mitochondria |
| 2085 | 394m         | dhlam(m)          | Dihydrolipoamide                           | Mitochondria |
| 2086 | 56m          | dhlpro(m)         | Dihydrolipolprotein                        | Mitochondria |
| 2087 | 1032m        | didp(m)           | dIDP                                       | Mitochondria |
| 2088 | 1033m        | ditp(m)           | dITP                                       | Mitochondria |
| 2089 | 18491m       | dlnlcgcoa(m)      | dihomo-gamma-linolenyl coenzyme A          | Mitochondria |
| 2090 | 25979m       | dlnlcgcrn(m)      | dihomo-gamma-linolenyl carnitine           | Mitochondria |
| 2091 | 840m         | dmgly(m)          | N,N-Dimethylglycine                        | Mitochondria |
| 2092 | 21977m       | dnhptcoa(m)       | 2,6 dimethylheptanoyl-CoA                  | Mitochondria |
| 2093 | 26488m       | dnhptcrn(m)       | 2,6 dimethylheptanoyl carnitine            | Mitochondria |
| 2094 | 21959m       | dmnoncoa(m)       | 4,8 dimethylnonanoyl-CoA                   | Mitochondria |
| 2095 | 21976m       | dmnoncrn(m)       | 4,8 dimethylnonanoyl carnitine             | Mitochondria |
| 2096 | 724m         | dnad(m)           | Deamino-NAD+                               | Mitochondria |
| 2097 | 196m         | dtdp(m)           | dTDP                                       | Mitochondria |
| 2098 | 197m         | dtmp(m)           | dTMP                                       | Mitochondria |
| 2099 | 79m          | dttp(m)           | dTTP                                       | Mitochondria |
| 2100 | 1034m        | dudp(m)           | dUDP                                       | Mitochondria |
| 2101 | 198m         | dump(m)           | dUMP                                       | Mitochondria |
| 2102 | 355m         | duri(m)           | Deoxyuridine                               | Mitochondria |
| 2103 | 80m          | dutp(m)           | dUTP                                       | Mitochondria |
| 2104 | 8301m        | e4hglu(m)         | L-erythro-4-Hydroxyglutamate               | Mitochondria |
| 2105 | 18507m       | eicosetcoa(m)     | eicosatetranoyl coenzyme A                 | Mitochondria |
| 2106 | 25980m       | eicosetcrn(m)     | Eicosatetranoyl carnitine                  | Mitochondria |
| 2107 | 25972m       | elaidcrn(m)       | Elaidic carnitine                          | Mitochondria |
| 2108 | 20557m       | etfox(m)          | Electron transfer flavoprotein oxidized    | Mitochondria |
| 2109 | 20558m       | etfrd(m)          | Electron transfer flavoprotein reduced     | Mitochondria |
| 2110 | 478m         | fad(m)            | Flavin adenine dinucleotide oxidized       | Mitochondria |
| 2111 | 42m          | fadh2(m)          | Flavin adenine dinucleotide reduced        | Mitochondria |
| 2112 | 340m         | fald(m)           | Formaldehyde                               | Mitochondria |
| 2113 | 312m         | fe2(m)            | Fe2+                                       | Mitochondria |

| Row  | Metabolite # | Abbreviation | Metabolite Name                 | Compartment  |
|------|--------------|--------------|---------------------------------|--------------|
| 2114 | 10041m       | ficytC(m)    | Ferricytochrome c               | Mitochondria |
| 2115 | 1084m        | ficytc(m)    | Ferricytochrome c               | Mitochondria |
| 2116 | 10042m       | foeytC(m)    | Ferrocyclochrome C              | Mitochondria |
| 2117 | 1085m        | foeytc(m)    | Ferrocyclochrome c              | Mitochondria |
| 2118 | 334m         | for(m)       | Formate                         | Mitochondria |
| 2119 | 1081m        | fum(m)       | Fumarate                        | Mitochondria |
| 2120 | 10800m       | gcald(m)     | Glycolaldehyde                  | Mitochondria |
| 2121 | 321m         | gdp(m)       | GDP                             | Mitochondria |
| 2122 | 18308m       | glac(m)      | D-glucurono-6,3-lactone         | Mitochondria |
| 2123 | 632m         | glcr(m)      | D-Glucarate                     | Mitochondria |
| 2124 | 661m         | gln-D(m)     | D-Glutamine                     | Mitochondria |
| 2125 | 11299m       | gln-L(m)     | L-Glutamine                     | Mitochondria |
| 2126 | 273m         | glu-D(m)     | D-Glutamate                     | Mitochondria |
| 2127 | 313m         | glu-L(m)     | L-Glutamate                     | Mitochondria |
| 2128 | 2458m        | glu5p(m)     | L-Glutamate 5-phosphate         | Mitochondria |
| 2129 | 761m         | glu5sa(m)    | L-Glutamate 5-semialdehyde      | Mitochondria |
| 2130 | 356m         | glutcoa(m)   | Glutaryl-CoA                    | Mitochondria |
| 2131 | 329m         | glx(m)       | Glyoxylate                      | Mitochondria |
| 2132 | 323m         | gly(m)       | Glycine                         | Mitochondria |
| 2133 | 503m         | glyb(m)      | Glycine betaine                 | Mitochondria |
| 2134 | 1077m        | glyc(m)      | Glycerol                        | Mitochondria |
| 2135 | 55m          | glyc3p(m)    | Glycerol 3-phosphate            | Mitochondria |
| 2136 | 237m         | glyclt(m)    | Glycolate                       | Mitochondria |
| 2137 | 226m         | gmp(m)       | GMP                             | Mitochondria |
| 2138 | 5279m        | gsn(m)       | Guanosine                       | Mitochondria |
| 2139 | 1087m        | gthox(m)     | Oxidized glutathione            | Mitochondria |
| 2140 | 11388m       | gthrd(m)     | Reduced glutathione             | Mitochondria |
| 2141 | 327m         | gtp(m)       | GTP                             | Mitochondria |
| 2142 | 1049m        | h(m)         | H+                              | Mitochondria |
| 2143 | 3m           | h2co3(m)     | carbonic acid                   | Mitochondria |
| 2144 | 317m         | h2o(m)       | H2O                             | Mitochondria |
| 2145 | 315m         | h2o2(m)      | Hydrogen peroxide               | Mitochondria |
| 2146 | 144m         | hco3(m)      | Bicarbonate                     | Mitochondria |
| 2147 | 21857m       | hdcecrn(m)   | Hexadecenoyl carnitine          | Mitochondria |
| 2148 | 8780m        | hdcoa(m)     | Hexadecenoyl-CoA (n-C16:1CoA)   | Mitochondria |
| 2149 | 3801m        | hdd2coa(m)   | trans-Hexadec-2-enoyl-CoA       | Mitochondria |
| 2150 | 26402m       | hdd2crn(m)   | trans-Hexadec-2-enoyl carnitine | Mitochondria |
| 2151 | 11013m       | hexccoa(m)   | Hexacosanoyl-CoA (n-C26:0CoA)   | Mitochondria |
| 2152 | 25969m       | hexccrn(m)   | hexacosanoyl carnitine          | Mitochondria |
| 2153 | 191m         | hmgcoa(m)    | Hydroxymethylglutaryl-CoA       | Mitochondria |
| 2154 | 22502m       | hpdccoa(m)   | heptadecanoyl coa               | Mitochondria |
| 2155 | 22758m       | hpdccrn(m)   | heptadecanoyl carnitine         | Mitochondria |
| 2156 | 242m         | hpyr(m)      | Hydroxypyruvate                 | Mitochondria |
| 2157 | 1119m        | ibcoa(m)     | Isobutyryl-CoA                  | Mitochondria |
| 2158 | 158m         | icit(m)      | Isocitrate                      | Mitochondria |
| 2159 | 1125m        | id3acald(m)  | Indole-3-acetaldehyde           | Mitochondria |
| 2160 | 1067m        | idp(m)       | IDP                             | Mitochondria |
| 2161 | 410m         | ile-L(m)     | L-Isoleucine                    | Mitochondria |
| 2162 | 2132m        | im4ac(m)     | Imidazole-4-acetate             | Mitochondria |
| 2163 | 3706m        | im4act(m)    | Imidazole-4-acetaldehyde        | Mitochondria |
| 2164 | 1090m        | imp(m)       | IMP                             | Mitochondria |
| 2165 | 9022m        | ind3ac(m)    | Indole-3-acetate                | Mitochondria |
| 2166 | 147m         | ins(m)       | Inosine                         | Mitochondria |

| Row  | Metabolite # | Abbreviation | Metabolite Name                                       | Compartment  |
|------|--------------|--------------|-------------------------------------------------------|--------------|
| 2167 | 359m         | itaccoa(m)   | Itaconyl-CoA                                          | Mitochondria |
| 2168 | 104m         | itacon(m)    | Itaconate                                             | Mitochondria |
| 2169 | 1050m        | itp(m)       | ITP                                                   | Mitochondria |
| 2170 | 1908m        | ivcoa(m)     | Isovaleryl-CoA                                        | Mitochondria |
| 2171 | 304m         | lac-D(m)     | D-Lactate                                             | Mitochondria |
| 2172 | 10931m       | lac-L(m)     | L-Lactate                                             | Mitochondria |
| 2173 | 491m         | lald-D(m)    | D-Lactaldehyde                                        | Mitochondria |
| 2174 | 420m         | lald-L(m)    | L-Lactaldehyde                                        | Mitochondria |
| 2175 | 1082m        | leu-L(m)     | L-Leucine                                             | Mitochondria |
| 2176 | 18490m       | lgncco(m)    | lignoceryyl coenzyme A                                | Mitochondria |
| 2177 | 25968m       | lgnccrn(m)   | lignoceryl carnitine                                  | Mitochondria |
| 2178 | 2477m        | lgt-S(m)     | (R)-S-Lactoylglutathione                              | Mitochondria |
| 2179 | 18482m       | lnelcco(m)   | linoelaidyl coenzyme A                                | Mitochondria |
| 2180 | 25975m       | lnelccrn(m)  | Linoelaidyl carnitine                                 | Mitochondria |
| 2181 | 18481m       | lnlcco(m)    | linoleic coenzyme A                                   | Mitochondria |
| 2182 | 25976m       | lnlccrn(m)   | Linoleyl carnitine                                    | Mitochondria |
| 2183 | 18480m       | lnlncco(m)   | alpha-Linolenoyl-CoA                                  | Mitochondria |
| 2184 | 25978m       | lnlnccrn(m)  | alpha-linolenyl carnitine                             | Mitochondria |
| 2185 | 2277m        | lnlncgco(m)  | gamma-linolenoyl-CoA                                  | Mitochondria |
| 2186 | 25977m       | lnlncgcrn(m) | gamma-linolenyl carnitine                             | Mitochondria |
| 2187 | 296m         | lpam(m)      | Lipoamide                                             | Mitochondria |
| 2188 | 1657m        | lpro(m)      | Lipoylprotein                                         | Mitochondria |
| 2189 | 328m         | lys-L(m)     | L-Lysine                                              | Mitochondria |
| 2190 | 230m         | mal-L(m)     | L-Malate                                              | Mitochondria |
| 2191 | 50m          | malACP(m)    | Malonyl-[acyl-carrier protein]                        | Mitochondria |
| 2192 | 11267m       | malco(m)     | Malonyl-CoA                                           | Mitochondria |
| 2193 | 794m         | mercppy(m)   | Mercaptopyruvate                                      | Mitochondria |
| 2194 | 4468m        | mesco(m)     | Mesaconyl-CoA                                         | Mitochondria |
| 2195 | 1409m        | mescon(m)    | Mesaconate                                            | Mitochondria |
| 2196 | 433m         | methf(m)     | 5,10-Methenyltetrahydrofolate                         | Mitochondria |
| 2197 | 11043m       | mlthf(m)     | 5,10-Methylenetetrahydrofolate                        | Mitochondria |
| 2198 | 943m         | mmcoa-R(m)   | (R)-Methylmalonyl-CoA                                 | Mitochondria |
| 2199 | 451m         | mmcoa-S(m)   | (S)-Methylmalonyl-CoA                                 | Mitochondria |
| 2200 | 277m         | msa(m)       | Malonate semialdehyde                                 | Mitochondria |
| 2201 | 7923m        | n4abutn(m)   | N4-Acetylaminobutanal                                 | Mitochondria |
| 2202 | 466m         | nad(m)       | Nicotinamide adenine dinucleotide                     | Mitochondria |
| 2203 | 467m         | nadh(m)      | Nicotinamide adenine dinucleotide - reduced           | Mitochondria |
| 2204 | 469m         | nadp(m)      | Nicotinamide adenine dinucleotide phosphate           | Mitochondria |
| 2205 | 468m         | nadph(m)     | Nicotinamide adenine dinucleotide phosphate - reduced | Mitochondria |
| 2206 | 476m         | nh4(m)       | Ammonium                                              | Mitochondria |
| 2207 | 776m         | nicrnt(m)    | Nicotinate D-ribonucleotide                           | Mitochondria |
| 2208 | 77m          | nmn(m)       | NMN                                                   | Mitochondria |
| 2209 | 18485m       | nrvncco(m)   | nervonyl coenzyme A                                   | Mitochondria |
| 2210 | 25974m       | nrvnccrn(m)  | Nervonyl carnitine                                    | Mitochondria |
| 2211 | 470m         | o2(m)        | O2                                                    | Mitochondria |
| 2212 | 461m         | o2s(m)       | Superoxide anion                                      | Mitochondria |
| 2213 | 322m         | oaa(m)       | Oxaloacetate                                          | Mitochondria |
| 2214 | 10688m       | occoa(m)     | Octanoyl-CoA (n-C8:0CoA)                              | Mitochondria |
| 2215 | 8401m        | od2coa(m)    | trans-Octadec-2-enoyl-CoA                             | Mitochondria |
| 2216 | 8782m        | odecoa(m)    | Octadecenoyl-CoA (n-C18:1CoA)                         | Mitochondria |
| 2217 | 11885m       | odecrn(m)    | octadecenoyl carnitine                                | Mitochondria |
| 2218 | 1021m        | ohl(m)       | hydroxide ion                                         | Mitochondria |

| Row  | Metabolite # | Abbreviation   | Metabolite Name                                | Compartment  |
|------|--------------|----------------|------------------------------------------------|--------------|
| 2219 | 1304m        | orn(m)         | Ornithine                                      | Mitochondria |
| 2220 | 18536m       | pa_hs(m)       | phosphatidic acid (homo sapiens)               | Mitochondria |
| 2221 | 19051m       | pchol_hs(m)    | Phosphatidylcholine (homo sapiens)             | Mitochondria |
| 2222 | 10038m       | pcreat(m)      | Phosphocreatine                                | Mitochondria |
| 2223 | 15675m       | pcrn(m)        | propionyl-carnitine                            | Mitochondria |
| 2224 | 19050m       | pe_hs(m)       | phosphatidylethanolamine (homo sapiens)        | Mitochondria |
| 2225 | 344m         | pep(m)         | Phosphoenolpyruvate                            | Mitochondria |
| 2226 | 19700m       | peracd(m)      | Perillic acid                                  | Mitochondria |
| 2227 | 1048m        | phe-L(m)       | L-Phenylalanine                                | Mitochondria |
| 2228 | 11520m       | pHEME(m)       | Protoheme                                      | Mitochondria |
| 2229 | 240m         | phpyr(m)       | Phenylpyruvate                                 | Mitochondria |
| 2230 | 472m         | pi(m)          | Phosphate                                      | Mitochondria |
| 2231 | 11029m       | pmtcoa(m)      | Palmitoyl-CoA (n-C16:0CoA)                     | Mitochondria |
| 2232 | 2244m        | pmtcrn(m)      | L-Palmitoylcarnitine                           | Mitochondria |
| 2233 | 10928m       | pnto-R(m)      | (R)-Pantothenate                               | Mitochondria |
| 2234 | 238m         | ppa(m)         | Propionate (n-C3:0)                            | Mitochondria |
| 2235 | 1064m        | ppcoa(m)       | Propanoyl-CoA                                  | Mitochondria |
| 2236 | 475m         | ppi(m)         | Diphosphate                                    | Mitochondria |
| 2237 | 1772m        | ppp9(m)        | Protoporphyrin                                 | Mitochondria |
| 2238 | 864m         | pppg9(m)       | Protoporphyrinogen IX                          | Mitochondria |
| 2239 | 2452m        | pppi(m)        | Inorganic triphosphate                         | Mitochondria |
| 2240 | 10681m       | prgnlone(m)    | Pregnenolone                                   | Mitochondria |
| 2241 | 229m         | pro-L(m)       | L-Proline                                      | Mitochondria |
| 2242 | 744m         | prpcoa(m)      | Propenoyl-CoA                                  | Mitochondria |
| 2243 | 19052m       | ps_hs(m)       | phosphatidylserine (homo sapiens)              | Mitochondria |
| 2244 | 22500m       | ptdcacoa(m)    | pentadecanoyl Coenzyme A                       | Mitochondria |
| 2245 | 22757m       | ptdcacr(m)     | pentadecenoyl carnitine                        | Mitochondria |
| 2246 | 1094m        | ptrc(m)        | Putrescine                                     | Mitochondria |
| 2247 | 1130m        | pyam5p(m)      | Pyridoxamine 5'-phosphate                      | Mitochondria |
| 2248 | 479m         | pydx5p(m)      | Pyridoxal 5'-phosphate                         | Mitochondria |
| 2249 | 1851m        | pylald(m)      | Perillyl aldehyde                              | Mitochondria |
| 2250 | 311m         | pyr(m)         | Pyruvate                                       | Mitochondria |
| 2251 | 406m         | q10(m)         | Ubiquinone-10                                  | Mitochondria |
| 2252 | 11879m       | q10h2(m)       | Ubiquinol-10                                   | Mitochondria |
| 2253 | 1999m        | r5p(m)         | alpha-D-Ribose 5-phosphate                     | Mitochondria |
| 2254 | 8994m        | sacrcp-L(m)    | L-Saccharopine                                 | Mitochondria |
| 2255 | 271m         | sarcs(m)       | Sarcosine                                      | Mitochondria |
| 2256 | 339m         | ser-L(m)       | L-Serine                                       | Mitochondria |
| 2257 | 15786m       | sl-L(m)        | L-sulfolactate                                 | Mitochondria |
| 2258 | 1060m        | so3(m)         | Sulfite                                        | Mitochondria |
| 2259 | 335m         | so4(m)         | Sulfate                                        | Mitochondria |
| 2260 | 8781m        | stcoa(m)       | Stearoyl-CoA (n-C18:0CoA)                      | Mitochondria |
| 2261 | 11884m       | stcrn(m)       | stearoylcarnitine                              | Mitochondria |
| 2262 | 18492m       | strdncco(m)    | stearidonyl coenzyme A                         | Mitochondria |
| 2263 | 25985m       | strdnccrn(m)   | stearidonyl carnitine                          | Mitochondria |
| 2264 | 325m         | succ(m)        | Succinate                                      | Mitochondria |
| 2265 | 1058m        | succoa(m)      | Succinyl-CoA                                   | Mitochondria |
| 2266 | 284m         | sucsal(m)      | Succinic semialdehyde                          | Mitochondria |
| 2267 | 19702m       | t2m26dcoa(m)   | trans-2-Methyl-5-isopropylhexa-2,5-dienoyl-CoA | Mitochondria |
| 2268 | 1428m        | tcynt(m)       | Thiocyanate                                    | Mitochondria |
| 2269 | 1862m        | tdcoa(m)       | Tetradecanoyl-CoA (n-C14:0CoA)                 | Mitochondria |
| 2270 | 18513m       | tetpent3coa(m) | tetracosapentaenoyl coenzyme A, n-3            | Mitochondria |
| 2271 | 25991m       | tetpent3crn(m) | tetracosapentaenoyl carnitine                  | Mitochondria |

| Row  | Metabolite # | Abbreviation    | Metabolite Name                                                                    | Compartment  |
|------|--------------|-----------------|------------------------------------------------------------------------------------|--------------|
| 2272 | 18509m       | tetpent6coa(m)  | tetracosapentaenoyl coenzyme A, n-6                                                | Mitochondria |
| 2273 | 25992m       | tetpent6crn(m)  | tetracosapentaenoyl carnitine                                                      | Mitochondria |
| 2274 | 18511m       | tettet6coa(m)   | tetracosatetraenoyl coenzyme A                                                     | Mitochondria |
| 2275 | 25986m       | tettet6crn(m)   | Tetracosatetraenoyl carnitine                                                      | Mitochondria |
| 2276 | 852m         | thcholst(m)     | 3alpha,7alpha,12alpha-Trihydroxy-5beta-cholestan-26-al                             | Mitochondria |
| 2277 | 3477m        | thcholstoic(m)  | 3alpha,7alpha,12alpha-Trihydroxy-5beta-cholestanoate                               | Mitochondria |
| 2278 | 1065m        | thf(m)          | 5,6,7,8-Tetrahydrofolate                                                           | Mitochondria |
| 2279 | 210m         | thm(m)          | Thiamin                                                                            | Mitochondria |
| 2280 | 866m         | thmmp(m)        | Thiamin monophosphate                                                              | Mitochondria |
| 2281 | 341m         | thmpp(m)        | Thiamine diphosphate                                                               | Mitochondria |
| 2282 | 5269m        | thymd(m)        | Thymidine                                                                          | Mitochondria |
| 2283 | 18486m       | tmndnccoa(m)    | timnodonyl coenzyme A                                                              | Mitochondria |
| 2284 | 25988m       | tmndnccrn(m)    | Timnodonyl carnitine                                                               | Mitochondria |
| 2285 | 181m         | trdox(m)        | Oxidized thioredoxin                                                               | Mitochondria |
| 2286 | 180m         | trdrd(m)        | Reduced thioredoxin                                                                | Mitochondria |
| 2287 | 164m         | tsul(m)         | Thiosulfate                                                                        | Mitochondria |
| 2288 | 26814m       | ttocrn(m)       | tetradecanoyl carnitine                                                            | Mitochondria |
| 2289 | 1051m        | tyr-L(m)        | L-Tyrosine                                                                         | Mitochondria |
| 2290 | 477m         | udp(m)          | UDP                                                                                | Mitochondria |
| 2291 | 1068m        | ump(m)          | UMP                                                                                | Mitochondria |
| 2292 | 1054m        | urea(m)         | Urea                                                                               | Mitochondria |
| 2293 | 10727m       | uri(m)          | Uridine                                                                            | Mitochondria |
| 2294 | 345m         | utp(m)          | UTP                                                                                | Mitochondria |
| 2295 | 18479m       | vacccoa(m)      | vaccenyl coenzyme A                                                                | Mitochondria |
| 2296 | 25973m       | vaccrn(m)       | Vaccenyl carnitine                                                                 | Mitochondria |
| 2297 | 250m         | val-L(m)        | L-Valine                                                                           | Mitochondria |
| 2298 | 20013m       | vitd2(m)        | Vitamin D2                                                                         | Mitochondria |
| 2299 | 20001m       | vitd3(m)        | Vitamin D3                                                                         | Mitochondria |
| 2300 | 4060m        | xol27oh(m)      | 27-Hydroxycholesterol                                                              | Mitochondria |
| 2301 | 3381m        | xol7ah2(m)      | 3alpha,7alpha-Dihydroxy-5beta-cholestane                                           | Mitochondria |
| 2302 | 3375m        | xol7ah2al(m)    | 3alpha,7alpha-Dihydroxy-5beta-cholestan-26-al                                      | Mitochondria |
| 2303 | 3374m        | xol7ah3(m)      | 3alpha,7alpha,26-Trihydroxy-5beta-cholestane                                       | Mitochondria |
| 2304 | 3384m        | xoldiolone(m)   | 7alpha,12alpha-Dihydroxycholest-4-en-3-one                                         | Mitochondria |
| 2305 | 3379m        | xoltetrol(m)    | 3alpha,7alpha,12alpha,26-Tetrahydroxy-5beta-cholestane                             | Mitochondria |
| 2306 | 3383m        | xoltriol(m)     | 3alpha,7alpha,12alpha-Trihydroxy-5beta-cholestane                                  | Mitochondria |
| 2307 | 22815n       | 13-cis-oretn(n) | 13-cis-oxo-retinoic acid                                                           | Nucleus      |
| 2308 | 22814n       | 13-cis-retn(n)  | 13-cis-retinoate                                                                   | Nucleus      |
| 2309 | 9005n        | 35cgm(n)        | 3',5'-Cyclic GMP                                                                   | Nucleus      |
| 2310 | 11000n       | 6p(h)(n)        | 6-Pyruvoyl-5,6,7,8-tetrahydropterin                                                | Nucleus      |
| 2311 | 4292n        | Ndmelys(n)      | Protein N6,N6-dimethyl-L-lysine                                                    | Nucleus      |
| 2312 | 10936n       | Nmelys(n)       | Histone N6-methyl-L-lysine                                                         | Nucleus      |
| 2313 | 4293n        | Ntmelys(n)      | Protein N6,N6,N6-trimethyl-L-lysine                                                | Nucleus      |
| 2314 | 11537n       | accoa(n)        | Acetyl-CoA                                                                         | Nucleus      |
| 2315 | 1617n        | ach(n)          | Acetylcholine                                                                      | Nucleus      |
| 2316 | 134n         | acnam(n)        | N-Acetylneuraminic acid                                                            | Nucleus      |
| 2317 | 471n         | adp(n)          | ADP                                                                                | Nucleus      |
| 2318 | 310n         | ahcys(n)        | S-Adenosyl-L-homocysteine                                                          | Nucleus      |
| 2319 | 3611n        | ahdt(n)         | 2-Amino-4-hydroxy-6-(erythro-1,2,3-trihydroxypropyl) dihydropteridine triphosphate | Nucleus      |

| Row  | Metabolite # | Abbreviation | Metabolite Name                             | Compartment |
|------|--------------|--------------|---------------------------------------------|-------------|
| 2320 | 1086n        | amet(n)      | S-Adenosyl-L-methionine                     | Nucleus     |
| 2321 | 465n         | atp(n)       | ATP                                         | Nucleus     |
| 2322 | 4297n        | biocyt(n)    | Biocytin                                    | Nucleus     |
| 2323 | 1079n        | btn(n)       | Biotin                                      | Nucleus     |
| 2324 | 1073n        | cdp(n)       | CDP                                         | Nucleus     |
| 2325 | 1075n        | chol(n)      | Choline                                     | Nucleus     |
| 2326 | 11376n       | cmp(n)       | CMP                                         | Nucleus     |
| 2327 | 1088n        | cmpacna(n)   | CMP-N-acetylneuramate                       | Nucleus     |
| 2328 | 474n         | co2(n)       | CO2                                         | Nucleus     |
| 2329 | 473n         | coa(n)       | Coenzyme A                                  | Nucleus     |
| 2330 | 338n         | ctp(n)       | CTP                                         | Nucleus     |
| 2331 | 92n          | cytd(n)      | Cytidine                                    | Nucleus     |
| 2332 | 265n         | dadp(n)      | dADP                                        | Nucleus     |
| 2333 | 18537n       | dag_hs(n)    | diacylglycerol (homo sapiens)               | Nucleus     |
| 2334 | 1091n        | datp(n)      | dATP                                        | Nucleus     |
| 2335 | 5272n        | dcdp(n)      | dCDP                                        | Nucleus     |
| 2336 | 290n         | dcmp(n)      | dCMP                                        | Nucleus     |
| 2337 | 78n          | dctp(n)      | dCTP                                        | Nucleus     |
| 2338 | 10918n       | dcyt(n)      | Deoxycytidine                               | Nucleus     |
| 2339 | 194n         | dgdp(n)      | dGDP                                        | Nucleus     |
| 2340 | 143n         | dgtp(n)      | dGTP                                        | Nucleus     |
| 2341 | 1032n        | didp(n)      | dIDP                                        | Nucleus     |
| 2342 | 1033n        | ditp(n)      | dITP                                        | Nucleus     |
| 2343 | 18424n       | dna(n)       | DNA                                         | Nucleus     |
| 2344 | 18425n       | dna5mtc(n)   | DNA 5-methylcytosine                        | Nucleus     |
| 2345 | 724n         | dnad(n)      | Deamino-NAD+                                | Nucleus     |
| 2346 | 196n         | dtdp(n)      | dTDP                                        | Nucleus     |
| 2347 | 79n          | dttp(n)      | dTTP                                        | Nucleus     |
| 2348 | 1034n        | dudp(n)      | dUDP                                        | Nucleus     |
| 2349 | 198n         | dump(n)      | dUMP                                        | Nucleus     |
| 2350 | 355n         | duri(n)      | Deoxyuridine                                | Nucleus     |
| 2351 | 80n          | dutp(n)      | dUTP                                        | Nucleus     |
| 2352 | 334n         | for(n)       | Formate                                     | Nucleus     |
| 2353 | 321n         | gdp(n)       | GDP                                         | Nucleus     |
| 2354 | 226n         | gmp(n)       | GMP                                         | Nucleus     |
| 2355 | 327n         | gtp(n)       | GTP                                         | Nucleus     |
| 2356 | 1049n        | h(n)         | H+                                          | Nucleus     |
| 2357 | 317n         | h2o(n)       | H2O                                         | Nucleus     |
| 2358 | 315n         | h2o2(n)      | Hydrogen peroxide                           | Nucleus     |
| 2359 | 20388n       | hretn(n)     | 4 hydroxy retinoic acid                     | Nucleus     |
| 2360 | 1067n        | idp(n)       | IDP                                         | Nucleus     |
| 2361 | 1050n        | itp(n)       | ITP                                         | Nucleus     |
| 2362 | 328n         | lys-L(n)     | L-Lysine                                    | Nucleus     |
| 2363 | 996n         | mi13456p(n)  | 1D-myo-Inositol 1,3,4,5,6-pentakisphosphate | Nucleus     |
| 2364 | 7140n        | mi1345p(n)   | 1D-myo-Inositol 1,3,4,5-tetrakisphosphate   | Nucleus     |
| 2365 | 11398n       | mi1346p(n)   | 1D-myo-Inositol 1,3,4,6-tetrakisphosphate   | Nucleus     |
| 2366 | 19579n       | mi1456p(n)   | 1D-myo-Inositol 1,4,5,6-tetrakisphosphate   | Nucleus     |
| 2367 | 8995n        | mi145p(n)    | 1D-myo-Inositol 1,4,5-trisphosphate         | Nucleus     |
| 2368 | 950n         | mi14p(n)     | 1D-myo-Inositol 1,4-bisphosphate            | Nucleus     |
| 2369 | 8983n        | mi1p-D(n)    | 1D-myo-Inositol 1-phosphate                 | Nucleus     |
| 2370 | 938n         | minohp(n)    | myo-Inositol hexakisphosphate               | Nucleus     |
| 2371 | 466n         | nad(n)       | Nicotinamide adenine dinucleotide           | Nucleus     |
| 2372 | 469n         | nadp(n)      | Nicotinamide adenine dinucleotide phosphate | Nucleus     |

| Row  | Metabolite # | Abbreviation      | Metabolite Name                                           | Compartment           |
|------|--------------|-------------------|-----------------------------------------------------------|-----------------------|
| 2373 | 468n         | nadph(n)          | Nicotinamide adenine dinucleotide phosphate - reduced     | Nucleus               |
| 2374 | 476n         | nh4(n)            | Ammonium                                                  | Nucleus               |
| 2375 | 776n         | nicrnt(n)         | Nicotinate D-ribonucleotide                               | Nucleus               |
| 2376 | 77n          | nmn(n)            | NMN                                                       | Nucleus               |
| 2377 | 470n         | o2(n)             | O2                                                        | Nucleus               |
| 2378 | 461n         | o2s(n)            | Superoxide anion                                          | Nucleus               |
| 2379 | 22810n       | oretn(n)          | 4-oxo-retonoic acid                                       | Nucleus               |
| 2380 | 18536n       | pa_hs(n)          | phosphatidic acid (homo sapiens)                          | Nucleus               |
| 2381 | 4431n        | pail345p_hs(n)    | phosphatidylinositol-3,4,5-trisphosphate (Homo sapiens)   | Nucleus               |
| 2382 | 19605n       | pail34p_hs(n)     | phosphatidylinositol-3,4-bisphosphate (Homo sapiens)      | Nucleus               |
| 2383 | 3992n        | pail3p_hs(n)      | 1-Phosphatidyl-1D-myo-inositol 3-phosphate (Homo sapiens) | Nucleus               |
| 2384 | 19333n       | pail45p_hs(n)     | phosphatidylinositol 4,5-bisphosphate (Homo sapiens)      | Nucleus               |
| 2385 | 19332n       | pail4p_hs(n)      | 1-Phosphatidyl-1D-myo-inositol 4-phosphate (Homo sapiens) | Nucleus               |
| 2386 | 19479n       | pail5p_hs(n)      | 1-Phosphatidyl-1D-myo-inositol 5-phosphate (Homo sapiens) | Nucleus               |
| 2387 | 19327n       | pail_hs(n)        | phosphatidylinositol (homo sapiens)                       | Nucleus               |
| 2388 | 5307n        | peplys(n)         | Peptidyl-L-lysine                                         | Nucleus               |
| 2389 | 472n         | pi(n)             | Phosphate                                                 | Nucleus               |
| 2390 | 475n         | ppi(n)            | Diphosphate                                               | Nucleus               |
| 2391 | 19580n       | ppmi12346p(n)     | 5-Diphosphoinositol pentakisphosphate                     | Nucleus               |
| 2392 | 19581n       | ppmi1346p(n)      | Diphosphoinositol tetrakisphosphate                       | Nucleus               |
| 2393 | 2452n        | pppi(n)           | Inorganic triphosphate                                    | Nucleus               |
| 2394 | 11153n       | retn(n)           | Retinoate                                                 | Nucleus               |
| 2395 | 4207n        | seahcys(n)        | Se-Adenosylselenohomocysteine                             | Nucleus               |
| 2396 | 4301n        | seasmet(n)        | Se-Adenosylselenomethionine                               | Nucleus               |
| 2397 | 135n         | thbpt(n)          | Tetrahydrobiopterin                                       | Nucleus               |
| 2398 | 477n         | udp(n)            | UDP                                                       | Nucleus               |
| 2399 | 1068n        | ump(n)            | UMP                                                       | Nucleus               |
| 2400 | 10727n       | uri(n)            | Uridine                                                   | Nucleus               |
| 2401 | 345n         | utp(n)            | UTP                                                       | Nucleus               |
| 2402 | 3407r        | 11docrtsl(r)      | 11-Deoxycortisol                                          | Endoplasmic Reticulum |
| 2403 | 2404r        | 11docrtstrn(r)    | 11-Deoxycorticosterone                                    | Endoplasmic Reticulum |
| 2404 | 20447r       | 12harachd(r)      | 12 hydroxy arachidonic acid                               | Endoplasmic Reticulum |
| 2405 | 22814r       | 13-cis-retn(r)    | 13-cis-retinoate                                          | Endoplasmic Reticulum |
| 2406 | 22816r       | 13-cis-retnglc(r) | 13-cis-retinoyl glucuronide                               | Endoplasmic Reticulum |
| 2407 | 3713r        | 17ahprgnlone(r)   | 17alpha-Hydroxyprogrenolone                               | Endoplasmic Reticulum |
| 2408 | 769r         | 17ahprgstrn(r)    | 17alpha-Hydroxyprogesterone                               | Endoplasmic Reticulum |
| 2409 | 20446r       | 18harachd(r)      | 18 hydroxy arachidonic acid                               | Endoplasmic Reticulum |

| Row  | Metabolite # | Abbreviation         | Metabolite Name                                                   | Compartment           |
|------|--------------|----------------------|-------------------------------------------------------------------|-----------------------|
| 2410 | 9128r        | 44mctr(r)            | 4,4-dimethylcholesta-8,14,24-trienol                              | Endoplasmic Reticulum |
| 2411 | 3689r        | 44mzym(r)            | 4,4-dimethylzymosterol                                            | Endoplasmic Reticulum |
| 2412 | 913r         | 4hpro-LT(r)          | trans-4-Hydroxy-L-proline                                         | Endoplasmic Reticulum |
| 2413 | 9129r        | 4mzym_int1(r)        | 4-Methylzymosterol intermediate 1                                 | Endoplasmic Reticulum |
| 2414 | 9130r        | 4mzym_int2(r)        | 4-Methylzymosterol intermediate 2                                 | Endoplasmic Reticulum |
| 2415 | 10712r       | 5adtststerone(r)     | 5alpha-Dihydrotestosterone                                        | Endoplasmic Reticulum |
| 2416 | 22786r       | 5adtststeroneglc(r)  | 5alpha-Dihydrotestosterone glucuronide                            | Endoplasmic Reticulum |
| 2417 | 20402r       | 6htststerone(r)      | 6 beta hydroxy testosterone                                       | Endoplasmic Reticulum |
| 2418 | 182r         | 6pgc(r)              | 6-Phospho-D-gluconate                                             | Endoplasmic Reticulum |
| 2419 | 963r         | 6ppl(r)              | 6-phospho-D-glucono-1,5-lactone                                   | Endoplasmic Reticulum |
| 2420 | 834r         | 7dhchsterol(r)       | 7-Dehydrocholesterol                                              | Endoplasmic Reticulum |
| 2421 | 15102r       | Asn-X-Ser/Thr(r)     | protein-linked asparagine residue (N-glycosylation site)          | Endoplasmic Reticulum |
| 2422 | 4293r        | Ntmelys(r)           | Protein N6,N6,N6-trimethyl-L-lysine                               | Endoplasmic Reticulum |
| 2423 | 18469r       | R1coa_hs(r)          | R group 1 Coenzyme A homo sapiens                                 | Endoplasmic Reticulum |
| 2424 | 18470r       | R2coa_hs(r)          | R group 2 Coenzyme A homo sapiens                                 | Endoplasmic Reticulum |
| 2425 | 20362r       | Ser-Gly/Ala-X-Gly(r) | protein-linked serine residue (glycosaminoglycan attachment site) | Endoplasmic Reticulum |
| 2426 | 689r         | Ssq23epx(r)          | (S)-Squalene-2,3-epoxide                                          | Endoplasmic Reticulum |
| 2427 | 1052r        | acald(r)             | Acetaldehyde                                                      | Endoplasmic Reticulum |
| 2428 | 11537r       | accoa(r)             | Acetyl-CoA                                                        | Endoplasmic Reticulum |
| 2429 | 7471r        | acrn(r)              | O-Acetylcarnitine                                                 | Endoplasmic Reticulum |
| 2430 | 471r         | adp(r)               | ADP                                                               | Endoplasmic Reticulum |
| 2431 | 2661r        | ahandrostan(r)       | 3alpha-Hydroxy-5beta-androstan-17-one                             | Endoplasmic Reticulum |
| 2432 | 20819r       | ahandrostanglc(r)    | Etiocholan-3alpha-ol-17-one 3-glucuronide                         | Endoplasmic Reticulum |
| 2433 | 310r         | ahcys(r)             | S-Adenosyl-L-homocysteine                                         | Endoplasmic Reticulum |
| 2434 | 314r         | akg(r)               | 2-Oxoglutarate                                                    | Endoplasmic Reticulum |
| 2435 | 1086r        | amet(r)              | S-Adenosyl-L-methionine                                           | Endoplasmic Reticulum |



| Row  | Metabolite # | Abbreviation   | Metabolite Name                                            | Compartment           |
|------|--------------|----------------|------------------------------------------------------------|-----------------------|
| 2436 | 309r         | amp(r)         | AMP                                                        | Endoplasmic Reticulum |
| 2437 | 2893r        | andrstandn(r)  | androstanedione                                            | Endoplasmic Reticulum |
| 2438 | 17675r       | andrstndn(r)   | Androstenedione                                            | Endoplasmic Reticulum |
| 2439 | 352r         | andrstrn(r)    | Androsterone                                               | Endoplasmic Reticulum |
| 2440 | 20815r       | andrstrnglc(r) | androsterone glucuronide                                   | Endoplasmic Reticulum |
| 2441 | 11890r       | arachd(r)      | arachidonic acid                                           | Endoplasmic Reticulum |
| 2442 | 465r         | atp(r)         | ATP                                                        | Endoplasmic Reticulum |
| 2443 | 4279r        | bildglcur(r)   | Bilirubin beta-diglycuronide                               | Endoplasmic Reticulum |
| 2444 | 1942r        | bilglcur(r)    | Bilirubin monoglycuronide                                  | Endoplasmic Reticulum |
| 2445 | 101r         | bilirub(r)     | Bilirubin                                                  | Endoplasmic Reticulum |
| 2446 | 10989r       | bz(r)          | Benzoate                                                   | Endoplasmic Reticulum |
| 2447 | 11004r       | cbp(r)         | Carbamoyl phosphate                                        | Endoplasmic Reticulum |
| 2448 | 3369r        | chlstol(r)     | Cholesta-7,24-dien-3beta-ol                                | Endoplasmic Reticulum |
| 2449 | 1075r        | chol(r)        | Choline                                                    | Endoplasmic Reticulum |
| 2450 | 3507r        | cholcoar(r)    | 3alpha,7alpha,12alpha-Trihydroxy-5beta-cholestanoyl-CoA    | Endoplasmic Reticulum |
| 2451 | 17159r       | cholcoas(r)    | 3alpha,7alpha,12alpha-Trihydroxy-5beta-cholestanoyl-CoA(S) | Endoplasmic Reticulum |
| 2452 | 252r         | chsterol(r)    | Cholesterol                                                | Endoplasmic Reticulum |
| 2453 | 26330r       | chsterols(r)   | cholesterol sulfate                                        | Endoplasmic Reticulum |
| 2454 | 474r         | co2(r)         | CO2                                                        | Endoplasmic Reticulum |
| 2455 | 473r         | coa(r)         | Coenzyme A                                                 | Endoplasmic Reticulum |
| 2456 | 559r         | coke(r)        | cocaine                                                    | Endoplasmic Reticulum |
| 2457 | 11168r       | cortsn(r)      | Cortisone                                                  | Endoplasmic Reticulum |
| 2458 | 19478r       | crm_hs(r)      | ceramide (homo sapiens)                                    | Endoplasmic Reticulum |
| 2459 | 163r         | crn(r)         | L-Carnitine                                                | Endoplasmic Reticulum |
| 2460 | 11268r       | crtsl(r)       | Cortisol                                                   | Endoplasmic Reticulum |
| 2461 | 1737r        | crtstrn(r)     | Corticosterone                                             | Endoplasmic Reticulum |

| Row  | Metabolite # | Abbreviation             | Metabolite Name                                                                                                   | Compartment           |
|------|--------------|--------------------------|-------------------------------------------------------------------------------------------------------------------|-----------------------|
| 2462 | 18537r       | dag_hs(r)                | diacylglycerol (homo sapiens)                                                                                     | Endoplasmic Reticulum |
| 2463 | 3688r        | ddsmsterol(r)            | 7-Dehydrodesmosterol                                                                                              | Endoplasmic Reticulum |
| 2464 | 20042r       | dem2emgacpail_prot_hs(r) | deacylated-(phosphoethanolaminyldimannosyl),(phosphoethanolaminyl)-mannosyl-glucosaminyl-acylphosphatidylinositol | Endoplasmic Reticulum |
| 2465 | 20041r       | dgpi_prot_hs(r)          | deacylated-glycophosphatidylinositol (GPI)-anchored protein                                                       | Endoplasmic Reticulum |
| 2466 | 3997r        | dhcholestanate(r)        | 3alpha,7alpha-Dihydroxy-5beta-cholestanate                                                                        | Endoplasmic Reticulum |
| 2467 | 3322r        | dhcholestancoa(r)        | 3alpha,7alpha-Dihydroxy-5beta-cholestanoyl-CoA                                                                    | Endoplasmic Reticulum |
| 2468 | 3377r        | dhcholoylcoa(r)          | 3alpha,7alpha-Dihydroxy-5beta-cholest-24-enoyl-CoA                                                                | Endoplasmic Reticulum |
| 2469 | 956r         | dhea(r)                  | Dehydroepiandrosterone                                                                                            | Endoplasmic Reticulum |
| 2470 | 3998r        | dheas(r)                 | Dehydroepiandrosterone sulfate                                                                                    | Endoplasmic Reticulum |
| 2471 | 14990r       | doldp_L(r)               | Dolichol diphosphate, human liver homolog                                                                         | Endoplasmic Reticulum |
| 2472 | 14991r       | doldp_U(r)               | Dolichol diphosphate, human uterine homolog                                                                       | Endoplasmic Reticulum |
| 2473 | 14992r       | dolglcp_L(r)             | Dolichyl beta-D-glucosyl phosphate, human liver homolog                                                           | Endoplasmic Reticulum |
| 2474 | 14993r       | dolglcp_U(r)             | Dolichyl beta-D-glucosyl phosphate, human uterine homolog                                                         | Endoplasmic Reticulum |
| 2475 | 14986r       | dolichol_L(r)            | Dolichol, human liver homolog                                                                                     | Endoplasmic Reticulum |
| 2476 | 14987r       | dolichol_U(r)            | Dolichol, human uterine homolog                                                                                   | Endoplasmic Reticulum |
| 2477 | 14994r       | dolmanp_L(r)             | Dolichyl phosphate D-mannose, human liver homolog                                                                 | Endoplasmic Reticulum |
| 2478 | 14995r       | dolmanp_U(r)             | Dolichyl phosphate D-mannose, human uterine homolog                                                               | Endoplasmic Reticulum |
| 2479 | 14988r       | dolp_L(r)                | Dolichol phosphate, human liver homolog                                                                           | Endoplasmic Reticulum |
| 2480 | 14989r       | dolp_U(r)                | Dolichol phosphate, human uterine homolog                                                                         | Endoplasmic Reticulum |
| 2481 | 1463r        | dsmsterol(r)             | Desmosterol                                                                                                       | Endoplasmic Reticulum |
| 2482 | 3714r        | eandrstrn(r)             | epiandrosterone                                                                                                   | Endoplasmic Reticulum |
| 2483 | 20367r       | ebastine(r)              | ebastine                                                                                                          | Endoplasmic Reticulum |
| 2484 | 20368r       | ebastineoh(r)            | hydroxylated ebastine                                                                                             | Endoplasmic Reticulum |
| 2485 | 19820r       | ecgon(r)                 | ecgonine                                                                                                          | Endoplasmic Reticulum |
| 2486 | 19809r       | egme(r)                  | ecgonine methyl ester                                                                                             | Endoplasmic Reticulum |

| Row  | Metabolite # | Abbreviation            | Metabolite Name                                                                                                | Compartment           |
|------|--------------|-------------------------|----------------------------------------------------------------------------------------------------------------|-----------------------|
| 2487 | 19995r       | em2emgacpail_hs(r)      | (phosphoethanolaminyldimannosyl),(phosphoethanolaminyl)-mannosyl-glucosaminyl-acylphosphatidylinositol (H7)    | Endoplasmic Reticulum |
| 2488 | 20040r       | em2emgacpail_prot_hs(r) | (phosphoethanolaminyldimannosyl),(phosphoethanolaminyl)-mannosyl-glucosaminyl-acylphosphatidylinositol         | Endoplasmic Reticulum |
| 2489 | 19993r       | em3gacpail_hs(r)        | phosphoethanolaminyl-trimannosyl-glucosaminyl-acylphosphatidylinositol (H6')                                   | Endoplasmic Reticulum |
| 2490 | 19994r       | emem2gacpail_hs(r)      | (phosphoethanolaminyldimannosyl),(phosphoethanolaminyl)-dimannosyl-glucosaminyl-acylphosphatidylinositol (H7') | Endoplasmic Reticulum |
| 2491 | 19989r       | emgacpail_hs(r)         | phosphoethanolaminyldimannosyl-glycosylaminyl-acylphosphatidylinositol (H5)                                    | Endoplasmic Reticulum |
| 2492 | 706r         | estradiol(r)            | Estradiol                                                                                                      | Endoplasmic Reticulum |
| 2493 | 20817r       | estradiolglc(r)         | estradiol glucuronide                                                                                          | Endoplasmic Reticulum |
| 2494 | 3904r        | estriol(r)              | estriol                                                                                                        | Endoplasmic Reticulum |
| 2495 | 3415r        | estriolglc(r)           | 16-Glucuronide-estriol                                                                                         | Endoplasmic Reticulum |
| 2496 | 86r          | estrone(r)              | Estrone                                                                                                        | Endoplasmic Reticulum |
| 2497 | 20814r       | estroneglc(r)           | estrone glucuronide                                                                                            | Endoplasmic Reticulum |
| 2498 | 2601r        | estrones(r)             | Estrone 3-sulfate                                                                                              | Endoplasmic Reticulum |
| 2499 | 9020r        | ethamp(r)               | Ethanolamine phosphate                                                                                         | Endoplasmic Reticulum |
| 2500 | 478r         | fad(r)                  | Flavin adenine dinucleotide oxidized                                                                           | Endoplasmic Reticulum |
| 2501 | 42r          | fadh2(r)                | Flavin adenine dinucleotide reduced                                                                            | Endoplasmic Reticulum |
| 2502 | 334r         | for(r)                  | Formate                                                                                                        | Endoplasmic Reticulum |
| 2503 | 10388r       | frdp(r)                 | Farnesyl diphosphate                                                                                           | Endoplasmic Reticulum |
| 2504 | 15443r       | g1m6masnB1(r)           | glucosyl-(alpha-D-mannosyl)6-beta-D-mannosyl-diacetylchitobiosyl-L-asparagine (protein)                        | Endoplasmic Reticulum |
| 2505 | 15442r       | g1m7masnB(r)            | glucosyl-(alpha-D-mannosyl)7-beta-D-mannosyl-diacetylchitobiosyl-L-asparagine, isoform B (protein)             | Endoplasmic Reticulum |
| 2506 | 15441r       | g1m7masnC(r)            | glucosyl-(alpha-D-mannosyl)7-beta-D-mannosyl-diacetylchitobiosyl-L-asparagine, isoform C (protein)             | Endoplasmic Reticulum |
| 2507 | 15142r       | g1m8masn(r)             | (alpha-D-Glucosyl)-(alpha-D-mannosyl)8-beta-D-mannosyl-diacetylchitobiosyl-L-asparagine (protein)              | Endoplasmic Reticulum |
| 2508 | 15019r       | g1m8mpdol_L(r)          | alpha-D-Glucosyl-(alpha-D-mannosyl)8-beta-D-mannosyl-diacetylchitobiosyldiphosphodolichol, human liver homolog | Endoplasmic Reticulum |

| Row  | Metabolite # | Abbreviation   | Metabolite Name                                                                                                                | Compartment           |
|------|--------------|----------------|--------------------------------------------------------------------------------------------------------------------------------|-----------------------|
| 2509 | 15020r       | g1m8mpdol_U(r) | alpha-D-Glucosyl-(alpha-D-mannosyl)8-beta-D-mannosyl-diacetylchitobiosyldiphosphodolichol, human uterine homolog               | Endoplasmic Reticulum |
| 2510 | 15138r       | g2m8masn(r)    | (alpha-D-Glucosyl)2-(alpha-D-mannosyl)8-beta-D-mannosyl-diacetylchitobiosyl-L-asparagine (protein)                             | Endoplasmic Reticulum |
| 2511 | 15021r       | g2m8mpdol_L(r) | (alpha-D-Glucosyl)2-(alpha-D-mannosyl)8-beta-D-mannosyl-diacetylchitobiosyldiphosphodolichol, human liver homolog              | Endoplasmic Reticulum |
| 2512 | 15022r       | g2m8mpdol_U(r) | (alpha-D-Glucosyl)2-(alpha-D-mannosyl)8-beta-D-mannosyl-diacetylchitobiosyldiphosphodolichol, human uterine homolog            | Endoplasmic Reticulum |
| 2513 | 15115r       | g3m8masn(r)    | (alpha-D-Glucosyl)3-(alpha-D-mannosyl)8-beta-D-mannosyl-diacetylchitobiosyl-L-asparagine (protein)                             | Endoplasmic Reticulum |
| 2514 | 15023r       | g3m8mpdol_L(r) | (alpha-D-Glucosyl)3-(alpha-D-mannosyl)8-beta-D-mannosyl-diacetylchitobiosyldiphosphodolichol, human liver homolog              | Endoplasmic Reticulum |
| 2515 | 15024r       | g3m8mpdol_U(r) | (alpha-D-Glucosyl)3-(alpha-D-mannosyl)8-beta-D-mannosyl-diacetylchitobiosyldiphosphodolichol, human uterine homolog            | Endoplasmic Reticulum |
| 2516 | 765r         | g6p(r)         | D-Glucose 6-phosphate                                                                                                          | Endoplasmic Reticulum |
| 2517 | 19963r       | gacpail_hs(r)  | glucosaminyl-acylphosphatidylinositol                                                                                          | Endoplasmic Reticulum |
| 2518 | 18308r       | glac(r)        | D-glucurono-6,3-lactone                                                                                                        | Endoplasmic Reticulum |
| 2519 | 318r         | glc-D(r)       | D-Glucose                                                                                                                      | Endoplasmic Reticulum |
| 2520 | 256r         | glcur(r)       | D-Glucuronate                                                                                                                  | Endoplasmic Reticulum |
| 2521 | 313r         | glu-L(r)       | L-Glutamate                                                                                                                    | Endoplasmic Reticulum |
| 2522 | 19613r       | gluside_hs(r)  | glucocerebroside (homo sapiens)                                                                                                | Endoplasmic Reticulum |
| 2523 | 19996r       | gpi_hs(r)      | glycophosphatidylinositol (GPI) anchor precursor (3-(phosphoethanolaminy-mannosyl)-glucosaminyl-acylphosphatidylinositol) (H8) | Endoplasmic Reticulum |
| 2524 | 20035r       | gpi_prot_hs(r) | glycophosphatidylinositol (GPI)-anchored protein                                                                               | Endoplasmic Reticulum |
| 2525 | 20039r       | gpi_sig(r)     | glycophosphatidylinositol (GPI) signal sequence (C-terminal peptide)                                                           | Endoplasmic Reticulum |
| 2526 | 11388r       | gthrd(r)       | Reduced glutathione                                                                                                            | Endoplasmic Reticulum |
| 2527 | 677r         | gullac(r)      | L-Gulono-1,4-lactone                                                                                                           | Endoplasmic Reticulum |
| 2528 | 650r         | guln(r)        | L-Gulonate                                                                                                                     | Endoplasmic Reticulum |
| 2529 | 1049r        | h(r)           | H+                                                                                                                             | Endoplasmic Reticulum |
| 2530 | 317r         | h2o(r)         | H2O                                                                                                                            | Endoplasmic Reticulum |

| Row  | Metabolite # | Abbreviation             | Metabolite Name                                                                                 | Compartment           |
|------|--------------|--------------------------|-------------------------------------------------------------------------------------------------|-----------------------|
| 2531 | 297r         | hdca(r)                  | Hexadecanoate (n-C16:0)                                                                         | Endoplasmic Reticulum |
| 2532 | 17864r       | hemeBo(r)                | Heme B oxidized                                                                                 | Endoplasmic Reticulum |
| 2533 | 17865r       | hemeBr(r)                | Heme B reduced                                                                                  | Endoplasmic Reticulum |
| 2534 | 20384r       | hestratriol(r)           | 4,17 dihydroxy estradiol                                                                        | Endoplasmic Reticulum |
| 2535 | 191r         | hmgcoa(r)                | Hydroxymethylglutaryl-CoA                                                                       | Endoplasmic Reticulum |
| 2536 | 399r         | hxdcal(r)                | Hexadecanal                                                                                     | Endoplasmic Reticulum |
| 2537 | 597r         | lanost(r)                | Lanosterol                                                                                      | Endoplasmic Reticulum |
| 2538 | 755r         | leuktrA4(r)              | Leukotriene A4                                                                                  | Endoplasmic Reticulum |
| 2539 | 1752r        | leuktrB4(r)              | Leukotriene B4                                                                                  | Endoplasmic Reticulum |
| 2540 | 26340r       | leuktrB4wcooh(r)         | w-carboxy leukotriene B4                                                                        | Endoplasmic Reticulum |
| 2541 | 20365r       | leuktrB4woh(r)           | w-hydroxyl leukotriene B4                                                                       | Endoplasmic Reticulum |
| 2542 | 17887r       | leuktrC4(r)              | Leukotriene C4                                                                                  | Endoplasmic Reticulum |
| 2543 | 4410r        | leuktrD4(r)              | Leukotriene D4                                                                                  | Endoplasmic Reticulum |
| 2544 | 780r         | lthstrl(r)               | 5alpha-Cholest-7-en-3beta-ol                                                                    | Endoplasmic Reticulum |
| 2545 | 20047r       | m(em)3gacpail_hs(r)      | mannosyl-3-(phosphoethanolaminy)-glucosaminyl-acylphosphatidylinositol (M4A)                    | Endoplasmic Reticulum |
| 2546 | 20052r       | m(em)3gacpail_prot_hs(r) | mannosyl-3-(phosphoethanolaminy)-glucosaminyl-acylphosphatidylinositol-Protein (M4A)            | Endoplasmic Reticulum |
| 2547 | 19991r       | m2emgacpail_hs(r)        | (dimannosyl),(phosphoethanolaminy)-mannosyl-glucosylaminy-acylphosphatidylinositol (H6)         | Endoplasmic Reticulum |
| 2548 | 19968r       | m2gacpail_hs(r)          | dimannosyl-glucosaminyl-acylphosphatidylinositol (H3)                                           | Endoplasmic Reticulum |
| 2549 | 20045r       | m3emgacpail_hs(r)        | (trimannosyl),(phosphoethanolaminy)-mannosyl-glucosaminyl-acylphosphatidylinositol (M4C)        | Endoplasmic Reticulum |
| 2550 | 19992r       | m3gacpail_hs(r)          | trimannosyl-glucosaminyl-acylphosphatidylinositol (H4)                                          | Endoplasmic Reticulum |
| 2551 | 15008r       | m4mpdol_L(r)             | (alpha-D-Mannosyl)4-beta-D-mannosyl-diacetylchitobiosyldiphosphodolichol, human liver homolog   | Endoplasmic Reticulum |
| 2552 | 15009r       | m4mpdol_U(r)             | (alpha-D-Mannosyl)4-beta-D-mannosyl-diacetylchitobiosyldiphosphodolichol, human uterine homolog | Endoplasmic Reticulum |
| 2553 | 15010r       | m5mpdol_L(r)             | (alpha-D-Mannosyl)5-beta-D-mannosyl-diacetylchitobiosyldiphosphodolichol, human liver homolog   | Endoplasmic Reticulum |
| 2554 | 15011r       | m5mpdol_U(r)             | (alpha-D-Mannosyl)5-beta-D-mannosyl-diacetylchitobiosyldiphosphodolichol, human uterine homolog | Endoplasmic Reticulum |

| Row  | Metabolite # | Abbreviation             | Metabolite Name                                                                                                                    | Compartment           |
|------|--------------|--------------------------|------------------------------------------------------------------------------------------------------------------------------------|-----------------------|
| 2555 | 15012r       | m6mpdol_L(r)             | (alpha-D-Mannosyl)6-beta-D-mannosyl-diacetylchitobiosyldiphosphodolichol, human liver homolog                                      | Endoplasmic Reticulum |
| 2556 | 15013r       | m6mpdol_U(r)             | (alpha-D-Mannosyl)6-beta-D-mannosyl-diacetylchitobiosyldiphosphodolichol, human uterine homolog                                    | Endoplasmic Reticulum |
| 2557 | 15159r       | m7masnB(r)               | (alpha-D-mannosyl)7-beta-D-mannosyl-diacetylchitobiosyl-L-asparagine, isoform B (protein)                                          | Endoplasmic Reticulum |
| 2558 | 15014r       | m7mpdol_L(r)             | (alpha-D-Mannosyl)7-beta-D-mannosyl-diacetylchitobiosyldiphosphodolichol, human liver homolog                                      | Endoplasmic Reticulum |
| 2559 | 15016r       | m7mpdol_U(r)             | (alpha-D-Mannosyl)7-beta-D-mannosyl-diacetylchitobiosyldiphosphodolichol, human uterine homolog                                    | Endoplasmic Reticulum |
| 2560 | 15144r       | m8masn(r)                | (alpha-D-mannosyl)8-beta-D-mannosyl-diacetylchitobiosyl-L-asparagine (protein)                                                     | Endoplasmic Reticulum |
| 2561 | 15017r       | m8mpdol_L(r)             | (alpha-D-Mannosyl)8-beta-D-mannosyl-diacetylchitobiosyldiphosphodolichol, human liver homolog                                      | Endoplasmic Reticulum |
| 2562 | 15018r       | m8mpdol_U(r)             | (alpha-D-Mannosyl)8-beta-D-mannosyl-diacetylchitobiosyldiphosphodolichol, human uterine homolog                                    | Endoplasmic Reticulum |
| 2563 | 11018r       | man(r)                   | D-Mannose                                                                                                                          | Endoplasmic Reticulum |
| 2564 | 20046r       | mem2emgacpail_hs(r)      | ({(mannosyl),(phosphoethanolaminy)}-dimannosyl},{phosphoethanolaminy})-mannosyl-glucosaminy-acylphosphatidylinositol (M4B)         | Endoplasmic Reticulum |
| 2565 | 20051r       | mem2emgacpail_prot_hs(r) | ({(mannosyl),(phosphoethanolaminy)}-dimannosyl},{phosphoethanolaminy})-mannosyl-glucosaminy-acylphosphatidylinositol-Protein (M4B) | Endoplasmic Reticulum |
| 2566 | 19990r       | memgacpail_hs(r)         | (mannosyl),(phosphoethanolaminy)-mannosyl-glucosylaminy-acylphosphatidylinositol (B)                                               | Endoplasmic Reticulum |
| 2567 | 1092r        | meoh(r)                  | Methanol                                                                                                                           | Endoplasmic Reticulum |
| 2568 | 418r         | mev-R(r)                 | (R)-Mevalonate                                                                                                                     | Endoplasmic Reticulum |
| 2569 | 19966r       | mgacpail_hs(r)           | mannosyl-glucosaminy-acylphosphatidylinositol (H2)                                                                                 | Endoplasmic Reticulum |
| 2570 | 466r         | nad(r)                   | Nicotinamide adenine dinucleotide                                                                                                  | Endoplasmic Reticulum |
| 2571 | 467r         | nadh(r)                  | Nicotinamide adenine dinucleotide - reduced                                                                                        | Endoplasmic Reticulum |
| 2572 | 469r         | nadp(r)                  | Nicotinamide adenine dinucleotide phosphate                                                                                        | Endoplasmic Reticulum |
| 2573 | 468r         | nadph(r)                 | Nicotinamide adenine dinucleotide phosphate - reduced                                                                              | Endoplasmic Reticulum |
| 2574 | 476r         | nh4(r)                   | Ammonium                                                                                                                           | Endoplasmic Reticulum |
| 2575 | 470r         | o2(r)                    | O2                                                                                                                                 | Endoplasmic Reticulum |

| Row  | Metabolite # | Abbreviation  | Metabolite Name                                            | Compartment           |
|------|--------------|---------------|------------------------------------------------------------|-----------------------|
| 2576 | 18536r       | pa_hs(r)      | phosphatidic acid (homo sapiens)                           | Endoplasmic Reticulum |
| 2577 | 19605r       | pail34p_hs(r) | phosphatidylinositol-3,4-bisphosphate (Homo sapiens)       | Endoplasmic Reticulum |
| 2578 | 19704r       | pail35p_hs(r) | phosphatidylinositol-3,5-bisphosphate (Homo sapiens)       | Endoplasmic Reticulum |
| 2579 | 3992r        | pail3p_hs(r)  | 1-Phosphatidyl-1D-myo-inositol 3-phosphate (Homo sapiens)  | Endoplasmic Reticulum |
| 2580 | 19332r       | pail4p_hs(r)  | 1-Phosphatidyl-1D-myo-inositol 4-phosphate (Homo sapiens)  | Endoplasmic Reticulum |
| 2581 | 19479r       | pail5p_hs(r)  | 1-Phosphatidyl-1D-myo-inositol 5-phosphate (Homo sapiens)  | Endoplasmic Reticulum |
| 2582 | 19327r       | pail_hs(r)    | phosphatidylinositol (homo sapiens)                        | Endoplasmic Reticulum |
| 2583 | 19051r       | pchol_hs(r)   | Phosphatidylcholine (homo sapiens)                         | Endoplasmic Reticulum |
| 2584 | 19050r       | pe_hs(r)      | phosphatidylethanolamine (homo sapiens)                    | Endoplasmic Reticulum |
| 2585 | 19967r       | pecgon(r)     | pseudoecgonine                                             | Endoplasmic Reticulum |
| 2586 | 19969r       | pecgoncoa(r)  | Pseudoecgonyl-CoA                                          | Endoplasmic Reticulum |
| 2587 | 22613r       | pepslys(r)    | peptide sans lysine                                        | Endoplasmic Reticulum |
| 2588 | 472r         | pi(r)         | Phosphate                                                  | Endoplasmic Reticulum |
| 2589 | 475r         | ppi(r)        | Diphosphate                                                | Endoplasmic Reticulum |
| 2590 | 20038r       | pre_prot(r)   | glycophosphatidylinositol (GPI)-anchored protein precursor | Endoplasmic Reticulum |
| 2591 | 10681r       | prgnlone(r)   | Pregnenolone                                               | Endoplasmic Reticulum |
| 2592 | 26331r       | prgnlones(r)  | pregnenolone sulfate                                       | Endoplasmic Reticulum |
| 2593 | 10510r       | prgstrn(r)    | Progesterone                                               | Endoplasmic Reticulum |
| 2594 | 229r         | pro-L(r)      | L-Proline                                                  | Endoplasmic Reticulum |
| 2595 | 11382r       | prostgd2(r)   | Prostaglandin D2                                           | Endoplasmic Reticulum |
| 2596 | 398r         | prostge2(r)   | Prostaglandin E2                                           | Endoplasmic Reticulum |
| 2597 | 422r         | prostgh2(r)   | Prostaglandin H2                                           | Endoplasmic Reticulum |
| 2598 | 856r         | prostgi2(r)   | Prostaglandin I2                                           | Endoplasmic Reticulum |
| 2599 | 19052r       | ps_hs(r)      | phosphatidylserine (homo sapiens)                          | Endoplasmic Reticulum |
| 2600 | 11153r       | retn(r)       | Retinoate                                                  | Endoplasmic Reticulum |
| 2601 | 20818r       | retnqlc(r)    | retinoyl glucuronide                                       | Endoplasmic Reticulum |

| Row  | Metabolite # | Abbreviation    | Metabolite Name                                      | Compartment           |
|------|--------------|-----------------|------------------------------------------------------|-----------------------|
| 2602 | 261r         | ru5p-D(r)       | D-Ribulose 5-phosphate                               | Endoplasmic Reticulum |
| 2603 | 335r         | so4(r)          | Sulfate                                              | Endoplasmic Reticulum |
| 2604 | 9025r        | sph1p(r)        | Sphinganine 1-phosphate                              | Endoplasmic Reticulum |
| 2605 | 708r         | sphgn(r)        | Sphinganine                                          | Endoplasmic Reticulum |
| 2606 | 10703r       | sphings(r)      | Sphingosine                                          | Endoplasmic Reticulum |
| 2607 | 4541r        | sphs1p(r)       | Sphingosine 1-phosphate                              | Endoplasmic Reticulum |
| 2608 | 519r         | sql(r)          | Squalene                                             | Endoplasmic Reticulum |
| 2609 | 325r         | succ(r)         | Succinate                                            | Endoplasmic Reticulum |
| 2610 | 3477r        | thcholstoic(r)  | 3alpha,7alpha,12alpha-Trihydroxy-5beta-cholestanoate | Endoplasmic Reticulum |
| 2611 | 2907r        | tmlys(r)        | N6,N6,N6-Trimethyl-L-lysine                          | Endoplasmic Reticulum |
| 2612 | 10622r       | ttsterone(r)    | Testosterone                                         | Endoplasmic Reticulum |
| 2613 | 20816r       | ttsteroneglc(r) | testosterone glucuronide                             | Endoplasmic Reticulum |
| 2614 | 1777r        | txa2(r)         | Thromboxane A2                                       | Endoplasmic Reticulum |
| 2615 | 477r         | udp(r)          | UDP                                                  | Endoplasmic Reticulum |
| 2616 | 10912r       | udpacgal(r)     | UDP-N-acetyl-D-galactosamine                         | Endoplasmic Reticulum |
| 2617 | 316r         | udpg(r)         | UDPglucose                                           | Endoplasmic Reticulum |
| 2618 | 241r         | udpglcur(r)     | UDP-D-glucuronate                                    | Endoplasmic Reticulum |
| 2619 | 255r         | udpxyl(r)       | UDP-D-xylose                                         | Endoplasmic Reticulum |
| 2620 | 1068r        | ump(r)          | UMP                                                  | Endoplasmic Reticulum |
| 2621 | 20366r       | wharachd(r)     | w-hydroxyl arachidonic acid                          | Endoplasmic Reticulum |
| 2622 | 20403r       | whtsterone(r)   | w hydroxy testosterone                               | Endoplasmic Reticulum |
| 2623 | 17046r       | xol24oh(r)      | 24-Hydroxycholesterol                                | Endoplasmic Reticulum |
| 2624 | 17047r       | xol25oh(r)      | 25-Hydroxycholesterol                                | Endoplasmic Reticulum |
| 2625 | 4060r        | xol27oh(r)      | 27-Hydroxycholesterol                                | Endoplasmic Reticulum |
| 2626 | 11131r       | xol7a(r)        | 7 alpha-Hydroxycholesterol                           | Endoplasmic Reticulum |
| 2627 | 3381r        | xol7ah2(r)      | 3alpha,7alpha-Dihydroxy-5beta-cholestane             | Endoplasmic Reticulum |



| Row  | Metabolite # | Abbreviation  | Metabolite Name                                   | Compartment           |
|------|--------------|---------------|---------------------------------------------------|-----------------------|
| 2628 | 11535r       | xol7aone(r)   | 7alpha-Hydroxycholest-4-en-3-one                  | Endoplasmic Reticulum |
| 2629 | 3384r        | xoldiolone(r) | 7alpha,12alpha-Dihydroxycholest-4-en-3-one        | Endoplasmic Reticulum |
| 2630 | 2593r        | xolest_hs(r)  | cholesterol ester                                 | Endoplasmic Reticulum |
| 2631 | 17068r       | xoltri24(r)   | 7-alpha,24(S)-Dihydroxycholesterol                | Endoplasmic Reticulum |
| 2632 | 17067r       | xoltri25(r)   | 7-alpha,25-Dihydroxycholesterol                   | Endoplasmic Reticulum |
| 2633 | 4061r        | xoltri27(r)   | 7-alpha,27-Dihydroxycholesterol                   | Endoplasmic Reticulum |
| 2634 | 3383r        | xoltriol(r)   | 3alpha,7alpha,12alpha-Trihydroxy-5beta-cholestane | Endoplasmic Reticulum |
| 2635 | 20363r       | xser(r)       | Xyl-L-Ser (protein)                               | Endoplasmic Reticulum |
| 2636 | 9132r        | zym_int2(r)   | zymosterol intermediate 2                         | Endoplasmic Reticulum |
| 2637 | 3367r        | zymst(r)      | zymosterol                                        | Endoplasmic Reticulum |
| 2638 | 10801r       | zymstnl(r)    | Zymostenol                                        | Endoplasmic Reticulum |
| 2639 | 11156x       | 1p2cbxl(x)    | 1-Pyrroline-2-carboxylate                         | Peroxisome            |
| 2640 | 3121x        | 1pipdn2c(x)   | delta1-Piperideine-2-carboxylate                  | Peroxisome            |
| 2641 | 19703x       | 3h26dm5coa(x) | 3-Hydroxy-2,6-dimethyl-5-methylene-heptanoyl-CoA  | Peroxisome            |
| 2642 | 905x         | 3hbcoa(x)     | (S)-3-Hydroxybutanoyl-CoA                         | Peroxisome            |
| 2643 | 4184x        | 3hpcoa(x)     | 3-Hydroxypropionyl-CoA                            | Peroxisome            |
| 2644 | 3794x        | 3odcoa(x)     | 3-Oxodecanoyl-CoA                                 | Peroxisome            |
| 2645 | 3792x        | 3oddcoa(x)    | 3-Oxododecanoyl-CoA                               | Peroxisome            |
| 2646 | 3788x        | 3ohdcoa(x)    | 3-Oxohexadecanoyl-CoA                             | Peroxisome            |
| 2647 | 8402x        | 3ohodcoa(x)   | 3-Oxoctadecanoyl-CoA                              | Peroxisome            |
| 2648 | 9236x        | 3ohxcoa(x)    | 3-Oxohexacosyl-CoA                                | Peroxisome            |
| 2649 | 3790x        | 3otdcoa(x)    | 3-Oxotetradecanoyl-CoA                            | Peroxisome            |
| 2650 | 10559x       | 5a2opntn(x)   | 5-Amino-2-oxopentanoate                           | Peroxisome            |
| 2651 | 10525x       | 5dpmev(x)     | (R)-5-Diphosphomevalonate                         | Peroxisome            |
| 2652 | 2892x        | 5g2oxpt(x)    | 5-Guanidino-2-oxopentanoate                       | Peroxisome            |
| 2653 | 883x         | 5pmev(x)      | (R)-5-Phosphomevalonate                           | Peroxisome            |
| 2654 | 2428x        | 6a2ohxnt(x)   | 6-Amino-2-oxohexanoate                            | Peroxisome            |
| 2655 | 411x         | Lpipecol(x)   | L-Pipecolate                                      | Peroxisome            |
| 2656 | 18523x       | Rtotal(x)     | R total                                           | Peroxisome            |
| 2657 | 22165x       | Rtotalcoa(x)  | R total Coenzyme A                                | Peroxisome            |
| 2658 | 174x         | aacoa(x)      | Acetoacetyl-CoA                                   | Peroxisome            |
| 2659 | 9016x        | acac(x)       | Acetoacetate                                      | Peroxisome            |
| 2660 | 1052x        | acald(x)      | Acetaldehyde                                      | Peroxisome            |
| 2661 | 11537x       | accoa(x)      | Acetyl-CoA                                        | Peroxisome            |
| 2662 | 7471x        | acrn(x)       | O-Acetylcarnitine                                 | Peroxisome            |
| 2663 | 18534x       | adhap_hs(x)   | acyl-dihydroxyacetone phosphate                   | Peroxisome            |
| 2664 | 471x         | adp(x)        | ADP                                               | Peroxisome            |
| 2665 | 18463x       | adrn(x)       | adrenic acid                                      | Peroxisome            |
| 2666 | 18484x       | adrncoa(x)    | adrenyl coenzyme A                                | Peroxisome            |
| 2667 | 19357x       | akdhap_hs(x)  | 1-alkyldihydroxyacetone phosphate                 | Peroxisome            |
| 2668 | 314x         | akg(x)        | 2-Oxoglutarate                                    | Peroxisome            |

| Row  | Metabolite # | Abbreviation      | Metabolite Name                                               | Compartment |
|------|--------------|-------------------|---------------------------------------------------------------|-------------|
| 2669 | 1093x        | ala-D(x)          | D-Alanine                                                     | Peroxisome  |
| 2670 | 11412x       | ala-L(x)          | L-Alanine                                                     | Peroxisome  |
| 2671 | 19356x       | alkylR1oh(x)      | hydroxy alkyl chain                                           | Peroxisome  |
| 2672 | 309x         | amp(x)            | AMP                                                           | Peroxisome  |
| 2673 | 18483x       | arachcoa(x)       | arachidyl coenzyme A                                          | Peroxisome  |
| 2674 | 11887x       | arachdcoa(x)      | C20:4-CoA                                                     | Peroxisome  |
| 2675 | 644x         | arg-D(x)          | D-Arginine                                                    | Peroxisome  |
| 2676 | 10519x       | asp-D(x)          | D-Aspartate                                                   | Peroxisome  |
| 2677 | 465x         | atp(x)            | ATP                                                           | Peroxisome  |
| 2678 | 733x         | b2coa(x)          | Crotonoyl-CoA                                                 | Peroxisome  |
| 2679 | 11888x       | c226coa(x)        | cervonyl coenzyme A                                           | Peroxisome  |
| 2680 | 19701x       | c2m26dcoa(x)      | cis-2-Methyl-5-isopropylhexa-2,5-dienoyl-CoA                  | Peroxisome  |
| 2681 | 10881x       | cholcoa(x)        | Choloyl-CoA                                                   | Peroxisome  |
| 2682 | 3386x        | cholcoads(x)      | 3alpha,7alpha,12alpha-Trihydroxy-5beta-cholest-24-enoyl-CoA   | Peroxisome  |
| 2683 | 3391x        | cholcoaone(x)     | 3alpha,7alpha,12alpha-Trihydroxy-5beta-24-oxocholestanoyl-CoA | Peroxisome  |
| 2684 | 3507x        | cholcoar(x)       | 3alpha,7alpha,12alpha-Trihydroxy-5beta-cholestanoyl-CoA       | Peroxisome  |
| 2685 | 17159x       | cholcoas(x)       | 3alpha,7alpha,12alpha-Trihydroxy-5beta-cholestanoyl-CoA(S)    | Peroxisome  |
| 2686 | 18488x       | clpndcoa(x)       | clupanodonyl CoA                                              | Peroxisome  |
| 2687 | 474x         | co2(x)            | CO2                                                           | Peroxisome  |
| 2688 | 473x         | coa(x)            | Coenzyme A                                                    | Peroxisome  |
| 2689 | 163x         | crn(x)            | L-Carnitine                                                   | Peroxisome  |
| 2690 | 3803x        | dcacoa(x)         | Decanoyl-CoA (n-C10:0CoA)                                     | Peroxisome  |
| 2691 | 3848x        | dcholcoa(x)       | chenodeoxycholoyl coenzyme a                                  | Peroxisome  |
| 2692 | 18487x       | dcsptn1coa(x)     | docosa-4,7,10,13,16-pentaenoyl coenzyme A                     | Peroxisome  |
| 2693 | 1383x        | ddcacoa(x)        | Dodecanoyl-CoA (n-C12:0CoA)                                   | Peroxisome  |
| 2694 | 3387x        | dgchol(x)         | Chenodeoxyglycocholate                                        | Peroxisome  |
| 2695 | 11531x       | dgcholcoa(x)      | Chenodeoxyglycocholoyl-CoA                                    | Peroxisome  |
| 2696 | 1072x        | dhap(x)           | Dihydroxyacetone phosphate                                    | Peroxisome  |
| 2697 | 3997x        | dhcholestanate(x) | 3alpha,7alpha-Dihydroxy-5beta-cholestanate                    | Peroxisome  |
| 2698 | 3322x        | dhcholestancoa(x) | 3alpha,7alpha-Dihydroxy-5beta-cholestanoyl-CoA                | Peroxisome  |
| 2699 | 3377x        | dhcholoylcoa(x)   | 3alpha,7alpha-Dihydroxy-5beta-cholest-24-enoyl-CoA            | Peroxisome  |
| 2700 | 3376x        | dhocholoylcoa(x)  | 3alpha,7alpha,12alpha,26-Tetrahydroxy-5beta-cholestane        | Peroxisome  |
| 2701 | 21959x       | dmnoncoa(x)       | 4,8 dimethylnonanoyl-CoA                                      | Peroxisome  |
| 2702 | 21976x       | dmnoncrn(x)       | 4,8 dimethylnonanoyl carnitine                                | Peroxisome  |
| 2703 | 38x          | dmpp(x)           | Dimethylallyl diphosphate                                     | Peroxisome  |
| 2704 | 87x          | etoh(x)           | Ethanol                                                       | Peroxisome  |
| 2705 | 478x         | fad(x)            | Flavin adenine dinucleotide oxidized                          | Peroxisome  |
| 2706 | 42x          | fadh2(x)          | Flavin adenine dinucleotide reduced                           | Peroxisome  |
| 2707 | 340x         | fald(x)           | Formaldehyde                                                  | Peroxisome  |
| 2708 | 11122x       | formcoa(x)        | Formyl-CoA                                                    | Peroxisome  |
| 2709 | 10388x       | frdp(x)           | Farnesyl diphosphate                                          | Peroxisome  |
| 2710 | 1554x        | gchola(x)         | glycocholate                                                  | Peroxisome  |
| 2711 | 11524x       | gdchola(x)        | glycochenodeoxycholate                                        | Peroxisome  |
| 2712 | 329x         | glx(x)            | Glyoxylate                                                    | Peroxisome  |
| 2713 | 323x         | gly(x)            | Glycine                                                       | Peroxisome  |
| 2714 | 237x         | glyclt(x)         | Glycolate                                                     | Peroxisome  |

| Row  | Metabolite # | Abbreviation  | Metabolite Name                                       | Compartment |
|------|--------------|---------------|-------------------------------------------------------|-------------|
| 2715 | 179x         | grdp(x)       | Geranyl diphosphate                                   | Peroxisome  |
| 2716 | 1049x        | h(x)          | H+                                                    | Peroxisome  |
| 2717 | 317x         | h2o(x)        | H2O                                                   | Peroxisome  |
| 2718 | 315x         | h2o2(x)       | Hydrogen peroxide                                     | Peroxisome  |
| 2719 | 297x         | hdca(x)       | Hexadecanoate (n-C16:0)                               | Peroxisome  |
| 2720 | 3801x        | hdd2coa(x)    | trans-Hexadec-2-enoyl-CoA                             | Peroxisome  |
| 2721 | 11013x       | hexccoa(x)    | Hexacosanoyl-CoA (n-C26:0CoA)                         | Peroxisome  |
| 2722 | 191x         | hmgcoa(x)     | Hydroxymethylglutaryl-CoA                             | Peroxisome  |
| 2723 | 242x         | hpyr(x)       | Hydroxypyruvate                                       | Peroxisome  |
| 2724 | 218x         | hxan(x)       | Hypoxanthine                                          | Peroxisome  |
| 2725 | 158x         | icit(x)       | Isocitrate                                            | Peroxisome  |
| 2726 | 1089x        | ipdp(x)       | Isopentenyl diphosphate                               | Peroxisome  |
| 2727 | 18490x       | lgnccoa(x)    | lignocericyl coenzyme A                               | Peroxisome  |
| 2728 | 2277x        | lnlncgcoa(x)  | gamma-linolenoyl-CoA                                  | Peroxisome  |
| 2729 | 328x         | lys-L(x)      | L-Lysine                                              | Peroxisome  |
| 2730 | 11267x       | malcoa(x)     | Malonyl-CoA                                           | Peroxisome  |
| 2731 | 418x         | mev-R(x)      | (R)-Mevalonate                                        | Peroxisome  |
| 2732 | 451x         | mmcoa-S(x)    | (S)-Methylmalonyl-CoA                                 | Peroxisome  |
| 2733 | 1023x        | na1(x)        | Sodium                                                | Peroxisome  |
| 2734 | 466x         | nad(x)        | Nicotinamide adenine dinucleotide                     | Peroxisome  |
| 2735 | 467x         | nadh(x)       | Nicotinamide adenine dinucleotide - reduced           | Peroxisome  |
| 2736 | 469x         | nadp(x)       | Nicotinamide adenine dinucleotide phosphate           | Peroxisome  |
| 2737 | 468x         | nadph(x)      | Nicotinamide adenine dinucleotide phosphate - reduced | Peroxisome  |
| 2738 | 476x         | nh4(x)        | Ammonium                                              | Peroxisome  |
| 2739 | 18485x       | nrvnccoa(x)   | nervonyl coenzyme A                                   | Peroxisome  |
| 2740 | 470x         | o2(x)         | O2                                                    | Peroxisome  |
| 2741 | 461x         | o2s(x)        | Superoxide anion                                      | Peroxisome  |
| 2742 | 322x         | oaa(x)        | Oxaloacetate                                          | Peroxisome  |
| 2743 | 10688x       | occoa(x)      | Octanoyl-CoA (n-C8:0CoA)                              | Peroxisome  |
| 2744 | 8782x        | odecoa(x)     | Octadecenoyl-CoA (n-C18:1CoA)                         | Peroxisome  |
| 2745 | 19415x       | orn-D(x)      | D-Ornithine                                           | Peroxisome  |
| 2746 | 10901x       | oxa(x)        | Oxalate                                               | Peroxisome  |
| 2747 | 15675x       | pcrn(x)       | propionyl-carnitine                                   | Peroxisome  |
| 2748 | 1308x        | phyt(x)       | phytanic acid                                         | Peroxisome  |
| 2749 | 21956x       | phyt2ohcoa(x) | 2-Hydroxyphytanoyl-CoA                                | Peroxisome  |
| 2750 | 21953x       | phytcoa(x)    | phytanyl coa                                          | Peroxisome  |
| 2751 | 472x         | pi(x)         | Phosphate                                             | Peroxisome  |
| 2752 | 11029x       | pmtcoa(x)     | Palmitoyl-CoA (n-C16:0CoA)                            | Peroxisome  |
| 2753 | 1064x        | ppcoa(x)      | Propanoyl-CoA                                         | Peroxisome  |
| 2754 | 475x         | ppi(x)        | Diphosphate                                           | Peroxisome  |
| 2755 | 21954x       | prist(x)      | pristanic acid                                        | Peroxisome  |
| 2756 | 21957x       | pristanal(x)  | pristanal                                             | Peroxisome  |
| 2757 | 21955x       | pristcoa(x)   | pristanoyl coa                                        | Peroxisome  |
| 2758 | 629x         | pro-D(x)      | D-Proline                                             | Peroxisome  |
| 2759 | 744x         | prpncoa(x)    | Propenoyl-CoA                                         | Peroxisome  |
| 2760 | 311x         | pyr(x)        | Pyruvate                                              | Peroxisome  |
| 2761 | 271x         | sarcs(x)      | Sarcosine                                             | Peroxisome  |
| 2762 | 339x         | ser-L(x)      | L-Serine                                              | Peroxisome  |
| 2763 | 8781x        | stcoa(x)      | Stearoyl-CoA (n-C18:0CoA)                             | Peroxisome  |
| 2764 | 18492x       | strdnccoa(x)  | stearidonyl coenzyme A                                | Peroxisome  |
| 2765 | 325x         | succ(x)       | Succinate                                             | Peroxisome  |
| 2766 | 19702x       | t2m26dcoa(x)  | trans-2-Methyl-5-isopropylhexa-2,5-dienoyl-CoA        | Peroxisome  |

| Row  | Metabolite # | Abbreviation    | Metabolite Name                                      | Compartment |
|------|--------------|-----------------|------------------------------------------------------|-------------|
| 2767 | 293x         | taur(x)         | Taurine                                              | Peroxisome  |
| 2768 | 3700x        | tchola(x)       | taurocholic acid                                     | Peroxisome  |
| 2769 | 3390x        | tdchola(x)      | taurochenodeoxycholate                               | Peroxisome  |
| 2770 | 1862x        | tdcoa(x)        | Tetradecanoyl-CoA (n-C14:0CoA)                       | Peroxisome  |
| 2771 | 18515x       | tethex3coa(x)   | tetracosahexaenoyl coenzyme A                        | Peroxisome  |
| 2772 | 18513x       | tetpent3coa(x)  | tetracosapentaenoyl coenzyme A, n-3                  | Peroxisome  |
| 2773 | 18509x       | tetpent6coa(x)  | tetracosapentaenoyl coenzyme A, n-6                  | Peroxisome  |
| 2774 | 18511x       | tettet6coa(x)   | tetracosatetraenoyl coenzyme A                       | Peroxisome  |
| 2775 | 3378x        | thcholoylcoa(x) | 3alpha,7alpha,24-Trihydroxy-5beta-cholestanoyl-CoA   | Peroxisome  |
| 2776 | 3477x        | thcholstoic(x)  | 3alpha,7alpha,12alpha-Trihydroxy-5beta-cholestanoate | Peroxisome  |
| 2777 | 75x          | thp2c(x)        | 2,3,4,5-Tetrahydropyridine-2-carboxylate             | Peroxisome  |
| 2778 | 18486x       | tmndncco(x)     | timnodonyl coenzyme A                                | Peroxisome  |
| 2779 | 8904x        | ttcoa(x)        | tetracosanoyl-CoA (n-C24:0CoA)                       | Peroxisome  |
| 2780 | 199x         | urate(x)        | Urate                                                | Peroxisome  |
| 2781 | 216x         | xan(x)          | Xanthine                                             | Peroxisome  |
