# Supplementary material
Source: PubMed Central journal article supplement (PMC1794290)
Supplement: pnas_0610772104_9.pdf [file pnas_0610772104_9.pdf]

**Table 4: Columns of the stoichiometric matrix (reactions).** Ordered list of reactions in the stoichiometric matrix used in the debugging simulations (SI Table 2). Reaction # is a nonredundant identifier used to denote each reaction.

| Column | Reaction # | Abbreviation             | Reaction Name                                                     |
|--------|------------|--------------------------|-------------------------------------------------------------------|
| 1      | 19551      | DM_13-cis-oretn(n)       | 13-cis-oxo-retinoic acid demand                                   |
| 2      | 19552      | DM_13-cis-retn(n)        | 13-cis-retinoate demand                                           |
| 3      | 14122      | DM_3aib(c)               | DM_3aib(c)                                                        |
| 4      | 20466      | DM_Asn-X-Ser/Thr(ly)     | DM_Asn-X-Ser/Thr(ly)                                              |
| 5      | 15019      | DM_LINKDEGly             | demand reaction for lysosomal degradation of proteoglycan linkage |
| 6      | 20471      | DM_Ser-Gly/Ala-X-Gly(ly) | DM_Ser-Gly/Ala-X-Gly(ly)                                          |
| 7      | 20470      | DM_Ser/Thr(ly)           | DM_Ser/Thr(ly)                                                    |
| 8      | 13303      | DM_accoa/nadh/co2        | pyruvate decarboxylation                                          |
| 9      | 13304      | DM_accoa/nadh/co2(m)     | pyruvate decarboxylation                                          |
| 10     | 14117      | DM_ala-B(c)              | DM_ala-B(c)                                                       |
| 11     | 2318       | DM_amp                   | DM_amp                                                            |
| 12     | 1012       | DM_atp(c)                | atp demand                                                        |
| 13     | 4317       | DM_atp2(c)               | atp demand                                                        |
| 14     | 20250      | DM_avite1(c)             | alpha-Tocopherol demand                                           |
| 15     | 20251      | DM_avite2(c)             | alpha-Tocotrienol demand                                          |
| 16     | 20252      | DM_bvite(c)              | beta-tocopherol demand                                            |
| 17     | 923        | DM_coa(c)                | Coenzyme A demand                                                 |
| 18     | 14811      | DM_dag_hs                | dag_hs demand                                                     |
| 19     | 19371      | DM_datp(m)               | dATP demand                                                       |
| 20     | 14129      | DM_datp(n)               | DM_datp(n)                                                        |
| 21     | 19372      | DM_dctp(m)               | dCTP demand                                                       |
| 22     | 14128      | DM_dctp(n)               | DM_dctp(n)                                                        |
| 23     | 14152      | DM_dgtp(m)               | DM_dgtp(m)                                                        |
| 24     | 14130      | DM_dgtp(n)               | DM_dgtp(n)                                                        |
| 25     | 941        | DM_dhap(c)               | Dihydroxyacetone phosphate demand                                 |
| 26     | 20467      | DM_dsT_antigen(g)        | DM_dsT_antigen(g)                                                 |
| 27     | 19373      | DM_dttp(m)               | dTTP demand                                                       |
| 28     | 14131      | DM_dttp(n)               | DM_dttp(n)                                                        |
| 29     | 20347      | DM_ethamp(r)             | Ethanolamine phosphate demand                                     |
| 30     | 13542      | DM_fadh(m)               | fadh demand                                                       |
| 31     | 13502      | DM_g3p(c)                | DM_g3p(c)                                                         |
| 32     | 13381      | DM_glc(c)                | glucose demand                                                    |
| 33     | 13438      | DM_glc(r)                | glucuronate demand                                                |
| 34     | 2319       | DM_gmp(c)                | DM_gmp(c)                                                         |
| 35     | 20468      | DM_gpi_sig(er)           | DM_gpi_sig(er)                                                    |
| 36     | 9284       | DM_gtp2                  | gtp demand 2                                                      |
| 37     | 13437      | DM_guln                  | gulonate demand                                                   |
| 38     | 14928      | DM_ha(e)                 | DM_ha(e)                                                          |
| 39     | 19553      | DM_hretn(n)              | 4 hydroxy retinoic acid demand                                    |
| 40     | 9272       | DM_imp                   | imp demand                                                        |
| 41     | 20469      | DM_kdn(c)                | DM_kdn(c)                                                         |
| 42     | 13300      | DM_lac-D/atp/h2o         | anaerobic glycolysis demand                                       |
| 43     | 14742      | DM_malcoa(m)             | malcoa demand                                                     |
| 44     | 20464      | DM_melanin(c)            | DM_melanin(c)                                                     |
| 45     | 19554      | DM_oretn(n)              | 4-oxo-retinoic acid demand                                        |
| 46     | 14576      | DM_pydx5p(c)             | DM_pydx5p(c)                                                      |
| 47     | 945        | DM_pyr(c)                | Pyruvate demand                                                   |
| 48     | 10039      | DM_pyr(m)                | Pyruvate demand                                                   |
| 49     | 14230      | DM_q10(c)                | DM_q10(c)                                                         |
| 50     | 14233      | DM_q10(m)                | DM_q10(m)                                                         |
| 51     | 20472      | DM_sTn_antigen(g)        | DM_sTn_antigen(g)                                                 |
| 52     | 20463      | DM_sprm(c)               | DM_sprm(c)                                                        |
| 53     | 14076      | DM_thmpp(c)              | Thiamin pyrophosphate demand                                      |
| 54     | 14071      | DM_thmpp(m)              | Thiamin pyrophosphate demand                                      |
| 55     | 3013       | DM_uacgam(c)             | uacgam demand                                                     |

| Column | Reaction # | Abbreviation           | Reaction Name                                         |
|--------|------------|------------------------|-------------------------------------------------------|
| 56     | 2321       | DM_ump(c)              | DM_ump(c)                                             |
| 57     | 14086      | DM_urate(x)            | DM_urate(x)                                           |
| 58     | 20253      | DM_yvite(c)            | gamma-Tocopherol demand                               |
| 59     | 14932      | HADEGly                | hyaluronan degradation demand function                |
| 60     | 13327      | M_amet                 | amet maintenance reaction                             |
| 61     | 14801      | NGLYDEGly              | N-glycan degradation optimization function, lysosomal |
| 62     | 10533      | sink_urea              | sink_urea                                             |
| 63     | 12730      | EX_10fthf(e)           | 10-Formyltetrahydrofolate exchange                    |
| 64     | 14905      | EX_10fthf5glu(e)       | 10-formyltetrahydrofolate-[Glu](5) exchange           |
| 65     | 14906      | EX_10fthf6glu(e)       | 10-formyltetrahydrofolate-[Glu](6) exchange           |
| 66     | 14907      | EX_10fthf7glu(e)       | 10-formyltetrahydrofolate-[Glu](7) exchange           |
| 67     | 15122      | EX_11-cis-retfa(e)     | fatty acid 11-cis-retinol exchange                    |
| 68     | 20388      | EX_13-cis-retnglc(e)   | 13-cis-retinoyl glucuronide exchange                  |
| 69     | 14077      | EX_1glyc_hs(e)         | 1 acyl phosphoglycerol exchange                       |
| 70     | 10938      | EX_1mncam(e)           | 1-Methylnicotinamide exchange                         |
| 71     | 11640      | EX_2425dhvitd2(e)      | 24R,25-Dihydroxyvitamin D2 exchange                   |
| 72     | 11641      | EX_2425dhvitd3(e)      | 24R,25-Dihydroxyvitamin D3 exchange                   |
| 73     | 20437      | EX_24nph(e)            | 2,4 dihydroxy nitrophenol exchange                    |
| 74     | 11642      | EX_25hvitd2(e)         | 25-Hydroxyvitamin D2 exchange                         |
| 75     | 11643      | EX_25hvitd3(e)         | 25-Hydroxyvitamin D3 exchange                         |
| 76     | 12491      | EX_2hb(e)              | 2-Hydroxybutyrate exchange                            |
| 77     | 20839      | EX_2mctit(e)           | 2-Methylcitrate exchange                              |
| 78     | 14613      | EX_34dhoxpeg(e)        | 3,4-Dihydroxyphenylethyleneglycol exchange            |
| 79     | 12585      | EX_34dhphe(e)          | 3,4-Dihydroxy-L-phenylalanine exchange                |
| 80     | 12627      | EX_35cgmp(e)           | 3',5'-Cyclic GMP exchange                             |
| 81     | 12085      | EX_3aib(e)             | L-3-Amino-isobutanoate exchange                       |
| 82     | 20419      | EX_3aib-D(e)           | D-3-Amino-isobutanoate exchange                       |
| 83     | 14614      | EX_3mlda(e)            | 3-Methylimidazoleacetic acid exchange                 |
| 84     | 827        | EX_4abut(e)            | 4-Aminobutanoate exchange                             |
| 85     | 20408      | EX_4hdebrisoquine(e)   | 4 hydroxy debrisoquine exchange                       |
| 86     | 9538       | EX_4hphac(e)           | 4-Hydroxyphenylacetate exchange                       |
| 87     | 20425      | EX_4mtolbutamide(e)    | 4 hydroxy tolbutamide exchange                        |
| 88     | 20431      | EX_4nph(e)             | 4-Nitrophenol exchange                                |
| 89     | 20432      | EX_4nphsf(e)           | 4-Nitrophenyl sulfate exchange                        |
| 90     | 11003      | EX_4pyrdx(e)           | 4-Pyridoxate exchange                                 |
| 91     | 20374      | EX_5adtststerone(e)    | 5alpha-Dihydrotestosterone exchange                   |
| 92     | 20377      | EX_5adtststeroneglc(e) | 5alpha-Dihydrotestosterone glucuronide exchange       |
| 93     | 20387      | EX_5adtststerones(e)   | 5alpha-Dihydrotestosterone sulfate exchange           |
| 94     | 14908      | EX_5dhf(e)             | pentaglutamyl folate (DHF) exchange                   |
| 95     | 14840      | EX_5fthf(e)            | 5-Formyltetrahydrofolate exchange                     |
| 96     | 20414      | EX_5homeprazole(e)     | 5 hydroxy omeprazole exchange                         |
| 97     | 12034      | EX_5htrp(e)            | 5-Hydroxy-L-tryptophan exchange                       |
| 98     | 14841      | EX_5mthf(e)            | 5-Methyltetrahydrofolate exchange                     |
| 99     | 14909      | EX_5thf(e)             | pentaglutamyl folate (THF) exchange                   |
| 100    | 14910      | EX_6dhf(e)             | haxglutamyl folate (DHF) exchange                     |
| 101    | 20433      | EX_6htststerone(e)     | 6 beta hydroxy testosterone exchange                  |
| 102    | 14911      | EX_6thf(e)             | hexaglutamyl folate (THF) exchange                    |
| 103    | 14912      | EX_7dhf(e)             | heptaglutamyl folate (DHF) exchange                   |
| 104    | 14913      | EX_7thf(e)             | heptaglutamyl folate (THF) exchange                   |
| 105    | 15123      | EX_9-cis-retfa(e)      | fatty acid 9-cis-retinol exchange                     |
| 106    | 12499      | EX_CLPND(e)            | clupanodonic acid (docosapentaenoic (n-3)) exchange   |
| 107    | 12035      | EX_Lcystin(e)          | L-Cystine exchange                                    |
| 108    | 14078      | EX_Rtotal(e)           | R total exchange                                      |
| 109    | 12138      | EX_Rtotal2(e)          | R total 2 position exchange                           |
| 110    | 12139      | EX_Rtotal3(e)          | R total 3 position exchange                           |

| Column | Reaction # | Abbreviation                                             | Reaction Name                                                              |
|--------|------------|----------------------------------------------------------|----------------------------------------------------------------------------|
| 111    | 10421      | EX_Tyr-ggn(e)                                            | Tyr-194 of apo-glycogenin protein (primer for glycogen synthesis) exchange |
| 112    | 2300       | EX_abt(e)                                                | L-Arabinitol exchange                                                      |
| 113    | 828        | EX_ac(e)                                                 | Acetate exchange                                                           |
| 114    | 3659       | EX_acac(e)                                               | Acetoacetate exchange                                                      |
| 115    | 1456       | EX_acald(e)                                              | Acetaldehyde exchange                                                      |
| 116    | 12492      | EX_acetone(e)                                            | Acetone exchange                                                           |
| 117    | 20442      | EX_acgalfucgalacgalfuc12gal14acglcgalgluside_hs(e)       | Type IIIA glycolipid exchange                                              |
| 118    | 20356      | EX_acgalfucgalacgalfucgalacglcgal14acglcgalgluside_hs(e) | Type IIIAb exchange                                                        |
| 119    | 1045       | EX_acgam(e)                                              | N-Acetyl-D-glucosamine exchange                                            |
| 120    | 12036      | EX_ach(e)                                                | Acetylcholine exchange                                                     |
| 121    | 20380      | EX_acn13acngalgsbside_hs(e)                              | sialyl (1,3) sialyl (2,6) galactosylgloboside (homo sapiens) exchange      |
| 122    | 20381      | EX_acn23acngalgsbside_hs(e)                              | sialyl (2,3) sialyl (2,6) galactosylgloboside (homo sapiens) exchange      |
| 123    | 20383      | EX_acnacngal14acglcgalgluside_hs(e)                      | 3',8'-LD1 exchange                                                         |
| 124    | 20385      | EX_acnacngalgsbside_hs(e)                                | disialyl galactosylgloboside (homo sapiens) exchange                       |
| 125    | 20386      | EX_acngalacglcgal14acglcgalgluside_hs(e)                 | VI3NeuAc-nLc6Cer exchange                                                  |
| 126    | 826        | EX_ade(e)                                                | Adenine exchange                                                           |
| 127    | 758        | EX_adn(e)                                                | Adenosine exchange                                                         |
| 128    | 4069       | EX_adp                                                   | adp exchange                                                               |
| 129    | 15038      | EX_adprbp(e)                                             | ADPribose 2'-phosphate exchange                                            |
| 130    | 15039      | EX_adprib(e)                                             | ADPribose exchange                                                         |
| 131    | 12493      | EX_adrn(e)                                               | adrenic acid exchange                                                      |
| 132    | 12037      | EX_adrnl(e)                                              | Adrenaline exchange                                                        |
| 133    | 20427      | EX_aflatoxin(e)                                          | aflatoxin B1 exchange                                                      |
| 134    | 20430      | EX_ahandrostanglc(e)                                     | Etiocolan-3alpha-ol-17-one 3-glucuronide exchange                          |
| 135    | 15040      | EX_ak2lgchol_hs(e)                                       | 1-alkyl 2-lysoglycerol 3-phosphocholine exchange                           |
| 136    | 829        | EX_akg(e)                                                | 2-Oxoglutarate exchange                                                    |
| 137    | 8154       | EX_ala-B(e)                                              | beta-Alanine exchange                                                      |
| 138    | 1064       | EX_ala-D(e)                                              | D-Alanine exchange                                                         |
| 139    | 830        | EX_ala-L(e)                                              | L-Alanine exchange                                                         |
| 140    | 20353      | EX_aldstrn(e)                                            | Aldosterone exchange                                                       |
| 141    | 2026       | EX_amp(e)                                                | AMP exchange                                                               |
| 142    | 20357      | EX_andrstrn(e)                                           | Androsterone exchange                                                      |
| 143    | 20359      | EX_andrstrnglc(e)                                        | androsterone glucuronide exchange                                          |
| 144    | 20361      | EX_antipyrene(e)                                         | antipyrene exchange                                                        |
| 145    | 20364      | EX_apnox(e)                                              | alpha-Pinene-oxide exchange                                                |
| 146    | 20365      | EX_appnn(e)                                              | (+)-alpha-Pinene exchange                                                  |
| 147    | 20368      | EX_aprgstrn(e)                                           | 20alpha-Hydroxyprogesterone exchange                                       |
| 148    | 14705      | EX_aqcobal(e)                                            | Aquacob(III)alamin exchange                                                |
| 149    | 680        | EX_arab-L(e)                                             | L-Arabinose exchange                                                       |
| 150    | 12494      | EX_arach(e)                                              | Arachidic acid exchange                                                    |
| 151    | 4039       | EX_arachd(e)                                             | nC20:4 exchange                                                            |
| 152    | 831        | EX_arg-L(e)                                              | L-Arginine exchange                                                        |
| 153    | 8153       | EX_ascb-L(e)                                             | L-Ascorbate exchange                                                       |
| 154    | 832        | EX_asn-L(e)                                              | L-Asparagine exchange                                                      |
| 155    | 12038      | EX_asp-D(e)                                              | D-Aspartate exchange                                                       |
| 156    | 833        | EX_asp-L(e)                                              | L-Aspartate exchange                                                       |

| Column | Reaction # | Abbreviation       | Reaction Name                                                                    |
|--------|------------|--------------------|----------------------------------------------------------------------------------|
| 157    | 4147       | EX_atp(e)          | ATP exchange                                                                     |
| 158    | 11644      | EX_avite1(e)       | alpha-Tocopherol exchange                                                        |
| 159    | 11645      | EX_avite2(e)       | alpha-Tocotrienol exchange                                                       |
| 160    | 5492       | EX_bhb(e)          | (R)-3-Hydroxybutanoate transport via H+ symport                                  |
| 161    | 12495      | EX_bildglcur(e)    | Bilirubin beta-diglucuronide exchange                                            |
| 162    | 12496      | EX_bilglcur(e)     | Bilirubin monoglucuronide exchange                                               |
| 163    | 8476       | EX_bilirub(e)      | Bilirubin exchange                                                               |
| 164    | 10939      | EX_biocyt(e)       | Biocytin exchange                                                                |
| 165    | 1608       | EX_btn(e)          | Biotin exchange                                                                  |
| 166    | 2629       | EX_but(e)          | Butyrate (n-C4:0) exchange                                                       |
| 167    | 11646      | EX_bvite(e)        | beta-tocopherol exchange                                                         |
| 168    | 20920      | EX_bz(e)           | Benzoate exchange                                                                |
| 169    | 8748       | EX_ca2(e)          | Calcium exchange                                                                 |
| 170    | 12628      | EX_camp(e)         | cAMP exchange                                                                    |
| 171    | 11004      | EX_caro(e)         | beta-Carotene exchange                                                           |
| 172    | 20348      | EX_carveol(e)      | (E)-carveol exchange                                                             |
| 173    | 11647      | EX_cca_d3(e)       | Calcitroic acid (D3) exchange                                                    |
| 174    | 10940      | EX_cgly(e)         | Cys-Gly exchange                                                                 |
| 175    | 1047       | EX_chol(e)         | Choline exchange                                                                 |
| 176    | 12497      | EX_cholate(e)      | Cholate exchange                                                                 |
| 177    | 12629      | EX_chsterol(e)     | Cholesterol exchange                                                             |
| 178    | 10942      | EX_chtn(e)         | chitin exchange                                                                  |
| 179    | 1048       | EX_cit(e)          | Citrate exchange                                                                 |
| 180    | 9537       | EX_cl(e)           | Chloride exchange                                                                |
| 181    | 10943      | EX_cmp(e)          | CMP exchange                                                                     |
| 182    | 8580       | EX_co(e)           | Carbon monoxide exchange                                                         |
| 183    | 805        | EX_co2(e)          | CO2 exchange                                                                     |
| 184    | 20382      | EX_coumarin(e)     | coumarin exchange                                                                |
| 185    | 12039      | EX_creat(e)        | Creatine exchange                                                                |
| 186    | 20384      | EX_crmp_hs(e)      | Ceramide 1-phosphate exchange                                                    |
| 187    | 706        | EX_crn(e)          | L-Carnitine exchange                                                             |
| 188    | 4040       | EX_crvnc(e)        | nC22:6 exchange                                                                  |
| 189    | 835        | EX_csn(e)          | Cytosine exchange                                                                |
| 190    | 14974      | EX_cspg_a(e)       | chondroitin sulfate A (GalNAc4S-GlcA) proteoglycan exchange                      |
| 191    | 14975      | EX_cspg_b(e)       | chondroitin sulfate B / dermatan sulfate (IdoA2S-GalNAc4S) proteoglycan exchange |
| 192    | 14976      | EX_cspg_c(e)       | chondroitin sulfate C (GalNAc6S-GlcA) proteoglycan exchange                      |
| 193    | 14979      | EX_cspg_d(e)       | chondroitin sulfate D (GlcNAc6S-GlcA2S) proteoglycan exchange                    |
| 194    | 14973      | EX_cspg_e(e)       | chondroitin sulfate E (GalNAc4,6diS-GlcA) proteoglycan exchange                  |
| 195    | 13944      | EX_cyan(e)         | Hydrogen cyanide exchange                                                        |
| 196    | 1065       | EX_cys-L(e)        | L-Cysteine exchange                                                              |
| 197    | 836        | EX_cyt(d)(e)       | Cytidine exchange                                                                |
| 198    | 4137       | EX_dad-2(e)        | Deoxyadenosine exchange                                                          |
| 199    | 10422      | EX_dad-5(e)        | 5'-Deoxyadenosine exchange                                                       |
| 200    | 12133      | EX_dag_hs(e)       | diacylglycerol (homo sapiens) exchange                                           |
| 201    | 12498      | EX_dcsptn1(e)      | docosa-4,7,10,13,16-pentaenoic acid (n-6) exchange                               |
| 202    | 837        | EX_dcyt(e)         | Deoxycytidine exchange                                                           |
| 203    | 12500      | EX_debrisoquine(e) | debrisoquine exchange                                                            |
| 204    | 20446      | EX_dgchol(e)       | Chenodeoxyglycocholate exchange                                                  |
| 205    | 1610       | EX_dgsn(e)         | Deoxyguanosine exchange                                                          |
| 206    | 12040      | EX_dhdascb(e)      | Dehydroascorbate exchange                                                        |
| 207    | 12501      | EX_dheas(e)        | Dehydroepiandrosterone sulfate exchange                                          |

| Column | Reaction # | Abbreviation                                             | Reaction Name                                             |
|--------|------------|----------------------------------------------------------|-----------------------------------------------------------|
| 208    | 14914      | EX_dhf(e)                                                | 7,8-Dihydrofolate exchange                                |
| 209    | 20358      | EX_digalsgalside_hs(e)                                   | Digalactosylceramidesulfate exchange                      |
| 210    | 1611       | EX_din(e)                                                | Deoxyinosine exchange                                     |
| 211    | 12502      | EX_dlnlge(e)                                             | dihomo-gamma-linolenic acid (n-6) exchange                |
| 212    | 20362      | EX_dmantipyrine(e)                                       | demethylated antipyrine exchange                          |
| 213    | 20363      | EX_dmhptcrn(e)                                           | 2,6 dimethylheptanoyl carnitine exchange                  |
| 214    | 12041      | EX_dopa(e)                                               | Dopamine exchange                                         |
| 215    | 19506      | EX_dopasf(e)                                             | Dopamine 3-O-sulfate exchange                             |
| 216    | 20366      | EX_drib(e)                                               | Deoxyribose exchange                                      |
| 217    | 1066       | EX_duri(e)                                               | Deoxyuridine exchange                                     |
| 218    | 20369      | EX_eaflatoxin(e)                                         | 8,9 epoxy aflatoxin B1 exchange                           |
| 219    | 20372      | EX_ebastine(e)                                           | ebastine exchange                                         |
| 220    | 20373      | EX_ebastineoh(e)                                         | hydroxylated ebastine exchange                            |
| 221    | 12503      | EX_eicostet(e)                                           | eicosatetraenoic acid exchange                            |
| 222    | 12504      | EX_elaid(e)                                              | elaidic acid exchange                                     |
| 223    | 12505      | EX_estradiolglc(e)                                       | estradiol glucuronide exchange                            |
| 224    | 20379      | EX_estriolglc(e)                                         | 16-Glucuronide-estriol exchange                           |
| 225    | 14079      | EX_estroneglc(e)                                         | estrone glucuronide exchange                              |
| 226    | 12506      | EX_estrone(s)                                            | Estrone 3-sulfate exchange                                |
| 227    | 839        | EX_etoh(e)                                               | Ethanol exchange                                          |
| 228    | 1310       | EX_fe2(e)                                                | Fe2+ exchange                                             |
| 229    | 707        | EX_fe3(e)                                                | Fe3+ exchange                                             |
| 230    | 8752       | EX_fol(e)                                                | Folate exchange                                           |
| 231    | 1067       | EX_for(e)                                                | Formate exchange                                          |
| 232    | 681        | EX_fru(e)                                                | D-Fructose exchange                                       |
| 233    | 2028       | EX_fuc-L(e)                                              | L-Fucose exchange                                         |
| 234    | 20389      | EX_fuc13galacglcgall4acglcgalgluside_hs(e)               | III3Fuc-nLc6Cer exchange                                  |
| 235    | 20390      | EX_fuc14galacglcgall4acglcgalgluside_hs(e)               | Lea glycolipid exchange                                   |
| 236    | 20393      | EX_fucacgalfucgalacglcgall4acglcgalgluside_hs(e)         | (Gal)2 (GalNAc)1 (Glc)1 (GlcNAc)1 (LFuc)2 (Cer)1 exchange |
| 237    | 20394      | EX_fucacngal14acglcgall4acglcgalgluside_hs(e)            | IV3-a-NeuAc,III3-a-Fuc-nLc4Cer exchange                   |
| 238    | 20395      | EX_fucacngalacglcgall4acglcgalgluside_hs(e)              | IV3-a-Neu5Ac,III4-a-Fuc-Lc4Cer exchange                   |
| 239    | 20396      | EX_fucfuc12gal14acglcgall4acglcgalgluside_hs(e)          | Ley glycolipid exchange                                   |
| 240    | 20397      | EX_fucfuc132galacglcgall4acglcgalgluside_hs(e)           | V3Fuc,III3Fuc-nLc6Cer exchange                            |
| 241    | 20398      | EX_fucfucfucgalacglc13galacglcgall4acglcgalgluside_hs(e) | (Gal)4 (Glc)1 (GlcNAc)3 (LFuc)3 (Cer)1 exchange           |
| 242    | 20401      | EX_fucfucfucgalacglcgall4acglcgalgluside_hs(e)           | (Gal)3 (Glc)1 (GlcNAc)2 (LFuc)3 (Cer)1 exchange           |
| 243    | 20403      | EX_fucfucgalacglcgall4acglcgalgluside_hs(e)              | Leb glycolipid exchange                                   |
| 244    | 20405      | EX_fucgal14acglcgall4acglcgalgluside_hs(e)               | Lacto-N-fucopentaosyl III ceramide exchange               |
| 245    | 20406      | EX_fucgalfucgalacglcgall4acglcgalgluside_hs(e)           | (Gal)3 (Glc)1 (GlcNAc)1 (LFuc)2 (Cer)1 exchange           |
| 246    | 20407      | EX_fucgalgbside_hs(e)                                    | fucosyl galactosylgloboside (homo sapiens) exchange       |
| 247    | 682        | EX_gal(e)                                                | D-Galactose exchange                                      |
| 248    | 20409      | EX_galacglcgall4acglcgalgbside_hs(e)                     | Gal-GlcNAc-Gal globoside (homo sapiens) exchange          |

| Column | Reaction # | Abbreviation                                                     | Reaction Name                                                               |
|--------|------------|------------------------------------------------------------------|-----------------------------------------------------------------------------|
| 249    | 20410      | EX_galfuc12gal14acglcgalgl<br>uside_hs(e)                        | (Gal)3 (Glc)1 (GlcNAc)1 (LFuc)1 (Cer)1 exchange                             |
| 250    | 20411      | EX_galfucgalacglcgal14acglc<br>galgluside_hs(e)                  | (Gal)4 (Glc)1 (GlcNAc)2 (LFuc)1 (Cer)1 exchange                             |
| 251    | 20412      | EX_galgalfucfucgalacglcgal<br>cglcgal14acglcgalgluside_hs(<br>e) | (Gal)6 (Glc)1 (GlcNAc)3 (LFuc)2 (Cer)1 exchange                             |
| 252    | 20413      | EX_galgalgalthcrm_hs(e)                                          | Gal-Gal-Gal-Gal-Gal-Glc-Cer (homo sapiens) exchange                         |
| 253    | 708        | EX_gam(e)                                                        | D-Glucosamine exchange                                                      |
| 254    | 20417      | EX_gbside_hs(e)                                                  | globoside (homo sapiens) exchange                                           |
| 255    | 12507      | EX_gchola(e)                                                     | glycocholate exchange                                                       |
| 256    | 20420      | EX_gd1b2_hs(e)                                                   | GD1beta (homo sapiens) exchange                                             |
| 257    | 20421      | EX_gd1c_hs(e)                                                    | GD1c (homo sapiens) exchange                                                |
| 258    | 20422      | EX_gdchola(e)                                                    | glycochenodeoxycholate exchange                                             |
| 259    | 8166       | EX_gdp(e)                                                        | GDP exchange                                                                |
| 260    | 13047      | EX_glc(c)                                                        | D-Glucose exchange                                                          |
| 261    | 99         | EX_glc(e)                                                        | D-Glucose exchange                                                          |
| 262    | 710        | EX_gln-L(e)                                                      | L-Glutamine exchange                                                        |
| 263    | 841        | EX_glu-L(e)                                                      | L-Glutamate exchange                                                        |
| 264    | 10944      | EX_gluala(e)                                                     | 5-L-Glutamyl-L-alanine exchange                                             |
| 265    | 1068       | EX_gly(e)                                                        | Glycine exchange                                                            |
| 266    | 4150       | EX_glyb(e)                                                       | Glycine betaine exchange                                                    |
| 267    | 711        | EX_glyc(e)                                                       | Glycerol exchange                                                           |
| 268    | 20434      | EX_glyc-S(e)                                                     | (S)-Glycerate exchange                                                      |
| 269    | 10423      | EX_glygn2(e)                                                     | glycogen, structure 2 (glycogenin-1,6-{7[1,4-Glc], 4[1,4-Glc]})<br>exchange |
| 270    | 10424      | EX_glygn4(e)                                                     | glycogen, structure 4 (glycogenin-1,6-{2[1,4-Glc], [1,4-Glc]})<br>exchange  |
| 271    | 10425      | EX_glygn5(e)                                                     | glycogen, structure 5 (glycogenin-2[1,4-Glc]) exchange                      |
| 272    | 10945      | EX_gmp(e)                                                        | GMP exchange                                                                |
| 273    | 20349      | EX_gp1c_hs(e)                                                    | GP1c (homo sapiens) exchange                                                |
| 274    | 20350      | EX_gp1calpha_hs(e)                                               | GP1c alpha (homo sapiens) exchange                                          |
| 275    | 20351      | EX_gq1b_hs(e)                                                    | GQ1b (homo sapiens) exchange                                                |
| 276    | 20352      | EX_gq1balpha_hs(e)                                               | GQ1balpha (homo sapiens) exchange                                           |
| 277    | 1069       | EX_gsn(e)                                                        | Guanosine exchange                                                          |
| 278    | 20355      | EX_gt1a_hs(e)                                                    | GT1a (homo sapiens) exchange                                                |
| 279    | 1614       | EX_gthox(e)                                                      | Oxidized glutathione exchange                                               |
| 280    | 2571       | EX_gthrd(e)                                                      | Reduced glutathione exchange                                                |
| 281    | 8167       | EX_gtp(e)                                                        | GTP exchange                                                                |
| 282    | 842        | EX_gua(e)                                                        | Guanine exchange                                                            |
| 283    | 104        | EX_h(e)                                                          | H+ exchange                                                                 |
| 284    | 100        | EX_h2o(e)                                                        | H2O exchange                                                                |
| 285    | 10946      | EX_h2o2(e)                                                       | Hydrogen peroxide exchange                                                  |
| 286    | 14615      | EX_ha(e)                                                         | hyaluronan exchange                                                         |
| 287    | 14616      | EX_ha_pre1(e)                                                    | hyaluronan biosynthesis, precursor 1 exchange                               |
| 288    | 12134      | EX_hco3(e)                                                       | Bicarbonate exchange                                                        |
| 289    | 20367      | EX_hcoumarin(e)                                                  | hydroxy coumarin exchange                                                   |
| 290    | 4143       | EX_hdca(e)                                                       | Hexadecanoate (n-C16:0) exchange                                            |
| 291    | 2040       | EX_hdcea(e)                                                      | hexadecenoate (n-C16:1) exchange                                            |
| 292    | 20371      | EX_hestriatriol(e)                                               | 4,17 dihydroxy estradiol exchange                                           |
| 293    | 12508      | EX_hexc(e)                                                       | hexacosanoate (n-C26:0) exchange                                            |
| 294    | 843        | EX_his-L(e)                                                      | L-Histidine exchange                                                        |
| 295    | 12042      | EX_hista(e)                                                      | Histamine exchange                                                          |
| 296    | 12043      | EX_hom-L(e)                                                      | L-Homoserine exchange                                                       |
| 297    | 20376      | EX_hpdc(a)                                                       | heptadecanoate exchange                                                     |
| 298    | 14972      | EX_hspg(e)                                                       | heparan sulfate proteoglycan exchange                                       |

| Column | Reaction # | Abbreviation                                   | Reaction Name                                                                                                                                                                                                |
|--------|------------|------------------------------------------------|--------------------------------------------------------------------------------------------------------------------------------------------------------------------------------------------------------------|
| 299    | 20378      | EX_htaxol(e)                                   | hydroxylated taxol exchange                                                                                                                                                                                  |
| 300    | 844        | EX_hxan(e)                                     | Hypoxanthine exchange                                                                                                                                                                                        |
| 301    | 12135      | EX_i(e)                                        | Iodide exchange                                                                                                                                                                                              |
| 302    | 11255      | EX_idp(e)                                      | IDP exchange                                                                                                                                                                                                 |
| 303    | 845        | EX_ile-L(e)                                    | L-Isoleucine exchange                                                                                                                                                                                        |
| 304    | 11256      | EX_imp(e)                                      | IMP exchange                                                                                                                                                                                                 |
| 305    | 712        | EX_inost(e)                                    | myo-Inositol exchange                                                                                                                                                                                        |
| 306    | 759        | EX_ins(e)                                      | Inosine exchange                                                                                                                                                                                             |
| 307    | 846        | EX_k(e)                                        | K+ exchange                                                                                                                                                                                                  |
| 308    | 14617      | EX_ksi(e)                                      | keratan sulfate I exchange                                                                                                                                                                                   |
| 309    | 14618      | EX_ksi_deg1(e)                                 | keratan sulfate I, degradation product 1 exchange                                                                                                                                                            |
| 310    | 14977      | EX_ksii_core2(e)                               | keratan sulfate II (core 2-linked) exchange                                                                                                                                                                  |
| 311    | 14978      | EX_ksii_core4(e)                               | keratan sulfate II (core 4-linked) exchange                                                                                                                                                                  |
| 312    | 3075       | EX_lac-D(e)                                    | D-lactate exchange                                                                                                                                                                                           |
| 313    | 847        | EX_lac-L(e)                                    | L-Lactate exchange                                                                                                                                                                                           |
| 314    | 2032       | EX_lcts(e)                                     | Lactose exchange                                                                                                                                                                                             |
| 315    | 848        | EX_leu-L(e)                                    | L-Leucine exchange                                                                                                                                                                                           |
| 316    | 12509      | EX_leuktrC4(e)                                 | Leukotriene C4 exchange                                                                                                                                                                                      |
| 317    | 12510      | EX_lgnc(e)                                     | lignoceric acid exchange                                                                                                                                                                                     |
| 318    | 20399      | EX_limnen(e)                                   | Limonene exchange                                                                                                                                                                                            |
| 319    | 9487       | EX_lipoate(e)                                  | Lipoate exchange                                                                                                                                                                                             |
| 320    | 12511      | EX_lneldc(e)                                   | linoelaidic acid exchange                                                                                                                                                                                    |
| 321    | 14080      | EX_lnlc(e)                                     | linoleic acid (all cis C18:2) exchange                                                                                                                                                                       |
| 322    | 12512      | EX_lnlc(e) [deleted<br>08/16/2005 05:23:37 PM] | linoleic acid exchange                                                                                                                                                                                       |
| 323    | 12513      | EX_lnlnc(a)                                    | alpha-Linolenic acid exchange                                                                                                                                                                                |
| 324    | 12514      | EX_lnlncg(e)                                   | gamma-linolenic acid exchange                                                                                                                                                                                |
| 325    | 12136      | EX_lpchol_hs(e)                                | lysophosphatidylcholine (homo sapiens) exchange                                                                                                                                                              |
| 326    | 1072       | EX_lys-L(e)                                    | L-Lysine exchange                                                                                                                                                                                            |
| 327    | 14081      | EX_mag_hs(e)                                   | monoacylglycerol 2 (homo sapiens) exchange                                                                                                                                                                   |
| 328    | 713        | EX_malt(e)                                     | Maltose exchange                                                                                                                                                                                             |
| 329    | 3253       | EX_malttr(e)                                   | Maltotriose exchange                                                                                                                                                                                         |
| 330    | 714        | EX_man(e)                                      | D-Mannose exchange                                                                                                                                                                                           |
| 331    | 2631       | EX_man6p(e)                                    | D-Mannose 6-phosphate exchange                                                                                                                                                                               |
| 332    | 7746       | EX_meoh(e)                                     | methanol exchange                                                                                                                                                                                            |
| 333    | 20415      | EX_mepi(e)                                     | Metanephrine exchange                                                                                                                                                                                        |
| 334    | 20416      | EX_mercplaccys(e)                              | 3-mercaptolactate-cysteine disulfide exchange                                                                                                                                                                |
| 335    | 1120       | EX_met-L(e)                                    | L-Methionine exchange                                                                                                                                                                                        |
| 336    | 14823      | EX_mthgxl(e)                                   | Methylglyoxal exchange                                                                                                                                                                                       |
| 337    | 20919      | EX_n2m2nmasn(e)                                | N-Acetyl-beta-D-glucosaminyl-1,2-alpha-D-mannosyl-1,3-(N-acetyl-beta-D-glucosaminyl-1,2-alpha-D-mannosyl-1,6)-(N-acetyl-beta-D-glucosaminyl-1,4)-beta-D-mannosyl-1,4-N-acetyl-beta-D-glucosaminyl-R exchange |
| 338    | 850        | EX_na1(e)                                      | Sodium exchange                                                                                                                                                                                              |
| 339    | 2033       | EX_nac(e)                                      | Nicotinate exchange                                                                                                                                                                                          |
| 340    | 2034       | EX_nad(e)                                      | Nicotinamide adenine dinucleotide exchange                                                                                                                                                                   |
| 341    | 10111      | EX_nadp(e)                                     | Nicotinamide adenine dinucleotide phosphate exchange                                                                                                                                                         |
| 342    | 8203       | EX_ncam(e)                                     | Nicotinamide exchange                                                                                                                                                                                        |
| 343    | 892        | EX_nh4(e)                                      | Ammonia exchange                                                                                                                                                                                             |
| 344    | 20428      | EX_nifedipine(e)                               | nifedipine exchange                                                                                                                                                                                          |
| 345    | 6011       | EX_no(e)                                       | Nitric oxide exchange                                                                                                                                                                                        |
| 346    | 20429      | EX_npthl(e)                                    | Naphthalene exchange                                                                                                                                                                                         |
| 347    | 12044      | EX_nrpphr(e)                                   | Norepinephrine exchange                                                                                                                                                                                      |
| 348    | 19507      | EX_nrpphrsf(e)                                 | Sulfate derivative of norepinephrine exchange                                                                                                                                                                |
| 349    | 12515      | EX_nrvnc(e)                                    | nervonic acid exchange                                                                                                                                                                                       |
| 350    | 804        | EX_o2(e)                                       | O2 exchange                                                                                                                                                                                                  |



| Column | Reaction # | Abbreviation                                      | Reaction Name                                                     |
|--------|------------|---------------------------------------------------|-------------------------------------------------------------------|
| 351    | 12318      | EX_o2s(e)                                         | Superoxide anion exchange                                         |
| 352    | 20435      | EX_oagd3_hs(e)                                    | 9-O-Acetylated GD3 (homo sapiens) exchange                        |
| 353    | 20436      | EX_oagt3_hs(e)                                    | 9-O-Acetylated GT3 (homo sapiens) exchange                        |
| 354    | 2035       | EX_ocdca(e)                                       | octadecanoate (n-C18:0) exchange                                  |
| 355    | 4144       | EX_ocdcea(e)                                      | octadecenoate (n-C18:1) exchange                                  |
| 356    | 8163       | EX_octa(e)                                        | octanoate (n-C8:0) exchange                                       |
| 357    | 3809       | EX_oh1                                            | OH1 Exchange                                                      |
| 358    | 20447      | EX_omeprazole(e)                                  | omeprazole exchange                                               |
| 359    | 20448      | EX_onpthl(e)                                      | naphthalene epoxide exchange                                      |
| 360    | 852        | EX_orn(e)                                         | Ornithine exchange                                                |
| 361    | 12516      | EX_oxa(e)                                         | Oxalate exchange                                                  |
| 362    | 15041      | EX_paf_hs(e)                                      | 1-alkyl 2-acteylglycerol 3-phosphocholine (homo sapiens) exchange |
| 363    | 12137      | EX_pchol_hs(e)                                    | Phosphatidylcholine (homo sapiens) exchange                       |
| 364    | 15042      | EX_pe_hs(e)                                       | phosphatidylethanolamine (homo sapiens) exchange                  |
| 365    | 14824      | EX_peplys(e)                                      | Peptidyl-L-lysine exchange                                        |
| 366    | 20354      | EX_perillyl(e)                                    | Perillyl alcohol exchange                                         |
| 367    | 14082      | EX_pglyc_hs(e)                                    | phosphatidylglycerol (homo sapiens) exchange                      |
| 368    | 853        | EX_phe-L(e)                                       | L-Phenylalanine exchange                                          |
| 369    | 14619      | EX_pheacglN(e)                                    | alpha-N-Phenylacetyl-L-glutamine exchange                         |
| 370    | 7833       | EX_pheme(e)                                       | Protoheme exchange                                                |
| 371    | 10947      | EX_phyQ(e)                                        | Phylloquinone exchange                                            |
| 372    | 20360      | EX_phyt(e)                                        | phytanic acid exchange                                            |
| 373    | 101        | EX_pi(e)                                          | Phosphate exchange                                                |
| 374    | 1616       | EX_pnto-R(e)                                      | (R)-Pantothenate exchange                                         |
| 375    | 8443       | EX_ppa(e)                                         | Propionate exchange                                               |
| 376    | 11702      | EX_pro-D(e)                                       | D-Proline exchange                                                |
| 377    | 854        | EX_pro-L(e)                                       | L-Proline exchange                                                |
| 378    | 12517      | EX_prostgd2(e)                                    | Prostaglandin D2 exchange                                         |
| 379    | 12518      | EX_prostge1(e)                                    | Prostaglandin E1 exchange                                         |
| 380    | 12519      | EX_prostge2(e)                                    | Prostaglandin E2 exchange                                         |
| 381    | 12520      | EX_prostgf2(e)                                    | Prostaglandin F2alpha exchange                                    |
| 382    | 15043      | EX_ps_hs(e)                                       | phosphatidylserine (homo sapiens) exchange                        |
| 383    | 20370      | EX_ptdca(e)                                       | pentadecanoate exchange                                           |
| 384    | 11005      | EX_pydam(e)                                       | Pyridoxamine exchange                                             |
| 385    | 11006      | EX_pydx(e)                                        | Pyridoxal exchange                                                |
| 386    | 11007      | EX_pydxn(e)                                       | Pyridoxine exchange                                               |
| 387    | 855        | EX_pyr(e)                                         | Pyruvate exchange                                                 |
| 388    | 20375      | EX_rbt(e)                                         | Ribitol exchange                                                  |
| 389    | 15070      | EX_retfa(e)                                       | fatty acid retinol exchange                                       |
| 390    | 11008      | EX_retinol(e)                                     | Retinol exchange                                                  |
| 391    | 15125      | EX_retinol-9-cis(e)                               | 9-cis-retinol exchange                                            |
| 392    | 15126      | EX_retinol-cis-11(e)                              | cis-11-retinol exchange                                           |
| 393    | 15127      | EX_retn(e)                                        | Retinoate exchange                                                |
| 394    | 15128      | EX_retnqlc(e)                                     | retinoyl glucuronide exchange                                     |
| 395    | 15129      | EX_retpalm [deleted<br>10/09/2005 06:18:49 PM](e) | Retinyl palminate exchange                                        |
| 396    | 11009      | EX_retpalm(e) [deleted<br>10/09/2005 06:38:54 PM] | Retinyl palminate exchange                                        |
| 397    | 717        | EX_rib-D(e)                                       | D-Ribose exchange                                                 |
| 398    | 991        | EX_ribflv(e)                                      | Riboflavin exchange                                               |
| 399    | 10032      | EX_s2l2fn2m2masn(e)                               | PA6 exchange                                                      |
| 400    | 10033      | EX_s2l2n2m2masn(e)                                | de-Fuc form of PA6 exchange                                       |
| 401    | 14706      | EX_sarcs(e)                                       | Sarcosine exchange                                                |
| 402    | 12521      | EX_sel(e)                                         | Selenate exchange                                                 |
| 403    | 4138       | EX_ser-D(e)                                       | D-Serine exchange                                                 |

| Column | Reaction # | Abbreviation        | Reaction Name                                               |
|--------|------------|---------------------|-------------------------------------------------------------|
| 404    | 1074       | EX_ser-L(e)         | L-Serine exchange                                           |
| 405    | 14620      | EX_sl-L(e)          | L-sulfolactate exchange                                     |
| 406    | 719        | EX_so4(e)           | Sulfate exchange                                            |
| 407    | 20921      | EX_spc_hs(e)        | sphingosylphosphorylcholine (homo sapiens) exchange         |
| 408    | 20391      | EX_sph1p(e)         | Sphinganine 1-phosphate exchange                            |
| 409    | 20392      | EX_sphs1p(e)        | Sphingosine 1-phosphate exchange                            |
| 410    | 12522      | EX_srtn(e)          | Serotonin exchange                                          |
| 411    | 10426      | EX_strch1(e)        | starch, structure 1 (1,6-{7[1,4-Glc], 4[1,4-Glc]}) exchange |
| 412    | 10427      | EX_strch2(e)        | starch, structure 2 (1,6-{2[1,4-Glc], [1,4-Glc]}) exchange  |
| 413    | 12523      | EX_strdnc(e)        | stearidonic acid exchange                                   |
| 414    | 856        | EX_succ(e)          | Succinate exchange                                          |
| 415    | 720        | EX_sucr(e)          | Sucrose exchange                                            |
| 416    | 12140      | EX_tag_hs(e)        | triacylglycerol (homo sapiens) exchange                     |
| 417    | 20400      | EX_tagat-D(e)       | D-Tagatose exchange                                         |
| 418    | 2634       | EX_taur(e)          | Taurine exchange                                            |
| 419    | 20402      | EX_taxol(e)         | paclitaxel exchange                                         |
| 420    | 12524      | EX_tchola(e)        | Taurocholic acid exchange                                   |
| 421    | 13954      | EX_tcynt(e)         | Thiocyanate exchange                                        |
| 422    | 20404      | EX_tdchola(e)       | taurochenodeoxycholate exchange                             |
| 423    | 12525      | EX_tethex3(e)       | tetracosahexaenoic acid, n-3 exchange                       |
| 424    | 12526      | EX_tetpent3(e)      | tetracosapentaenoic acid, n-3 exchange                      |
| 425    | 12527      | EX_tetpent6(e)      | tetracosapentaenoic acid, n-6 exchange                      |
| 426    | 12528      | EX_tettet6(e)       | tetracosatetraenoic acid n-6 exchange                       |
| 427    | 12733      | EX_thf(e)           | 5,6,7,8-Tetrahydrofolate exchange                           |
| 428    | 1075       | EX_thm(e)           | Thiamin exchange                                            |
| 429    | 2298       | EX_thmmp(e)         | Thiamin monophosphate exchange                              |
| 430    | 14083      | EX_thmtp(e)         | Thiamin triphosphate exchange                               |
| 431    | 857        | EX_thr-L(e)         | L-Threonine exchange                                        |
| 432    | 1621       | EX_thym(e)          | Thymine exchange                                            |
| 433    | 858        | EX_thymd(e)         | Thymidine exchange                                          |
| 434    | 12529      | EX_thyox-L(e)       | L-Thyroxine exchange                                        |
| 435    | 12530      | EX_tmndnc(e)        | timnodonic acid exchange                                    |
| 436    | 20418      | EX_tolbutamide(e)   | tolbutamide exchange                                        |
| 437    | 721        | EX_tre(e)           | Trehalose exchange                                          |
| 438    | 12531      | EX_triodythy(e)     | Triiodothyronine exchange                                   |
| 439    | 19508      | EX_triodythysuf(e)  | Triiodothyronine sulfate exchange                           |
| 440    | 1076       | EX_trp-L(e)         | L-Tryptophan exchange                                       |
| 441    | 20423      | EX_tststeroneglc(e) | testosterone glucuronide exchange                           |
| 442    | 20424      | EX_tststerones(e)   | testosterone sulfate exchange                               |
| 443    | 2635       | EX_tsul(e)          | Thiosulfate exchange                                        |
| 444    | 2037       | EX_ttdca(e)         | tetradecanoate (n-C14:0) exchange                           |
| 445    | 20426      | EX_txa2(e)          | Thromboxane A2 exchange                                     |
| 446    | 19509      | EX_tymsf(e)         | Tyramine O-sulfate exchange                                 |
| 447    | 859        | EX_tyr-L(e)         | L-Tyrosine exchange                                         |
| 448    | 11257      | EX_udp(e)           | UDP exchange                                                |
| 449    | 10948      | EX_ump(e)           | UMP exchange                                                |
| 450    | 860        | EX_ura(e)           | Uracil exchange                                             |
| 451    | 19510      | EX_urate(e)         | Urate exchange                                              |
| 452    | 2925       | EX_urea(e)          | Urea exchange                                               |
| 453    | 861        | EX_uri(e)           | Uridine exchange                                            |
| 454    | 11258      | EX_utp(e)           | UTP exchange                                                |
| 455    | 12532      | EX_vacc(e)          | vaccenic acid exchange                                      |
| 456    | 862        | EX_val-L(e)         | L-Valine exchange                                           |
| 457    | 11648      | EX_vitd2(e)         | Vitamin D2 exchange                                         |
| 458    | 11649      | EX_vitd3(e)         | Vitamin D3 exchange                                         |
| 459    | 20438      | EX_whddca(e)        | omega hydroxy dodecanoate (n-C12:0) exchange                |

| Column | Reaction # | Abbreviation               | Reaction Name                                   |
|--------|------------|----------------------------|-------------------------------------------------|
| 460    | 20439      | EX_whhdca(e)               | omega hydroxy hexadecanoate (n-C16:0) exchange  |
| 461    | 20440      | EX_whtststerone(e)         | w hydroxy testosterone exchange                 |
| 462    | 20441      | EX_whtttdca(e)             | omega hydroxy tetradecanoate (n-C14:0) exchange |
| 463    | 14825      | EX_xolest2_hs(e)           | cholesterol ester (from FULLR2) exchange        |
| 464    | 14826      | EX_xolest_hs(e)            | cholesterol ester exchange                      |
| 465    | 20443      | EX_xoltri24(e)             | 7-alpha,24(S)-Dihydroxycholesterol exchange     |
| 466    | 20444      | EX_xoltri25(e)             | 7-alpha,25-Dihydroxycholesterol exchange        |
| 467    | 20445      | EX_xoltri27(e)             | 7-alpha,27-Dihydroxycholesterol exchange        |
| 468    | 684        | EX_xyl-D(e)                | D-Xylose exchange                               |
| 469    | 4145       | EX_xylt(e)                 | Xylitol exchange                                |
| 470    | 11650      | EX_yvite(e)                | gamma-Tocopherol exchange                       |
| 471    | 3153       | IN_glc(er)                 | IN_glc(er)                                      |
| 472    | 3158       | IN_glc(g)                  | IN_glc                                          |
| 473    | 6061       | sink_10fthf                | sink_10fthf                                     |
| 474    | 14185      | sink_12ppd-S(c)            | sink_12ppd-S(c)                                 |
| 475    | 13461      | sink_2amac(c)              | sink_2amac(c)                                   |
| 476    | 10599      | sink_2dr1p(c)              | sink_2dr1p(c)                                   |
| 477    | 6027       | sink_2obut(c)              | sink_2obut(c)                                   |
| 478    | 14024      | sink_2pg(c)                | sink_2pg(c)                                     |
| 479    | 13479      | sink_34dhoxpeg             | sink_34dhoxpeg                                  |
| 480    | 13462      | sink_34hpp                 | sink_34hpp                                      |
| 481    | 14235      | sink_3aib(m)               | sink_3aib(m)                                    |
| 482    | 12688      | sink_3mla                  | sink_3mla                                       |
| 483    | 978        | sink_3pg(c)                | sink_3pg(c)                                     |
| 484    | 12760      | sink_4abut                 | sink_4abut                                      |
| 485    | 13475      | sink_4hphac(c)             | sink_4hphac(c)                                  |
| 486    | 13919      | sink_4hpro-LT(m)           | sink_4hpro-LT(m)                                |
| 487    | 14109      | sink_5aop(c)               | sink_5aop(c)                                    |
| 488    | 12232      | sink_5forthf(c)            | 5forthf sink                                    |
| 489    | 13445      | sink_5moxact(c)            | sink_5moxact(c)                                 |
| 490    | 12825      | sink_5mta(c)               | sink_5mta(c)                                    |
| 491    | 13446      | sink_6hoxmelatn(c)         | sink_6hoxmelatn(c)                              |
| 492    | 14796      | sink_Asn-X-Ser/Thr(ly)     | sink_Asn-X-Ser/Thr(ly)                          |
| 493    | 14733      | sink_Asn-X-Ser/Thr(r)      | sink_Asn-X-Ser/Thr(r)                           |
| 494    | 13420      | sink_Lcyst(c)              | sink_Lcyst(c)                                   |
| 495    | 13499      | sink_Lcystin(c)            | sink_Lcystin(c)                                 |
| 496    | 13442      | sink_Lfmkynr(c)            | sink_Lfmkynr(c)                                 |
| 497    | 13443      | sink_Lkynr(c)              | sink_Lkynr(c)                                   |
| 498    | 13333      | sink_Rtotal(c)             | sink_Rtotal(c)                                  |
| 499    | 13370      | sink_Rtotal2(c)            | sink_Rtotal2(c)                                 |
| 500    | 13374      | sink_Rtotal3(c)            | sink_Rtotal3(c)                                 |
| 501    | 14934      | sink_Ser-Gly/Ala-X-Gly(er) | sink_Ser-Gly/Ala-X-Gly(er)                      |
| 502    | 15014      | sink_Ser-Gly/Ala-X-Gly(ly) | sink_Ser-Gly/Ala-X-Gly(ly)                      |
| 503    | 14804      | sink_Ser/Thr(g)            | sink_Ser/Thr(g)                                 |
| 504    | 15030      | sink_Ser/Thr(ly)           | sink_Ser/Thr(ly)                                |
| 505    | 13699      | sink_Tyr-ggn               | sink_Tyr-ggn                                    |
| 506    | 14092      | sink_aact(c)               | sink_aact(c)                                    |
| 507    | 1291       | sink_ac(c)                 | sink_ac(c)                                      |
| 508    | 14970      | sink_ac(g)                 | sink_ac(g)                                      |
| 509    | 5808       | sink_acac(c)               | sink_acac(c)                                    |
| 510    | 13452      | sink_acac(m)               | sink_acac(m)                                    |
| 511    | 13357      | sink_acald(c)              | Acetaldehyde exchange                           |
| 512    | 3815       | sink_accoa(c)              | sink_accoa(c)                                   |
| 513    | 15017      | sink_accoa(ly)             | sink_accoa(ly)                                  |
| 514    | 4300       | sink_accoa(m)              | sink_accoa(m)                                   |
| 515    | 15138      | sink_accoa(x)              | sink_accoa(x)                                   |

| Column | Reaction # | Abbreviation                | Reaction Name               |
|--------|------------|-----------------------------|-----------------------------|
| 516    | 14091      | sink_acetone(c)             | sink_acetone(c)             |
| 517    | 14201      | sink_acetone(m)             | sink_acetone(m)             |
| 518    | 13349      | sink_acgagbside_hs(g)       | sink_acgagbside_hs(g)       |
| 519    | 13735      | sink_acgal(c)               | sink_acgal(c)               |
| 520    | 15023      | sink_acgal(ly)              | sink_acgal(ly)              |
| 521    | 13740      | sink_acgam                  | sink_acgam                  |
| 522    | 14798      | sink_acgam(ly)              | sink_acgam(ly)              |
| 523    | 13352      | sink_acnacngalgsbside_hs(g) | sink_acnacngalgsbside_hs(g) |
| 524    | 14799      | sink_acnam(ly)              | sink_acnam(ly)              |
| 525    | 13869      | sink_acorn(c)               | sink_acorn(c)               |
| 526    | 6032       | sink_ade(c)                 | sink_ade(c)                 |
| 527    | 6066       | sink_adn(c)                 | sink_adn(c)                 |
| 528    | 888        | sink_adp(c)                 | sink_adp(c)                 |
| 529    | 965        | sink_adp(m)                 | sink_adp(m)                 |
| 530    | 13246      | sink_adp(x)                 | sink_adp(x)                 |
| 531    | 13465      | sink_adrml(c)               | sink_adrml(c)               |
| 532    | 12759      | sink_agm(c)                 | sink_agm(c)                 |
| 533    | 7791       | sink_ahcys(c)               | sink_ahcys(c)               |
| 534    | 14232      | sink_ahcys(m)               | sink_ahcys(m)               |
| 535    | 4622       | sink_akg(c)                 | sink_akg(c)                 |
| 536    | 967        | sink_akg(m)                 | sink_akg(m)                 |
| 537    | 15136      | sink_akg(x)                 | sink_akg(x)                 |
| 538    | 12821      | sink_ala-B(c)               | sink_ala-B(c)               |
| 539    | 12862      | sink_ala-D(c)               | sink_ala-D(c)               |
| 540    | 14027      | sink_ala-D(x)               | sink_ala-D(x)               |
| 541    | 7980       | sink_ala-L(c)               | sink_ala-L(c)               |
| 542    | 14032      | sink_ala-L(x)               | sink_ala-L(x)               |
| 543    | 924        | sink_alac-S(c)              | sink_alac-S(c)              |
| 544    | 4932       | sink_amet                   | sink_amet                   |
| 545    | 14231      | sink_amet(m)                | sink_amet(m)                |
| 546    | 12823      | sink_ametam                 | sink_ametam                 |
| 547    | 1131       | sink_amp(c)                 | sink_amp(c)                 |
| 548    | 4292       | sink_amp(m)                 | sink_amp(m)                 |
| 549    | 13764      | sink_amp(r)                 | sink_amp(r)                 |
| 550    | 13278      | sink_amp(x)                 | sink_amp(x)                 |
| 551    | 13453      | sink_anth(c)                | sink_anth(c)                |
| 552    | 14741      | sink_arachd(c)              | sink_arachd(c)              |
| 553    | 13366      | sink_arachd(er)             | sink_arachd(er)             |
| 554    | 7982       | sink_arg(c)                 | sink_arg(c)                 |
| 555    | 12743      | sink_arg(m)                 | sink_arg(m)                 |
| 556    | 13633      | sink_ascb-L(c)              | L-Ascorbate sink            |
| 557    | 7983       | sink_asn(c)                 | sink_asn(c)                 |
| 558    | 4625       | sink_asp(c)                 | sink_asp(c)                 |
| 559    | 12861      | sink_asp(m)                 | sink_asp(m)                 |
| 560    | 933        | sink_atp(c)                 | sink_atp(c)                 |
| 561    | 13104      | sink_atp(m)                 | sink_atp(m)                 |
| 562    | 13762      | sink_atp(r)                 | sink_atp(r)                 |
| 563    | 13245      | sink_atp(x)                 | sink_atp(x)                 |
| 564    | 13319      | sink_betald(m)              | sink_betald(m)              |
| 565    | 14203      | sink_bhb(m)                 | sink_bhb(m)                 |
| 566    | 14195      | sink_bilirub(c)             | sink_bilirub(c)             |
| 567    | 13760      | sink_bz(r)                  | sink_bz(r)                  |
| 568    | 12843      | sink_carn(c)                | sink_carn(c)                |
| 569    | 14136      | sink_cdp(c)                 | sink_cdp(c)                 |
| 570    | 13789      | sink_cdpdag(c)              | sink_cdpdag(c)              |

| Column | Reaction # | Abbreviation      | Reaction Name     |
|--------|------------|-------------------|-------------------|
| 571    | 13096      | sink_chol(c)      | sink_chol(c)      |
| 572    | 13320      | sink_chol(m)      | sink_chol(m)      |
| 573    | 13421      | sink_cholcoa(x)   | sink_cholcoa(x)   |
| 574    | 14746      | sink_chsterol(c)  | sink_chsterol(c)  |
| 575    | 13263      | sink_chsterol(r)  | sink_chsterol(r)  |
| 576    | 14190      | sink_citr(c)      | sink_citr(c)      |
| 577    | 4024       | sink_cmp(c)       | sink_cmp(c)       |
| 578    | 13343      | sink_cmp(g)       | sink_cmp(g)       |
| 579    | 13741      | sink_cmpacna(c)   | sink_cmpacna(c)   |
| 580    | 13345      | sink_cmpacna(g)   | sink_cmpacna(g)   |
| 581    | 14197      | sink_co(c)        | sink_co(c)        |
| 582    | 1289       | sink_co2(c)       | sink_co2(c)       |
| 583    | 7817       | sink_co2(m)       | sink_co2(m)       |
| 584    | 13258      | sink_co2(r)       | sink_co2(r)       |
| 585    | 13247      | sink_co2(x)       | sink_co2(x)       |
| 586    | 922        | sink_coa(c)       | sink_coa(c)       |
| 587    | 15018      | sink_coa(ly)      | sink_coa(ly)      |
| 588    | 964        | sink_coa(m)       | sink_coa(m)       |
| 589    | 13763      | sink_coa(r)       | sink_coa(r)       |
| 590    | 13251      | sink_coa(x)       | sink_coa(x)       |
| 591    | 13758      | sink_coke(r)      | sink_coke(r)      |
| 592    | 14809      | sink_core2(g)     | sink_core2(g)     |
| 593    | 14810      | sink_core4(g)     | sink_core4(g)     |
| 594    | 13486      | sink_creat(c)     | sink_creat(c)     |
| 595    | 13335      | sink_crmp_hs(c)   | sink_crmp_hs(c)   |
| 596    | 4291       | sink_crn(c)       | sink_crn(c)       |
| 597    | 14739      | sink_crn(m)       | sink_crn(m)       |
| 598    | 15139      | sink_crn(x)       | sink_crn(x)       |
| 599    | 14938      | sink_cs_pre(g)    | sink_cs_pre(g)    |
| 600    | 14941      | sink_cspg_a(g)    | sink_cspg_a(g)    |
| 601    | 15022      | sink_cspg_a(ly)   | sink_cspg_a(ly)   |
| 602    | 14942      | sink_cspg_b(g)    | sink_cspg_b(g)    |
| 603    | 15024      | sink_cspg_b(ly)   | sink_cspg_b(ly)   |
| 604    | 14943      | sink_cspg_c(g)    | sink_cspg_c(g)    |
| 605    | 15025      | sink_cspg_c(ly)   | sink_cspg_c(ly)   |
| 606    | 14944      | sink_cspg_d(g)    | sink_cspg_d(g)    |
| 607    | 15026      | sink_cspg_d(ly)   | sink_cspg_d(ly)   |
| 608    | 14945      | sink_cspg_e(g)    | sink_cspg_e(g)    |
| 609    | 15027      | sink_cspg_e(ly)   | sink_cspg_e(ly)   |
| 610    | 1915       | sink_ctp(c)       | sink_ctp(c)       |
| 611    | 7986       | sink_cys-L(c)     | L-Cys sink        |
| 612    | 14115      | sink_cytd(c)      | sink_cytd(c)      |
| 613    | 13332      | sink_dag_hs(c)    | sink_dag_hs(c)    |
| 614    | 14830      | sink_dag_hs(er)   | sink_dag_hs(er)   |
| 615    | 14118      | sink_dcmp(c)      | sink_dcmp(c)      |
| 616    | 14229      | sink_decdp(m)     | sink_decdp(m)     |
| 617    | 14026      | sink_dhap(c)      | sink_dhap(c)      |
| 618    | 13180      | sink_dhbpt(c)     | sink_dhbpt(c)     |
| 619    | 5085       | sink_dhf(c)       | sink_dhf(c)       |
| 620    | 15134      | sink_dmhptcoa(m)  | sink_dmhptcoa(m)  |
| 621    | 15142      | sink_dmnoncoa(m)  | sink_dmnoncoa(m)  |
| 622    | 15141      | sink_dmnoncoa(x)  | sink_dmnoncoa(x)  |
| 623    | 13745      | sink_dmpp         | sink_dmpp         |
| 624    | 13309      | sink_dna(n)       | sink_dna(n)       |
| 625    | 13310      | sink_dna5mtc(n)   | sink_dna5mtc(n)   |
| 626    | 14727      | sink_dolglcp_U(g) | sink_dolglcp_U(g) |

| Column | Reaction # | Abbreviation           | Reaction Name          |
|--------|------------|------------------------|------------------------|
| 627    | 14719      | sink_dolichol_L(c)     | sink_dolichol_L(c)     |
| 628    | 14718      | sink_dolichol_U(c)     | sink_dolichol_U(c)     |
| 629    | 14720      | sink_dolmanp_L(c)      | sink_dolmanp_L(c)      |
| 630    | 14721      | sink_dolmanp_L(r)      | sink_dolmanp_L(r)      |
| 631    | 14722      | sink_dolmanp_U(r)      | sink_dolmanp_U(r)      |
| 632    | 14729      | sink_dolp_U(g)         | sink_dolp_U(g)         |
| 633    | 14732      | sink_dolp_U(r)         | sink_dolp_U(r)         |
| 634    | 13476      | sink_dopa(c)           | sink_dopa(c)           |
| 635    | 14807      | sink_dsT_antigen(g)    | sink_dsT_antigen(g)    |
| 636    | 13744      | sink_dtdprmn(c)        | sink_dtdprmn(c)        |
| 637    | 14123      | sink_dtmp(c)           | sink_dtmp(c)           |
| 638    | 13311      | sink_dtt(c)            | sink_dtt(c)            |
| 639    | 13312      | sink_dttOX(c)          | sink_dttOX(c)          |
| 640    | 7991       | sink_dttp(c)           | sink_dttp(c)           |
| 641    | 14119      | sink_dump(c)           | sink_dump(c)           |
| 642    | 13641      | sink_eryth             | sink_eryth             |
| 643    | 1272       | sink_etha              | ethanolamine sink      |
| 644    | 13356      | sink_etoh(c)           | Ethanol exchange       |
| 645    | 13449      | sink_f5hoxkyn(c)       | sink_f5hoxkyn(c)       |
| 646    | 1135       | sink_f6p(c)            | sink_f6p(c)            |
| 647    | 4305       | sink_fad(c)            | sink_fad(c)            |
| 648    | 4296       | sink_fad(m)            | sink_fad(m)            |
| 649    | 13262      | sink_fad(r)            | sink_fad(r)            |
| 650    | 13286      | sink_fad(x)            | sink_fad(x)            |
| 651    | 4303       | sink_fadh2(c)          | sink_fadh2(c)          |
| 652    | 4295       | sink_fadh2(m)          | sink_fadh2(m)          |
| 653    | 13261      | sink_fadh2(r)          | sink_fadh2(r)          |
| 654    | 13285      | sink_fadh2(x)          | sink_fadh2(x)          |
| 655    | 13485      | sink_fald(c)           | sink_fald(c)           |
| 656    | 13324      | sink_fald(m)           | sink_fald(m)           |
| 657    | 14194      | sink_fe2(c)            | sink_fe2(c)            |
| 658    | 14113      | sink_fe2(m)            | sink_fe2(m)            |
| 659    | 4307       | sink_ficytc(m)         | sink_ficytc(m)         |
| 660    | 13447      | sink_fna5moxam(c)      | sink_fna5moxam(c)      |
| 661    | 4309       | sink_focytc(m)         | sink_focytc(m)         |
| 662    | 13259      | sink_for(r)            | sink_for(r)            |
| 663    | 14717      | sink_frdp(c)           | sink_frdp(c)           |
| 664    | 13249      | sink_frdp(x)           | sink_frdp(x)           |
| 665    | 13500      | sink_fru(c)            | D-Fructose sink        |
| 666    | 5827       | sink_fuc-L             | sink_fuc-L             |
| 667    | 14795      | sink_fuc-L(ly)         | sink_fuc-L(ly)         |
| 668    | 5027       | sink_fum               | sink_fum               |
| 669    | 966        | sink_fum(m)            | sink_fum(m)            |
| 670    | 1455       | sink_glp(c)            | glp Input              |
| 671    | 14784      | sink_g3m8mpdol_L(r)    | sink_g3m8mpdol_L(r)    |
| 672    | 14726      | sink_g3m8mpdol_U(g)    | sink_g3m8mpdol_U(g)    |
| 673    | 14730      | sink_g3m8mpdol_U(r)    | sink_g3m8mpdol_U(r)    |
| 674    | 977        | sink_g3p(c)            | sink_g3p(c)            |
| 675    | 959        | sink_g6p(c)            | sink_g6p(c)            |
| 676    | 13380      | sink_g6p(r)            | sink_g6p(r)            |
| 677    | 14828      | sink_gacpail_hs(c)     | sink_gacpail_hs(c)     |
| 678    | 5749       | sink_gal(c)            | sink_gal(c)            |
| 679    | 14800      | sink_gal(ly)           | sink_gal(ly)           |
| 680    | 13351      | sink_galgaltherm_hs(g) | sink_galgaltherm_hs(g) |
| 681    | 13337      | sink_galgluside_hs(g)  | sink_galgluside_hs(g)  |
| 682    | 13733      | sink_gam6p(c)          | sink_gam6p(c)          |

| Column | Reaction # | Abbreviation         | Reaction Name             |
|--------|------------|----------------------|---------------------------|
| 683    | 13282      | sink_gchola(x)       | sink_gchola(x)            |
| 684    | 13348      | sink_gd1b2_hs(g)     | sink_gd1b2_hs(g)          |
| 685    | 13346      | sink_gd1c_hs(g)      | sink_gd1c_hs(g)           |
| 686    | 4079       | sink_gdp(c)          | sink_gdp(c)               |
| 687    | 14790      | sink_gdp(g)          | sink_gdp(g)               |
| 688    | 4080       | sink_gdp(m)          | sink_gdp(m)               |
| 689    | 13728      | sink_gdpfuc(c)       | sink_gdpfuc(c)            |
| 690    | 14789      | sink_gdpfuc(g)       | sink_gdpfuc(g)            |
| 691    | 13727      | sink_gdpmann(c)      | sink_gdpmann(c)           |
| 692    | 13746      | sink_ggdp            | sink_ggdp                 |
| 693    | 15020      | sink_glcu(ly)        | sink_glcu(ly)             |
| 694    | 13168      | sink_gln-D(m)        | sink_gln-D(m)             |
| 695    | 7993       | sink_gln-L(c)        | sink_gln-L(c)             |
| 696    | 12864      | sink_gln-L(m)        | sink_gln-L(m)             |
| 697    | 13169      | sink_glu-D(m)        | sink_glu-D(m)             |
| 698    | 4547       | sink_glu-L(c)        | sink_glu-L(c)             |
| 699    | 12712      | sink_glu-L(m)        | sink_glu-L(m)             |
| 700    | 13488      | sink_glu5sa(c)       | sink_glu5sa(c)            |
| 701    | 13353      | sink_gluside_hs(g)   | sink_gluside_hs(g)        |
| 702    | 14033      | sink_glx(c)          | sink_glx(c)               |
| 703    | 13920      | sink_glx(m)          | sink_glx(m)               |
| 704    | 14031      | sink_glx(x)          | sink_glx(x)               |
| 705    | 7994       | sink_gly(c)          | sink_gly(c)               |
| 706    | 13290      | sink_gly(m)          | sink_gly(m)               |
| 707    | 13281      | sink_gly(x)          | sink_gly(x)               |
| 708    | 13373      | sink_glyc(c)         | sink_glyc(c)              |
| 709    | 4001       | sink_glyc(m)         | sink_glyc(m)              |
| 710    | 14037      | sink_glyc-S(c)       | sink_glyc-S(c)            |
| 711    | 13393      | sink_glyc3p(c)       | Glycerol 3-phosphate sink |
| 712    | 8275       | sink_glyclt(c)       | sink_glyclt(c)            |
| 713    | 14036      | sink_glyclt(m)       | sink_glyclt(m)            |
| 714    | 13700      | sink_glygn2(c)       | sink_glygn2(c)            |
| 715    | 13347      | sink_gp1c_hs(g)      | sink_gp1c_hs(g)           |
| 716    | 14833      | sink_gpi_prot_hs(er) | sink_gpi_prot_hs(er)      |
| 717    | 14832      | sink_gpi_sig(er)     | sink_gpi_sig(er)          |
| 718    | 13339      | sink_gq1balpha_hs(g) | sink_gq1balpha_hs(g)      |
| 719    | 14093      | sink_gsn(c)          | sink_gsn(c)               |
| 720    | 13177      | sink_gthox(c)        | sink_gthox(c)             |
| 721    | 13176      | sink_gthrd(c)        | sink_gthrd(c)             |
| 722    | 1916       | sink_gtp(c)          | sink_gtp(c)               |
| 723    | 4082       | sink_gtp(m)          | sink_gtp(m)               |
| 724    | 5131       | sink_gua(c)          | sink_gua(c)               |
| 725    | 934        | sink_h(c)            | sink_h(c)                 |
| 726    | 2162       | sink_h(er)           | sink_h(er)                |
| 727    | 2164       | sink_h(g)            | sink_h(g)                 |
| 728    | 15012      | sink_h(ly)           | sink_h(ly)                |
| 729    | 1004       | sink_h(m)            | sink_h(m)                 |
| 730    | 2163       | sink_h(n)            | sink_h(n)                 |
| 731    | 2161       | sink_h(p)            | sink_h(p)                 |
| 732    | 1877       | sink_h2o(c)          | sink_h2o(c)               |
| 733    | 1302       | sink_h2o(g)          | sink_h2o(g)               |
| 734    | 14794      | sink_h2o(ly)         | sink_h2o(ly)              |
| 735    | 4301       | sink_h2o(m)          | sink_h2o(m)               |
| 736    | 13253      | sink_h2o(r)          | sink_h2o(r)               |
| 737    | 12941      | sink_h2o(x)          | sink_h2o(x)               |
| 738    | 8600       | sink_h2o2(c)         | sink_h2o2(c)              |

| Column | Reaction # | Abbreviation        | Reaction Name       |
|--------|------------|---------------------|---------------------|
| 739    | 14105      | sink_h2o2(m)        | sink_h2o2(m)        |
| 740    | 12944      | sink_h2o2(x)        | sink_h2o2(x)        |
| 741    | 14933      | sink_ha(ly)         | sink_ha(ly)         |
| 742    | 911        | sink_hco3(c)        | sink_hco3(c)        |
| 743    | 12784      | sink_hco3(m)        | sink_hco3(m)        |
| 744    | 5781       | sink_hcys-L         | sink_hcys-L         |
| 745    | 13301      | sink_hcys-L(c)      | sink_hcys-L(c)      |
| 746    | 13368      | sink_hemeBo(er)     | sink_hemeBo(er)     |
| 747    | 13369      | sink_hemeBr(er)     | sink_hemeBr(er)     |
| 748    | 13459      | sink_hi(c)          | sink_hi(c)          |
| 749    | 7996       | sink_his-L          | sink_his-L          |
| 750    | 12686      | sink_hista          | sink_hista          |
| 751    | 13250      | sink_hmgcoa(x)      | sink_hmgcoa(x)      |
| 752    | 13478      | sink_homoval(c)     | sink_homoval(c)     |
| 753    | 14023      | sink_hpyr(c)        | sink_hpyr(c)        |
| 754    | 14969      | sink_hspg(g)        | sink_hspg(g)        |
| 755    | 15011      | sink_hspg(ly)       | sink_hspg(ly)       |
| 756    | 5133       | sink_hxan(c)        | sink_hxan(c)        |
| 757    | 13418      | sink_hyptaur(c)     | sink_hyptaur(c)     |
| 758    | 13451      | sink_id3acald(c)    | sink_id3acald(c)    |
| 759    | 15015      | sink_idour(ly)      | sink_idour(ly)      |
| 760    | 13457      | sink_ile(m)         | sink_ile(m)         |
| 761    | 12687      | sink_im4ac          | sink_im4ac          |
| 762    | 6062       | sink_imp            | sink_imp            |
| 763    | 13371      | sink_inost(c)       | sink_inost(c)       |
| 764    | 13458      | sink_iodine(c)      | sink_iodine(c)      |
| 765    | 13747      | sink_ipdp           | sink_ipdp           |
| 766    | 13750      | sink_ipdp(x)        | sink_ipdp(x)        |
| 767    | 13792      | sink_itacon(m)      | sink_itacon(m)      |
| 768    | 13725      | sink_kdn(c)         | sink_kdn(c)         |
| 769    | 14948      | sink_ksi(g)         | sink_ksi(g)         |
| 770    | 15028      | sink_ksi(ly)        | sink_ksi(ly)        |
| 771    | 14946      | sink_ksii_core2(g)  | sink_ksii_core2(g)  |
| 772    | 15029      | sink_ksii_core2(ly) | sink_ksii_core2(ly) |
| 773    | 14947      | sink_ksii_core4(g)  | sink_ksii_core4(g)  |
| 774    | 15033      | sink_ksii_core4(ly) | sink_ksii_core4(ly) |
| 775    | 13454      | sink_kynate(c)      | sink_kynate(c)      |
| 776    | 14788      | sink_l2fn2m2masn(g) | sink_l2fn2m2masn(g) |
| 777    | 10522      | sink_lac-D          | D-lactate sink      |
| 778    | 13518      | sink_lcts(g)        | sink_lcts(g)        |
| 779    | 13450      | sink_leu(m)         | sink_leu(m)         |
| 780    | 8000       | sink_lys(c)         | sink_lys(c)         |
| 781    | 12949      | sink_lys(x)         | sink_lys(x)         |
| 782    | 13642      | sink_lyxnt(c)       | sink_lyxnt(c)       |
| 783    | 14725      | sink_m4mpdol_U(c)   | sink_m4mpdol_U(c)   |
| 784    | 14724      | sink_m8masn(g)      | sink_m8masn(g)      |
| 785    | 14772      | sink_m8masn(r)      | sink_m8masn(r)      |
| 786    | 4623       | sink_mal(c)         | sink_mal(c)         |
| 787    | 14740      | sink_malcoa(m)      | sink_malcoa(m)      |
| 788    | 13726      | sink_man(c)         | sink_man(c)         |
| 789    | 14787      | sink_man(g)         | sink_man(g)         |
| 790    | 13724      | sink_man6p(c)       | sink_man6p(c)       |
| 791    | 13466      | sink_melanin(c)     | sink_melanin(c)     |
| 792    | 13441      | sink_melatn(c)      | sink_melatn(c)      |
| 793    | 13761      | sink_meoh(r)        | sink_meoh(r)        |
| 794    | 13793      | sink_mescon(m)      | sink_mescon(m)      |



| Column | Reaction # | Abbreviation       | Reaction Name      |
|--------|------------|--------------------|--------------------|
| 795    | 5782       | sink_met(c)        | sink_met(c)        |
| 796    | 13791      | sink_mi145p(c)     | sink_mi145p(c)     |
| 797    | 6064       | sink_mlthf(c)      | sink_mlthf(c)      |
| 798    | 13296      | sink_mlthf(m)      | sink_mlthf(m)      |
| 799    | 13480      | sink_mma(c)        | sink_mma(c)        |
| 800    | 12847      | sink_msa(c)        | sink_msa(c)        |
| 801    | 20459      | sink_msa(m)        | sink_msa(m)        |
| 802    | 14090      | sink_mthgxl(c)     | sink_mthgxl(c)     |
| 803    | 14792      | sink_n2m2nmasn(g)  | sink_n2m2nmasn(g)  |
| 804    | 14803      | sink_n2m2nmasn(ly) | sink_n2m2nmasn(ly) |
| 805    | 13419      | sink_na1(x)        | sink_na1(x)        |
| 806    | 4071       | sink_nad(c)        | sink_nad(c)        |
| 807    | 1575       | sink_nad(m)        | sink_nad(m)        |
| 808    | 13254      | sink_nad(r)        | sink_nad(r)        |
| 809    | 12945      | sink_nad(x)        | sink_nad(x)        |
| 810    | 1965       | sink_nadh(c)       | sink_nadh(c)       |
| 811    | 4075       | sink_nadh(m)       | sink_nadh(m)       |
| 812    | 13255      | sink_nadh(r)       | sink_nadh(r)       |
| 813    | 12946      | sink_nadh(x)       | sink_nadh(x)       |
| 814    | 1132       | sink_nadp(c)       | nadp sink          |
| 815    | 4921       | sink_nadp(m)       | nadph sink         |
| 816    | 13257      | sink_nadp(r)       | nadp sink          |
| 817    | 13248      | sink_nadp(x)       | nadph sink         |
| 818    | 1133       | sink_nadph(c)      | nadph sink         |
| 819    | 4920       | sink_nadph(m)      | nadph sink         |
| 820    | 13256      | sink_nadph(r)      | nadph sink         |
| 821    | 13242      | sink_nadph(x)      | nadph sink         |
| 822    | 13444      | sink_nformanth(c)  | sink_nformanth(c)  |
| 823    | 12923      | sink_nh3(m)        | sink_nh3(m)        |
| 824    | 12943      | sink_nh3(x)        | sink_nh3(x)        |
| 825    | 1292       | sink_nh4(c)        | sink_nh4(c)        |
| 826    | 14785      | sink_nm4masn(g)    | sink_nm4masn(g)    |
| 827    | 13448      | sink_nmthsrtm(c)   | sink_nmthsrtm(c)   |
| 828    | 12762      | sink_no(c)         | sink_no(c)         |
| 829    | 13464      | sink_nrpplr(c)     | sink_nrpplr(c)     |
| 830    | 7977       | sink_o2(c)         | sink_o2(c)         |
| 831    | 13237      | sink_o2(m)         | sink_o2(m)         |
| 832    | 13260      | sink_o2(r)         | sink_o2(r)         |
| 833    | 12940      | sink_o2(x)         | sink_o2(x)         |
| 834    | 13640      | sink_o2s(c)        | sink_o2s(c)        |
| 835    | 4925       | sink_o2s(m)        | sink_o2s(m)        |
| 836    | 4076       | sink_oaa(c)        | sink_oaa(c)        |
| 837    | 980        | sink_oaa(m)        | sink_oaa(m)        |
| 838    | 14073      | sink_oh1           | OH1 sink           |
| 839    | 14074      | sink_oh1(m)        | OH1 sink           |
| 840    | 1700       | sink_orn(c)        | sink_orn(c)        |
| 841    | 13635      | sink_oxa(c)        | sink_oxa(c)        |
| 842    | 13201      | sink_pac(c)        | sink_pac(c)        |
| 843    | 13198      | sink_pacald(c)     | sink_pacald(c)     |
| 844    | 13372      | sink_pail45p_hs(c) | sink_pail45p_hs(c) |
| 845    | 13790      | sink_pail4p_hs(c)  | sink_pail4p_hs(c)  |
| 846    | 13787      | sink_pail_hs(c)    | sink_pail_hs(c)    |
| 847    | 14940      | sink_pap(g)        | sink_pap(g)        |
| 848    | 14099      | sink_paps(c)       | sink_paps(c)       |
| 849    | 14939      | sink_paps(g)       | sink_paps(g)       |
| 850    | 13331      | sink_pchol_hs(c)   | sink_pchol_hs(c)   |

| Column | Reaction # | Abbreviation           | Reaction Name          |
|--------|------------|------------------------|------------------------|
| 851    | 13487      | sink_pcreat(c)         | sink_pcreat(c)         |
| 852    | 13376      | sink_pe_hs(c)          | sink_pe_hs(c)          |
| 853    | 14829      | sink_pe_hs(er)         | sink_pe_hs(er)         |
| 854    | 13192      | sink_peamn(c)          | sink_peamn(c)          |
| 855    | 13759      | sink_pegoncoa(r)       | sink_pegoncoa(r)       |
| 856    | 979        | sink_pep(c)            | sink_pep(c)            |
| 857    | 13202      | sink_phaccoa(c)        | sink_phaccoa(c)        |
| 858    | 8004       | sink_phe-L(c)          | sink_phe-L(c)          |
| 859    | 13191      | sink_pheacgln(c)       | sink_pheacgln(c)       |
| 860    | 14196      | sink_pheme(c)          | sink_pheme(c)          |
| 861    | 14110      | sink_pheme(m)          | sink_pheme(m)          |
| 862    | 13185      | sink_phpyr(c)          | sink_phpyr(c)          |
| 863    | 15135      | sink_phytcoa(c)        | sink_phytcoa(c)        |
| 864    | 932        | sink_pi(c)             | sink_pi(c)             |
| 865    | 13325      | sink_pi(er)            | sink_pi(er)            |
| 866    | 7816       | sink_pi(m)             | sink_pi(m)             |
| 867    | 13243      | sink_pi(x)             | sink_pi(x)             |
| 868    | 920        | sink_pmtcoa(c)         | sink_pmtcoa(c)         |
| 869    | 13298      | sink_ppcoa(c)          | sink_ppcoa(c)          |
| 870    | 13460      | sink_ppcoa(m)          | sink_ppcoa(m)          |
| 871    | 13365      | sink_ppcoa(x)          | sink_ppcoa(x)          |
| 872    | 931        | sink_ppi(c)            | sink_ppi(c)            |
| 873    | 4310       | sink_ppi(m)            | sink_ppi(m)            |
| 874    | 13264      | sink_ppi(r)            | sink_ppi(r)            |
| 875    | 13244      | sink_ppi(x)            | sink_ppi(x)            |
| 876    | 14831      | sink_pre_prot(er)      | sink_pre_prot(er)      |
| 877    | 8006       | sink_pro-L(c)          | sink_pro-L(c)          |
| 878    | 12740      | sink_pro-L(m)          | sink_pro-L(m)          |
| 879    | 1963       | sink_prpp(c)           | sink_prpp(c)           |
| 880    | 8008       | sink_ptrc(c)           | sink_ptrc(c)           |
| 881    | 14573      | sink_pydx(c)           | sink_pydx(c)           |
| 882    | 1288       | sink_pyr(c)            | sink_pyr(c)            |
| 883    | 960        | sink_pyr(m)            | sink_pyr(m)            |
| 884    | 14028      | sink_pyr(x)            | sink_pyr(x)            |
| 885    | 14124      | sink_q10(c)            | sink_q10(c)            |
| 886    | 4286       | sink_q10(m)            | sink_q10(m)            |
| 887    | 14125      | sink_q10h2(m)          | sink_q10h2(m)          |
| 888    | 13172      | sink_quln              | sink_quln              |
| 889    | 13203      | sink_r1p               | sink_r1p               |
| 890    | 975        | sink_r5p(c)            | sink_r5p(c)            |
| 891    | 3657       | sink_ru5p-D            | sink_ru5p-D            |
| 892    | 14791      | sink_s2l2fn2m2masn(g)  | sink_s2l2fn2m2masn(g)  |
| 893    | 14793      | sink_s2l2fn2m2masn(ly) | sink_s2l2fn2m2masn(ly) |
| 894    | 14806      | sink_sT_antigen(g)     | sink_sT_antigen(g)     |
| 895    | 14808      | sink_sTn_antigen(g)    | sink_sTn_antigen(g)    |
| 896    | 12711      | sink_saccrp-L(m)       | sink_saccrp-L(m)       |
| 897    | 13416      | sink_seahcys(n)        | sink_seahcys(n)        |
| 898    | 13417      | sink_seasmet(n)        | sink_seasmet(n)        |
| 899    | 13305      | sink_selmeth(c)        | sink_selmeth(c)        |
| 900    | 13306      | sink_selnp(c)          | sink_selnp(c)          |
| 901    | 8009       | sink_ser-L(c)          | sink_ser-L(c)          |
| 902    | 1701       | sink_so4(c)            | sink_so4(c)            |
| 903    | 15013      | sink_so4(ly)           | sink_so4(ly)           |
| 904    | 13334      | sink_sphmyln_hs(c)     | sink_sphmyln_hs(c)     |
| 905    | 8010       | sink_spmc(c)           | sink_spmc(c)           |
| 906    | 12860      | sink_sprm(c)           | sink_sprm(c)           |

| Column | Reaction # | Abbreviation        | Reaction Name                              |
|--------|------------|---------------------|--------------------------------------------|
| 907    | 13751      | sink_sql(r)         | sink_sql(r)                                |
| 908    | 13440      | sink_srtn(c)        | sink_srtn(c)                               |
| 909    | 968        | sink_succ(m)        | sink_succ(m)                               |
| 910    | 15137      | sink_succ(x)        | sink_succ(x)                               |
| 911    | 981        | sink_succoa(m)      | sink_succoa(m)                             |
| 912    | 13375      | sink_tag_hs(c)      | sink_tag_hs(c)                             |
| 913    | 13280      | sink_taur(x)        | sink_taur(x)                               |
| 914    | 13283      | sink_tchola(x)      | sink_tchola(x)                             |
| 915    | 13179      | sink_thbpt(c)       | sink_thbpt(c)                              |
| 916    | 13277      | sink_thcholstoic(m) | sink_thcholstoic(m)                        |
| 917    | 13284      | sink_thcholstoic(x) | sink_thcholstoic(x)                        |
| 918    | 3821       | sink_thf(c)         | sink_thf(c)                                |
| 919    | 13295      | sink_thf(m)         | sink_thf(m)                                |
| 920    | 5903       | sink_thm(c)         | sink_thm(c)                                |
| 921    | 14075      | sink_thmmp(c)       | sink_thmmp(c)                              |
| 922    | 8012       | sink_thr-L(c)       | sink_thr-L(c)                              |
| 923    | 13634      | sink_thrnt(c)       | sink_thrnt(c)                              |
| 924    | 937        | sink_thym(c)        | sink_thym(c)                               |
| 925    | 13455      | sink_thyox-L(c)     | sink_thyox-L(c)                            |
| 926    | 10600      | sink_trdox(c)       | sink_trdox(c)                              |
| 927    | 10601      | sink_trdrd(c)       | sink_trdrd(c)                              |
| 928    | 13456      | sink_triodythy(c)   | sink_triodythy(c)                          |
| 929    | 8015       | sink_trp-L(c)       | sink_trp-L(c)                              |
| 930    | 13367      | sink_txa2(er)       | sink_txa2(er)                              |
| 931    | 8016       | sink_tyr-L(c)       | sink_tyr-L(c)                              |
| 932    | 14228      | sink_tyr-L(m)       | sink_tyr-L(m)                              |
| 933    | 5829       | sink_uacgam         | sink_uacgam                                |
| 934    | 14786      | sink_uacgam(g)      | sink_uacgam(g)                             |
| 935    | 13436      | sink_udp(c)         | sink_udp(c)                                |
| 936    | 14936      | sink_udp(er)        | sink_udp(er)                               |
| 937    | 13340      | sink_udp(g)         | sink_udp(g)                                |
| 938    | 15031      | sink_udp(ly)        | sink_udp(ly)                               |
| 939    | 13736      | sink_udpacgal(c)    | sink_udpacgal(c)                           |
| 940    | 13341      | sink_udpacgal(g)    | sink_udpacgal(g)                           |
| 941    | 15032      | sink_udpacgal(ly)   | sink_udpacgal(ly)                          |
| 942    | 5787       | sink_udpg(c)        | sink_udpg(c)                               |
| 943    | 13517      | sink_udpgal(c)      | sink_udpgal(c)                             |
| 944    | 13344      | sink_udpgal(g)      | sink_udpgal(g)                             |
| 945    | 10615      | sink_udpglcur(c)    | sink_udpglcur(c)                           |
| 946    | 14937      | sink_udpglcur(g)    | sink_udpglcur(g)                           |
| 947    | 14935      | sink_udpxyl(er)     | sink_udpxyl(er)                            |
| 948    | 10627      | sink_ump(c)         | sink_ump(c)                                |
| 949    | 13519      | sink_ump(g)         | sink_ump(g)                                |
| 950    | 12837      | sink_ura(c)         | sink_ura(c)                                |
| 951    | 14085      | sink_urate(x)       | sink_urate(x)                              |
| 952    | 1917       | sink_utp(c)         | sink_utp(c)                                |
| 953    | 13463      | sink_val-L(m)       | sink_val-L(m)                              |
| 954    | 13273      | sink_xoldiolone(r)  | sink_xoldiolone(r)                         |
| 955    | 13275      | sink_xoltriol(c)    | sink_xoltriol(c)                           |
| 956    | 13276      | sink_xoltriol(m)    | sink_xoltriol(m)                           |
| 957    | 1910       | sink_xu5p-D         | sink_xu5p-D                                |
| 958    | 15021      | sink_xyl-D(ly)      | sink_xyl-D(ly)                             |
| 959    | 13643      | sink_xylnt(c)       | sink_xylnt(c)                              |
| 960    | 14025      | sink_xylu-D(c)      | sink_xylu-D(c)                             |
| 961    | 14894      | 10FTHF5GLUtl        | 5-glutamyl-10FTHF transport, lysosomal     |
| 962    | 14901      | 10FTHF5GLUtm        | 5-glutamyl-10FTHF transport, mitochondrial |

| Column | Reaction # | Abbreviation        | Reaction Name                                                                                      |
|--------|------------|---------------------|----------------------------------------------------------------------------------------------------|
| 963    | 14896      | 10FTHF6GLUtl        | 6-glutamyl-10FTHF transport, lysosomal                                                             |
| 964    | 14900      | 10FTHF6GLUtm        | 6-glutamyl-10FTHF transport, mitochondrial                                                         |
| 965    | 14895      | 10FTHF7GLUtl        | 7-glutamyl-10FTHF transport, lysosomal                                                             |
| 966    | 14899      | 10FTHF7GLUtm        | 7-glutamyl-10FTHF transport, mitochondrial                                                         |
| 967    | 14902      | 10FTHFtl            | 10-Formyltetrahydrofolate lysosomal transport via diffusion                                        |
| 968    | 3763       | 10FTHFtm            | 10-Formyltetrahydrofolate mitochondrial transport via diffusion                                    |
| 969    | 19788      | 11DOCRTSLtm         | 11-deoxycortisol intracellular transport                                                           |
| 970    | 19787      | 11DOCRTSLtr         | 11-deoxycortisol intracellular transport                                                           |
| 971    | 19790      | 11DOCRTSTRNtm       | 11-deoxycorticosterone intracellular transport                                                     |
| 972    | 19789      | 11DOCRTSTRNtr       | 11-deoxycorticosterone intracellular transport                                                     |
| 973    | 10534      | 13DAMPPOX           | 1,3-Diaminopropane:oxygen oxidoreductase (deaminating)                                             |
| 974    | 10513      | 1MNCAMti            | N1-Methylnicotinamide transport                                                                    |
| 975    | 12671      | 1PPDCRp             | delta1-piperideine-2-carboxylate reductase, perioxosomal                                           |
| 976    | 11378      | 1a,24,25VITD2Hm     | 1-alpha-Vitamin D-24,25-hydroxylase (D2)                                                           |
| 977    | 11379      | 1a,24,25VITD3Hm     | 1-alpha-Vitamin D-24,25-hydroxylase (D3)                                                           |
| 978    | 11380      | 1a,25VITD2Hm        | 1-alpha,24R,25-Vitamin D-hydroxylase (D2)                                                          |
| 979    | 11381      | 1a,25VITD3Hm        | 1-alpha,24R,25-Vitamin D-hydroxylase (D3)                                                          |
| 980    | 11367      | 24,25DHVITD2t       | 24,25-Dihydroxyvitamin D2 transport from cytoplasm                                                 |
| 981    | 11366      | 24,25DHVITD2tm      | 24,25-Dihydroxyvitamin D2 transport from mitochondria                                              |
| 982    | 11368      | 24,25DHVITD3t       | 24,25-Dihydroxyvitamin D3 transport from cytoplasm                                                 |
| 983    | 11369      | 24,25DHVITD3tm      | 24,25-Dihydroxyvitamin D3 transport from mitochondria                                              |
| 984    | 11329      | 24,25VITD2Hm        | 24R-Vitamin D-25-hydroxylase (D2)                                                                  |
| 985    | 11331      | 24,25VITD3Hm        | 24R-Vitamin D-25-hydroxylase (D3)                                                                  |
| 986    | 19709      | 24NPHte             | xenobiotic transport                                                                               |
| 987    | 11370      | 25HVITD2t           | 25-hydroxyvitamin D2 transport from cytoplasm                                                      |
| 988    | 11371      | 25HVITD2tin         | 25-hydroxyvitamin D2 transport in cytoplasm                                                        |
| 989    | 11373      | 25HVITD2tin-m       | 25-hydroxyvitamin D2 transport in mitochondria                                                     |
| 990    | 11372      | 25HVITD2tm          | 25-hydroxyvitamin D2 transport from mitochondria                                                   |
| 991    | 11374      | 25HVITD3t           | 25-hydroxyvitamin D3 transport from cytoplasm                                                      |
| 992    | 11375      | 25HVITD3tin         | 25-hydroxyvitamin D3 transport in cytoplasm                                                        |
| 993    | 11376      | 25HVITD3tin-m       | 25-hydroxyvitamin D3 transport in mitochondria                                                     |
| 994    | 11377      | 25HVITD3tm          | 25-hydroxyvitamin D3 transport from mitochondria                                                   |
| 995    | 11328      | 25VITD2Hm           | 1-alpha-Vitamin D-25-hydroxylase (D2)                                                              |
| 996    | 11327      | 25VITD3Hm           | 1-alpha-Vitamin D-25-hydroxylase (D3)                                                              |
| 997    | 13555      | 2AMACHYD            | 2-Aminoacrylate hydrolysis                                                                         |
| 998    | 14558      | 2AMACULT            | 2-Aminoacrylate sulfotransferase                                                                   |
| 999    | 11294      | 2AMADPTm            | L-2-aminoadipate shuttle (cytosol/mitochondria)                                                    |
| 1000   | 20139      | 2DR1PP              | 2-deoxy-D-ribose 1-phosphate phosphorylase                                                         |
| 1001   | 10742      | 2HBO                | 2-Hydroxybutyrate:NAD+ oxidoreductase                                                              |
| 1002   | 12476      | 2HBt2               | 2-hydroxybutyrate cotransport with proton                                                          |
| 1003   | 12047      | 2HCO3_NAt           | bicarbonate transport (Na/HCO3 1:2 cotransport)                                                    |
| 1004   | 20838      | 2MCITt              | 2-methylcitrate transport via diffusion                                                            |
| 1005   | 9498       | 2OXOADOXm           | 2-Oxoadipate:lipoamide 2-oxidoreductase(decarboxylating and acceptor-succinylating) (mitochondria) |
| 1006   | 11293      | 2OXOADPTm           | 2-oxoadipate shuttle (cytosol/mitochondria)                                                        |
| 1007   | 9453       | 34DHOXPEGOX         | 3,4-Dihydroxyphenylethyleneglycol:NAD+ oxidoreductase                                              |
| 1008   | 14589      | 34DHOXPEGt          | 3,4-Dihydroxyphenylethyleneglycol transport (diffusion)                                            |
| 1009   | 11389      | 34DHPHMT            | 3,4-Dihydroxyphenylacetate:acet O-methyltransferase                                                |
| 1010   | 12564      | 34DHPHET            | 3,4-Dihydroxy-L-phenylalanine transport                                                            |
| 1011   | 11585      | 34DHPLACOX          | 3,4-Dihydroxyphenylacetaldehyde:NAD+ oxidoreductase                                                |
| 1012   | 9441       | 34DHPLACOX(NADP)    | 3,4-Dihydroxyphenylacetaldehyde:NADP+ oxidoreductase                                               |
| 1013   | 11582      | 34DHXMANDACOX       | 3,4-Dihydroxymandelaldehyde:NAD+ oxidoreductase                                                    |
| 1014   | 9448       | 34DHXMANDACOX(NADP) | 3,4-Dihydroxymandelaldehyde:NADP+ oxidoreductase                                                   |

| Column | Reaction # | Abbreviation          | Reaction Name                                                                                                 |
|--------|------------|-----------------------|---------------------------------------------------------------------------------------------------------------|
| 1015   | 14223      | 34HPLFM               | 3-(4-hydroxyphenyl-)lactate formation                                                                         |
| 1016   | 2388       | 34HPPOR               | 4-Hydroxyphenylpyruvate:oxygen oxidoreductase                                                                 |
| 1017   | 19548      | 35CGMPtn              | 35cGMP nuclear transport                                                                                      |
| 1018   | 14094      | 3AIBTm                | L-3-aminoisobutyrate transaminase, mitochondrial                                                              |
| 1019   | 12083      | 3AIBt                 | 3-amino-isobutyrate transport                                                                                 |
| 1020   | 14971      | 3AIBtm                | 3-amino-isobutyrate transport, mitochondrial                                                                  |
| 1021   | 11091      | 3DPHBH1               | Hydroxylation of 3-Decaprenyl-4-hydroxybenzoate (NADH)                                                        |
| 1022   | 11092      | 3DPHBH2               | Hydroxylation of 3-Decaprenyl-4-hydroxybenzoate (NADPH)                                                       |
| 1023   | 1879       | 3DSPHR                | 3-Dehydrosphinganine reductase                                                                                |
| 1024   | 3260       | 3HAO                  | 3-hydroxyanthranilate 3,4-dioxygenase                                                                         |
| 1025   | 10779      | 3HBCDm                | 3-hydroxybutyryl-CoA dehydratase, mitochondrial                                                               |
| 1026   | 10911      | 3HBCOAHLM             | 3-hydroxyisobutyryl-CoA hydrolase, mitochondrial                                                              |
| 1027   | 12048      | 3HCO3_NAt             | bicarbonate transport (Na/HCO3 1:3 cotransport)                                                               |
| 1028   | 9508       | 3HKYNAKGAT            | 3-Hydroxy-L-kynurenine:2-oxoglutarate aminotransferase                                                        |
| 1029   | 9391       | 3HLYTCL               | 3-Hydroxy-L-tyrosine carboxy-lyase                                                                            |
| 1030   | 9803       | 3HPCOAHYD             | 3-hydroxyisobutyryl-Coenzyme A hydrolase                                                                      |
| 1031   | 10754      | 3HPPD                 | 3-hydroxypropionate dehydrogenase                                                                             |
| 1032   | 9578       | 3HXKYNDCL             | 3-Hydroxykynurenamine decarboxy-lyase                                                                         |
| 1033   | 9582       | 3HXKYNOXDA            | 3-Hydroxykynurenamine:oxygen oxidoreductase(deaminating)(flavin-containing)                                   |
| 1034   | 9434       | 3M4HDXPAC             | 3-Methoxy-4-hydroxyphenylacetaldehyde:NAD+ oxidoreductase                                                     |
| 1035   | 14512      | 3MLDAt                | 3MLDA extracellular transport via diffusion                                                                   |
| 1036   | 13267      | 3MOBt2im              | 3-methyl-2-oxobutanoate mitochondrial transport via proton symport                                            |
| 1037   | 13265      | 3MOPt2im              | 3-Methyl-2-oxopentanoate mitochondrial transport via proton symport                                           |
| 1038   | 11598      | 3MOX4HOXPGALDOX       | 3-Methoxy-4-hydroxyphenylglycolaldehyde:NAD+ oxidoreductase                                                   |
| 1039   | 9450       | 3MOX4HOXPGALDOX(NADP) | 3-Methoxy-4-hydroxyphenylglycolaldehyde:NADP+ oxidoreductase                                                  |
| 1040   | 11387      | 3MOXTYROX             | 3-Methoxytyramine:oxygen oxidoreductase (deaminating)                                                         |
| 1041   | 12645      | 3NTD7I                | 3'-nucleotidase (AMP), lysosome                                                                               |
| 1042   | 14612      | 3SALAASPM             | cysteinesulfinate-aspartate mitochondrial shuttle                                                             |
| 1043   | 9859       | 3SALACBOXL            | 3-Sulfino-L-alanine carboxy-lyase                                                                             |
| 1044   | 14770      | 3SALAOX               | cysteinesulfinic acid oxidase                                                                                 |
| 1045   | 14567      | 3SALATAi              | 3-sulfino-alanine transaminase (irreversible)                                                                 |
| 1046   | 14566      | 3SALATAim             | 3-sulfino-alanine transaminase (irreversible), mitochondrial                                                  |
| 1047   | 11474      | 3SPYRSP               | 3-sulfinopyruvate hydrolase (spontaneous reaction)                                                            |
| 1048   | 14771      | 3SPYRSPm              | 3-sulfinopyruvate hydrolase (spontaneous reaction), mitochondrial                                             |
| 1049   | 9406       | 41R1H2MAE12BOOX       | 4-[(1R)-1-Hydroxy-2-(methylamino)ethyl]-1,2-benzenediol:oxygen oxidoreductase(deaminating)(flavin-containing) |
| 1050   | 12098      | 41R2A1H12BOOX         | 4-[(1R)-2-Amino-1-hydroxyethyl]-1,2-benzenediol:oxygen oxidoreductase(deaminating)(flavin-containing)         |
| 1051   | 9431       | 42A12BOOX             | 4-(2-Aminoethyl)-1,2-benzenediol:oxygen oxidoreductase(deaminating)(flavin-containing)                        |
| 1052   | 1683       | 4ABUTm                | 4-aminobutanoate mitochondrial transport via diffusion                                                        |
| 1053   | 14222      | 4HBZCOAFm             | 4-hydroxybenzoyl-CoA formation                                                                                |
| 1054   | 14227      | 4HBZFm                | 4-hydroxybenzoate formation                                                                                   |
| 1055   | 19710      | 4HDEBRISOQUINEt       | xenobiotic transport                                                                                          |
| 1056   | 1845       | 4HGLSDm               | L-4-hydroxyglutamate semialdehyde dehydrogenase, mitochondrial                                                |

| Column | Reaction # | Abbreviation       | Reaction Name                                                               |
|--------|------------|--------------------|-----------------------------------------------------------------------------|
| 1057   | 9452       | 4HOXPACDOX(NADP)   | 4-Hydroxyphenylacetaldehyde:NADP+ oxidoreductase                            |
| 1058   | 13266      | 4MOPt2im           | 4-methyl-2-oxopentanoate mitochondrial transport via proton symport         |
| 1059   | 19711      | 4MTOLBUTAMIDEte    | xenobiotic transport                                                        |
| 1060   | 19712      | 4NPHSFte           | xenobiotic transport                                                        |
| 1061   | 12105      | 4NPHSULT           | 4-Nitrophenol Sulfotransferase                                              |
| 1062   | 19700      | 4NPHte             | xenobiotic transport                                                        |
| 1063   | 10954      | 4PYRDX             | 4-Pyridoxal secretion                                                       |
| 1064   | 19767      | 5ADTSTSTERONEGLCte | glucuronidated compound transport                                           |
| 1065   | 19744      | 5ADTSTSTERONEGLCtr | glucuronidated compound transport                                           |
| 1066   | 20336      | 5ADTSTSTERONESULT  | 5alpha-Dihydrotestosterone sulfotransferase                                 |
| 1067   | 20338      | 5ADTSTSTERONESte   | sulfonated testosterone transport                                           |
| 1068   | 20021      | 5ADTSTSTERONEte    | 5 alpha dihydrotestosterone transport                                       |
| 1069   | 14985      | 5ADTSTSTERONEtr    | 5 alpha dihydrotestosterone intracellular transport                         |
| 1070   | 1760       | 5AOPtm             | 5-Aminolevulinate mitochondrial transport                                   |
| 1071   | 14888      | 5DHFtl             | 5-glutamyl-DHF transport, lysosomal                                         |
| 1072   | 14839      | 5FTHFt2            | 5-formyltetrahydrofolate transport via anion exchange                       |
| 1073   | 9579       | 5HLTDL             | 5-Hydroxy-L-tryptophan decarboxy-lyase                                      |
| 1074   | 19713      | 5HOMEPRAZOLEte     | xenobiotic transport                                                        |
| 1075   | 9604       | 5HOXINDACTO2OX     | 5-Hydroxyindoleacetaldehyde:oxygen oxidoreductase                           |
| 1076   | 9586       | 5HOXINDACTOX       | 5-Hydroxyindoleacetaldehyde:NAD+ oxidoreductase                             |
| 1077   | 9587       | 5HOXINDACTOXm      | 5-Hydroxyindoleacetaldehyde:NAD+ oxidoreductase (mito)                      |
| 1078   | 9584       | 5HOXINOXDA         | 5-Hydroxytryptamine:oxygen oxidoreductase(deaminating)(flavin-containing)   |
| 1079   | 9610       | 5HTRPDOX           | 5-Hydroxy-L-tryptophan:oxygen 2,3-dioxygenase (indole-decyclizing)          |
| 1080   | 11930      | 5HTRPVESSEC        | 5-hydroxy-L-tryptophan secretion via secretory vesicle (ATP driven)         |
| 1081   | 9577       | 5HXKYNDCL          | 5-Hydroxykynurenamine decarboxy-lyase                                       |
| 1082   | 9581       | 5HXKYNXDA          | 5-Hydroxykynurenamine:oxygen oxidoreductase(deaminating)(flavin-containing) |
| 1083   | 14835      | 5MTHFt             | 5-Methyltetrahydrofolate transport via receptor binding and protolysis      |
| 1084   | 14838      | 5MTHFt2            | 5-methyltetrahydrofolate transport via anion exchange                       |
| 1085   | 14891      | 5THFtl             | 5-glutamyl-THF transport, lysosomal                                         |
| 1086   | 14884      | 5THFtm             | 5-glutamyl-THF transport,m mitochondrial                                    |
| 1087   | 14889      | 6DHFtl             | 6-glutamyl-DHF transport, lysosomal                                         |
| 1088   | 14885      | 6DHFtm             | 6-glutamyl-DHF transport,m mitochondrial                                    |
| 1089   | 19747      | 6HTSTSTERONEte     | hydroxylated testosterone transport                                         |
| 1090   | 19746      | 6HTSTSTERONEtr     | hydroxylated testosterone transport                                         |
| 1091   | 14893      | 6THFtl             | 6-glutamyl-THF transport, lysosomal                                         |
| 1092   | 14883      | 6THFtm             | 6-glutamyl-THF transport,m mitochondrial                                    |
| 1093   | 14707      | 7DHCHSTEROLtr      | cholesterol precursor intracellular transport                               |
| 1094   | 14890      | 7DHFtl             | 7-glutamyl-DHF transport, lysosomal                                         |
| 1095   | 14882      | 7DHFtm             | 7-glutamyl-DHF transport,m mitochondrial                                    |
| 1096   | 14892      | 7THFtl             | 7-glutamyl-THF transport, lysosomal                                         |
| 1097   | 14881      | 7THFtm             | 7-glutamyl-THF transport,m mitochondrial                                    |
| 1098   | 11392      | A4GALTC            | Lactosylceramide 4-alpha-galactosyltransferase                              |
| 1099   | 11071      | A4GALTg            | Lactosylceramide 4-alpha-galactosyltransferase                              |
| 1100   | 8691       | A4GNT1g            | alpha 1,4-N-acetylglucosaminyltransferase, Golgi apparatus                  |
| 1101   | 8689       | A4GNT2g            | alpha 1,4-N-acetylglucosaminyltransferase, Golgi apparatus                  |
| 1102   | 10757      | AACOAT             | Acetoacetyl-CoA:acetate CoA-transferase                                     |

| Column | Reaction # | Abbreviation | Reaction Name                                                                                                                |
|--------|------------|--------------|------------------------------------------------------------------------------------------------------------------------------|
| 1103   | 11706      | AACTOOR      | Aminoacetone:oxygen oxidoreductase(deaminating)(flavin-containing)                                                           |
| 1104   | 14676      | AACTm        | Aminoacetone transport (mitochondrial)                                                                                       |
| 1105   | 10901      | AAPSAS       | AAPSAS                                                                                                                       |
| 1106   | 10886      | AASAD3       | L-aminoadipate-semialdehyde dehydrogenase (NADH)                                                                             |
| 1107   | 11477      | AASAD3m      | L-aminoadipate-semialdehyde dehydrogenase (NADH), mitochondrial                                                              |
| 1108   | 10888      | AATAi        | 2-aminoadipate transaminase, irreversible                                                                                    |
| 1109   | 14603      | ABO1g        | ABO blood group (transferase A, alpha 1-3-N-acetylgalactosaminyltransferase; transferase B, alpha 1-3-galactosyltransferase) |
| 1110   | 14609      | ABO2g        | ABO blood group (transferase A, alpha 1-3-N-acetylgalactosaminyltransferase; transferase B, alpha 1-3-galactosyltransferase) |
| 1111   | 14629      | ABO3g        | ABO blood group (transferase A, alpha 1-3-N-acetylgalactosaminyltransferase; transferase B, alpha 1-3-galactosyltransferase) |
| 1112   | 14630      | ABO4g        | ABO blood group (transferase A, alpha 1-3-N-acetylgalactosaminyltransferase; transferase B, alpha 1-3-galactosyltransferase) |
| 1113   | 14637      | ABO5g        | ABO blood group (transferase A, alpha 1-3-N-acetylgalactosaminyltransferase; transferase B, alpha 1-3-galactosyltransferase) |
| 1114   | 14643      | ABO6g        | ABO blood group (transferase A, alpha 1-3-N-acetylgalactosaminyltransferase; transferase B, alpha 1-3-galactosyltransferase) |
| 1115   | 14647      | ABO7g        | ABO blood group (transferase A, alpha 1-3-N-acetylgalactosaminyltransferase; transferase B, alpha 1-3-galactosyltransferase) |
| 1116   | 14649      | ABO8g        | ABO blood group (transferase A, alpha 1-3-N-acetylgalactosaminyltransferase; transferase B, alpha 1-3-galactosyltransferase) |
| 1117   | 14664      | ABO9g        | ABO blood group (transferase A, alpha 1-3-N-acetylgalactosaminyltransferase; transferase B, alpha 1-3-galactosyltransferase) |
| 1118   | 9373       | ABTArm       | 4-aminobutyrate transaminase, reversible (mitochondrial)                                                                     |
| 1119   | 10157      | ABTD         | L-arabinitol 4-dehydrogenase                                                                                                 |
| 1120   | 19569      | ABTi         | L-arabinitol transport via passive diffusion                                                                                 |
| 1121   | 1267       | ABUTD        | Aminobutyraldehyde dehydrogenase                                                                                             |
| 1122   | 11687      | ABUTt2r      | 4-aminobutyrate reversible transport in via proton symport                                                                   |
| 1123   | 11688      | ABUTt2rL     | 4-aminobutyrate reversible transport in via proton symport (lysosome)                                                        |
| 1124   | 11936      | ABUTt4(2)r   | 4-aminobutyrate reversible transport in via sodium symport (1:2)                                                             |
| 1125   | 2          | ACACT1       | acetyl-CoA C-acetyltransferase                                                                                               |
| 1126   | 10919      | ACACT10m     | acetyl-CoA C-acetyltransferase, mitochondrial                                                                                |
| 1127   | 1498       | ACACT1r      | acetyl-CoA C-acetyltransferase                                                                                               |
| 1128   | 3474       | ACACT1rm     | acetyl-CoA C-acetyltransferase, mitochondrial                                                                                |
| 1129   | 9730       | ACACT1x      | acetyl-CoA C-acetyltransferase, mitochondrial                                                                                |
| 1130   | 3081       | ACACT4p      | acetyl-CoA C-acetyltransferase (octanoyl-CoA), peroxisomal                                                                   |
| 1131   | 2077       | ACACT5p      | acetyl-CoA C-acyltransferase (decanoyl-CoA), peroxisomal                                                                     |
| 1132   | 2076       | ACACT6p      | acetyl-CoA C-acetyltransferase (dodecanoyl), peroxisomal                                                                     |
| 1133   | 3078       | ACACT7p      | acetyl-CoA acyltransferase (tetradecanoyl-CoA), peroxisomal                                                                  |

| Column | Reaction # | Abbreviation                                              | Reaction Name                                               |
|--------|------------|-----------------------------------------------------------|-------------------------------------------------------------|
| 1134   | 2074       | ACACT8p                                                   | acetyl-CoA acyltransferase (hexadecanoyl-CoA), peroxisomal  |
| 1135   | 3077       | ACACT9p                                                   | acetyl-CoA acyltransferase (tetracosanoyl-CoA), peroxisomal |
| 1136   | 2375       | ACACt2                                                    | acetoacetate transport via proton symport                   |
| 1137   | 5495       | ACACt2m                                                   | Acetoacetate mitochondrial transport via H+ symport         |
| 1138   | 20150      | ACACtx                                                    | acetoacetate intracellular transport unknown mechanism      |
| 1139   | 1564       | ACALDt                                                    | acetaldehyde reversible transport                           |
| 1140   | 5533       | ACALDtm                                                   | acetaldehyde mitochondrial diffusion                        |
| 1141   | 19463      | ACALDtx                                                   | acetaldehyde peroxisomal diffusion                          |
| 1142   | 32         | ACCOAC                                                    | acetyl-CoA carboxylase                                      |
| 1143   | 8385       | ACCOACm                                                   | Acetyl-Coa carboxylase, beta isoform                        |
| 1144   | 3258       | ACCOAL                                                    | acetate-CoA ligase (ADP-forming)                            |
| 1145   | 8420       | ACCOALm                                                   | acetate-CoA ligase (AMP-forming)                            |
| 1146   | 12539      | ACCOAgt                                                   | acetyl-coa transport                                        |
| 1147   | 1534       | ACCOAtn                                                   | acetyl-CoA transport, nuclear                               |
| 1148   | 12540      | ACCOAtr                                                   | acetyl-coa transport                                        |
| 1149   | 12480      | ACETONEt2                                                 | acetone transport via proton symport                        |
| 1150   | 14988      | ACETONEt2m                                                | acetone mitochondrial transport via proton symport          |
| 1151   | 20126      | ACGAGBSIDEtg                                              | acgagbside_hs intracellular transport                       |
| 1152   | 20127      | ACGAGBSIDEtl                                              | acgagbside_hs intracellular transport                       |
| 1153   | 19660      | ACGALFUCGALACGALF<br>UC12GAL14ACGLCGALG<br>LUSIDEte       | blood group intracellular transport                         |
| 1154   | 20162      | ACGALFUCGALACGALF<br>UC12GAL14ACGLCGALG<br>LUSIDEtg       | blood group intracellular transport                         |
| 1155   | 19661      | ACGALFUCGALACGALF<br>UCGALACGLCGAL14AC<br>GLCGALGLUSIDEte | blood group intracellular transport                         |
| 1156   | 20163      | ACGALFUCGALACGALF<br>UCGALACGLCGAL14AC<br>GLCGALGLUSIDEtg | blood group intracellular transport                         |
| 1157   | 10648      | ACGALK                                                    | N-acetylgalactosamine kinase                                |
| 1158   | 10649      | ACGALK2                                                   | N-acetylgalactosamine kinase (ITP)                          |
| 1159   | 20149      | ACGALtlg                                                  | N-acetyl-galactosamine intracellular transport              |
| 1160   | 14918      | ACGALtly                                                  | N-acetyl-galactosamine lysosomal efflux                     |
| 1161   | 10642      | ACGAM2E                                                   | N-acetylglucosamine 2-epimerase                             |
| 1162   | 10569      | ACGAM6PSi                                                 | N-acetylglucosamine-6-phosphate synthase                    |
| 1163   | 9377       | ACGAMK                                                    | N-acetylglucosamine kinase                                  |
| 1164   | 1447       | ACGAMPM                                                   | phosphoacetylglucosamine mutase                             |
| 1165   | 14919      | ACGAMtly                                                  | N-acetyl-glucosamine lysosomal efflux                       |
| 1166   | 20128      | ACGBGBSIDEtg                                              | acgbgbside_hs intracellular transport                       |
| 1167   | 20129      | ACGBGBSIDEtl                                              | acgbgbside_hs intracellular transport                       |
| 1168   | 11054      | ACGPID                                                    | N-acetylglucosaminylphosphatidylinositol deacetylase        |
| 1169   | 3464       | ACGSm                                                     | N-acteylglutamate synthase, mitochondrial                   |
| 1170   | 11897      | ACHEe                                                     | Acetylcholinesterase                                        |
| 1171   | 11935      | ACHVESSEC                                                 | Acetylcholine secretion via secretory vesicle (ATP driven)  |
| 1172   | 19523      | ACHtn                                                     | Acetylcholin transport, nuclear through pores               |
| 1173   | 9535       | ACITL                                                     | ATP-Citrate lyase                                           |
| 1174   | 20223      | ACN13ACNGALGBSIDEte                                       | acn13acngalgbside_hs transport                              |
| 1175   | 20207      | ACN13ACNGALGBSIDEtg                                       | acn13acngalgbside_hs intracellular transport                |
| 1176   | 20224      | ACN23ACNGALGBSIDEte                                       | acn23acngalgbside transport                                 |
| 1177   | 20208      | ACN23ACNGALGBSIDEtg                                       | acn23acngalgbside intracellular transport                   |



| Column | Reaction # | Abbreviation                          | Reaction Name                                                             |
|--------|------------|---------------------------------------|---------------------------------------------------------------------------|
| 1178   | 19663      | ACNACNGAL14ACGLCG<br>ALGLUSIDEte      | blood group intracellular transport                                       |
| 1179   | 20164      | ACNACNGAL14ACGLCG<br>ALGLUSIDEtg      | blood group intracellular transport                                       |
| 1180   | 20225      | ACNACNGALGBSIDEte                     | acnacngalgbside_hs transport                                              |
| 1181   | 20209      | ACNACNGALGBSIDEtg                     | acnacngalgbside_hs intracellular transport                                |
| 1182   | 10595      | ACNAM9PL                              | N-Acetylneuraminate 9-phosphate pyruvate-lyase (pyruvate-phosphorylating) |
| 1183   | 10634      | ACNAM9PL2                             | N-Acetylneuraminate 9-phosphate pyruvate-lyase (pyruvate-phosphorylating) |
| 1184   | 10644      | ACNAMPH                               | N-Acetylneuraminate 9-phosphate phosphohydrolase                          |
| 1185   | 13785      | ACNAMlt                               | N-acetylneuraminate transport into lysosome                               |
| 1186   | 15230      | ACNAMtn                               | N-acetylneuraminate nuclear import                                        |
| 1187   | 19665      | ACNGALACGLCGAL14A<br>CGLCGALGLUSIDEte | blood group intracellular transport                                       |
| 1188   | 20165      | ACNGALACGLCGAL14A<br>CGLCGALGLUSIDEtg | blood group intracellular transport                                       |
| 1189   | 10637      | ACNMLr                                | N-Acetylneuraminate lyase (reversible)                                    |
| 1190   | 10914      | ACOAD10m                              | acyl-CoA dehydrogenase (2-methylbutanoyl-CoA), mitochondrial              |
| 1191   | 10437      | ACOAD1fm                              | acyl-CoA dehydrogenase (butanoyl-CoA), mitochondrial                      |
| 1192   | 10333      | ACOAD8m                               | acyl-CoA dehydrogenase (isovaleryl-CoA), mitochondrial                    |
| 1193   | 10916      | ACOAD9m                               | acyl-CoA dehydrogenase (isobutyryl-CoA), mitochondrial                    |
| 1194   | 9596       | ACOAHi                                | acetyl-CoA hydrolase                                                      |
| 1195   | 2063       | ACOA07p                               | acyl-CoA oxidase (hexadecanoyl-CoA), peroxisomal                          |
| 1196   | 3280       | ACOATA                                | Acetyl-CoA ACP transacylase                                               |
| 1197   | 3511       | ACODA                                 | acetylornithine deacetylase                                               |
| 1198   | 285        | ACONT                                 | aconitase                                                                 |
| 1199   | 241        | ACONTm                                | Aconitate hydratase                                                       |
| 1200   | 13931      | ACOX22x                               | acyl-Coenzyme A oxidase 2, branched chain                                 |
| 1201   | 9713       | ACOX2x                                | acyl-Coenzyme A oxidase 2, branched chain                                 |
| 1202   | 120        | ACPI(FMN)                             | acid phosphatase (FMN)                                                    |
| 1203   | 2996       | ACRNtm                                | O-acetylcarnitine transport into mitochondria via diffusion               |
| 1204   | 291        | ACS                                   | acetyl-CoA synthetase                                                     |
| 1205   | 7891       | ACS2                                  | acetyl-CoA synthase (propionate)                                          |
| 1206   | 9605       | ACSOMT                                | S-Adenosyl-L-methionine:N-acetylserotonin O-methyltransferase             |
| 1207   | 9606       | ACSRNMT                               | S-Adenosyl-L-homocysteine:N-acetylserotonin O-methyltransferase           |
| 1208   | 699        | ACSm                                  | acetyl-CoA synthetase                                                     |
| 1209   | 14068      | ACTLMO                                | acetol monooxygenase                                                      |
| 1210   | 14063      | ACTNMO                                | acetone monooxygenase                                                     |
| 1211   | 7129       | ACYP                                  | acylphosphatase                                                           |
| 1212   | 2190       | ACt2m                                 | acetate mitochondrial transport via proton symport                        |
| 1213   | 1557       | ACt2r                                 | acetate reversible transport via proton symport                           |
| 1214   | 20295      | ACtg                                  | acetate transport, Golgi apparatus                                        |
| 1215   | 3513       | ADA                                   | Adenosine deaminase                                                       |
| 1216   | 9856       | ADAe                                  | Adenosine deaminase, extracellular                                        |
| 1217   | 10758      | ADCim                                 | Acetoacetate decarboxylation (irreversible), mitochondrial                |
| 1218   | 12546      | ADEt                                  | adenine reversible transport, cytosol                                     |
| 1219   | 12575      | ADEtl                                 | adenine facilitated transport from lysosome                               |
| 1220   | 19740      | ADHAPtx                               | intracellular transport (peroxisome)                                      |
| 1221   | 181        | ADK1                                  | adenylate kinase                                                          |
| 1222   | 1572       | ADK1m                                 | adenylate kinase, mitochondrial                                           |
| 1223   | 4682       | ADK3                                  | adenylate kinase (GTP)                                                    |

| Column | Reaction # | Abbreviation | Reaction Name                                           |
|--------|------------|--------------|---------------------------------------------------------|
| 1224   | 1573       | ADK3m        | adenylate kinase (GTP)                                  |
| 1225   | 6806       | ADKd         | adenylate kinase (d form)                               |
| 1226   | 303        | ADMDC        | adenosylmethionine decarboxylase                        |
| 1227   | 2539       | ADNCYC       | adenylate cyclase                                       |
| 1228   | 179        | ADNK1        | adenosine kinase                                        |
| 1229   | 20320      | ADNK1m       | adenosine kinase, mitochondrial                         |
| 1230   | 12541      | ADNt         | adenosine facilitated transport in cytosol              |
| 1231   | 12054      | ADNt4        | adenosine transport (Na/Adn cotransport)                |
| 1232   | 12090      | ADNt5        | adenosine transport (1:2 Na/Adn cotransport)            |
| 1233   | 12579      | ADNtl        | adenosine facilitated transport from lysosome           |
| 1234   | 12146      | ADNtm        | adenosine facilitated transport in mitochondria         |
| 1235   | 9700       | ADPGLC       | ADPglucose diphosphatase                                |
| 1236   | 9701       | ADPMAN       | ADPmannose diphosphatase                                |
| 1237   | 2835       | ADPRDP       | ADPribose diphosphatase                                 |
| 1238   | 9699       | ADPRDPm      | ADPribose diphosphatase (mitochondrial)                 |
| 1239   | 15046      | ADPRIBt      | ADPribose transport                                     |
| 1240   | 178        | ADPT         | adenine phosphoribosyltransferase                       |
| 1241   | 13546      | ADPtx        | ADP transporter, peroxisomal                            |
| 1242   | 14279      | ADRNCOAtx    | fatty acid intracellular transport                      |
| 1243   | 19102      | ADRNCPT1     | carnitine O-palmitoyltransferase                        |
| 1244   | 19121      | ADRNCPT2     | carnitine transferase                                   |
| 1245   | 19083      | ADRNCRNt     | transport into the mitochondria (carnitine)             |
| 1246   | 11932      | ADRNLVESSECC | Adrenaline secretion via secretory vesicle (ATP driven) |
| 1247   | 12457      | ADRNt        | fatty acid transport via diffusion                      |
| 1248   | 10024      | ADSELK       | adenylyl-selenate kinase                                |
| 1249   | 2867       | ADSK         | adenylyl-sulfate kinase                                 |
| 1250   | 393        | ADSL1        | adenylosuccinate lyase                                  |
| 1251   | 394        | ADSL2        | adenylosuccinate lyase                                  |
| 1252   | 3516       | ADSS         | adenylosuccinate synthase                               |
| 1253   | 19701      | AFLATOXINte  | xenobiotic transport                                    |
| 1254   | 11444      | AG13T10g     | N-acetylglucosaminyltransferase, Golgi apparatus        |
| 1255   | 11445      | AG13T11g     | N-acetylglucosaminyltransferase, Golgi apparatus        |
| 1256   | 11446      | AG13T12g     | N-acetylglucosaminyltransferase, Golgi apparatus        |
| 1257   | 11447      | AG13T13g     | N-acetylglucosaminyltransferase, Golgi apparatus        |
| 1258   | 11448      | AG13T14g     | N-acetylglucosaminyltransferase, Golgi apparatus        |
| 1259   | 11449      | AG13T15g     | N-acetylglucosaminyltransferase, Golgi apparatus        |
| 1260   | 11521      | AG13T16g     | N-acetylglucosaminyltransferase, Golgi apparatus        |
| 1261   | 11524      | AG13T17g     | N-acetylglucosaminyltransferase, Golgi apparatus        |
| 1262   | 11527      | AG13T18g     | N-acetylglucosaminyltransferase, Golgi apparatus        |
| 1263   | 11424      | AG13T1g      | N-acetylglucosaminyltransferase, Golgi apparatus        |
| 1264   | 11426      | AG13T2g      | N-acetylglucosaminyltransferase, Golgi apparatus        |
| 1265   | 11430      | AG13T3g      | N-acetylglucosaminyltransferase, Golgi apparatus        |
| 1266   | 11408      | AG13T4g      | N-acetylglucosaminyltransferase, Golgi apparatus        |

| Column | Reaction # | Abbreviation     | Reaction Name                                                                                                                              |
|--------|------------|------------------|--------------------------------------------------------------------------------------------------------------------------------------------|
| 1267   | 11437      | AG13T5g          | N-acetyllactosaminide beta-1,3-N-acetylglucosaminyltransferase, Golgi apparatus                                                            |
| 1268   | 11440      | AG13T6g          | N-acetyllactosaminide beta-1,3-N-acetylglucosaminyltransferase, Golgi apparatus                                                            |
| 1269   | 11441      | AG13T7g          | N-acetyllactosaminide beta-1,3-N-acetylglucosaminyltransferase, Golgi apparatus                                                            |
| 1270   | 11442      | AG13T8g          | N-acetyllactosaminide beta-1,3-N-acetylglucosaminyltransferase, Golgi apparatus                                                            |
| 1271   | 11443      | AG13T9g          | N-acetyllactosaminide beta-1,3-N-acetylglucosaminyltransferase, Golgi apparatus                                                            |
| 1272   | 3518       | AGDC             | N-acetylglucosamine-6-phosphate deacetylase                                                                                                |
| 1273   | 10803      | AGLPC            | alkyl acylglycerol phosphocholine transferase                                                                                              |
| 1274   | 10800      | AGLPED           | alkyl acyl glycerophosphoethanolamine desaturase                                                                                           |
| 1275   | 14715      | AGLPET           | alkyl acylglycerol phosphoethanolamine transferase                                                                                         |
| 1276   | 10790      | AGLPH            | alkyl glycerol phosphate hydrolase                                                                                                         |
| 1277   | 10787      | AGLPR            | alkyl glycerol phosphate reductase                                                                                                         |
| 1278   | 10789      | AGLPT            | alkyl glycerol phosphate acyltransferase                                                                                                   |
| 1279   | 20198      | AGMTm            | agmatinase (m)                                                                                                                             |
| 1280   | 14783      | AGPAT1           | 1-acylglycerol-3-phosphate O-acyltransferase 1                                                                                             |
| 1281   | 1338       | AGPRim           | N-acetyl-g-glutamyl-phosphate reductase, irreversible, mitochondrial                                                                       |
| 1282   | 10783      | AGPSx            | alkylglycerone phosphate synthase                                                                                                          |
| 1283   | 10786      | AGPex            | alkyl glycerol phosphate transport                                                                                                         |
| 1284   | 14006      | AGTim            | alanine-glyoxylate transaminase (irreversible), mitochondrial                                                                              |
| 1285   | 14008      | AGTix            | alanine-glyoxylate transaminase (irreversible), (peroxisomal)                                                                              |
| 1286   | 19766      | AHANDROSTANGLCte | glucuronidated compound transport                                                                                                          |
| 1287   | 19748      | AHANDROSTANGLCtr | glucuronidated compound transport                                                                                                          |
| 1288   | 366        | AHC              | adenosylhomocysteinase                                                                                                                     |
| 1289   | 2264       | AHCYStn          | S-adenosyl-L-homocysteine nuclear transport                                                                                                |
| 1290   | 20879      | AHCYStr          | S-Adenosyl-L-homocysteine intracellular diffusion                                                                                          |
| 1291   | 8534       | AHEXASE2ly       | beta-N-acetylhexosaminidase, lysosomal                                                                                                     |
| 1292   | 8535       | AHEXASEly        | beta-N-acetylhexosaminidase, lysosomal                                                                                                     |
| 1293   | 396        | AICART           | phosphoribosylaminoimidazolecarboxamide formyltransferase                                                                                  |
| 1294   | 1429       | AIRCt            | phosphoribosylaminoimidazole carboxylase                                                                                                   |
| 1295   | 4072       | AKGDm            | 2-oxoglutarate dehydrogenase                                                                                                               |
| 1296   | 4314       | AKGMALtm         | alpha-ketoglutarate/malate transporter                                                                                                     |
| 1297   | 12174      | AKGt4_3          | AKG transport via sodium symport                                                                                                           |
| 1298   | 15151      | AKGtp            | AKG transporter, peroxisome                                                                                                                |
| 1299   | 13839      | AKR1C1           | aldo-keto reductase family 1, member C1 (chlordecone reductase; 3-alpha hydroxysteroid dehydrogenase, type I; dihydrodiol dehydrogenase 4) |
| 1300   | 9654       | AKR1C41          | aldo-keto reductase family 1, member C4 (chlordecone reductase; 3-alpha hydroxysteroid dehydrogenase, type I; dihydrodiol dehydrogenase 4) |
| 1301   | 9656       | AKR1C42          | aldo-keto reductase family 1, member C4 (chlordecone reductase; 3-alpha hydroxysteroid dehydrogenase, type I; dihydrodiol dehydrogenase 4) |
| 1302   | 9652       | AKR1D            | aldo-keto reductase family 1, member D1 (delta 4-3-ketosteroid-5-beta-reductase)                                                           |
| 1303   | 9653       | AKR1D2           | aldo-keto reductase family 1, member D1 (delta 4-3-ketosteroid-5-beta-reductase)                                                           |
| 1304   | 11849      | ALAASNNaEx       | L-alanine/L-asparagine Na-dependent exchange (Ala-L in)                                                                                    |
| 1305   | 11836      | ALACYSNaEx       | L-alanine/L-cysteine Na-dependent exchange (Ala-L in)                                                                                      |

| Column | Reaction # | Abbreviation | Reaction Name                                                      |
|--------|------------|--------------|--------------------------------------------------------------------|
| 1306   | 11798      | ALADGLNexR   | L-alanine/glutamine reversible exchange                            |
| 1307   | 11797      | ALADGLYexR   | D-alanine/glycine reversible exchange                              |
| 1308   | 11847      | ALAGLNNaEx   | L-alanine/L-glutamine Na-dependent exchange (Ala-L in)             |
| 1309   | 11796      | ALAGLNexR    | L-alanine/glutamine reversible exchange                            |
| 1310   | 11795      | ALAGLYexR    | L-alanine/glycine reversible exchange                              |
| 1311   | 298        | ALAR         | alanine racemase                                                   |
| 1312   | 11834      | ALASERNaEx   | L-alanine/L-serine Na-dependent exchange (Ala-L in)                |
| 1313   | 1818       | ALASm        | 5-aminolevulinatase synthase                                       |
| 1314   | 299        | ALATA_L      | L-alanine transaminase                                             |
| 1315   | 11838      | ALATHRNaEx   | L-alanine/L-threonine Na-dependent exchange (Ala-L in)             |
| 1316   | 1357       | ALAt2r       | L-alanine reversible transport via proton symport                  |
| 1317   | 11681      | ALAt2rL      | L-alanine reversible transport via proton symport (lysosome)       |
| 1318   | 1422       | ALA4         | Alanine-Sodium symporter                                           |
| 1319   | 11672      | ALAtN1       | Alanine transport (Na, H coupled)                                  |
| 1320   | 220        | ALCD1        | alcohol dehydrogenase (methanol)                                   |
| 1321   | 14167      | ALCD21_D     | alcohol dehydrogenase (D-1,2-propanediol)                          |
| 1322   | 14166      | ALCD21_L     | alcohol dehydrogenase (L-1,2-propanediol)                          |
| 1323   | 14169      | ALCD22_D     | alcohol dehydrogenase (D-lactaldehyde)                             |
| 1324   | 14170      | ALCD22_L     | alcohol dehydrogenase (L-lactaldehyde)                             |
| 1325   | 1211       | ALCD2if      | alcohol dehydrogenase, forward rxn (ethanol -> acetaldehyde)       |
| 1326   | 9528       | ALCD2yf      | alcohol dehydrogenase (ethanol, NADP), forward reaction            |
| 1327   | 2522       | ALDD19x      | aldehyde dehydrogenase (phenylacetaldehyde, NAD)                   |
| 1328   | 9491       | ALDD19x(P)   | aldehyde dehydrogenase (phenylacetaldehyde, NADP)                  |
| 1329   | 2391       | ALDD20x      | aldehyde dehydrogenase (indole-3-acetaldehyde, NAD)                |
| 1330   | 2392       | ALDD20xm     | aldehyde dehydrogenase (indole-3-acetaldehyde, NAD), mitochondrial |
| 1331   | 14870      | ALDD21       | aldehyde dehydrogenase (pristanal, NAD)                            |
| 1332   | 248        | ALDD2x       | aldehyde dehydrogenase (acetaldehyde, NAD)                         |
| 1333   | 1524       | ALDD2xm      | aldehyde dehydrogenase (acetylaldehyde, NAD), mitochondrial        |
| 1334   | 249        | ALDD2y       | aldehyde dehydrogenase (acetaldehyde, NADP)                        |
| 1335   | 19776      | ALDSTRNte    | aldosterone transport                                              |
| 1336   | 19775      | ALDSTRNtm    | aldosterone intracellular transport                                |
| 1337   | 6820       | ALKP         | alkaline phosphatase                                               |
| 1338   | 11422      | ALOX12       | Arachidonate 12-lipoxygenase                                       |
| 1339   | 11423      | ALOX12R      | Arachidonate 12-lipoxygenase R                                     |
| 1340   | 10213      | ALOX15       | Arachidonate 15-lipoxygenase                                       |
| 1341   | 11421      | ALOX5        | Arachidonate 5-lipoxygenase                                        |
| 1342   | 19797      | ALOX52       | Arachidonate 5-lipoxygenase                                        |
| 1343   | 14752      | ALR          | Aldose reductase                                                   |
| 1344   | 14160      | ALR2         | aldose reductase (methylglyoxal)                                   |
| 1345   | 14161      | ALR3         | aldose reductase (acetol)                                          |
| 1346   | 1395       | AM6SAD       | aminomuconate-semialdehyde dehydrogenase                           |
| 1347   | 13927      | AMACR2p      | alpha-methylacyl-CoA racemase (reductase)                          |
| 1348   | 13928      | AMACR2r      | alpha-methylacyl-CoA racemase (reductase)                          |
| 1349   | 9673       | AMACRp       | alpha-methylacyl-CoA racemase                                      |
| 1350   | 9675       | AMACRr       | alpha-methylacyl-CoA racemase                                      |
| 1351   | 2615       | AMANK        | N-acetyl-D-mannosamine kinase                                      |
| 1352   | 2664       | AMCOXO       | 2-aminomuconate reductase                                          |
| 1353   | 20880      | AMETr        | S-Adenosyl-L-methionine intracellular diffusion                    |
| 1354   | 12111      | AMETt2m      | S-Adenosyl-L-methionine reversible transport, mitochondrial        |
| 1355   | 2265       | AMETtn       | S-adenosyl-L-methionine nuclear transport                          |
| 1356   | 3569       | AMPDA        | Adenosine monophosphate deaminase                                  |

| Column | Reaction # | Abbreviation   | Reaction Name                                                 |
|--------|------------|----------------|---------------------------------------------------------------|
| 1357   | 10876      | AMPTASECG      | alanyl aminopeptidase (cys-gly)                               |
| 1358   | 10875      | AMPTASECGe     | alanyl aminopeptidase (cys-gly) (e)                           |
| 1359   | 15149      | AMPtp          | AMP transporter, peroxisome                                   |
| 1360   | 13988      | AMPtr          | AMP transporter, endoplasmic reticulum                        |
| 1361   | 10083      | AMY1e          | alpha-amylase, extracellular (strch1 -> strch2)               |
| 1362   | 10084      | AMY2e          | alpha-amylase, extracellular (glygn2 -> glygn4)               |
| 1363   | 19765      | ANDRSTRNGLCte  | glucuronidated compound transport                             |
| 1364   | 20020      | ANDRSTRNte     | androsterone transport                                        |
| 1365   | 14986      | ANDRSTRNtr     | androsterone intracellular transport                          |
| 1366   | 19702      | ANTIPYRENEte   | xenobiotic transport                                          |
| 1367   | 14657      | AOBUTDsm       | L-2-amino-3-oxobutanoate decarboxylation, mitochondrial       |
| 1368   | 10031      | AP4AH1         | Ap4A hydrolase, asymmetrically                                |
| 1369   | 20181      | APAT2rm        | 3-Aminopropanoate:2-oxoglutarate aminotransferase (m)         |
| 1370   | 20197      | APNNOXte       | xenobiotic transport                                          |
| 1371   | 14765      | APOC-LYS-BTNP  | proteolysis of apoC-Lys-btn                                   |
| 1372   | 14763      | APOC-LYS-BTNPm | proteolysis of apoC-Lys-btn, mitochondrial                    |
| 1373   | 14762      | APOCF          | Apocarboxylase formation                                      |
| 1374   | 14764      | APOCFm         | Apocarboxylase formation, mitochondrial                       |
| 1375   | 20196      | APPNNte        | xenobiotic transport                                          |
| 1376   | 20022      | APRGSTRNte     | hydroxyprogesterone transport                                 |
| 1377   | 2980       | APRTO2         | N-acetylputrescine: oxygen oxidoreductase (deaminating)       |
| 1378   | 14690      | AQCOBALt       | Aquacob(III)alamin uptake                                     |
| 1379   | 2401       | ARAB-Lt        | L-arabinoase extracellular transport                          |
| 1380   | 2051       | ARABR          | arabinose reductase                                           |
| 1381   | 19032      | ARACHCOAtx     | fatty acid intracellular transport                            |
| 1382   | 19070      | ARACHCPT1      | carnitine transferase                                         |
| 1383   | 19071      | ARACHCPT2      | carnitine transferase                                         |
| 1384   | 19069      | ARACHCRNt      | transport into the mitochondria (carnitine)                   |
| 1385   | 19043      | ARACHDCOAtx    | fatty acid intracellular transport                            |
| 1386   | 12455      | ARACHDt2       | fatty acid transport via diffusion                            |
| 1387   | 19800      | ARACHDtr       | intracellular transport                                       |
| 1388   | 12456      | ARACHt         | fatty acid transport via diffusion                            |
| 1389   | 11475      | ARGDCm         | arginine decarboxylase (m)                                    |
| 1390   | 11878      | ARGLYSex       | Arginine/Lysine exchanger (Arg in)                            |
| 1391   | 373        | ARGN           | arginase                                                      |
| 1392   | 9719       | ARGNm          | arginase (m)                                                  |
| 1393   | 2851       | ARGSL          | argininosuccinate lyase                                       |
| 1394   | 306        | ARGSS          | argininosuccinate synthase                                    |
| 1395   | 11703      | ARGt4          | L-arginine transport in via sodium symport                    |
| 1396   | 11695      | ARGtiDF        | L-arginine transport via diffusion (extracellular to cytosol) |
| 1397   | 5289       | ARGtm          | arginine mitochondrial transport via ornithine carrier        |
| 1398   | 11201      | ARSA           | Arylsulfatase A                                               |
| 1399   | 13646      | ARTCOAL1       | R group coenzyme a ligase                                     |
| 1400   | 13647      | ARTCOAL2       | R group coenzyme a ligase                                     |
| 1401   | 13648      | ARTCOAL3       | R group coenzyme a ligase                                     |
| 1402   | 14297      | ARTFR11        | R group artificial flux                                       |
| 1403   | 14298      | ARTFR12        | R group artificial flux (C16:1)                               |
| 1404   | 18759      | ARTFR13        | R group artificial flux                                       |
| 1405   | 14311      | ARTFR202       | R group artificial flux (C18:3, n-3)                          |
| 1406   | 14314      | ARTFR203       | R group artificial flux                                       |
| 1407   | 14313      | ARTFR204       | R group artificial flux                                       |
| 1408   | 14315      | ARTFR205       | R group artificial flux                                       |
| 1409   | 14316      | ARTFR206       | R group artificial flux                                       |
| 1410   | 14317      | ARTFR207       | R group artificial flux                                       |
| 1411   | 14318      | ARTFR208       | R group artificial flux                                       |
| 1412   | 14319      | ARTFR209       | R group artificial flux                                       |

| Column | Reaction # | Abbreviation | Reaction Name                                             |
|--------|------------|--------------|-----------------------------------------------------------|
| 1413   | 14320      | ARTFR210     | R group artificial flux                                   |
| 1414   | 14321      | ARTFR211     | R group artificial flux                                   |
| 1415   | 14323      | ARTFR212     | R group artificial flux                                   |
| 1416   | 14324      | ARTFR213     | R group artificial flux                                   |
| 1417   | 14330      | ARTFR31      | R group artificial flux                                   |
| 1418   | 14331      | ARTFR32      | R group artificial flux                                   |
| 1419   | 14332      | ARTFR33      | R group artificial flux                                   |
| 1420   | 14333      | ARTFR34      | R group artificial flux                                   |
| 1421   | 14335      | ARTFR41      | R group artificial flux                                   |
| 1422   | 14336      | ARTFR42      | R group artificial flux                                   |
| 1423   | 14337      | ARTFR43      | R group artificial flux                                   |
| 1424   | 14338      | ARTFR44      | R group artificial flux                                   |
| 1425   | 14339      | ARTFR45      | R group artificial flux                                   |
| 1426   | 14340      | ARTFR46      | R group artificial flux                                   |
| 1427   | 14342      | ARTFR51      | R group artificial flux                                   |
| 1428   | 14343      | ARTFR52      | R group artificial flux                                   |
| 1429   | 14344      | ARTFR53      | R group artificial flux                                   |
| 1430   | 14345      | ARTFR54      | R group artificial flux                                   |
| 1431   | 14346      | ARTFR55      | R group artificial flux                                   |
| 1432   | 14347      | ARTFR56      | R group artificial flux                                   |
| 1433   | 14348      | ARTFR57      | R group artificial flux                                   |
| 1434   | 14350      | ARTFR61      | R group artificial flux                                   |
| 1435   | 13651      | ARTPLM1      | R group to palmitate conversion                           |
| 1436   | 14736      | ARTPLM1m     | R group to palmitate conversion                           |
| 1437   | 13653      | ARTPLM2      | R group to palmitate conversion                           |
| 1438   | 14737      | ARTPLM2m     | R group to palmitate conversion                           |
| 1439   | 13655      | ARTPLM3      | R group to palmitate conversion                           |
| 1440   | 14738      | ARTPLM3m     | R group to palmitate conversion                           |
| 1441   | 14377      | ASAH1        | N-acylsphingosine amidohydrolase                          |
| 1442   | 10200      | ASCB0X       | ascorbic acid oxidase                                     |
| 1443   | 12131      | ASCBt        | L-ascorbate transport via facilitated diffusion           |
| 1444   | 12130      | ASCBt4       | L-ascorbate transport via proton symport                  |
| 1445   | 11850      | ASNALANaEx   | L-alanine/L-asparagine Na-dependent exchange (Asn-L in)   |
| 1446   | 11858      | ASNCYSNaEx   | L-cysteine/L-asparagine Na-dependent exchange (Asn-L in)  |
| 1447   | 11864      | ASNGLNNaEx   | L-glutamine/L-asparagine Na-dependent exchange (Asn-L in) |
| 1448   | 9381       | ASNNm        | L-asparaginase (mitochondrial)                            |
| 1449   | 259        | ASNS1        | asparagine synthase (glutamine-hydrolysing)               |
| 1450   | 11854      | ASNSERNaEx   | L-serine/L-asparagine Na-dependent exchange (Asn-L in)    |
| 1451   | 11862      | ASNTHRNAEx   | L-threonine/L-asparagine Na-dependent exchange (Asn-L in) |
| 1452   | 11691      | ASNt4        | L-asparagine transport in via sodium symport              |
| 1453   | 11674      | ASNtN1       | Asparagine transport (Na, H coupled)                      |
| 1454   | 11989      | ASNtm        | L-asparagine transport, mitochondrial                     |
| 1455   | 3426       | ASP1DC       | aspartate 1-decarboxylase                                 |
| 1456   | 9421       | ASPCTr       | aspartate carbamoyltransferase (reversible)               |
| 1457   | 11822      | ASPDt6       | D-aspartate transport via Na, H symport and K antiport    |
| 1458   | 11973      | ASPDxt       | D-aspartate transport, peroxisomal                        |
| 1459   | 5291       | ASPGLUm      | aspartate-glutamate mitochondrial shuttle                 |
| 1460   | 14515      | ASPNA1m      | aspartate N-acetyltransferase, mitochondrial              |
| 1461   | 260        | ASPTA        | aspartate transaminase                                    |
| 1462   | 1453       | ASPTAm       | aspartate transaminase                                    |
| 1463   | 11821      | ASPt6        | L-aspartate transport via Na, H symport and K antiport    |
| 1464   | 20199      | ATP1ter      | ADP/ATP transporter, endoplasmic reticulum                |
| 1465   | 15056      | ATP2ter      | AMP/ATP transporter, endoplasmic reticulum                |

| Column | Reaction # | Abbreviation | Reaction Name                                                                  |
|--------|------------|--------------|--------------------------------------------------------------------------------|
| 1466   | 10439      | ATPH1e       | ATP diphosphohydrolase                                                         |
| 1467   | 10441      | ATPH2e       | ATP diphosphohydrolase                                                         |
| 1468   | 4621       | ATPS4m       | ATP synthase (four protons for one ATP)                                        |
| 1469   | 18553      | ATPase1      | V-type ATPase, H <sup>+</sup> transporting, lysosomal                          |
| 1470   | 2423       | ATPtm        | ADP/ATP transporter, mitochondrial                                             |
| 1471   | 14149      | ATPtn        | ATP diffusion in nucleus                                                       |
| 1472   | 13545      | ATPtx        | ATP transporter, peroxisomal                                                   |
| 1473   | 11414      | AVITE1t      | alpha-Tocopherol (Vit. E) transport                                            |
| 1474   | 11413      | AVITE2t      | alpha-tocotrienol (Vit. E) transport                                           |
| 1475   | 8438       | A_MANASE     | alpha-mannosidase                                                              |
| 1476   | 8533       | A_MANASEly   | alpha-mannosidase, lysosomal                                                   |
| 1477   | 11078      | B3GALT3g     | Beta-1,3-galactosyltransferase 3                                               |
| 1478   | 11132      | B3GALT41g    | Beta-1,3-galactosyltransferase 4                                               |
| 1479   | 11133      | B3GALT42g    | Beta-1,3-galactosyltransferase 4                                               |
| 1480   | 11134      | B3GALT43g    | Beta-1,3-galactosyltransferase 4                                               |
| 1481   | 11135      | B3GALT44g    | Beta-1,3-galactosyltransferase 4                                               |
| 1482   | 11081      | B3GALT5g     | Beta-1,3-galactosyltransferase 5                                               |
| 1483   | 14594      | B3GALTg      | Beta galactosyltransferase                                                     |
| 1484   | 14627      | B3GNT11g     | UDP-GlcNAc:betaGal beta-1,3-N-acetylglucosaminyltransferase 1                  |
| 1485   | 14670      | B3GNT12g     | UDP-GlcNAc:betaGal beta-1,3-N-acetylglucosaminyltransferase 1                  |
| 1486   | 14621      | B3GNT310g    | UDP-GlcNAc:betaGal beta-1,3-N-acetylglucosaminyltransferase 3, Golgi apparatus |
| 1487   | 14632      | B3GNT311g    | UDP-GlcNAc:betaGal beta-1,3-N-acetylglucosaminyltransferase 3, Golgi apparatus |
| 1488   | 14639      | B3GNT312g    | UDP-GlcNAc:betaGal beta-1,3-N-acetylglucosaminyltransferase 3, Golgi apparatus |
| 1489   | 14644      | B3GNT313g    | UDP-GlcNAc:betaGal beta-1,3-N-acetylglucosaminyltransferase 3, Golgi apparatus |
| 1490   | 14661      | B3GNT314g    | UDP-GlcNAc:betaGal beta-1,3-N-acetylglucosaminyltransferase 3, Golgi apparatus |
| 1491   | 14672      | B3GNT315g    | UDP-GlcNAc:betaGal beta-1,3-N-acetylglucosaminyltransferase 3, Golgi apparatus |
| 1492   | 11061      | B3GNT31g     | UDP-GlcNAc:betaGal beta-1,3-N-acetylglucosaminyltransferase 3, Golgi apparatus |
| 1493   | 11062      | B3GNT32g     | UDP-GlcNAc:betaGal beta-1,3-N-acetylglucosaminyltransferase 3, Golgi apparatus |
| 1494   | 11063      | B3GNT33g     | UDP-GlcNAc:betaGal beta-1,3-N-acetylglucosaminyltransferase 3, Golgi apparatus |
| 1495   | 11117      | B3GNT34g     | UDP-GlcNAc:betaGal beta-1,3-N-acetylglucosaminyltransferase 3, Golgi apparatus |
| 1496   | 11067      | B3GNT35g     | UDP-GlcNAc:betaGal beta-1,3-N-acetylglucosaminyltransferase 3, Golgi apparatus |
| 1497   | 11068      | B3GNT36g     | UDP-GlcNAc:betaGal beta-1,3-N-acetylglucosaminyltransferase 3, Golgi apparatus |
| 1498   | 11116      | B3GNT37g     | UDP-GlcNAc:betaGal beta-1,3-N-acetylglucosaminyltransferase 3, Golgi apparatus |
| 1499   | 11140      | B3GNT38g     | UDP-GlcNAc:betaGal beta-1,3-N-acetylglucosaminyltransferase 3, Golgi apparatus |
| 1500   | 11263      | B3GNT39g     | UDP-GlcNAc:betaGal beta-1,3-N-acetylglucosaminyltransferase 3, Golgi apparatus |
| 1501   | 14592      | B3GNT51g     | UDP-GlcNAc:betaGal beta-1,3-N-acetylglucosaminyltransferase 5                  |
| 1502   | 13899      | BAAT1x       | bile acid Coenzyme A: amino acid N-acyltransferase                             |
| 1503   | 13900      | BAAT2x       | bile acid Coenzyme A: amino acid N-acyltransferase                             |

| Column | Reaction # | Abbreviation | Reaction Name                                                                      |
|--------|------------|--------------|------------------------------------------------------------------------------------|
| 1504   | 13937      | BAAT3x       | bile acid Coenzyme A: amino acid N-acyltransferase                                 |
| 1505   | 13965      | BAAT4x       | bile acid Coenzyme A: amino acid N-acyltransferase                                 |
| 1506   | 13966      | BAAT5x       | bile acid Coenzyme A: amino acid N-acyltransferase                                 |
| 1507   | 5659       | BACCL        | biotin-[acetyl-CoA-carboxylase] ligase                                             |
| 1508   | 10498      | BACCLm       | biotin-[acetyl-CoA-carboxylase] ligase, mitochondrial                              |
| 1509   | 11921      | BALAVECSEC   | B-alanine secretion via secretory vesicle (ATP driven)                             |
| 1510   | 20188      | BALAtmr      | Beta-alanine reversible mitochondrial transport (diffusion)                        |
| 1511   | 9767       | BAMPPALDOX   | beta-Aminopropion aldehyde:NAD+ oxidoreductase                                     |
| 1512   | 9766       | BAMPPALDOXm  | beta-Aminopropion aldehyde:NAD+ oxidoreductase (m)                                 |
| 1513   | 10956      | BBHOX        | 4-Trimethylammoniobutanoate,2-oxoglutarate:oxygen oxidoreductase (3-hydroxylating) |
| 1514   | 11010      | BCDO         | beta-Carotene dioxygenase                                                          |
| 1515   | 11053      | BDG2HCGHD    | beta-D-Glucosyl-2-coumarinate glucohydrolase                                       |
| 1516   | 5490       | BDHm         | (R)-3-Hydroxybutanoate:NAD+ oxidoreductase                                         |
| 1517   | 7333       | BDMT_L       | GDPmannose:chitobiosyldiphosphodolichol beta-D-mannosyltransferase (liver)         |
| 1518   | 7334       | BDMT_U       | GDPmannose:chitobiosyldiphosphodolichol beta-D-mannosyltransferase (uterus)        |
| 1519   | 2506       | BETALDHx     | betaine-aldehyde dehydrogenase                                                     |
| 1520   | 13252      | BETALDHxm    | betaine-aldehyde dehydrogenase, mitochondrial                                      |
| 1521   | 5493       | BHBt         | (R)-3-Hydroxybutanoate transport via H+ symport                                    |
| 1522   | 5494       | BHBtm        | (R)-3-Hydroxybutanoate mitochondrial transport via H+ symport                      |
| 1523   | 9853       | BHMT         | betaine-homocysteine S-methyltransferase                                           |
| 1524   | 12277      | BILDGLCURt   | bilirubin beta-diglucuronide transport via bicarbonate countertransport            |
| 1525   | 19769      | BILDGLCURte  | bilirubin beta-diglucuronide transport MDR                                         |
| 1526   | 19752      | BILDGLCURtr  | glucuronidated compound transport                                                  |
| 1527   | 12276      | BILGLCURt    | bilirubin monoglucuronide transport via bicarbonate countertransport               |
| 1528   | 19770      | BILGLCURte   | bilirubin monoglucuronide transport MDR                                            |
| 1529   | 19786      | BILGLCURtr   | glucuronidated compound transport                                                  |
| 1530   | 5596       | BILIREd      | Nad(p)h biliverdin reductase                                                       |
| 1531   | 12275      | BILIRUBt2    | bilirubin transport via bicarbonate countertransport                               |
| 1532   | 14198      | BILIRUBtr    | lipid, flip-flop intracellular transport                                           |
| 1533   | 14767      | BIOCYTtn     | biocytin transport, nuclear                                                        |
| 1534   | 11304      | BMTer_L      | B mannosyltransferase, endoplasmic reticulum                                       |
| 1535   | 11349      | BMTer_U      | B mannosyltransferase, endoplasmic reticulum                                       |
| 1536   | 351        | BPNT         | 3',5'-bisphosphate nucleotidase                                                    |
| 1537   | 15235      | BPNT2        | 3',5'-bisphosphate nucleotidase (paps)                                             |
| 1538   | 10494      | BTND1        | biotinidase (biotin)                                                               |
| 1539   | 14766      | BTND1n       | biotinidase (biotin), nuclear                                                      |
| 1540   | 10491      | BTNDe        | biotinidase (biotin), extracellular                                                |
| 1541   | 12132      | BTNDm        | biotinidase (biotin), mitochondrial                                                |
| 1542   | 14755      | BTNPL        | holocarboxylase synthetase (biotin protein ligase)                                 |
| 1543   | 14756      | BTNPLm       | holocarboxylase synthetase (biotin protein ligase), mitochondrial                  |
| 1544   | 1750       | BTNt2        | Biotin reversible transport via proton symport                                     |
| 1545   | 14774      | BTNt2m       | Biotin reversible transport via proton symport, mitochondria                       |
| 1546   | 10480      | BTNt3i       | Biotin transport via sodium symport                                                |
| 1547   | 14017      | BTNt4i       | Biotin uptake (antiport)                                                           |
| 1548   | 14768      | BTNtn        | Biotin transport, nuclear                                                          |
| 1549   | 19604      | BUP2         | beta-ureidopropionase (D-3-amino-isobutanoate forming)                             |
| 1550   | 14990      | BUTt2m       | Butyrate mitochondrial transport via proton symport, reversible                    |



| Column | Reaction # | Abbreviation | Reaction Name                                                 |
|--------|------------|--------------|---------------------------------------------------------------|
| 1551   | 2611       | BUTt2r       | Butyrate transport via proton symport, reversible             |
| 1552   | 11415      | BVITEt       | beta-Tocopherol (Vit. E) transport                            |
| 1553   | 20878      | BZt          | benzoate transport (diffusion)                                |
| 1554   | 13982      | BZtr         | Benzene transporter, endoplasmic reticulum                    |
| 1555   | 8536       | B_MANNASEly  | beta-mannosidase, lysosomal                                   |
| 1556   | 13155      | C110CPT2m    | C110 transport into the mitochondria                          |
| 1557   | 9754       | C14STRr      | C-14 sterol reductase                                         |
| 1558   | 4094       | C160CPT1     | carnitine O-palmitoyltransferase                              |
| 1559   | 4093       | C160CPT2     | C160 transport into the mitochondria                          |
| 1560   | 4104       | C160CRNt     | C160 transport into the mitochondria                          |
| 1561   | 12961      | C161CPT1     | carnitine O-palmitoyltransferase                              |
| 1562   | 20156      | C161CPT12    | carnitine O-palmitoyltransferase                              |
| 1563   | 12962      | C161CPT2     | C161 transport into the mitochondria                          |
| 1564   | 20157      | C161CPT22    | C161 transport into the mitochondria                          |
| 1565   | 20158      | C161CRN2t    | C161 transport into the mitochondria                          |
| 1566   | 12963      | C161CRNt     | C161 transport into the mitochondria                          |
| 1567   | 4095       | C180CPT1     | carnitine O-stearoyl transferase                              |
| 1568   | 4101       | C180CPT2     | carnitine O-stearoyl transferase                              |
| 1569   | 4103       | C180CRNt     | C180 transport into the mitochondria                          |
| 1570   | 4100       | C181CPT1     | carnitine octadecenoyl transferase                            |
| 1571   | 4195       | C181CPT2     | carnitine octadecenoyl transferase                            |
| 1572   | 4102       | C181CRNt     | C181 transport into the mitochondria                          |
| 1573   | 4203       | C204CPT1     | carnitine C20:4 transferase                                   |
| 1574   | 4204       | C204CPT2     | arachidonic acid transport into the mitochondria              |
| 1575   | 4201       | C204CRNt     | arachidonic acid transport into the mitochondria              |
| 1576   | 14282      | C226COAtx    | fatty acid intracellular transport                            |
| 1577   | 4206       | C226CPT1     | carnitine C22:6 transferase                                   |
| 1578   | 4207       | C226CPT2     | C226 transport into the mitochondria                          |
| 1579   | 4205       | C226CRNt     | C226 transport into the mitochondria                          |
| 1580   | 11033      | C2M26DCOAHLM | cis-2-Methyl-5-isopropylhexa-2,5-dienoyl-CoA hydro-lyase (m)  |
| 1581   | 11044      | C2M26DCOAHLX | cis-2-Methyl-5-isopropylhexa-2,5-dienoyl-CoA hydro-lyase (x)  |
| 1582   | 11410      | C3STDH1Pr    | C-3 sterol dehydrogenase (4-methylzymosterol)                 |
| 1583   | 9756       | C3STDH1r     | C-3 sterol dehydrogenase (4-methylzymosterol)                 |
| 1584   | 9762       | C3STKR2r     | C-3 sterol keto reductase (zymosterol)                        |
| 1585   | 9755       | C4STMO1r     | C-4 sterol methyl oxidase (4,4-dimethylzymosterol)            |
| 1586   | 11411      | C4STMO2Pr    | C-4 methyl sterol oxidase                                     |
| 1587   | 9761       | C4STMO2r     | C-4 methyl sterol oxidase                                     |
| 1588   | 15219      | CAATPS       | Ca ATPase                                                     |
| 1589   | 12621      | CAMPt        | cAMP transport (ATP-dependent)                                |
| 1590   | 11002      | CAROTr       | beta-carotene transport via diffusion                         |
| 1591   | 20194      | CARVEOLte    | xenobiotic transport                                          |
| 1592   | 19462      | CAT2p        | catalase A, peroxisomal (ethanol)                             |
| 1593   | 4414       | CATm         | catalase                                                      |
| 1594   | 3223       | CATp         | catalase A, peroxisomal                                       |
| 1595   | 12697      | CAt7r        | calcium / sodium antiporter (1:3), reversible                 |
| 1596   | 14693      | CBL2OR       | NADH:cob(II)alamine oxidoreductase                            |
| 1597   | 14694      | CBL2tm       | Cob(II)alamine transport, mitochondrial                       |
| 1598   | 14689      | CBLATm       | cob(I)alamine adenosyltransferase, mitochondrial              |
| 1599   | 19467      | CBPPer       | Carbamoyl phosphate phosphotransferase, endoplasmic reticulum |
| 1600   | 2852       | CBPS         | carbamoyl-phosphate synthase (glutamine-hydrolysing)          |
| 1601   | 9380       | CBPSam       | carbamoyl-phosphate synthase (ammonia) (mitochondrial)        |
| 1602   | 19464      | CBPter       | carbamoyl phosphate transport, endoplasmic reticulum          |
| 1603   | 11884      | CBR1         | Carbonyl reductase [NADPH] 1                                  |

| Column | Reaction # | Abbreviation | Reaction Name                                             |
|--------|------------|--------------|-----------------------------------------------------------|
| 1604   | 11885      | CBR2         | Carbonyl reductase [NADPH] 1                              |
| 1605   | 11399      | CCA_D3t      | Calcitroic acid transport from cytosol                    |
| 1606   | 11397      | CCA_D3tm     | Calcitroic acid transport from mitochondria               |
| 1607   | 10937      | CDIPTr       | phosphatidylinositol synthase (Homo sapiens)              |
| 1608   | 19810      | CDPDAGtm     | intracellular transport                                   |
| 1609   | 10564      | CDS          | phosphatidate cytidyltransferase                          |
| 1610   | 10565      | CDSm         | phosphatidate cytidyltransferase                          |
| 1611   | 10537      | CEPTC        | choline phosphotransferase                                |
| 1612   | 10538      | CEPTE        | ethanolamine phosphotransferase                           |
| 1613   | 11204      | CERK         | Ceramide kinase                                           |
| 1614   | 13387      | CERT1gt      | ceramide transport protein                                |
| 1615   | 13388      | CERT1rt      | ceramide transport protein                                |
| 1616   | 13389      | CERT2gt      | ceramide transport protein                                |
| 1617   | 13390      | CERT2rt      | ceramide transport protein                                |
| 1618   | 11955      | CGLY3(2)     | Cys-Gly transport in via proton symport                   |
| 1619   | 12622      | CGMPt        | cGMP transport (ATP-dependent)                            |
| 1620   | 9565       | CH25H        | cholesterol 25-hydroxylase                                |
| 1621   | 11892      | CHAT         | Choline O-acetyltransferase                               |
| 1622   | 11893      | CHATn        | Choline O-acetyltransferase                               |
| 1623   | 11899      | CHLP         | choline phosphate phosphatase                             |
| 1624   | 2382       | CHLPCTD      | choline phosphate cytididyltransferase                    |
| 1625   | 13321      | CHLtm        | choline transport via diffusion (cytosol to mitochondria) |
| 1626   | 12266      | CHOLATet     | cholate transport via bicarbonate countertransport        |
| 1627   | 12616      | CHOLATet2    | cholate transport via sodium cotransport                  |
| 1628   | 12667      | CHOLATet3    | ABC bile acid transporter                                 |
| 1629   | 9847       | CHOLD2m      | choline dehydrogenase (FAD acceptor), mitochondrial       |
| 1630   | 2383       | CHOLK        | Choline kinase                                            |
| 1631   | 20346      | CHOLPtg      | choline phosphate intracellular transport                 |
| 1632   | 20345      | CHOLPtI      | choline phosphate intracellular transport                 |
| 1633   | 12129      | CHOLt4       | choline, sodium cotransport                               |
| 1634   | 20154      | CHOLtg       | choline intracellular transport                           |
| 1635   | 19524      | CHOLtn       | Choline transport, nuclear through pores                  |
| 1636   | 20155      | CHOLtr       | choline intracellular transport                           |
| 1637   | 12197      | CHOLtu       | Choline uniport                                           |
| 1638   | 19773      | CHSTEROLSULT | steroid sulfotransferase                                  |
| 1639   | 12591      | CHSTEROLt    | cholesterol efflux (ATP depedent)                         |
| 1640   | 13535      | CHSTEROLt1   | cholesterol intracellular transport                       |
| 1641   | 13536      | CHSTEROLt2   | cholesterol intracellular transport                       |
| 1642   | 13537      | CHSTEROLt3   | cholesterol intracellular transport                       |
| 1643   | 12601      | CHSTEROLtg   | cholesterol efflux (ATP depedent), golgi                  |
| 1644   | 13713      | CHTNASE      | chitinase                                                 |
| 1645   | 13712      | CHTNASEe     | chitinase, extracellular                                  |
| 1646   | 2302       | CITL         | Citrate lyase                                             |
| 1647   | 10811      | CITMCOAHm    | L-Citramalyl-CoA hydro-lyase, mitochondrial               |
| 1648   | 10812      | CITMCOALm    | L-Citramalyl-CoA pyruvate-lyase                           |
| 1649   | 5288       | CITRtm       | citruilline mitochondrial transport via proton antiport   |
| 1650   | 12166      | CITt4_2      | citrate transport via sodium symport                      |
| 1651   | 12171      | CITt4_4      | citrate transport via sodium symport                      |
| 1652   | 763        | CITtam       | citrate transport, mitochondrial                          |
| 1653   | 878        | CITtbm       | citrate transport, mitochondrial                          |
| 1654   | 4525       | CK           | ATP Creatine kinase                                       |
| 1655   | 9725       | CKc          | ATP Creatine kinase (c)                                   |
| 1656   | 12365      | CLFORtex     | chloride transport via formate countertransport           |
| 1657   | 12367      | CLFORtex2    | chloride transport via formate countertransport (2:1)     |
| 1658   | 12368      | CLHCO3tex2   | chloride transport via bicarbonate countertransport (2:1) |
| 1659   | 12363      | CLHCOtex     | chloride transport via bicarbonate countertransport       |

| Column | Reaction # | Abbreviation | Reaction Name                                                        |
|--------|------------|--------------|----------------------------------------------------------------------|
| 1660   | 12364      | CLI2tex      | chloride transport via iodide countertransport                       |
| 1661   | 12369      | CLOHtex2     | chloride transport via hydroxide countertransport (2:1)              |
| 1662   | 12366      | CLOXAtex2    | chloride transport via oxalate countertransport (2:1)                |
| 1663   | 14281      | CLPNDCOAtx   | fatty acid intracellular transport                                   |
| 1664   | 19107      | CLPNDPCPT1   | carnitine O-palmitoyltransferase                                     |
| 1665   | 19126      | CLPNDPCPT2   | carnitine transferase                                                |
| 1666   | 19088      | CLPNDCRNt    | transport into the mitochondria (carnitine)                          |
| 1667   | 12461      | CLPNDt       | fatty acid transport via diffusion                                   |
| 1668   | 10866      | CLS_hs       | cardiolipin synthase (homo sapiens)                                  |
| 1669   | 12141      | CMPACNAtg    | CMP-Sia Golgi transport via CMP antiport                             |
| 1670   | 15228      | CMPACNAtn    | CMP-Sia nuclear export                                               |
| 1671   | 10638      | CMPSAS       | CMP sialic acid synthase                                             |
| 1672   | 10639      | CMPSASn      | CMP sialic acid synthase, nuclear                                    |
| 1673   | 1296       | CO2t         | CO2 transporter via diffusion                                        |
| 1674   | 2244       | CO2ter       | CO2 endoplasmic reticular transport via diffusion                    |
| 1675   | 2157       | CO2tg        | CO2 Golgi transport                                                  |
| 1676   | 2756       | CO2tm        | CO2 transport (diffusion), mitochondrial                             |
| 1677   | 1278       | CO2tn        | CO2 nuclear transport via diffusion                                  |
| 1678   | 2150       | CO2tp        | CO2 peroxisomal transport                                            |
| 1679   | 14655      | COAtl        | CoA transport in lysosome via diffusion                              |
| 1680   | 4074       | COAtm        | CoA transporter                                                      |
| 1681   | 1535       | COAtn        | coenzyme A transport, nuclear                                        |
| 1682   | 1317       | COAtp        | coenzyme A transport, peroxisomal                                    |
| 1683   | 13989      | COAtr        | COA transporter, endoplasmic reticulum                               |
| 1684   | 11139      | COKECBESr    | Carboxylesterase (cocaine) (er)                                      |
| 1685   | 11131      | COQ3m        | methyltransferase COQ3                                               |
| 1686   | 11120      | COQ5m        | Ubiquinone biosynthesis methyltransferase COQ5                       |
| 1687   | 11118      | COQ6m        | Ubiquinone biosynthesis monooxygenase COQ6                           |
| 1688   | 11128      | COQ7m        | Ubiquinone biosynthesis COQ7                                         |
| 1689   | 8571       | CORE2GTg     | Core 2 acetylglucosaminyltransferase, Golgi apparatus                |
| 1690   | 8575       | CORE3GTg     | Core 3 beta-GlcNAc-transferase, Golgi apparatus                      |
| 1691   | 8576       | CORE4GTg     | Core 4 beta6-GalNAc-transferase, Golgi apparatus                     |
| 1692   | 8606       | CORE5GTg     | Core 5 alpha-GalNAc-transferase, Golgi apparatus                     |
| 1693   | 8577       | CORE6GTg     | Core 6 beta-GlcNAc-transferase A, Golgi apparatus                    |
| 1694   | 8607       | CORE7GTg     | Core 7 alpha-GalNAc-transferase, Golgi apparatus                     |
| 1695   | 8608       | CORE8GTg     | N-acetylgalactosamine 3-alpha-galactosyltransferase, Golgi apparatus |
| 1696   | 14225      | COUCOAFm     | p-coumaroyl-CoA formation                                            |
| 1697   | 19703      | COUMARINte   | xenobiotic transport                                                 |
| 1698   | 8578       | COt          | CO transporter via diffusion                                         |
| 1699   | 9960       | CPCTDTX      | choline-phosphate cytidyltransferase                                 |
| 1700   | 1650       | CPPPGO       | coproporphyrinogen oxidase (O2 required)                             |
| 1701   | 11947      | CREATt4(2)r  | Creatine transport (sodium symport) (2:1)                            |
| 1702   | 14382      | CREATmdiffir | Creatine transport to/from mitochondria via diffusion                |
| 1703   | 20203      | CRMPte       | crmp_hs transport                                                    |
| 1704   | 15148      | CRNCAR3tp    | carnitine-propcarnitine carrier, peroxisomal                         |
| 1705   | 3221       | CRNCARtp     | carnitine-acetylcarnitine carrier, peroxisomal                       |
| 1706   | 2971       | CRNt         | L-carnitine reversible transport                                     |
| 1707   | 12201      | CRNtHa       | L-carnitine outward transport (H+ antiport)                          |
| 1708   | 1518       | CRNtim       | L-carnitine transport out of mitochondria via diffusion              |
| 1709   | 12199      | CRNtuIR      | L-carnitine inward uniport                                           |
| 1710   | 12202      | CRNtuNa      | L-carnitine inward transport by Na+ symport                          |
| 1711   | 13158      | CRNtx        | carnitine transport peroxisome to mitochondria                       |
| 1712   | 14453      | CRTNsyn      | Creatinine synthase                                                  |
| 1713   | 19792      | CRTSLtm      | cortisol intracellular transport                                     |
| 1714   | 19791      | CRTSLtr      | cortisol intracellular transport                                     |

| Column | Reaction # | Abbreviation | Reaction Name                                                    |
|--------|------------|--------------|------------------------------------------------------------------|
| 1715   | 19793      | CRTSTRNtm    | corticosterone intracellular transport                           |
| 1716   | 19794      | CRTSTRNtr    | corticosterone intracellular transport                           |
| 1717   | 12462      | CRVNCtr      | fatty acid transport via diffusion                               |
| 1718   | 14403      | CSAPASEly    | chondroitin sulfate A proteoglycan protease, lysosome (endosome) |
| 1719   | 14412      | CSBPASEly    | chondroitin sulfate B proteoglycan protease, lysosome (endosome) |
| 1720   | 14418      | CSCPASEly    | chondroitin sulfate C proteoglycan protease, lysosome (endosome) |
| 1721   | 14428      | CSDPASEly    | chondroitin sulfate D proteoglycan protease, lysosome (endosome) |
| 1722   | 14438      | CSEPASEly    | chondroitin sulfate E proteoglycan protease, lysosome (endosome) |
| 1723   | 8427       | CSNAT2m      | carnitine O-acyltransferase, mitochondrial                       |
| 1724   | 13157      | CSNAT2x      | carnitine dimethyl nonanoyl transferase, reversible, peroxisomal |
| 1725   | 20844      | CSNAT3x      | carnitine O-acyltransferase, peroxisomal                         |
| 1726   | 9423       | CSNATer      | carnitine O-acyltransferase, endoplasmic reticulum               |
| 1727   | 8411       | CSNATm       | carnitine O-acyltransferase, mitochondrial                       |
| 1728   | 4168       | CSNATp       | carnitine O-acyltransferase, reverse direction, peroxisomal      |
| 1729   | 4163       | CSNATr       | carnitine O-acyltransferase                                      |
| 1730   | 3526       | CSND         | Cytosine deaminase                                               |
| 1731   | 12552      | CSNt         | cytosine transport via facilitated diffusion                     |
| 1732   | 14949      | CSPG_At      | chondroitin sulfate A transport, golgi to extracellular          |
| 1733   | 14954      | CSPG_Atly    | chondroitin sulfate A transport, extracellular to lysosome       |
| 1734   | 14950      | CSPG_Bt      | chondroitin sulfate B transport, golgi to extracellular          |
| 1735   | 14955      | CSPG_Btly    | chondroitin sulfate B transport, extracellular to lysosome       |
| 1736   | 14951      | CSPG_Ct      | chondroitin sulfate C transport, golgi to extracellular          |
| 1737   | 14956      | CSPG_Ctly    | chondroitin sulfate C transport, extracellular to lysosome       |
| 1738   | 14952      | CSPG_Dt      | chondroitin sulfate D transport, golgi to extracellular          |
| 1739   | 14957      | CSPG_Dtly    | chondroitin sulfate D transport, extracellular to lysosome       |
| 1740   | 14953      | CSPG_Et      | chondroitin sulfate E transport, golgi to extracellular          |
| 1741   | 14958      | CSPG_Etly    | chondroitin sulfate E transport, extracellular to lysosome       |
| 1742   | 12         | CSm          | citrate synthase                                                 |
| 1743   | 3571       | CTPS1        | CTP synthase (NH <sub>3</sub> )                                  |
| 1744   | 2696       | CTPS2        | CTP synthase (glutamine)                                         |
| 1745   | 14148      | CTPtn        | CTP diffusion in nucleus                                         |
| 1746   | 11817      | CYANSTm      | Cyanide sulfurtransferase, mitochondrial                         |
| 1747   | 20242      | CYANt        | Cyanide transport via diffusion (extracellular to cytosol)       |
| 1748   | 20243      | CYANtm       | Cyanide transport via diffusion (mitochondrial)                  |
| 1749   | 4924       | CYOOm3       | cytochrome c oxidase, mitochondrial Complex IV                   |
| 1750   | 4545       | CYOR-u10m    | ubiquinol-6 cytochrome c reductase, Complex III                  |
| 1751   | 11837      | CYSALANaEx   | L-alanine/L-cysteine Na-dependent exchange (Cys-L in)            |
| 1752   | 14685      | CYSAMO       | Cysteamine oxygenase                                             |
| 1753   | 11857      | CYSASNNaEx   | L-cysteine/L-asparagine Na-dependent exchange (Cys-L in)         |
| 1754   | 11855      | CYSLNNaEx    | L-cysteine/L-glutamine Na-dependent exchange (Cys-L in)          |
| 1755   | 11808      | CYSLTH       | Glutathione:cystine oxidoreductase                               |
| 1756   | 11801      | CYSLUexR     | L-cysteine/L-glutamine reversible exchanger                      |
| 1757   | 11772      | CYSLYex      | L-cysteine/glycine exchanger                                     |
| 1758   | 11802      | CYSLYexR     | L-cysteine/glycine reversible exchanger                          |
| 1759   | 11813      | CYSLYSL      | L-Cystine Lysteine-lyase (deaminating)                           |
| 1760   | 5800       | CYSO         | cysteine oxidase                                                 |
| 1761   | 11841      | CYSSERNaEx   | L-serine/L-cysteine Na-dependent exchange (Cys-L in)             |
| 1762   | 11815      | CYSTA        | cysteine transaminase                                            |

| Column | Reaction # | Abbreviation | Reaction Name                                                   |
|--------|------------|--------------|-----------------------------------------------------------------|
| 1763   | 11816      | CYSTAm       | cysteine transaminase (mitochondrial)                           |
| 1764   | 1592       | CYSTGL       | cystathionine g-lyase                                           |
| 1765   | 11881      | CYSTGLUex    | L-cystine/L- glutamate exchanger                                |
| 1766   | 11846      | CYSTHRNaEx   | L-cysteine/L-threonine Na-dependent exchange (Cys-L in)         |
| 1767   | 1588       | CYSTS        | cystathionine beta-synthase                                     |
| 1768   | 11880      | CYSTSERex    | L-cystine/glycine exchanger (cystine in)                        |
| 1769   | 11952      | CYS4         | L-cysteine reversible transport via sodium symport              |
| 1770   | 11929      | CYStec       | L-cysteine transport via diffusion (extracellular to cytosol)   |
| 1771   | 3527       | CYTD         | cytidine deaminase                                              |
| 1772   | 438        | CYTDK1       | cytidine kinase (ATP)                                           |
| 1773   | 20319      | CYTDK2m      | cytidine kinase (ATP), mitochondrial                            |
| 1774   | 10099      | CYTDn        | cytidine deaminase, nuclear                                     |
| 1775   | 12544      | CYTDt        | cytidine facilitated transport in cytosol                       |
| 1776   | 7882       | CYTDt4       | cytidine transport in via sodium symport                        |
| 1777   | 12144      | CYTDt5       | cytidine transport (1:2 Na/cytd cotransport)                    |
| 1778   | 12574      | CYTDtl       | Cytidine facilitated transport from lysosome                    |
| 1779   | 12150      | CYTDtm       | cytidine facilitated transport in mitochondria                  |
| 1780   | 19530      | CYTDtn       | cytidine transport in nucleus                                   |
| 1781   | 184        | CYTK1        | cytidylate kinase (CMP)                                         |
| 1782   | 10261      | CYTK10       | cytidylate kinase (CMP,dGTP)                                    |
| 1783   | 10262      | CYTK10n      | cytidylate kinase (CMP,dGTP),nuclear                            |
| 1784   | 10265      | CYTK11       | cytidylate kinase (dCMP,dGTP)                                   |
| 1785   | 10266      | CYTK11n      | cytidylate kinase (dCMP,dGTP),nuclear                           |
| 1786   | 10269      | CYTK12       | cytidylate kinase (dCMP,dCTP)                                   |
| 1787   | 10270      | CYTK12n      | cytidylate kinase (dCMP,dCTP),nuclear                           |
| 1788   | 10271      | CYTK13       | cytidylate kinase (dCMP,dATP)                                   |
| 1789   | 10272      | CYTK13n      | cytidylate kinase (dCMP,dATP),nuclear                           |
| 1790   | 10273      | CYTK14       | cytidylate kinase (dCMP,UTP)                                    |
| 1791   | 10274      | CYTK14n      | cytidylate kinase (dCMP,CTP),nuclear                            |
| 1792   | 20318      | CYTK1m       | cytidylate kinase (CMP),mitochondrial                           |
| 1793   | 10230      | CYTK1n       | cytidylate kinase (CMP),nuclear                                 |
| 1794   | 185        | CYTK2        | cytidylate kinase (dCMP)                                        |
| 1795   | 10231      | CYTK2n       | cytidylate kinase (dCMP),nuclear                                |
| 1796   | 10077      | CYTK3        | cytidylate kinase (CMP)(GTP)                                    |
| 1797   | 10236      | CYTK3n       | cytidylate kinase (dCMP,CTP),nuclear                            |
| 1798   | 10078      | CYTK4        | cytidylate kinase (dCMP)(GTP)                                   |
| 1799   | 10248      | CYTK4n       | cytidylate kinase (dCMP,GTP),nuclear                            |
| 1800   | 10249      | CYTK5        | cytidylate kinase (dCMP)                                        |
| 1801   | 10252      | CYTK5n       | cytidylate kinase (CMP),nuclear                                 |
| 1802   | 10254      | CYTK6        | cytidylate kinase (CMP,CTP)                                     |
| 1803   | 10253      | CYTK6n       | cytidylate kinase (CMP,CTP),nuclear                             |
| 1804   | 10255      | CYTK7        | cytidylate kinase (CMP,UTP)                                     |
| 1805   | 10256      | CYTK7n       | cytidylate kinase (CMP,UTP),nuclear                             |
| 1806   | 10257      | CYTK8        | cytidylate kinase (CMP,dATP)                                    |
| 1807   | 10258      | CYTK8n       | cytidylate kinase (CMP,dATP),nuclear                            |
| 1808   | 10259      | CYTK9        | cytidylate kinase (CMP,dCTP)                                    |
| 1809   | 10260      | CYTK9n       | cytidylate kinase (CMP,dCTP),nuclear                            |
| 1810   | 19605      | D-3AIBt      | D-3-amino-isobutyrate transport                                 |
| 1811   | 2056       | D-LACt2      | D-lactate transport via proton symport                          |
| 1812   | 1078       | D-LACtm      | D-lactate transport, mitochondrial                              |
| 1813   | 19601      | D3AIBTm      | D-3-Amino-isobutanoate:pyruvate aminotransferase, mitochondrial |
| 1814   | 3514       | DADA         | Deoxyadenosine deaminase                                        |
| 1815   | 9855       | DADAE        | Deoxyadenosine deaminase, extracellular                         |
| 1816   | 160        | DADNK        | deoxyadenosine kinase                                           |
| 1817   | 10407      | DADNt4       | deoxyadenosine transport via diffusion                          |

| Column | Reaction # | Abbreviation  | Reaction Name                                              |
|--------|------------|---------------|------------------------------------------------------------|
| 1818   | 10902      | DAGK_hs       | Diacylglycerol phosphate kinase (homo sapiens)             |
| 1819   | 10903      | DAGKn_hs      | Diacylglycerol phosphate kinase (homo sapiens)             |
| 1820   | 20130      | DAG_HSter     | diacylglycerol ER export                                   |
| 1821   | 11515      | DALAOXx       | D-Alanine Oxidase (x)                                      |
| 1822   | 1322       | DALAt2r       | D-alanine transport via proton symport                     |
| 1823   | 11684      | DALAt2rL      | D-alanine transport via proton symport (lysosome)          |
| 1824   | 11516      | DALAx         | D-Alanine transport to peroxisome                          |
| 1825   | 10870      | DARGOp        | D-arginine oxidase, perioxosomal                           |
| 1826   | 10205      | DASCBH        | L-Dehydroascorbate lactonohydrolase                        |
| 1827   | 10203      | DASCBR        | dehydroascorbate reductase                                 |
| 1828   | 11972      | DASPO1p       | D-aspartate oxidase, peroxisomal                           |
| 1829   | 14132      | DATPtn        | dATP diffusion in nucleus                                  |
| 1830   | 13239      | DCIm          | dodecenoyl-Coenzyme A delta isomerase                      |
| 1831   | 20249      | DCK1m         | Deoxycytidine kinase, mitochondrial (ATP)                  |
| 1832   | 9845       | DCK1n         | Deoxycytidine kinase, nuclear (ATP)                        |
| 1833   | 9846       | DCK2n         | Deoxycytidine kinase, nuclear (UTP)                        |
| 1834   | 3567       | DCMPDA        | dCMP deaminase                                             |
| 1835   | 14280      | DCSPTNICOAtx  | fatty acid intracellular transport                         |
| 1836   | 19106      | DCSPTN1CPT1   | carnitine O-palmitoyltransferase                           |
| 1837   | 19125      | DCSPTN1CPT2   | carnitine transferase                                      |
| 1838   | 19087      | DCSPTN1CRNt   | transport into the mitochondria (carnitine)                |
| 1839   | 12460      | DCSPTN1t      | fatty acid transport via diffusion                         |
| 1840   | 1483       | DCT           | Dopachrome tautomerase                                     |
| 1841   | 14135      | DCTPtn        | dCTP diffusion in nucleus                                  |
| 1842   | 3528       | DCYTD         | deoxycytidine deaminase                                    |
| 1843   | 10098      | DCYTDn        | deoxycytidine deaminase, nuclear                           |
| 1844   | 10409      | DCYTt         | deoxycytidine transport via diffusion                      |
| 1845   | 13838      | DDPGAm        | 2-dehydro-3-deoxy-phosphogluconate aldolase, mitochondrial |
| 1846   | 12283      | DEBRISOQUINEt | debrisoquine uniport                                       |
| 1847   | 14239      | DECDPtm       | lipid, flip-flop intracellular transport                   |
| 1848   | 7531       | DEDOLP1_L     | dehydrodolichol diphosphate phosphatase (liver)            |
| 1849   | 7548       | DEDOLP1_U     | dehydrodolichol diphosphate phosphatase (uterus)           |
| 1850   | 7540       | DEDOLP2_L     | dehydrodolichol phosphate phosphatase (liver)              |
| 1851   | 7550       | DEDOLP2_U     | dehydrodolichol phosphate phosphatase (uterus)             |
| 1852   | 7544       | DEDOLR_L      | dehydrodolichol reductase (liver)                          |
| 1853   | 7551       | DEDOLR_U      | dehydrodolichol reductase (uterus)                         |
| 1854   | 10335      | DESAT16_2     | palmitoyl-CoA desaturase (n-C16:0CoA -> n-C16:1CoA)        |
| 1855   | 10346      | DESAT18_10    | fatty acyl-CoA desaturase (n-C18:2CoA -> n-C18:3CoA)       |
| 1856   | 10336      | DESAT18_3     | stearoyl-CoA desaturase (n-C18:0CoA -> n-C18:1CoA)         |
| 1857   | 10337      | DESAT18_4     | stearoyl-CoA desaturase (n-C18:0CoA -> n-C18:1CoA)         |
| 1858   | 10338      | DESAT18_5     | stearoyl-CoA desaturase (n-C18:0CoA -> n-C18:1CoA)         |
| 1859   | 10340      | DESAT18_6     | fatty acyl-CoA desaturase (n-C18:1CoA -> n-C18:2CoA)       |
| 1860   | 10341      | DESAT18_7     | fatty acyl-CoA desaturase (n-C18:1CoA -> n-C18:2CoA)       |
| 1861   | 10342      | DESAT18_8     | fatty acyl-CoA desaturase (n-C18:1CoA -> n-C18:2CoA)       |
| 1862   | 10348      | DESAT18_9     | fatty acyl-CoA desaturase (n-C18:2CoA -> n-C18:3CoA)       |
| 1863   | 10354      | DESAT20_1     | fatty acyl-CoA desaturase (n-C20:3CoA -> n-C20:4CoA)       |
| 1864   | 10357      | DESAT20_2     | fatty acyl-CoA desaturase (n-C20:4CoA -> n-C20:5CoA)       |
| 1865   | 10362      | DESAT22_1p    | fatty acyl-CoA desaturase (n-C22:4CoA -> n-C22:5CoA)       |
| 1866   | 14107      | DESAT22_2p    | fatty acyl-CoA desaturase (n-C22:5CoA -> n-C22:6CoA)       |
| 1867   | 14278      | DESAT24_1     | fatty acyl-CoA desaturase (n-C24:5CoA -> n-C24:6CoA)       |
| 1868   | 14782      | DGAT          | diacylglycerol acyltransferase                             |
| 1869   | 19650      | DGCHOLte      | bile acid intracellular transport                          |
| 1870   | 19649      | DGCHOLtx      | bile acid intracellular transport                          |
| 1871   | 2814       | DGK1          | deoxyguanylate kinase (dGMP:ATP)                           |
| 1872   | 20315      | DGK2m         | deoxyguanylate kinase (dGMP:dATP) (mitochondrial)          |

| Column | Reaction # | Abbreviation     | Reaction Name                                                             |
|--------|------------|------------------|---------------------------------------------------------------------------|
| 1873   | 4500       | DGNSKm           | deoxyguanosine kinase                                                     |
| 1874   | 10410      | DGSNt            | deoxyguanosine transport via diffusion                                    |
| 1875   | 20316      | DGSNtm           | deoxyguanosine transport in mitochondria                                  |
| 1876   | 14133      | DGTPtn           | dGTP diffusion in nucleus                                                 |
| 1877   | 10154      | DGULND           | dehydro-L-gulonate decarboxylase                                          |
| 1878   | 11913      | DHAAt1r          | dehydroascorbate transport (uniport)                                      |
| 1879   | 14356      | DHAPA            | dihydroxyacetone phosphate acyltransferase                                |
| 1880   | 14357      | DHAPAx           | dihydroxyacetone phosphate acyltransferase                                |
| 1881   | 14186      | DHCHOLESTANATEtm | lipid, flip-flop intracellular transport                                  |
| 1882   | 9779       | DHCR241r         | 24-dehydrocholesterol reductase [Precursor]                               |
| 1883   | 9780       | DHCR242r         | 24-dehydrocholesterol reductase [Precursor]                               |
| 1884   | 9781       | DHCR243r         | 24-dehydrocholesterol reductase [Precursor]                               |
| 1885   | 9777       | DHCR71r          | 7-dehydrocholesterol reductase                                            |
| 1886   | 9778       | DHCR72r          | 7-dehydrocholesterol reductase                                            |
| 1887   | 10891      | DHCRD1           | dihydroceramide desaturase                                                |
| 1888   | 10892      | DHCRD2           | dihydroceramide desaturase                                                |
| 1889   | 11094      | DHDPBMTm         | dihydroxydecaprenylbenzoate methyltransferase                             |
| 1890   | 12069      | DHEASULT         | Dehydroepiandrosterone sulfotransferase                                   |
| 1891   | 12269      | DHEASt           | dehydroepiandrosterone sulfate transport via bicarbonate countertransport |
| 1892   | 19777      | DHEAStr          | dheas intracellular transport                                             |
| 1893   | 77         | DHFR             | dihydrofolate reductase                                                   |
| 1894   | 14904      | DHFtl            | dihydrofolate reversible lysosomal transport                              |
| 1895   | 1758       | DHFtm            | dihydrofolate reversible mitochondrial transport                          |
| 1896   | 12084      | DHORD9           | dihydroorotic acid dehydrogenase (quinone10)                              |
| 1897   | 444        | DHORTS           | dihydroorotase                                                            |
| 1898   | 92         | DHPM1            | dihydropyrimidinase (5,6-dihydrouracil)                                   |
| 1899   | 61         | DHPM2            | dihydropyrimidinase (dihydrothymine)                                      |
| 1900   | 14579      | DHPR             | 6,7-dihydropteridine reductase                                            |
| 1901   | 14582      | DHPR2            | 6,7-dihydropteridine reduction                                            |
| 1902   | 19533      | DIDPtn           | dIDP nuclear transport                                                    |
| 1903   | 20226      | DIGALSGALSIDEte  | digalsgalside_hs transport                                                |
| 1904   | 20210      | DIGALSGALSIDEtg  | digalsgalside_hs intracellular transport                                  |
| 1905   | 20137      | DIGALSIDEtg      | digalside_hs intracellular transport                                      |
| 1906   | 20136      | DIGALSIDEtl      | digalside_hs intracellular transport                                      |
| 1907   | 10412      | DINt             | deoxyinosine transport via diffusion                                      |
| 1908   | 19534      | DITPtn           | dITP nuclear transport                                                    |
| 1909   | 1631       | DKMPPD           | 2,3-diketo-5-methylthio-1-phosphopentane degradation reaction             |
| 1910   | 19100      | DLNLGCPT1        | carnitine O-palmitoyltransferase                                          |
| 1911   | 19119      | DLNLGCPT2        | carnitine transferase                                                     |
| 1912   | 19081      | DLNLGCRNt        | transport into the mitochondria (carnitine)                               |
| 1913   | 12464      | DLNLGt           | fatty acid transport via diffusion                                        |
| 1914   | 19714      | DMANTIPYRINete   | xenobiotic transport                                                      |
| 1915   | 108        | DMATT            | dimethylallyltranstransferase                                             |
| 1916   | 9743       | DMATTx           | dimethylallyltranstransferase                                             |
| 1917   | 11701      | DMGDHm           | dimethylglycine dehydrogenase, mitochondrial                              |
| 1918   | 13323      | DMGtm            | dimethylglycine transport via diffusion (cytosol to mitochondria)         |
| 1919   | 20832      | DMHPTCRNCPT1     | carnitine fatty-acyl transferase                                          |
| 1920   | 20339      | DMHPTCRNCPT2     | 2,6 dimethylheptanoly CoA carnitine transferase                           |
| 1921   | 20340      | DMHPTCRNt        | 2,6 dimethylheptanoyl crn transport                                       |
| 1922   | 20341      | DMHPTCRNte       | 2,6 dimethylheptanoyl carnitine transport                                 |
| 1923   | 760        | DM_nadh          | demand NADH                                                               |
| 1924   | 13541      | DM_nadh(m)       | demand NADH(m)                                                            |
| 1925   | 761        | DM_nadph         | NADPH demand                                                              |

| Column | Reaction # | Abbreviation | Reaction Name                                |
|--------|------------|--------------|----------------------------------------------|
| 1926   | 2796       | DNADDP       | Deamido NAD diphosphatase                    |
| 1927   | 19528      | DNADtn       | dNAD transport, nuclear through pore         |
| 1928   | 11357      | DNAMTSEn     | DNA (cytosine-5-)-methyltransferase, nucleus |
| 1929   | 10183      | DNAMTn       | DNA (cytosine-5-)-methyltransferase, nucleus |
| 1930   | 11183      | DNDPt10m     | dADP transport via dCDP antiport             |
| 1931   | 11184      | DNDPt11m     | dADP transport via dGDP antiport             |
| 1932   | 11185      | DNDPt12m     | dADP transport via ADP antiport              |
| 1933   | 11186      | DNDPt13m     | dADP transport via ATP antiport              |
| 1934   | 11187      | DNDPt14m     | dUDP transport via dTDP antiport             |
| 1935   | 11188      | DNDPt15m     | dUDP transport via dGDP antiport             |
| 1936   | 11189      | DNDPt16m     | dUDP transport via dADP antiport             |
| 1937   | 11190      | DNDPt17m     | dUDP transport via dCDP antiport             |
| 1938   | 11191      | DNDPt18m     | dUDP transport via ADP antiport              |
| 1939   | 11193      | DNDPt19m     | dUDP transport via ATP antiport              |
| 1940   | 11165      | DNDPt1m      | dATP transport via ADP antiport              |
| 1941   | 11209      | DNDPt20m     | dTDP transport via ATP antiport              |
| 1942   | 11210      | DNDPt21m     | dTDP transport via ADP antiport              |
| 1943   | 11211      | DNDPt22m     | dTDP transport via dUDP antiport             |
| 1944   | 11212      | DNDPt23m     | dTDP transport via dGTP antiport             |
| 1945   | 11214      | DNDPt24m     | dTDP transport via dADP antiport             |
| 1946   | 11215      | DNDPt25m     | dTDP transport via dCDP antiport             |
| 1947   | 11216      | DNDPt26m     | dCDP transport via dUDP antiport             |
| 1948   | 11217      | DNDPt27m     | dCDP transport via dTDP antiport             |
| 1949   | 11218      | DNDPt28m     | dCDP transport via dGDP antiport             |
| 1950   | 11219      | DNDPt29m     | dCDP transport via dADP antiport             |
| 1951   | 11166      | DNDPt2m      | dATP transport via ATP antiport              |
| 1952   | 11220      | DNDPt30m     | dCDP transport via ADP antiport              |
| 1953   | 11221      | DNDPt31m     | dCDP transport via ATP antiport              |
| 1954   | 11222      | DNDPt32m     | dGDP transport via ATP antiport              |
| 1955   | 11223      | DNDPt33m     | dGDP transport via dUDP antiport             |
| 1956   | 11224      | DNDPt34m     | dGDP transport via dTDP antiport             |
| 1957   | 11225      | DNDPt35m     | dGDP transport via dADP antiport             |
| 1958   | 11226      | DNDPt36m     | dGDP transport via dCDP antiport             |
| 1959   | 11227      | DNDPt37m     | dUTP transport via dTDP antiport             |
| 1960   | 11229      | DNDPt38m     | dUTP transport via dUDP antiport             |
| 1961   | 11230      | DNDPt39m     | dUTP transport via dGDP antiport             |
| 1962   | 11176      | DNDPt3m      | dATP transport via dCDP antiport             |
| 1963   | 11231      | DNDPt40m     | dUTP transport via dADP antiport             |
| 1964   | 11232      | DNDPt41m     | dUTP transport via dCDP antiport             |
| 1965   | 11233      | DNDPt42m     | dUTP transport via ADP antiport              |
| 1966   | 11234      | DNDPt43m     | dUTP transport via ATP antiport              |
| 1967   | 11235      | DNDPt44m     | dTTP transport via ATP antiport              |
| 1968   | 11236      | DNDPt45m     | dTTP transport via ADP antiport              |
| 1969   | 11237      | DNDPt46m     | dTTP transport via dUDP antiport             |
| 1970   | 11238      | DNDPt47m     | dTTP transport via dTDP antiport             |
| 1971   | 11239      | DNDPt48m     | dTTP transport via dGDP antiport             |
| 1972   | 11240      | DNDPt49m     | dTTP transport via dADP antiport             |
| 1973   | 11175      | DNDPt4m      | dATP transport via dUDP antiport             |
| 1974   | 11241      | DNDPt50m     | dTTP transport via dCDP antiport             |
| 1975   | 11242      | DNDPt51m     | dCTP transport via dCDP antiport             |
| 1976   | 11243      | DNDPt52m     | dCTP transport via dUDP antiport             |
| 1977   | 11244      | DNDPt53m     | dCTP transport via dGDP antiport             |
| 1978   | 11245      | DNDPt54m     | dCTP transport via dADP antiport             |
| 1979   | 11246      | DNDPt55m     | dCTP transport via ADP antiport              |
| 1980   | 11247      | DNDPt56m     | dCTP transport via ATP antiport              |
| 1981   | 11248      | DNDPt57m     | dGTP transport via ATP antiport              |



| Column | Reaction # | Abbreviation  | Reaction Name                                                                                  |
|--------|------------|---------------|------------------------------------------------------------------------------------------------|
| 1982   | 11249      | DNDPt58m      | dGTP transport via ADP antiport                                                                |
| 1983   | 11250      | DNDPt59m      | dGTP transport via dADP antiport                                                               |
| 1984   | 11174      | DNDPt5m       | dATP transport via dTDP antiport                                                               |
| 1985   | 11251      | DNDPt60m      | dGTP transport via dUDP antiport                                                               |
| 1986   | 11252      | DNDPt61m      | dGTP transport via dTDP antiport                                                               |
| 1987   | 11253      | DNDPt62m      | dGTP transport via dGDP antiport                                                               |
| 1988   | 11254      | DNDPt63m      | dGTP transport via dCDP antiport                                                               |
| 1989   | 11173      | DNDPt6m       | dATP transport via dGDP antiport                                                               |
| 1990   | 11177      | DNDPt7m       | dATP transport via dADP antiport                                                               |
| 1991   | 11181      | DNDPt8m       | dADP transport via dUDP antiport                                                               |
| 1992   | 11182      | DNDPt9m       | dADP transport via dTDP antiport                                                               |
| 1993   | 10207      | DOGULND1      | 2,3-dioxo-L-gulonate decarboxylase (L-lyxonate-forming)                                        |
| 1994   | 10208      | DOGULND2      | 2,3-dioxo-L-gulonate decarboxylase (L-xylonate-forming)                                        |
| 1995   | 10224      | DOGULNO1      | 2,3-dioxo-L-gulonate:hydrogen peroxide oxidoreductase                                          |
| 1996   | 10227      | DOGULNO2      | 2,3-dioxo-L-gulonate:hydrogen peroxide oxidoreductase                                          |
| 1997   | 7593       | DOLASNT_Ler   | Dolichyl-diphosphooligosaccharide:protein-L-asparagine oligopolysaccharidotransferase (liver)  |
| 1998   | 7594       | DOLASNT_Uer   | Dolichyl-diphosphooligosaccharide:protein-L-asparagine oligopolysaccharidotransferase (uterus) |
| 1999   | 7304       | DOLDPP_Ler    | Dolichyl-diphosphate phosphohydrolase, human (liver)                                           |
| 2000   | 7305       | DOLDPP_Uer    | Dolichyl-diphosphate phosphohydrolase, human (uterus)                                          |
| 2001   | 7346       | DOLGLCP_Lter  | Dolichyl beta-D-glucosyl phosphate flippase (liver)                                            |
| 2002   | 7347       | DOLGLCP_Uter  | Dolichyl beta-D-glucosyl phosphate flippase (uterus)                                           |
| 2003   | 7307       | DOLGPP_Ler    | Dolichyl-beta-D-glucosyl-phosphate dolichylphosphohydrolase (liver)                            |
| 2004   | 7308       | DOLGPP_Uer    | Dolichyl-beta-D-glucosyl-phosphate dolichylphosphohydrolase (uterus)                           |
| 2005   | 7297       | DOLICHOL_Lter | dolichol diffusion, human (liver)                                                              |
| 2006   | 7298       | DOLICHOL_Uter | dolichol diffusion, human (uterus)                                                             |
| 2007   | 7296       | DOLK_L        | Dolichol kinase, human (liver)                                                                 |
| 2008   | 7299       | DOLK_U        | Dolichol kinase, human (uterus)                                                                |
| 2009   | 7344       | DOLMANP_Lter  | dolichol-phosphate mannose flippase (liver)                                                    |
| 2010   | 7345       | DOLMANP_Uter  | dolichol-phosphate mannose flippase (uterus)                                                   |
| 2011   | 7662       | DOLPGT1_Ler   | dolichyl-phosphate-glucose-glycolipid alpha-glucosyltransferase (liver)                        |
| 2012   | 7660       | DOLPGT1_Uer   | dolichyl-phosphate-glucose-glycolipid alpha-glucosyltransferase (uterus)                       |
| 2013   | 7658       | DOLPGT2_Ler   | dolichyl-phosphate-glucose-glycolipid alpha-glucosyltransferase (liver)                        |
| 2014   | 7655       | DOLPGT2_Uer   | dolichyl-phosphate-glucose-glycolipid alpha-glucosyltransferase (uterus)                       |
| 2015   | 7651       | DOLPGT3_Ler   | dolichyl-phosphate-glucose-glycolipid alpha-glucosyltransferase (liver)                        |
| 2016   | 7650       | DOLPGT3_Uer   | dolichyl-phosphate-glucose-glycolipid alpha-glucosyltransferase (uterus)                       |
| 2017   | 7301       | DOLPH_Ler     | Dolichol-phosphate phosphohydrolase, human (liver)                                             |
| 2018   | 7303       | DOLPH_Uer     | Dolichol-phosphate phosphohydrolase, human (uterus)                                            |
| 2019   | 7649       | DOLPMT1_Ler   | dolichyl-phosphate-mannose-glycolipid alpha-mannosyltransferase (liver)                        |
| 2020   | 7648       | DOLPMT1_Uer   | dolichyl-phosphate-mannose-glycolipid alpha-mannosyltransferase (uterus)                       |
| 2021   | 7647       | DOLPMT2_Ler   | dolichyl-phosphate-mannose-glycolipid alpha-mannosyltransferase (liver)                        |
| 2022   | 7646       | DOLPMT2_Uer   | dolichyl-phosphate-mannose-glycolipid alpha-mannosyltransferase (uterus)                       |

| Column | Reaction # | Abbreviation | Reaction Name                                                            |
|--------|------------|--------------|--------------------------------------------------------------------------|
| 2023   | 7645       | DOLPMT3_Ler  | dolichyl-phosphate-mannose-glycolipid alpha-mannosyltransferase (liver)  |
| 2024   | 7644       | DOLPMT3_Uer  | dolichyl-phosphate-mannose-glycolipid alpha-mannosyltransferase (uterus) |
| 2025   | 7643       | DOLPMT4_Ler  | dolichyl-phosphate-mannose-glycolipid alpha-mannosyltransferase (liver)  |
| 2026   | 7642       | DOLPMT4_Uer  | dolichyl-phosphate-mannose-glycolipid alpha-mannosyltransferase (uterus) |
| 2027   | 7313       | DOLPMT_L     | Dolichyl-phosphate D-mannosyltransferase (liver)                         |
| 2028   | 7314       | DOLPMT_U     | Dolichyl-phosphate D-mannosyltransferase (uterus)                        |
| 2029   | 7311       | DOLP_Lter    | dolichol phosphate flippase (liver)                                      |
| 2030   | 7312       | DOLP_Uter    | dolichol phosphate flippase (uterus)                                     |
| 2031   | 12099      | DOPABMO      | dopamine beta-monoxygenase                                               |
| 2032   | 10562      | DOPACHRMISO  | L-dopachrome isomerase 1                                                 |
| 2033   | 11384      | DOPAMT       | Dopamine:amet O-methyltransferase                                        |
| 2034   | 10561      | DOPAQNISO1   | Dopaquinone isomerase 1                                                  |
| 2035   | 19420      | DOPASFt      | Dopamine 3-O-sulfate transport (diffusion)                               |
| 2036   | 12103      | DOPASULT     | Dopamine Sulfotransferase                                                |
| 2037   | 11931      | DOPAVESSEC   | Dopamine secretion via secretory vesicle (ATP driven)                    |
| 2038   | 11938      | DOPA4(2)r    | Dopamine reversible transport in via sodium symport (1:2)                |
| 2039   | 12192      | DOPA4tu      | Dopamine uniport                                                         |
| 2040   | 10871      | DORNOp       | D-ornithine oxidase, perioxosomal                                        |
| 2041   | 2790       | DPCOAK       | dephospho-CoA kinase                                                     |
| 2042   | 14679      | DPCOAPP      | pyrophosphatase (dephospho-CoA)                                          |
| 2043   | 14686      | DPCOAtl      | dephospho-CoA transport from lysosome via diffusion                      |
| 2044   | 3110       | DPGM         | Diphosphoglyceromutase                                                   |
| 2045   | 755        | DPGase       | Diphosphoglycerate phosphatase                                           |
| 2046   | 11095      | DPHMBDCm     | 3-Decaprenyl-4-hydroxy-5-methoxybenzoate decarboxylation                 |
| 2047   | 9736       | DPMVDx       | diphosphomevalonate decarboxylase                                        |
| 2048   | 14238      | DPSS         | decaprenyl synthase                                                      |
| 2049   | 10268      | DPROOp       | D-proline oxidase, perioxosomal                                          |
| 2050   | 2023       | DRBK         | Deoxyribokinase                                                          |
| 2051   | 20140      | DRIBt        | deoxyribose transport via diffusion                                      |
| 2052   | 4640       | DRPA         | deoxyribose-phosphate aldolase                                           |
| 2053   | 14373      | DSAT         | dihydrosphingosine N-acyltransferase                                     |
| 2054   | 19535      | DTDPTn       | dTDP nuclear transport                                                   |
| 2055   | 2815       | DTMPK        | dTMP kinase                                                              |
| 2056   | 14134      | DTTPtn       | dTTP diffusion in nucleus                                                |
| 2057   | 19545      | DUDPTn       | dUDP nuclear transport                                                   |
| 2058   | 2271       | DUMPtn       | dUMP nuclear transport                                                   |
| 2059   | 9523       | DURAD        | dihydrouracil dehydrogenase (NADP)                                       |
| 2060   | 9524       | DURAD2       | dihydrothymine dehydrogenase (NADP)                                      |
| 2061   | 2691       | DURIK1       | deoxyuridine kinase (ATP:Deoxyuridine)                                   |
| 2062   | 10100      | DURIK1m      | deoxyuridine kinase (ATP:Deoxyuridine), mitochondrial                    |
| 2063   | 1084       | DURIPP       | deoxyuridine phosphorylase                                               |
| 2064   | 10413      | DURIt        | deoxyuridine transport via diffusion                                     |
| 2065   | 19532      | DURItm       | deoxyuridine transport in nucleus                                        |
| 2066   | 4502       | DUTPDPm      | dUTP diphosphatase                                                       |
| 2067   | 10101      | DUTPDPn      | dUTP diphosphatase, nuclear                                              |
| 2068   | 19715      | EAFLATOXINte | xenobiotic transport                                                     |
| 2069   | 19724      | EBASTINEOHte | xenobiotic transport                                                     |
| 2070   | 19726      | EBASTINEOHtr | xenobiotic transport                                                     |
| 2071   | 19723      | EBASTINEte   | xenobiotic transport                                                     |
| 2072   | 19725      | EBASTINEtr   | xenobiotic transport                                                     |
| 2073   | 9768       | EBP1r        | 3-beta-hydroxysteroid-delta(8),delta(7)-isomerase                        |

| Column | Reaction # | Abbreviation   | Reaction Name                                                                 |
|--------|------------|----------------|-------------------------------------------------------------------------------|
| 2074   | 9769       | EBP2r          | 3-beta-hydroxysteroid-delta(8),delta(7)-isomerase                             |
| 2075   | 11284      | ECGISO         | Ecgonine isomerase (ER)                                                       |
| 2076   | 10910      | ECOAH12m       | 3-hydroxyacyl-CoA dehydratase (3-hydroxyisobutyryl-CoA) (mitochondria)        |
| 2077   | 9503       | ECOAH1m        | 3-hydroxyacyl-CoA dehydratase (3-hydroxybutanoyl-CoA) (mitochondria)          |
| 2078   | 9504       | ECOAH1x        | 3-hydroxyacyl-CoA dehydratase (3-hydroxybutanoyl-CoA) (perioxisome)           |
| 2079   | 10917      | ECOAH9m        | 2-Methylprop-2-enoyl-CoA (2-Methylbut-2-enoyl-CoA), mitochondrial             |
| 2080   | 11281      | EGMESTr        | ecgonine methyl esterase (ER)                                                 |
| 2081   | 1844       | EHGLAT         | L-erythro-4-Hydroxyglutamate:2-oxoglutarate aminotransferase                  |
| 2082   | 13890      | EHGLAT2m       | L-erythro-4-Hydroxyglutamate:2-oxoglutarate aminotransferase 2, mitochondrial |
| 2083   | 1842       | EHGLATm        | L-erythro-4-Hydroxyglutamate:2-oxoglutarate aminotransferase, mitochondrial   |
| 2084   | 19101      | EICOSTETCPT1   | carnitine O-palmitoyltransferase                                              |
| 2085   | 19120      | EICOSTETCPT2   | carnitine transferase                                                         |
| 2086   | 19082      | EICOSTETCRNt   | transport into the mitochondria (carnitine)                                   |
| 2087   | 12467      | EICOSTETt      | fatty acid transport via diffusion                                            |
| 2088   | 19093      | ELAIDCPT1      | carnitine O-palmitoyltransferase                                              |
| 2089   | 19112      | ELAIDCPT2      | carnitine transferase                                                         |
| 2090   | 19074      | ELAIDCRNt      | transport into the mitochondria (carnitine)                                   |
| 2091   | 12450      | ELAIDt         | fatty acid transport via diffusion                                            |
| 2092   | 8433       | ENGASE         | endo-beta-N-acetylglucosaminidase                                             |
| 2093   | 8450       | ENGASE2        | endo-beta-N-acetylglucosaminidase                                             |
| 2094   | 8537       | ENGASE2ly      | endo-beta-N-acetylglucosaminidase, lysosomal                                  |
| 2095   | 14457      | ENGASE3ly      | endo-beta-N-acetylglucosaminidase, lysosomal                                  |
| 2096   | 8538       | ENGASEly       | endo-beta-N-acetylglucosaminidase, lysosomal                                  |
| 2097   | 8099       | ENMAN1g        | Endomannosidase (glc1man-producing), Golgi apparatus                          |
| 2098   | 8095       | ENMAN2g        | Endomannosidase (glc2man-producing), Golgi apparatus                          |
| 2099   | 8093       | ENMAN3g        | Endomannosidase (glc3man-producing), Golgi apparatus                          |
| 2100   | 8120       | ENMAN4g        | Endomannosidase (m6masnC-producing), Golgi apparatus                          |
| 2101   | 8123       | ENMAN5g        | Endomannosidase (m6masnB2-producing), Golgi apparatus                         |
| 2102   | 8124       | ENMAN6g        | Endomannosidase (m5masnB1-producing), Golgi apparatus                         |
| 2103   | 266        | ENO            | enolase                                                                       |
| 2104   | 9952       | EPCTX          | ethanolamine-phosphate cytidyltransferase                                     |
| 2105   | 12270      | ESTRADIOLGLCt  | estradiol glucuronide transport via bicarbonate countertransport              |
| 2106   | 12623      | ESTRADIOLGLCt2 | 17-beta-D-glucuronide transport (ATP-dependent)                               |
| 2107   | 19753      | ESTRADIOLGLCtr | glucuronidated compound transport                                             |
| 2108   | 14982      | ESTRADIOLtr    | estradiol intracellular transport                                             |
| 2109   | 19764      | ESTRIOLGLCte   | glucuronidated compound transport                                             |
| 2110   | 19754      | ESTRIOLGLCtr   | glucuronidated compound transport                                             |
| 2111   | 14987      | ESTRIOLtr      | estriol intracellular transport                                               |
| 2112   | 12670      | ESTRONEGLCt    | ABC transporter                                                               |
| 2113   | 19756      | ESTRONEGLCtr   | glucuronidated compound transport                                             |
| 2114   | 12271      | ESTRONESt      | estrone 3-sulfate transport via bicarbonate countertransport                  |
| 2115   | 12620      | ESTRONESt2     | estrone-3-sulfate transport via sodium cotransport                            |
| 2116   | 14983      | ESTRONEtr      | estrone intracellular transport                                               |
| 2117   | 12070      | ESTSULT        | Estrogen sulfotransferase                                                     |
| 2118   | 11580      | ETF            | electron transfer flavoprotein                                                |
| 2119   | 11581      | ETFQO          | Electron transfer flavoprotein-ubiquinone oxidoreductase                      |
| 2120   | 2384       | ETHAK          | Ethanolamine kinase                                                           |

| Column | Reaction # | Abbreviation | Reaction Name                                     |
|--------|------------|--------------|---------------------------------------------------|
| 2121   | 11900      | ETHP         | ethanolamine phosphate phosphatase                |
| 2122   | 19461      | ETOHMO       | ethanol monooxygenase                             |
| 2123   | 1558       | ETOHt        | ethanol reversible transport                      |
| 2124   | 20151      | ETOHtx       | ethanol reversible peroxisomal transport          |
| 2125   | 9639       | FIPGT        | fucose-1-phosphate guanylyltransferase            |
| 2126   | 7758       | F6Tg         | glycoprotein 6-alpha-L-fucosyltransferase         |
| 2127   | 3282       | FA120ACPH    | fatty-acyl-ACP hydrolase                          |
| 2128   | 3283       | FA140ACPH    | fatty-acyl-ACP hydrolase                          |
| 2129   | 3285       | FA141ACPH    | fatty-acyl-ACP hydrolase                          |
| 2130   | 3286       | FA160ACPH    | fatty-acyl-ACP hydrolase                          |
| 2131   | 3289       | FA161ACPH    | fatty-acyl-ACP hydrolase                          |
| 2132   | 3287       | FA180ACPH    | fatty-acyl-ACP hydrolase                          |
| 2133   | 3290       | FA181ACPH    | fatty-acyl-ACP hydrolase                          |
| 2134   | 13580      | FA1821ACPH   | fatty-acyl-ACP hydrolase                          |
| 2135   | 13581      | FA1822ACPH   | fatty-acyl-ACP hydrolase                          |
| 2136   | 3291       | FA182ACPH    | fatty-acyl-ACP hydrolase                          |
| 2137   | 8130       | FACOAL140i   | fatty-acid--CoA ligase (tetradecanoate)           |
| 2138   | 14860      | FACOAL150    | fatty-acid--CoA ligase                            |
| 2139   | 4318       | FACOAL160i   | C160 fatty acid activation                        |
| 2140   | 2894       | FACOAL161    | fatty-acid--CoA ligase (hexadecenoate)            |
| 2141   | 14861      | FACOAL170    | fatty-acid--CoA ligase                            |
| 2142   | 4319       | FACOAL180i   | C180 fatty acid activation                        |
| 2143   | 10279      | FACOAL1812   | fatty-acid--CoA ligase                            |
| 2144   | 10280      | FACOAL1813   | fatty-acid--CoA ligase                            |
| 2145   | 4320       | FACOAL181i   | C181 fatty acid activation                        |
| 2146   | 13577      | FACOAL1821   | fatty-acid--CoA ligase                            |
| 2147   | 10284      | FACOAL1822   | fatty-acid--CoA ligase                            |
| 2148   | 10298      | FACOAL1831   | fatty-acid--CoA ligase                            |
| 2149   | 10299      | FACOAL1832   | fatty-acid--CoA ligase                            |
| 2150   | 10297      | FACOAL184    | fatty-acid--CoA ligase                            |
| 2151   | 14871      | FACOAL191    | fatty-acid--CoA ligase                            |
| 2152   | 10286      | FACOAL200    | fatty-acid--CoA ligase                            |
| 2153   | 10295      | FACOAL203    | fatty-acid--CoA ligase                            |
| 2154   | 10355      | FACOAL204    | fatty-acid--CoA ligase                            |
| 2155   | 10356      | FACOAL2042   | fatty-acid--CoA ligase                            |
| 2156   | 4321       | FACOAL204i   | arachidonic acid activation                       |
| 2157   | 10296      | FACOAL205    | fatty-acid--CoA ligase                            |
| 2158   | 13149      | FACOAL206    | fatty-acid--CoA ligase                            |
| 2159   | 10287      | FACOAL224    | fatty-acid--CoA ligase                            |
| 2160   | 10291      | FACOAL2251   | fatty-acid--CoA ligase                            |
| 2161   | 10292      | FACOAL2252   | fatty-acid--CoA ligase                            |
| 2162   | 14108      | FACOAL226    | fatty-acid--CoA ligase                            |
| 2163   | 4395       | FACOAL226i   | C226 fatty acid activation                        |
| 2164   | 10294      | FACOAL240    | fatty-acid--CoA ligase                            |
| 2165   | 10289      | FACOAL241    | fatty-acid--CoA ligase                            |
| 2166   | 10360      | FACOAL244_1  | fatty-acid--CoA ligase                            |
| 2167   | 10358      | FACOAL245_1  | fatty-acid--CoA ligase                            |
| 2168   | 10359      | FACOAL245_2  | fatty-acid--CoA ligase                            |
| 2169   | 10361      | FACOAL246_1  | fatty-acid--CoA ligase                            |
| 2170   | 10290      | FACOAL260    | fatty-acid--CoA ligase (n-C26:0)                  |
| 2171   | 10777      | FACOAL40im   | fatty-acid--CoA ligase (butanoate), mitochondrial |
| 2172   | 8128       | FACOAL80i    | fatty-acid--CoA ligase (octanoate)                |
| 2173   | 139        | FADDP        | FAD diphosphatase                                 |
| 2174   | 13981      | FADH2tru     | FADH2 transporter, endoplasmic reticulum          |
| 2175   | 13548      | FADH2tx      | FADH2 transporter, peroxisomal                    |
| 2176   | 13976      | FADtru       | FAD transporter, endoplasmic reticulum            |

| Column | Reaction # | Abbreviation  | Reaction Name                                        |
|--------|------------|---------------|------------------------------------------------------|
| 2177   | 13547      | FADtx         | FAD transporter, peroxisomal                         |
| 2178   | 14286      | FAEL183       | fatty-acyl-CoA elongation (n-C18:3CoA)               |
| 2179   | 14288      | FAEL184       | fatty-acyl-CoA elongation (n-C20:4CoA)               |
| 2180   | 14287      | FAEL204       | fatty-acyl-CoA elongation (n-C20:4CoA)               |
| 2181   | 14289      | FAEL205       | fatty-acyl-CoA elongation (n-C20:5CoA)               |
| 2182   | 11774      | FAH1          | Fatty acid omega-hydroxylase                         |
| 2183   | 11776      | FAH2          | Fatty acid omega-hydroxylase                         |
| 2184   | 11778      | FAH3          | Fatty acid omega-hydroxylase                         |
| 2185   | 2373       | FALDH         | formaldehyde dehydrogenase                           |
| 2186   | 20846      | FALDtly       | formaldehyde transport via diffusion (lysosomal)     |
| 2187   | 20465      | FALDtm        | formaldehyde transport via diffusion (mitochondrial) |
| 2188   | 13160      | FAOXC11       | Beta oxidation of long chain fatty acid              |
| 2189   | 20831      | FAOXC140      | Beta oxidation of long chain fatty acid              |
| 2190   | 14353      | FAOXC150m     | Beta oxidation of long chain fatty acid (odd chain)  |
| 2191   | 4214       | FAOXC160      | Beta oxidation of long chain fatty acid              |
| 2192   | 18979      | FAOXC16080m   | Beta oxidation of long chain fatty acid              |
| 2193   | 19002      | FAOXC16080x   | Beta oxidation of long chain fatty acid              |
| 2194   | 20159      | FAOXC161802m  | Beta oxidation fatty acid                            |
| 2195   | 18978      | FAOXC16180m   | Beta oxidation fatty acid                            |
| 2196   | 14354      | FAOXC170m     | Beta oxidation of long chain fatty acid (odd chain)  |
| 2197   | 4216       | FAOXC180      | Beta oxidation of long chain fatty acid              |
| 2198   | 18995      | FAOXC180x     | Beta oxidation of long chain fatty acid              |
| 2199   | 18988      | FAOXC1811601m | Beta oxidation fatty acid                            |
| 2200   | 18989      | FAOXC1811602m | Beta oxidation fatty acid                            |
| 2201   | 18990      | FAOXC1811603m | Beta oxidation fatty acid                            |
| 2202   | 18986      | FAOXC182806m  | Beta oxidation of fatty acid                         |
| 2203   | 18987      | FAOXC18280m   | Beta oxidation of fatty acid                         |
| 2204   | 18984      | FAOXC183803m  | Beta oxidation of fatty acid                         |
| 2205   | 19011      | FAOXC183806m  | Beta oxidation of fatty acid                         |
| 2206   | 19001      | FAOXC183806x  | Beta oxidation of long chain fatty acid              |
| 2207   | 19009      | FAOXC18480m   | Beta oxidation of fatty acid                         |
| 2208   | 19000      | FAOXC18480x   | Beta oxidation of long chain fatty acid              |
| 2209   | 18980      | FAOXC200180m  | Beta oxidation of long chain fatty acid              |
| 2210   | 18998      | FAOXC200180x  | Beta oxidation of long chain fatty acid              |
| 2211   | 18983      | FAOXC2031836m | Beta oxidation of fatty acid                         |
| 2212   | 4285       | FAOXC204      | Beta oxidation of long chain fatty acid              |
| 2213   | 18981      | FAOXC204184m  | Beta oxidation fatty acid                            |
| 2214   | 19006      | FAOXC2051843m | Beta oxidation of fatty acid                         |
| 2215   | 18970      | FAOXC2051843x | Beta oxidation of long chain fatty acid              |
| 2216   | 19008      | FAOXC2242046m | Beta oxidation of long chain fatty acid              |
| 2217   | 18999      | FAOXC2242046x | Beta oxidation of long chain fatty acid              |
| 2218   | 19010      | FAOXC2251836m | Beta oxidation of fatty acid                         |
| 2219   | 18968      | FAOXC2251836x | Beta oxidation of long chain fatty acid              |
| 2220   | 19154      | FAOXC2252053m | Beta oxidation of long chain fatty acid              |
| 2221   | 18997      | FAOXC2252053x | Beta oxidation of long chain fatty acid              |
| 2222   | 4284       | FAOXC226      | Beta oxidation of long chain fatty acid              |
| 2223   | 19005      | FAOXC226205m  | Beta oxidation of long chain fatty acid              |
| 2224   | 18967      | FAOXC226205x  | Beta oxidation of long chain fatty acid              |
| 2225   | 19004      | FAOXC240200x  | Beta oxidation of long chain fatty acid              |
| 2226   | 19003      | FAOXC241181x  | Beta oxidation of long chain fatty acid              |
| 2227   | 18991      | FAOXC2442246x | Beta oxidation of long chain fatty acid              |
| 2228   | 18993      | FAOXC2452253x | Beta oxidation of long chain fatty acid              |
| 2229   | 18992      | FAOXC2452256x | Beta oxidation of long chain fatty acid              |
| 2230   | 18994      | FAOXC246226x  | Beta oxidation of long chain fatty acid              |
| 2231   | 18996      | FAOXC260240x  | Beta oxidation of long chain fatty acid              |
| 2232   | 8333       | FAOXC80       | Beta oxidation of med/long chain fatty acid          |

| Column | Reaction # | Abbreviation | Reaction Name                                             |
|--------|------------|--------------|-----------------------------------------------------------|
| 2233   | 3049       | FAS100COA    | fatty acyl-CoA synthase (n-C10:0CoA)                      |
| 2234   | 3051       | FAS120COA    | fatty-acyl-CoA synthase (n-C12:0CoA)                      |
| 2235   | 3052       | FAS140COA    | fatty-acyl-CoA synthase (n-C14:0CoA)                      |
| 2236   | 3053       | FAS160COA    | fatty-acyl-CoA synthase (n-C16:0CoA)                      |
| 2237   | 3055       | FAS180COA    | fatty-acyl-CoA synthase (n-C18:0CoA)                      |
| 2238   | 3050       | FAS80COA_L   | fatty acyl-CoA synthase (n-C8:0CoA), lumped reaction      |
| 2239   | 12555      | FATP1t       | fatty acid electroneutral transport                       |
| 2240   | 12556      | FATP2t       | fatty acid electroneutral transport                       |
| 2241   | 12557      | FATP3t       | fatty acid electroneutral transport                       |
| 2242   | 12558      | FATP4t       | fatty acid electroneutral transport                       |
| 2243   | 12559      | FATP5t       | fatty acid electroneutral transport                       |
| 2244   | 12560      | FATP6t       | fatty acid electroneutral transport                       |
| 2245   | 12561      | FATP7t       | fatty acid electroneutral transport                       |
| 2246   | 12562      | FATP8t       | fatty acid electroneutral transport                       |
| 2247   | 12563      | FATP9t       | fatty acid electroneutral transport                       |
| 2248   | 268        | FBA          | fructose-bisphosphate aldolase                            |
| 2249   | 2403       | FBA2         | D-Fructose 1-phosphate D-glyceraldehyde-3-phosphate-lyase |
| 2250   | 13867      | FBA4         | D-Fructose 1-phosphate D-glyceraldehyde-3-phosphate-lyase |
| 2251   | 19626      | FBA5         | D-Tagatose 1-phosphate D-glyceraldehyde-3-phosphate-lyase |
| 2252   | 263        | FBP          | fructose-bisphosphatase                                   |
| 2253   | 1040       | FBP26        | Fructose-2,6-bisphosphate 2-phosphatase                   |
| 2254   | 1784       | FCLTm        | Ferrochelataase, mitochondrial                            |
| 2255   | 14878      | FCOAH        | formyl coa hydrolase                                      |
| 2256   | 2846       | FDH          | formate dehydrogenase                                     |
| 2257   | 13175      | FE2t         | iron (II) transport                                       |
| 2258   | 4033       | FE2tm        | iron (II) transport                                       |
| 2259   | 13197      | FE3R2e       | Fe(III) reduction (ascorbate)                             |
| 2260   | 9641       | FK           | Fucokinase                                                |
| 2261   | 2371       | FKYNH        | N-Formyl-L-kynurenine amidohydrolase                      |
| 2262   | 140        | FMNAT        | FMN adenyltransferase                                     |
| 2263   | 8693       | FOLR2        | folate reductase                                          |
| 2264   | 14836      | FOLt2        | folate transport via anion exchange                       |
| 2265   | 14879      | FORMCOAtx    | formyl coa transport                                      |
| 2266   | 14916      | FORt2m       | formate mitochondrial transport                           |
| 2267   | 13990      | FORtr        | FOR transporter, endoplasmic reticulum                    |
| 2268   | 19511      | FORtrn       | Formate transport, nuclear                                |
| 2269   | 11740      | FPGS         | folylpolyglutamate synthetase                             |
| 2270   | 11741      | FPGS2        | folylpolyglutamate synthetase                             |
| 2271   | 11744      | FPGS2m       | folylpolyglutamate synthetase, mitochondrial              |
| 2272   | 11742      | FPGS3        | folylpolyglutamate synthetase                             |
| 2273   | 11745      | FPGS3m       | folylpolyglutamate synthetase, mitochondrial              |
| 2274   | 11746      | FPGS4        | folylpolyglutamate synthetase (DHF)                       |
| 2275   | 11755      | FPGS4m       | folylpolyglutamate synthetase (DHF), mitochondrial        |
| 2276   | 11747      | FPGS5        | folylpolyglutamate synthetase (DHF)                       |
| 2277   | 11756      | FPGS5m       | folylpolyglutamate synthetase (DHF), mitochondrial        |
| 2278   | 11748      | FPGS6        | folylpolyglutamate synthetase (DHF)                       |
| 2279   | 11757      | FPGS6m       | folylpolyglutamate synthetase (DHF), mitochondrial        |
| 2280   | 11749      | FPGS7        | folylpolyglutamate synthetase (10fthf)                    |
| 2281   | 11752      | FPGS7m       | folylpolyglutamate synthetase (10fthf), mitochondrial     |
| 2282   | 11750      | FPGS8        | folylpolyglutamate synthetase (10fthf)                    |
| 2283   | 11753      | FPGS8m       | folylpolyglutamate synthetase (10fthf), mitochondrial     |
| 2284   | 11751      | FPGS9        | folylpolyglutamate synthetase (10fthf)                    |
| 2285   | 11754      | FPGS9m       | folylpolyglutamate synthetase (10fthf), mitochondrial     |

| Column | Reaction # | Abbreviation                                              | Reaction Name                                                                    |
|--------|------------|-----------------------------------------------------------|----------------------------------------------------------------------------------|
| 2286   | 11743      | FPGSm                                                     | folypolyglutamate synthetase, mitochondrial                                      |
| 2287   | 18424      | FRDPtc                                                    | lipid, flip-flop intracellular transport                                         |
| 2288   | 12678      | FRDPtr                                                    | lipid, flip-flop intracellular transport                                         |
| 2289   | 110        | FRTT                                                      | farnesyltranstransferase                                                         |
| 2290   | 11909      | FRUt1r                                                    | D-fructose transport in via uniport                                              |
| 2291   | 12126      | FRUt4                                                     | D-fructose transport via sodium cotransport                                      |
| 2292   | 6137       | FT                                                        | farnesyltranstransferase (trans,trans,cis-geranylgeranyl diphosphate-generating) |
| 2293   | 11759      | FTCD                                                      | formimidoyltransferase cyclodeaminase                                            |
| 2294   | 3757       | FTHFCL                                                    | 5-formethyltetrahydrofolate cyclo-ligase                                         |
| 2295   | 11758      | FTHFDH                                                    | formyltetrahydrofolate dehydrogenase                                             |
| 2296   | 4043       | FTHFL                                                     | formate-tetrahydrofolate ligase                                                  |
| 2297   | 4042       | FTHFLm                                                    | formate-tetrahydrofolate ligase, mitochondrial                                   |
| 2298   | 19667      | FUC13GALACGLCGAL14<br>ACGLCGALGLUSIDEte                   | blood group intracellular transport                                              |
| 2299   | 20166      | FUC13GALACGLCGAL14<br>ACGLCGALGLUSIDEtg                   | blood group intracellular transport                                              |
| 2300   | 19669      | FUC14GALACGLCGALGL<br>USIDEte                             | blood group intracellular transport                                              |
| 2301   | 20167      | FUC14GALACGLCGALGL<br>USIDEtg                             | blood group intracellular transport                                              |
| 2302   | 19671      | FUCACGALFUCGALACG<br>LCGALGLUSIDEte                       | blood group intracellular transport                                              |
| 2303   | 20168      | FUCACGALFUCGALACG<br>LCGALGLUSIDEtg                       | blood group intracellular transport                                              |
| 2304   | 19673      | FUCACNGAL14ACGLCGA<br>LGLUSIDEte                          | blood group intracellular transport                                              |
| 2305   | 20169      | FUCACNGAL14ACGLCGA<br>LGLUSIDEtg                          | blood group intracellular transport                                              |
| 2306   | 19675      | FUCACNGALACGLCGAL<br>GLUSIDEte                            | blood group intracellular transport                                              |
| 2307   | 20170      | FUCACNGALACGLCGAL<br>GLUSIDEtg                            | blood group intracellular transport                                              |
| 2308   | 14588      | FUCASE2e                                                  | alpha-fucosidase, extracellular                                                  |
| 2309   | 14455      | FUCASE2ly                                                 | alpha-fucosidase, lysosomal                                                      |
| 2310   | 8452       | FUCASEe                                                   | alpha-fucosidase, extracellular                                                  |
| 2311   | 8539       | FUCASEly                                                  | alpha-fucosidase, lysosomal                                                      |
| 2312   | 19677      | FUCFUC12GAL14ACGLC<br>GALGLUSIDEte                        | blood group intracellular transport                                              |
| 2313   | 20171      | FUCFUC12GAL14ACGLC<br>GALGLUSIDEtg                        | blood group intracellular transport                                              |
| 2314   | 19679      | FUCFUC132GALACGLCG<br>AL14ACGLCGALGLUSID<br>Ete           | blood group intracellular transport                                              |
| 2315   | 20172      | FUCFUC132GALACGLCG<br>AL14ACGLCGALGLUSID<br>Etg           | blood group intracellular transport                                              |
| 2316   | 19681      | FUCFUCFUCGALACGLC1<br>3GALACGLCGAL14ACGL<br>CGALGLUSIDEte | blood group intracellular transport                                              |
| 2317   | 20173      | FUCFUCFUCGALACGLC1<br>3GALACGLCGAL14ACGL<br>CGALGLUSIDEtg | blood group intracellular transport                                              |
| 2318   | 19686      | FUCFUCFUCGALACGLC<br>GAL14ACGLCGALGLUSI<br>DEte           | blood group intracellular transport                                              |

| Column | Reaction # | Abbreviation                                    | Reaction Name                                                                                 |
|--------|------------|-------------------------------------------------|-----------------------------------------------------------------------------------------------|
| 2319   | 20174      | FUCFUCFUCGALACGLC<br>GAL14ACGLCGALGLUSI<br>DEtg | blood group intracellular transport                                                           |
| 2320   | 19688      | FUCFUCGALACGLCGAL<br>GLUSIDEte                  | blood group intracellular transport                                                           |
| 2321   | 20175      | FUCFUCGALACGLCGAL<br>GLUSIDEtg                  | blood group intracellular transport                                                           |
| 2322   | 19690      | FUCGAL14ACGLCGALGL<br>USIDEte                   | blood group intracellular transport                                                           |
| 2323   | 20176      | FUCGAL14ACGLCGALGL<br>USIDEtg                   | blood group intracellular transport                                                           |
| 2324   | 19692      | FUCGALFUCGALACGLC<br>GALGLUSIDEte               | blood group intracellular transport                                                           |
| 2325   | 20177      | FUCGALFUCGALACGLC<br>GALGLUSIDEtg               | blood group intracellular transport                                                           |
| 2326   | 20227      | FUCGALGBSIDEte                                  | fucgalgbside_hs transport                                                                     |
| 2327   | 20211      | FUCGALGBSIDEtg                                  | fucgalgbside_hs intracellular transport                                                       |
| 2328   | 14921      | FUCtly                                          | L-fucose efflux from lysosome                                                                 |
| 2329   | 542        | FUM                                             | fumarase                                                                                      |
| 2330   | 2670       | FUMAC                                           | fumarylacetoacetase                                                                           |
| 2331   | 20297      | FUMSO3tm                                        | Fumarate:sulfite antiport, mitochondrial                                                      |
| 2332   | 20298      | FUMSO4tm                                        | Fumarate:sulfate antiport, mitochondrial                                                      |
| 2333   | 20247      | FUMTSULtm                                       | Fumarate:thiosulfate antiport, mitochondrial                                                  |
| 2334   | 544        | FUMm                                            | fumarase, mitochondrial                                                                       |
| 2335   | 8364       | FUMtm                                           | fumarate transport, mitochondrial                                                             |
| 2336   | 11070      | FUT11g                                          | Galactoside 2-alpha-L-fucosyltransferase 1                                                    |
| 2337   | 14599      | FUT12g                                          | Galactoside 2-alpha-L-fucosyltransferase 1                                                    |
| 2338   | 14622      | FUT14g                                          | Galactoside 2-alpha-L-fucosyltransferase 1                                                    |
| 2339   | 14635      | FUT15g                                          | Galactoside 2-alpha-L-fucosyltransferase 1                                                    |
| 2340   | 14642      | FUT16g                                          | Galactoside 2-alpha-L-fucosyltransferase 1                                                    |
| 2341   | 14645      | FUT17g                                          | Galactoside 2-alpha-L-fucosyltransferase 1                                                    |
| 2342   | 14663      | FUT18g                                          | Galactoside 2-alpha-L-fucosyltransferase 1                                                    |
| 2343   | 14595      | FUT31g                                          | fucosyltransferase 3 (galactoside 3(4)-L-fucosyltransferase,<br>Lewis blood group included) 1 |
| 2344   | 14598      | FUT32g                                          | fucosyltransferase 3 (galactoside 3(4)-L-fucosyltransferase,<br>Lewis blood group included) 1 |
| 2345   | 14604      | FUT33g                                          | fucosyltransferase 3 (galactoside 3(4)-L-fucosyltransferase,<br>Lewis blood group included) 1 |
| 2346   | 14605      | FUT34g                                          | fucosyltransferase 3 (galactoside 3(4)-L-fucosyltransferase,<br>Lewis blood group included) 1 |
| 2347   | 14606      | FUT35g                                          | fucosyltransferase 3 (galactoside 3(4)-L-fucosyltransferase,<br>Lewis blood group included) 1 |
| 2348   | 14674      | FUT910g                                         | Alpha-(1,3)-fucosyltransferase                                                                |
| 2349   | 14675      | FUT911g                                         | Alpha-(1,3)-fucosyltransferase                                                                |
| 2350   | 14623      | FUT91g                                          | Alpha-(1,3)-fucosyltransferase                                                                |
| 2351   | 14626      | FUT92g                                          | Alpha-(1,3)-fucosyltransferase                                                                |
| 2352   | 14633      | FUT93g                                          | Alpha-(1,3)-fucosyltransferase                                                                |
| 2353   | 14651      | FUT94g                                          | Alpha-(1,3)-fucosyltransferase                                                                |
| 2354   | 14653      | FUT95g                                          | Alpha-(1,3)-fucosyltransferase                                                                |
| 2355   | 14665      | FUT96g                                          | Alpha-(1,3)-fucosyltransferase                                                                |
| 2356   | 14668      | FUT97g                                          | Alpha-(1,3)-fucosyltransferase                                                                |
| 2357   | 14669      | FUT98g                                          | Alpha-(1,3)-fucosyltransferase                                                                |
| 2358   | 14673      | FUT99g                                          | Alpha-(1,3)-fucosyltransferase                                                                |
| 2359   | 7336       | G12MT1_L                                        | Glycolipid 1,2-alpha-D-mannosyltransferase (liver)                                            |
| 2360   | 7337       | G12MT1_U                                        | Glycolipid 1,2-alpha-D-mannosyltransferase (uterus)                                           |
| 2361   | 7338       | G12MT2_L                                        | Glycolipid 1,2-alpha-D-mannosyltransferase (liver)                                            |



| Column | Reaction # | Abbreviation   | Reaction Name                                                               |
|--------|------------|----------------|-----------------------------------------------------------------------------|
| 2362   | 7339       | G12MT2_U       | Glycolipid 1,2-alpha-D-mannosyltransferase (uterus)                         |
| 2363   | 7340       | G13MT_L        | Glycolipid 1,3-alpha-D-mannosyltransferase (liver)                          |
| 2364   | 7341       | G13MT_U        | Glycolipid 1,3-alpha-D-mannosyltransferase (uterus)                         |
| 2365   | 11452      | G14T10g        | beta-N-acetylglucosaminylglycopeptide beta-1,4-galactosyltransferase, Golgi |
| 2366   | 11453      | G14T11g        | beta-N-acetylglucosaminylglycopeptide beta-1,4-galactosyltransferase, Golgi |
| 2367   | 11454      | G14T12g        | beta-N-acetylglucosaminylglycopeptide beta-1,4-galactosyltransferase, Golgi |
| 2368   | 11455      | G14T13g        | beta-N-acetylglucosaminylglycopeptide beta-1,4-galactosyltransferase, Golgi |
| 2369   | 11456      | G14T14g        | beta-N-acetylglucosaminylglycopeptide beta-1,4-galactosyltransferase, Golgi |
| 2370   | 11457      | G14T15g        | beta-N-acetylglucosaminylglycopeptide beta-1,4-galactosyltransferase, Golgi |
| 2371   | 11458      | G14T16g        | beta-N-acetylglucosaminylglycopeptide beta-1,4-galactosyltransferase, Golgi |
| 2372   | 11460      | G14T17g        | beta-N-acetylglucosaminylglycopeptide beta-1,4-galactosyltransferase, Golgi |
| 2373   | 11519      | G14T18g        | beta-N-acetylglucosaminylglycopeptide beta-1,4-galactosyltransferase, Golgi |
| 2374   | 11523      | G14T19g        | beta-N-acetylglucosaminylglycopeptide beta-1,4-galactosyltransferase, Golgi |
| 2375   | 11526      | G14T20g        | beta-N-acetylglucosaminylglycopeptide beta-1,4-galactosyltransferase, Golgi |
| 2376   | 11530      | G14T21g        | beta-N-acetylglucosaminylglycopeptide beta-1,4-galactosyltransferase, Golgi |
| 2377   | 11395      | G14T2g         | beta-N-acetylglucosaminylglycopeptide beta-1,4-galactosyltransferase, Golgi |
| 2378   | 11425      | G14T3g         | beta-N-acetylglucosaminylglycopeptide beta-1,4-galactosyltransferase, Golgi |
| 2379   | 11429      | G14T4g         | beta-N-acetylglucosaminylglycopeptide beta-1,4-galactosyltransferase, Golgi |
| 2380   | 11432      | G14T5g         | beta-N-acetylglucosaminylglycopeptide beta-1,4-galactosyltransferase, Golgi |
| 2381   | 11436      | G14T6g         | beta-N-acetylglucosaminylglycopeptide beta-1,4-galactosyltransferase, Golgi |
| 2382   | 11439      | G14T7g         | beta-N-acetylglucosaminylglycopeptide beta-1,4-galactosyltransferase, Golgi |
| 2383   | 11450      | G14T8g         | beta-N-acetylglucosaminylglycopeptide beta-1,4-galactosyltransferase, Golgi |
| 2384   | 11451      | G14T9g         | beta-N-acetylglucosaminylglycopeptide beta-1,4-galactosyltransferase, Golgi |
| 2385   | 7760       | G14Tg          | beta-N-acetylglucosaminylglycopeptide beta-1,4-galactosyltransferase        |
| 2386   | 7342       | G16MT_L        | Glycolipid 1,6-alpha-D-mannosyltransferase (liver)                          |
| 2387   | 7343       | G16MT_U        | Glycolipid 1,6-alpha-D-mannosyltransferase (uterus)                         |
| 2388   | 8152       | G1M6MASNB1terg | g1m6masnB1 endoplasmic reticulum to Golgi transport                         |
| 2389   | 8119       | G1M7MASNBterg  | g1m7masnC endoplasmic reticulum to Golgi transport                          |
| 2390   | 8118       | G1M7MASNCterg  | g1m7masnC endoplasmic reticulum to Golgi transport                          |
| 2391   | 7753       | G1M8MASNterg   | g1m8masn transport from endoplasmic reticulum to Golgi apparatus            |
| 2392   | 2487       | G1PTT          | glucose-1-phosphate thymidyltransferase                                     |
| 2393   | 8090       | G2M8MASNterg   | g2m8masn transport from endoplasmic reticulum to Golgi apparatus            |

| Column | Reaction # | Abbreviation                             | Reaction Name                                                     |
|--------|------------|------------------------------------------|-------------------------------------------------------------------|
| 2394   | 8091       | G3M8MASNterg                             | g3m8masn transport from endoplasmic reticulum to Golgi apparatus  |
| 2395   | 257        | G3PD1                                    | glycerol-3-phosphate dehydrogenase (NAD)                          |
| 2396   | 13392      | G3PD2m                                   | glycerol-3-phosphate dehydrogenase (FAD), mitochondrial           |
| 2397   | 3649       | G5SADrm                                  | L-glutamate 5-semialdehyde dehydratase, reversible, mitochondrial |
| 2398   | 3635       | G5SADs                                   | L-glutamate 5-semialdehyde dehydratase (spontaneous)              |
| 2399   | 9628       | G5SDym                                   | glutamate-5-semialdehyde dehydrogenase (m)                        |
| 2400   | 246        | G6PDA                                    | glucosamine-6-phosphate deaminase                                 |
| 2401   | 9551       | G6PDH1er                                 | glucose-6-phosphate dehydrogenase, endoplasmic reticulum          |
| 2402   | 10043      | G6PDH1rer                                | glucose-6-phosphate dehydrogenase, endoplasmic reticulum          |
| 2403   | 2941       | G6PDH2r                                  | glucose 6-phosphate dehydrogenase                                 |
| 2404   | 10042      | G6PDH2rer                                | glucose 6-phosphate dehydrogenase, endoplasmic reticulum          |
| 2405   | 6036       | G6PPer                                   | glucose-6-phosphate phosphatase, edoplasmic reticular             |
| 2406   | 2341       | G6Pter                                   | glucose 6-phosphate endoplasmic reticular transport via diffusion |
| 2407   | 11922      | GABAVESSEC                               | GABA secretion via secretory vesicle (ATP driven)                 |
| 2408   | 9723       | GACMTRc                                  | guanidinoacetate N-methyltransferase (c)                          |
| 2409   | 11292      | GACPAILter                               | glucosaminyl-acylphosphatidylinositol ER flippase                 |
| 2410   | 11198      | GAL3ST11                                 | Galactosylceramide sulfotransferase                               |
| 2411   | 11199      | GAL3ST12                                 | Galactosylceramide sulfotransferase                               |
| 2412   | 20228      | GALACGLCGALGBSIDEte                      | galacglcgalgbside_hs transport                                    |
| 2413   | 20212      | GALACGLCGALGBSIDEtg                      | galacglcgalgbside_hs intracellular transport                      |
| 2414   | 14473      | GALASE10ly                               | beta-galactosidase, lysosomal                                     |
| 2415   | 14474      | GALASE11ly                               | beta-galactosidase, lysosomal                                     |
| 2416   | 14475      | GALASE12ly                               | beta-galactosidase, lysosomal                                     |
| 2417   | 14476      | GALASE13ly                               | beta-galactosidase, lysosomal                                     |
| 2418   | 14495      | GALASE14ly                               | beta-galactosidase, lysosomal                                     |
| 2419   | 14497      | GALASE15ly                               | beta-galactosidase, lysosomal                                     |
| 2420   | 14526      | GALASE16ly                               | beta-galactosidase, lysosomal                                     |
| 2421   | 14527      | GALASE17ly                               | beta-galactosidase, lysosomal                                     |
| 2422   | 14528      | GALASE18ly                               | beta-galactosidase, lysosomal                                     |
| 2423   | 14529      | GALASE19ly                               | beta-galactosidase, lysosomal                                     |
| 2424   | 8540       | GALASE1ly                                | beta-galactosidase, lysosomal                                     |
| 2425   | 14530      | GALASE20ly                               | beta-galactosidase, lysosomal                                     |
| 2426   | 14460      | GALASE3ly                                | beta-galactosidase, lysosomal                                     |
| 2427   | 14464      | GALASE4ly                                | beta-galactosidase, lysosomal                                     |
| 2428   | 14468      | GALASE5ly                                | beta-galactosidase, lysosomal                                     |
| 2429   | 14469      | GALASE6ly                                | beta-galactosidase, lysosomal                                     |
| 2430   | 14470      | GALASE7ly                                | beta-galactosidase, lysosomal                                     |
| 2431   | 14471      | GALASE8ly                                | beta-galactosidase, lysosomal                                     |
| 2432   | 14472      | GALASE9ly                                | beta-galactosidase, lysosomal                                     |
| 2433   | 11262      | GALC                                     | Galactocerebrosidase                                              |
| 2434   | 19694      | GALFUC12GAL14ACGLC<br>GALGLUSIDEte       | blood group intracellular transport                               |
| 2435   | 20178      | GALFUC12GAL14ACGLC<br>GALGLUSIDEtg       | blood group intracellular transport                               |
| 2436   | 19696      | GALFUCGALACGLCGAL<br>14ACGLCGALGLUSIDEte | blood group intracellular transport                               |
| 2437   | 20179      | GALFUCGALACGLCGAL<br>14ACGLCGALGLUSIDEtg | blood group intracellular transport                               |

| Column | Reaction # | Abbreviation                                               | Reaction Name                                                                                 |
|--------|------------|------------------------------------------------------------|-----------------------------------------------------------------------------------------------|
| 2438   | 19698      | GALGALFUCFUCGALAC<br>GLCGALACGLCGAL14AC<br>GLCGALGLUSIDEte | blood group intracellular transport                                                           |
| 2439   | 20180      | GALGALFUCFUCGALAC<br>GLCGALACGLCGAL14AC<br>GLCGALGLUSIDEtg | blood group intracellular transport                                                           |
| 2440   | 20229      | GALGALGALTHCRMte                                           | galgalgalthcrm_hs transport                                                                   |
| 2441   | 20213      | GALGALGALTHCRMtg                                           | galgalgalthcrm_hs intracellular transport                                                     |
| 2442   | 20138      | GALGLUSIDEtg                                               | galgluside_hs intracellular transport                                                         |
| 2443   | 20135      | GALGLUSIDEtl                                               | galgluside_hs intracellular transport                                                         |
| 2444   | 11098      | GALGT1                                                     | Beta-1,4 N-acetylgalactosaminyltransferase                                                    |
| 2445   | 11099      | GALGT2                                                     | Beta-1,4 N-acetylgalactosaminyltransferase                                                    |
| 2446   | 11100      | GALGT3                                                     | Beta-1,4 N-acetylgalactosaminyltransferase                                                    |
| 2447   | 11101      | GALGT4                                                     | Beta-1,4 N-acetylgalactosaminyltransferase                                                    |
| 2448   | 2818       | GALK                                                       | galactokinase                                                                                 |
| 2449   | 11559      | GALNACT1g                                                  | UDPGal-chondroitin acetylgalactosaminyltransferase I, Golgi                                   |
| 2450   | 11566      | GALNACT2g                                                  | uridine diphosphoacetylgalactosamine-chondroitin<br>acetylgalactosaminyltransferase II, Golgi |
| 2451   | 11571      | GALNACT3g                                                  | uridine diphosphoacetylgalactosamine-chondroitin<br>acetylgalactosaminyltransferase II, Golgi |
| 2452   | 11575      | GALNACT4g                                                  | uridine diphosphoacetylgalactosamine-chondroitin<br>acetylgalactosaminyltransferase II, Golgi |
| 2453   | 11595      | GALNACT5g                                                  | uridine diphosphoacetylgalactosamine-chondroitin<br>acetylgalactosaminyltransferase II, Golgi |
| 2454   | 8565       | GALNTg                                                     | GalNAc transferase, Golgi apparatus                                                           |
| 2455   | 9927       | GALOR                                                      | D-Galactose:NADP+ 1-oxidoreductase                                                            |
| 2456   | 20331      | GALSIDEtg                                                  | galactocerebroside intracellular transport                                                    |
| 2457   | 20877      | GALSIDEtl                                                  | galactocerebroside intracellular transport                                                    |
| 2458   | 199        | GALT                                                       | galactose-1-phosphate uridylyltransferase                                                     |
| 2459   | 11556      | GALT2g                                                     | UDP-D-galactose:galactosylxylose galactosyltransferase, Golgi<br>apparatus                    |
| 2460   | 11552      | GALTg                                                      | UDP-D-galactose:D-xylose galactosyltransferase, Golgi<br>apparatus                            |
| 2461   | 201        | GALU                                                       | UTP-glucose-1-phosphate uridylyltransferase                                                   |
| 2462   | 11908      | GALt1r                                                     | galactose transport (uniport)                                                                 |
| 2463   | 11964      | GALt2_2                                                    | D-galactose transport via proton symport                                                      |
| 2464   | 12124      | GALt4                                                      | galactose transport via sodium symport                                                        |
| 2465   | 11962      | GALt4_2                                                    | galactose transport via sodium symport                                                        |
| 2466   | 14923      | GALty                                                      | galactose efflux from lysosome                                                                |
| 2467   | 10095      | GAMYe                                                      | glucoamylase, extracellular (glygn5 -> malt)                                                  |
| 2468   | 11907      | GAMt1r                                                     | glucosamine transport (uniport)                                                               |
| 2469   | 11359      | GAO1                                                       | Ganglioside O-acetylation                                                                     |
| 2470   | 12547      | GAO1g                                                      | Ganglioside O-acetylation                                                                     |
| 2471   | 11361      | GAO2                                                       | Ganglioside O-acetylation                                                                     |
| 2472   | 12550      | GAO2g                                                      | Ganglioside O-acetylation                                                                     |
| 2473   | 2841       | GAPD                                                       | glyceraldehyde-3-phosphate dehydrogenase                                                      |
| 2474   | 3637       | GARFT                                                      | phosphoribosylglycinamide formyltransferase                                                   |
| 2475   | 8541       | GASNASE2ly                                                 | glycosylasparaginase, lysosomal                                                               |
| 2476   | 14456      | GASNASE3ly                                                 | glycosylasparaginase, lysosomal                                                               |
| 2477   | 8542       | GASNASEly                                                  | glycosylasparaginase, lysosomal                                                               |
| 2478   | 11394      | GBA                                                        | Glucosylceramidase                                                                            |
| 2479   | 11261      | GBA1                                                       | Glucosylceramidase                                                                            |
| 2480   | 11076      | GBGT1                                                      | globoside alpha-1,3-N-acetylgalactosaminyltransferase 1                                       |
| 2481   | 20328      | GBSIDEte                                                   | globoside transport                                                                           |
| 2482   | 20327      | GBSIDEtl                                                   | globoside intracellular transport                                                             |

| Column | Reaction # | Abbreviation    | Reaction Name                                                        |
|--------|------------|-----------------|----------------------------------------------------------------------|
| 2483   | 1967       | GCALDD          | Glycolaldehyde dehydrogenase                                         |
| 2484   | 10519      | GCALDDm         | Glycolaldehyde dehydrogenase, mitochondrial                          |
| 2485   | 3714       | GCC2am          | glycine-cleavage complex (lipoamide), mitochondrial                  |
| 2486   | 3713       | GCC2bim         | glycine-cleavage system (lipoamide) irreversible, mitochondrial      |
| 2487   | 2283       | GCC2cm          | glycine-cleavage complex (lipoamide), mitochondrial                  |
| 2488   | 3715       | GCCam           | glycine-cleavage complex (lipoylprotein), mitochondrial              |
| 2489   | 3716       | GCCbim          | glycine-cleavage complex (lipoylprotein) irreversible, mitochondrial |
| 2490   | 2282       | GCCcm           | glycine-cleavage complex (lipoylprotein), mitochondrial              |
| 2491   | 12267      | GCHOLAt         | glycocholate transport via bicarbonate countertransport              |
| 2492   | 12618      | GCHOLAt2        | glycocholate transport via sodium cotransport                        |
| 2493   | 12669      | GCHOLAt3        | ABC bile acid transporter                                            |
| 2494   | 19651      | GCHOLAtc        | bile acid intracellular transport                                    |
| 2495   | 19652      | GCHOLAtx        | bile acid intracellular transport                                    |
| 2496   | 14660      | GCNTg           | N-acetyllactosaminide beta-1,6-N-acetylglucosaminyl-transferase      |
| 2497   | 20230      | GD1B2te         | gd1b2_hs transport                                                   |
| 2498   | 20214      | GD1B2tg         | gd1b2_hs intracellular transport                                     |
| 2499   | 20231      | GD1Cte          | gd1c_hs transport                                                    |
| 2500   | 20215      | GD1Ctg          | gd1c_hs intracellular transport                                      |
| 2501   | 19653      | GDCHOLAtc       | bile acid intracellular transport                                    |
| 2502   | 19654      | GDCHOLAtx       | bile acid intracellular transport                                    |
| 2503   | 12156      | GDPFUCtg        | GDPFuc Golgi transport via CMP antiport                              |
| 2504   | 20334      | GDPtg           | GDP intracellular transport                                          |
| 2505   | 3537       | GF6PTA          | glutamine-fructose-6-phosphate transaminase                          |
| 2506   | 5638       | GFUCS           | GDP-L-fucose synthase                                                |
| 2507   | 14854      | GGH-10FTHF5GLUe | Gamma-glutamyl hydrolase (10FTHF5GLU), extracellular                 |
| 2508   | 14855      | GGH-10FTHF5GLU1 | Gamma-glutamyl hydrolase (10FTHF5GLU), lysosomal                     |
| 2509   | 14856      | GGH-10FTHF6GLUe | Gamma-glutamyl hydrolase (10FTHF6GLU), extracellular                 |
| 2510   | 14857      | GGH-10FTHF6GLU1 | Gamma-glutamyl hydrolase (10FTHF6GLU), lysosomal                     |
| 2511   | 14859      | GGH-10FTHF7GLUe | Gamma-glutamyl hydrolase (10FTHF7GLU), extracellular                 |
| 2512   | 14858      | GGH-10FTHF7GLU1 | Gamma-glutamyl hydrolase (10FTHF7GLU), lysosomal                     |
| 2513   | 14848      | GGH-5DHF        | Gamma-glutamyl hydrolase (5DHF), extracellular                       |
| 2514   | 14849      | GGH-5DHF1       | Gamma-glutamyl hydrolase (5DHF), lysosomal                           |
| 2515   | 14847      | GGH-5THF        | Gamma-glutamyl hydrolase (5THF), extracellular                       |
| 2516   | 14846      | GGH-5THF1       | Gamma-glutamyl hydrolase (5THF), lysosomal                           |
| 2517   | 14850      | GGH-6DHF        | Gamma-glutamyl hydrolase (6DHF), extracellular                       |
| 2518   | 14851      | GGH-6DHF1       | Gamma-glutamyl hydrolase (6DHF), lysosomal                           |
| 2519   | 14845      | GGH-6THF        | Gamma-glutamyl hydrolase (6THF), extracellular                       |
| 2520   | 14844      | GGH-6THF1       | Gamma-glutamyl hydrolase (6THF), lysosomal                           |
| 2521   | 14852      | GGH-7DHF        | Gamma-glutamyl hydrolase (7DHF), extracellular                       |
| 2522   | 14853      | GGH-7DHF1       | Gamma-glutamyl hydrolase (7DHF), lysosomal                           |
| 2523   | 14843      | GGH-7THF        | Gamma-glutamyl hydrolase (7THF), extracellular                       |
| 2524   | 14842      | GGH-7THF1       | Gamma-glutamyl hydrolase (7THF), lysosomal                           |
| 2525   | 11537      | GGLUCT          | gamma-glutamylcyclotransferase                                       |
| 2526   | 10093      | GGNG            | glycogenin self-glucosylation                                        |
| 2527   | 10002      | GGT5r           | Gamma-glutamyltransferase 5                                          |
| 2528   | 19812      | GGT6            | Gamma-glutamyltransferase                                            |
| 2529   | 7410       | GGT_L           | geranylgeranyltransferase (liver)                                    |
| 2530   | 7546       | GGT_U           | geranylgeranyltransferase (uterus)                                   |
| 2531   | 1584       | GHMT2r          | glycine hydroxymethyltransferase, reversible                         |
| 2532   | 1583       | GHMT2rm         | glycine hydroxymethyltransferase, reversible, mitochondrial          |
| 2533   | 11404      | GHMT3           | glycine hydroxymethyltransferase                                     |
| 2534   | 11405      | GHMT3m          | glycine hydroxymethyltransferase, mitochondrial                      |

| Column | Reaction # | Abbreviation | Reaction Name                                                                                    |
|--------|------------|--------------|--------------------------------------------------------------------------------------------------|
| 2535   | 186        | GK1          | guanylate kinase (GMP:ATP)                                                                       |
| 2536   | 20323      | GK1m         | guanylate kinase (GMP:ATP), mitochondrial                                                        |
| 2537   | 10177      | GLACO        | D-Glucuronolactone:NAD+ oxidoreductase                                                           |
| 2538   | 10178      | GLACOm       | D-Glucuronolactone:NAD+ oxidoreductase, mitochondrial                                            |
| 2539   | 13768      | GLACter      | D-glucurono-6,3-lactone transport, endoplasmic reticulum                                         |
| 2540   | 11275      | GLAI         | galactosidase, alpha                                                                             |
| 2541   | 11264      | GLB1         | Beta-galactosidase                                                                               |
| 2542   | 10067      | GLBRAN       | 1,4-alpha-glucan branching enzyme (glygn1 -> glygn2)                                             |
| 2543   | 11722      | GLCAASE1ly   | beta-glucuronidase, lysosomal                                                                    |
| 2544   | 14406      | GLCAASE4ly   | beta-glucuronidase, lysosomal                                                                    |
| 2545   | 14422      | GLCAASE5ly   | beta-glucuronidase, lysosomal                                                                    |
| 2546   | 14436      | GLCAASE6ly   | beta-glucuronidase, lysosomal                                                                    |
| 2547   | 14448      | GLCAASE7ly   | beta-glucuronidase, lysosomal                                                                    |
| 2548   | 14549      | GLCAASE8ly   | beta-glucuronidase, lysosomal                                                                    |
| 2549   | 14552      | GLCAASE9ly   | beta-glucuronidase, lysosomal                                                                    |
| 2550   | 11626      | GLCAE1g      | chondroitin-glucuronate 5-epimerase                                                              |
| 2551   | 11627      | GLCAE2g      | heparosan-N-sulfate-glucuronate 5-epimerase                                                      |
| 2552   | 11565      | GLCAT2g      | chondroitin glucuronyltransferase II, Golgi apparatus                                            |
| 2553   | 11570      | GLCAT3g      | chondroitin glucuronyltransferase II, Golgi apparatus                                            |
| 2554   | 11574      | GLCAT4g      | chondroitin glucuronyltransferase II, Golgi apparatus                                            |
| 2555   | 11594      | GLCAT5g      | chondroitin glucuronyltransferase II, Golgi apparatus                                            |
| 2556   | 11612      | GLCAT6g      | heparan glucuronyltransferase II                                                                 |
| 2557   | 11617      | GLCAT7g      | heparan glucuronyltransferase II                                                                 |
| 2558   | 11618      | GLCAT8g      | heparan glucuronyltransferase II                                                                 |
| 2559   | 11619      | GLCAT9g      | heparan glucuronyltransferase II                                                                 |
| 2560   | 11557      | GLCATg       | UDP-D-glucuronate:galactosylgalactosylxylose glucuronosyltransferase, Golgi apparatus            |
| 2561   | 11812      | GLCMter      | glucose transport via membrane vesicle                                                           |
| 2562   | 11715      | GLCNACASE1ly | alpha-N-acetylglucosaminidase, lysosomal                                                         |
| 2563   | 11720      | GLCNACASE2ly | alpha-N-acetylglucosaminidase, lysosomal                                                         |
| 2564   | 11730      | GLCNACASE3ly | alpha-N-acetylglucosaminidase, lysosomal                                                         |
| 2565   | 11731      | GLCNACASE4ly | alpha-N-acetylglucosaminidase, lysosomal                                                         |
| 2566   | 11766      | GLCNACASE5ly | alpha-N-acetylglucosaminidase, lysosomal                                                         |
| 2567   | 11624      | GLCNACDASg   | GlcNAc N-deacetylase / N-sulfotransferase                                                        |
| 2568   | 7329       | GLCNACPT_L   | UDP-GlcNAc:dolichol-phosphate GlcNAc phosphotransferase (liver)                                  |
| 2569   | 7330       | GLCNACPT_U   | UDP-GlcNAc:dolichol-phosphate GlcNAc phosphotransferase (uterus)                                 |
| 2570   | 14968      | GLCNACT1g    | alpha-N-acetylglucosaminyltransferase I, Golgi apparatus                                         |
| 2571   | 11613      | GLCNACT2g    | alpha-N-acetylglucosaminyltransferase II                                                         |
| 2572   | 11614      | GLCNACT3g    | alpha-N-acetylglucosaminyltransferase II                                                         |
| 2573   | 11615      | GLCNACT4g    | alpha-N-acetylglucosaminyltransferase II                                                         |
| 2574   | 11616      | GLCNACT5g    | alpha-N-acetylglucosaminyltransferase II                                                         |
| 2575   | 7331       | GLCNACT_L    | UDP-GlcNAc:N-acetyl-D-glucosaminyl diphosphodolichol N-acetyl-D-glucosaminyltransferase (liver)  |
| 2576   | 7332       | GLCNACT_U    | UDP-GlcNAc:N-acetyl-D-glucosaminyl diphosphodolichol N-acetyl-D-glucosaminyltransferase (uterus) |
| 2577   | 13435      | GLCURter     | glucuronate endoplasmic reticular transport                                                      |
| 2578   | 13784      | GLCURtly     | glucuronate transport into lysosome                                                              |
| 2579   | 11809      | GLCt1r       | glucose transport (uniport)                                                                      |
| 2580   | 11963      | GLCt2_2      | D-glucose transport in via proton symport                                                        |
| 2581   | 11967      | GLCt2r       | D-glucose transport in via proton symport                                                        |
| 2582   | 12112      | GLCt4        | glucose transport via sodium symport                                                             |
| 2583   | 11961      | GLCt4_2      | glucose transport via sodium symport                                                             |
| 2584   | 10014      | GLCter       | glucose transport, endoplasmic reticulum                                                         |
| 2585   | 13532      | GLCtg        | glucose transport, Golgi apparatus                                                               |

| Column | Reaction # | Abbreviation | Reaction Name                                                      |
|--------|------------|--------------|--------------------------------------------------------------------|
| 2586   | 14920      | GLCtly       | glucose efflux from lysosome                                       |
| 2587   | 10070      | GLDBRAN      | glycogen debranching enzyme                                        |
| 2588   | 10066      | GLGNS1       | glycogen synthase (ggn -> glygn1)                                  |
| 2589   | 11848      | GLNALANaEx   | L-alanine/L-glutamine Na-dependent exchange (Gln-L in)             |
| 2590   | 11863      | GLNASNNaEx   | L-glutamine/L-asparagine Na-dependent exchange (Gln-L in)          |
| 2591   | 11856      | GLNCYSNaEx   | L-cysteine/L-glutamine Na-dependent exchange (Gln-L in)            |
| 2592   | 10194      | GLNLASEer    | gluconolactonase, endoplasmic reticulum                            |
| 2593   | 3539       | GLNS         | glutamine synthetase                                               |
| 2594   | 11852      | GLNSERNaEx   | L-serine/L-glutamine Na-dependent exchange (Gln-L in)              |
| 2595   | 11860      | GLNTHRNAEx   | L-threonine/L-glutamine Na-dependent exchange (Gln-L in)           |
| 2596   | 11698      | GLNt4        | L-glutamine reversible transport via sodium symport                |
| 2597   | 11673      | GLNtN1       | Glutamine transport (Na, H coupled)                                |
| 2598   | 11980      | GLNtm        | L-glutamine transport via electroneutral transporter               |
| 2599   | 10068      | GLPASE1      | glycogen phosphorylase (glygn2 -> dxtrn)                           |
| 2600   | 10094      | GLPASE2      | glycogen phosphorylase (amyls -> glc-D)                            |
| 2601   | 10276      | GLRASE       | glucuronolactone reductase                                         |
| 2602   | 9630       | GLU5Km       | glutamate 5-kinase (m)                                             |
| 2603   | 3540       | GLUCYS       | gamma-glutamylcysteine synthetase                                  |
| 2604   | 2960       | GLUDC        | Glutamate Decarboxylase                                            |
| 2605   | 9365       | GLUDxm       | glutamate dehydrogenase (NAD) (mitochondrial)                      |
| 2606   | 9366       | GLUDym       | glutamate dehydrogenase (NADP), mitochondrial                      |
| 2607   | 9368       | GLUNm        | glutaminase (mitochondrial)                                        |
| 2608   | 3542       | GLUPRT       | glutamine phosphoribosyldiphosphate amidotransferase               |
| 2609   | 9501       | GLUTCOADHm   | glutaryl-CoA dehydrogenase (mitochondria)                          |
| 2610   | 11910      | GLUVESSEC    | L-glutamate secretion via secretory vesicle (ATP driven)           |
| 2611   | 1509       | GLUt2m       | L-glutamate reversible transport via proton symport, mitochondrial |
| 2612   | 11820      | GLUt6        | Glutamate transport via Na, H symport and K antiport               |
| 2613   | 14915      | GLUt7l       | Glutamate transport, lysosomal                                     |
| 2614   | 19801      | GLUtr        | intracellular transport                                            |
| 2615   | 10459      | GLXO1        | glyoxylate oxidase                                                 |
| 2616   | 13862      | GLXO2p       | glyoxylate oxidase, peroxisomal                                    |
| 2617   | 13858      | GLXtm        | glyoxylate transport, mitochondrial                                |
| 2618   | 1526       | GLXtp        | glyoxylate transport, peroxisomal                                  |
| 2619   | 9722       | GLYAMDTRc    | glycine amidinotransferase (c)                                     |
| 2620   | 9642       | GLYATm       | glycine C-acetyltransferase                                        |
| 2621   | 11948      | GLYBt4(2)r   | Betaine transport (sodium symport) (2:1)                           |
| 2622   | 13322      | GLYBtm       | Glycine betaine transport via diffusion (mitochondria to cytosol)  |
| 2623   | 20239      | GLYC-St      | L-glycerate export                                                 |
| 2624   | 1930       | GLYC3Ptm     | glycerol-3-phosphate shuttle                                       |
| 2625   | 6159       | GLYCK2       | glycerate kinase                                                   |
| 2626   | 2128       | GLYCLTDy     | Glycolate dehydrogenase (NADP)                                     |
| 2627   | 13863      | GLYCLTDym    | Glycolate dehydrogenase (NADP), mitochondrial                      |
| 2628   | 19517      | GLYCLTtp     | glycolate transport into peroxisome                                |
| 2629   | 10489      | GLYCTO1p     | Glycolate oxidase, peroxisome                                      |
| 2630   | 1551       | GLYct        | glycerol transport via channel                                     |
| 2631   | 4023       | GLYctm       | glycerol transport                                                 |
| 2632   | 256        | GLYK         | glycerol kinase                                                    |
| 2633   | 4419       | GLYKm        | glycerol kinase                                                    |
| 2634   | 455        | GLYOX        | hydroxyacylglutathione hydrolase                                   |
| 2635   | 456        | GLYOXm       | hydroxyacylglutathione hydrolase, mitochondrial                    |
| 2636   | 10251      | GLYOp        | glycine oxidase, perioxosomal                                      |
| 2637   | 11920      | GLYVESSEC    | Glycine secretion via secretory vesicle (ATP driven)               |
| 2638   | 1362       | GLYt2r       | glycine reversible transport via proton symport                    |

| Column | Reaction # | Abbreviation | Reaction Name                                                        |
|--------|------------|--------------|----------------------------------------------------------------------|
| 2639   | 11683      | GLYt2rL      | glycine reversible transport via proton symport (lysosome)           |
| 2640   | 11690      | GLYt4        | glycine transport via sodium symport                                 |
| 2641   | 11943      | GLYt7(211)r  | glycine reversible transport via sodium and chloride symport (2:1:1) |
| 2642   | 11944      | GLYt7(311)r  | glycine reversible transport via sodium and chloride symport (3:1:1) |
| 2643   | 4037       | GLYtm        | glycine passive transport to mitochondria                            |
| 2644   | 14021      | GLYtp        | glycine passive transport to peroxisome                              |
| 2645   | 2304       | GMAND        | GDP-D-mannose dehydratase                                            |
| 2646   | 3543       | GMPR         | GMP reductase                                                        |
| 2647   | 2926       | GMPS2        | GMP synthase                                                         |
| 2648   | 19549      | GMPtn        | GMP nuclear transport                                                |
| 2649   | 2843       | GND          | phosphogluconate dehydrogenase                                       |
| 2650   | 20143      | GNDer        | phosphogluconate dehydrogenase, endoplasmic reticulum                |
| 2651   | 9862       | GNMT         | glycine N-methyltransferase                                          |
| 2652   | 20233      | GP1CALPHAtc  | gp1calpha_hs transport                                               |
| 2653   | 20217      | GP1CALPHAtg  | gp1calpha_hs intracellular transport                                 |
| 2654   | 20232      | GP1Ctc       | gp1c_hs transport                                                    |
| 2655   | 20216      | GP1Ctg       | gp1c_hs intracellular transport                                      |
| 2656   | 14777      | GPAM_hs      | glycerol-3-phosphate acyltransferase                                 |
| 2657   | 14780      | GPAMm_hs     | glycerol-3-phosphate acyltransferase                                 |
| 2658   | 2531       | GPDDA1       | Glycerophosphodiester phosphodiesterase (Glycerophosphocholine)      |
| 2659   | 11280      | GPIAT        | glucosaminylphosphatidyl inositol acetyltransferase                  |
| 2660   | 11341      | GPIDA2er     | glycophosphatidylinositol (GPI) deacylase, endoplasmic reticulum     |
| 2661   | 11340      | GPIDAer      | glycophosphatidylinositol (GPI) deacylase, endoplasmic reticulum     |
| 2662   | 11283      | GPIMTer_L    | GlcN-acylPI mannosyltransferase, endoplasmic reticulum               |
| 2663   | 11350      | GPIMTer_U    | GlcN-acylPI mannosyltransferase, endoplasmic reticulum               |
| 2664   | 20235      | GQ1BALPHAtc  | gq1balpha_hs transport                                               |
| 2665   | 20219      | GQ1BALPHAtg  | gq1balpha_hs intracellular transport                                 |
| 2666   | 20234      | GQ1Btc       | gq1b_hs transport                                                    |
| 2667   | 20218      | GQ1Btg       | gq1b_hs intracellular transport                                      |
| 2668   | 109        | GRTT         | geranyltranstransferase                                              |
| 2669   | 9742       | GRTTx        | geranyltranstransferase                                              |
| 2670   | 20317      | GSNKm        | guanosine kinase (mitochondrial)                                     |
| 2671   | 12542      | GSNt         | guanosine facilitated transport in cytosol                           |
| 2672   | 12095      | GSNt4        | guanosine transport in via sodium symport                            |
| 2673   | 12096      | GSNt5        | guanosine transport in via sodium (1:2) symport                      |
| 2674   | 12578      | GSNtl        | guanosine facilitated transport from lysosome                        |
| 2675   | 12147      | GSNtm        | guanosine facilitated transport in mitochondria                      |
| 2676   | 20236      | GT1Ate       | gt1a_hs transport                                                    |
| 2677   | 20220      | GT1Atg       | gt1a_hs intracellular transport                                      |
| 2678   | 10201      | GTHDH        | Glutathione dehydrogenase (dehydroascorbate reductase)               |
| 2679   | 1411       | GTHO         | glutathione oxidoreductase                                           |
| 2680   | 4913       | GTHOm        | glutathione oxidoreductase                                           |
| 2681   | 1410       | GTHP         | glutathione perioxidase                                              |
| 2682   | 10878      | GTHPe        | glutathione peroxidase (e)                                           |
| 2683   | 4914       | GTHPm        | glutathione peroxidase, mitochondria                                 |
| 2684   | 4912       | GTHRDt       | Glutathione transport into mitochondria                              |
| 2685   | 19804      | GTHRDtr      | glutathione transport via diffusion                                  |
| 2686   | 3545       | GTHS         | glutathione synthetase                                               |
| 2687   | 11539      | GTMLTe       | g-glutamyltransferase (e)                                            |
| 2688   | 7819       | GTPCI        | GTP cyclohydrolase I                                                 |
| 2689   | 11635      | GTPCIn       | GTP cyclohydrolase I, nuclear                                        |

| Column | Reaction # | Abbreviation | Reaction Name                                               |
|--------|------------|--------------|-------------------------------------------------------------|
| 2690   | 14147      | GTPtn        | GTP diffusion in nucleus                                    |
| 2691   | 10076      | GUACYC       | guanylate cyclase                                           |
| 2692   | 3312       | GUAD         | guanine deaminase                                           |
| 2693   | 2808       | GUAPRT       | guanine phosphoribosyltransferase                           |
| 2694   | 2102       | GUAt         | Guanine transport                                           |
| 2695   | 13433      | GULLACter    | gulonolactone endoplasmic reticular transport               |
| 2696   | 10152      | GULN3D       | L-gulonate 3-dehydrogenase                                  |
| 2697   | 10189      | GULNDer      | gulonate dehydrogenase, endoplasmic reticulum               |
| 2698   | 13439      | GULNter      | L-gulonate endoplasmic reticular export                     |
| 2699   | 13430      | GUR1PP       | Glucuronate 1-phosphate phosphatase                         |
| 2700   | 9367       | GluForTx     | Glutamate formimidoyltransferase                            |
| 2701   | 4415       | H2CO3D       | carboxylic acid dissociation                                |
| 2702   | 6253       | H2CO3D2      | carboxylic acid dissociation                                |
| 2703   | 20852      | H2CO3D2m     | carboxylic acid dissociation, mitochondrial                 |
| 2704   | 4417       | H2CO3Dm      | carboxylic acid dissociation                                |
| 2705   | 11302      | H2ETer       | H2 phosphoethanolaminyl transferase, endoplasmic reticulum  |
| 2706   | 11285      | H2MTer_L     | H2 mannosyltransferase, endoplasmic reticulum               |
| 2707   | 11351      | H2MTer_U     | H2 mannosyltransferase, endoplasmic reticulum               |
| 2708   | 13679      | H2O2syn      | Hydrogen peroxide synthesis (NADPH dependent)               |
| 2709   | 20854      | H2O2t        | hydrogen peroxide transport via diffusion                   |
| 2710   | 13514      | H2O2tly      | hydrogen peroxide lysosomal transport via diffusion         |
| 2711   | 20853      | H2O2tm       | hydrogen peroxide mitochondrial transport                   |
| 2712   | 19550      | H2O2tn       | hydrogen peroxide nuclear transport                         |
| 2713   | 1282       | H2O2tp       | hydrogen peroxide peroxisomal transport via diffusion       |
| 2714   | 868        | H2Ot         | H2O transport via diffusion                                 |
| 2715   | 2159       | H2Oter       | H2O endoplasmic reticulum transport                         |
| 2716   | 13512      | H2Otg        | H2O transport, Golgi apparatus                              |
| 2717   | 13513      | H2Otly       | H2O transport, lysosomal                                    |
| 2718   | 875        | H2Otm        | H2O transport, mitochondrial                                |
| 2719   | 777        | H2Otn        | H2O transport, nuclear                                      |
| 2720   | 2153       | H2Otp        | H2O transport, peroxisomal                                  |
| 2721   | 11306      | H3ETer       | H3 phosphoethanolaminyl transferase, endoplasmic reticulum  |
| 2722   | 11305      | H3MTer_L     | H3 mannosyltransferase, endoplasmic reticulum               |
| 2723   | 11352      | H3MTer_U     | H3 mannosyltransferase, endoplasmic reticulum               |
| 2724   | 11308      | H4ET3er      | H4 phosphoethanolaminyl transferase, endoplasmic reticulum  |
| 2725   | 11307      | H4ETer       | H4 phosphoethanolaminyl transferase, endoplasmic reticulum  |
| 2726   | 11303      | H5MTer_L     | H5 mannosyltransferase, endoplasmic reticulum               |
| 2727   | 11353      | H5MTer_U     | H5 mannosyltransferase, endoplasmic reticulum               |
| 2728   | 11309      | H6'ET2er     | H6' phosphoethanolaminyl transferase, endoplasmic reticulum |
| 2729   | 11310      | H6'ETer      | H6' phosphoethanolaminyl transferase, endoplasmic reticulum |
| 2730   | 11313      | H6ET3er      | H6 phosphoethanolaminyl transferase, endoplasmic reticulum  |
| 2731   | 11344      | H6MTer_L     | H6 mannosyltransferase, endoplasmic reticulum               |
| 2732   | 11354      | H6MTer_U     | H6 mannosyltransferase, endoplasmic reticulum               |
| 2733   | 11315      | H7'ETer      | H7' phosphoethanolaminyl transferase, endoplasmic reticulum |
| 2734   | 11338      | H7'TAer      | H7' transamidase, endoplasmic reticulum                     |
| 2735   | 11314      | H7ET2er      | H7 phosphoethanolaminyl transferase, endoplasmic reticulum  |
| 2736   | 11345      | H7MTer_L     | H7 mannosyltransferase, endoplasmic reticulum               |



| Column | Reaction # | Abbreviation  | Reaction Name                                                            |
|--------|------------|---------------|--------------------------------------------------------------------------|
| 2737   | 11355      | H7Mter_U      | H7 mannosyltransferase, endoplasmic reticulum                            |
| 2738   | 11346      | H8Mter_L      | H8 mannosyltransferase, endoplasmic reticulum                            |
| 2739   | 11356      | H8Mter_U      | H8 mannosyltransferase, endoplasmic reticulum                            |
| 2740   | 11337      | H8TAer        | H8 transamidase, endoplasmic reticulum                                   |
| 2741   | 9505       | HACD1m        | 3-hydroxyacyl-CoA dehydrogenase (acetoacetyl-CoA) (mitochondria)         |
| 2742   | 9506       | HACD1x        | 3-hydroxyacyl-CoA dehydrogenase (acetoacetyl-CoA) (peroxisome)           |
| 2743   | 10918      | HACD9m        | 3-hydroxyacyl-CoA dehydrogenase (2-Methylacetoacetyl-CoA), mitochondrial |
| 2744   | 14547      | HAS1          | hyaluronan synthase                                                      |
| 2745   | 14546      | HAS2          | hyaluronan synthase                                                      |
| 2746   | 14967      | HAtly         | hyaluronan transport, extracellular to lysosome                          |
| 2747   | 11090      | HBZOPT10m     | Hydroxybenzoate Decaprenyltransferase                                    |
| 2748   | 2911       | HCO3Em        | HCO3 equilibration reaction                                              |
| 2749   | 12045      | HCO3_CLt      | bicarbonate transport (Cl-/HCO3- exchange)                               |
| 2750   | 12049      | HCO3_NAt      | bicarbonate transport (Na/HCO3 cotransport)                              |
| 2751   | 19716      | HCOUMARINte   | xenobiotic transport                                                     |
| 2752   | 20131      | HDCAter       | palmitate ER export                                                      |
| 2753   | 12444      | HDCAtr        | fatty acid transport via diffusion                                       |
| 2754   | 12445      | HDCEAtr       | fatty acid transport via diffusion                                       |
| 2755   | 20160      | HDD2COAtx     | hdd2coa intracellular transport                                          |
| 2756   | 19758      | HESTRATRIOLte | hydroxylated estrogen derivative transport                               |
| 2757   | 19757      | HESTRATRIOLtr | hydroxylated estrogen derivative transport                               |
| 2758   | 2842       | HEX1          | hexokinase (D-glucose:ATP)                                               |
| 2759   | 671        | HEX10         | hexokinase (D-glucosamine:ATP)                                           |
| 2760   | 666        | HEX4          | hexokinase (D-mannose:ATP)                                               |
| 2761   | 669        | HEX7          | hexokinase (D-fructose:ATP)                                              |
| 2762   | 19030      | HEXCCOAtx     | fatty acid intracellular transport                                       |
| 2763   | 19092      | HEXCCPT1      | carnitine O-palmitoyltransferase                                         |
| 2764   | 19111      | HEXCCPT2      | carnitine transferase                                                    |
| 2765   | 19073      | HEXCCRNt      | transport into the mitochondria (carnitine)                              |
| 2766   | 12459      | HEXCt         | fatty acid transport via diffusion                                       |
| 2767   | 2672       | HGNTOR        | Homogentisate:oxygen 1,2-oxidoreductase (decyclizing)                    |
| 2768   | 10418      | HIBDm         | 3-hydroxyisobutyrate dehydrogenase, mitochondrial                        |
| 2769   | 380        | HISD          | histidase                                                                |
| 2770   | 7384       | HISDC         | histidine decarboxylase                                                  |
| 2771   | 10535      | HISTASE       | Histaminase                                                              |
| 2772   | 11934      | HISTAVESSEC   | Histamine secretion via secretory vesicle (ATP driven)                   |
| 2773   | 12193      | HISTAtu       | Histamine uniport                                                        |
| 2774   | 11700      | HISi4         | L-histidine transport in via sodium symport                              |
| 2775   | 11671      | HISiN1        | Histidine transport (Na, H coupled)                                      |
| 2776   | 11696      | HISiDF        | L-histidine transport via diffusion (extracellular to cytosol)           |
| 2777   | 2668       | HKYNH         | 3-Hydroxy-L-kynurenine hydrolase                                         |
| 2778   | 7098       | HKt           | H+/K+ gastric/non-gastric P-ATPase and ABC ATPase                        |
| 2779   | 4          | HMBS          | hydroxymethylbilane synthase                                             |
| 2780   | 9732       | HMGCOARr      | Hydroxymethylglutaryl CoA reductase (ir)                                 |
| 2781   | 9733       | HMGCOARx      | Hydroxymethylglutaryl CoA reductase (ir)                                 |
| 2782   | 6785       | HMGCOASi      | Hydroxymethylglutaryl CoA synthase (ir)                                  |
| 2783   | 9720       | HMGCOASim     | Hydroxymethylglutaryl CoA synthase (ir)                                  |
| 2784   | 1933       | HMGCOAtm      | Hydroxymethylglutaryl-CoA reversible mitochondrial transport             |
| 2785   | 14000      | HMGCOAtx      | Hydroxymethylglutaryl-CoA reversible peroxisomal transport               |
| 2786   | 4424       | HMGLm         | hydroxymethylglutaryl-CoA lyase                                          |
| 2787   | 9731       | HMGLx         | hydroxymethylglutaryl-CoA lyase                                          |

| Column | Reaction # | Abbreviation | Reaction Name                                                                |
|--------|------------|--------------|------------------------------------------------------------------------------|
| 2788   | 11705      | HOMt4        | L-homoserine via sodium symport                                              |
| 2789   | 11915      | HOXG         | Heme oxygenase 1                                                             |
| 2790   | 14451      | HPACtr       | hydroxyphenylacetate transport via diffusion                                 |
| 2791   | 14103      | HPCLx        | 2-hydroxyphytanoyl-CoA lyase                                                 |
| 2792   | 14865      | HPDCACRNCPT1 | carnitine fatty-acyl transferase                                             |
| 2793   | 14866      | HPDCACRNCPT2 | heptadecanoate transport into the mitochondria                               |
| 2794   | 14868      | HPDCACRNt    | heptadecanoate transport into the mitochondria                               |
| 2795   | 19805      | HPDCAt       | fatty acid transport via diffusion                                           |
| 2796   | 3560       | HPROxm       | L-hydroxyproline dehydrogenase (NAD), mitochondrial                          |
| 2797   | 10518      | HPYRDC       | hydroxypyruvate decarboxylase                                                |
| 2798   | 13864      | HPYRDCm      | hydroxypyruvate decarboxylase, mitochondrial                                 |
| 2799   | 10505      | HPYRR2x      | hydroxypyruvate reductase (NADH)                                             |
| 2800   | 2130       | HPYRRy       | Hydroxypyruvate reductase (NADPH)                                            |
| 2801   | 14022      | HPYRtp       | hydroxypyruvate transport, peroxisomal                                       |
| 2802   | 15088      | HRETNtn      | 4-hydroxyretinoic acid transport, Nuclear                                    |
| 2803   | 14390      | HS1ly        | heparan-N-sulfatase, lysosomal                                               |
| 2804   | 14395      | HS2ly        | heparan-N-sulfatase, lysosomal                                               |
| 2805   | 14396      | HS3ly        | heparan-N-sulfatase, lysosomal                                               |
| 2806   | 14397      | HS4ly        | heparan-N-sulfatase, lysosomal                                               |
| 2807   | 14575      | HSAT1ly      | heparan-glucosaminide N-acetyltransferase, lysosomal                         |
| 2808   | 14574      | HSAT2ly      | heparan-glucosaminide N-acetyltransferase, lysosomal                         |
| 2809   | 14572      | HSAT3ly      | heparan-glucosaminide N-acetyltransferase, lysosomal                         |
| 2810   | 14571      | HSAT4ly      | heparan-glucosaminide N-acetyltransferase, lysosomal                         |
| 2811   | 11435      | HSD11B1r     | 11-beta-hydroxysteroid dehydrogenase type 1                                  |
| 2812   | 11434      | HSD11B2r     | 11-beta-hydroxysteroid dehydrogenase type 2                                  |
| 2813   | 9943       | HSD17B1      | testicular 17-beta-hydroxysteroid dehydrogenase                              |
| 2814   | 14989      | HSD17B2r     | 17-beta-hydroxysteroid dehydrogenase                                         |
| 2815   | 9966       | HSD17B3r     | testicular 17-beta-hydroxysteroid dehydrogenase                              |
| 2816   | 13934      | HSD17B42x    | hydroxysteroid (17-beta) dehydrogenase 4                                     |
| 2817   | 9679       | HSD17B4x     | hydroxysteroid (17-beta) dehydrogenase 4                                     |
| 2818   | 9971       | HSD17B7r     | testicular 17-beta-hydroxysteroid dehydrogenase                              |
| 2819   | 14991      | HSD17B8r     | 17-beta-hydroxysteroid dehydrogenase                                         |
| 2820   | 20867      | HSD17B9r     | 17-beta-hydroxysteroid dehydrogenase (type 7)                                |
| 2821   | 20864      | HSD3A1r      | 3 alpha-hydroxysteroid dehydrogenase (type 3)                                |
| 2822   | 20865      | HSD3A2r      | 3 alpha-hydroxysteroid dehydrogenase (type 3)                                |
| 2823   | 9874       | HSD3B11      | 3 beta-hydroxysteroid dehydrogenase/delta 5-->4-isomerase type I             |
| 2824   | 9967       | HSD3B11r     | 3 beta-hydroxysteroid dehydrogenase/delta 5-->4-isomerase type I             |
| 2825   | 9968       | HSD3B12r     | 3 beta-hydroxysteroid dehydrogenase/delta 5-->4-isomerase type I             |
| 2826   | 9878       | HSD3B13      | 3 beta-hydroxysteroid dehydrogenase/delta 5-->4-isomerase type I             |
| 2827   | 9969       | HSD3B13r     | 3 beta-hydroxysteroid dehydrogenase/delta 5-->4-isomerase type I             |
| 2828   | 20869      | HSD3B2r      | 3 beta-hydroxysteroid dehydrogenase type 1                                   |
| 2829   | 20870      | HSD3B3r      | 3 beta-hydroxysteroid dehydrogenase type 1                                   |
| 2830   | 9648       | HSD3B7       | hydroxy-delta-5-steroid dehydrogenase, 3 beta- and steroid delta-isomerase 7 |
| 2831   | 9649       | HSD3B7P      | hydroxy-delta-5-steroid dehydrogenase, 3 beta- and steroid delta-isomerase 7 |
| 2832   | 11770      | HSPASEly     | heparan sulfate proteoglycan protease, lysosome (endosome)                   |
| 2833   | 14965      | HSPGt        | heparan sulfate transport, golgi to extracellular                            |
| 2834   | 14966      | HSPGtly      | heparan sulfate transport, extracellular to lysosome                         |
| 2835   | 19718      | HTAXOLte     | xenobiotic transport                                                         |

| Column | Reaction # | Abbreviation    | Reaction Name                                                   |
|--------|------------|-----------------|-----------------------------------------------------------------|
| 2836   | 12576      | HXANtl          | hypoxanthine facilitated transport from lysosome                |
| 2837   | 14088      | HXANtx          | hypoxanthine diffusion in peroxisome                            |
| 2838   | 441        | HXPRT           | hypoxanthine phosphoribosyltransferase (Hypoxanthine)           |
| 2839   | 1732       | HYP OE          | hypothetical enzyme                                             |
| 2840   | 11001      | HYP TROX        | Hypotaurine oxidase                                             |
| 2841   | 1155       | HYX Nt          | Hypoxanthine transport                                          |
| 2842   | 5333       | Htm             | Uncoupling protein                                              |
| 2843   | 13967      | Htr             | H transporter, endoplasmic reticulum                            |
| 2844   | 13997      | Htx             | H transporter, peroxisome                                       |
| 2845   | 486        | ICDHxm          | Isocitrate dehydrogenase (NAD+)                                 |
| 2846   | 3109       | ICDH y          | isocitrate dehydrogenase (NADP)                                 |
| 2847   | 489        | ICDHyp          | Isocitrate dehydrogenase (NADP+)                                |
| 2848   | 10041      | ICDH yrm        | Isocitrate dehydrogenase (NADP+)                                |
| 2849   | 13661      | IDHPOXOX2b      | Iodide:hydrogen-peroxide oxidoreductase 2                       |
| 2850   | 9459       | IDHPOXOX3       | Iodide:hydrogen-peroxide oxidoreductase 3                       |
| 2851   | 9461       | IDHPOXOX4       | Iodide:hydrogen-peroxide oxidoreductase 4                       |
| 2852   | 13660      | IDHPOXOXb       | Iodide:hydrogen-peroxide oxidoreductase                         |
| 2853   | 11716      | IDO AASE1ly     | alpha-L-iduronidase, lysosomal                                  |
| 2854   | 11735      | IDO AASE2ly     | alpha-L-iduronidase, lysosomal                                  |
| 2855   | 11736      | IDO AASE3ly     | alpha-L-iduronidase, lysosomal                                  |
| 2856   | 14416      | IDO AASE4ly     | alpha-L-iduronidase, lysosomal                                  |
| 2857   | 14925      | IDOURtly        | iduronate transport into lysosomes                              |
| 2858   | 19546      | IDPtn           | IDP nuclear transport                                           |
| 2859   | 319        | I LETA          | isoleucine transaminase                                         |
| 2860   | 1326       | I LETA m        | isoleucine transaminase, mitochondrial                          |
| 2861   | 11949      | I L E t4        | L-isoleucine transport in via sodium symport                    |
| 2862   | 12595      | I L E t5 m      | Isoleucine mitochondrial transport                              |
| 2863   | 11925      | I L E tec       | L-isoleucine transport via diffusion (extracellular to cytosol) |
| 2864   | 9351       | I M A C T D     | Imidazole acetaldehyde dehydrogenase                            |
| 2865   | 9352       | I M A C T D _m  | Imidazole acetaldehyde dehydrogenase (mito)                     |
| 2866   | 399        | I M P C         | IMP cyclohydrolase                                              |
| 2867   | 400        | I M P D         | IMP dehydrogenase                                               |
| 2868   | 10921      | I N O S T O     | inositol oxygenase                                              |
| 2869   | 20321      | I N S K m       | inosine kinase, mitochondrial                                   |
| 2870   | 11960      | I N S T t2r     | inositol transport in via proton symport                        |
| 2871   | 12113      | I N S T t4      | inositol transport via sodium symport                           |
| 2872   | 12128      | I N S T t4 _2   | inositol transport via sodium symport                           |
| 2873   | 2574       | I N S t         | Inosine transport (diffusion)                                   |
| 2874   | 12093      | I N S t4        | inosine transport in via sodium symport                         |
| 2875   | 12094      | I N S t5        | inosine transport in via sodium (1:2) symport                   |
| 2876   | 12573      | I N S t l       | inosine facilitated transport from lysosome                     |
| 2877   | 12538      | I N S t m       | inosine facilitated transport in mitochondria                   |
| 2878   | 9737       | I P D D I x     | isopentenyl-diphosphate D-isomerase                             |
| 2879   | 6236       | I T C O A L 1 m | Itaconate--CoA ligase (GDP-forming), mitochondrial              |
| 2880   | 3271       | I T C O A L m   | Itaconate--CoA ligase (ADP-forming), mitochondrial              |
| 2881   | 19547      | I T P t n       | ITP nuclear transport                                           |
| 2882   | 7861       | I Z P N         | imidazolonepropionase                                           |
| 2883   | 12127      | I t             | Iodide uniport                                                  |
| 2884   | 6648       | K A S 8         | b-ketoacyl synthetase (palmitate, n-C16:0)                      |
| 2885   | 13052      | K C C 2 t       | K+-Cl- cotransporter (NH4+)                                     |
| 2886   | 13051      | K C C t         | K+-Cl- cotransport                                              |
| 2887   | 10646      | K D N H         | 2-keto-3deoxy-D-glycero-D-galactonic acid phosphohydrolase      |
| 2888   | 9644       | K H K           | ketoheksokinase                                                 |
| 2889   | 13865      | K H K 2         | ketoheksokinase (D-xylulose)                                    |

| Column | Reaction # | Abbreviation  | Reaction Name                                                     |
|--------|------------|---------------|-------------------------------------------------------------------|
| 2890   | 19624      | KHK3          | ketoheksokinase (D-tagatose)                                      |
| 2891   | 14960      | KSII_CORE2t   | keratan sulfate II (core2) transport, golgi to extracellular      |
| 2892   | 14963      | KSII_CORE2tly | keratan sulfate II (core 2) transport, extracellular to lysosome  |
| 2893   | 14961      | KSII_CORE4t   | keratan sulfate II (core4) transport, golgi to extracellular      |
| 2894   | 14964      | KSII_CORE4tly | keratan sulfate II (core 4) transport, extracellular to lysosome  |
| 2895   | 14959      | KSIt          | keratan sulfate I transport, golgi to extracellular               |
| 2896   | 14962      | KSItly        | keratan sulfate I transport, extracellular to lysosome            |
| 2897   | 2675       | KYN           | kynureninase                                                      |
| 2898   | 3489       | KYN3OX        | kynurenine 3-monooxygenase                                        |
| 2899   | 9507       | KYNAKGAT      | L-Kynurenine:2-oxoglutarate aminotransferase                      |
| 2900   | 11610      | KYNATESYN     | 4-(2-Aminophenyl)-2,4-dioxobutanoate dehydratase                  |
| 2901   | 12674      | Kt3g          | potassium transport via proton antiport                           |
| 2902   | 18718      | L-LACDcm      | L-Lactate dehydrogenase, cytosolic/mitochondrial                  |
| 2903   | 1552       | L-LACt2r      | L-lactate reversible transport via proton symport                 |
| 2904   | 12474      | L-LACt4r      | L-lactate reversible transport via sodium symport                 |
| 2905   | 14450      | L-LACtcm      | L-lactate transport via diffusion (cytosol to mitochondria)       |
| 2906   | 1295       | L-LACtm       | L-lactate transport, mitochondrial                                |
| 2907   | 9889       | LACZe         | b-galactosidase, extracellular                                    |
| 2908   | 9883       | LACZly        | b-galactosidase, lysosomal                                        |
| 2909   | 9623       | LALDD         | D-lactaldehyde dehydrogenase                                      |
| 2910   | 9624       | LALDO         | D-Lactaldehyde:NAD+ oxidoreductase (glutathione-formylating)      |
| 2911   | 9625       | LALDO2        | D-Lactaldehyde:NADP+ 1-oxidoreductase                             |
| 2912   | 20016      | LALDO2x       | D-Lactaldehyde:NAD+ 1-oxidoreductase                              |
| 2913   | 14654      | LAPCOA1       | lysosomal acid phosphorylase (CoA)                                |
| 2914   | 2949       | LCADi         | lactaldehyde dehydrogenase                                        |
| 2915   | 14171      | LCADi_D       | lactaldehyde dehydrogenase                                        |
| 2916   | 14176      | LCADi_Dm      | lactaldehyde dehydrogenase, mitochondrial                         |
| 2917   | 14174      | LCADim        | lactaldehyde dehydrogenase, mitochondrial                         |
| 2918   | 14712      | LCAT1e        | Lecithin-cholesterol acyltransferase                              |
| 2919   | 19513      | LCTStg        | lactose transport from Golgi to extracellular (via vesicle)       |
| 2920   | 19514      | LCTStl        | lactose transport from cytosol to lysosome (via autophagocytosis) |
| 2921   | 14564      | LCYSTAT       | L-Cysteate:2-oxoglutarate aminotransferase                        |
| 2922   | 14565      | LCYSTATm      | L-Cysteate:2-oxoglutarate aminotransferase, mitochondrial         |
| 2923   | 9860       | LCYSTCBOXL    | 3-Sulfoalanine carboxy-lyase                                      |
| 2924   | 293        | LDH_D         | D-lactate dehydrogenase                                           |
| 2925   | 2847       | LDH_L         | L-lactate dehydrogenase                                           |
| 2926   | 4416       | LDH_Lm        | L-lactate dehydrogenase                                           |
| 2927   | 19798      | LEUKTRA4tr    | leukotriene intracellular transport                               |
| 2928   | 19799      | LEUKTRB4tr    | leukotriene intracellular transport                               |
| 2929   | 12274      | LEUKTRC4t     | leukotriene C4 transport via bicarbonate countertransport         |
| 2930   | 19809      | LEUKTRD4tr    | leukotriene intracellular transport                               |
| 2931   | 82         | LEUTA         | leucine transaminase                                              |
| 2932   | 705        | LEUTAm        | leucine transaminase, mitochondrial                               |
| 2933   | 11693      | LEUt4         | L-leucine transport in via sodium symport                         |
| 2934   | 12594      | LEUt5m        | leucine mitochondrial transport                                   |
| 2935   | 11924      | LEUtec        | L-leucine transport via diffusion (extracellular to cytosol)      |
| 2936   | 10872      | LFORKYNHYD    | L-Formylkynurenine hydrolase                                      |
| 2937   | 19031      | LGNCCOAtx     | fatty acid intracellular transport                                |
| 2938   | 19091      | LGNCCPT1      | carnitine O-palmitoyltransferase                                  |
| 2939   | 19110      | LGNCCPT2      | transport into the mitochondria (carnitine)                       |
| 2940   | 19072      | LGNCCRNt      | transport into the mitochondria (carnitine)                       |
| 2941   | 12463      | LGNCT         | fatty acid transport via diffusion                                |

| Column | Reaction # | Abbreviation | Reaction Name                                               |
|--------|------------|--------------|-------------------------------------------------------------|
| 2942   | 457        | LGTHL        | lactoylglutathione lyase                                    |
| 2943   | 20193      | LIMNENte     | xenobiotic transport                                        |
| 2944   | 14387      | LINKDEG1ly   | degradation of proteoglycan linkage region, lysosomal       |
| 2945   | 14417      | LINKDEG2ly   | degradation of proteoglycan linkage region, lysosomal       |
| 2946   | 14427      | LINKDEG3ly   | degradation of proteoglycan linkage region, lysosomal       |
| 2947   | 14449      | LINKDEG4ly   | degradation of proteoglycan linkage region, lysosomal       |
| 2948   | 10481      | LIPoi        | Lipoate transport via sodium symport                        |
| 2949   | 19096      | LNELDCCPT1   | carnitine O-palmitoyltransferase                            |
| 2950   | 19115      | LNELDCCPT2   | carnitine transferase                                       |
| 2951   | 19077      | LNELDCCRnt   | transport into the mitochondria (carnitine)                 |
| 2952   | 12454      | LNELDCt      | fatty acid transport via diffusion                          |
| 2953   | 19097      | LNLCCPT1     | carnitine O-palmitoyltransferase                            |
| 2954   | 19116      | LNLCCPT2     | carnitine transferase                                       |
| 2955   | 19078      | LNLCCRnt     | transport into the mitochondria (carnitine)                 |
| 2956   | 13579      | LNLCT        | Linoleic acid (n-C18:2) transport in via diffusion          |
| 2957   | 19099      | LNLNCACPT1   | carnitine O-palmitoyltransferase                            |
| 2958   | 19118      | LNLNCACPT2   | carnitine transferase                                       |
| 2959   | 19080      | LNLNCACRNt   | transport into the mitochondria (carnitine)                 |
| 2960   | 12452      | LNLNCAAt     | fatty acid transport via diffusion                          |
| 2961   | 19098      | LNLNCGCPT1   | carnitine O-palmitoyltransferase                            |
| 2962   | 19117      | LNLNCGCPT2   | carnitine transferase                                       |
| 2963   | 19079      | LNLNCGCRnt   | transport into the mitochondria (carnitine)                 |
| 2964   | 12451      | LNLNCGt      | fatty acid transport via diffusion                          |
| 2965   | 3410       | LNS14DM      | cytochrome P450 lanosterol 14-alpha-demethylase (NADP)      |
| 2966   | 9753       | LNS14DMr     | cytochrome P450 lanosterol 14-alpha-demethylase             |
| 2967   | 9748       | LNSTLSr      | lanosterol synthase                                         |
| 2968   | 10860      | LPASE        | lysophospholipase                                           |
| 2969   | 9936       | LPCOXp       | L-pipecolate oxidase, peroxisomal                           |
| 2970   | 14378      | LPS          | lipase                                                      |
| 2971   | 14366      | LPS2         | lipase                                                      |
| 2972   | 14367      | LPS2e        | lipase, extracellular                                       |
| 2973   | 14368      | LPS3         | lipase                                                      |
| 2974   | 14369      | LPS3e        | lipase, extracellular                                       |
| 2975   | 14374      | LPS4e        | phospholipase                                               |
| 2976   | 14379      | LPSe         | lipase                                                      |
| 2977   | 15060      | LRAT         | Lecithin retinol acyltransferase                            |
| 2978   | 15108      | LRAT1        | Lecithin retinol acyltransferase (11-cis)                   |
| 2979   | 15107      | LRAT2        | Lecithin retinol acyltransferase (9-cis)                    |
| 2980   | 11320      | LS3          | Lumisterol 3 formation                                      |
| 2981   | 9771       | LSTO1r       | Lathosterol oxidase                                         |
| 2982   | 9772       | LSTO2r       | Lathosterol oxidase                                         |
| 2983   | 9998       | LTA4H        | Leukotriene A-4 hydrolase                                   |
| 2984   | 19811      | LTC4CP       | Leukotriene C4 carboxypeptidase                             |
| 2985   | 19803      | LTC4Sr       | Leukotriene C4 synthase                                     |
| 2986   | 19808      | LT4DP        | Leukotriene D4 dipeptidase                                  |
| 2987   | 9580       | LTDCCL       | L-Tryptophan decarboxy-lyase                                |
| 2988   | 11026      | LYSMTF1n     | histone-lysine N-methyltransferase, nuclear                 |
| 2989   | 11027      | LYSMTF2n     | histone-lysine N-methyltransferase, nuclear                 |
| 2990   | 11028      | LYSMTF3n     | histone-lysine N-methyltransferase, nuclear                 |
| 2991   | 12661      | LYSOXp       | L-lysine oxidase, peroxisomal                               |
| 2992   | 11953      | LYSt4        | L-lysine transport in via sodium symport                    |
| 2993   | 11697      | LYStiDF      | L-lysine transport via diffusion (extracellular to cytosol) |
| 2994   | 12950      | LYStip       | L-lysine transport, peroxisomal (irreversible)              |
| 2995   | 5290       | LYStm        | Lysine mitochondrial transport via ornithine carrier        |
| 2996   | 14827      | LYStn        | L-lysine transport, nuclear                                 |
| 2997   | 7754       | M1316Mg      | mannosyl-oligosaccharide 1,3-1,6-alpha-mannosidase          |

| Column | Reaction # | Abbreviation | Reaction Name                                                          |
|--------|------------|--------------|------------------------------------------------------------------------|
| 2998   | 7711       | M13N2Tg      | alpha-1,3-mannosyl-glycoprotein 2-beta-N-acetylglucosaminyltransferase |
| 2999   | 7770       | M13N4Tg      | alpha-1,3-mannosyl-glycoprotein 4-beta-N-acetylglucosaminyltransferase |
| 3000   | 7769       | M14NTg       | beta-1,4-mannosyl-glycoprotein 4-beta-N-acetylglucosaminyltransferase  |
| 3001   | 7772       | M16N4Tg      | alpha-1,6-mannosyl-glycoprotein 4-beta-N-acetylglucosaminyltransferase |
| 3002   | 7771       | M16N6Tg      | alpha-1,6-mannosyl-glycoprotein 6-beta-N-acetylglucosaminyltransferase |
| 3003   | 7756       | M16NTg       | alpha-1,6-mannosyl-glycoprotein 2-beta-N-acetylglucosaminyltransferase |
| 3004   | 11348      | M4ATAer      | M4A transamidase, endoplasmic reticulum                                |
| 3005   | 11343      | M4BET2er     | M4B phosphoethanolaminyl transferase, endoplasmic reticulum            |
| 3006   | 11347      | M4BTAer      | M4B transamidase, endoplasmic reticulum                                |
| 3007   | 11342      | M4CET3er     | M4C phosphoethanolaminyl transferase, endoplasmic reticulum            |
| 3008   | 8051       | M4MPDOL_Lter | m4mpdol flippase                                                       |
| 3009   | 8052       | M4MPDOL_Uter | m4mpdol flippase                                                       |
| 3010   | 7718       | M7MASNBterg  | m7masnB transport from endoplasmic reticulum to Golgi apparatus        |
| 3011   | 8054       | M8MASNterg   | m8masn transport from ER to Golgi apparatus                            |
| 3012   | 2669       | MACACI       | maleylacetoacetate isomerase                                           |
| 3013   | 9358       | MACOXO       | 3-Methylimidazole acetaldehyde:NAD+ oxidoreductase                     |
| 3014   | 20296      | MALSO3tm     | Malate:sulfite antiport, mitochondrial                                 |
| 3015   | 20299      | MALSO4tm     | Malate:sulfate antiport, mitochondrial                                 |
| 3016   | 690        | MALT         | alpha-glucosidase                                                      |
| 3017   | 20248      | MALTSULtm    | Malate:thiosulfate antiport, mitochondrial                             |
| 3018   | 9993       | MALTe        | alpha-glucosidase, extracellular                                       |
| 3019   | 9992       | MALTly       | alpha-glucosidase, lysosomal                                           |
| 3020   | 11912      | MALTt1r      | maltose transport (uniport)                                            |
| 3021   | 985        | MALtm        | malate transport, mitochondrial                                        |
| 3022   | 2536       | MAN1PT2      | mannose-1-phosphate guanylyltransferase (GDP)                          |
| 3023   | 8116       | MAN1_6B1er   | mannosidase I, endoplasmic reticulum (g1m6masnB1-producing)            |
| 3024   | 8114       | MAN1_7Ber    | mannosidase I, endoplasmic reticulum (g1m7masnB-producing)             |
| 3025   | 8117       | MAN2_6B1er   | mannosidase II, endoplasmic reticulum (g1m6masnB1-producing)           |
| 3026   | 8115       | MAN2_7Cer    | mannosidase II, endoplasmic reticulum (g1m7masnC-producing)            |
| 3027   | 244        | MAN6PI       | mannose-6-phosphate isomerase                                          |
| 3028   | 11905      | MANt1r       | mannose transport (uniport)                                            |
| 3029   | 12125      | MANt4        | D-mannose transport via sodium cotransport                             |
| 3030   | 15052      | MANter       | mannose efflux from endoplasmic reticulum                              |
| 3031   | 15051      | MANtg        | mannose efflux from Golgi apparatus                                    |
| 3032   | 14924      | MANtly       | mannose efflux from lysosome                                           |
| 3033   | 9399       | MAOLNOR      | monoamine oxidase (L-Normetanephine)                                   |
| 3034   | 13484      | MAOX         | Methylamine oxidase                                                    |
| 3035   | 10429      | MCCCrn       | methylcrotonoyl-CoA carboxylase, mitochondrial                         |
| 3036   | 9550       | MCD          | Malonyl-CoA Decarboxylase cytoplasmic                                  |
| 3037   | 8386       | MCDm         | Malonyl-CoA Decarboxylase, mitochondrial                               |
| 3038   | 9549       | MCDp         | Malonyl-CoA Decarboxylase peroxisomal                                  |
| 3039   | 2250       | MCITS        | 2-methylcitrate synthase                                               |
| 3040   | 20240      | MCLACCYSR    | 3-mercaptolactate:cysteine reductase                                   |

| Column | Reaction # | Abbreviation   | Reaction Name                                                           |
|--------|------------|----------------|-------------------------------------------------------------------------|
| 3041   | 10179      | MCLOR          | 3-Mercaptolactate:NAD <sup>+</sup> oxidoreductase                       |
| 3042   | 3441       | MCOATA         | Malonyl-CoA-ACP transacylase                                            |
| 3043   | 3337       | MCOATAm        | Malonyl-CoA-ACP transacylase, mitochondrial                             |
| 3044   | 13722      | MCPST          | 3-mercaptopyruvate sulfurtransferase                                    |
| 3045   | 541        | MDH            | malate dehydrogenase                                                    |
| 3046   | 543        | MDHm           | malate dehydrogenase, mitochondrial                                     |
| 3047   | 1630       | MDRPD          | 5-Methylthio-5-deoxy-D-ribulose 1-phosphate dehydratase                 |
| 3048   | 2942       | ME1m           | malic enzyme (NAD), mitochondrial                                       |
| 3049   | 2848       | ME2            | malic enzyme (NADP)                                                     |
| 3050   | 540        | ME2m           | malic enzyme (NADP), mitochondrial                                      |
| 3051   | 10809      | MECOALm        | mesaconate--CoA ligase (ADP-forming), mitochondrial                     |
| 3052   | 10810      | MECOAS1m       | mesaconate--CoA ligase (GDP-forming)                                    |
| 3053   | 9609       | MELATN23DOX    | Melatonin:oxygen 2,3-dioxygenase (indole-decyclizing)                   |
| 3054   | 9608       | MELATNOX       | Melatonin:NADP oxidoreductase                                           |
| 3055   | 7721       | MEOHt2         | Methanol diffusion                                                      |
| 3056   | 20845      | MEOHtly        | Methanol transporter, lysosome                                          |
| 3057   | 13985      | MEOHtr         | Methanol transporter, endoplasmic reticulum                             |
| 3058   | 20192      | MEPIVESSte     | metanephrine secretion via secretory vesicle (ATP driven)               |
| 3059   | 20241      | MERCOPLACCYSSt | 3-mercaptolactate-cysteine disulfide transport, extracellular           |
| 3060   | 10816      | MESCOALm       | Mesaconyl-CoA pyruvate-lyase                                            |
| 3061   | 369        | METAT          | methionine adenosyltransferase                                          |
| 3062   | 11871      | METLEUex       | Methionine/Leucine exchange (Met in)                                    |
| 3063   | 7846       | METS           | methionine synthase                                                     |
| 3064   | 11699      | METt4          | L-methionine transport in via sodium symport                            |
| 3065   | 11927      | METtec         | L-methionine transport via diffusion (extracellular to cytosol)         |
| 3066   | 9734       | MEVK1x         | mevalonate kinase (atp)                                                 |
| 3067   | 7633       | MG1er          | mannosyl-oligosaccharide glucosidase, endoplasmic reticulum             |
| 3068   | 7634       | MG2er          | mannosyl-oligosaccharide glucosidase, endoplasmic reticulum             |
| 3069   | 7636       | MG3er          | mannosyl-oligosaccharide glucosidase, endoplasmic reticulum             |
| 3070   | 10814      | MGACONm        | methylglutaconase, mitochondrial                                        |
| 3071   | 10907      | MGCHrm         | methylglutaconyl-CoA hydratase (reversible), mitochondrial              |
| 3072   | 269        | MGSA           | methylglyoxal synthase                                                  |
| 3073   | 14084      | MGSA2          | methylglyoxylate synthase 2 (from g3p)                                  |
| 3074   | 9356       | MHISOR         | N-Methylhistamine:oxygen oxidoreductase (deaminating)                   |
| 3075   | 10936      | MI13456PK      | inositol-1,3,4,5,6-pentakisphosphate 2-kinase                           |
| 3076   | 19594      | MI13456Ptn     | inositol 1,3,4,5,6-pentakisphosphate nuclear transport (diffusion)      |
| 3077   | 10980      | MI1345PKn      | inositol-1,3,4,5-triphosphate 6-kinase, nucleus                         |
| 3078   | 10930      | MI1345PP       | inositol-1,3,4,5-trisphosphate 5-phosphatase                            |
| 3079   | 10977      | MI1346PKn      | inositol-1,3,4,6-tetrakisphosphate 5-kinase, nucleus                    |
| 3080   | 19572      | MI1346Ptn      | 1D-myo-Inositol 1,3,4,6-tetrakisphosphate nuclear transport (diffusion) |
| 3081   | 11035      | MI134P4P       | inositol-1,3,4-trisphosphate 4-phosphatase                              |
| 3082   | 10933      | MI134PK        | inositol-1,3,4-trisphosphate 6-kinase                                   |
| 3083   | 10928      | MI134PP        | inositol-1,3,4-trisphosphate 1-phosphatase                              |
| 3084   | 10927      | MI13PP         | inositol-1,3-bisphosphate 3-phosphatase                                 |
| 3085   | 10981      | MI1456PKn      | inositol-1,4,5,6-tetrakisphosphate 3-kinase, nucleus                    |
| 3086   | 10978      | MI145P6Kn      | inositol-1,4,5-triphosphate 6-kinase, nucleus                           |
| 3087   | 10932      | MI145PK        | inositol-1,4,5-trisphosphate 3-kinase                                   |
| 3088   | 10979      | MI145PKn       | inositol-1,4,5-trisphosphate 3-kinase, nucleus                          |
| 3089   | 10929      | MI145PP        | inositol-1,4,5-trisphosphate 5-phosphatase                              |

| Column | Reaction # | Abbreviation | Reaction Name                                                                   |
|--------|------------|--------------|---------------------------------------------------------------------------------|
| 3090   | 11036      | MI14P4P      | inositol-1,4-bisphosphate 4-phosphatase                                         |
| 3091   | 10925      | MI14PP       | inositol-1,4-bisphosphate 1-phosphatase                                         |
| 3092   | 19573      | MI14Ptn      | inositol 1,4-bisphosphate nuclear transport (diffusion)                         |
| 3093   | 19575      | MI1P-Dtn     | inositol 1-phosphate nuclear transport (diffusion)                              |
| 3094   | 2540       | MI1PP        | myo-inositol 1-phosphatase                                                      |
| 3095   | 2656       | MI1PS        | myo-Inositol-1-phosphate synthase                                               |
| 3096   | 10935      | MI3456PK     | inositol-3,4,5,6-tetrakisphosphate 1-kinase                                     |
| 3097   | 10926      | MI34PP       | inositol-3,4-bisphosphate 4-phosphatase                                         |
| 3098   | 10923      | MI3PP        | myo-inositol 3-phosphatase                                                      |
| 3099   | 10924      | MI4PP        | myo-inositol 4-phosphatase                                                      |
| 3100   | 20161      | MICITDr      | 2-methylisocitrate dehydratase                                                  |
| 3101   | 19592      | MINOHPtn     | inositol hexakisphosphate nuclear transport (diffusion)                         |
| 3102   | 2513       | MLTG1        | Maltodextrin glucosidase (maltotriose)                                          |
| 3103   | 9995       | MLTG1e       | Maltodextrin glucosidase (maltotriose), extracellular                           |
| 3104   | 9994       | MLTG1ly      | Maltodextrin glucosidase (maltotriose), lysosome                                |
| 3105   | 7704       | MM5ag        | mannosyl-oligosaccharide 1,2-alpha-mannosidase, Golgi apparatus                 |
| 3106   | 7697       | MM5bg        | mannosyl-oligosaccharide 1,2-alpha-mannosidase, Golgi apparatus                 |
| 3107   | 7698       | MM5cg        | mannosyl-oligosaccharide 1,2-alpha-mannosidase, Golgi apparatus                 |
| 3108   | 7694       | MM6B1ag      | mannosyl-oligosaccharide 1,2-alpha-mannosidase, Golgi apparatus                 |
| 3109   | 7695       | MM6B1bg      | mannosyl-oligosaccharide 1,2-alpha-mannosidase, Golgi apparatus                 |
| 3110   | 7696       | MM6B2g       | mannosyl-oligosaccharide 1,2-alpha-mannosidase, Golgi apparatus                 |
| 3111   | 7702       | MM6ag        | mannosyl-oligosaccharide 1,2-alpha-mannosidase, Golgi apparatus                 |
| 3112   | 7703       | MM6bg        | mannosyl-oligosaccharide 1,2-alpha-mannosidase, Golgi apparatus                 |
| 3113   | 7701       | MM7Ag        | mannosyl-oligosaccharide 1,2-alpha-mannosidase, Golgi apparatus                 |
| 3114   | 7692       | MM7B1g       | mannosyl-oligosaccharide 1,2-alpha-mannosidase, Golgi apparatus                 |
| 3115   | 7693       | MM7B2g       | mannosyl-oligosaccharide 1,2-alpha-mannosidase, Golgi apparatus                 |
| 3116   | 7700       | MM7Cag       | mannosyl-oligosaccharide 1,2-alpha-mannosidase, Golgi apparatus                 |
| 3117   | 7699       | MM7Cbg       | mannosyl-oligosaccharide 1,2-alpha-mannosidase, Golgi apparatus                 |
| 3118   | 7689       | MM8Ag        | mannosyl-oligosaccharide 1,2-alpha-mannosidase, Golgi apparatus                 |
| 3119   | 7686       | MM8Ber       | mannosyl-oligosaccharide 1,2-alpha-mannosidase, endoplasmic reticulum           |
| 3120   | 7690       | MM8Cg        | mannosyl-oligosaccharide 1,2-alpha-mannosidase, Golgi apparatus                 |
| 3121   | 3201       | MMCD         | Methylmalonyl-CoA decarboxylase                                                 |
| 3122   | 14199      | MMCDm        | Methylmalonyl-CoA decarboxylase, mitochondrial                                  |
| 3123   | 14200      | MMCDp        | Methylmalonyl-CoA decarboxylase, peroxisomal                                    |
| 3124   | 8367       | MMEEm        | methylmalonyl-CoA epimerase/racemase                                            |
| 3125   | 12775      | MMMm         | methylmalonyl-CoA mutase                                                        |
| 3126   | 4509       | MMSAD1m      | methylmalonate-semialdehyde dehydrogenase                                       |
| 3127   | 10821      | MMSAD3m      | methylmalonate-semialdehyde dehydrogenase (malonic semialdehyde), mitochondrial |



| Column | Reaction # | Abbreviation | Reaction Name                                                       |
|--------|------------|--------------|---------------------------------------------------------------------|
| 3128   | 14096      | MMTSADm      | malonate-semialdehyde dehydrogenase (acetylating), mitochondrial    |
| 3129   | 14781      | MOGAT        | monoacylglycerol acyltransferase                                    |
| 3130   | 7109       | MTAP         | 5'-methylthioadenosine phosphorylase                                |
| 3131   | 7850       | MTHFC        | methenyltetrahydrofolate cyclohydrolase                             |
| 3132   | 7852       | MTHFCm       | methenyltetrahydrofolic acid cyclohydrolase, mitochondrial          |
| 3133   | 7853       | MTHFD        | methylenetetrahydrofolate dehydrogenase (NADP)                      |
| 3134   | 10526      | MTHFD2       | methylenetetrahydrofolate dehydrogenase (NAD)                       |
| 3135   | 10524      | MTHFD2m      | methylenetetrahydrofolate dehydrogenase (NAD), mitochondrial        |
| 3136   | 7855       | MTHFDm       | methylenetetrahydrofolate dehydrogenase (NADP), mitochondrial       |
| 3137   | 7858       | MTHFR3       | 5,10-methylenetetrahydrofolate reductase (NADPH)                    |
| 3138   | 14750      | MTHGXLt      | Methylglyoxal transport (cytosol to extracellular)                  |
| 3139   | 301        | MTRI         | 5-methylthioribose-1-phosphate isomerase                            |
| 3140   | 20461      | N2M2NMASt    | n2m2nmasn transport, Golgi to extracellular                         |
| 3141   | 20462      | N2M2NMAStly  | n2m2nmasn transport, extracellular to lysosome                      |
| 3142   | 8569       | N3Tg         | N-acetylgalactosamine 3-beta-galactosyltransferase, Golgi apparatus |
| 3143   | 8609       | N4Tg         | N-acetylgalactosamine 4-beta-galactosyltransferase, Golgi apparatus |
| 3144   | 1414       | NABTNO       | N4-Acetylaminobutanal:NAD+ oxidoreductase                           |
| 3145   | 10640      | NABTNOm      | N4-Acetylaminobutanal:NAD+ oxidoreductase (m)                       |
| 3146   | 9353       | NACASPAH     | N-Acetyl-L-aspartate amidohydrolase                                 |
| 3147   | 14516      | NACASPtM     | N-acetyl-L-aspartate transport (mitochondria to cytosol)            |
| 3148   | 20046      | NACHEX10ly   | beta-N-acetylhexosaminidase, lysosomal                              |
| 3149   | 20045      | NACHEX11ly   | beta-N-acetylhexosaminidase, lysosomal                              |
| 3150   | 20048      | NACHEX12ly   | beta-N-acetylhexosaminidase, lysosomal                              |
| 3151   | 20049      | NACHEX13ly   | beta-N-acetylhexosaminidase, lysosomal                              |
| 3152   | 20051      | NACHEX14ly   | beta-N-acetylhexosaminidase, lysosomal                              |
| 3153   | 20052      | NACHEX15ly   | beta-N-acetylhexosaminidase, lysosomal                              |
| 3154   | 20054      | NACHEX16ly   | beta-N-acetylhexosaminidase, lysosomal                              |
| 3155   | 20055      | NACHEX17ly   | beta-N-acetylhexosaminidase, lysosomal                              |
| 3156   | 20057      | NACHEX18ly   | beta-N-acetylhexosaminidase, lysosomal                              |
| 3157   | 20058      | NACHEX19ly   | beta-N-acetylhexosaminidase, lysosomal                              |
| 3158   | 14405      | NACHEX1ly    | beta-N-acetylhexosaminidase, lysosomal                              |
| 3159   | 20060      | NACHEX20ly   | beta-N-acetylhexosaminidase, lysosomal                              |
| 3160   | 20061      | NACHEX21ly   | beta-N-acetylhexosaminidase, lysosomal                              |
| 3161   | 20063      | NACHEX22ly   | beta-N-acetylhexosaminidase, lysosomal                              |
| 3162   | 20024      | NACHEX23ly   | beta-N-acetylhexosaminidase, lysosomal                              |
| 3163   | 20025      | NACHEX24ly   | beta-N-acetylhexosaminidase, lysosomal                              |
| 3164   | 20026      | NACHEX25ly   | beta-N-acetylhexosaminidase, lysosomal                              |
| 3165   | 20027      | NACHEX26ly   | beta-N-acetylhexosaminidase, lysosomal                              |
| 3166   | 14930      | NACHEX27ly   | beta-N-acetylhexosaminidase, lysosomal                              |
| 3167   | 14408      | NACHEX2ly    | beta-N-acetylhexosaminidase, lysosomal                              |
| 3168   | 14413      | NACHEX3ly    | beta-N-acetylhexosaminidase, lysosomal                              |
| 3169   | 14420      | NACHEX4ly    | beta-N-acetylhexosaminidase, lysosomal                              |
| 3170   | 14425      | NACHEX5ly    | beta-N-acetylhexosaminidase, lysosomal                              |
| 3171   | 14430      | NACHEX6ly    | beta-N-acetylhexosaminidase, lysosomal                              |
| 3172   | 14437      | NACHEX7ly    | beta-N-acetylhexosaminidase, lysosomal                              |
| 3173   | 14443      | NACHEX8ly    | beta-N-acetylhexosaminidase, lysosomal                              |
| 3174   | 14444      | NACHEX9ly    | beta-N-acetylhexosaminidase, lysosomal                              |
| 3175   | 14502      | NACHEXA10ly  | beta-N-acetylhexosaminidase A, lysosomal                            |
| 3176   | 14503      | NACHEXA11ly  | beta-N-acetylhexosaminidase A, lysosomal                            |
| 3177   | 14504      | NACHEXA12ly  | beta-N-acetylhexosaminidase A, lysosomal                            |
| 3178   | 14505      | NACHEXA13ly  | beta-N-acetylhexosaminidase A, lysosomal                            |

| Column | Reaction # | Abbreviation | Reaction Name                                         |
|--------|------------|--------------|-------------------------------------------------------|
| 3179   | 14506      | NACHEXA14ly  | beta-N-acetylhexosaminidase A, lysosomal              |
| 3180   | 14507      | NACHEXA15ly  | beta-N-acetylhexosaminidase A, lysosomal              |
| 3181   | 14508      | NACHEXA16ly  | beta-N-acetylhexosaminidase A, lysosomal              |
| 3182   | 14509      | NACHEXA17ly  | beta-N-acetylhexosaminidase A, lysosomal              |
| 3183   | 14510      | NACHEXA18ly  | beta-N-acetylhexosaminidase A, lysosomal              |
| 3184   | 14511      | NACHEXA19ly  | beta-N-acetylhexosaminidase A, lysosomal              |
| 3185   | 14410      | NACHEXA1ly   | beta-N-acetylhexosaminidase A, lysosomal              |
| 3186   | 14536      | NACHEXA20ly  | beta-N-acetylhexosaminidase A, lysosomal              |
| 3187   | 14537      | NACHEXA21ly  | beta-N-acetylhexosaminidase A, lysosomal              |
| 3188   | 14540      | NACHEXA22ly  | beta-N-acetylhexosaminidase A, lysosomal              |
| 3189   | 14414      | NACHEXA2ly   | beta-N-acetylhexosaminidase A, lysosomal              |
| 3190   | 14421      | NACHEXA3ly   | beta-N-acetylhexosaminidase A, lysosomal              |
| 3191   | 14426      | NACHEXA4ly   | beta-N-acetylhexosaminidase A, lysosomal              |
| 3192   | 14431      | NACHEXA5ly   | beta-N-acetylhexosaminidase A, lysosomal              |
| 3193   | 14432      | NACHEXA6ly   | beta-N-acetylhexosaminidase A, lysosomal              |
| 3194   | 14446      | NACHEXA7ly   | beta-N-acetylhexosaminidase A, lysosomal              |
| 3195   | 14447      | NACHEXA8ly   | beta-N-acetylhexosaminidase A, lysosomal              |
| 3196   | 14501      | NACHEXA9ly   | beta-N-acetylhexosaminidase A, lysosomal              |
| 3197   | 1796       | NACUP        | Nicotinic acid uptake                                 |
| 3198   | 4313       | NADH2-u10m   | NADH dehydrogenase, mitochondrial                     |
| 3199   | 15145      | NADHtpu      | NADH transporter, peroxisome                          |
| 3200   | 13977      | NADHtru      | NADH transporter, endoplasmic reticulum               |
| 3201   | 33         | NADK         | NAD kinase                                            |
| 3202   | 171        | NADN         | NAD nucleosidase                                      |
| 3203   | 10515      | NADNe        | NAD nucleosidase,extracellular                        |
| 3204   | 13979      | NADPHtru     | NADPH transporter, endoplasmic reticulum              |
| 3205   | 13998      | NADPHtxu     | NADPH transporter, peroxisome                         |
| 3206   | 2811       | NADPN        | NADP nucleosidase                                     |
| 3207   | 10514      | NADPNe       | NADP nucleosidase,extracellular                       |
| 3208   | 13980      | NADPtru      | NADP transporter, endoplasmic reticulum               |
| 3209   | 13999      | NADPtxu      | NADP transporter, peroxisome                          |
| 3210   | 37         | NADS2        | NAD synthase (glutamine-hydrolysing)                  |
| 3211   | 19526      | NADtn        | NAD transport, nuclear through pores                  |
| 3212   | 15146      | NADtpu       | NAD transporter, peroxisome                           |
| 3213   | 13974      | NADtru       | NAD transporter, endoplasmic reticulum                |
| 3214   | 14541      | NAGA2ly      | N-acetylgalactosaminidase, alpha-                     |
| 3215   | 20859      | NAGAlby      | N-acetylgalactosaminidase, beta-                      |
| 3216   | 11074      | NAGAlly      | N-acetylgalactosaminidase, alpha-                     |
| 3217   | 14542      | NAGLCAly     | N-acetylglucosaminidase, lysosomal                    |
| 3218   | 12050      | NAHCO3_HCLt  | bicarbonate transport (HCl/NaHCO3 exchange)           |
| 3219   | 12115      | NAIt         | Na+ / iodide cotransport                              |
| 3220   | 11965      | NAt          | sodium transport (uniport)                            |
| 3221   | 1085       | NAt3_1       | sodium proton antiporter (H:NA is 1:1)                |
| 3222   | 12672      | NAt3_1g      | sodium proton antiporter (H:NA is 1:1)                |
| 3223   | 12617      | NAt5         | sodium/ammonium proton antiporter                     |
| 3224   | 19419      | NAtx         | sodium transport via diffusion (perioxisome)          |
| 3225   | 9763       | NBAHH_ir     | Nalpha-(beta-alanyl)-L-histidine hydrolase IR         |
| 3226   | 8202       | NCAMUP       | Nicotinamide acid uptake                              |
| 3227   | 13050      | NCCt         | Na+-Cl- cotransport                                   |
| 3228   | 12695      | NCKt         | Na+/Ca2+-K+ exchange                                  |
| 3229   | 12696      | NCNt         | Na+/Ca2+-NH4+ exchange                                |
| 3230   | 11147      | NDP10ex      | nucleoside-diphosphatase (IDP), extracellular         |
| 3231   | 11143      | NDP3ex       | nucleoside-diphosphatase (GDP), extracellular         |
| 3232   | 801        | NDP6         | nucleoside-diphosphatase (dCDP)                       |
| 3233   | 15237      | NDP7er       | nucleoside-diphosphatase (UDP), endoplasmic reticulum |
| 3234   | 11144      | NDP7ex       | nucleoside-diphosphatase (UDP), extracellular         |

| Column | Reaction # | Abbreviation | Reaction Name                                            |
|--------|------------|--------------|----------------------------------------------------------|
| 3235   | 13534      | NDP7g        | nucleoside-diphosphatase (UDP), Golgi apparatus          |
| 3236   | 803        | NDP8         | nucleoside-diphosphatase (dUDP)                          |
| 3237   | 11149      | NDP8ex       | nucleoside-diphosphatase (UTP), extracellular            |
| 3238   | 2816       | NDPK1        | nucleoside-diphosphate kinase (ATP:GDP)                  |
| 3239   | 9819       | NDPK10       | nucleoside-diphosphate kinase (ATP:dIDP)                 |
| 3240   | 9827       | NDPK10m      | nucleoside-diphosphate kinase (ATP:dIDP), mitochondrial  |
| 3241   | 9826       | NDPK10n      | nucleoside-diphosphate kinase (ATP:dIDP), nuclear        |
| 3242   | 9825       | NDPK1m       | nucleoside-diphosphate kinase (ATP:GDP), mitochondrial   |
| 3243   | 9820       | NDPK1n       | nucleoside-diphosphate kinase (ATP:GDP), nuclear         |
| 3244   | 190        | NDPK2        | nucleoside-diphosphate kinase (ATP:UDP)                  |
| 3245   | 9824       | NDPK2m       | nucleoside-diphosphate kinase (ATP:UDP), mitochondrial   |
| 3246   | 9821       | NDPK2n       | nucleoside-diphosphate kinase (ATP:UDP), nuclear         |
| 3247   | 191        | NDPK3        | nucleoside-diphosphate kinase (ATP:CDP)                  |
| 3248   | 9828       | NDPK3m       | nucleoside-diphosphate kinase (ATP:CDP), mitochondrial   |
| 3249   | 9822       | NDPK3n       | nucleoside-diphosphate kinase (ATP:CDP), nuclear         |
| 3250   | 192        | NDPK4        | nucleoside-diphosphate kinase (ATP:dTDP)                 |
| 3251   | 9830       | NDPK4m       | nucleoside-diphosphate kinase (ATP:dTDP), mitochondrial  |
| 3252   | 9829       | NDPK4n       | nucleoside-diphosphate kinase (ATP:dTDP), nuclear        |
| 3253   | 443        | NDPK5        | nucleoside-diphosphate kinase (ATP:dGDP)                 |
| 3254   | 9832       | NDPK5m       | nucleoside-diphosphate kinase (ATP:dGDP), mitochondrial  |
| 3255   | 9831       | NDPK5n       | nucleoside-diphosphate kinase (ATP:dGDP), nuclear        |
| 3256   | 132        | NDPK6        | nucleoside-diphosphate kinase (ATP:dUDP)                 |
| 3257   | 9834       | NDPK6m       | nucleoside-diphosphate kinase (ATP:dUDP), mitochondrial  |
| 3258   | 9833       | NDPK6n       | nucleoside-diphosphate kinase (ATP:dUDP), nuclear        |
| 3259   | 2801       | NDPK7        | nucleoside-diphosphate kinase (ATP:dCDP)                 |
| 3260   | 9836       | NDPK7m       | nucleoside-diphosphate kinase (ATP:dCDP), mitochondrial  |
| 3261   | 9835       | NDPK7n       | nucleoside-diphosphate kinase (ATP:dCDP), nuclear        |
| 3262   | 133        | NDPK8        | nucleoside-diphosphate kinase (ATP:dADP)                 |
| 3263   | 9838       | NDPK8m       | nucleoside-diphosphate kinase (ATP:dADP), mitochondrial  |
| 3264   | 9837       | NDPK8n       | nucleoside-diphosphate kinase (ATP:dADP), nuclear        |
| 3265   | 1438       | NDPK9        | nucleoside-diphosphate kinase (ATP:IDP)                  |
| 3266   | 9840       | NDPK9m       | nucleoside-diphosphate kinase (ATP:IDP), mitochondrial   |
| 3267   | 9839       | NDPK9n       | nucleoside-diphosphate kinase (ATP:IDP), nuclear         |
| 3268   | 12611      | NH4t3r       | ammonia transport via proton antiport                    |
| 3269   | 19374      | NH4tn        | ammonia nuclear transport                                |
| 3270   | 2280       | NH4tp        | ammonia peroxisomal transport                            |
| 3271   | 13187      | NICRNS       | NICRNS                                                   |
| 3272   | 19529      | NICRNTtn     | NICRNT transport, nuclear through pore                   |
| 3273   | 19704      | NIFEDIPINEte | xenobiotic transport                                     |
| 3274   | 13053      | NKCC2t       | Na+-K+-Cl- cotransport (NH4+)                            |
| 3275   | 12745      | NKCCt        | Na+-K+-Cl- cotransport                                   |
| 3276   | 1811       | NMNATm       | nicotinamide-nucleotide adenyltransferase, mitochondrial |
| 3277   | 9544       | NMNATn       | nicotinamide-nucleotide adenyltransferase                |
| 3278   | 10516      | NMNATr       | nicotinamide-nucleotide adenyltransferase                |
| 3279   | 143        | NMNS         | NMN synthetase                                           |
| 3280   | 19527      | NMNtn        | NMN transport, nuclear through pore                      |
| 3281   | 11089      | NMPTRCOX     | N-Methylputrescine:oxygen oxidoreductase (deaminating)   |
| 3282   | 173        | NNAT         | nicotinate-nucleotide adenyltransferase                  |
| 3283   | 1810       | NNATm        | nicotinate-nucleotide adenyltransferase, mitochondrial   |
| 3284   | 9543       | NNATn        | nicotinate-nucleotide adenyltransferase                  |
| 3285   | 6171       | NNATr        | nicotinate-nucleotide adenyltransferase                  |
| 3286   | 2769       | NNDPR        | nicotinate-nucleotide diphosphorylase (carboxylating)    |
| 3287   | 10512      | NNMT         | Nicotinamide N-methyltransferase                         |
| 3288   | 12097      | NORANMT      | noradrenaline N-methyltransferase                        |

| Column | Reaction # | Abbreviation | Reaction Name                                                   |
|--------|------------|--------------|-----------------------------------------------------------------|
| 3289   | 10159      | NOS1         | Nitric Oxide Synthase (intermediate forming)                    |
| 3290   | 10166      | NOS2         | Nitric Oxide Synthase (NO forming)                              |
| 3291   | 6008       | NOt          | NO transport (diffusion)                                        |
| 3292   | 13200      | NP1          | nucleotide phosphatase                                          |
| 3293   | 19705      | NPTHLte      | xenobiotic transport                                            |
| 3294   | 19421      | NRPPHRSFt    | norepinephrine sulfate transport (diffusion)                    |
| 3295   | 12106      | NRPPHRSULT   | Norepinephrine Sulfotransferase                                 |
| 3296   | 11933      | NRPPHRVESSEC | Noradrenaline secretion via secretory vesicle (ATP driven)      |
| 3297   | 11937      | NRPPHRt4(2)r | Norepinephrine reversible transport in via sodium symport (1:2) |
| 3298   | 12196      | NRPPHRtu     | Norepinephrine uniport                                          |
| 3299   | 19035      | NRVNCCOAtx   | fatty acid intracellular transport                              |
| 3300   | 19095      | NRVNCCPT1    | carnitine O-palmitoyltransferase                                |
| 3301   | 19114      | NRVNCCPT2    | carnitine transferase                                           |
| 3302   | 19076      | NRVNCCRNt    | transport into the mitochondria (carnitine)                     |
| 3303   | 12458      | NRVNCt       | fatty acid transport via diffusion                              |
| 3304   | 8574       | NS26T2g      | alpha-N-acetylgalactosaminide alpha-2,6-sialyltransferase       |
| 3305   | 8567       | NS26Tg       | alpha-N-acetylgalactosaminide alpha-2,6-sialyltransferase       |
| 3306   | 13188      | NT5C         | 5'-nucleotidase                                                 |
| 3307   | 2697       | NTD1         | 5'-nucleotidase (dUMP)                                          |
| 3308   | 175        | NTD10        | 5'-nucleotidase (XMP)                                           |
| 3309   | 176        | NTD11        | 5'-nucleotidase (IMP)                                           |
| 3310   | 10419      | NTD12        | 5'-nucleotidase (dIMP)                                          |
| 3311   | 10414      | NTD1m        | 5'-nucleotidase (dUMP),mitochondrial                            |
| 3312   | 448        | NTD2         | 5'-nucleotidase (UMP)                                           |
| 3313   | 10430      | NTD2e        | 5'-nucleotidase (UMP), extracellular                            |
| 3314   | 12650      | NTD2l        | 5'-nucleotidase (UMP), lysosome                                 |
| 3315   | 10416      | NTD2m        | 5'-nucleotidase (UMP), mitochondrial                            |
| 3316   | 449        | NTD3         | 5'-nucleotidase (dCMP)                                          |
| 3317   | 12654      | NTD3l        | 5'-nucleotidase (dCMP), lysosomal                               |
| 3318   | 450        | NTD4         | 5'-nucleotidase (CMP)                                           |
| 3319   | 10431      | NTD4e        | 5'-nucleotidase (CMP), extracellular                            |
| 3320   | 12649      | NTD4l        | 5'-nucleotidase (CMP), lysosome                                 |
| 3321   | 451        | NTD5         | 5'-nucleotidase (dTMP)                                          |
| 3322   | 12653      | NTD5l        | 5'-nucleotidase (dTMP), lysosomal                               |
| 3323   | 10415      | NTD5m        | 5'-nucleotidase (dTMP), mitochondrial                           |
| 3324   | 452        | NTD6         | 5'-nucleotidase (dAMP)                                          |
| 3325   | 12651      | NTD6l        | 5'-nucleotidase (dAMP), lysosome                                |
| 3326   | 2698       | NTD7         | 5'-nucleotidase (AMP)                                           |
| 3327   | 10433      | NTD7e        | 5'-nucleotidase (AMP), extracellular                            |
| 3328   | 12646      | NTD7l        | 5'-nucleotidase (AMP), lysosome                                 |
| 3329   | 453        | NTD8         | 5'-nucleotidase (dGMP)                                          |
| 3330   | 12652      | NTD8l        | 5'-nucleotidase (dGMP), lysosomal                               |
| 3331   | 174        | NTD9         | 5'-nucleotidase (GMP)                                           |
| 3332   | 10432      | NTD9e        | 5'-nucleotidase (GMP), extracellular                            |
| 3333   | 12648      | NTD9l        | 5'-nucleotidase (GMP), lysosome                                 |
| 3334   | 14816      | NTMELYStner  | protein trimethyl lysine transport (nucleus to ER)              |
| 3335   | 6225       | NTP3e        | nucleoside-triphosphatase (GTP)                                 |
| 3336   | 9745       | NTPP10       | Nucleoside triphosphate pyrophosphorylase (ditp)                |
| 3337   | 9747       | NTPP11       | Nucleoside triphosphate pyrophosphorylase (xtp)                 |
| 3338   | 9738       | NTPP9        | Nucleoside triphosphate pyrophosphorylase (itp)                 |
| 3339   | 13752      | NaKt         | Na+/K+ exchanging ATPase                                        |
| 3340   | 10086      | O16G1e       | oligo-1,6-glucosidase (glygn4 -> glygn5), extracellular         |
| 3341   | 10090      | O16G2e       | oligo-1,6-glucosidase (strch2 ->strch3), extracellular          |
| 3342   | 20850      | O2St         | superoxide anion transport via diffusion (extracellular)        |
| 3343   | 20851      | O2Stm        | superoxide anion transport via diffusion (mitochondria)         |

| Column | Reaction # | Abbreviation | Reaction Name                                                                       |
|--------|------------|--------------|-------------------------------------------------------------------------------------|
| 3344   | 20849      | O2Stn        | superoxide anion transport via diffusion (nucleus)                                  |
| 3345   | 20848      | O2Stx        | superoxide anion transport via diffusion (peroxisome)                               |
| 3346   | 1298       | O2t          | o2 transport (diffusion)                                                            |
| 3347   | 2158       | O2ter        | O2 transport, endoplasmic reticulum                                                 |
| 3348   | 762        | O2tm         | O2 transport (diffusion)                                                            |
| 3349   | 15238      | O2tn         | O2 nuclear transport                                                                |
| 3350   | 13516      | O2tp         | O2 transport, peroxisomal                                                           |
| 3351   | 20237      | OAGD3te      | oagd3_hs transport                                                                  |
| 3352   | 20221      | OAGD3tg      | oagd3_hs intracellular transport                                                    |
| 3353   | 20238      | OAGT3te      | oagt3_hs transport                                                                  |
| 3354   | 20222      | OAGT3tg      | oagt3_hs intracellular transport                                                    |
| 3355   | 10993      | OBdHc        | 2-Oxobutanoate dehydrogenase, cytosolic                                             |
| 3356   | 3992       | OCBTm        | ornithine carbamoyltransferase, irreversible                                        |
| 3357   | 8359       | OCCOAtm      | Octanoyl-CoA transport, diffusion                                                   |
| 3358   | 19037      | OCCOAtx      | fatty acid intracellular transport                                                  |
| 3359   | 12448      | OCDCAttr     | fatty acid transport via diffusion                                                  |
| 3360   | 12447      | OCDCAttr     | fatty acid transport via diffusion                                                  |
| 3361   | 3986       | OCOAT1m      | 3-oxoacid CoA-transferase                                                           |
| 3362   | 8146       | OCTAt        | Octanoate transport via diffusion                                                   |
| 3363   | 19038      | ODECOAtx     | fatty acid intracellular transport                                                  |
| 3364   | 10904      | OIVD1m       | 2-oxoisovalerate dehydrogenase (acylating; 4-methyl-2-oxopentanoate), mitochondrial |
| 3365   | 10905      | OIVD2m       | 2-oxoisovalerate dehydrogenase (acylating; 3-methyl-2-oxobutanoate), mitochondrial  |
| 3366   | 10906      | OIVD3m       | 2-oxoisovalerate dehydrogenase (acylating; 3-methyl-2-oxopentanoate), mitochondrial |
| 3367   | 19706      | OMEPRAZOLEte | xenobiotic transport                                                                |
| 3368   | 446        | OMPDC        | orotidine-5'-phosphate decarboxylase                                                |
| 3369   | 19719      | ONPHTLte     | xenobiotic transport                                                                |
| 3370   | 10877      | OPAHir       | 5-Oxoproline amidohydrolase (ATP-hydrolysing) (ir)                                  |
| 3371   | 15089      | ORETNF       | 4-oxo-retinoic acid formation (oxidation)                                           |
| 3372   | 15117      | ORETNF2      | 13-cis-4-oxo-retinoic acid formation (oxidation)                                    |
| 3373   | 15090      | ORETNtm      | 4-oxo-retinoic acid transport, Nuclear                                              |
| 3374   | 15121      | ORETNtm2     | 13-cis-4-oxo-retinoic acid transport, Nuclear                                       |
| 3375   | 1218       | ORNDC        | Ornithine Decarboxylase                                                             |
| 3376   | 9721       | ORNtArm      | ornithine transaminase reversible (m)                                               |
| 3377   | 2435       | ORNt3m       | ornithine mitochondrial transport via proton antiport                               |
| 3378   | 5287       | ORNt4m       | ornithine mitochondrial transport exchange with citruline                           |
| 3379   | 11704      | ORNtiDF      | ornithine transport via diffusion (extracellular to cytosol)                        |
| 3380   | 447        | ORPT         | orotate phosphoribosyltransferase                                                   |
| 3381   | 12362      | OXAHCotex    | oxalate transport via bicarbonate countertransport                                  |
| 3382   | 19516      | OXAtp        | oxalate transport out of peroxisome                                                 |
| 3383   | 19772      | P45011A1m    | Cytochrome P450 11A1, mitochondrial [Precursor]                                     |
| 3384   | 9909       | P45011B11m   | Steroid 11-beta-hydroxylase                                                         |
| 3385   | 9910       | P45011B12m   | Steroid 11-beta-hydroxylase                                                         |
| 3386   | 9949       | P45011B21m   | Steroid 11-beta-hydroxylase                                                         |
| 3387   | 9870       | P45017A1r    | Cytochrome P450 17A1                                                                |
| 3388   | 9869       | P45017A2r    | Cytochrome P450 17A1                                                                |
| 3389   | 9937       | P45017A3r    | Cytochrome P450 17A1                                                                |
| 3390   | 9941       | P45017A4r    | Cytochrome P450 17A1                                                                |
| 3391   | 9963       | P45019A1r    | aromatase                                                                           |
| 3392   | 9964       | P45019A2r    | aromatase                                                                           |
| 3393   | 11670      | P4501B1r     | cytochrome P450 1B1                                                                 |
| 3394   | 9916       | P45021A1r    | Steroid 21-hydroxylase                                                              |
| 3395   | 9914       | P45021A2r    | Steroid 21-hydroxylase                                                              |

| Column | Reaction # | Abbreviation | Reaction Name                                                       |
|--------|------------|--------------|---------------------------------------------------------------------|
| 3396   | 9660       | P45027A11m   | 5-beta-cholestane-3-alpha,7-alpha,12-alpha-triol 27-hydroxylase     |
| 3397   | 9665       | P45027A12m   | 5-beta-cholestane-3-alpha,7-alpha,12-alpha-triol 27-hydroxylase     |
| 3398   | 13902      | P45027A13m   | 5-beta-cholestane-3-alpha,7-alpha,12-alpha-triol 27-hydroxylase     |
| 3399   | 13891      | P45027A14m   | 5-beta-cytochrome P450, family 27, subfamily A, polypeptide 1       |
| 3400   | 13907      | P45027A15m   | 5-beta-cytochrome P450, family 27, subfamily A, polypeptide 1       |
| 3401   | 13909      | P45027A16m   | Cytochrome P450 27                                                  |
| 3402   | 9567       | P45027A1m    | Cytochrome P450 27                                                  |
| 3403   | 11669      | P4502A6      | cytochrome P450 2A6                                                 |
| 3404   | 11666      | P4502C18     | cytochrome P450 2C18                                                |
| 3405   | 11663      | P4502C19     | cytochrome P450 2C19                                                |
| 3406   | 11668      | P4502C8      | cytochrome P450 2C8                                                 |
| 3407   | 11667      | P4502C9      | cytochrome P450 2C9                                                 |
| 3408   | 11901      | P4502C92     | cytochrome P450 2C9                                                 |
| 3409   | 11902      | P4502C93     | cytochrome P450 2C9                                                 |
| 3410   | 11903      | P4502C94     | cytochrome P450 2C9                                                 |
| 3411   | 11662      | P4502D6      | cytochrome P450 2D6                                                 |
| 3412   | 11661      | P4502E1      | cytochrome P450 2E1                                                 |
| 3413   | 11660      | P4502F1      | cytochrome P450 2F1                                                 |
| 3414   | 9569       | P45039A1r    | oxysterol 7-alpha-hydroxylase                                       |
| 3415   | 11659      | P4503A4      | cytochrome P450 3A4                                                 |
| 3416   | 11656      | P4503A43r    | cytochrome p450 P450 3A43                                           |
| 3417   | 11657      | P4503A5      | cytochrome P450 3A5                                                 |
| 3418   | 11655      | P4503A7r     | cytochrome p450 P450 3A7                                            |
| 3419   | 9563       | P45046A1r    | cytochrome P450, family 46, subfamily A, polypeptide 1              |
| 3420   | 11609      | P4504B1r     | cytochrome P450 4B1                                                 |
| 3421   | 11588      | P4504F121r   | cytochrome p450 4F12/4F2                                            |
| 3422   | 11589      | P4504F122r   | cytochrome p450 4F12/4F2                                            |
| 3423   | 11590      | P4504F123r   | cytochrome p450 4F12/4F2                                            |
| 3424   | 11591      | P4504F81r    | cytochrome p450 4F8                                                 |
| 3425   | 9562       | P4507A1r     | cytochrome P450, family 7, subfamily A, polypeptide 1               |
| 3426   | 9570       | P4507B11r    | oxysterol 7alpha-hydroxylase                                        |
| 3427   | 9571       | P4507B12r    | oxysterol 7alpha-hydroxylase                                        |
| 3428   | 9710       | P4508B11r    | sterol 12-alpha-hydroxylase                                         |
| 3429   | 9712       | P4508B13r    | sterol 12-alpha-hydroxylase (nadh)                                  |
| 3430   | 19866      | P450LTB4r    | cytochrome p450 leukotriene B4                                      |
| 3431   | 1470       | P450SCC1m    | cholesterol monooxygenase                                           |
| 3432   | 3319       | P5CDm        | l-pyrroline-5-carboxylate dehydrogenase, mitochondrial              |
| 3433   | 3629       | P5CR         | pyrroline-5-carboxylate reductase                                   |
| 3434   | 11289      | P5CRm        | pyrroline-5-carboxylate reductase (m)                               |
| 3435   | 7185       | P5CRx        | pyrroline-5-carboxylate reductase                                   |
| 3436   | 11290      | P5CRxm       | pyrroline-5-carboxylate reductase (m)                               |
| 3437   | 3239       | PACCOAL      | phenylacetate-CoA ligase                                            |
| 3438   | 12075      | PAFH         | Platelet-activating factor acetylhydrolase                          |
| 3439   | 14980      | PAFHe        | Platelet-activating factor acetylhydrolase                          |
| 3440   | 10807      | PAFS         | alkyl glycerol phosphocholine acetyl transferase                    |
| 3441   | 19571      | PAIL45P_HStn | phosphatidylinositol 4,5-bisphosphate nuclear transport (diffusion) |
| 3442   | 19574      | PAIL4P_HStn  | phosphatidylinositol 4-phosphate nuclear transport (diffusion)      |
| 3443   | 19591      | PAIL_HStn    | phosphatidylinositol nuclear transport (diffusion)                  |
| 3444   | 14681      | PAN4PP       | phosphatase (pan4p)                                                 |

| Column | Reaction # | Abbreviation  | Reaction Name                                                |
|--------|------------|---------------|--------------------------------------------------------------|
| 3445   | 12155      | PAPStg        | 3'-Phosphoadenylyl sulfate Golgi transport                   |
| 3446   | 15236      | PAPtg         | adenosine 3',5'-bisphosphate Golgi transport                 |
| 3447   | 14999      | PA_HSter      | phosphatidate scramblase                                     |
| 3448   | 15000      | PA_HSStg      | phosphatidate scramblase                                     |
| 3449   | 19525      | PA_HStn       | phosphatidate transport, nuclear                             |
| 3450   | 15010      | PCFLOPm       | phosphatidylcholine flippase                                 |
| 3451   | 11889      | PCHOLP_hs     | choline phosphatase                                          |
| 3452   | 11888      | PCHOLPg_hs    | choline phosphatase                                          |
| 3453   | 11886      | PCHOLPm_hs    | choline phosphatase                                          |
| 3454   | 11887      | PCHOLPr_hs    | choline phosphatase                                          |
| 3455   | 14997      | PCHOL_HSter   | phosphatidylcholine scramblase                               |
| 3456   | 14998      | PCHOL_HSStg   | phosphatidylcholine scramblase                               |
| 3457   | 2973       | PCLAD         | picolinic acid decarboxylase                                 |
| 3458   | 11406      | PCLYSOX       | Procollagen-lysine 1, 2-oxoglutarate 5-dioxygenase           |
| 3459   | 14383      | PCREATmdiffir | Phosphocreatine transport to/from mitochondria via diffusion |
| 3460   | 19738      | PCRNtc        | transport into the cytosol from peroxisome (carnitine)       |
| 3461   | 19739      | PCRNtm        | transport into the mitochondria from cytosol (carnitine)     |
| 3462   | 5206       | PCm           | pyruvate carboxylase                                         |
| 3463   | 12666      | PCt           | phosphatidylcholine transporter                              |
| 3464   | 2655       | PDE1          | 3',5'-cyclic-nucleotide phosphodiesterase                    |
| 3465   | 9958       | PDE1g         | 3',5'-cyclic-nucleotide phosphodiesterase, Golgi             |
| 3466   | 4690       | PDE4          | 3',5'-cyclic-nucleotide phosphodiesterase                    |
| 3467   | 9959       | PDE4g         | 3',5'-cyclic-nucleotide phosphodiesterase, Golgi             |
| 3468   | 11276      | PDE4n         | 3',5'-cyclic-nucleotide phosphodiesterase, Nucleus           |
| 3469   | 11         | PDHm          | pyruvate dehydrogenase                                       |
| 3470   | 1729       | PDX5PO        | pyridoxine 5'-phosphate oxidase                              |
| 3471   | 1821       | PDXPP         | Pyridoxine 5-phosphate phosphatase                           |
| 3472   | 2521       | PEAMNO        | Phenethylamine oxidase                                       |
| 3473   | 11288      | PECGONCOATr   | Pseudoecgonine CoA transferase (ER)                          |
| 3474   | 15005      | PEFLIP        | phosphatidylethanolamine flippase                            |
| 3475   | 15007      | PEFLIPm       | phosphatidylethanolamine flippase                            |
| 3476   | 3084       | PEPCK         | Phosphoenolpyruvate carboxykinase (GTP)                      |
| 3477   | 4418       | PEPCKm        | Phosphoenolpyruvate carboxykinase (GTP)                      |
| 3478   | 14775      | PEPLYStn      | peptide (lysine) nuclear transport via diffusion             |
| 3479   | 20195      | PERILLYLte    | xenobiotic transport                                         |
| 3480   | 18982      | PEROXx        | peroxisomal lumped long chain fatty acid oxidation           |
| 3481   | 2385       | PETHCT        | phosphoethanolamine cytidyltransferase                       |
| 3482   | 19599      | PETOHMm_hs    | phosphatidylethanolamine N-methyltransferase                 |
| 3483   | 19600      | PETOHMr_hs    | phosphatidylethanolamine N-methyltransferase                 |
| 3484   | 14995      | PE_HSter      | phosphatidylethanolamine scramblase                          |
| 3485   | 14996      | PE_HSStg      | phosphatidylethanolamine scramblase                          |
| 3486   | 20872      | PE_HStm       | phosphatidylethanolamine scramblase                          |
| 3487   | 267        | PFK           | phosphofructokinase                                          |
| 3488   | 698        | PFK26         | 6-phosphofructo-2-kinase                                     |
| 3489   | 2865       | PGCD          | phosphoglycerate dehydrogenase                               |
| 3490   | 9973       | PGDI          | Prostaglandin-H2 D-isomerase [Precursor]                     |
| 3491   | 9972       | PGDIr         | Prostaglandin-H2 D-isomerase [Precursor]                     |
| 3492   | 9991       | PGESr         | Prostaglandin E synthase                                     |
| 3493   | 271        | PGI           | glucose-6-phosphate isomerase                                |
| 3494   | 9997       | PGISr         | Prostaglandin I2 synthase                                    |
| 3495   | 273        | PGK           | phosphoglycerate kinase                                      |
| 3496   | 278        | PGL           | 6-phosphogluconolactonase                                    |
| 3497   | 2286       | PGLYCP        | Phosphoglycolate phosphatase                                 |
| 3498   | 9555       | PGLer         | 6-phosphogluconolactonase, endoplasmic reticulum             |
| 3499   | 272        | PGM           | phosphoglycerate mutase                                      |

| Column | Reaction # | Abbreviation | Reaction Name                                                                                                    |
|--------|------------|--------------|------------------------------------------------------------------------------------------------------------------|
| 3500   | 2819       | PGMT         | phosphoglucomutase                                                                                               |
| 3501   | 10862      | PGPPT        | phosphatidyl-CMP: glycerophosphate phosphatidyltransferase                                                       |
| 3502   | 10863      | PGPP_hs      | Phosphatidylglycerol phosphate phosphatase (homo sapiens)                                                        |
| 3503   | 15226      | PGS          | Prostaglandin G/H synthase                                                                                       |
| 3504   | 15227      | PGSr         | Prostaglandin G/H synthase                                                                                       |
| 3505   | 11634      | PHACCOAGLNAC | Phenylacetyl-CoA:L-glutamine alpha-N-phenylacetyltransferase                                                     |
| 3506   | 3492       | PHCDm        | L-1-pyrroline-3-hydroxy-5-carboxylate dehydrogenase                                                              |
| 3507   | 3565       | PHCHGSm      | L-1-Pyrroline-3-hydroxy-5-carboxylate spontaneous conversion to L-4-Hydroxyglutamate semialdehyde, mitochondrial |
| 3508   | 14513      | PHEACGLNt    | PHEACGLN extracellular transport via diffusion                                                                   |
| 3509   | 14687      | PHEMEt       | heme transport                                                                                                   |
| 3510   | 8500       | PHEMEtm      | Heme transport to cytosol                                                                                        |
| 3511   | 2860       | PHETA1       | phenylalanine transaminase                                                                                       |
| 3512   | 9484       | PHETA1m      | phenylalanine transaminase (m)                                                                                   |
| 3513   | 14585      | PHEHTPTOX2   | L-Phenylalanine,tetrahydrobiopterin:oxygen oxidoreductase (4-hydroxylating)                                      |
| 3514   | 11694      | PHEt4        | L-phenylalanine transport in via sodium symport                                                                  |
| 3515   | 11928      | PHEtec       | L-phenylalanine transport via diffusion (extracellular to cytosol)                                               |
| 3516   | 9490       | PHYCBOXL     | L-Phenylalanine carboxy-lyase                                                                                    |
| 3517   | 14100      | PHYHx        | Phytanoyl-CoA dioxygenase, peroxisomal                                                                           |
| 3518   | 10501      | PHYQt        | Phylloquinone transport                                                                                          |
| 3519   | 19806      | PHYTt        | fatty acid transport via diffusion                                                                               |
| 3520   | 10889      | PI345P3P     | phosphatidylinositol-3,4,5-trisphosphate 3-phosphatase                                                           |
| 3521   | 19612      | PI345P3Pn    | phosphatidylinositol-3,4,5-trisphosphate 3-phosphatase, nuclear                                                  |
| 3522   | 11040      | PI345P5P     | phosphatidylinositol-3,4,5-trisphosphate 5-phosphatase                                                           |
| 3523   | 19611      | PI345P5Pn    | phosphatidylinositol-3,4,5-trisphosphate 5-phosphatase, nuclear                                                  |
| 3524   | 19617      | PI34P3Pn     | phosphatidylinositol-3,4-bisphosphate 3-phosphatase, nuclear                                                     |
| 3525   | 19609      | PI34P4Pn     | phosphatidylinositol-3,4-bisphosphate 4-phosphatase, nuclear                                                     |
| 3526   | 11039      | PI34P5K      | phosphatidylinositol 3,4-bisphosphate 5-kinase                                                                   |
| 3527   | 19610      | PI34P5Kn     | phosphatidylinositol 3,4-bisphosphate 5-kinase, nuclear                                                          |
| 3528   | 19602      | PI35P3P      | phosphatidylinositol-3,5-bisphosphate 3-phosphatase                                                              |
| 3529   | 19607      | PI3P3Pn      | phosphatidylinositol-3-phosphate 3-phosphatase, nuclear                                                          |
| 3530   | 11037      | PI3P4K       | phosphatidylinositol 3-phosphate 4-kinase                                                                        |
| 3531   | 19608      | PI3P4Kn      | phosphatidylinositol 3-phosphate 4-kinase, nuclear                                                               |
| 3532   | 11043      | PI3P5K       | phosphatidylinositol 3-phosphate 5-kinase                                                                        |
| 3533   | 19603      | PI3PP        | phosphatidylinositol-3-phosphate 3-phosphatase                                                                   |
| 3534   | 10879      | PI45P3K      | phosphatidylinositol 4,5-bisphosphate 3-kinase                                                                   |
| 3535   | 19613      | PI45P3Kn     | phosphatidylinositol 4,5-bisphosphate 3-kinase, nuclear                                                          |
| 3536   | 11047      | PI45P4P      | phosphatidylinositol-4,5-bisphosphate 4-phosphatase                                                              |
| 3537   | 10868      | PI45P5P      | phosphatidylinositol-4,5-bisphosphate 5-phosphatase                                                              |
| 3538   | 19614      | PI45P5Pn     | phosphatidylinositol-4,5-bisphosphate 5-phosphatase, nuclear                                                     |
| 3539   | 10995      | PI45PLC      | phosphatidylinositol 4,5-bisphosphate phospholipase C                                                            |
| 3540   | 11023      | PI45PLCn     | phosphatidylinositol 4,5-bisphosphate phospholipase C, nucleus                                                   |
| 3541   | 10988      | PI4P3K       | phosphatidylinositol 4-phosphate 3-kinase                                                                        |



| Column | Reaction # | Abbreviation | Reaction Name                                                               |
|--------|------------|--------------|-----------------------------------------------------------------------------|
| 3542   | 10989      | PI4P3Ker     | phosphatidylinositol 4-phosphate 3-kinase, endoplasmic reticulum            |
| 3543   | 19616      | PI4P3Kn      | phosphatidylinositol 4-phosphate 3-kinase, nuclear                          |
| 3544   | 19619      | PI4P4Pn      | phosphatidylinositol-4-phosphate 4-phosphatase, nuclear                     |
| 3545   | 10764      | PI4P5K       | phosphatidylinositol 4-phosphate 5-kinase                                   |
| 3546   | 19615      | PI4P5Kn      | phosphatidylinositol 4-phosphate 5-kinase, nuclear                          |
| 3547   | 11020      | PI4PLC       | phosphatidylinositol 4-phosphate phospholipase C                            |
| 3548   | 11022      | PI4PLCn      | phosphatidylinositol 4-phosphate phospholipase C, nucleus                   |
| 3549   | 10922      | PI4PP        | phosphatidylinositol-4-phosphate 4-phosphatase                              |
| 3550   | 11042      | PI5P3K       | phosphatidylinositol-5-phosphate 3-kinase                                   |
| 3551   | 11046      | PI5P3Ker     | phosphatidylinositol-5-phosphate 3-kinase, endoplasmic reticulum            |
| 3552   | 10890      | PI5P4K       | phosphatidylinositol-5-phosphate 4-kinase                                   |
| 3553   | 19621      | PI5P4Kn      | phosphatidylinositol-5-phosphate 4-kinase, nuclear                          |
| 3554   | 11051      | PIACGT       | phosphatidylinositol N-acetylglucosaminyltransferase                        |
| 3555   | 10987      | PIK3         | phosphatidylinositol 3-kinase                                               |
| 3556   | 10990      | PIK3er       | phosphatidylinositol 3-kinase, endoplasmic reticulum                        |
| 3557   | 19606      | PIK3n        | phosphatidylinositol 3-kinase, nuclear                                      |
| 3558   | 10770      | PIK4         | phosphatidylinositol 4-kinase                                               |
| 3559   | 19618      | PIK4n        | phosphatidylinositol 4-kinase, nuclear                                      |
| 3560   | 11041      | PIK5         | phosphatidylinositol 5-kinase                                               |
| 3561   | 19620      | PIK5n        | phosphatidylinositol 5-kinase, nuclear                                      |
| 3562   | 10998      | PIPLC        | phosphatidylinositol phospholipase C                                        |
| 3563   | 11021      | PIPLCn       | phosphatidylinositol phospholipase C, nucleus                               |
| 3564   | 2757       | Pit2m        | phosphate transporter, mitochondrial                                        |
| 3565   | 6677       | Pit7         | phosphate transport in/out via three Na+ symporter                          |
| 3566   | 11904      | Pit7ir       | phosphate transport in/out via three Na+ symporter (irreversible)           |
| 3567   | 12351      | Pit8         | phosphate transport in/out via Na+ symporter                                |
| 3568   | 12352      | Pit9         | phosphate transport in/out via two Na+ symporter                            |
| 3569   | 10015      | Piter        | phosphate transport, endoplasmic reticulum                                  |
| 3570   | 15037      | Pitg         | phosphate transport, Golgi apparatus                                        |
| 3571   | 19522      | Pitn         | phosphate transport, nuclear                                                |
| 3572   | 13996      | Pitx         | Phosphate transporter, peroxisome                                           |
| 3573   | 10805      | PLA2         | phospholipase A2                                                            |
| 3574   | 10858      | PLA2_2       | phospholipase A2                                                            |
| 3575   | 12086      | PLA2_2e      | phospholipase A2                                                            |
| 3576   | 14553      | PLYSPSer     | protein lysine peptidase (endoplasmic reticulum)                            |
| 3577   | 243        | PMANM        | phosphomannomutase                                                          |
| 3578   | 9735       | PMEVKx       | phosphomevalonate kinase                                                    |
| 3579   | 10983      | PMI12346PH   | 5-diphosphoinositol-1,2,3,4,6-pentakisphosphate diphosphohydrolase          |
| 3580   | 10986      | PMI12346PHn  | 5-diphosphoinositol-1,2,3,4,6-pentakisphosphate diphosphohydrolase, nuclear |
| 3581   | 10984      | PMI1346PH    | diphosphoinositol-1,3,4,6-tetrakisphosphate diphosphohydrolase              |
| 3582   | 10985      | PMI1346PHn   | diphosphoinositol-1,3,4,6-tetrakisphosphate diphosphohydrolase, nucleus     |
| 3583   | 19036      | PMTCOAtx     | fatty acid intracellular transport                                          |
| 3584   | 15045      | PNP          | purine-nucleoside phosphorylase                                             |
| 3585   | 7471       | PNTEH        | Hydrolase Class ( RXN R02973)                                               |
| 3586   | 2788       | PNTK         | pantothenate kinase                                                         |
| 3587   | 9471       | PNTKm        | pantothenate kinase (mitochondrial)                                         |
| 3588   | 10482      | PNTOt5       | Pantothenate sodium symporter II                                            |
| 3589   | 295        | PPA          | inorganic diphosphatase                                                     |

| Column | Reaction # | Abbreviation | Reaction Name                                                            |
|--------|------------|--------------|--------------------------------------------------------------------------|
| 3590   | 12355      | PPA2         | inorganic triphosphatase                                                 |
| 3591   | 19518      | PPA2m        | inorganic triphosphatase, mitochondrial                                  |
| 3592   | 10451      | PPAP         | phosphatidic acid phosphatase                                            |
| 3593   | 10034      | PPAer        | inorganic diphosphatase, endoplasmic reticulum                           |
| 3594   | 458        | PPAm         | inorganic diphosphatase                                                  |
| 3595   | 15047      | PPAn         | inorganic diphosphatase, nuclear                                         |
| 3596   | 8421       | PPAt         | Propionate transport, diffusion                                          |
| 3597   | 8422       | PPAtm        | Propionate transport, diffusion                                          |
| 3598   | 3553       | PPBNGS       | porphobilinogen synthase                                                 |
| 3599   | 87         | PPCDC        | phosphopantothenoylecysteine decarboxylase                               |
| 3600   | 4425       | PPCOACm      | Propionyl-CoA carboxylase, mitochondrial                                 |
| 3601   | 10750      | PPCOAOm      | Propanoyl-CoA:FAD 2,3-oxidoreductase, mitochondrial                      |
| 3602   | 12665      | PPD2CSPp     | PPD2CSPp                                                                 |
| 3603   | 20257      | PPDOx        | Propane-1,2-diol:NAD+ 1-oxidoreductase                                   |
| 3604   | 9633       | PPDOy        | Propane-1,2-diol:NADP+ 1-oxidoreductase                                  |
| 3605   | 13983      | PPItr        | Diphosphate transporter, endoplasmic reticulum                           |
| 3606   | 13995      | PPItx        | Diphosphate transporter, peroxisome                                      |
| 3607   | 258        | PPM          | phosphopentomutase                                                       |
| 3608   | 19593      | PPMI12346Ptn | 5-diphosphatidylinositol pentakisphosphate nuclear transport (diffusion) |
| 3609   | 19595      | PPMI1346Ptn  | diphosphatidylinositol tetrakisphosphate nuclear transport (diffusion)   |
| 3610   | 9465       | PPNCL3       | phosphopantothenate-cysteine ligase                                      |
| 3611   | 11409      | PPOR         | Phenylpyruvate:oxygen oxidoreductase (hydroxylating,decarboxylating)     |
| 3612   | 1761       | PPPG9tm      | protoporphyrinogen IX mitochondrial transport                            |
| 3613   | 3296       | PPPGOm       | protoporphyrinogen oxidase, mitochondrial                                |
| 3614   | 19512      | PPPItn       | Inorganic triphosphate transport through nuclear pore                    |
| 3615   | 3556       | PRAGSr       | phosphoribosylglycinamide synthase                                       |
| 3616   | 3640       | PRAIS        | phosphoribosylaminoimidazole synthase                                    |
| 3617   | 3641       | PRASCS       | phosphoribosylaminoimidazolesuccinocarboxamide synthase                  |
| 3618   | 11975      | PRDX         | Peroxidase (multiple substrates)                                         |
| 3619   | 11976      | PRDXI        | Peroxidase (multiple substrates)                                         |
| 3620   | 3558       | PRFGS        | phosphoribosylformylglycinamide synthase                                 |
| 3621   | 19774      | PRGNLONESULT | steroid sulfotransferase                                                 |
| 3622   | 19795      | PRGNLONEtm   | pregnenolone intracellular transport                                     |
| 3623   | 19796      | PRGNLONEtr   | pregnenolone intracellular transport                                     |
| 3624   | 14873      | PRISTANALtx  | pristanal peroxisomal transport                                          |
| 3625   | 14874      | PRISTCOAtx   | pristcoa peroxisomal transport                                           |
| 3626   | 15132      | PRISTTx      | prist peroxisomal transport                                              |
| 3627   | 3650       | PRO1x        | proline oxidase (L-proline, NAD)                                         |
| 3628   | 3652       | PRO1xm       | proline oxidase (NAD), mitochondrial                                     |
| 3629   | 10172      | PROAKGOX1r   | L-Proline,2-oxoglutarate:oxygen oxidoreductase (4-hydroxylating) (ER)    |
| 3630   | 3642       | PROD2        | Proline dehydrogenase                                                    |
| 3631   | 10169      | PROD2m       | Proline dehydrogenase (m)                                                |
| 3632   | 11685      | PRODt2r      | D-proline reversible transport via proton symport                        |
| 3633   | 11686      | PRODt2rL     | D-proline reversible transport via proton symport (lysosome)             |
| 3634   | 12263      | PROSTGD2t    | prostaglandin transport via bicarbonate countertransport                 |
| 3635   | 12264      | PROSTGE1t    | prostaglandin transport via bicarbonate countertransport                 |
| 3636   | 12625      | PROSTGE1t3   | prostaglandine E1 transport (ATP-dependent)                              |
| 3637   | 12265      | PROSTGE2t    | prostaglandin transport via bicarbonate countertransport                 |
| 3638   | 12279      | PROSTGE2t2   | prostaglandin uniport                                                    |
| 3639   | 12626      | PROSTGE2t3   | prostaglandine E2 transport (ATP-dependent)                              |

| Column | Reaction # | Abbreviation | Reaction Name                                                    |
|--------|------------|--------------|------------------------------------------------------------------|
| 3640   | 12280      | PROSTGF2t    | prostaglandin uniport                                            |
| 3641   | 1368       | PROt2r       | L-proline reversible transport via proton symport                |
| 3642   | 11682      | PROt2rL      | L-proline reversible transport via proton symport (lysosome)     |
| 3643   | 1802       | PROt4        | Na+/Proline-L symporter                                          |
| 3644   | 11946      | PROt4(2)r    | Proline transport (sodium symport) (2:1)                         |
| 3645   | 1502       | PROtm        | L-proline transport, mitochondrial                               |
| 3646   | 9818       | PRPNCOAHYDm  | Propenoyl-CoA hydrolase (m)                                      |
| 3647   | 9817       | PRPNCOAHYDx  | Propenoyl-CoA hydrolase (x)                                      |
| 3648   | 343        | PRPPS        | phosphoribosylpyrophosphate synthetase                           |
| 3649   | 11823      | PSDm_hs      | Phosphatidylserine decarboxylase                                 |
| 3650   | 913        | PSERT        | phosphoserine transaminase                                       |
| 3651   | 15006      | PSFLIP       | phosphatidylserine flippase                                      |
| 3652   | 15008      | PSFLIPm      | phosphatidylserine flippase                                      |
| 3653   | 4642       | PSP_L        | phosphoserine phosphatase (L-serine)                             |
| 3654   | 10545      | PSSA1_hs     | Phosphatidylserine synthase homo sapiens                         |
| 3655   | 10544      | PSSA2_hs     | Phosphatidylserine synthase homo sapiens                         |
| 3656   | 15001      | PS_HSter     | phosphatidylserine scramblase                                    |
| 3657   | 15002      | PS_HStg      | phosphatidylserine scramblase                                    |
| 3658   | 14862      | PTDCACRNCPT1 | carnitine fatty-acyl transferase                                 |
| 3659   | 14863      | PTDCACRNCPT2 | pentadecanoate transport into the mitochondria                   |
| 3660   | 14867      | PTDCACRNt    | pentadecanoate transport into the mitochondria                   |
| 3661   | 19807      | PTDCAt       | fatty acid transport via diffusion                               |
| 3662   | 13833      | PTE2x        | peroxisomal acyl-CoA thioesterase                                |
| 3663   | 14143      | PTE3x        | peroxisomal acyl-CoA thioesterase                                |
| 3664   | 14144      | PTE4x        | peroxisomal acyl-CoA thioesterase                                |
| 3665   | 14145      | PTE5x        | peroxisomal acyl-CoA thioesterase                                |
| 3666   | 7821       | PTHPS        | 6-pyruvoyltetrahydropterin synthase                              |
| 3667   | 11636      | PTHPSn       | 6-pyruvoyltetrahydropterin synthase, nuclear                     |
| 3668   | 89         | PTPAT        | pantetheine-phosphate adenyltransferase                          |
| 3669   | 10641      | PTRCAT1      | Putrescine acetyltransferase                                     |
| 3670   | 10635      | PTRCOX1      | Putrescine:oxygen oxidoreductase (deaminating)                   |
| 3671   | 134        | PUNP1        | purine-nucleoside phosphorylase (Adenosine)                      |
| 3672   | 135        | PUNP2        | purine-nucleoside phosphorylase (Deoxyadenosine)                 |
| 3673   | 136        | PUNP3        | purine-nucleoside phosphorylase (Guanosine)                      |
| 3674   | 137        | PUNP4        | purine-nucleoside phosphorylase (Deoxyguanosine)                 |
| 3675   | 420        | PUNP5        | purine-nucleoside phosphorylase (Inosine)                        |
| 3676   | 421        | PUNP6        | purine-nucleoside phosphorylase (Deoxyinosine)                   |
| 3677   | 422        | PUNP7        | purine-nucleoside phosphorylase (Xanthosine)                     |
| 3678   | 11316      | PVD3         | Previtamin D3 formation                                          |
| 3679   | 11024      | PYAM5POr     | pyridoxamine 5'-phosphate oxidase                                |
| 3680   | 14578      | PYAM5Ptm     | Pyridoxamine 5'-phosphate transport via diffusion, mitochondrial |
| 3681   | 1727       | PYDAMK       | pyridoxamine kinase                                              |
| 3682   | 10952      | PYDAMtr      | pyridoxamine transport via diffusion                             |
| 3683   | 14577      | PYDX5Ptm     | Pyridoxal 5'-phosphate transport via diffusion, mitochondrial    |
| 3684   | 10953      | PYDXDH       | pyridoxal dehydrogenase                                          |
| 3685   | 3019       | PYDXK        | pyridoxal kinase                                                 |
| 3686   | 1726       | PYDXNK       | pyridoxine kinase                                                |
| 3687   | 10951      | PYDXNtr      | pyridoxine transport via diffusion                               |
| 3688   | 1820       | PYDXPP       | Pyridoxal 5-phosphate phosphatase                                |
| 3689   | 10950      | PYDXtr       | pyridoxal transport via diffusion                                |
| 3690   | 265        | PYK          | pyruvate kinase                                                  |
| 3691   | 11031      | PYLALDOX     | Perillyl aldehyde:NAD+ oxidoreductase                            |
| 3692   | 11032      | PYLALDOXm    | Perillyl aldehyde:NAD+ oxidoreductase (m)                        |

| Column | Reaction # | Abbreviation | Reaction Name                                       |
|--------|------------|--------------|-----------------------------------------------------|
| 3693   | 1083       | PYNP2r       | pyrimidine-nucleoside phosphorylase (uracil)        |
| 3694   | 876        | PYRt2m       | pyruvate mitochondrial transport via proton symport |
| 3695   | 2279       | PYRt2p       | pyruvate peroxisomal transport via proton symport   |
| 3696   | 1828       | PYRt2r       | pyruvate reversible transport via proton symport    |
| 3697   | 9495       | QUILSYN      | Quinolate Synthase (Eukaryotic)                     |
| 3698   | 15074      | RADH         | retinal dehydrogenase                               |
| 3699   | 15076      | RADH2        | retinal dehydrogenase (NADPH)                       |
| 3700   | 19520      | RADH3        | retinal dehydrogenase                               |
| 3701   | 19521      | RADH4        | retinal dehydrogenase (NADPH)                       |
| 3702   | 15084      | RAHY         | retinoic acid hydroxylation (P450)                  |
| 3703   | 15097      | RAI1         | retinal isomerase (11-cis)                          |
| 3704   | 15096      | RAI2         | retinal isomerase (9-cis)                           |
| 3705   | 15116      | RAI3         | 13-cis-retinoic acid isomerase                      |
| 3706   | 15119      | RAI4         | 13-cis-4-oxo-retinoic acid isomerase                |
| 3707   | 15078      | RAtn         | Retinoate transport, nuclear                        |
| 3708   | 15120      | RAtn3        | 13-cis-retinoic acid transport, nuclear             |
| 3709   | 119        | RBFK         | riboflavin kinase                                   |
| 3710   | 255        | RBK          | ribokinase                                          |
| 3711   | 54         | RBK_D        | D-ribulokinase                                      |
| 3712   | 19568      | RBTt         | ribitol transport via passive diffusion             |
| 3713   | 11011      | RDH1         | retinol dehydrogenase (all-trans)                   |
| 3714   | 11015      | RDH1a        | retinol dehydrogenase (all-trans,NADPH)             |
| 3715   | 11013      | RDH2         | retinol dehydrogenase (9-cis,NADH)                  |
| 3716   | 11016      | RDH2a        | retinol dehydrogenase (9-cis,NADPH)                 |
| 3717   | 11014      | RDH3         | retinol dehydrogenase (11-cis,NADH)                 |
| 3718   | 11017      | RDH3a        | retinol dehydrogenase (11-cis,NADPH)                |
| 3719   | 15154      | RDH4         | retinol dehydrogenase (13-cis,NADH)                 |
| 3720   | 15062      | RETFA        | retinol acyltransferase                             |
| 3721   | 15091      | RETFAt       | fatty acid retinol efflux                           |
| 3722   | 15112      | RETFAt1      | fatty acid retinol efflux (9-cis)                   |
| 3723   | 15111      | RETFAt2      | fatty acid retinol efflux (11-cis)                  |
| 3724   | 15071      | RETH         | retinyl ester hydrolase                             |
| 3725   | 15102      | RETH1        | retinyl ester hydrolase (9-cis)                     |
| 3726   | 15104      | RETH1e       | retinyl ester hydrolase (9-cis), extracellular      |
| 3727   | 15109      | RETH2        | retinyl ester hydrolase (11-cis)                    |
| 3728   | 15110      | RETH2e       | retinyl ester hydrolase (11-cis), extracellular     |
| 3729   | 15069      | RETHe        | retinyl ester hydrolase, extracellular              |
| 3730   | 15100      | RETI1        | retinol isomerase (11-cis)                          |
| 3731   | 15101      | RETI2        | retinol isomerase (9-cis)                           |
| 3732   | 19519      | RETI3        | retinol isomerase (13-cis)                          |
| 3733   | 15087      | RETNCOA      | Retinoyl CoA formation                              |
| 3734   | 15092      | RETNGLCt     | retinoyl glucuronide efflux                         |
| 3735   | 20310      | RETNGLCt2    | retinoyl glucuronide efflux (13-cis)                |
| 3736   | 20312      | RETNGLCt2r   | retinoyl glucuronide efflux (13-cis) from ER        |
| 3737   | 20311      | RETNGLCtr    | retinoyl glucuronide efflux from ER                 |
| 3738   | 15113      | RETNt        | retinoic acid transport                             |
| 3739   | 20313      | RETNtr       | retinoic acid transport in ER                       |
| 3740   | 20314      | RETNtr2      | retinoic acid transport in ER (13-cis)              |
| 3741   | 10968      | REt          | Retinol transport via facilitated diffusion         |
| 3742   | 9512       | RIBFLVt3     | riboflavin transport (ATP dependent)                |
| 3743   | 19566      | RIBt         | ribose transport via diffusion                      |
| 3744   | 1554       | RIBt2        | ribose transport in via proton symporter            |
| 3745   | 423        | RNDR1        | ribonucleoside-diphosphate reductase (ADP)          |
| 3746   | 424        | RNDR2        | ribonucleoside-diphosphate reductase (GDP)          |
| 3747   | 425        | RNDR3        | ribonucleoside-diphosphate reductase (CDP)          |
| 3748   | 426        | RNDR4        | ribonucleoside-diphosphate reductase (UDP)          |

| Column | Reaction # | Abbreviation     | Reaction Name                                                   |
|--------|------------|------------------|-----------------------------------------------------------------|
| 3749   | 144        | RNMK             | ribosylnicotinamide kinase                                      |
| 3750   | 281        | RPE              | ribulose 5-phosphate 3-epimerase                                |
| 3751   | 280        | RPI              | ribose-5-phosphate isomerase                                    |
| 3752   | 14299      | RTOT1            | R total flux                                                    |
| 3753   | 14325      | RTOT2            | R total flux                                                    |
| 3754   | 14334      | RTOT3            | R total flux                                                    |
| 3755   | 14341      | RTOT4            | R total flux                                                    |
| 3756   | 14349      | RTOT5            | R total flux                                                    |
| 3757   | 14351      | RTOT6            | R total flux                                                    |
| 3758   | 14269      | RTOTAL2CRNCPT1   | carnitine fatty-acyl transferase                                |
| 3759   | 14272      | RTOTAL2CRNCPT2   | R group transport into the mitochondria                         |
| 3760   | 14275      | RTOTAL2CRNt      | R group transport into the mitochondria                         |
| 3761   | 14270      | RTOTAL3CRNCPT1   | carnitine fatty-acyl transferase                                |
| 3762   | 14273      | RTOTAL3CRNCPT2   | R group transport into the mitochondria                         |
| 3763   | 14276      | RTOTAL3CRNt      | R group transport into the mitochondria                         |
| 3764   | 14267      | RTOTALCRNCPT1    | carnitine fatty-acyl transferase                                |
| 3765   | 14271      | RTOTALCRNCPT2    | R group transport into the mitochondria                         |
| 3766   | 14274      | RTOTALCRNt       | R group transport into the mitochondria                         |
| 3767   | 14326      | RTOT_2           | R total flux 2 position                                         |
| 3768   | 14327      | RTOT_3           | R total flux 3 position                                         |
| 3769   | 20325      | Rtotaltl         | fatty acid intracellular transport                              |
| 3770   | 20326      | Rtotaltp         | fatty acid intracellular transport                              |
| 3771   | 11393      | S23T2g           | beta-galactoside alpha-2,3-sialyltransferase (core 2)           |
| 3772   | 11407      | S23T3g           | beta-galactoside alpha-2,3-sialyltransferase (complex N-glycan) |
| 3773   | 11520      | S23T4g           | beta-galactoside alpha-2,3-sialyltransferase                    |
| 3774   | 8573       | S23Tg            | beta-galactoside alpha-2,3-sialyltransferase (T antigen)        |
| 3775   | 7767       | S26Tg            | beta-galactoside alpha-2,6-sialyltransferase                    |
| 3776   | 15053      | S2L2FN2M2MASNt   | s2l2fn2m2masn transport, Golgi to extracellular                 |
| 3777   | 15049      | S2L2FN2M2MASNtly | s2l2fn2m2masn transport, extracellular to lysosome              |
| 3778   | 15050      | S2L2N2M2MASNtly  | s2l2n2m2masn transport, extracellular to lysosome               |
| 3779   | 11573      | S2T1g            | chondroitin 2-sulfotransferase, Golgi                           |
| 3780   | 11578      | S2T2g            | chondroitin 2-sulfotransferase, Golgi                           |
| 3781   | 11607      | S2T3g            | uronyl 2-sulfotransferase, Golgi                                |
| 3782   | 11629      | S2T4g            | uronyl 2-sulfotransferase, Golgi                                |
| 3783   | 11733      | S2TASE1ly        | iduronate-2-sulfatase, lysosomal                                |
| 3784   | 11734      | S2TASE2ly        | iduronate-2-sulfatase, lysosomal                                |
| 3785   | 14415      | S2TASE3ly        | iduronate-2-sulfatase, lysosomal                                |
| 3786   | 14433      | S2TASE4ly        | glucuronate-2-sulfatase, lysosomal                              |
| 3787   | 14434      | S2TASE5ly        | glucuronate-2-sulfatase, lysosomal                              |
| 3788   | 11678      | S3T1g            | heparin-glucosamine 3-O-sulfotransferase                        |
| 3789   | 11679      | S3T2g            | heparin-glucosamine 3-O-sulfotransferase                        |
| 3790   | 11680      | S3T3g            | heparin-glucosamine 3-O-sulfotransferase                        |
| 3791   | 14402      | S3TASE1ly        | N-acetylglucosamine-3-sulfatase, lysosomal                      |
| 3792   | 14401      | S3TASE2ly        | N-acetylglucosamine-3-sulfatase, lysosomal                      |
| 3793   | 11768      | S3TASE3ly        | N-acetylglucosamine-3-sulfatase, lysosomal                      |
| 3794   | 11564      | S4T1g            | chondroitin 4-sulfotransferase, Golgi apparatus                 |
| 3795   | 11567      | S4T2g            | chondroitin 4-sulfotransferase, Golgi apparatus                 |
| 3796   | 11596      | S4T3g            | chondroitin 4-sulfotransferase, Golgi apparatus                 |
| 3797   | 11600      | S4T4g            | chondroitin 4-sulfotransferase, Golgi apparatus                 |
| 3798   | 11601      | S4T5g            | chondroitin 4-sulfotransferase, Golgi apparatus                 |
| 3799   | 11606      | S4T6g            | chondroitin 4-sulfotransferase, Golgi apparatus                 |
| 3800   | 14404      | S4TASE1ly        | N-acetylgalactosamine-4-sulfatase, lysosomal                    |
| 3801   | 14407      | S4TASE2ly        | N-acetylgalactosamine-4-sulfatase, lysosomal                    |
| 3802   | 14411      | S4TASE3ly        | N-acetylgalactosamine-4-sulfatase, lysosomal                    |
| 3803   | 14439      | S4TASE4ly        | N-acetylgalactosamine-4-sulfatase, lysosomal                    |

| Column | Reaction # | Abbreviation | Reaction Name                                                       |
|--------|------------|--------------|---------------------------------------------------------------------|
| 3804   | 14440      | S4TASE5ly    | N-acetylgalactosamine-4-sulfatase, lysosomal                        |
| 3805   | 11466      | S6T10g       | galactose/N-acetylglucosamine 6-O-sulfotransferase, Golgi apparatus |
| 3806   | 11467      | S6T11g       | galactose/N-acetylglucosamine 6-O-sulfotransferase, Golgi apparatus |
| 3807   | 11468      | S6T12g       | galactose/N-acetylglucosamine 6-O-sulfotransferase, Golgi apparatus |
| 3808   | 11469      | S6T13g       | galactose/N-acetylglucosamine 6-O-sulfotransferase, Golgi apparatus |
| 3809   | 11470      | S6T14g       | galactose/N-acetylglucosamine 6-O-sulfotransferase, Golgi apparatus |
| 3810   | 11471      | S6T15g       | galactose/N-acetylglucosamine 6-O-sulfotransferase, Golgi apparatus |
| 3811   | 11525      | S6T16g       | galactose/N-acetylglucosamine 6-O-sulfotransferase, Golgi apparatus |
| 3812   | 11529      | S6T17g       | galactose/N-acetylglucosamine 6-O-sulfotransferase, Golgi apparatus |
| 3813   | 11531      | S6T18g       | galactose/N-acetylglucosamine 6-O-sulfotransferase, Golgi apparatus |
| 3814   | 11569      | S6T19g       | chondroitin 6-sulfotransferase, Golgi apparatus                     |
| 3815   | 11428      | S6T1g        | galactose/N-acetylglucosamine 6-O-sulfotransferase, Golgi apparatus |
| 3816   | 11572      | S6T20g       | chondroitin 6-sulfotransferase, Golgi apparatus                     |
| 3817   | 11577      | S6T21g       | chondroitin 6-sulfotransferase, Golgi apparatus                     |
| 3818   | 11593      | S6T22g       | chondroitin 6-sulfotransferase, Golgi apparatus                     |
| 3819   | 11597      | S6T23g       | chondroitin 6-sulfotransferase, Golgi apparatus                     |
| 3820   | 11602      | S6T24g       | chondroitin 6-sulfotransferase, Golgi apparatus                     |
| 3821   | 11630      | S6T25g       | heparan sulfate 6-sulfotransferase, Golgi apparatus                 |
| 3822   | 11431      | S6T2g        | galactose/N-acetylglucosamine 6-O-sulfotransferase, Golgi apparatus |
| 3823   | 11433      | S6T3g        | galactose/N-acetylglucosamine 6-O-sulfotransferase, Golgi apparatus |
| 3824   | 11438      | S6T4g        | galactose/N-acetylglucosamine 6-O-sulfotransferase, Golgi apparatus |
| 3825   | 11461      | S6T5g        | galactose/N-acetylglucosamine 6-O-sulfotransferase, Golgi apparatus |
| 3826   | 11462      | S6T6g        | galactose/N-acetylglucosamine 6-O-sulfotransferase, Golgi apparatus |
| 3827   | 11463      | S6T7g        | galactose/N-acetylglucosamine 6-O-sulfotransferase, Golgi apparatus |
| 3828   | 11464      | S6T8g        | galactose/N-acetylglucosamine 6-O-sulfotransferase, Golgi apparatus |
| 3829   | 11465      | S6T9g        | galactose/N-acetylglucosamine 6-O-sulfotransferase, Golgi apparatus |
| 3830   | 14459      | S6TASE10ly   | galactose-6-sulfate sulfatase, lysosomal                            |
| 3831   | 14461      | S6TASE11ly   | N-acetylglucosamine-6-sulfatase, lysosomal                          |
| 3832   | 14465      | S6TASE12ly   | N-acetylglucosamine-6-sulfatase, lysosomal                          |
| 3833   | 14477      | S6TASE13ly   | N-acetylglucosamine-6-sulfatase, lysosomal                          |
| 3834   | 14478      | S6TASE14ly   | N-acetylglucosamine-6-sulfatase, lysosomal                          |
| 3835   | 14479      | S6TASE15ly   | N-acetylglucosamine-6-sulfatase, lysosomal                          |
| 3836   | 14480      | S6TASE16ly   | N-acetylglucosamine-6-sulfatase, lysosomal                          |
| 3837   | 14481      | S6TASE17ly   | N-acetylglucosamine-6-sulfatase, lysosomal                          |
| 3838   | 14482      | S6TASE18ly   | N-acetylglucosamine-6-sulfatase, lysosomal                          |
| 3839   | 14483      | S6TASE19ly   | N-acetylglucosamine-6-sulfatase, lysosomal                          |
| 3840   | 14389      | S6TASE1ly    | N-acetylglucosamine-6-sulfatase, lysosomal                          |
| 3841   | 14484      | S6TASE20ly   | N-acetylglucosamine-6-sulfatase, lysosomal                          |

| Column | Reaction # | Abbreviation | Reaction Name                                                                           |
|--------|------------|--------------|-----------------------------------------------------------------------------------------|
| 3842   | 14485      | S6TASE21ly   | N-acetylglucosamine-6-sulfatase, lysosomal                                              |
| 3843   | 14519      | S6TASE22ly   | galactose-6-sulfate sulfatase, lysosomal                                                |
| 3844   | 14521      | S6TASE23ly   | N-acetylglucosamine-6-sulfatase, lysosomal                                              |
| 3845   | 14522      | S6TASE24ly   | N-acetylglucosamine-6-sulfatase, lysosomal                                              |
| 3846   | 14523      | S6TASE25ly   | galactose-6-sulfate sulfatase, lysosomal                                                |
| 3847   | 14524      | S6TASE26ly   | N-acetylglucosamine-6-sulfatase, lysosomal                                              |
| 3848   | 14393      | S6TASE2ly    | N-acetylglucosamine-6-sulfatase, lysosomal                                              |
| 3849   | 14394      | S6TASE3ly    | N-acetylglucosamine-6-sulfatase, lysosomal                                              |
| 3850   | 14419      | S6TASE4ly    | N-acetylglucosamine-6-sulfatase, lysosomal                                              |
| 3851   | 14423      | S6TASE5ly    | N-acetylglucosamine-6-sulfatase, lysosomal                                              |
| 3852   | 14429      | S6TASE6ly    | N-acetylglucosamine-6-sulfatase, lysosomal                                              |
| 3853   | 14435      | S6TASE7ly    | N-acetylglucosamine-6-sulfatase, lysosomal                                              |
| 3854   | 14441      | S6TASE8ly    | N-acetylglucosamine-6-sulfatase, lysosomal                                              |
| 3855   | 14442      | S6TASE9ly    | N-acetylglucosamine-6-sulfatase, lysosomal                                              |
| 3856   | 10882      | SACCD3m      | saccharopine dehydrogenase (NADP, L-lysine forming), mitochondrial                      |
| 3857   | 10883      | SACCD4m      | saccharopine dehydrogenase (NAD, L-glutamate forming), mitochondrial                    |
| 3858   | 2866       | SADT         | sulfate adenyltransferase                                                               |
| 3859   | 12100      | SALMCOM      | S-Adenosyl-L-methionine:catechol O-methyltransferase                                    |
| 3860   | 11919      | SALMCOM2     | S-Adenosyl-L-methionine:catechol O-methyltransferase                                    |
| 3861   | 9355       | SAMHISTA     | S-Adenosyl-L-methionine:histamine N-tele-methyltransferase                              |
| 3862   | 9935       | SARCOXp      | sarcosine oxidase, peroxisomal                                                          |
| 3863   | 14628      | SARCStex     | Sarcosine transport (extracellular to cytosol)                                          |
| 3864   | 14646      | SARCStm      | Sarcosine transport (mitochondrial)                                                     |
| 3865   | 14638      | SARCStp      | Sarcosine transport (peroxisomal)                                                       |
| 3866   | 9728       | SARDHm       | Sarcosine dehydrogenase (m)                                                             |
| 3867   | 5555       | SBPP1er      | sphingoid base-phosphate phosphatase (sphinganine 1-phosphatase), endoplasmic reticulum |
| 3868   | 11192      | SBPP3er      | sphingoid base-phosphate phosphatase (sphinganine 1-phosphatase), endoplasmic reticulum |
| 3869   | 2050       | SBTD_D2      | D-sorbitol dehydrogenase (D-fructose producing)                                         |
| 3870   | 3355       | SBTR         | D-sorbitol reductase                                                                    |
| 3871   | 13147      | SCP21x       | Sterol carrier protein 2                                                                |
| 3872   | 13148      | SCP22x       | Sterol carrier protein 2                                                                |
| 3873   | 13935      | SCP2x        | peroxisomal thiolase 2                                                                  |
| 3874   | 13964      | SCP3x        | peroxisomal thiolase 2                                                                  |
| 3875   | 9702       | SCPx         | peroxisomal thiolase 2                                                                  |
| 3876   | 10019      | SEAHCYSHYD   | Se-Adenosylselenohomocysteine hydrolase                                                 |
| 3877   | 11513      | SEAHCYStn    | Se-adenosyl-seleno-L-homocysteine nuclear transport                                     |
| 3878   | 11512      | SEASMETtn    | Se-adenosyl-seleno-L-methionine nuclear transport                                       |
| 3879   | 10023      | SELADT       | selenate adenyltransferase                                                              |
| 3880   | 10025      | SELCYSLY     | selenocysteine lyase                                                                    |
| 3881   | 20665      | SELCYSLY2    | selenocysteine lyase                                                                    |
| 3882   | 10017      | SELCYSTGL    | selanocystathionine g-lyase                                                             |
| 3883   | 10018      | SELCYSTS     | selanocystathionine beta-synthase                                                       |
| 3884   | 10022      | SELMETAT     | selenomethionine adenyltransferase                                                      |
| 3885   | 2456       | SELNPS       | Selenophosphate synthase                                                                |
| 3886   | 12164      | SELt4_3      | selenate transport via sodium symport                                                   |
| 3887   | 11835      | SERALANaEx   | L-alanine/L-serine Na-dependent exchange (Ser-L in)                                     |
| 3888   | 11853      | SERASNNaEx   | L-serine/L-asparagine Na-dependent exchange (Ser-L in)                                  |
| 3889   | 11840      | SERCYSNaEx   | L-serine/L-cysteine Na-dependent exchange (Ser-L in)                                    |
| 3890   | 11794      | SERDGLNexR   | D-Serine/Glutamine reversible exchange                                                  |
| 3891   | 11793      | SERDGLYexR   | D-Serine/Glycine reversible exchange                                                    |
| 3892   | 11851      | SERGLNNaEx   | L-serine/L-glutamine Na-dependent exchange (Ser-L in)                                   |

| Column | Reaction # | Abbreviation | Reaction Name                                                                     |
|--------|------------|--------------|-----------------------------------------------------------------------------------|
| 3893   | 11792      | SERGLNexR    | L-Serine/Glutamine reversible exchange                                            |
| 3894   | 11791      | SERGLYexR    | L-Serine/Glycine reversible exchange                                              |
| 3895   | 13491      | SERHL        | L-Serine hydro-lyase                                                              |
| 3896   | 20496      | SERLYSNaex   | Serine/Lysine Na-dependent exchange (Ser in)                                      |
| 3897   | 1878       | SERPT        | serine C-palmitoyltransferase                                                     |
| 3898   | 11842      | SERTHRNaEx   | L-serine/L-threonine Na-dependent exchange (Ser-L in)                             |
| 3899   | 3430       | SERt4        | L-serine via sodium symport                                                       |
| 3900   | 11923      | SERtN1       | Serine transport (Na, H coupled)                                                  |
| 3901   | 14769      | SERtp        | L-serine transport, peroxisomal                                                   |
| 3902   | 2374       | SFGTH        | S-Formylglutathione hydralase                                                     |
| 3903   | 20134      | SGALSIDEtg   | sgalside_hs intracellular transport                                               |
| 3904   | 20133      | SGALSIDEtl   | sgalside_hs intracellular transport                                               |
| 3905   | 11268      | SGPL11r      | Sphingosine-1-phosphate lyase 1                                                   |
| 3906   | 19742      | SGPL12r      | Sphingosine-1-phosphate lyase                                                     |
| 3907   | 8434       | SIAASE       | sialidase                                                                         |
| 3908   | 14458      | SIAASE2ly    | sialidase, lysosomal                                                              |
| 3909   | 14517      | SIAASE3ly    | sialidase, lysosomal                                                              |
| 3910   | 14518      | SIAASE4ly    | sialidase, lysosomal                                                              |
| 3911   | 8543       | SIAASEly     | sialidase, lysosomal                                                              |
| 3912   | 11083      | SIAT4Bg      | Beta-galactoside alpha-2,3-sialyltransferase, Golgi apparatus                     |
| 3913   | 11096      | SIAT9g       | Lactosylceramide alpha-2,3-sialyltransferase, Golgi apparatus                     |
| 3914   | 2395       | SLCBK1       | sphingolipid long chain base kinase (sphinganine)                                 |
| 3915   | 14569      | SLDt         | L-sulfolactate transport (cytosol to extracellular)                               |
| 3916   | 8555       | SLDx         | L-sulfolactate dehydrogenase (NAD+)                                               |
| 3917   | 14568      | SLDxm        | L-sulfolactate dehydrogenase (NAD+), mitochondrial                                |
| 3918   | 11279      | SMPD3g       | sphingomyelin phosphodiesterase 3, neutral membrane (neutral sphingomyelinase II) |
| 3919   | 11159      | SMPD3l       | sphingomyelin phosphodiesterase 3, neutral membrane (neutral sphingomyelinase II) |
| 3920   | 20875      | SMPD4        | sphingomyelinase                                                                  |
| 3921   | 11396      | SMS          | Sphingomyelin synthase (homo sapiens)                                             |
| 3922   | 12373      | SO4CLtex2    | sulfate transport via chloride countertransport (2:1)                             |
| 3923   | 12361      | SO4HCOtex    | sulfate transport via bicarbonate countertransport                                |
| 3924   | 12370      | SO4OXAtex2   | sulfate transport via oxalate countertransport (2:1)                              |
| 3925   | 12165      | SO4t4_2      | sulfate transport via sodium symport                                              |
| 3926   | 12162      | SO4t4_3      | sulfate transport via sodium symport                                              |
| 3927   | 14309      | SOAT11       | sterol O-acyltransferase (acyl-Coenzyme A: cholesterol acyltransferase) 1         |
| 3928   | 14310      | SOAT11r      | sterol O-acyltransferase (acyl-Coenzyme A: cholesterol acyltransferase) 1         |
| 3929   | 14328      | SOAT12       | sterol O-acyltransferase (acyl-Coenzyme A: cholesterol acyltransferase) 1         |
| 3930   | 14329      | SOAT12r      | sterol O-acyltransferase (acyl-Coenzyme A: cholesterol acyltransferase) 1         |
| 3931   | 20876      | SPC_HSt      | sphingosylphosphorylcholine transport (diffusion)                                 |
| 3932   | 20204      | SPH1Pte      | sph1p transport                                                                   |
| 3933   | 20205      | SPH1Ptr      | sph1p intracellular transport                                                     |
| 3934   | 19743      | SPHGPtr      | sphinganine intracellular transport                                               |
| 3935   | 19728      | SPHINGStl    | sphingosine intracellular transport                                               |
| 3936   | 19727      | SPHINGStr    | sphingosine intracellular transport                                               |
| 3937   | 11162      | SPHK21c      | sphingosine kinase 2                                                              |
| 3938   | 19741      | SPHMDAc      | sphingomyelin deacylase                                                           |
| 3939   | 20125      | SPHMYLNtg    | sphingomyelin intracellular transport                                             |
| 3940   | 20124      | SPHMYLNtl    | sphingomyelin intracellular transport                                             |



| Column | Reaction # | Abbreviation | Reaction Name                                                                           |
|--------|------------|--------------|-----------------------------------------------------------------------------------------|
| 3941   | 19729      | SPHS1Pte     | sphingosine-1-phosphate transport                                                       |
| 3942   | 20206      | SPHS1Ptr     | sphingosine-1-phosphate transport                                                       |
| 3943   | 11295      | SPMDOX       | Spermidine:(acceptor) oxidoreductase                                                    |
| 3944   | 312        | SPMS         | spermidine synthase                                                                     |
| 3945   | 2518       | SPODM        | superoxide dismutase                                                                    |
| 3946   | 13662      | SPODMe       | superoxide dismutase, extracellular                                                     |
| 3947   | 4915       | SPODMm       | superoxide dismutase                                                                    |
| 3948   | 13671      | SPODMn       | superoxide dismutase, nuclear                                                           |
| 3949   | 13669      | SPODMx       | superoxide dismutase, peroxisome                                                        |
| 3950   | 11638      | SPR          | sepiapterin reductase                                                                   |
| 3951   | 1342       | SPRMS        | spermine synthase                                                                       |
| 3952   | 14586      | SPRn         | sepiapterin reductase, nuclear                                                          |
| 3953   | 14005      | SPTix        | serine-pyruvate aminotransferase (irreversible), peroxisomal                            |
| 3954   | 2011       | SQLEr        | Squalene epoxidase, endoplasmic reticular (NADP)                                        |
| 3955   | 9744       | SQLSr        | Squalene synthase                                                                       |
| 3956   | 20866      | SR5AR2r      | 3-oxo-5-alpha-steroid 4-dehydrogenase                                                   |
| 3957   | 9965       | SR5ARr       | 3-oxo-5-alpha-steroid 4-dehydrogenase                                                   |
| 3958   | 9611       | SRTN23OX     | 5-Hydroxytryptamine:oxygen 2,3-dioxygenase (indole-decyclizing)                         |
| 3959   | 9607       | SRTNACT      | Acetyl-CoA:aralkylamine N-acetyltransferase                                             |
| 3960   | 9613       | SRTNMTX      | S-Adenosyl-L-methionine:amine N-methyltransferase (srtn)                                |
| 3961   | 12189      | SRTNt6(2)r   | Serotonin reversible transport in via sodium symport/potassium antiport (1:2)           |
| 3962   | 12191      | SRTNtu       | Serotonin uniport                                                                       |
| 3963   | 10873      | SSALxm       | succinate-semialdehyde dehydrogenase (NAD) reversible (mitochondrial)                   |
| 3964   | 11126      | ST3GAL21g    | CMP-N-acetylneuraminate-beta-galactosamide-alpha-2,3-sialyltransferase, Golgi apparatus |
| 3965   | 11129      | ST3GAL22g    | CMP-N-acetylneuraminate-beta-galactosamide-alpha-2,3-sialyltransferase, Golgi apparatus |
| 3966   | 11130      | ST3GAL23g    | CMP-N-acetylneuraminate-beta-galactosamide-alpha-2,3-sialyltransferase, Golgi apparatus |
| 3967   | 14597      | ST3GAL31g    | ST3 beta-galactoside alpha-2,3-sialyltransferase 3                                      |
| 3968   | 14624      | ST3GAL61g    | Type 2 lactosamine alpha-2,3-sialyltransferase                                          |
| 3969   | 14641      | ST3GAL62g    | Type 2 lactosamine alpha-2,3-sialyltransferase                                          |
| 3970   | 11104      | ST6GALNAC21  | Alpha-N-acetylgalactosaminide alpha-2,6-sialyltransferase 2                             |
| 3971   | 11105      | ST6GALNAC22  | Alpha-N-acetylgalactosaminide alpha-2,6-sialyltransferase 2                             |
| 3972   | 11107      | ST6GALNAC23  | Alpha-N-acetylgalactosaminide alpha-2,6-sialyltransferase 2                             |
| 3973   | 11108      | ST6GALNAC24  | Alpha-N-acetylgalactosaminide alpha-2,6-sialyltransferase 2                             |
| 3974   | 11109      | ST6GALNAC25  | Alpha-N-acetylgalactosaminide alpha-2,6-sialyltransferase 2                             |
| 3975   | 11110      | ST6GALNAC26  | Alpha-N-acetylgalactosaminide alpha-2,6-sialyltransferase 2                             |
| 3976   | 11111      | ST6GALNAC27  | Alpha-N-acetylgalactosaminide alpha-2,6-sialyltransferase 2                             |
| 3977   | 11112      | ST6GALNAC28  | Alpha-N-acetylgalactosaminide alpha-2,6-sialyltransferase 2                             |
| 3978   | 11119      | ST6GALNAC31  | Alpha-N-acetylgalactosaminide alpha-2,6-sialyltransferase 3                             |

| Column | Reaction # | Abbreviation | Reaction Name                                                                                                                  |
|--------|------------|--------------|--------------------------------------------------------------------------------------------------------------------------------|
| 3979   | 11400      | ST6GALNAC61  | sialyltransferase 7 ((alpha-N-acetylneuraminyl 2,3-betagalactosyl-1,3)-N-acetyl galactosaminide alpha-2,6-sialyltransferase) F |
| 3980   | 11125      | ST6GALNAC62  | sialyltransferase 7 ((alpha-N-acetylneuraminyl 2,3-betagalactosyl-1,3)-N-acetyl galactosaminide alpha-2,6-sialyltransferase) F |
| 3981   | 11085      | ST8SIA11     | Beta-galactoside alpha-2,3-sialyltransferase                                                                                   |
| 3982   | 11086      | ST8SIA12     | Beta-galactoside alpha-2,3-sialyltransferase                                                                                   |
| 3983   | 11087      | ST8SIA51g    | Beta-galactoside alpha-2,3-sialyltransferase                                                                                   |
| 3984   | 11113      | ST8SIA52g    | Beta-galactoside alpha-2,3-sialyltransferase                                                                                   |
| 3985   | 11114      | ST8SIA53g    | Beta-galactoside alpha-2,3-sialyltransferase                                                                                   |
| 3986   | 11115      | ST8SIA54g    | Beta-galactoside alpha-2,3-sialyltransferase                                                                                   |
| 3987   | 11291      | ST8SIA55g    | Beta-galactoside alpha-2,3-sialyltransferase                                                                                   |
| 3988   | 14625      | ST8SIA56g    | Alpha-2,8-sialyltransferase 8E                                                                                                 |
| 3989   | 19033      | STCOAtx      | fatty acid intracellular transport                                                                                             |
| 3990   | 19103      | STRDNCCPT1   | carnitine O-palmitoyltransferase                                                                                               |
| 3991   | 19122      | STRDNCCPT2   | carnitine transferase                                                                                                          |
| 3992   | 19084      | STRDNCCRnt   | transport into the mitochondria (carnitine)                                                                                    |
| 3993   | 12466      | STRDNCT      | fatty acid transport via diffusion                                                                                             |
| 3994   | 19779      | STS1         | Steryl-sulfatase                                                                                                               |
| 3995   | 12072      | STS1r        | Steryl-sulfatase                                                                                                               |
| 3996   | 19780      | STS2         | Steryl-sulfatase                                                                                                               |
| 3997   | 12073      | STS2r        | Steryl-sulfatase                                                                                                               |
| 3998   | 19782      | STS3         | Steryl-sulfatase                                                                                                               |
| 3999   | 19781      | STS3r        | Steryl-sulfatase                                                                                                               |
| 4000   | 19783      | STS4         | Steryl-sulfatase                                                                                                               |
| 4001   | 19784      | STS4r        | Steryl-sulfatase                                                                                                               |
| 4002   | 5321       | SUCCt2m      | succinate transport, mitochondrial                                                                                             |
| 4003   | 12167      | SUCCt4_2     | succinate transport via sodium symport                                                                                         |
| 4004   | 12173      | SUCCt4_3     | succinate transport via sodium symport                                                                                         |
| 4005   | 15152      | SUCCtp       | succinate transporter, peroxisome                                                                                              |
| 4006   | 1176       | SUCD1m       | succinate dehydrogenase                                                                                                        |
| 4007   | 510        | SUCOAS1m     | Succinate--CoA ligase (GDP-forming)                                                                                            |
| 4008   | 2761       | SUCOASm      | Succinate--CoA ligase (ADP-forming)                                                                                            |
| 4009   | 1547       | SUCRe        | sucrose hydrolyzing enzyme, extracellular                                                                                      |
| 4010   | 18717      | SULFOX       | sulfite oxidase                                                                                                                |
| 4011   | 11034      | T2M26DCOAHLM | trans-2-Methyl-5-isopropylhexa-2,5-dienoyl-CoA hydro-lyase (m)                                                                 |
| 4012   | 11045      | T2M26DCOAHLX | trans-2-Methyl-5-isopropylhexa-2,5-dienoyl-CoA hydro-lyase (x)                                                                 |
| 4013   | 14224      | T4HCINNMFM   | 4-hydroxycinnamate formation                                                                                                   |
| 4014   | 11049      | T4HCINNOX    | 4-Coumarate:oxygen oxidoreductase                                                                                              |
| 4015   | 19625      | TAGAT-Dt     | D-tagatose uptake via diffusion                                                                                                |
| 4016   | 282        | TALA         | transaldolase                                                                                                                  |
| 4017   | 11945      | TAURt4(2)r   | taurine transport (sodium symport) (2:1)                                                                                       |
| 4018   | 11517      | TAURtcx      | taurine transport (sodium symport) (cytosol to peroxisome)                                                                     |
| 4019   | 19707      | TAXOLte      | xenobiotic transport                                                                                                           |
| 4020   | 12268      | TCHOLAt      | taurocholate transport via bicarbonate countertransport                                                                        |
| 4021   | 12619      | TCHOLAt2     | taurocholate transport via sodium cotransport                                                                                  |
| 4022   | 12668      | TCHOLAt3     | ABC bile acid transporter                                                                                                      |
| 4023   | 19655      | TCHOLAtc     | bile acid intracellular transport                                                                                              |
| 4024   | 19656      | TCHOLAtx     | bile acid intracellular transport                                                                                              |
| 4025   | 20244      | TCYNTt       | Thiocyanate transport via diffusion (cytosol to extracellular)                                                                 |
| 4026   | 20245      | TCYNTm       | Thiocyanate transport via diffusion (mitochondrial)                                                                            |
| 4027   | 19657      | TDCHOLAtc    | bile acid intracellular transport                                                                                              |

| Column | Reaction # | Abbreviation   | Reaction Name                                                      |
|--------|------------|----------------|--------------------------------------------------------------------|
| 4028   | 19658      | TDCHOLAtx      | bile acid intracellular transport                                  |
| 4029   | 9482       | TDP            | thiamine triphosphatase                                            |
| 4030   | 2492       | TDPDRE         | dTDP-4-dehydrorhamnose 3,5-epimerase                               |
| 4031   | 2493       | TDPDRR         | dTDP-4-dehydrorhamnose reductase                                   |
| 4032   | 2490       | TDPGDH         | dTDPglucose 4,6-dehydratase                                        |
| 4033   | 14062      | TDPm           | thiamine triphosphatase, mitochondrial                             |
| 4034   | 19039      | TETHEX3COAtx   | fatty acid intracellular transport                                 |
| 4035   | 12472      | TETHEX3t       | fatty acid transport via diffusion                                 |
| 4036   | 19046      | TETPENT3COAtx  | fatty acid intracellular transport                                 |
| 4037   | 19108      | TETPENT3CPT1   | carnitine O-palmitoyltransferase                                   |
| 4038   | 19127      | TETPENT3CPT2   | carnitine transferase                                              |
| 4039   | 19090      | TETPENT3CRNt   | transport into the mitochondria (carnitine)                        |
| 4040   | 12471      | TETPENT3t      | fatty acid transport via diffusion                                 |
| 4041   | 19044      | TETPENT6COAtx  | fatty acid intracellular transport                                 |
| 4042   | 19109      | TETPENT6CPT1   | carnitine O-palmitoyltransferase                                   |
| 4043   | 19128      | TETPENT6CPT2   | carnitine transferase                                              |
| 4044   | 19089      | TETPENT6CRNt   | transport into the mitochondria (carnitine)                        |
| 4045   | 12468      | TETPENT6t      | fatty acid transport via diffusion                                 |
| 4046   | 19042      | TETTET6COAtx   | fatty acid intracellular transport                                 |
| 4047   | 19104      | TETTET6CPT1    | carnitine O-palmitoyltransferase                                   |
| 4048   | 19123      | TETTET6CPT2    | carnitine transferase                                              |
| 4049   | 19085      | TETTET6CRNt    | transport into the mitochondria (carnitine)                        |
| 4050   | 12469      | TETTET6t       | fatty acid transport via diffusion                                 |
| 4051   | 14584      | THBPT4ACAMDASE | Tetrahydrobiopterin-4a-carbinolamine dehydratase                   |
| 4052   | 14183      | THCHOLSTOICtm  | lipid, flip-flop intracellular transport                           |
| 4053   | 5323       | THD1m          | NAD(P) transhydrogenase                                            |
| 4054   | 14837      | THFt2          | tetrahydrofolate transport via anion exchange                      |
| 4055   | 14903      | THFtl          | 5,6,7,8-Tetrahydrofolate transport, diffusion, lysosomal           |
| 4056   | 1418       | THFtm          | 5,6,7,8-Tetrahydrofolate transport, diffusion, mitochondrial       |
| 4057   | 7883       | THMDt4         | thymidine transport in via sodium symport                          |
| 4058   | 12145      | THMDt5         | thymidine transport (1:2 Na/Thymd cotransport)                     |
| 4059   | 14011      | THMMPt4        | Thiamine monophosphate transport in via anion antiport             |
| 4060   | 14065      | THMMPtm        | Thiamine monophosphate transport, mitochondrial                    |
| 4061   | 3625       | THMP           | thiamin phosphatase                                                |
| 4062   | 14069      | THMPptm        | Thiamine diphosphate transport in via anion antiport, mitochondria |
| 4063   | 9481       | THMTP          | thiamine-triphosphatase                                            |
| 4064   | 14070      | THMTPt         | Thiamine triphosphate transport in via anion antiport              |
| 4065   | 14009      | THMt2m         | Thiamine transport in via proton symport, mitochondrial            |
| 4066   | 14016      | THMt3          | Thiamine transport in via proton antiport                          |
| 4067   | 12939      | THP2Ctp        | 2,3,4,5-Tetrahydropyridine-2-carboxylate transport, peroxisomal    |
| 4068   | 11839      | THRALANaEx     | L-alanine/L-threonine Na-dependent exchange (Thr-L in)             |
| 4069   | 11861      | THRASNNaEx     | L-threonine/L-asparagine Na-dependent exchange (Thr-L in)          |
| 4070   | 11845      | THRCYSNaEx     | L-cysteine/L-threonine Na-dependent exchange (Thr-L in)            |
| 4071   | 324        | THRD_L         | L-threonine deaminase                                              |
| 4072   | 11859      | THRGLNNaEx     | L-threonine/L-glutamine Na-dependent exchange (Thr-L in)           |
| 4073   | 11800      | THRGLNexR      | L-threonine/glycine reversible exchange                            |
| 4074   | 11799      | THRGLYexR      | L-threonine/glycine reversible exchange                            |
| 4075   | 365        | THRS           | threonine synthase                                                 |
| 4076   | 11843      | THRSERNaEx     | L-serine/L-threonine Na-dependent exchange (Thr-L in)              |
| 4077   | 2476       | THRt4          | L-threonine via sodium symport                                     |
| 4078   | 4021       | THYMDt1        | thymd transport                                                    |
| 4079   | 12577      | THYMDtl        | thymidine facilitated transport from lysosome                      |
| 4080   | 4011       | THYMDtm        | thymd transport                                                    |

| Column | Reaction # | Abbreviation    | Reaction Name                                                            |
|--------|------------|-----------------|--------------------------------------------------------------------------|
| 4081   | 12551      | THYMt           | thymine reversible transport via facilitated diffusion                   |
| 4082   | 12272      | THYOXt          | T4 transport via bicarbonate countertransport                            |
| 4083   | 12489      | THYOXt2         | T4 transport via facilitated diffusion                                   |
| 4084   | 12123      | THYPX           | thyroid peroxidase                                                       |
| 4085   | 283        | TKT1            | transketolase                                                            |
| 4086   | 4641       | TKT2            | transketolase                                                            |
| 4087   | 10964      | TMABADH         | 4-trimethylaminobutyraldehyde dehydrogenase                              |
| 4088   | 432        | TMDK1           | thymidine kinase (ATP:thymidine)                                         |
| 4089   | 4532       | TMDK1m          | thymidine kinase (ATP:thymidine)                                         |
| 4090   | 3871       | TMDPK           | thiamine diphosphokinase                                                 |
| 4091   | 435        | TMDPP           | thymidine phosphorylase                                                  |
| 4092   | 3352       | TMDPPK          | thiamine-diphosphate kinase                                              |
| 4093   | 431        | TMDS            | thymidylate synthase                                                     |
| 4094   | 10959      | TMLYSOX         | trimethyllysine dioxygenase                                              |
| 4095   | 14817      | TMLYSter        | trimethyl-L-lysine transport (ER to cytosol)                             |
| 4096   | 19040      | TMNDNCCOAtx     | fatty acid intracellular transport                                       |
| 4097   | 19105      | TMNDNCCPT1      | carnitine O-palmitoyltransferase                                         |
| 4098   | 19124      | TMNDNCCPT2      | carnitine transferase                                                    |
| 4099   | 19086      | TMNDNCCRNt      | transport into the mitochondria (carnitine)                              |
| 4100   | 12465      | TMNDNCt         | fatty acid transport via diffusion                                       |
| 4101   | 19708      | TOLBUTAMIDEte   | xenobiotic transport                                                     |
| 4102   | 276        | TPI             | triose-phosphate isomerase                                               |
| 4103   | 2817       | TRDR            | thioredoxin reductase (NADPH)                                            |
| 4104   | 10104      | TRDR2           | Thioredoxin (ubiquinone 10) reductase (NADPH)                            |
| 4105   | 10105      | TRDR3           | Thioredoxin (ubiquinone 10) reductase (NADH)                             |
| 4106   | 1436       | TRDRm           | thioredoxin reductase (NADPH)                                            |
| 4107   | 695        | TREH            | alpha,alpha-trehalase                                                    |
| 4108   | 2462       | TREHe           | alpha,alpha-trehalase                                                    |
| 4109   | 19422      | TRIODTHYSUFt    | Triiodothyronine sulfate transport (diffusion)                           |
| 4110   | 12107      | TRIODTHYSULT    | Triiodothyronine Sulfotransferase                                        |
| 4111   | 12273      | TRIODTHYt       | T3 transport via bicarbonate countertransport                            |
| 4112   | 12490      | TRIODTHYt2      | T3 transport via facilitated diffusion                                   |
| 4113   | 11870      | TRIOK           | trio kinase                                                              |
| 4114   | 14583      | TRPHYDRO2       | L-Tryptophan,tetrahydrobiopterin:oxygen oxidoreductase (5-hydroxylating) |
| 4115   | 1389       | TRPO2           | L-Tryptophan:oxygen 2,3-oxidoreductase (deacylizing)                     |
| 4116   | 12567      | TRPt            | L-tryptophan transport                                                   |
| 4117   | 11951      | TRPt4           | L-tryptophan transport in via sodium symport                             |
| 4118   | 9585       | TRYPTAOX        | Tryptamine:oxygen oxidoreductase(deaminating)(flavin-containing)         |
| 4119   | 11319      | TS3             | Tachysterol 3 formation                                                  |
| 4120   | 19768      | TSTSTERONEGLCte | glucuronidated compound transport                                        |
| 4121   | 19759      | TSTSTERONEGLCtr | glucuronidated compound transport                                        |
| 4122   | 20335      | TSTSTERONESULT  | testosterone sulfotransferase                                            |
| 4123   | 20337      | TSTSTERONESte   | sulfonated testosterone transport                                        |
| 4124   | 14984      | TSTSTERONEtr    | testosterone intracellular transport                                     |
| 4125   | 12163      | TSULt4_3        | thiosulfate transport via sodium symport                                 |
| 4126   | 1924       | TTDCAt          | Tetradecanoate (n-C14:0) transport in via uniport                        |
| 4127   | 20625      | TTDCPT1         | carnitine O-palmitoyltransferase                                         |
| 4128   | 20626      | TTDCPT2         | carnitine transferase                                                    |
| 4129   | 20624      | TTDCRNt         | transport into the mitochondria (carnitine)                              |
| 4130   | 20860      | TXA2te          | thromboxane A2 transport                                                 |
| 4131   | 20332      | TXA2tr          | thromboxane A2 intracellular transport                                   |
| 4132   | 10004      | TXASr           | Thromboxane-A synthase                                                   |
| 4133   | 19423      | TYMSFt          | Tyramine O-sulfate transport (diffusion)                                 |
| 4134   | 12104      | TYMSULT         | Tyramine Sulfotransferase                                                |

| Column | Reaction # | Abbreviation | Reaction Name                                                            |
|--------|------------|--------------|--------------------------------------------------------------------------|
| 4135   | 14587      | TYR3MO2      | tyrosine 3-monoxygenase                                                  |
| 4136   | 9390       | TYRASE       | Tyrosinase                                                               |
| 4137   | 11604      | TYRCBOX      | L-Tyrosine carboxy-lyase                                                 |
| 4138   | 10557      | TYRDOPO      | Tyrosine:dopa oxidase                                                    |
| 4139   | 10559      | TYRDOPO3     | Tyrosine:dopa oxidase (dopaquinone producing 2)                          |
| 4140   | 11608      | TYROXDAc     | Tyramine:oxygen oxidoreductase(deaminating)(flavin-containing) (cytosol) |
| 4141   | 331        | TYRTA        | tyrosine transaminase                                                    |
| 4142   | 1402       | TYRTAm       | tyrosine transaminase, mitochondrial                                     |
| 4143   | 12566      | TYRt         | L-tyrosine transport                                                     |
| 4144   | 11950      | TYRt4        | L-tyrosine transport in via sodium symport                               |
| 4145   | 10594      | UAG2EMAi     | UDP-N-acetyl-D-glucosamine 2-epimerase (Hydrolysis)                      |
| 4146   | 9866       | UAG4E        | UDP-N-acetylglucosamine 4-epimerase                                      |
| 4147   | 10650      | UAGALDP      | UDP-N-acetylgalactosamine diphosphorylase                                |
| 4148   | 476        | UAGDP        | UDP-N-acetylglucosamine diphosphorylase                                  |
| 4149   | 20329      | UDPACGALtl   | udpacgal intracellular transport                                         |
| 4150   | 7309       | UDPDLPT_L    | UDPglucose:dolichyl-phosphate beta-D-glucosyltransferase (liver)         |
| 4151   | 7310       | UDPDLPT_U    | UDPglucose:dolichyl-phosphate beta-D-glucosyltransferase (uterus)        |
| 4152   | 13426      | UDPG1P       | UDPglucuronate uridine-monophosphohydrolase                              |
| 4153   | 200        | UDPG4E       | UDPglucose 4-epimerase                                                   |
| 4154   | 12142      | UDPGALtg     | UDP-Gal Golgi transport via CMP antiport                                 |
| 4155   | 3196       | UDPGD        | UDPglucose 6-dehydrogenase                                               |
| 4156   | 12158      | UDPGLCAtcr   | UDPGlcA endoplasmic reticulum transport via UMP antiport                 |
| 4157   | 15034      | UDPGLCAtg    | UDPGlcA Golgi transport via UMP antiport                                 |
| 4158   | 15035      | UDPGLCter    | UDP-Glc endoplasmic reticulum transport via CMP antiport                 |
| 4159   | 12143      | UDPGLCtg     | UDP-Glc Golgi transport via CMP antiport                                 |
| 4160   | 13743      | UDPGLCDcg    | UDP-D-glucuronate decarboxylase, Golgi apparatus                         |
| 4161   | 10141      | UDPGNP       | UDPglucuronate uridine-diphosphohydrolase                                |
| 4162   | 10072      | UDPGP        | UDPglucose pyrophosphohydrolase                                          |
| 4163   | 15036      | UDPXYLter    | UDP-Xyl endoplasmic reticular transport via CMP antiport                 |
| 4164   | 13272      | UDPXYLtg     | UDP-Xyl Golgi transport via CMP antiport                                 |
| 4165   | 20330      | UDPtl        | udp intracellular transport                                              |
| 4166   | 9892       | UGALGTg      | UDPgalactose:D-glucose 4-beta-D-galactosyltransferase, Golgi apparatus   |
| 4167   | 12161      | UGALNACter   | UDP-GalNAc endoplasmic reticulum transport via CMP antiport              |
| 4168   | 12154      | UGALNACtg    | UDP-GalNAc Golgi transport via CMP antiport                              |
| 4169   | 11260      | UGCG         | Ceramide glucosyltransferase                                             |
| 4170   | 12157      | UGLCNACtg    | UDP-GlcNAc Golgi transport via CMP antiport                              |
| 4171   | 1171       | UGLT         | UDPglucose--hexose-1-phosphate uridylyltransferase                       |
| 4172   | 19785      | UGT1A10r     | UDP-glucuronosyltransferase 1-10 precursor, microsomal                   |
| 4173   | 11781      | UGT1A1r      | UDP-glucuronosyltransferase 1-10 precursor, microsomal                   |
| 4174   | 11784      | UGT1A2r      | UDP-glucuronosyltransferase 1-10 precursor, microsomal                   |
| 4175   | 11782      | UGT1A3r      | UDP-glucuronosyltransferase 1-10 precursor, microsomal                   |
| 4176   | 11785      | UGT1A4r      | UDP-glucuronosyltransferase 1-10 precursor, microsomal                   |
| 4177   | 11786      | UGT1A5r      | UDP-glucuronosyltransferase 1-10 precursor, microsomal                   |
| 4178   | 15118      | UGT1A5r2     | UDP-glucuronosyltransferase 1-10 precursor, microsomal (13-cis)          |
| 4179   | 11788      | UGT1A6r      | UDP-glucuronosyltransferase 1-10 precursor, microsomal                   |
| 4180   | 11789      | UGT1A7r      | UDP-glucuronosyltransferase 1-10 precursor, microsomal                   |
| 4181   | 11790      | UGT1A8r      | UDP-glucuronosyltransferase 1-10 precursor, microsomal                   |
| 4182   | 14981      | UGT1A9r      | UDP-glucuronosyltransferase 1-10 precursor, microsomal                   |
| 4183   | 2813       | UMPK         | UMP kinase                                                               |

| Column | Reaction # | Abbreviation | Reaction Name                                               |
|--------|------------|--------------|-------------------------------------------------------------|
| 4184   | 10235      | UMPK2        | UMP kinase (CTP)                                            |
| 4185   | 10234      | UMPK2n       | UMP kinase (CTP),nuclear                                    |
| 4186   | 10238      | UMPK3        | UMP kinase (UTP)                                            |
| 4187   | 10237      | UMPK3n       | UMP kinase (UTP),nuclear                                    |
| 4188   | 10239      | UMPK4        | UMP kinase (GTP)                                            |
| 4189   | 10240      | UMPK4n       | UMP kinase (GTP),nuclear                                    |
| 4190   | 10242      | UMPK5        | UMP kinase (dATP)                                           |
| 4191   | 10241      | UMPK5n       | UMP kinase (dATP),nuclear                                   |
| 4192   | 10245      | UMPK6        | UMP kinase (dCTP)                                           |
| 4193   | 10244      | UMPK6n       | UMP kinase (dCTP),nuclear                                   |
| 4194   | 10246      | UMPK7        | UMP kinase (dGTP)                                           |
| 4195   | 10247      | UMPK7n       | UMP kinase (dGTP),nuclear                                   |
| 4196   | 20307      | UMPKm        | UMP kinase (mitochondrial, ATP)                             |
| 4197   | 1446       | UMPKn        | UMP kinase, nuclear                                         |
| 4198   | 2921       | UNK2         | 2-keto-4-methylthiobutyrate transamination                  |
| 4199   | 3645       | UNK3         | 2-keto-4-methylthiobutyrate transamination                  |
| 4200   | 5          | UPP3S        | uroporphyrinogen-III synthase                               |
| 4201   | 6          | UPPDC1       | uroporphyrinogen decarboxylase (uroporphyrinogen III)       |
| 4202   | 9786       | UPPN         | b-ureidopropionase                                          |
| 4203   | 19376      | URATEt       | urate export from cytosol                                   |
| 4204   | 19375      | URATEtx      | urate export from peroxisome                                |
| 4205   | 12549      | URAt         | uracil transport via facilitated diffusion                  |
| 4206   | 2874       | URCN         | urocanase                                                   |
| 4207   | 2092       | UREAt        | Urea transport via facilitate diffusion                     |
| 4208   | 11966      | UREAt5       | urea, water cotransport                                     |
| 4209   | 14363      | UREAtm       | Urea transport via diffusion                                |
| 4210   | 20322      | URIDK2m      | uridylyate kinase (dUMP), mitochondrial                     |
| 4211   | 436        | URIK1        | uridine kinase (ATP:Uridine)                                |
| 4212   | 12553      | URIt         | uridine facilitated transport in cytosol                    |
| 4213   | 7884       | URIt4        | uridine transport in via sodium symport                     |
| 4214   | 12089      | URIt5        | uridine transport in via sodium symport (1:2)               |
| 4215   | 10282      | UROLACer     | uronolactonase, endoplasmic reticulum                       |
| 4216   | 14150      | UTPtn        | UTP diffusion in nucleus                                    |
| 4217   | 12570      | Uritl        | uridine facilitated transport from lysosome                 |
| 4218   | 12149      | Uritm        | uridine facilitated transport in mitochondria               |
| 4219   | 19531      | Uritn        | uridine transport in nucleus                                |
| 4220   | 19094      | VACCCPT1     | carnitine O-palmitoyltransferase                            |
| 4221   | 19113      | VACCCPT2     | carnitine transferase                                       |
| 4222   | 19075      | VACCCRNt     | transport into the mitochondria (carnitine)                 |
| 4223   | 12449      | VACCT        | fatty acid transport via diffusion                          |
| 4224   | 320        | VALTA        | valine transaminase                                         |
| 4225   | 3805       | VALTAm       | valine transaminase, mitochondrial                          |
| 4226   | 11954      | VALt4        | L-valine transport in via sodium symport                    |
| 4227   | 12593      | VALt5m       | Valine reversible mitochondrial transport                   |
| 4228   | 11926      | VALtec       | L-valine transport via diffusion (extracellular to cytosol) |
| 4229   | 11317      | VD3          | Vitamin D3 formation                                        |
| 4230   | 11326      | VITD2Hm      | Vitamin D-25-hydroxylase (D2)                               |
| 4231   | 11332      | VITD2t       | Vitamin D2 release                                          |
| 4232   | 11335      | VITD2tm      | Vitamin D2 transport from mitochondria                      |
| 4233   | 11323      | VITD3Hm      | Vitamin D-25-hydroxylase (D3)                               |
| 4234   | 11321      | VITD3t       | Vitamin D3 release                                          |
| 4235   | 20308      | VITD3t2      | Vitamin D3 uptake                                           |
| 4236   | 11336      | VITD3tm      | Vitamin D3 transport from mitochondria                      |
| 4237   | 20309      | VITD3tm3     | Vitamin D3 transport in mitochondria                        |
| 4238   | 13910      | VLCS2p       | Very-long-chain-fatty-acid-CoA ligase                       |
| 4239   | 13911      | VLCS2r       | Very-long-chain-fatty-acid-CoA ligase                       |

| Column | Reaction # | Abbreviation          | Reaction Name                                                               |
|--------|------------|-----------------------|-----------------------------------------------------------------------------|
| 4240   | 13901      | VLCSp                 | Very-long-chain-fatty-acid-CoA ligase                                       |
| 4241   | 13903      | VLCSr                 | Very-long-chain-fatty-acid-CoA ligase                                       |
| 4242   | 19720      | WHDDCAte              | xenobiotic transport                                                        |
| 4243   | 19721      | WHHDCate              | xenobiotic transport                                                        |
| 4244   | 20132      | WHTSTSTERONEte        | omega hydroxy testosterone transport                                        |
| 4245   | 19722      | WHTTDCAte             | xenobiotic transport                                                        |
| 4246   | 9843       | XANDp                 | xanthine dehydrogenase, peroxisomal                                         |
| 4247   | 14089      | XANtx                 | xanthine diffusion in peroxisome                                            |
| 4248   | 12077      | XAO2x                 | xanthine oxidase                                                            |
| 4249   | 12080      | XAOx                  | xanthine oxidase,peroxisomal                                                |
| 4250   | 19642      | XOL27OHtm             | 27 hydroxy cholesterol transport                                            |
| 4251   | 14181      | XOL7AH2tm             | lipid, flip-flop intracellular transport                                    |
| 4252   | 14182      | XOL7AH2tr             | lipid, flip-flop intracellular transport                                    |
| 4253   | 14180      | XOL7AONEtr            | lipid, flip-flop intracellular transport                                    |
| 4254   | 12681      | XOLDIOLONEt           | lipid, flip-flop intracellular transport                                    |
| 4255   | 14177      | XOLDIOLONEtm          | lipid, flip-flop intracellular transport                                    |
| 4256   | 14714      | XOLEST2te             | cholesterol ester transporter                                               |
| 4257   | 14713      | XOLESTte              | cholesterol ester transporter                                               |
| 4258   | 19643      | XOLTRI24tc            | 24 trihydroxy cholesterol transport                                         |
| 4259   | 19644      | XOLTRI24te            | 24 trihydroxy cholesterol transport                                         |
| 4260   | 19645      | XOLTRI25tc            | 25 trihydroxy cholesterol transport                                         |
| 4261   | 19646      | XOLTRI25te            | 25 trihydroxy cholesterol transport                                         |
| 4262   | 19647      | XOLTRI27tc            | 27 trihydroxy cholesterol transport                                         |
| 4263   | 19648      | XOLTRI27te            | 27 trihydroxy cholesterol transport                                         |
| 4264   | 14179      | XOLTRIOLtm            | lipid, flip-flop intracellular transport                                    |
| 4265   | 14178      | XOLTRIOLtr            | lipid, flip-flop intracellular transport                                    |
| 4266   | 14927      | XSERTg                | Xyl-L-Ser (protein) transport from endoplasmic reticulum to Golgi apparatus |
| 4267   | 254        | XYLK                  | xylulokinase                                                                |
| 4268   | 10156      | XYLTD_Dr              | xylitol dehydrogenase (D-xyulose-forming)                                   |
| 4269   | 11551      | XYLTer                | UDP-xylose:protein xylosyltransferase, endoplasmic reticulum                |
| 4270   | 2052       | XYLTt                 | Xylitol transport via passive diffusion                                     |
| 4271   | 10155      | XYLUR                 | xylulose reductase                                                          |
| 4272   | 1556       | XYLt                  | D-xylose reversible transport                                               |
| 4273   | 14922      | XYLtly                | Xylose efflux from lysosome                                                 |
| 4274   | 11412      | YVITEt                | gamma-Tocopherol (Vit. E) transport                                         |
| 4275   | 14773      | biomass_mm_1_no_glygl | Mouse Biomass 1 (no glycogen)                                               |
