# Supplementary material
Source: PubMed Central journal article supplement (PMC1794290)
Supplement: pnas_0610772104_10.pdf [file pnas_0610772104_10.pdf]

**Table 5: *H. sapiens* Recon 1 intrasystem reactions.** Metabolic and intrasystem transport reactions are listed alphabetically by reaction abbreviation. Compartmentalization is denoted by the following abbreviations. Reactions that occur entirely within one compartment have abbreviations at the beginning of the equation; otherwise, abbreviations follow each metabolite.

Compartment Abbreviations

|                      |                            |
|----------------------|----------------------------|
| [c], cytoplasm       | [m], mitochondrion         |
| [e], extracellular   | [n], nucleus               |
| [g], Golgi apparatus | [r], endoplasmic reticulum |
| [l], lysosome        | [x], peroxisome            |

E.C. #, Enzyme Commission numbers; Gene association, Boolean logic statement describing relationship between loci and reactions.

| Abbreviation    | Reaction Name                                                                                     | Reaction                                                         | E.C. #   | Pathway                                   | Gene association                                                                                                     |
|-----------------|---------------------------------------------------------------------------------------------------|------------------------------------------------------------------|----------|-------------------------------------------|----------------------------------------------------------------------------------------------------------------------|
| 10FTH5GLUtl     | 5-glutamyl-10FTHF transport, lysosomal                                                            | 10fhf5glu[c] --> 10fhf5glu[l]                                    |          | Transport, Lysosomal                      |                                                                                                                      |
| 10FTH5GLUm      | 5-glutamyl-10FTHF transport, mitochondrial                                                        | 10fhf5glu[m] --> 10fhf5glu[c]                                    |          | Transport, Mitochondrial                  |                                                                                                                      |
| 10FTH6GLUtl     | 6-glutamyl-10FTHF transport, lysosomal                                                            | 10fhf6glu[c] --> 10fhf6glu[l]                                    |          | Transport, Lysosomal                      |                                                                                                                      |
| 10FTH6GLUm      | 6-glutamyl-10FTHF transport, mitochondrial                                                        | 10fhf6glu[m] --> 10fhf6glu[c]                                    |          | Transport, Mitochondrial                  |                                                                                                                      |
| 10FTH7GLUtl     | 7-glutamyl-10FTHF transport, lysosomal                                                            | 10fhf7glu[c] --> 10fhf7glu[l]                                    |          | Transport, Lysosomal                      |                                                                                                                      |
| 10FTH7GLUm      | 7-glutamyl-10FTHF transport, mitochondrial                                                        | 10fhf7glu[m] --> 10fhf7glu[c]                                    |          | Transport, Mitochondrial                  |                                                                                                                      |
| 10FTHFtl        | 10-Formyltetrahydrofolate lysosomal transport via diffusion                                       | 10fhf[c] <=> 10fhf[l]                                            |          | Transport, Lysosomal                      |                                                                                                                      |
| 10FTHFm         | 10-Formyltetrahydrofolate mitochondrial transport via diffusion                                   | 10fhf[c] <=> 10fhf[m]                                            |          | Transport, Mitochondrial                  |                                                                                                                      |
| 11DOCRTSLm      | 11-deoxycortisol intracellular transport                                                          | 11doctsl[c] <=> 11doctsl[m]                                      |          | Transport, Mitochondrial                  |                                                                                                                      |
| 11DOCRTSLr      | 11-deoxycortisol intracellular transport                                                          | 11doctsl[c] <=> 11doctsl[r]                                      |          | Transport, Endoplasmic Reticular          |                                                                                                                      |
| 11DOCRTSTRNm    | 11-deoxycorticosterone intracellular transport                                                    | 11doctrstr[c] <=> 11doctrstr[m]                                  |          | Transport, Mitochondrial                  |                                                                                                                      |
| 11DOCRTSTRNr    | 11-deoxycorticosterone intracellular transport                                                    | 11doctrstr[c] <=> 11doctrstr[r]                                  |          | Transport, Endoplasmic Reticular          |                                                                                                                      |
| 13DAMPPOX       | 1,3-Diaminopropane: oxygen oxidoreductase (deaminating)                                           | [c]: 13damp + h2o + o2 --> bampald + h2o2 + nb4                  | 1.4.3.6  | beta-Alanine metabolism                   | ( 26.1 or 314.1 or 314.2 or 8639.1 )                                                                                 |
| 1a,24,25VITD2Hm | 1-alpha-Vitamin D-24,25-hydroxylase (D2)                                                          | [m]: 2425dhvid2 + h + nadph + o2 --> 1a2425dhvid2 + h2o + nadp   |          | Vitamin D                                 |                                                                                                                      |
| 1a,24,25VITD3Hm | 1-alpha-Vitamin D-24,25-hydroxylase (D3)                                                          | [m]: 2425dhvid3 + h + nadph + o2 --> 1a2425dhvid3 + h2o + nadp   |          | Vitamin D                                 |                                                                                                                      |
| 1a,25VITD2Hm    | 1-alpha,24R,25-Vitamin D-hydroxylase (D2)                                                         | [m]: 1a25dhvid2 + h + nadph + o2 --> 1a2425dhvid2 + h2o + nadp   |          | Vitamin D                                 |                                                                                                                      |
| 1a,25VITD3Hm    | 1-alpha,24R,25-Vitamin D-hydroxylase (D3)                                                         | [m]: 1a25dhvid3 + h + nadph + o2 --> 1a2425dhvid3 + h2o + nadp   |          | Vitamin D                                 |                                                                                                                      |
| 1MNCAMtl        | N1-Methylnicotinamide transport                                                                   | 1mncam[c] + atp[c] + h2o[c] --> 1mncam[c] + adp[c] + h[c] + p[c] |          | Transport, Extracellular                  |                                                                                                                      |
| 1PPDCRp         | delta1-piperidine-2-carboxylate reductase, peroxisomal                                            | [x]: 1pipdn2c + h + nadh --> Lpipedol + nad                      |          | Lysine Metabolism                         |                                                                                                                      |
| 24,25DHVITD2tl  | 24,25-Dihydroxyvitamin D2 transport from cytoplasm                                                | 2425dhvid2[c] --> 2425dhvid2[e]                                  |          | Transport, Extracellular                  |                                                                                                                      |
| 24,25DHVITD2tm  | 24,25-Dihydroxyvitamin D2 transport from mitochondria                                             | 2425dhvid2[m] --> 2425dhvid2[c]                                  |          | Transport, Mitochondrial                  |                                                                                                                      |
| 24,25DHVITD3tl  | 24,25-Dihydroxyvitamin D3 transport from cytoplasm                                                | 2425dhvid3[c] --> 2425dhvid3[e]                                  |          | Transport, Extracellular                  |                                                                                                                      |
| 24,25DHVITD3tm  | 24,25-Dihydroxyvitamin D3 transport from mitochondria                                             | 2425dhvid3[m] --> 2425dhvid3[c]                                  |          | Transport, Mitochondrial                  |                                                                                                                      |
| 24,25VITD2Hm    | 24R-Vitamin D-25-hydroxylase (D2)                                                                 | [m]: 25hvuid2 + h + nadph + o2 --> 2425dhvid2 + h2o + nadp       |          | Vitamin D                                 | 1591.1                                                                                                               |
| 24,25VITD3Hm    | 24R-Vitamin D-25-hydroxylase (D3)                                                                 | [m]: 25hvuid3 + h + nadph + o2 --> 2425dhvid3 + h2o + nadp       |          | Vitamin D                                 | 1591.1                                                                                                               |
| 24NPHe          | xenobiotic transport                                                                              | 24nph[e] <=> 24nph[c]                                            |          | Transport, Extracellular                  |                                                                                                                      |
| 25HVITD2tl      | 25-hydroxyvitamin D2 transport from cytoplasm                                                     | 25hvuid2[c] --> 25hvuid2[e]                                      |          | Transport, Extracellular                  |                                                                                                                      |
| 25HVITD2in      | 25-hydroxyvitamin D2 transport in cytoplasm                                                       | 25hvuid2[e] --> 25hvuid2[c]                                      |          | Transport, Extracellular                  |                                                                                                                      |
| 25HVITD2in-m    | 25-hydroxyvitamin D2 transport in mitochondria                                                    | 25hvuid2[c] --> 25hvuid2[m]                                      |          | Transport, Mitochondrial                  |                                                                                                                      |
| 25HVITD2m       | 25-hydroxyvitamin D2 transport from mitochondria                                                  | 25hvuid2[m] --> 25hvuid2[c]                                      |          | Transport, Mitochondrial                  |                                                                                                                      |
| 25HVITD3tl      | 25-hydroxyvitamin D3 transport from cytoplasm                                                     | 25hvuid3[c] --> 25hvuid3[e]                                      |          | Transport, Extracellular                  |                                                                                                                      |
| 25HVITD3in      | 25-hydroxyvitamin D3 transport in cytoplasm                                                       | 25hvuid3[e] --> 25hvuid3[c]                                      |          | Transport, Extracellular                  |                                                                                                                      |
| 25HVITD3in-m    | 25-hydroxyvitamin D3 transport in mitochondria                                                    | 25hvuid3[c] --> 25hvuid3[m]                                      |          | Transport, Mitochondrial                  |                                                                                                                      |
| 25HVITD3m       | 25-hydroxyvitamin D3 transport from mitochondria                                                  | 25hvuid3[m] --> 25hvuid3[c]                                      |          | Transport, Mitochondrial                  |                                                                                                                      |
| 25VITD2Hm       | 1-alpha-Vitamin D-25-hydroxylase (D2)                                                             | [m]: 25hvuid2 + h + nadph + o2 --> 1a25dhvid2 + h2o + nadp       |          | Vitamin D                                 | 1594.1                                                                                                               |
| 25VITD3Hm       | 1-alpha-Vitamin D-25-hydroxylase (D3)                                                             | [m]: 25hvuid3 + h + nadph + o2 --> 1a25dhvid3 + h2o + nadp       |          | Vitamin D                                 | 1594.1                                                                                                               |
| 2AMACHYD        | 2-Aminoacrylate hydrolysis                                                                        | [c]: 2amac + h2o --> nb4 + pyr                                   |          | Glycine, Serine, and Threonine Metabolism |                                                                                                                      |
| 2AMACSULT       | 2-Aminoacrylate sulfotransferase                                                                  | [c]: 2amac + nadph + paps --> Lcyst + nadp + pap                 |          | Cysteine Metabolism                       |                                                                                                                      |
| 2AMADPTm        | L-2-aminoadipate shuttle (cytosol/mitochondria)                                                   | L2aadp[c] + akgl[m] <=> L2aadp[m] + akgl[c]                      |          | Lysine Metabolism                         | 89874.1                                                                                                              |
| 2DR1PP          | 2-deoxy-D-ribose 1-phosphate phosphorylase                                                        | [c]: 2dr1p + h2o --> drib + pi                                   | 3.1.3.10 | Pyrimidine Catabolism                     |                                                                                                                      |
| 2HBO            | 2-Hydroxybutyrate:NAD+ oxidoreductase                                                             | [c]: 2hb + nad <=> 2obut + h + nadh                              | 1.1.1.27 | Propanoate Metabolism                     | ( ( 3945.1 and 3939.1 ) or 3945.1 or 3939.1 or 55293.1 or 3948.1 or 3948.2 or 160287.1 or 92483.1 )                  |
| 2HBt2           | 2-hydroxybutyrate cotransport with proton                                                         | 2hb[e] + h[e] <=> 2hb[c] + h[c]                                  |          | Transport, Extracellular                  | ( 6566.1 or 9194.1 or 9123.1 )                                                                                       |
| 2HCO3_Nat       | bicarbonate transport (Na/HCO3 1:2 cotransport)                                                   | (2) hco3[e] + na[l]e <=> hco3[c] + na[l]c                        |          | Transport, Extracellular                  | ( 8671.1 or 57835.1 or 57835.2 or 57835.3 or 57835.4 )                                                               |
| 2MCI1t          | 2-methylcitrate transport via diffusion                                                           | 2mci1[c] <=> 2mci1[e]                                            |          | Transport, Extracellular                  |                                                                                                                      |
| 2OXOADOXm       | 2-Oxoadipate:lipamide 2-oxidoreductase(decarboxylating and acceptor-succinylating) (mitochondria) | [m]: 2oxoadp + coa + nad --> co2 + glutcoa + nadh                | 1.2.4.2  | Lysine Metabolism                         | ( ( 4967.1 and ( 8050.1 and 1738.1 ) ) and 1743.1 ) or ( 1743.1 and 4967.2 and ( 8050.1 and 1738.1 ) ) )             |
| 2OXOADPTm       | 2-oxoadipate shuttle (cytosol/mitochondria)                                                       | 2oxoadp[c] + akgl[m] <=> 2oxoadp[m] + akgl[c]                    |          | Tryptophan metabolism                     | 89874.1                                                                                                              |
| 34DHOXPEGOX     | 3,4-Dihydroxyphenylethylenglycol:NAD+ oxidoreductase                                              | [c]: 34dhmald + h + nadh <=> 34dhoxpeg + nad                     | 1.1.1.1  | Tyrosine metabolism                       | ( 131.1 or 13782.1 or ( 124.1 and 126.1 ) or ( 124.1 and 125.1 ) or ( 126.1 and 125.1 ) or 127.1 or 128.1 or 130.1 ) |
| 34DHOXPEGt      | 3,4-Dihydroxyphenylethylenglycol transport (diffusion)                                            | 34dhoxpeg[c] <=> 34dhoxpeg[e]                                    |          | Transport, Extracellular                  |                                                                                                                      |
| 34DHPHAMT       | 3,4-Dihydroxyphenylacetate:amet O-methyltransferase                                               | [c]: 34dhpha + amet --> ahcys + h + homoval                      | 2.1.1.6  | Tyrosine metabolism                       | ( 1312.1 or 1312.2 )                                                                                                 |

| Abbreviation         | Reaction Name                                                                                                 | Reaction                                                    | E.C. #     | Pathway                                    | Gene association                                       |
|----------------------|---------------------------------------------------------------------------------------------------------------|-------------------------------------------------------------|------------|--------------------------------------------|--------------------------------------------------------|
| 34DHPHEt             | 3,4-Dihydroxy-L-phenylalanine transport                                                                       | 34dhphe[e] <=> 34dhphe[c]                                   |            | Transport, Extracellular                   | 117247.1                                               |
| 34DHPLACOX           | 3,4-Dihydroxyphenylacetaldehyde:NAD+ oxidoreductase                                                           | [e]: 34dhpac + h2o + nad -> 34dpha + (2) h + nadh           | 1.2.1.5    | Tyrosine metabolism                        | (222.1 or 221.1 or 220.1 or 218.1)                     |
| 34DHPLACOX(NADP)     | 3,4-Dihydroxyphenylacetaldehyde:NADP+ oxidoreductase                                                          | [e]: 34dhpac + h2o + nadp <=> 34dpha + (2) h + nadph        | 1.2.1.5    | Tyrosine metabolism                        | (222.1 or 218.1 or 221.1)                              |
| 34DHXMANDACOX        | 3,4-Dihydroxymandelaldehyde:NAD+ oxidoreductase                                                               | [e]: 34dhmal + h2o + nad -> 34dhxmand + (2) h + nadh        | 1.2.1.5    | Tyrosine metabolism                        | (221.1 or 220.1 or 218.1)                              |
| 34DHXMANDACOX(NADP)  | 3,4-Dihydroxymandelaldehyde:NADP+ oxidoreductase                                                              | [e]: 34dhmal + h2o + nadp <=> 34dhxmand + (2) h + nadph     | 1.2.1.5    | Tyrosine metabolism                        | (221.1 or 222.1)                                       |
| 34HPLFM              | 3-(4-hydroxyphenyl)-lactate formation                                                                         | [m]: 34hpp + h + nadh -> 34hpl + nad                        |            | Ubiquinone Biosynthesis                    |                                                        |
| 34HPPOR              | 4-Hydroxyphenylpyruvate:oxygen oxidoreductase                                                                 | [e]: 34hpp + o2 -> co2 + hgentis                            | 1.13.11.27 | Tyrosine metabolism                        | 3242.1                                                 |
| 35CGMPn              | 35cGMP nuclear transport                                                                                      | 35cgmp[c] <=> 35cgmp[n]                                     |            | Transport, Nuclear                         |                                                        |
| 3AIBt                | 3-amino-isobutyrate transport                                                                                 | 3aib[c] -> 3aib[e]                                          |            | Transport, Extracellular                   |                                                        |
| 3AIBtm               | L-3-aminoisobutyrate transaminase, mitochondrial                                                              | [m]: 2mop + glu-L <=> 3aib + akG                            | 2.6.1.22   | Valine, Leucine, and Isoleucine Metabolism | (18.1 or 18.2)                                         |
| 3AIBm                | 3-amino-isobutyrate transport, mitochondrial                                                                  | 3aib[m] -> 3aib[c]                                          |            | Transport, Mitochondrial                   | (18.1 or 18.2)                                         |
| 3DPHBI               | Hydroxylation of 3-Decaprenyl-4-hydroxybenzoate (NADH)                                                        | [m]: 3dphb + h + nadh + o2 -> 3dpdhh + h2o + nad            |            | Ubiquinone Biosynthesis                    |                                                        |
| 3DPHBI2              | Hydroxylation of 3-Decaprenyl-4-hydroxybenzoate (NADPH)                                                       | [m]: 3dphb + h + nadph + o2 -> 3dpdhh + h2o + nadp          |            | Ubiquinone Biosynthesis                    |                                                        |
| 3DSPHR               | 3-Dehydrospinganine reductase                                                                                 | [e]: 3dspgn + h + nadph -> nadp + sphgn                     | 1.1.1.102  | Sphingolipid Metabolism                    | 2531.1                                                 |
| 3HAO                 | 3-hydroxyanthranilate 3,4-dioxygenase                                                                         | [e]: 3hanthm + o2 -> crmsa + h                              | 1.13.11.6  | Tryptophan metabolism                      | 23498.1                                                |
| 3HBCdm               | 3-hydroxybutyryl-CoA dehydratase, mitochondrial                                                               | [m]: h2coa + h2o <=> 3hcoa-R                                | 4.2.1.55   | Butanoate Metabolism                       | 55268.1                                                |
| 3HBCOAhLm            | 3-hydroxyisobutyryl-CoA hydrolase, mitochondrial                                                              | [m]: 3hibutcoa + h2o -> 3hmp + coa + h                      | 3.1.2.4    | Valine, Leucine, and Isoleucine Metabolism |                                                        |
| 3HCO3_NaI            | bicarbonate transport (Na/HCO3 1:3 cotransport)                                                               | (3) hco3[e] + naI[e] <=> (3) hco3[c] + naI[c]               |            | Transport, Extracellular                   | (8671.1 or 57835.1 or 57835.2 or 57835.3 or 57835.4)   |
| 3HKYNAGKAT           | 3-Hydroxy-L-kynurenine:2-oxoglutarate aminotransferase                                                        | [e]: akG + hLkynr -> 42A3HP24DB + glu-L                     | 2.6.1.7    | Tryptophan metabolism                      | (51166.1 or 51166.2 or 883.1)                          |
| 3HLTYCL              | 3-Hydroxy-L-tyrosine carboxy-lyase                                                                            | [e]: 34dhphe + h -> co2 + dopa                              | 4.1.1.28   | Tyrosine metabolism                        | 1644.1                                                 |
| 3HPCOAHYD            | 3-hydroxyisobutyryl-Coenzyme A hydrolase                                                                      | [e]: 3hpcoa + h2o -> 3hpp + coa + h                         | 3.1.2.4    | beta-Alanine metabolism                    | (26275.1 or 26275.2)                                   |
| 3HPPD                | 3-hydroxypropionate dehydrogenase                                                                             | [e]: 3hpp + nad <=> h + msa + nadh                          | 1.1.1.59   | Propanoate Metabolism                      |                                                        |
| 3HXKYNDCL            | 3-Hydroxykynurenine decarboxy-lyase                                                                           | [e]: h + hLkynr -> 3hxkynam + co2                           | 4.1.1      | Tryptophan metabolism                      | 1644.1                                                 |
| 3HXKYNEXDA           | 3-Hydroxykynurenine:oxygen oxidoreductase(deaminating)(flavin-containing)                                     | [e]: 3hxkynam + o2 -> 48dhoxqin + h2o2 + nh4                | 1.4.3.4    | Tryptophan metabolism                      | (4128.1 or 4129.1)                                     |
| 3M4HDXPAC            | 3-Methoxy-4-hydroxyphenylacetaldehyde:NAD+ oxidoreductase                                                     | [e]: 3mox4hpac + h2o + nad <=> (2) h + homoal + nadh        | 1.2.1.5    | Tyrosine metabolism                        | (221.1 or 220.1 or 222.1 or 218.1)                     |
| 3MLDAI               | 3MLDA extracellular transport via diffusion                                                                   | 3mlda[c] <=> 3mlda[e]                                       |            | Transport, Extracellular                   |                                                        |
| 3MOB2im              | 3-methyl-2-oxobutanoate mitochondrial transport via proton symport                                            | 3mob[c] + h[c] -> 3mob[m] + h[m]                            |            | Transport, Mitochondrial                   |                                                        |
| 3MOP2im              | 3-Methyl-2-oxopentanoate mitochondrial transport via proton symport                                           | 3mop[c] + h[c] -> 3mop[m] + h[m]                            |            | Transport, Mitochondrial                   |                                                        |
| 3MOX4HOXPALDOX       | 3-Methoxy-4-hydroxyphenylglycolaldehyde:NAD+ oxidoreductase                                                   | [e]: 3m4hpga + h2o + nad -> 3mox4hoxm + (2) h + nadh        | 1.2.1.5    | Tyrosine metabolism                        | (220.1 or 218.1 or 221.1 or 222.1)                     |
| 3MOX4HOXPALDOX(NADP) | 3-Methoxy-4-hydroxyphenylglycolaldehyde:NADP+ oxidoreductase                                                  | [e]: 3m4hpga + h2o + nadp <=> 3mox4hoxm + (2) h + nadph     | 1.2.1.5    | Tyrosine metabolism                        | (220.1 or 218.1 or 221.1 or 222.1)                     |
| 3MOXTYROX            | 3-Methoxytyramine:oxygen oxidoreductase (deaminating)                                                         | [e]: 3moxtyr + h2o + o2 -> 3mox4hpac + h2o2 + nh4           | 1.4.3.4    | Tyrosine metabolism                        | (4128.1 or 4129.1)                                     |
| 3NTD7I               | 3'-nucleotidase (AMP), lysosome                                                                               | [l]: 3amp + h2o -> adn + pi                                 |            | Nucleic acid degradation                   | 53.1                                                   |
| 3SALAASpm            | cysteinesulfinate-aspartate mitochondrial shuttle                                                             | 3sala[m] + asp-L[c] <=> 3sala[c] + asp-L[m]                 |            | Transport, Mitochondrial                   | (10165.1 or 8604.1)                                    |
| 3SALACBOXL           | 3-Sulfino-L-alanine carboxy-lyase                                                                             | [e]: 3sala + h -> co2 + hpytaur                             | 4.1.1.15   | Taurine and hypotaurine metabolism         | (2571.1 or 2571.2 or 2572.1 or 51380.1)                |
| 3SALAOX              | cysteinesulfenic acid oxidase                                                                                 | [e]: (2) 3sala + (2) h + o2 -> (2) Lcyst                    |            | Taurine and hypotaurine metabolism         |                                                        |
| 3SALATAi             | 3-sulfino-alanine transaminase (irreversible)                                                                 | [e]: 3sala + akG + h -> 3snpyr + glu-L                      |            | Cysteine Metabolism                        | 2805.1                                                 |
| 3SALATAim            | 3-sulfino-alanine transaminase (irreversible), mitochondrial                                                  | [m]: 3sala + akG + h -> 3snpyr + glu-L                      |            | Cysteine Metabolism                        | 2806.1                                                 |
| 3SPYRSP              | 3-sulfinopyruvate hydrolase (spontaneous reaction)                                                            | [e]: 3snpyr + h2o -> h + pyr + so3                          |            | Cysteine Metabolism                        |                                                        |
| 3SPYRSPm             | 3-sulfinopyruvate hydrolase (spontaneous reaction), mitochondrial                                             | [m]: 3snpyr + h2o -> h + pyr + so3                          |            | Cysteine Metabolism                        |                                                        |
| 41R1H2MAE12BOOX      | 4-[(1R)-1-Hydroxy-2-(methylamino)ethyl]-1,2-benzenediol:oxygen oxidoreductase(deaminating)(flavin-containing) | [e]: adml + h2o + o2 -> 34dhmal + h2o2 + mma                | 1.4.3.4    | Tyrosine metabolism                        | (4128.1 or 4129.1)                                     |
| 41R2A1H12BOOX        | 4-[(1R)-2-Amino-1-hydroxyethyl]-1,2-benzenediol:oxygen oxidoreductase(deaminating)(flavin-containing)         | [e]: h2o + nrpphr + o2 -> 34dhmal + h2o2 + nh4              | 1.4.3.4    | Tyrosine metabolism                        | (4128.1 or 4129.1)                                     |
| 42A12BOOX            | 4-(2-Aminoethyl)-1,2-benzenediol:oxygen oxidoreductase(deaminating)(flavin-containing)                        | [e]: dopa + h2o + o2 -> 34dhpac + h2o2 + nh4                | 1.4.3.6    | Tyrosine metabolism                        | (26.1 or 314.1 or 314.2 or 8639.1 or 4128.1 or 4129.1) |
| 4ABUTm               | 4-aminobutanoate mitochondrial transport via diffusion                                                        | 4abut[c] <=> 4abut[m]                                       |            | Transport, Mitochondrial                   |                                                        |
| 4HBZCOAFm            | 4-hydroxybenzoyl-CoA formation                                                                                | [m]: coa + coucoa + h2o + nad -> 4hbzcoa + accoa + h + nadh |            | Ubiquinone Biosynthesis                    |                                                        |
| 4HBZfm               | 4-hydroxybenzoate formation                                                                                   | [m]: 4hbzcoa + h2o -> 4hbz + coa + h                        |            | Ubiquinone Biosynthesis                    |                                                        |
| 4HDEBRISOQUINEt      | xenobiotic transport                                                                                          | 4hdebrisoquine[e] <=> 4hdebrisoquine[c]                     |            | Transport, Extracellular                   |                                                        |
| 4HGLSDm              | L-4-hydroxyglutamate semialdehyde dehydrogenase, mitochondrial                                                | [m]: 4hglsa + h2o + nad <=> e4hglu + (2) h + nadh           | 1.5.1.12   | Arginine and Proline Metabolism            | (8659.1 or 8659.2)                                     |
| 4HOXPACDOX(NADP)     | 4-Hydroxyphenylacetaldehyde:NADP+ oxidoreductase                                                              | [e]: 4hoxpac + h2o + nadp <=> 4hpac + (2) h + nadph         | 1.2.1.5    | Tyrosine metabolism                        | (220.1 or 218.1 or 221.1 or 222.1)                     |
| 4MOP2im              | 4-methyl-2-oxopentanoate mitochondrial transport via proton symport                                           | 4mop[c] + h[c] -> 4mop[m] + h[m]                            |            | Transport, Mitochondrial                   |                                                        |
| 4MTOLBUTAMIDEt       | xenobiotic transport                                                                                          | 4mtolbutamide[e] <=> 4mtolbutamide[c]                       |            | Transport, Extracellular                   |                                                        |
| 4NPHSFe              | xenobiotic transport                                                                                          | 4nphs[e] <=> 4nphs[c]                                       |            | Transport, Extracellular                   |                                                        |

| Abbreviation       | Reaction Name                                                                                                                | Reaction                                                                                    | E.C. #     | Pathway                                   | Gene association                                                                                     |
|--------------------|------------------------------------------------------------------------------------------------------------------------------|---------------------------------------------------------------------------------------------|------------|-------------------------------------------|------------------------------------------------------------------------------------------------------|
| 4NPHSULT           | 4-Nitrophenol Sulfotransferase                                                                                               | [c] : 4nph + paps --> 4nphsf + h + pap                                                      | 2.8.2.1    | CYP Metabolism                            | ( 6817.1 or 6817.2 or 6817.3 or 6817.4 or 6817.5 or 6799.1 or 6799.2 or 6818.1 or 6818.2 or 6818.3 ) |
| 4NPHte             | xenobiotic transport                                                                                                         | 4nph[e] <=> 4nph[c]                                                                         |            | Transport, Extracellular                  |                                                                                                      |
| 4PYRDX             | 4-Pyridoxal secretion                                                                                                        | 4pyrdx[c] + atp[c] + h2o[c] --> 4pyrdx[e] + adp[c] + h[c] + pi[c]                           |            | Transport, Extracellular                  |                                                                                                      |
| 5ADTSTSTERONEGLCte | glucuronidated compound transport                                                                                            | 5adtststeroneglc[c] + atp[c] + h2o[c] --> 5adtststeroneglc[e] + adp[c] + h[c] + pi[c]       |            | Transport, Extracellular                  | 4363.1                                                                                               |
| 5ADTSTSTERONEGLCtr | glucuronidated compound transport                                                                                            | 5adtststeroneglc[c] <=> 5adtststeroneglc[r]                                                 |            | Transport, Endoplasmic Reticular          |                                                                                                      |
| 5ADTSTSTERONESte   | sulfonated testosterone transport                                                                                            | 5adtststerone[s] <=> 5adtststerone[e]                                                       |            | Transport, Extracellular                  |                                                                                                      |
| 5ADTSTSTERONESULT  | 5alpha-Dihydrotestosterone sulfotransferase                                                                                  | [c] : 5adtststerone + paps --> 5adtststerone[s] + h + pap                                   | 2.8.2.2    | Steroid Metabolism                        | 6822.1                                                                                               |
| 5ADTSTSTERONEte    | 5 alpha dihydrotestosterone transport                                                                                        | 5adtststerone[c] <=> 5adtststerone[e]                                                       |            | Transport, Extracellular                  |                                                                                                      |
| 5ADTSTSTERONEtr    | 5 alpha dihydrotestosterone intracellular transport                                                                          | 5adtststerone[r] <=> 5adtststerone[c]                                                       |            | Transport, Endoplasmic Reticular          |                                                                                                      |
| 5AOPtm             | 5-Aminolevulinat mitochondrial transport                                                                                     | 5aop[c] <=> 5aop[m]                                                                         |            | Heme Biosynthesis                         |                                                                                                      |
| 5DHFtl             | 5-glutamyl-DHF transport, lysosomal                                                                                          | 5dhf[c] --> 5dhf[l]                                                                         |            | Transport, Lysosomal                      |                                                                                                      |
| 5FTHF2             | 5-formyltetrahydrofolate transport via anion exchange                                                                        | 5fthf[e] + oh1[c] <=> 5fthf[c] + oh1[e]                                                     |            | Transport, Extracellular                  | ( 6573.1 or 6573.2 )                                                                                 |
| 5HLDL              | 5-Hydroxy-L-tryptophan decarboxy-lyase                                                                                       | [c] : 5htrp + h --> co2 + srtn                                                              | 4.1.1.28   | Tryptophan metabolism                     | 1644.1                                                                                               |
| 5HOMEPRAZOLEte     | xenobiotic transport                                                                                                         | 5homeprazole[c] <=> 5homeprazole[e]                                                         |            | Transport, Extracellular                  |                                                                                                      |
| 5HOXINDACTO2OX     | 5-Hydroxyindoleacetaldehyde:oxygen oxidoreductase                                                                            | [c] : 5shoxindact + h2o + o2 --> 5shoxindoa + h + h2o2                                      | 1.2.3.1    | Tryptophan metabolism                     | 316.1                                                                                                |
| 5HOXINDACTOX       | 5-Hydroxyindoleacetaldehyde:NAD+ oxidoreductase                                                                              | [c] : 5shoxindact + h2o + nad --> 5shoxindoa + (2) h + nadh                                 | 1.2.1.3    | Tryptophan metabolism                     | ( 216.1 or 8854.1 or 8854.2 or 8854.3 or 224.1 or 501.1 or 223.1 )                                   |
| 5HOXINDACTOXm      | 5-Hydroxyindoleacetaldehyde:NAD+ oxidoreductase (mito)                                                                       | [m] : 5shoxindact + h2o + nad --> 5shoxindoa + (2) h + nadh                                 | 1.2.1.3    | Tryptophan metabolism                     | ( 219.1 or 217.1 or 8659.1 or 8659.2 )                                                               |
| 5HOXINOXA          | 5-Hydroxytryptamine:oxygen oxidoreductase(deaminating)(flavin-containing)                                                    | [c] : h2o + o2 + srtn --> 5shoxindact + h2o2 + nh4                                          | 1.4.3.4    | Tryptophan metabolism                     | ( 4128.1 or 4129.1 )                                                                                 |
| 5HTRPDOX           | 5-Hydroxy-L-tryptophan:oxygen 2,3-dioxygenase (indole-decyclizing)                                                           | [c] : 5htrp + o2 --> 5shoxnfyln                                                             | 1.13.11.42 | Tryptophan metabolism                     | 3620.1                                                                                               |
| 5HTRPVESSEC        | 5-hydroxy-L-tryptophan secretion via secretory vesicle (ATP driven)                                                          | (3) 5htrp[c] + (2) atp[c] + (2) h2o[c] --> (3) 5htrp[e] + (2) adp[c] + (2) h[c] + (2) pi[c] |            | Transport, Extracellular                  | ( 6570.1 or 6571.1 )                                                                                 |
| 5HXKYNDCL          | 5-Hydroxykynurenamine decarboxy-lyase                                                                                        | [c] : 5hskyn + h --> 5hskynam + co2                                                         | 4.1.1.28   | Tryptophan metabolism                     | 1644.1                                                                                               |
| 5HXKYNOXA          | 5-Hydroxykynurenamine:oxygen oxidoreductase(deaminating)(flavin-containing)                                                  | [c] : 5hskynam + o2 --> 46dhoqxuin + h2o2 + nh4                                             | 1.4.3.4    | Tryptophan metabolism                     | ( 4128.1 or 4129.1 )                                                                                 |
| 5MTHFt             | 5-Methyltetrahydrofolate transport via receptor binding and protolysis                                                       | 5mthf[e] <=> 5mthf[c]                                                                       |            | Transport, Extracellular                  | ( 2348.1 or 2348.2 or 2348.3 or 2348.4 or 2348.5 or 2348.6 or 2351.1 or 2352.1 )                     |
| 5MTHF2             | 5-methyltetrahydrofolate transport via anion exchange                                                                        | 5mthf[e] + oh1[c] <=> 5mthf[c] + oh1[e]                                                     |            | Transport, Extracellular                  | ( 6573.1 or 6573.2 )                                                                                 |
| 5THFtl             | 5-glutamyl-THF transport, lysosomal                                                                                          | 5thf[c] --> 5thf[l]                                                                         |            | Transport, Lysosomal                      |                                                                                                      |
| 5THFtm             | 5-glutamyl-THF transport,m mitochondrial                                                                                     | 5thf[m] --> 5thf[c]                                                                         |            | Transport, Mitochondrial                  |                                                                                                      |
| 6DHFtl             | 6-glutamyl-DHF transport, lysosomal                                                                                          | 6dhf[c] --> 6dhf[l]                                                                         |            | Transport, Lysosomal                      |                                                                                                      |
| 6DHFtm             | 6-glutamyl-DHF transport,m mitochondrial                                                                                     | 6dhf[m] --> 6dhf[c]                                                                         |            | Transport, Mitochondrial                  |                                                                                                      |
| 6HTSTSTERONEte     | hydroxylated testosterone transport                                                                                          | 6htststerone[c] <=> 6htststerone[e]                                                         |            | Transport, Extracellular                  |                                                                                                      |
| 6HTSTSTERONEtr     | hydroxylated testosterone transport                                                                                          | 6htststerone[c] <=> 6htststerone[r]                                                         |            | Transport, Endoplasmic Reticular          |                                                                                                      |
| 6THFtl             | 6-glutamyl-THF transport, lysosomal                                                                                          | 6thf[c] --> 6thf[l]                                                                         |            | Transport, Lysosomal                      |                                                                                                      |
| 6THFtm             | 6-glutamyl-THF transport,m mitochondrial                                                                                     | 6thf[m] --> 6thf[c]                                                                         |            | Transport, Mitochondrial                  |                                                                                                      |
| 7DHCHESTEROLtr     | cholesterol precursor intracellular transport                                                                                | 7dhcsterol[r] <=> 7dhcsterol[c]                                                             |            | Transport, Endoplasmic Reticular          |                                                                                                      |
| 7DHFtl             | 7-glutamyl-DHF transport, lysosomal                                                                                          | 7dhf[c] --> 7dhf[l]                                                                         |            | Transport, Lysosomal                      |                                                                                                      |
| 7DHFtm             | 7-glutamyl-DHF transport,m mitochondrial                                                                                     | 7dhf[m] --> 7dhf[c]                                                                         |            | Transport, Mitochondrial                  |                                                                                                      |
| 7THFtl             | 7-glutamyl-THF transport, lysosomal                                                                                          | 7thf[c] --> 7thf[l]                                                                         |            | Transport, Lysosomal                      |                                                                                                      |
| 7THFtm             | 7-glutamyl-THF transport,m mitochondrial                                                                                     | 7thf[m] --> 7thf[c]                                                                         |            | Transport, Mitochondrial                  |                                                                                                      |
| A_MANASE           | alpha-mannosidase                                                                                                            | [c] : (2) h2o + m2mn --> (2) man + mn                                                       | 3.2.1.24   | N-Glycan Degradation                      | 4123.1                                                                                               |
| A_MANASEly         | alpha-mannosidase, lysosomal                                                                                                 | [l] : (2) h2o + m2mn --> (2) man + mn                                                       | 3.2.1.24   | N-Glycan Degradation                      | 4125.1                                                                                               |
| A4GALTc            | Lactosylceramide 4-alpha-galactosyltransferase                                                                               | [c] : galgluside_hs + udpgal --> h + thcrm_hs + udp                                         |            | Sphingolipid Metabolism                   | 53947.1                                                                                              |
| A4GALTg            | Lactosylceramide 4-alpha-galactosyltransferase                                                                               | [g] : galgluside_hs + udpgal --> h + thcrm_hs + udp                                         |            | Sphingolipid Metabolism                   | 53947.1                                                                                              |
| A4GNT1g            | alpha 1,4-N-acetylglucosaminyltransferase, Golgi apparatus                                                                   | [g] : T_antigen + uacgam --> gncore1 + h + udp                                              |            | O-Glycan Biosynthesis                     | 51146.1                                                                                              |
| A4GNT2g            | alpha 1,4-N-acetylglucosaminyltransferase, Golgi apparatus                                                                   | [g] : core2 + uacgam --> gncore2 + h + udp                                                  |            | O-Glycan Biosynthesis                     | 51146.1                                                                                              |
| AACOAT             | Acetoacetyl-CoA:acetate CoA-transferase                                                                                      | [c] : acac + atp + coa <=> aacoa + amp + ppi                                                | 6.2.1.16   | Propanoate Metabolism                     | 65985.1                                                                                              |
| AACTOOR            | Aminoacetone:oxygen oxidoreductase(deaminating)(flavin-containing)                                                           | [c] : aact + h2o + o2 --> h2o2 + mthgx1 + nh4                                               |            | Glycine, Serine, and Threonine Metabolism | 8639.1                                                                                               |
| AACTm              | Aminoacetone transport (mitochondrial)                                                                                       | aact[m] --> aact[c]                                                                         |            | Transport, Mitochondrial                  |                                                                                                      |
| AAPSAS             | AAPSAS                                                                                                                       | [c] : h + h2o + thp2c --> L2aadp6sa                                                         |            | Lysine Metabolism                         |                                                                                                      |
| AASAD3             | L-aminoadipate-semialdehyde dehydrogenase (NADH)                                                                             | [c] : L2aadp6sa + h2o + nad --> L2aadp + (2) h + nadh                                       | 1.2.1.31   | Lysine Metabolism                         |                                                                                                      |
| AASAD3m            | L-aminoadipate-semialdehyde dehydrogenase (NADH), mitochondrial                                                              | [m] : L2aadp6sa + h2o + nad --> L2aadp + (2) h + nadh                                       | 1.2.1.31   | Lysine Metabolism                         |                                                                                                      |
| AATAi              | 2-aminoadipate transaminase, irreversible                                                                                    | [c] : L2aadp + agk --> 2oxoadp + glu-L                                                      | 2.6.1.39   | Lysine Metabolism                         | ( 51166.1 or 51166.2 )                                                                               |
| ABO1g              | ABO blood group (transferase A, alpha 1-3-N-acetylgalactosaminyltransferase; transferase B, alpha 1-3-galactosyltransferase) | [g] : fucgalaclegalgluside_hs + udpgal --> acgalfucgalaclegalgluside_hs + h + udp           |            | Blood Group Biosynthesis                  | 28.1                                                                                                 |
| ABO2g              | ABO blood group (transferase A, alpha 1-3-N-acetylgalactosaminyltransferase; transferase B, alpha 1-3-galactosyltransferase) | [g] : fucgalaclegalgluside_hs + udpgal --> galfucgalaclegalgluside_hs + h + udp             |            | Blood Group Biosynthesis                  | 28.1                                                                                                 |
| ABO3g              | ABO blood group (transferase A, alpha 1-3-N-acetylgalactosaminyltransferase; transferase B, alpha 1-3-galactosyltransferase) | [g] : fuc12gal14aclegalgluside_hs + udpgal --> gal12gal14aclegalgluside_hs + h + udp        |            | Blood Group Biosynthesis                  | 28.1                                                                                                 |

| Abbreviation                                     | Reaction Name                                                                                                                | Reaction                                                                                                                         | E.C. #   | Pathway                                    | Gene association                                                                                                                                  |
|--------------------------------------------------|------------------------------------------------------------------------------------------------------------------------------|----------------------------------------------------------------------------------------------------------------------------------|----------|--------------------------------------------|---------------------------------------------------------------------------------------------------------------------------------------------------|
| ABO4g                                            | ABO blood group (transferase A, alpha 1-3-N-acetylgalactosaminyltransferase; transferase B, alpha 1-3-galactosyltransferase) | [g] : fuc12gal14aclegalgluside_hs + udpacgal -> acgalfuc12gal14aclegalgluside_hs + h + udp                                       |          | Blood Group Biosynthesis                   | 28.1                                                                                                                                              |
| ABO5g                                            | ABO blood group (transferase A, alpha 1-3-N-acetylgalactosaminyltransferase; transferase B, alpha 1-3-galactosyltransferase) | [g] : fucgalacgalfuc12gal14aclegalgluside_hs + udpacgal -> acgalfucgalacgalfuc12gal14aclegalgluside_hs + h + udp                 |          | Blood Group Biosynthesis                   | 28.1                                                                                                                                              |
| ABO6g                                            | ABO blood group (transferase A, alpha 1-3-N-acetylgalactosaminyltransferase; transferase B, alpha 1-3-galactosyltransferase) | [g] : fucgalaclegal14aclegalgluside_hs + udpacgal -> acgalfucgalaclegal14aclegalgluside_hs + h + udp                             |          | Blood Group Biosynthesis                   | 28.1                                                                                                                                              |
| ABO7g                                            | ABO blood group (transferase A, alpha 1-3-N-acetylgalactosaminyltransferase; transferase B, alpha 1-3-galactosyltransferase) | [g] : fucgalacgalfucgalaclegal14aclegalgluside_hs + udpacgal -> acgalfucgalacgalfucgalaclegal14aclegalgluside_hs + h + udp       |          | Blood Group Biosynthesis                   | 28.1                                                                                                                                              |
| ABO8g                                            | ABO blood group (transferase A, alpha 1-3-N-acetylgalactosaminyltransferase; transferase B, alpha 1-3-galactosyltransferase) | [g] : fucgalaclegal14aclegalgluside_hs + udpgal -> galfucgalaclegal14aclegalgluside_hs + h + udp                                 |          | Blood Group Biosynthesis                   | 28.1                                                                                                                                              |
| ABO9g                                            | ABO blood group (transferase A, alpha 1-3-N-acetylgalactosaminyltransferase; transferase B, alpha 1-3-galactosyltransferase) | [g] : fucfucgalaclegalaclegal14aclegalgluside_hs + (2) udpgal -> galfucfucgalaclegalaclegal14aclegalgluside_hs + (2) h + (2) udp |          | Blood Group Biosynthesis                   | 28.1                                                                                                                                              |
| ABTArm                                           | 4-aminobutyrate transaminase, reversible (mitochondrial)                                                                     | [m] : 4abut + akgl <=> glu-L + sucsal                                                                                            | 2.6.1.19 | Glutamate metabolism                       | ( 18.1 or 18.2 )                                                                                                                                  |
| ABTD                                             | L-arabinitol 4-dehydrogenase                                                                                                 | [c] : abt + nad <=> h + nadh + xyLu-L                                                                                            | 1.1.1.12 | Pentose and Glucuronate Interconversions   |                                                                                                                                                   |
| ABTi                                             | L-arabinitol transport via passive diffusion                                                                                 | ab[c] -> ab[c]                                                                                                                   |          | Transport, Extracellular                   |                                                                                                                                                   |
| ABUTD                                            | Aminobutyraldehyde dehydrogenase                                                                                             | [c] : 4abut + h2o + nad -> 4abut + (2) h + nadh                                                                                  | 1.2.1.19 | beta-Alanine metabolism                    | 223.1                                                                                                                                             |
| ABUT2r                                           | 4-aminobutyrate reversible transport in via proton symport                                                                   | 4abut[e] + h[e] <=> 4abut[c] + h[c]                                                                                              |          | Transport, Extracellular                   | 206358.1                                                                                                                                          |
| ABUT2L                                           | 4-aminobutyrate reversible transport in via proton symport (lysosome)                                                        | 4abut[l] + h[l] <=> 4abut[c] + h[c]                                                                                              |          | Transport, Lysosomal                       | 206358.1                                                                                                                                          |
| ABUT4(2)r                                        | 4-aminobutyrate reversible transport in via sodium symport (1:2)                                                             | 4abut[e] + (2) na[l] <=> 4abut[c] + (2) na[l]c                                                                                   |          | Transport, Extracellular                   | ( 6538.1 or 6539.1 or 6540.1 or 6529.1 )                                                                                                          |
| ACACT1                                           | acetyl-CoA C-acetyltransferase                                                                                               | [c] : (2) accoa -> accoa + coa                                                                                                   | 2.3.1.9  | Cholesterol Metabolism                     | 39.1                                                                                                                                              |
| ACACT10m                                         | acetyl-CoA C-acetyltransferase, mitochondrial                                                                                | [m] : 2macoa + coa <=> accoa + ppcoa                                                                                             | 2.3.1.9  | Valine, Leucine, and Isoleucine Metabolism | 38.1                                                                                                                                              |
| ACACT1r                                          | acetyl-CoA C-acetyltransferase                                                                                               | [c] : (2) accoa <=> accoa + coa                                                                                                  | 2.3.1.9  | Tryptophan metabolism                      | 39.1                                                                                                                                              |
| ACACT1rm                                         | acetyl-CoA C-acetyltransferase, mitochondrial                                                                                | [m] : (2) accoa <=> accoa + coa                                                                                                  | 2.3.1.9  | Tryptophan metabolism                      | ( ( 3032.1 and 3030.1 ) or 38.1 )                                                                                                                 |
| ACACT1x                                          | acetyl-CoA C-acetyltransferase, mitochondrial                                                                                | [x] : (2) accoa -> accoa + coa                                                                                                   | 2.3.1.9  | Cholesterol Metabolism                     | 39.1                                                                                                                                              |
| ACAC2                                            | acetoacetate transport via proton symport                                                                                    | acac[e] + h[e] <=> acac[c] + h[c]                                                                                                |          | Transport, Extracellular                   | ( 6566.1 or 9194.1 )                                                                                                                              |
| ACAC2m                                           | Acetoacetate mitochondrial transport via H+ symport                                                                          | acac[c] + h[c] <=> acac[m] + h[m]                                                                                                |          | Transport, Mitochondrial                   | 6566.1                                                                                                                                            |
| ACACT4p                                          | acetyl-CoA C-acetyltransferase (octanoyl-CoA), peroxisomal                                                                   | [x] : 3odcoa + coa -> accoa + occoa                                                                                              | 2.3.1.16 | Fatty Acid Metabolism                      | 30.1                                                                                                                                              |
| ACACT5p                                          | acetyl-CoA C-acyltransferase (decanoyl-CoA), peroxisomal                                                                     | [x] : 3odcoa + coa -> accoa + dcacoa                                                                                             | 2.3.1.16 | Fatty Acid Metabolism                      | 30.1                                                                                                                                              |
| ACACT6p                                          | acetyl-CoA C-acetyltransferase (dodecanoyl), peroxisomal                                                                     | [x] : 3otdcoa + coa -> accoa + ddcacoa                                                                                           | 2.3.1.16 | Fatty Acid Metabolism                      | 30.1                                                                                                                                              |
| ACACT7p                                          | acetyl-CoA acyltransferase (tetradecanoyl-CoA), peroxisomal                                                                  | [x] : 3ohdcoa + coa -> accoa + tdcoa                                                                                             | 2.3.1.16 | Fatty Acid Metabolism                      | 30.1                                                                                                                                              |
| ACACT8p                                          | acetyl-CoA acyltransferase (hexadecanoyl-CoA), peroxisomal                                                                   | [x] : 3ohodcoa + coa -> accoa + pmtdcoa                                                                                          | 2.3.1.16 | Fatty Acid Metabolism                      | 30.1                                                                                                                                              |
| ACACT9p                                          | acetyl-CoA acyltransferase (tetracosanoyl-CoA), peroxisomal                                                                  | [x] : 3ohxcco + coa -> accoa + ttcco                                                                                             | 2.3.1.16 | Fatty Acid Metabolism                      | 30.1                                                                                                                                              |
| ACACtx                                           | acetoacetate intracellular transport unknown mechanism                                                                       | acac[c] <=> acac[x]                                                                                                              |          | Transport, Peroxisomal                     |                                                                                                                                                   |
| ACALDi                                           | acetaldehyde reversible transport                                                                                            | acald[e] <=> acald[c]                                                                                                            |          | Transport, Extracellular                   |                                                                                                                                                   |
| ACALDm                                           | acetaldehyde mitochondrial diffusion                                                                                         | acald[m] <=> acald[c]                                                                                                            |          | Transport, Mitochondrial                   |                                                                                                                                                   |
| ACALDx                                           | acetaldehyde peroxisomal diffusion                                                                                           | acald[x] <=> acald[c]                                                                                                            |          | Transport, Peroxisomal                     |                                                                                                                                                   |
| ACCOAC                                           | acetyl-CoA carboxylase                                                                                                       | [c] : accoa + atp + hco3 -> adp + h + malcoa + pi                                                                                | 6.4.1.2  | Fatty Acid Metabolism                      | ( 31.2 or 31.4 or 31.1 or 31.3 or 31.5 or ( 31.2 and 32.1 ) or ( 31.3 and 32.1 ) or ( 31.4 and 32.1 ) or ( 31.5 and 32.1 ) or ( 31.1 and 32.1 ) ) |
| ACCOACm                                          | Acetyl-Coa carboxylase, beta isoform                                                                                         | [m] : accoa + atp + hco3 -> adp + h + malcoa + pi                                                                                | 6.4.1.2  | Fatty Acid Metabolism                      | 32.1                                                                                                                                              |
| ACCOAgt                                          | acetyl-coa transport                                                                                                         | accoa[e] <=> accoa[g]                                                                                                            |          | Transport, Extracellular                   | 9197.1                                                                                                                                            |
| ACCOAL                                           | acetate-CoA ligase (ADP-forming)                                                                                             | [c] : atp + coa + ppa -> adp + pi + ppcoa                                                                                        | 6.2.1.13 | Propanoate Metabolism                      | ( 55902.1 or 55902.2 )                                                                                                                            |
| ACCOALm                                          | acetate-CoA ligase (AMP-forming)                                                                                             | [m] : atp + coa + ppa -> amp + ppcoa + ppi                                                                                       | 6.2.1.17 | Propanoate Metabolism                      | 84532.1                                                                                                                                           |
| ACCOAm                                           | acetyl-CoA transport, nuclear                                                                                                | accoa[c] <=> accoa[n]                                                                                                            |          | Transport, Nuclear                         |                                                                                                                                                   |
| ACCOAr                                           | acetyl-coa transport                                                                                                         | accoa[c] <=> accoa[r]                                                                                                            |          | Transport, Endoplasmic Reticular           | 9197.1                                                                                                                                            |
| ACETONEi2                                        | acetone transport via proton symport                                                                                         | acetone[e] + h[e] <=> acetone[c] + h[c]                                                                                          |          | Transport, Extracellular                   | ( 6566.1 or 9194.1 or 9123.1 )                                                                                                                    |
| ACETONEi2m                                       | acetone mitochondrial transport via proton symport                                                                           | acetone[c] + h[c] <=> acetone[m] + h[m]                                                                                          |          | Transport, Mitochondrial                   | 6566.1                                                                                                                                            |
| ACGAGBSIDEg                                      | acgagbside_hs intracellular transport                                                                                        | acgagbside_hs[c] <=> acgagbside_hs[g]                                                                                            |          | Transport, Golgi Apparatus                 |                                                                                                                                                   |
| ACGAGBSIDEi                                      | acgagbside_hs intracellular transport                                                                                        | acgagbside_hs[c] <=> acgagbside_hs[l]                                                                                            |          | Transport, Lysosomal                       |                                                                                                                                                   |
| ACGALFUCGALACGALFUCI2GAL14ACGLCGALGLUSIDEe       | blood group intracellular transport                                                                                          | acgalfucgalacgalfuc12gal14aclegalgluside_hs[e] <=> acgalfucgalacgalfuc12gal14aclegalgluside_hs[c]                                |          | Transport, Extracellular                   |                                                                                                                                                   |
| ACGALFUCGALACGALFUCI2GAL14ACGLCGALGLUSIDEg       | blood group intracellular transport                                                                                          | acgalfucgalacgalfuc12gal14aclegalgluside_hs[g] <=> acgalfucgalacgalfuc12gal14aclegalgluside_hs[c]                                |          | Transport, Golgi Apparatus                 |                                                                                                                                                   |
| ACGALFUCGALACGALFUCGALACGLCGAL14ACGLCGALGLUSIDEe | blood group intracellular transport                                                                                          | acgalfucgalacgalfucgalaclegal14aclegalgluside_hs[e] <=> acgalfucgalacgalfucgalaclegal14aclegalgluside_hs[c]                      |          | Transport, Extracellular                   |                                                                                                                                                   |
| ACGALFUCGALACGALFUCGALACGLCGAL14ACGLCGALGLUSIDEg | blood group intracellular transport                                                                                          | acgalfucgalacgalfucgalaclegal14aclegalgluside_hs[g] <=> acgalfucgalacgalfucgalaclegal14aclegalgluside_hs[c]                      |          | Transport, Golgi Apparatus                 |                                                                                                                                                   |
| ACGALK                                           | N-acetylgalactosamine kinase                                                                                                 | [c] : acgal + atp -> acgal1p + adp + h                                                                                           |          | Aminosugar Metabolism                      |                                                                                                                                                   |
| ACGALK2                                          | N-acetylgalactosamine kinase (FIP)                                                                                           | [c] : acgal + itp -> acgal1p + h + idp                                                                                           |          | Aminosugar Metabolism                      |                                                                                                                                                   |

| Abbreviation                      | Reaction Name                                                             | Reaction                                                                              | E.C. #    | Pathway                                                | Gene association                                                   |
|-----------------------------------|---------------------------------------------------------------------------|---------------------------------------------------------------------------------------|-----------|--------------------------------------------------------|--------------------------------------------------------------------|
| ACGALdg                           | N-acetyl-galactosamine intracellular transport                            | acgal[g] <=> acgal[c]                                                                 |           | Transport, Golgi Apparatus                             |                                                                    |
| ACGALdy                           | N-acetyl-galactosamine lysosomal efflux                                   | acgal[l] -> acgal[c]                                                                  |           | Transport, Lysosomal                                   |                                                                    |
| ACGAM2E                           | N-acetylglucosamine 2-epimerase                                           | [c] : acgam <=> acmana                                                                | 5.1.3.8   | Aminosugar Metabolism                                  | 5973.1                                                             |
| ACGAM6PSi                         | N-acetylglucosamine-6-phosphate synthase                                  | [c] : accoa + gam6p -> acgam6p + coa + h                                              | 2.3.1.4   | Aminosugar Metabolism                                  | 64841.1                                                            |
| ACGAMK                            | N-acetylglucosamine kinase                                                | [c] : acgam + atp -> acgam6p + adp + h                                                | 2.7.1.59  | Aminosugar Metabolism                                  | 55577.1                                                            |
| ACGAMPm                           | phosphoacetylglucosamine mutase                                           | [c] : acgam6p <=> acgam1p                                                             | 5.4.2.3   | Aminosugar Metabolism                                  | 5238.1                                                             |
| ACGAMly                           | N-acetyl-glucosamine lysosomal efflux                                     | acgam[l] -> acgam[c]                                                                  |           | Transport, Lysosomal                                   |                                                                    |
| ACGBGSIDEig                       | acgbgside_hs intracellular transport                                      | acgbgside_hs[c] <=> acgbgside_hs[g]                                                   |           | Transport, Golgi Apparatus                             |                                                                    |
| ACGBGSIDEil                       | acgbgside_hs intracellular transport                                      | acgbgside_hs[c] <=> acgbgside_hs[l]                                                   |           | Transport, Lysosomal                                   |                                                                    |
| ACGPD                             | N-acetylglucosaminylphosphatidylinositol deacetylase                      | [c] : acgpail_hs + h2o -> ac + gpail_hs                                               | 3.5.1.89  | Glycosylphosphatidylinositol (GPI)-anchor biosynthesis | 9487.1                                                             |
| ACGSm                             | N-acetylglutamate synthase, mitochondrial                                 | [m] : accoa + glu-L -> acglu + coa + h                                                | 2.3.1.1   | Urea cycle/amino group metabolism                      | 162417.1                                                           |
| ACHEe                             | Acetylcholinesterase                                                      | [e] : ach + h2o -> ac + chol + h                                                      | 3.1.1.7   | Glycerophospholipid Metabolism                         | (43.1 or 43.2)                                                     |
| ACHn                              | Acetylcholin transport, nuclear through pores                             | ach[n] <=> ach[c]                                                                     |           | Transport, Nuclear                                     |                                                                    |
| ACHVESSEC                         | Acetylcholine secretion via secretory vesicle (ATP driven)                | (3) ach[c] + (2) atp[c] + (2) h2o[c] -> (3) ach[e] + (2) adp[c] + (2) h[c] + (2) p[c] |           | Transport, Extracellular                               | 6572.1                                                             |
| ACITL                             | ATP-Citrate lyase                                                         | [c] : atp + cit + coa -> accoa + adp + oaa + pi                                       |           | Citric Acid Cycle                                      | (47.1 or 47.2)                                                     |
| ACN13ACNGALGSIDEe                 | acn13acngalgside_hs transport                                             | acn13acngalgside_hs[c] <=> acn13acngalgside_hs[e]                                     |           | Transport, Extracellular                               |                                                                    |
| ACN13ACNGALGSIDEg                 | acn13acngalgside_hs intracellular transport                               | acn13acngalgside_hs[c] <=> acn13acngalgside_hs[g]                                     |           | Transport, Golgi Apparatus                             |                                                                    |
| ACN23ACNGALGSIDEe                 | acn23acngalgside transport                                                | acn23acngalgside_hs[c] <=> acn23acngalgside_hs[e]                                     |           | Transport, Extracellular                               |                                                                    |
| ACN23ACNGALGSIDEg                 | acn23acngalgside intracellular transport                                  | acn23acngalgside_hs[c] <=> acn23acngalgside_hs[g]                                     |           | Transport, Golgi Apparatus                             |                                                                    |
| ACNACNGAL14ACGLCGALGLUSIDEe       | blood group intracellular transport                                       | acnacngal14acglcgalguside_hs[e] <=> acnacngal14acglcgalguside_hs[c]                   |           | Transport, Extracellular                               |                                                                    |
| ACNACNGAL14ACGLCGALGLUSIDEig      | blood group intracellular transport                                       | acnacngal14acglcgalguside_hs[g] <=> acnacngal14acglcgalguside_hs[c]                   |           | Transport, Golgi Apparatus                             |                                                                    |
| ACNACNGALGSIDEe                   | acnacngalgside_hs transport                                               | acnacngalgside_hs[c] <=> acnacngalgside_hs[e]                                         |           | Transport, Extracellular                               |                                                                    |
| ACNACNGALGSIDEig                  | acnacngalgside_hs intracellular transport                                 | acnacngalgside_hs[c] <=> acnacngalgside_hs[g]                                         |           | Transport, Golgi Apparatus                             |                                                                    |
| ACNAM9PL                          | N-Acetylneuraminate 9-phosphate pyruvate-lyase (pyruvate-phosphorylating) | [e] : acmanap + h2o + pep -> acnamp + pi                                              |           | Aminosugar Metabolism                                  | 54187.1                                                            |
| ACNAM9PL2                         | N-Acetylneuraminate 9-phosphate pyruvate-lyase (pyruvate-phosphorylating) | [e] : h2o + man6p + pep -> kdnf + pi                                                  |           | Aminosugar Metabolism                                  | 54187.1                                                            |
| ACNAMt                            | N-acetylneuraminate transport into lysosome                               | acnam[c] + h[c] <=> acnam[l] + h[l]                                                   |           | Transport, Lysosomal                                   | 26503.1                                                            |
| ACNAMPH                           | N-Acetylneuraminate 9-phosphate phosphohydrolase                          | [e] : acnamp + h2o -> acnam + pi                                                      | 3.1.3.29  | Aminosugar Metabolism                                  |                                                                    |
| ACNAMn                            | N-acetylneuraminate nuclear import                                        | acnam[c] -> acnam[n]                                                                  |           | Transport, Nuclear                                     |                                                                    |
| ACNGALACGLCGAL14ACGLCGALGLUSIDEe  | blood group intracellular transport                                       | acngalacglcgall14acglcgalguside_hs[e] <=> acngalacglcgall14acglcgalguside_hs[c]       |           | Transport, Extracellular                               |                                                                    |
| ACNGALACGLCGAL14ACGLCGALGLUSIDEig | blood group intracellular transport                                       | acngalacglcgall14acglcgalguside_hs[g] <=> acngalacglcgall14acglcgalguside_hs[c]       |           | Transport, Golgi Apparatus                             |                                                                    |
| ACNMLr                            | N-Acetylneuraminate lyase (reversible)                                    | [c] : acnam <=> acmana + pyr                                                          | 4.1.3.3   | Aminosugar Metabolism                                  |                                                                    |
| ACOAD10m                          | acyl-CoA dehydrogenase (2-methylbutanoyl-CoA), mitochondrial              | [m] : 2mbcoa + fad -> 2mb2coa + fadh2                                                 | 1.3.99.12 | Valine, Leucine, and Isoleucine Metabolism             | (36.1 or 34.1)                                                     |
| ACOAD1fm                          | acyl-CoA dehydrogenase (butanoyl-CoA), mitochondrial                      | [m] : bcoa + fad -> b2coa + fadh2                                                     | 1.3.99.2  | Butanoate Metabolism                                   | (27034.1 or 34.1 or 36.1 or 28976.1 or 80724.1 or 84129.1 or 35.1) |
| ACOAD8m                           | acyl-CoA dehydrogenase (isovaleryl-CoA), mitochondrial                    | [m] : fad + ivcoa -> 3mb2coa + fadh2                                                  | 1.3.99.10 | Valine, Leucine, and Isoleucine Metabolism             | 3712.1                                                             |
| ACOAD9m                           | acyl-CoA dehydrogenase (isobutyryl-CoA), mitochondrial                    | [m] : fad + ibcoa -> 2mp2coa + fadh2                                                  | 1.3.99.12 | Valine, Leucine, and Isoleucine Metabolism             | (34.1 or 27034.1)                                                  |
| ACOAHi                            | acetyl-CoA hydrolase                                                      | [c] : accoa + h2o -> ac + coa + h                                                     | 3.1.2.1   | Pyruvate Metabolism                                    | 134526.1                                                           |
| ACOAOp                            | acyl-CoA oxidase (hexadecanoyl-CoA), peroxisomal                          | [x] : o2 + pmtcoa -> h2o2 + hdd2coa                                                   | 1.3.3.6   | Fatty Acid Metabolism                                  | (51.1 or 51.2)                                                     |
| ACOATA                            | Acetyl-CoA ACP transacylase                                               | [c] : ACP + accoa <=> acACP + coa                                                     | 2.3.1.38  | Fatty Acid Metabolism                                  | 2194.1                                                             |
| ACODA                             | acetylmethionine deacetylase                                              | [c] : acorn + h2o -> ac + orn                                                         | 3.5.1.16  | Urea cycle/amino group metabolism                      | 95.1                                                               |
| ACONT                             | aconitase                                                                 | [c] : cit <=> icit                                                                    | 4.2.1.3   | Citric Acid Cycle                                      | (3658.1 or 48.1)                                                   |
| ACONTm                            | Aconitate hydratase                                                       | [m] : cit <=> icit                                                                    | 4.2.1.3   | Citric Acid Cycle                                      | 50.1                                                               |
| ACOX2x                            | acyl-Coenzyme A oxidase 2, branched chain                                 | [x] : dhcholoylcoa + fadh2 + (0.5) o2 -> fad + thcholoylcoa                           | 1.3.3.6   | Bile Acid Biosynthesis                                 | 8309.1                                                             |
| ACOX2x                            | acyl-Coenzyme A oxidase 2, branched chain                                 | [x] : cholcoas + fadh2 + o2 -> cholcoads + fad + (2) h2o                              | 1.3.3.6   | Bile Acid Biosynthesis                                 | 8309.1                                                             |
| ACPI(FMN)                         | acid phosphatase (FMN)                                                    | [e] : fmn + h2o -> pi + ribflv                                                        | 3.1.3.2   | Riboflavin Metabolism                                  | (52.1 or 52.2 or 52.3)                                             |
| ACRNm                             | O-acetylcarnitine transport into mitochondria via diffusion               | acrn[c] -> acrn[m]                                                                    |           | Transport, Mitochondrial                               | 788.1                                                              |
| ACS                               | acetyl-CoA synthetase                                                     | [e] : ac + atp + coa -> accoa + amp + ppi                                             | 6.2.1.1   | Glycolysis/Gluconeogenesis                             | (65985.1 or 55902.1 or 55902.2)                                    |
| ACS2                              | acetyl-CoA synthase (propionate)                                          | [e] : atp + coa + ppa -> amp + pproa + ppi                                            | 6.2.1.1   | Propanoate Metabolism                                  | (55902.1 or 55902.2 or 65985.1)                                    |
| ACSm                              | acetyl-CoA synthetase                                                     | [m] : ac + atp + coa -> accoa + amp + ppi                                             | 6.2.1.1   | Glycolysis/Gluconeogenesis                             | 84532.1                                                            |
| ACSMOT                            | S-Adenosyl-L-methionine:N-acetylserotonin O-methyltransferase             | [e] : 5shoxindoa + amet -> 5moxact + ahcys + h                                        | 2.1.1.4   | Tryptophan metabolism                                  | 438.1                                                              |
| ACSRNTMT                          | S-Adenosyl-L-homocysteine:N-acetylserotonin O-methyltransferase           | [e] : Nacsertn + amet -> ahcys + h + melatn                                           | 2.1.1.4   | Tryptophan metabolism                                  | 438.1                                                              |
| AC2m                              | acetate mitochondrial transport via proton symport                        | ac[e] + h[c] <=> ac[m] + h[m]                                                         |           | Transport, Mitochondrial                               |                                                                    |
| AC2r                              | acetate reversible transport via proton symport                           | ac[e] + h[e] <=> ac[c] + h[c]                                                         |           | Transport, Extracellular                               |                                                                    |
| ACtg                              | acetate transport, Golgi apparatus                                        | ac[e] <=> ac[g]                                                                       |           | Transport, Golgi Apparatus                             |                                                                    |
| ACTLMO                            | acetyl monoxygenase                                                       | [e] : acetol + h + nadph + o2 -> (2) h2o + mthgx1 + nadp                              |           | Pyruvate Metabolism                                    | 1571.1                                                             |
| ACTNMO                            | acetone monoxygenase                                                      | [e] : acetone + h + nadph + o2 -> acetol + h2o + nadp                                 |           | Pyruvate Metabolism                                    | 1571.1                                                             |
| ACYP                              | acylphosphatase                                                           | [e] : 13dpg + h2o -> 3pg + h + pi                                                     | 3.6.1.7   | Glycolysis/Gluconeogenesis                             | (98.1 or 97.1 or 97.2 or 11261.1.1)                                |
| ADA                               | Adenosine deaminase                                                       | [e] : adn + h + h2o -> ins + nh4                                                      | 3.5.4.4   | Purine Catabolism                                      | 100.1                                                              |
| ADAe                              | Adenosine deaminase, extracellular                                        | [e] : adn + h + h2o -> ins + nh4                                                      | 3.5.4.4   | Nucleotides                                            | 100.1                                                              |
| ADCim                             | Acetoacetate decarboxylation (irreversible), mitochondrial                | [m] : acac + h -> acetone + co2                                                       | 4.1.1.4   | Propanoate Metabolism                                  |                                                                    |
| ADeI                              | adenine reversible transport, cytosol                                     | ade[e] <=> ade[c]                                                                     |           | Transport, Extracellular                               | 3177.1                                                             |

| Abbreviation | Reaction Name                                                                   | Reaction                                                                                 | E.C. #    | Pathway                         | Gene association                                                                                         |
|--------------|---------------------------------------------------------------------------------|------------------------------------------------------------------------------------------|-----------|---------------------------------|----------------------------------------------------------------------------------------------------------|
| ADEI1        | adenine facilitated transport from lysosome                                     | ade[1] <=> ade[c]                                                                        |           | Transport, Lysosomal            | 55315.1                                                                                                  |
| ADHAPx       | intracellular transport (peroxisome)                                            | adhap_hs[c] <=> adhsp_hs[x]                                                              |           | Transport, Peroxisomal          |                                                                                                          |
| ADK1         | adenylate kinase                                                                | [c] : amp + atp <=> (2) adp                                                              | 2.7.4.3   | Nucleotides                     | ( 203.1 or 26289.2 or 26289.1 or 122481.1 )                                                              |
| ADK1m        | adenylate kinase, mitochondrial                                                 | [m] : amp + atp <=> (2) adp                                                              | 2.7.4.3   | Nucleotides                     | ( 205.1 or 205.2 or 205.3 or 204.1 or 204.2 or 204.3 )                                                   |
| ADK3         | adenylate kinase (GTP)                                                          | [c] : amp + gtp <=> adp + gdp                                                            |           | Nucleotides                     | ( 26289.1 or 26289.2 )                                                                                   |
| ADK3m        | adenylate kinase (GTP)                                                          | [m] : amp + gtp <=> adp + gdp                                                            |           | Nucleotides                     | 50808.1                                                                                                  |
| ADKd         | adenylate kinase (d form)                                                       | [c] : damp + datp <=> (2) dadp                                                           | 2.7.4.3   | Nucleotides                     | ( 26289.2 or 26289.1 )                                                                                   |
| ADMDC        | adenosylmethionine decarboxylase                                                | [c] : amet + h -> ametam + co2                                                           | 4.1.1.50  | Arginine and Proline Metabolism | 262.1                                                                                                    |
| ADNCYC       | adenylate cyclase                                                               | [c] : atp -> camp + ppi                                                                  | 4.6.1.1   | Nucleotides                     | ( 107.1 or 108.1 or 109.1 or 196883.1 or 111.1 or 112.1 or 112.2 or 113.1 or 114.1 or 115.1 or 55811.1 ) |
| ADNK1        | adenosine kinase                                                                | [c] : adn + atp -> adp + amp + h                                                         | 2.7.1.20  | Nucleotides                     | ( 132.1 or 132.2 )                                                                                       |
| ADNK1m       | adenosine kinase, mitochondrial                                                 | [m] : adn + atp -> adp + amp + h                                                         | 2.7.1.20  | Nucleotides                     |                                                                                                          |
| ADN1         | adenosine facilitated transport in cytosol                                      | adn[e] <=> adn[c]                                                                        |           | Transport, Extracellular        | ( 3177.1 or 2030.1 )                                                                                     |
| ADN4         | adenosine transport (Na/Adn cotransport)                                        | adn[e] + na1[e] -> adn[c] + na1[c]                                                       |           | Transport, Extracellular        | ( 9154.1 or 9153.1 or 64078.1 or 9154.2 )                                                                |
| ADN5         | adenosine transport (1:2 Na/Adn cotransport)                                    | adn[e] + (2) na1[e] -> adn[c] + (2) na1[c]                                               |           | Transport, Extracellular        | 64078.1                                                                                                  |
| ADN1l        | adenosine facilitated transport from lysosome                                   | adn[1] <=> adn[c]                                                                        |           | Transport, Lysosomal            | 55315.1                                                                                                  |
| ADNm         | adenosine facilitated transport in mitochondria                                 | adn[c] <=> adn[m]                                                                        |           | Transport, Mitochondrial        | 2030.1                                                                                                   |
| ADPGLC       | ADPglucose diphosphatase                                                        | [c] : adpglc + h2o -> amp + g1p + (2) h                                                  | 3.6.1.21  | Nucleotides                     | 11164.1                                                                                                  |
| ADPMAN       | ADPmannose diphosphatase                                                        | [c] : adpman + h2o -> amp + (2) h + man1p                                                | 3.6.1.21  | Nucleotides                     | 11164.1                                                                                                  |
| ADPRDP       | ADPribose diphosphatase                                                         | [c] : adprib + h2o -> amp + (2) h + r5p                                                  | 3.6.1.13  | Nucleotides                     | 11164.1                                                                                                  |
| ADPRDPm      | ADPribose diphosphatase (mitochondrial)                                         | [m] : adprib + h2o -> amp + (2) h + r5p                                                  | 3.6.1.13  | Nucleotides                     | ( 53343.1 or 53343.2 or 53343.3 )                                                                        |
| ADPRIB1      | ADPribose transport                                                             | adprib[e] -> adprib[c]                                                                   |           | Transport, Extracellular        | 952.1                                                                                                    |
| ADPT         | adenine phosphoribosyltransferase                                               | [c] : ade + prpp -> amp + ppi                                                            | 2.4.2.7   | Salvage Pathway                 | 353.1                                                                                                    |
| ADPx         | ADP transporter, peroxisomal                                                    | adp[c] <=> adp[x]                                                                        |           | Transport, Peroxisomal          |                                                                                                          |
| ADRNCOAix    | fatty acid intracellular transport                                              | adrcoa[c] <=> adrcoa[x]                                                                  |           | Transport, Peroxisomal          |                                                                                                          |
| ADRNCPT1     | carnitine O-palmitoyltransferase                                                | [c] : adrcoa + crn -> adrcrn + coa                                                       | 2.3.1.21  | Carnitine shuttle               | ( 1375.4 or 1374.1 or 126129.1 or 1375.3 or 1375.2 or 1375.1 )                                           |
| ADRNCPT2     | carnitine transferase                                                           | [m] : adrcrn + coa -> adrcoa + crn                                                       |           | Carnitine shuttle               | 1376.1                                                                                                   |
| ADRNCRN1     | transport into the mitochondria (carnitine)                                     | adrcrn[c] -> adrcrn[m]                                                                   |           | Carnitine shuttle               | ( 788.1 or 788.1 )                                                                                       |
| ADRNLPVESSEC | Adrenaline secretion via secretory vesicle (ATP driven)                         | (3) adrn[c] + (2) atp[c] + (2) h2o[c] -> (2) adp[c] + (3) adrn[e] + (2) h[c] + (2) pi[c] |           | Transport, Extracellular        | ( 6570.1 or 6571.1 )                                                                                     |
| ADRN1        | fatty acid transport via diffusion                                              | adrn[e] <=> adrn[c]                                                                      |           | Transport, Extracellular        |                                                                                                          |
| ADSELK       | adenyl-selenate kinase                                                          | [c] : adsel + atp -> 3pdsel + adp + h                                                    | 2.7.1.25  | Selenoamino acid metabolism     | ( 9061.1 or 9060.1 )                                                                                     |
| ADSK         | adenyl-sulfate kinase                                                           | [c] : aps + atp -> adp + h + paps                                                        | 2.7.1.25  | Nucleotides                     | ( 9060.1 or 9061.1 )                                                                                     |
| ADSL1        | adenylosuccinate lyase                                                          | [c] : dcamp -> amp + fum                                                                 | 4.3.2.2   | Nucleotides                     | ( 158.1 or 158.2 )                                                                                       |
| ADSL2        | adenylosuccinate lyase                                                          | [c] : 25aic -> aicar + fum                                                               | 4.3.2.2   | IMP Biosynthesis                | ( 158.1 or 158.2 )                                                                                       |
| ADSS         | adenylosuccinate synthase                                                       | [c] : asp-L + gtp + imp -> dcamp + gdp + (2) h + pi                                      | 6.3.4.4   | Nucleotides                     | ( 159.1 or 122622.2 or 122622.1 )                                                                        |
| AFLATOXINte  | xenobiotic transport                                                            | aflatoxin[e] <=> aflatoxin[c]                                                            |           | Transport, Extracellular        |                                                                                                          |
| AG13T10g     | N-acetylglucosaminide beta-1,3-N-acetylglucosaminyltransferase, Golgi apparatus | [g] : ksi_pre18 + uacgam -> h + ksi_pre19 + udp                                          | 2.4.1.149 | Keratan sulfate biosynthesis    | ( 374907.2 or 374907.1 or 10678.1 or 10678.2 or 79369.1 or 11041.1 or 93010.1 or 284208.1 or 10331.1 )   |
| AG13T11g     | N-acetylglucosaminide beta-1,3-N-acetylglucosaminyltransferase, Golgi apparatus | [g] : ksi_pre21 + uacgam -> h + ksi_pre22 + udp                                          | 2.4.1.149 | Keratan sulfate biosynthesis    | ( 374907.2 or 374907.1 or 10678.1 or 10678.2 or 79369.1 or 11041.1 or 93010.1 or 284208.1 or 10331.1 )   |
| AG13T12g     | N-acetylglucosaminide beta-1,3-N-acetylglucosaminyltransferase, Golgi apparatus | [g] : ksi_pre24 + uacgam -> h + ksi_pre25 + udp                                          | 2.4.1.149 | Keratan sulfate biosynthesis    | ( 374907.2 or 374907.1 or 10678.1 or 10678.2 or 79369.1 or 11041.1 or 93010.1 or 284208.1 or 10331.1 )   |
| AG13T13g     | N-acetylglucosaminide beta-1,3-N-acetylglucosaminyltransferase, Golgi apparatus | [g] : ksi_pre27 + uacgam -> h + ksi_pre28 + udp                                          | 2.4.1.149 | Keratan sulfate biosynthesis    | ( 374907.2 or 374907.1 or 10678.1 or 10678.2 or 79369.1 or 11041.1 or 93010.1 or 284208.1 or 10331.1 )   |
| AG13T14g     | N-acetylglucosaminide beta-1,3-N-acetylglucosaminyltransferase, Golgi apparatus | [g] : ksi_pre30 + uacgam -> h + ksi_pre31 + udp                                          | 2.4.1.149 | Keratan sulfate biosynthesis    | ( 374907.2 or 374907.1 or 10678.1 or 10678.2 or 79369.1 or 11041.1 or 93010.1 or 284208.1 or 10331.1 )   |
| AG13T15g     | N-acetylglucosaminide beta-1,3-N-acetylglucosaminyltransferase, Golgi apparatus | [g] : ksi_pre33 + uacgam -> h + ksi_pre34 + udp                                          | 2.4.1.149 | Keratan sulfate biosynthesis    | ( 374907.2 or 374907.1 or 10678.1 or 10678.2 or 79369.1 or 11041.1 or 93010.1 or 284208.1 or 10331.1 )   |

| Abbreviation | Reaction Name                                                                   | Reaction                                                         | E.C. #    | Pathway                         | Gene association                                                                                       |
|--------------|---------------------------------------------------------------------------------|------------------------------------------------------------------|-----------|---------------------------------|--------------------------------------------------------------------------------------------------------|
| AG13T16g     | N-acetylglucosaminide beta-1,3-N-acetylglucosaminyltransferase, Golgi apparatus | [g] : ksii_core4_pre2 + uacgam --> h + ksii_core4_pre3 + udp     | 2.4.1.149 | Keratan sulfate biosynthesis    | ( 374907.2 or 374907.1 or 10678.1 or 10678.2 or 10331.1 or 79369.1 or 11041.1 or 93010.1 or 284208.1 ) |
| AG13T17g     | N-acetylglucosaminide beta-1,3-N-acetylglucosaminyltransferase, Golgi apparatus | [g] : ksii_core4_pre4 + uacgam --> h + ksii_core4_pre5 + udp     | 2.4.1.149 | Keratan sulfate biosynthesis    | ( 284208.1 or 93010.1 or 11041.1 or 79369.1 or 10331.1 or 10678.2 or 10678.1 or 374907.1 or 374907.2 ) |
| AG13T18g     | N-acetylglucosaminide beta-1,3-N-acetylglucosaminyltransferase, Golgi apparatus | [g] : ksii_core4_pre7 + uacgam --> h + ksii_core4_pre8 + udp     | 2.4.1.149 | Keratan sulfate biosynthesis    | ( 284208.1 or 93010.1 or 11041.1 or 79369.1 or 10331.1 or 10678.2 or 10678.1 or 374907.1 or 374907.2 ) |
| AG13T1g      | N-acetylglucosaminide beta-1,3-N-acetylglucosaminyltransferase, Golgi apparatus | [g] : ksii_core2_pre2 + uacgam --> h + ksii_core2_pre3 + udp     | 2.4.1.149 | Keratan sulfate biosynthesis    | ( 10331.1 or 374907.2 or 374907.1 or 10678.1 or 10678.2 or 79369.1 or 11041.1 or 93010.1 or 284208.1 ) |
| AG13T2g      | N-acetylglucosaminide beta-1,3-N-acetylglucosaminyltransferase, Golgi apparatus | [g] : ksii_core2_pre4 + uacgam --> h + ksii_core2_pre5 + udp     | 2.4.1.149 | Keratan sulfate biosynthesis    | ( 10331.1 or 374907.2 or 374907.1 or 10678.1 or 10678.2 or 79369.1 or 11041.1 or 93010.1 or 284208.1 ) |
| AG13T3g      | N-acetylglucosaminide beta-1,3-N-acetylglucosaminyltransferase, Golgi apparatus | [g] : ksii_core2_pre7 + uacgam --> h + ksii_core2_pre8 + udp     | 2.4.1.149 | Keratan sulfate biosynthesis    | ( 10678.2 or 79369.1 or 11041.1 or 93010.1 or 284208.1 or 10331.1 or 374907.2 or 374907.1 or 10678.1 ) |
| AG13T4g      | N-acetylglucosaminide beta-1,3-N-acetylglucosaminyltransferase, Golgi apparatus | [g] : ksi_pre1 + uacgam --> h + ksi_pre2 + udp                   | 2.4.1.149 | Keratan sulfate biosynthesis    | ( 374907.2 or 374907.1 or 10678.1 or 10678.2 or 79369.1 or 11041.1 or 93010.1 or 284208.1 or 10331.1 ) |
| AG13T5g      | N-acetylglucosaminide beta-1,3-N-acetylglucosaminyltransferase, Golgi apparatus | [g] : ksi_pre3 + uacgam --> h + ksi_pre4 + udp                   | 2.4.1.149 | Keratan sulfate biosynthesis    | ( 374907.2 or 374907.1 or 10678.1 or 10678.2 or 79369.1 or 11041.1 or 93010.1 or 284208.1 or 10331.1 ) |
| AG13T6g      | N-acetylglucosaminide beta-1,3-N-acetylglucosaminyltransferase, Golgi apparatus | [g] : ksi_pre6 + uacgam --> h + ksi_pre7 + udp                   | 2.4.1.149 | Keratan sulfate biosynthesis    | ( 374907.2 or 374907.1 or 10678.1 or 10678.2 or 79369.1 or 11041.1 or 93010.1 or 284208.1 or 10331.1 ) |
| AG13T7g      | N-acetylglucosaminide beta-1,3-N-acetylglucosaminyltransferase, Golgi apparatus | [g] : ksi_pre9 + uacgam --> h + ksi_pre10 + udp                  | 2.4.1.149 | Keratan sulfate biosynthesis    | ( 374907.2 or 374907.1 or 10678.1 or 10678.2 or 79369.1 or 11041.1 or 93010.1 or 284208.1 or 10331.1 ) |
| AG13T8g      | N-acetylglucosaminide beta-1,3-N-acetylglucosaminyltransferase, Golgi apparatus | [g] : ksi_pre12 + uacgam --> h + ksi_pre13 + udp                 | 2.4.1.149 | Keratan sulfate biosynthesis    | ( 374907.2 or 374907.1 or 10678.1 or 10678.2 or 79369.1 or 11041.1 or 93010.1 or 284208.1 or 10331.1 ) |
| AG13T9g      | N-acetylglucosaminide beta-1,3-N-acetylglucosaminyltransferase, Golgi apparatus | [g] : ksi_pre15 + uacgam --> h + ksi_pre16 + udp                 | 2.4.1.149 | Keratan sulfate biosynthesis    | ( 374907.2 or 374907.1 or 10678.1 or 10678.2 or 79369.1 or 11041.1 or 93010.1 or 284208.1 or 10331.1 ) |
| AGDC         | N-acetylglucosamine-6-phosphate deacetylase                                     | [c] : acgam6p + h2o --> ac + gam6p                               | 3.5.1.25  | Aminosugar Metabolism           | 51005.1                                                                                                |
| AGLPC        | alkyl acylglycerol phosphocholine transferase                                   | [c] : ak2g_hs + cdpchol --> ak2gchol_hs + cmp + h + h2o          |           | Glycerophospholipid Metabolism  |                                                                                                        |
| AGLPED       | alkyl acyl glycerophosphoethanolamine desaturase                                | [c] : ak2gpe_hs + h + nadph + o2 --> dak2gpe_hs + (2) h2o + nadp |           | Glycerophospholipid Metabolism  |                                                                                                        |
| AGLPET       | alkyl acylglycerol phosphoethanolamine transferase                              | [c] : ak2g_hs + cdpea + h --> ak2gpe_hs + cmp + h2o              |           | Glycerophospholipid Metabolism  |                                                                                                        |
| AGLPH        | alkyl glycerol phosphate hydrolase                                              | [c] : ak2gp_hs + h2o --> ak2g_hs + pi                            |           | Glycerophospholipid Metabolism  |                                                                                                        |
| AGLPR        | alkyl glycerol phosphate reductase                                              | [c] : akdhap_hs + h + nadph --> akgp_hs + nadp                   |           | Glycerophospholipid Metabolism  |                                                                                                        |
| AGLPT        | alkyl glycerol phosphate acyltransferase                                        | [c] : Rtotal2 + akgp_hs + h --> ak2gp_hs + h2o                   |           | Glycerophospholipid Metabolism  |                                                                                                        |
| AGMTm        | agmatinase (m)                                                                  | [m] : agm + h2o --> ptrc + urea                                  | 3.5.3.11  | Arginine and Proline Metabolism | 79814.1                                                                                                |
| AGPAT1       | 1-acylglycerol-3-phosphate O-acyltransferase 1                                  | [c] : Rtotal2coa + alpa_hs --> coa + pa_hs                       | 2.3.1.51  | Triacylglycerol Synthesis       | ( 56895.1 or 55326.1 or 56894.2 or 137964.1 or 10554.1 or 10555.1 or 56894.1 )                         |
| AGPex        | alkyl glycerol phosphate transport                                              | akdhap_hs[c] <=> akdhap_hs[x]                                    |           | Transport, Peroxisomal          |                                                                                                        |



| Abbreviation     | Reaction Name                                                                                                                             | Reaction                                                                          | E.C. #   | Pathway                                   | Gene association                                                                                                                                                         |
|------------------|-------------------------------------------------------------------------------------------------------------------------------------------|-----------------------------------------------------------------------------------|----------|-------------------------------------------|--------------------------------------------------------------------------------------------------------------------------------------------------------------------------|
| AGPRim           | N-acetyl-g-glutamyl-phosphate reductase, irreversible mitochondrial                                                                       | [m] : acg5p + h + nadph --> acg5a + nadp + pi                                     | 1.2.1.38 | Urea cycle/amino group metabolism         | 5832.1                                                                                                                                                                   |
| AGPSx            | alkylglycerone phosphate synthase                                                                                                         | [x] : adhap_hs + alkylR1oh --> Rtotal + akdhap_hs + h                             | 2.5.1.26 | Glycerophospholipid Metabolism            | 8540.1                                                                                                                                                                   |
| AGTim            | alanine-glyoxylate transaminase (irreversible), mitochondrial                                                                             | [m] : ala-L + glx --> gly + pyr                                                   | 2.6.1.44 | Alanine and Aspartate Metabolism          | ( 64902.1 or 64850.1 )                                                                                                                                                   |
| AGTx             | alanine-glyoxylate transaminase (irreversible), peroxisomal                                                                               | [x] : ala-L + glx --> gly + pyr                                                   | 2.6.1.44 | Alanine and Aspartate Metabolism          | 189.1                                                                                                                                                                    |
| AHANDROSTANGLCte | glucuronidated compound transport                                                                                                         | ahandrostanglc[c] + atp[c] + h2o[c] --> adp[c] + ahandrostanglc[e] + h[c] + pi[c] |          | Transport, Extracellular                  | 4363.1                                                                                                                                                                   |
| AHANDROSTANGLCr  | glucuronidated compound transport                                                                                                         | ahandrostangle[c] <=> ahandrostangle[r]                                           |          | Transport, Endoplasmic Reticular          |                                                                                                                                                                          |
| AHC              | adenosylhomocysteinase                                                                                                                    | [c] : ahcys + h2o <=> adn + hcys-L                                                | 3.3.1.1  | Methionine Metabolism                     | ( 191.1 or 10768.1 or 10768.2 )                                                                                                                                          |
| AHCYStn          | S-adenosyl-L-homocysteine nuclear transport                                                                                               | ahcys[c] <=> ahcys[n]                                                             |          | Transport, Nuclear                        |                                                                                                                                                                          |
| AHCYStr          | S-Adenosyl-L-homocysteine intracellular diffusion                                                                                         | ahcys[c] <=> ahcys[r]                                                             |          | Transport, Endoplasmic Reticular          |                                                                                                                                                                          |
| AHEXASE2ly       | beta-N-acetylhexosaminidase, lysosomal                                                                                                    | [l] : (3) h2o + n2m2mn --> (3) acgam + m2mn                                       | 3.2.1.52 | N-Glycan Degradation                      | ( 3074.1 or ( 3074.1 and 3073.1 ) or 3073.1 )                                                                                                                            |
| AHEXASEly        | beta-N-acetylhexosaminidase, lysosomal                                                                                                    | [l] : (2) h2o + n2m2mn --> (2) acgam + m2mn                                       | 3.2.1.52 | N-Glycan Degradation                      | ( 3073.1 or ( 3074.1 and 3073.1 ) or 3074.1 )                                                                                                                            |
| AICART           | phosphoribosylaminoimidazolecarboxamide formyltransferase                                                                                 | [c] : 10thf + aicar <=> fprica + thf                                              | 2.1.2.3  | IMP Biosynthesis                          | 471.1                                                                                                                                                                    |
| AIRC             | phosphoribosylaminoimidazole carboxylase                                                                                                  | [c] : air + co2 <=> 5aizc + h                                                     | 4.1.1.21 | IMP Biosynthesis                          | 10606.1                                                                                                                                                                  |
| AKGDm            | 2-oxoglutarate dehydrogenase                                                                                                              | [m] : akg + coa + nad --> co2 + nadh + succoa                                     | 1.2.4.2  | Citric Acid Cycle                         | ( ( 4967.1 and ( 8050.1 and 1738.1 ) and 1743.1 ) or ( ( 8050.1 and 1738.1 ) and 1743.1 and 4967.2 ) )                                                                   |
| AKGMAltm         | alpha-ketoglutarate/malate transporter                                                                                                    | akg[m] + mal-L[c] <=> akgl[c] + mal-L[m]                                          |          | Transport, Mitochondrial                  | 8402.1                                                                                                                                                                   |
| AKG04_3          | AKG transport via sodium symport                                                                                                          | akgl[e] + (3) na1[e] <=> akgl[c] + (3) na1[c]                                     |          | Transport, Extracellular                  | ( 64849.1 or 64849.2 )                                                                                                                                                   |
| AKGp             | AKG transporter, peroxisome                                                                                                               | akgl[c] <=> akgl[x]                                                               |          | Transport, Peroxisomal                    |                                                                                                                                                                          |
| AKRIC1           | aldo-keto reductase family 1, member C1 (chlordione reductase; 3-alpha hydroxysteroid dehydrogenase, type I; dihydrodiol dehydrogenase 4) | [c] : h + nadph + prgstrn --> aprgstrn + nadp                                     |          | Steroid Metabolism                        | 1645.1                                                                                                                                                                   |
| AKRIC41          | aldo-keto reductase family 1, member C4 (chlordione reductase; 3-alpha hydroxysteroid dehydrogenase, type I; dihydrodiol dehydrogenase 4) | [c] : h + nadh + xol7ah --> nad + xol7ah2                                         | 1.1.1.50 | Bile Acid Biosynthesis                    | 1109.1                                                                                                                                                                   |
| AKRIC42          | aldo-keto reductase family 1, member C4 (chlordione reductase; 3-alpha hydroxysteroid dehydrogenase, type I; dihydrodiol dehydrogenase 4) | [c] : h + nadh + xoldioloneh --> nad + xoltriol                                   | 1.1.1.50 | Bile Acid Biosynthesis                    | 1109.1                                                                                                                                                                   |
| AKRID            | aldo-keto reductase family 1, member D1 (delta 4-3-ketosteroid-5-beta-reductase)                                                          | [c] : h + nadph + xol7aone --> nadp + xol7ah                                      |          | Bile Acid Biosynthesis                    | 6718.1                                                                                                                                                                   |
| AKRID2           | aldo-keto reductase family 1, member D1 (delta 4-3-ketosteroid-5-beta-reductase)                                                          | [c] : h + nadph + xoldioloneh --> nadp + xoldioloneh                              |          | Bile Acid Biosynthesis                    | 6718.1                                                                                                                                                                   |
| ALAASNNaEx       | L-alanine/L-asparagine Na-dependent exchange (Ala-L in)                                                                                   | ala-L[e] + asn-L[c] + na1[e] --> ala-L[c] + asn-L[e] + na1[c]                     |          | Transport, Extracellular                  | 6510.1                                                                                                                                                                   |
| ALACYSNaEx       | L-alanine/L-cysteine Na-dependent exchange (Ala-L in)                                                                                     | ala-L[e] + cys-L[c] + na1[e] --> ala-L[c] + cys-L[e] + na1[c]                     |          | Transport, Extracellular                  | ( 6509.1 or 6510.1 )                                                                                                                                                     |
| ALADGLNexR       | L-alanine/glutamine reversible exchange                                                                                                   | ala-D[e] + gln-L[c] <=> ala-D[c] + gln-L[e]                                       |          | Transport, Extracellular                  | ( 6520.1 and 56301.1 )                                                                                                                                                   |
| ALADGLYexR       | D-alanine/glycine reversible exchange                                                                                                     | ala-D[e] + gly[c] <=> ala-D[c] + gly[e]                                           |          | Transport, Extracellular                  | ( 6520.1 and 56301.1 )                                                                                                                                                   |
| ALAGLNexR        | L-alanine/glutamine reversible exchange                                                                                                   | ala-L[e] + gln-L[c] <=> ala-L[c] + gln-L[e]                                       |          | Transport, Extracellular                  | ( 56301.1 and 6520.1 )                                                                                                                                                   |
| ALAGLNNaEx       | L-alanine/L-glutamine Na-dependent exchange (Ala-L in)                                                                                    | ala-L[e] + gln-L[c] + na1[e] --> ala-L[c] + gln-L[e] + na1[c]                     |          | Transport, Extracellular                  | 6510.1                                                                                                                                                                   |
| ALAGLYexR        | L-alanine/glycine reversible exchange                                                                                                     | ala-L[e] + gly[c] <=> ala-L[c] + gly[e]                                           |          | Transport, Extracellular                  | ( 6520.1 and 56301.1 )                                                                                                                                                   |
| ALAR             | alanine racemase                                                                                                                          | [c] : ala-L <=> ala-D                                                             | 5.1.1.1  | Alanine and Aspartate Metabolism          | 11212.1                                                                                                                                                                  |
| ALASERNaEx       | L-alanine/L-serine Na-dependent exchange (Ala-L in)                                                                                       | ala-L[e] + na1[e] + ser-L[c] --> ala-L[c] + na1[c] + ser-L[e]                     |          | Transport, Extracellular                  | ( 6509.1 or 6510.1 )                                                                                                                                                     |
| ALASm            | 5-aminolevulinatase synthase                                                                                                              | [m] : gly + h + succoa --> 5aop + co2 + coa                                       | 2.3.1.37 | Glycine, Serine, and Threonine Metabolism | ( 23464.1 or 211.1 or 211.2 or 212.1 )                                                                                                                                   |
| ALA2r            | L-alanine reversible transport via proton symport                                                                                         | ala-L[e] + h[e] <=> ala-L[c] + h[c]                                               |          | Transport, Extracellular                  | 206358.1                                                                                                                                                                 |
| ALA2rL           | L-alanine reversible transport via proton symport (lysosome)                                                                              | ala-L[l] + h[l] <=> ala-L[c] + h[c]                                               |          | Transport, Lysosomal                      | 206358.1                                                                                                                                                                 |
| ALA4             | Alanine-Sodium symporter                                                                                                                  | ala-L[e] + na1[e] --> ala-L[c] + na1[c]                                           |          | Transport, Extracellular                  | ( 11254.1 or 55089.1 or 54407.1 or 81539.1 or 6541.1 or 6542.1 or 84889.1 )                                                                                              |
| ALATA_L          | L-alanine transaminase                                                                                                                    | [c] : akgl + ala-L <=> glu-L + pyr                                                | 2.6.1.2  | Glutamate metabolism                      | ( 2875.1 or 84706.1 )                                                                                                                                                    |
| ALATHRNNaEx      | L-alanine/L-threonine Na-dependent exchange (Ala-L in)                                                                                    | ala-L[e] + na1[e] + thr-L[c] --> ala-L[c] + na1[c] + thr-L[e]                     |          | Transport, Extracellular                  | ( 6509.1 or 6510.1 )                                                                                                                                                     |
| ALAN1            | Alanine transport (Na, H coupled)                                                                                                         | ala-L[e] + h[c] + (2) na1[c] <=> ala-L[c] + h[e] + (2) na1[c]                     |          | Transport, Extracellular                  | ( 92745.1 or 10991.1 )                                                                                                                                                   |
| ALCD1            | alcohol dehydrogenase (methanol)                                                                                                          | [c] : meoh + nad <=> fald + h + nadh                                              |          | Miscellaneous                             | ( 124.1 or ( 124.1 and 125.1 ) or ( 124.1 and 126.1 ) or ( 126.1 and 125.1 ) or 126.1 or 131.1 or 128.1 or 284273.1 or 125.1 or 127.1 or 130.1 or 137872.1 or 284273.2 ) |
| ALCD21_D         | alcohol dehydrogenase (D-1,2-propanediol)                                                                                                 | [c] : 12ppd-R + nad --> h + latd-D + nadh                                         |          | Pyruvate Metabolism                       | ( 125.1 or ( 126.1 and 125.1 ) or 126.1 or 127.1 or 128.1 or 130.1 or 131.1 or 137872.1 or 124.1 or 284273.1 or 284273.2 or ( 124.1 and 125.1 ) or ( 124.1 and 126.1 ) ) |

| Abbreviation | Reaction Name                                                      | Reaction                                              | E.C. #     | Pathway                                   | Gene association                                                                                                                                                                  |
|--------------|--------------------------------------------------------------------|-------------------------------------------------------|------------|-------------------------------------------|-----------------------------------------------------------------------------------------------------------------------------------------------------------------------------------|
| ALCD21_L     | alcohol dehydrogenase (L-1,2-propanediol)                          | [c]: 12ppd-S + nad --> h + lald-L + nadh              |            | Pyruvate Metabolism                       | ( 124.1 and 125.1 ) or ( 124.1 and 126.1 ) or 124.1 or 137872.1 or 131.1 or 130.1 or 128.1 or 127.1 or 126.1 or ( 126.1 and 125.1 ) or 125.1 or 284273.2 or 284273.1 )            |
| ALCD22_D     | alcohol dehydrogenase (D-lactaldehyde)                             | [c]: lald-D + nad --> h + mthgl + nadh                |            | Pyruvate Metabolism                       | ( 124.1 or ( 124.1 and 125.1 ) or ( 124.1 and 126.1 ) or 125.1 or ( 126.1 and 125.1 ) or 126.1 or 127.1 or 128.1 or 130.1 or 131.1 or 137872.1 or 284273.1 or 284273.2 )          |
| ALCD22_L     | alcohol dehydrogenase (L-lactaldehyde)                             | [c]: lald-L + nad --> h + mthgl + nadh                |            | Pyruvate Metabolism                       | ( 124.1 or ( 124.1 and 125.1 ) or ( 124.1 and 126.1 ) or 125.1 or ( 126.1 and 125.1 ) or 126.1 or 127.1 or 128.1 or 130.1 or 131.1 or 137872.1 or 284273.1 or 284273.2 )          |
| ALCD2f       | alcohol dehydrogenase, forward rxn (ethanol -> acetaldehyde)       | [c]: etoh + nad --> acald + h + nadh                  | 1.1.1.1    | Glycolysis/Gluconeogenesis                | ( 124.1 or 125.1 or 126.1 or ( 124.1 and 125.1 ) or 126.1 or ( 124.1 and 126.1 ) or ( 126.1 and 125.1 ) or 127.1 or 128.1 or 130.1 or 131.1 or 137872.1 or 284273.1 or 284273.2 ) |
| ALCD2yf      | alcohol dehydrogenase (ethanol, NADP), forward reaction            | [c]: etoh + nadp --> acald + h + nadph                | 1.1.1.2    | Glycolysis/Gluconeogenesis                | ( 10327.1 or 10327.2 )                                                                                                                                                            |
| ALDD19x      | aldehyde dehydrogenase (phenylacetaldehyde, NAD)                   | [c]: h2o + nad + pacald --> (2) h + nadh + pac        | 1.2.1.39   | Phenylalanine metabolism                  | ( 218.1 or 220.1 or 221.1 or 222.1 )                                                                                                                                              |
| ALDD19x(P)   | aldehyde dehydrogenase (phenylacetaldehyde, NADP)                  | [c]: h2o + nadp + pacald --> (2) h + nadph + pac      | 1.2.1.39   | Phenylalanine metabolism                  | ( 218.1 or 220.1 or 221.1 or 222.1 )                                                                                                                                              |
| ALDD20x      | aldehyde dehydrogenase (indole-3-acetaldehyde, NAD)                | [c]: h2o + id3acald + nad --> (2) h + ind3ac + nadh   |            | Tryptophan metabolism                     | ( 223.1 or 501.1 or 224.1 or 8854.1 or 8854.2 or 8854.3 or 216.1 )                                                                                                                |
| ALDD20xm     | aldehyde dehydrogenase (indole-3-acetaldehyde, NAD), mitochondrial | [m]: h2o + id3acald + nad --> (2) h + ind3ac + nadh   |            | Tryptophan metabolism                     | ( 8659.1 or 8659.2 or 217.1 or 219.1 )                                                                                                                                            |
| ALDD21       | aldehyde dehydrogenase (pristanal, NAD)                            | [c]: h2o + nad + pristanal --> (2) h + nadh + prist   |            | Fatty Acid Metabolism                     | 224.1                                                                                                                                                                             |
| ALDD2x       | aldehyde dehydrogenase (acetaldehyde, NAD)                         | [c]: acald + h2o + nad --> ac + (2) h + nadh          | 1.2.1.3    | Glycolysis/Gluconeogenesis                | ( 216.1 or 8854.1 or 8854.2 or 8854.3 or 220.1 or 218.1 or 224.1 or 221.1 or 222.1 or 223.1 or 501.1 )                                                                            |
| ALDD2xm      | aldehyde dehydrogenase (acetylaldehyde, NAD), mitochondrial        | [m]: acald + h2o + nad --> ac + (2) h + nadh          | 1.2.1.3    | Glycolysis/Gluconeogenesis                | ( 219.1 or 217.1 )                                                                                                                                                                |
| ALDD2y       | aldehyde dehydrogenase (acetaldehyde, NADP)                        | [c]: acald + h2o + nadp --> ac + (2) h + nadph        | 1.2.1.4    | Glycolysis/Gluconeogenesis                | ( 8854.1 or 8854.2 or 8854.3 or 218.1 or 224.1 or 221.1 or 222.1 )                                                                                                                |
| ALDSTRNe     | aldosterone transport                                              | aldstrn[c] <=> aldstrn[e]                             |            | Transport, Extracellular                  |                                                                                                                                                                                   |
| ALDSTRNm     | aldosterone intracellular transport                                | aldstrn[c] <=> aldstrn[m]                             |            | Transport, Mitochondrial                  |                                                                                                                                                                                   |
| ALKP         | alkaline phosphatase                                               | [c]: dhap + h2o --> dha + pi                          | 3.1.3.1    | Glycerophospholipid Metabolism            | ( 251.1 or 250.1 or 249.1 or 248.1 )                                                                                                                                              |
| ALOX12       | Arachidonate 12-lipoxygenase                                       | [c]: arachd + o2 --> 12HPET                           | 1.13.11.31 | Eicosanoid Metabolism                     | 239.1                                                                                                                                                                             |
| ALOX12R      | Arachidonate 12-lipoxygenase R                                     | [c]: arachd + o2 --> 12RHPET                          | 1.13.11.31 | Eicosanoid Metabolism                     | 242.1                                                                                                                                                                             |
| ALOX15       | Arachidonate 15-lipoxygenase                                       | [c]: arachd + o2 --> 15HPET                           | 1.13.11.33 | Eicosanoid Metabolism                     | ( 247.1 or 246.1 )                                                                                                                                                                |
| ALOX5        | Arachidonate 5-lipoxygenase                                        | [c]: arachd + o2 --> 5HPET                            | 1.13.11.34 | Eicosanoid Metabolism                     | 240.1                                                                                                                                                                             |
| ALOX52       | Arachidonate 5-lipoxygenase                                        | [c]: 5HPET --> h2o + leuktrA4                         |            | Eicosanoid Metabolism                     | 240.1                                                                                                                                                                             |
| ALR          | Aldose reductase                                                   | [c]: h2o + mthgl + nadp --> (2) h + nadph + pyr       | 1.1.1.2    | Glycine, Serine, and Threonine Metabolism | 231.1                                                                                                                                                                             |
| ALR2         | aldose reductase (methylglyoxal)                                   | [c]: h + mthgl + nadph --> acetol + nadp              |            | Pyruvate Metabolism                       | ( 8574.1 or 231.1 or 10327.1 or 10327.2 )                                                                                                                                         |
| ALR3         | aldose reductase (acetol)                                          | [c]: acetol + h + nadph --> 12ppd-S + nadp            |            | Pyruvate Metabolism                       | ( 8574.1 or 231.1 or 10327.1 or 10327.2 )                                                                                                                                         |
| AM6SAD       | aminomuconate-semialdehyde dehydrogenase                           | [c]: am6sa + h2o + nad --> amuco + (2) h + nadh       | 1.2.1.32   | Tryptophan metabolism                     |                                                                                                                                                                                   |
| AMACR2p      | alpha-methylacyl-CoA racemase (reductase)                          | [x]: dhcholestancoa + (0.5) o2 --> dhcholoylcoa + h2o | 5.1.99.4   | Bile Acid Biosynthesis                    | ( 23600.1 or 23600.2 )                                                                                                                                                            |
| AMACR2r      | alpha-methylacyl-CoA racemase (reductase)                          | [r]: dhcholestancoa + (0.5) o2 --> dhcholoylcoa + h2o | 5.1.99.4   | Bile Acid Biosynthesis                    | ( 23600.1 or 23600.2 )                                                                                                                                                            |
| AMACRp       | alpha-methylacyl-CoA racemase                                      | [x]: cholcoar --> cholcoas                            | 5.1.99.4   | Bile Acid Biosynthesis                    | ( 23600.1 or 23600.2 )                                                                                                                                                            |
| AMACRr       | alpha-methylacyl-CoA racemase                                      | [r]: cholcoar --> cholcoas                            | 5.1.99.4   | Bile Acid Biosynthesis                    | ( 23600.1 or 23600.2 )                                                                                                                                                            |
| AMANK        | N-acetyl-D-mannosamine kinase                                      | [c]: acmana + atp --> acmanap + adp + h               | 2.7.1.60   | Aminosugar Metabolism                     | ( 10020.1 or 55577.1 )                                                                                                                                                            |
| AMCOXO       | 2-aminomuconate reductase                                          | [c]: amuco + h + h2o + nadph --> 2oxoadp + nadp + nh4 |            | Tryptophan metabolism                     |                                                                                                                                                                                   |
| AMETr        | S-Adenosyl-L-methionine intracellular diffusion                    | amet[c] <=> amet[r]                                   |            | Transport, Endoplasmic Reticular          |                                                                                                                                                                                   |
| AMET2m       | S-Adenosyl-L-methionine reversible transport, mitochondrial        | ahcys[m] + amet[c] <=> ahcys[c] + amet[m]             |            | Transport, Mitochondrial                  | ( 115286.3 or 115286.1 or 115286.2 )                                                                                                                                              |

| Abbreviation   | Reaction Name                                                 | Reaction                                                                                                  | E.C. #   | Pathway                                   | Gene association                                                                           |
|----------------|---------------------------------------------------------------|-----------------------------------------------------------------------------------------------------------|----------|-------------------------------------------|--------------------------------------------------------------------------------------------|
| AMETm          | S-adenosyl-L-methionine nuclear transport                     | amet[c] <=> amet[m]                                                                                       |          | Transport, Nuclear                        |                                                                                            |
| AMPDA          | Adenosine monophosphate deaminase                             | [c] : amp + h + h2o --> imp + nh4                                                                         |          | Nucleotides                               | ( 270.1 or 272.1 or 271.1 or 271.2 or 271.3 )                                              |
| AMPTASECG      | alanyl aminopeptidase (cys-gly)                               | [c] : cgly + h2o --> cys-L + gly                                                                          | 3.4.11.2 | Glutathione Metabolism                    | 290.1                                                                                      |
| AMPTASECGe     | alanyl aminopeptidase (cys-gly) (e)                           | [e] : cgly + h2o --> cys-L + gly                                                                          | 3.4.11.2 | Glutathione Metabolism                    | 290.1                                                                                      |
| AMPpp          | AMP transporter, peroxisome                                   | amp[c] <=> amp[x]                                                                                         |          | Transport, Peroxisomal                    |                                                                                            |
| AMPtr          | AMP transporter, endoplasmic reticulum                        | amp[c] <=> amp[r]                                                                                         |          | Transport, Endoplasmic Reticular          |                                                                                            |
| AMY1c          | alpha-amylase, extracellular (stch1 -> stch2)                 | [e] : (8) h2o + stch1 --> (8) glc-D + stch2                                                               | 3.2.1.1  | Starch and Sucrose Metabolism             | ( 276.1 or 276.2 or 277.1 or 278.1 or 279.1 or 280.1 or ( 6519.1 and 11136.1 ) or 6520.1 ) |
| AMY2c          | alpha-amylase, extracellular (glygn2 -> glygn4)               | [e] : glygn2 + (8) h2o --> (8) glc-D + glygn4                                                             | 3.2.1.1  | Starch and Sucrose Metabolism             | ( 276.1 or 276.2 or 277.1 or 278.1 or 279.1 or 280.1 or ( 6519.1 and 11136.1 ) or 6520.1 ) |
| ANDRSTRNGLCe   | glucuronidated compound transport                             | andrstrnglc[c] + atp[c] + h2o[c] --> adp[c] + andrstrnglc[e] + h[c] + pi[c]                               |          | Transport, Extracellular                  | 4363.1                                                                                     |
| ANDRSTRNte     | androsterone transport                                        | andrstrn[e] <=> andrstrn[c]                                                                               |          | Transport, Extracellular                  |                                                                                            |
| ANDRSTRNtr     | androsterone intracellular transport                          | andrstrn[r] <=> andrstrn[c]                                                                               |          | Transport, Endoplasmic Reticular          |                                                                                            |
| ANTIPYRENEie   | xenobiotic transport                                          | antipyrene[e] <=> antipyrene[c]                                                                           |          | Transport, Extracellular                  |                                                                                            |
| AOBUTDsm       | L-2-amino-3-oxobutanoate decarboxylation, mitochondrial       | [m] : 2aobut + h --> aact + co2                                                                           |          | Glycine, Serine, and Threonine Metabolism |                                                                                            |
| AP4AH1         | Ap4A hydrolase, asymmetrically                                | [c] : ap4a + h2o --> amp + atp + (2) h                                                                    | 3.6.1.17 | Nucleotides                               | ( 318.1 or 318.2 or 318.3 )                                                                |
| APAT2m         | 3-Aminopropanoate:2-oxoglutarate aminotransferase (m)         | [m] : akgl + ala-B <=> glu-L + msa                                                                        | 2.6.1.19 | beta-Alanine metabolism                   | ( 18.1 or 18.2 )                                                                           |
| APNNOXie       | xenobiotic transport                                          | apnnox[e] <=> apnnox[c]                                                                                   |          | Transport, Extracellular                  |                                                                                            |
| APOCF          | Apocarbonylase formation                                      | [c] : apoC + lys-L --> apoC-Lys + h + h2o                                                                 |          | Biotin Metabolism                         |                                                                                            |
| APOCFm         | Apocarbonylase formation, mitochondrial                       | [m] : apoC + lys-L --> apoC-Lys + h + h2o                                                                 |          | Biotin Metabolism                         |                                                                                            |
| APOC-LYS-BTNP  | proteolysis of apoC-Lys-btn                                   | [e] : apoC-Lys_btn + h2o --> apoC + biocyt                                                                |          | Biotin Metabolism                         |                                                                                            |
| APOC-LYS-BTNPm | proteolysis of apoC-Lys-btn, mitochondrial                    | [m] : apoC-Lys_btn + h2o --> apoC + biocyt                                                                |          | Biotin Metabolism                         |                                                                                            |
| APPNNe         | xenobiotic transport                                          | appn[e] <=> appn[c]                                                                                       |          | Transport, Extracellular                  |                                                                                            |
| APRGSTRNte     | hydroxyprogesterone transport                                 | aprgstrn[e] <=> aprgstrn[c]                                                                               |          | Transport, Extracellular                  |                                                                                            |
| APRTO2         | N-acetylputrescine: oxygen oxidoreductase (deaminating)       | [c] : apnut + h2o + o2 --> h2o2 + n4abutin + nh4                                                          | 1.4.3.4  | Arginine and Proline Metabolism           | ( 4128.1 or 4129.1 )                                                                       |
| AQCOBAL4       | Aquacob(III)alamin uptake                                     | aqcobal[e] --> aqcobal[c]                                                                                 |          | Transport, Extracellular                  |                                                                                            |
| ARAB-L1        | L-arabinose extracellular transport                           | arab-L[e] <=> arab-L[c]                                                                                   |          | Transport, Extracellular                  |                                                                                            |
| ARABR          | arabinose reductase                                           | [c] : arab-L + h + nadph --> abt + nadp                                                                   | 1.1.1.21 | Pentose and Glucuronate Interconversions  | ( 231.1 or 10327.1 or 10327.2 or 8574.1 )                                                  |
| ARACHCOAtx     | fatty acid intracellular transport                            | arachcoa[c] <=> arachcoa[s]                                                                               |          | Transport, Peroxisomal                    |                                                                                            |
| ARACHCPT1      | carnitine transferase                                         | [c] : arachcoa + crn --> arachcm + coa                                                                    | 2.3.1.21 | Carnitine shuttle                         | ( 1375.4 or 1374.1 or 126129.1 or 1375.3 or 1375.2 or 1375.1 )                             |
| ARACHCPT2      | carnitine transferase                                         | [m] : arachcm + coa --> arachcoa + crn                                                                    |          | Carnitine shuttle                         | 1376.1                                                                                     |
| ARACHCRNt      | transport into the mitochondria (carnitine)                   | arachern[c] --> arachern[m]                                                                               |          | Carnitine shuttle                         | 788.1                                                                                      |
| ARACHDCOAtx    | fatty acid intracellular transport                            | arachdcoa[c] <=> arachdcoa[s]                                                                             |          | Transport, Peroxisomal                    |                                                                                            |
| ARACHD2        | fatty acid transport via diffusion                            | arachd[e] <=> arachd[c]                                                                                   |          | Transport, Extracellular                  | ( 6520.1 and 9057.1 )                                                                      |
| ARACHDir       | intracellular transport                                       | arachd[c] <=> arachd[r]                                                                                   |          | Transport, Endoplasmic Reticular          |                                                                                            |
| ARACHt         | fatty acid transport via diffusion                            | arach[e] <=> arach[c]                                                                                     |          | Transport, Extracellular                  |                                                                                            |
| ARGDCm         | arginine decarboxylase (m)                                    | [m] : arg-L + h --> agm + co2                                                                             | 4.1.1.19 | Arginine and Proline Metabolism           | 11345.1                                                                                    |
| ARGLYSex       | Arginine/Lysine exchanger (Arg in)                            | arg-L[e] + lys-L[c] --> arg-L[c] + lys-L[e]                                                               |          | Transport, Extracellular                  | ( 6520.1 and 9057.1 )                                                                      |
| ARGN           | arginase                                                      | [c] : arg-L + h2o --> orn + urea                                                                          | 3.5.3.1  | Urea cycle/amino group metabolism         | 383.1                                                                                      |
| ARGNm          | arginase (m)                                                  | [m] : arg-L + h2o --> orn + urea                                                                          | 3.5.3.1  | Urea cycle/amino group metabolism         | 384.1                                                                                      |
| ARGSL          | argininosuccinate lyase                                       | [c] : argsuc <=> arg-L + fum                                                                              | 4.3.2.1  | Alanine and Aspartate Metabolism          | 435.1                                                                                      |
| ARGSS          | argininosuccinate synthase                                    | [c] : asp-L + atp + citr-L --> amp + argsuc + h + ppi                                                     | 6.3.4.5  | Alanine and Aspartate Metabolism          | ( 445.1 or 445.2 )                                                                         |
| ARG4           | L-arginine transport in via sodium symport                    | arg-L[e] + na1[e] --> arg-L[c] + na1[c]                                                                   |          | Transport, Extracellular                  | 11254.1                                                                                    |
| ARGuDF         | L-arginine transport via diffusion (extracellular to cytosol) | arg-L[e] --> arg-L[c]                                                                                     |          | Transport, Extracellular                  | ( 55089.1 or 6541.1 or 6542.1 or 84889.1 )                                                 |
| ARGm           | arginine mitochondrial transport via ornithine carrier        | arg-L[c] + h[m] <=> arg-L[m] + h[c]                                                                       |          | Transport, Mitochondrial                  | ( 83884.1 or 10166.1 )                                                                     |
| ARSA           | Arylsulfatase A                                               | [l] : h2o + sgalside_hs --> galside_hs + h + so4                                                          | 3.1.6.8  | Sphingolipid Metabolism                   | 410.1                                                                                      |
| ARTCOAL1       | R group coenzyme a ligase                                     | [c] : Rtotal + coa <=> Rtotalcoa                                                                          |          | R Group Synthesis                         |                                                                                            |
| ARTCOAL2       | R group coenzyme a ligase                                     | [c] : Rtotal2 + coa <=> Rtotal2coa                                                                        |          | R Group Synthesis                         |                                                                                            |
| ARTCOAL3       | R group coenzyme a ligase                                     | [c] : Rtotal3 + coa <=> Rtotal3coa                                                                        |          | R Group Synthesis                         |                                                                                            |
| ARTFR11        | R group artificial flux                                       | [c] : pm1coa --> R1coa_hs                                                                                 |          | R Group Synthesis                         |                                                                                            |
| ARTFR12        | R group artificial flux (C16:1)                               | fadh2[m] + hcdco[c] --> R1coa_hs[c] + fad[m]                                                              |          | R Group Synthesis                         |                                                                                            |
| ARTFR13        | R group artificial flux                                       | [c] : t1coa --> (0.875) R1coa_hs                                                                          |          | R Group Synthesis                         |                                                                                            |
| ARTFR202       | R group artificial flux (C18:3, n-3)                          | (2) fadh2[m] + h[m] + ln1ncoa[c] + nadph[m] --> (1.125) R2coa_hs[c] + (2) fad[m] + nadp[m]                |          | R Group Synthesis                         |                                                                                            |
| ARTFR203       | R group artificial flux                                       | (2) fadh2[m] + h[m] + ln1ncoa[c] + nadph[m] --> (1.125) R2coa_hs[c] + (2) fad[m] + nadp[m]                |          | R Group Synthesis                         |                                                                                            |
| ARTFR204       | R group artificial flux                                       | (2) fadh2[m] + (2) h[m] + (2) nadph[m] + strdncoa[c] --> (1.125) R2coa_hs[c] + (2) fad[m] + (2) nadp[m]   |          | R Group Synthesis                         |                                                                                            |
| ARTFR205       | R group artificial flux                                       | dl1n1ncoa[c] + (2) fadh2[m] + h[m] + nadph[m] --> (1.125) R2coa_hs[c] + (2) fad[m] + nadp[m]              |          | R Group Synthesis                         |                                                                                            |
| ARTFR206       | R group artificial flux                                       | arachdcoa[c] + (2) fadh2[m] + (2) h[m] + (2) nadph[m] --> (1.125) R2coa_hs[c] + (2) fad[m] + (2) nadp[m]  |          | R Group Synthesis                         |                                                                                            |
| ARTFR207       | R group artificial flux                                       | [c] : arachcoa --> (1.125) R2coa_hs                                                                       |          | R Group Synthesis                         |                                                                                            |
| ARTFR208       | R group artificial flux                                       | (3) fadh2[m] + (2) h[m] + (2) nadph[m] + tmndncoa[c] --> (1.125) R2coa_hs[c] + (3) fad[m] + (2) nadp[m]   |          | R Group Synthesis                         |                                                                                            |
| ARTFR209       | R group artificial flux                                       | admcoa[c] + (2) fadh2[m] + (2) h[m] + (2) nadph[m] --> (1.375) R2coa_hs[c] + (2) fad[m] + (2) nadp[m]     |          | R Group Synthesis                         |                                                                                            |
| ARTFR210       | R group artificial flux                                       | fadh2[m] + h[m] + ln1ncoa[c] + nadph[m] --> (1.125) R2coa_hs[c] + fad[m] + nadp[m]                        |          | R Group Synthesis                         |                                                                                            |
| ARTFR211       | R group artificial flux                                       | clpndcoa[c] + (3) fadh2[m] + (2) h[m] + (2) nadph[m] --> (1.375) R2coa_hs[c] + (3) fad[m] + (2) nadp[m]   |          | R Group Synthesis                         |                                                                                            |
| ARTFR212       | R group artificial flux                                       | desptn1coa[c] + (3) fadh2[m] + (2) h[m] + (2) nadph[m] --> (1.375) R2coa_hs[c] + (3) fad[m] + (2) nadp[m] |          | R Group Synthesis                         |                                                                                            |
| ARTFR213       | R group artificial flux                                       | e226coa[c] + (3) fadh2[m] + (3) h[m] + (3) nadph[m] --> (1.375) R2coa_hs[c] + (3) fad[m] + (3) nadp[m]    |          | R Group Synthesis                         |                                                                                            |
| ARTFR31        | R group artificial flux                                       | [c] : stcoa --> (1.125) R3coa_hs                                                                          |          | R Group Synthesis                         |                                                                                            |

| Abbreviation | Reaction Name                                             | Reaction                                                                                               | E.C. #   | Pathway                           | Gene association                                     |
|--------------|-----------------------------------------------------------|--------------------------------------------------------------------------------------------------------|----------|-----------------------------------|------------------------------------------------------|
| ARTFR32      | R group artificial flux                                   | fadh2[m] + odcoc[a] -> (1.125) R3coa_hs[c] + fad[m]                                                    |          | R Group Synthesis                 |                                                      |
| ARTFR33      | R group artificial flux                                   | fadh2[m] + vaccco[a] -> (1.125) R3coa_hs[c] + fad[m]                                                   |          | R Group Synthesis                 |                                                      |
| ARTFR34      | R group artificial flux                                   | (2) fadh2[m] + lneldcoc[a] -> (1.125) R3coa_hs[c] + (2) fad[m]                                         |          | R Group Synthesis                 |                                                      |
| ARTFR41      | R group artificial flux                                   | fadh2[m] + hdcoc[a] -> R4coa_hs[c] + fad[m]                                                            |          | R Group Synthesis                 |                                                      |
| ARTFR42      | R group artificial flux                                   | fadh2[m] + odcoc[a] -> (1.125) R4coa_hs[c] + fad[m]                                                    |          | R Group Synthesis                 |                                                      |
| ARTFR43      | R group artificial flux                                   | fadh2[m] + vaccco[a] -> (1.125) R4coa_hs[c] + fad[m]                                                   |          | R Group Synthesis                 |                                                      |
| ARTFR44      | R group artificial flux                                   | (2) fadh2[m] + lneldcoc[a] -> (1.125) R4coa_hs[c] + (2) fad[m]                                         |          | R Group Synthesis                 |                                                      |
| ARTFR45      | R group artificial flux                                   | fadh2[m] + nrvcoc[a] -> (1.5) R4coa_hs[c] + fad[m]                                                     |          | R Group Synthesis                 |                                                      |
| ARTFR46      | R group artificial flux                                   | fadh2[m] + od2coc[a] -> (1.125) R4coa_hs[c] + fad[m]                                                   |          | R Group Synthesis                 |                                                      |
| ARTFR51      | R group artificial flux                                   | [c] : lgncco[a] -> (1.5) R5coa_hs                                                                      |          | R Group Synthesis                 |                                                      |
| ARTFR52      | R group artificial flux                                   | [c] : hexcco[a] -> (1.625) R5coa_hs                                                                    |          | R Group Synthesis                 |                                                      |
| ARTFR53      | R group artificial flux                                   | eicostcoc[a] + (2) fadh2[m] + (2) h[m] + (2) nadp[m] -> (1.25) R5coa_hs[c] + (2) fad[m] + (2) nadp[m]  |          | R Group Synthesis                 |                                                      |
| ARTFR54      | R group artificial flux                                   | (3) fadh2[m] + (2) h[m] + (2) nadp[m] + tetpent6coc[a] -> (1.5) R5coa_hs[c] + (3) fad[m] + (2) nadp[m] |          | R Group Synthesis                 |                                                      |
| ARTFR55      | R group artificial flux                                   | (3) fadh2[m] + (2) h[m] + (2) nadp[m] + tetpent3coc[a] -> (1.5) R5coa_hs[c] + (3) fad[m] + (2) nadp[m] |          | R Group Synthesis                 |                                                      |
| ARTFR56      | R group artificial flux                                   | (2) fadh2[m] + (2) h[m] + (2) nadp[m] + tettet6coc[a] -> (1.5) R5coa_hs[c] + (2) fad[m] + (2) nadp[m]  |          | R Group Synthesis                 |                                                      |
| ARTFR57      | R group artificial flux                                   | (3) fadh2[m] + (3) h[m] + (3) nadp[m] + tethex3coc[a] -> (1.5) R5coa_hs[c] + (3) fad[m] + (3) nadp[m]  |          | R Group Synthesis                 |                                                      |
| ARTFR61      | R group artificial flux                                   | fadh2[m] + hdd2coc[a] -> R6coa_hs[c] + fad[m]                                                          |          | R Group Synthesis                 |                                                      |
| ARTPLM1      | R group to palmitate conversion                           | [c] : Rtotalcoa <=> pmtcoa                                                                             |          | R Group Synthesis                 |                                                      |
| ARTPLM1m     | R group to palmitate conversion                           | [m] : Rtotalcoa <=> pmtcoa                                                                             |          | R Group Synthesis                 |                                                      |
| ARTPLM2      | R group to palmitate conversion                           | [c] : Rtotal2coa <=> pmtcoa                                                                            |          | R Group Synthesis                 |                                                      |
| ARTPLM2m     | R group to palmitate conversion                           | [m] : Rtotal2coa <=> pmtcoa                                                                            |          | R Group Synthesis                 |                                                      |
| ARTPLM3      | R group to palmitate conversion                           | [c] : Rtotal3coa <=> pmtcoa                                                                            |          | R Group Synthesis                 |                                                      |
| ARTPLM3m     | R group to palmitate conversion                           | [m] : Rtotal3coa <=> pmtcoa                                                                            |          | R Group Synthesis                 |                                                      |
| ASAH1        | N-acylsphingosine amidohydrolase                          | [l] : crm_hs + h2o -> Rtotal + sphings                                                                 | 3.5.1.23 | Sphingolipid Metabolism           | (427.1 or 427.2)                                     |
| ASCB0X       | ascorbic acid oxidase                                     | [c] : ascb-L + (2) h + (2) o2s -> dhdascb + (2) h2o2                                                   |          | Ascorbate and Aldarate Metabolism |                                                      |
| ASCBt        | L-ascorbate transport via facilitated diffusion           | ascb-L[e] <=> ascb-L[c]                                                                                |          | Transport, Extracellular          |                                                      |
| ASCB4        | L-ascorbate transport via proton symport                  | ascb-L[e] + na1[e] <=> ascb-L[c] + na1[c]                                                              |          | Transport, Extracellular          | (9963.1 or 9963.2 or 9962.1 or 9962.2)               |
| ASNALNaEx    | L-alanine/L-asparagine Na-dependent exchange (Asn-L in)   | ala-L[c] + asn-L[e] + na1[e] -> ala-L[e] + asn-L[c] + na1[c]                                           |          | Transport, Extracellular          | 6510.1                                               |
| ASNCYSNaEx   | L-cysteine/L-asparagine Na-dependent exchange (Asn-L in)  | asn-L[e] + cys-L[c] + na1[e] -> asn-L[c] + cys-L[e] + na1[c]                                           |          | Transport, Extracellular          | 6510.1                                               |
| ASNLGNNaEx   | L-glutamine/L-asparagine Na-dependent exchange (Asn-L in) | asn-L[e] + gln-L[c] + na1[e] -> asn-L[c] + gln-L[e] + na1[c]                                           |          | Transport, Extracellular          | 6510.1                                               |
| ASNm         | L-asparaginase (mitochondrial)                            | [m] : asn-L + h2o -> asp-L + nh4                                                                       | 3.5.1.1  | Alanine and Aspartate Metabolism  | 80150.1                                              |
| ASN51        | asparagine synthase (glutamine-hydrolysing)               | [c] : asp-L + atp + gln-L + h2o -> amp + asn-L + glu-L + h + ppi                                       | 6.3.5.4  | Alanine and Aspartate Metabolism  | (440.1 or 440.2 or 440.3)                            |
| ASNSERNaEx   | L-serine/L-asparagine Na-dependent exchange (Asn-L in)    | asn-L[e] + na1[e] + ser-L[c] -> asn-L[c] + na1[c] + ser-L[e]                                           |          | Transport, Extracellular          | 6510.1                                               |
| ASN4         | L-asparagine transport in via sodium symport              | asn-L[e] + na1[e] -> asn-L[c] + na1[c]                                                                 |          | Transport, Extracellular          | (11254.1 or 55089.1 or 54407.1 or 81539.1)           |
| ASNTHRNAEx   | L-threonine/L-asparagine Na-dependent exchange (Asn-L in) | asn-L[e] + na1[e] + thr-L[c] -> asn-L[c] + na1[c] + thr-L[e]                                           |          | Transport, Extracellular          | 6510.1                                               |
| ASNm         | L-asparagine transport, mitochondrial                     | asn-L[c] -> asn-L[m]                                                                                   |          | Transport, Mitochondrial          |                                                      |
| ASNn1        | Asparagine transport (Na, H coupled)                      | asn-L[e] + h[c] + (2) na1[e] <=> asn-L[c] + h[e] + (2) na1[c]                                          |          | Transport, Extracellular          | (92745.1 or 10991.1)                                 |
| ASPIDC       | aspartate 1-decarboxylase                                 | [c] : asp-L + h -> ala-B + co2                                                                         | 4.1.1.11 | beta-Alanine metabolism           | (2571.1 or 2571.2)                                   |
| ASPTc        | aspartate carbamoyltransferase (reversible)               | [c] : asp-L + cbp <=> cbasp + h + pi                                                                   | 2.1.3.2  | Pyrimidine Biosynthesis           | 790.1                                                |
| ASPD6        | D-aspartate transport via Na, H symport and K antiport    | asp-D[e] + h[e] + k[c] + (3) na1[e] -> asp-D[c] + h[c] + k[e] + (3) na1[c]                             |          | Transport, Extracellular          | (6505.1 or 6506.1 or 6507.1 or 6511.1 or 6512.1)     |
| ASPDxt       | D-aspartate transport, peroxisomal                        | asp-D[x] <=> asp-D[c]                                                                                  |          | Transport, Peroxisomal            |                                                      |
| ASPGLUm      | aspartate-glutamate mitochondrial shuttle                 | asp-L[m] + glu-L[c] + h[c] <=> asp-L[c] + glu-L[m] + h[m]                                              |          | Transport, Mitochondrial          | (8604.1 or 10165.1)                                  |
| ASPNATm      | aspartate N-acetyltransferase, mitochondrial              | [m] : accoa + asp-L -> Naccap + coa + h                                                                | 2.3.1.17 | Alanine and Aspartate Metabolism  |                                                      |
| ASP6         | L-aspartate transport via Na, H symport and K antiport    | asp-L[e] + h[e] + k[c] + (3) na1[e] -> asp-L[c] + h[c] + k[e] + (3) na1[c]                             |          | Transport, Extracellular          | (6505.1 or 6506.1 or 6507.1 or 6511.1 or 6512.1)     |
| ASPTA        | aspartate transaminase                                    | [c] : akc + asp-L <=> glu-L + oaa                                                                      | 2.6.1.1  | Alanine and Aspartate Metabolism  | 2805.1                                               |
| ASPTAm       | aspartate transaminase                                    | [m] : akc + asp-L <=> glu-L + oaa                                                                      | 2.6.1.1  | Alanine and Aspartate Metabolism  | 2806.1                                               |
| ATP1ter      | ADP/ATP transporter, endoplasmic reticulum                | adp[r] + atp[c] <=> adp[c] + atp[r]                                                                    |          | Transport, Endoplasmic Reticular  |                                                      |
| ATP2ter      | AMP/ATP transporter, endoplasmic reticulum                | amp[r] + atp[c] <=> amp[c] + atp[r]                                                                    |          | Transport, Endoplasmic Reticular  |                                                      |
| ATPasel      | V-type ATPase, H+ transporting, lysosomal                 | atp[c] + (3) h[c] + h2o[c] -> adp[c] + (4) h[l] + pi[c]                                                | 3.6.3.14 | Transport, Lysosomal              |                                                      |
| ATPH1e       | ATP diphosphohydrolase                                    | [e] : atp + (2) h2o -> amp + (2) h + (2) pi                                                            | 3.6.1.5  | Nucleotides                       | (953.1 or 955.1 or 956.1 or 954.2 or 957.1 or 954.1) |
| ATPH2e       | ATP diphosphohydrolase                                    | [e] : adp + h2o -> amp + h + pi                                                                        | 3.6.1.5  | Nucleotides                       | (953.1 or 955.1 or 956.1 or 954.1 or 957.1 or 954.2) |
| ATPS4m       | ATP synthase (four protons for one ATP)                   | adp[m] + (4) h[c] + pi[m] -> atp[m] + (3) h[m] + h2o[m]                                                | 3.6.3.14 | Oxidative Phosphorylation         |                                                      |
| ATPm         | ADP/ATP transporter, mitochondrial                        | adp[c] + atp[m] -> adp[m] + atp[c]                                                                     |          | Transport, Mitochondrial          | (291.1 or 292.1 or 293.1)                            |
| ATPn         | ATP diffusion in nucleus                                  | atp[c] <=> atp[n]                                                                                      |          | Transport, Nuclear                |                                                      |
| ATPx         | ATP transporter, peroxisomal                              | atp[c] <=> atp[x]                                                                                      |          | Transport, Peroxisomal            |                                                      |
| AVITE1t      | alpha-Tocopherol (Vit. E) transport                       | avite1[e] -> avite1[c]                                                                                 |          | Transport, Extracellular          |                                                      |
| AVITE2t      | alpha-tocotrienol (Vit. E) transport                      | avite2[e] -> avite2[c]                                                                                 |          | Transport, Extracellular          |                                                      |
| B_MANNASEly  | beta-mannosidase, lysosomal                               | [l] : h2o + mn -> acgam + man                                                                          | 3.2.1.25 | N-Glycan Degradation              | 4126.1                                               |

| Abbreviation | Reaction Name                                                                        | Reaction                                                                                                 | E.C. #     | Pathway                                    | Gene association                                                   |
|--------------|--------------------------------------------------------------------------------------|----------------------------------------------------------------------------------------------------------|------------|--------------------------------------------|--------------------------------------------------------------------|
| B3GALT3g     | Beta-1,3-galactosyltransferase 3                                                     | [g] : thcrm_hs + udpagal -> gbside_hs + h + udp                                                          | 2.4.1.79   | Sphingolipid Metabolism                    | ( 8706.1 or 8706.2 or 8706.3 or 8706.4 )                           |
| B3GALT41g    | Beta-1,3-galactosyltransferase 4                                                     | [g] : ga2_hs + udpgal -> ga1_hs + h + udp                                                                | 2.4.1.62   | Sphingolipid Metabolism                    | 8705.1                                                             |
| B3GALT42g    | Beta-1,3-galactosyltransferase 4                                                     | [g] : gm2_hs + udpgal -> gm1_hs + h + udp                                                                | 2.4.1.62   | Sphingolipid Metabolism                    | 8705.1                                                             |
| B3GALT43g    | Beta-1,3-galactosyltransferase 4                                                     | [g] : gd2_hs + udpgal -> gd1b_hs + h + udp                                                               | 2.4.1.62   | Sphingolipid Metabolism                    | 8705.1                                                             |
| B3GALT44g    | Beta-1,3-galactosyltransferase 4                                                     | [g] : gt2_hs + udpgal -> gt1c_hs + h + udp                                                               | 2.4.1.62   | Sphingolipid Metabolism                    | 8705.1                                                             |
| B3GALT5g     | Beta-1,3-galactosyltransferase 5                                                     | [g] : gbside_hs + udpgal -> galgbside_hs + h + udp                                                       |            | Sphingolipid Metabolism                    | ( 10317.1 or 10317.2 or 10317.3 or 10317.4 or 10317.5 )            |
| B3GALTg      | Beta galactosyltransferase                                                           | [g] : acglcgalgluside_hs + udpgal -> galaclegalgluside_hs + h + udp                                      | 2.4.1.86   | Blood Group Biosynthesis                   |                                                                    |
| B3GNT11g     | UDP-GlcNAc:betaGal beta-1,3-N-acetylglucosaminyltransferase 1                        | [g] : gal14aclegalgluside_hs + uacgam -> aclegal14aclegalgluside_hs + h + udp                            |            | Blood Group Biosynthesis                   | 10678.1                                                            |
| B3GNT12g     | UDP-GlcNAc:betaGal beta-1,3-N-acetylglucosaminyltransferase 1                        | [g] : galaclegal14aclegalgluside_hs + uacgam -> acglc13galaclegal14aclegalgluside_hs + h + udp           |            | Blood Group Biosynthesis                   | ( 10678.1 or 10678.2 )                                             |
| B3GNT310g    | UDP-GlcNAc:betaGal beta-1,3-N-acetylglucosaminyltransferase 3, Golgi apparatus       | [g] : acglcgalgluside_hs + udpgal -> gal14aclegalgluside_hs + h + udp                                    |            | Blood Group Biosynthesis                   | 10331.1                                                            |
| B3GNT311g    | UDP-GlcNAc:betaGal beta-1,3-N-acetylglucosaminyltransferase 3, Golgi apparatus       | [g] : acgal12gal14aclegalgluside_hs + udpgal -> galacgal12gal14aclegalgluside_hs + h + udp               |            | Blood Group Biosynthesis                   | 10331.1                                                            |
| B3GNT312g    | UDP-GlcNAc:betaGal beta-1,3-N-acetylglucosaminyltransferase 3, Golgi apparatus       | [g] : acglcgal14aclegalgluside_hs + udpgal -> galaclegal14aclegalgluside_hs + h + udp                    |            | Blood Group Biosynthesis                   | 10331.1                                                            |
| B3GNT313g    | UDP-GlcNAc:betaGal beta-1,3-N-acetylglucosaminyltransferase 3, Golgi apparatus       | [g] : acgal13galaclegal14aclegalgluside_hs + udpgal -> galacgal13galaclegal14aclegalgluside_hs + h + udp |            | Blood Group Biosynthesis                   | 10331.1                                                            |
| B3GNT314g    | UDP-GlcNAc:betaGal beta-1,3-N-acetylglucosaminyltransferase 3, Golgi apparatus       | [g] : acglcgalaclegal14aclegalgluside_hs + udpgal -> galaclegalaclegal14aclegalgluside_hs + h + udp      |            | Blood Group Biosynthesis                   | 10331.1                                                            |
| B3GNT315g    | UDP-GlcNAc:betaGal beta-1,3-N-acetylglucosaminyltransferase 3, Golgi apparatus       | [g] : acglc13galaclegal14aclegalgluside_hs + udpgal -> galacglc13galaclegal14aclegalgluside_hs + h + udp |            | Blood Group Biosynthesis                   | 10331.1                                                            |
| B3GNT31g     | UDP-GlcNAc:betaGal beta-1,3-N-acetylglucosaminyltransferase 3, Golgi apparatus       | [g] : thcrm_hs + udpgal -> galtherm_hs + h + udp                                                         |            | Sphingolipid Metabolism                    | 10331.1                                                            |
| B3GNT32g     | UDP-GlcNAc:betaGal beta-1,3-N-acetylglucosaminyltransferase 3, Golgi apparatus       | [g] : galtherm_hs + udpgal -> galgaltherm_hs + h + udp                                                   |            | Sphingolipid Metabolism                    | 10331.1                                                            |
| B3GNT33g     | UDP-GlcNAc:betaGal beta-1,3-N-acetylglucosaminyltransferase 3, Golgi apparatus       | [g] : galgaltherm_hs + udpgal -> galgalgaltherm_hs + h + udp                                             |            | Sphingolipid Metabolism                    | 10331.1                                                            |
| B3GNT34g     | UDP-GlcNAc:betaGal beta-1,3-N-acetylglucosaminyltransferase 3, Golgi apparatus       | [g] : galgbside_hs + uacgam -> aclegalgbbside_hs + h + udp                                               |            | Sphingolipid Metabolism                    | 10331.1                                                            |
| B3GNT35g     | UDP-GlcNAc:betaGal beta-1,3-N-acetylglucosaminyltransferase 3, Golgi apparatus       | [g] : aclegalgbbside_hs + udpgal -> galaclegalgbbside_hs + h + udp                                       |            | Sphingolipid Metabolism                    | 10331.1                                                            |
| B3GNT36g     | UDP-GlcNAc:betaGal beta-1,3-N-acetylglucosaminyltransferase 3, Golgi apparatus       | [g] : acgal + gbside_hs -> acggbbside_hs + h2o                                                           |            | Sphingolipid Metabolism                    | 10331.1                                                            |
| B3GNT37g     | UDP-GlcNAc:betaGal beta-1,3-N-acetylglucosaminyltransferase 3, Golgi apparatus       | [g] : gm2a_hs + udpgal -> gm1a_hs + h + udp                                                              |            | Sphingolipid Metabolism                    | 10331.1                                                            |
| B3GNT38g     | UDP-GlcNAc:betaGal beta-1,3-N-acetylglucosaminyltransferase 3, Golgi apparatus       | [g] : galside_hs + udpgal -> digalside_hs + h + udp                                                      |            | Sphingolipid Metabolism                    | 10331.1                                                            |
| B3GNT39g     | UDP-GlcNAc:betaGal beta-1,3-N-acetylglucosaminyltransferase 3, Golgi apparatus       | [g] : gluside_hs + udpgal -> galgluside_hs + h + udp                                                     |            | Sphingolipid Metabolism                    | 10331.1                                                            |
| B3GNT51g     | UDP-GlcNAc:betaGal beta-1,3-N-acetylglucosaminyltransferase 5                        | [g] : galgluside_hs + uacgam -> aclegalgluside_hs + h + udp                                              |            | Blood Group Biosynthesis                   | 84002.1                                                            |
| BAAT1x       | bile acid Coenzyme A: amino acid N-acyltransferase                                   | [x] : cholcoa + gly -> coa + gchola                                                                      | 2.3.1.65   | Bile Acid Biosynthesis                     | 570.1                                                              |
| BAAT2x       | bile acid Coenzyme A: amino acid N-acyltransferase                                   | [x] : cholcoa + taur -> coa + tchola                                                                     | 2.3.1.65   | Bile Acid Biosynthesis                     | 570.1                                                              |
| BAAT3x       | bile acid Coenzyme A: amino acid N-acyltransferase                                   | [x] : dgcholcoa + gly -> coa + dgchol                                                                    | 2.3.1.65   | Bile Acid Biosynthesis                     | 570.1                                                              |
| BAAT4x       | bile acid Coenzyme A: amino acid N-acyltransferase                                   | [x] : dcholcoa + gly -> coa + gdchola                                                                    | 2.3.1.65   | Bile Acid Biosynthesis                     | 570.1                                                              |
| BAAT5x       | bile acid Coenzyme A: amino acid N-acyltransferase                                   | [x] : dcholcoa + taur -> coa + tdchola                                                                   | 2.3.1.65   | Bile Acid Biosynthesis                     | 570.1                                                              |
| BACCL        | biotin-[acetyl-CoA-carboxylase] ligase                                               | [c] : atp + btn + h -> btamp + ppi                                                                       | 6.3.4.15   | Biotin Metabolism                          | 3141.1                                                             |
| BACCLm       | biotin-[acetyl-CoA-carboxylase] ligase, mitochondrial                                | [m] : atp + btn + h -> btamp + ppi                                                                       | 6.3.4.15   | Biotin Metabolism                          | 3141.1                                                             |
| BALAtmr      | Beta-alanine reversible mitochondrial transport (diffusion)                          | ala-B[c] <=> ala-B[m]                                                                                    |            | Transport, Mitochondrial                   |                                                                    |
| BALAVECSEC   | B-alanine secretion via secretory vesicle (ATP driven)                               | (3) ala-B[c] + atp[c] + h2o[c] -> adp[c] + (3) ala-B[e] + h[c] + p[c]                                    |            | Transport, Extracellular                   | 140679.1                                                           |
| BAMPPALDOX   | beta-Aminopropion aldehyde:NAD+ oxidoreductase                                       | [c] : bamppald + h2o + nad -> ala-B + (2) h + nadh                                                       | 1.2.1.3    | beta-Alanine metabolism                    | ( 216.1 or 223.1 or 224.1 or 501.1 or 8854.1 or 8854.2 or 8854.3 ) |
| BAMPPALDOXm  | beta-Aminopropion aldehyde:NAD+ oxidoreductase (m)                                   | [m] : bamppald + h2o + nad -> ala-B + (2) h + nadh                                                       | 1.2.1.3    | beta-Alanine metabolism                    | ( 217.1 or 219.1 or 8659.1 or 8659.2 )                             |
| BBHOX        | 4-Trimethylammoniumbutanoate,2-oxoglutarate:oxylase oxidoreductase (3-hydroxylating) | [c] : 4tmeabutn + ak + o2 -> co2 + crn + succ                                                            |            | Lysine Metabolism                          | 8424.1                                                             |
| BCDO         | beta-Carotene dioxygenase                                                            | [c] : caro + o2 -> (2) retinal                                                                           | 1.14.99.36 | Vitamin A Metabolism                       | 53630.1                                                            |
| BDG2HCYGH    | beta-D-Glucosyl-2-coumarinate glucosylhydrolase                                      | [c] : bdg2hc + h2o -> 2coum + glc-D + h                                                                  | 3.2.1.21   | Stilbene, coumarin and lignin biosynthesis | 57733.1                                                            |
| BDHm         | (R)-3-Hydroxybutanoate:NAD+ oxidoreductase                                           | [m] : bbb + nad <=> acac + h + nadh                                                                      | 1.1.1.30   | Butanoate Metabolism                       | ( 622.2 or 622.1 or 622.3 )                                        |
| BDMT_L       | GDPmannose:chitobiosylidiphosphodolichol beta-D-mannosyltransferase (liver)          | [c] : (0.1) chito2pdol_L + gdpmann -> gdp + h + (0.1) mpdol_L                                            | 2.4.1.142  | N-Glycan Biosynthesis                      | 56052.1                                                            |
| BDMT_U       | GDPmannose:chitobiosylidiphosphodolichol beta-D-mannosyltransferase (uterus)         | [c] : (0.1) chito2pdol_U + gdpmann -> gdp + h + (0.1) mpdol_U                                            | 2.4.1.142  | N-Glycan Biosynthesis                      | 56052.1                                                            |
| BETALDHx     | betaine-aldehyde dehydrogenase                                                       | [c] : betald + h2o + nad -> glyb + (2) h + nadh                                                          | 1.2.1.8    | Glycine, Serine, and Threonine Metabolism  | 223.1                                                              |
| BETALDHxm    | betaine-aldehyde dehydrogenase, mitochondrial                                        | [m] : betald + h2o + nad -> glyb + (2) h + nadh                                                          | 1.2.1.8    | Glycine, Serine, and Threonine Metabolism  |                                                                    |

| Abbreviation | Reaction Name                                                         | Reaction                                                                             | E.C. #   | Pathway                                                | Gene association                                             |
|--------------|-----------------------------------------------------------------------|--------------------------------------------------------------------------------------|----------|--------------------------------------------------------|--------------------------------------------------------------|
| BHBt         | (R)-3-Hydroxybutanoate transport via H+ symport                       | bhb[e] + h[e] <=> bhb[c] + h[c]                                                      |          | Transport, Extracellular                               |                                                              |
| BHBm         | (R)-3-Hydroxybutanoate mitochondrial transport via H+ symport         | bhb[c] + h[c] <=> bhb[m] + h[m]                                                      |          | Transport, Mitochondrial                               |                                                              |
| BHMT         | betaine-homocysteine S-methyltransferase                              | [c]: glyb + hcys-L -> dmgly + met-L                                                  | 2.1.1.5  | Glycine, Serine, and Threonine Metabolism              | (23743.1 or 635.1)                                           |
| BILDGLCURt   | bilirubin beta-digluconide transport via bicarbonate countertransport | bidglcur[e] + hco3[c] <=> bidglcur[c] + hco3[e]                                      |          | Transport, Extracellular                               | 10599.1                                                      |
| BILDGLCURte  | bilirubin beta-digluconide transport MDR                              | atp[c] + bidglcur[c] + h2o[c] <=> adp[c] + bidglcur[e] + h[c] + pi[c]                |          | Transport, Extracellular                               | 4363.1                                                       |
| BILDGLCURtr  | glucuronidated compound transport                                     | bidglcur[c] <=> bidglcur[r]                                                          |          | Transport, Endoplasmic Reticular                       |                                                              |
| BILGLCURt    | bilirubin monogluconide transport via bicarbonate countertransport    | bilglcur[e] + hco3[c] <=> bilglcur[c] + hco3[e]                                      |          | Transport, Extracellular                               | (10599.1 or 28234.1)                                         |
| BILGLCURte   | bilirubin monogluconide transport MDR                                 | atp[c] + bilglcur[c] + h2o[c] <=> adp[c] + bilglcur[e] + h[c] + pi[c]                |          | Transport, Extracellular                               | 4363.1                                                       |
| BILGLCURtr   | glucuronidated compound transport                                     | bilglcur[c] <=> bilglcur[r]                                                          |          | Transport, Endoplasmic Reticular                       |                                                              |
| BILIREd      | Nad(p)h biliverdin reductase                                          | [c]: biliverd + h + nadph -> bilirub + nadp                                          | 1.3.1.24 | Heme Degradation                                       | (645.1 or 644.1)                                             |
| BILIRUBi2    | bilirubin transport via bicarbonate countertransport                  | bilirub[e] + hco3[c] <=> bilirub[c] + hco3[e]                                        |          | Transport, Extracellular                               | 10599.1                                                      |
| BILIRUBtr    | lipid, flip-flop intracellular transport                              | bilirub[c] <=> bilirub[r]                                                            |          | Transport, Endoplasmic Reticular                       |                                                              |
| BIOCYTn      | biocytin transport, nuclear                                           | biocyt[c] <=> biocyt[n]                                                              |          | Transport, Nuclear                                     |                                                              |
| BMter_L      | B mannosyltransferase, endoplasmic reticulum                          | [r]: (0.1) dolmamp_L + memgacpaii_hs -> (0.1) dolp_L + h + m2emgacpaii_hs            |          | Glycosylphosphatidylinositol (GPI)-anchor biosynthesis | 9488.1                                                       |
| BMter_U      | B mannosyltransferase, endoplasmic reticulum                          | [r]: (0.1) dolmamp_U + memgacpaii_hs -> (0.1) dolp_U + h + m2emgacpaii_hs            |          | Glycosylphosphatidylinositol (GPI)-anchor biosynthesis | 9488.1                                                       |
| BPNT         | 3',5'-bisphosphate nucleotidase                                       | [c]: h2o + pap -> amp + pi                                                           | 3.1.3.7  | Nucleotides                                            | 10380.1                                                      |
| BPNT2        | 3',5'-bisphosphate nucleotidase (paps)                                | [c]: h2o + paps -> aps + pi                                                          | 3.1.3.7  | Nucleotides                                            | 10380.1                                                      |
| BTND1        | biotinidase (biotin)                                                  | [c]: biocyt + h2o -> btn + lys-L                                                     | 3.5.1.12 | Biotin Metabolism                                      | 686.1                                                        |
| BTND1n       | biotinidase (biotin), nuclear                                         | [n]: biocyt + h2o -> btn + lys-L                                                     | 3.5.1.12 | Biotin Metabolism                                      | 686.1                                                        |
| BTNDe        | biotinidase (biotin), extracellular                                   | [e]: biocyt + h2o -> btn + lys-L                                                     | 3.5.1.12 | Biotin Metabolism                                      | 686.1                                                        |
| BTNDm        | biotinidase (biotin), mitochondrial                                   | [m]: biocyt + h2o -> btn + lys-L                                                     | 3.5.1.12 | Biotin Metabolism                                      | 686.1                                                        |
| BTNPL        | holocarboxylase synthetase (biotin protein ligase)                    | [c]: apoC-Lys + btamp -> amp + apoC-Lys_btn + h                                      |          | Biotin Metabolism                                      | 3141.1                                                       |
| BTNPLm       | holocarboxylase synthetase (biotin protein ligase), mitochondrial     | [m]: apoC-Lys + btamp -> amp + apoC-Lys_btn + h                                      |          | Biotin Metabolism                                      | 3141.1                                                       |
| BTN2         | Biotin reversible transport via proton symport                        | btn[e] + h[e] <=> btn[c] + h[c]                                                      |          | Transport, Extracellular                               | 6566.1                                                       |
| BTN2m        | Biotin reversible transport via proton symport, mitochondria          | btn[c] + h[c] <=> btn[m] + h[m]                                                      |          | Transport, Mitochondrial                               | 6566.1                                                       |
| BTN3i        | Biotin transport via sodium symport                                   | atp[c] + btn[e] + h2o[c] + (2) na1[e] -> adp[c] + btn[c] + h[c] + (2) na1[c] + pi[c] |          | Transport, Extracellular                               | 8884.1                                                       |
| BTN4i        | Biotin uptake (antiport)                                              | btn[e] + h[e] -> btn[c] + h[c]                                                       |          | Transport, Extracellular                               | 80704.1                                                      |
| BTNn         | Biotin transport, nuclear                                             | btn[c] <=> btn[n]                                                                    |          | Transport, Nuclear                                     |                                                              |
| BLP2         | beta-ureidopropionase (D-3-amino-isobutanoate forming)                | [c]: 3uib + (2) h + h2o -> 3uib-D + co2 + nb4                                        | 3.5.1.6  | Pyrimidine Catabolism                                  | 51733.1                                                      |
| BLT2m        | Butyrate mitochondrial transport via proton symport, reversible       | but[c] + h[c] <=> but[m] + h[m]                                                      |          | Transport, Mitochondrial                               | 6566.1                                                       |
| BLT2r        | Butyrate transport via proton symport, reversible                     | but[e] + h[e] <=> but[c] + h[c]                                                      |          | Transport, Extracellular                               | 6566.1                                                       |
| BVITEt       | beta-Tocopherol (Vit. E) transport                                    | bvite[e] -> bvite[c]                                                                 |          | Transport, Extracellular                               |                                                              |
| BZt          | benzoate transport (diffusion)                                        | bz[e] <=> bz[c]                                                                      |          | Transport, Extracellular                               |                                                              |
| BZr          | Benzene transporter, endoplasmic reticulum                            | bz[c] <=> bz[r]                                                                      |          | Transport, Endoplasmic Reticular                       |                                                              |
| C110CPT2m    | C110 transport into the mitochondria                                  | [m]: coa + dmnoncrn -> crn + dmnoncoa                                                |          | Fatty Acid Metabolism                                  |                                                              |
| C14STR       | C-14 sterol reductase                                                 | [r]: 44mctr + h + nadph -> 44mzym + nadp                                             | 1.3.1.70 | Cholesterol Metabolism                                 | 7108.1                                                       |
| C160CPT1     | carnitine O-palmitoyltransferase                                      | [c]: crn + pmcoa -> coa + pmcrn                                                      | 2.3.1.21 | Carnitine shuttle                                      | (1375.1 or 1374.1 or 1375.2 or 1375.3 or 1375.4 or 126129.1) |
| C160CPT2     | C160 transport into the mitochondria                                  | [m]: coa + pmcrn -> crn + pmcoa                                                      |          | Carnitine shuttle                                      | 1376.1                                                       |
| C160CRNt     | C160 transport into the mitochondria                                  | pmcrn[c] -> pmcrn[m]                                                                 |          | Carnitine shuttle                                      | 788.1                                                        |
| C161CPT1     | carnitine O-palmitoyltransferase                                      | [c]: crn + hdcoa -> coa + hdccrn                                                     | 2.3.1.21 | Carnitine shuttle                                      | (1375.4 or 1374.1 or 126129.1 or 1375.3 or 1375.2 or 1375.1) |
| C161CPT12    | carnitine O-palmitoyltransferase                                      | [c]: crn + hdd2coa -> coa + hdd2crn                                                  | 2.3.1.21 | Carnitine shuttle                                      | (1375.1 or 1374.1 or 1375.2 or 1375.3 or 1375.4 or 126129.1) |
| C161CPT2     | C161 transport into the mitochondria                                  | [m]: coa + hdccrn -> crn + hdcoa                                                     |          | Carnitine shuttle                                      | 1376.1                                                       |
| C161CPT22    | C161 transport into the mitochondria                                  | [m]: coa + hdd2crn -> crn + hdd2coa                                                  |          | Carnitine shuttle                                      | 1376.1                                                       |
| C161CRN2i    | C161 transport into the mitochondria                                  | hdd2crn[c] -> hdd2crn[m]                                                             |          | Carnitine shuttle                                      | 788.1                                                        |
| C161CRNt     | C161 transport into the mitochondria                                  | hdccrn[c] -> hdccrn[m]                                                               |          | Carnitine shuttle                                      | 788.1                                                        |
| C180CPT1     | carnitine O-stearoyl transferase                                      | [c]: crn + stcoa -> coa + stern                                                      | 2.3.1.21 | Carnitine shuttle                                      | (126129.1 or 1374.1 or 1375.4 or 1375.3 or 1375.2 or 1375.1) |
| C180CPT2     | carnitine O-stearoyl transferase                                      | [m]: coa + stern -> crn + stcoa                                                      |          | Carnitine shuttle                                      | 1376.1                                                       |
| C180CRNt     | C180 transport into the mitochondria                                  | stern[c] -> stern[m]                                                                 |          | Carnitine shuttle                                      | 788.1                                                        |
| C181CPT1     | carnitine octadecenoyl transferase                                    | [c]: crn + odecoa -> coa + odecrn                                                    | 2.3.1.21 | Carnitine shuttle                                      | (1374.1 or 1375.1 or 1375.2 or 1375.3 or 1375.4 or 126129.1) |
| C181CPT2     | carnitine octadecenoyl transferase                                    | [m]: coa + odecrn -> crn + odecoa                                                    |          | Carnitine shuttle                                      | 1376.1                                                       |
| C181CRNt     | C181 transport into the mitochondria                                  | odecrn[c] -> odecrn[m]                                                               |          | Carnitine shuttle                                      | 788.1                                                        |
| C204CPT1     | carnitine C20:4 transferase                                           | [c]: arachdcoa + crn -> arachdcrn + coa                                              | 2.3.1.21 | Carnitine shuttle                                      | (1374.1 or 1375.1 or 1375.2 or 1375.3 or 1375.4 or 126129.1) |
| C204CPT2     | arachidonic acid transport into the mitochondria                      | [m]: arachdcrn + coa -> arachdcoa + crn                                              |          | Carnitine shuttle                                      | 1376.1                                                       |
| C204CRNt     | arachidonic acid transport into the mitochondria                      | arachdcrn[c] -> arachdcrn[m]                                                         |          | Carnitine shuttle                                      |                                                              |
| C226COAtx    | fatty acid intracellular transport                                    | c226coa[c] <=> c226coa[x]                                                            |          | Transport, Peroxisomal                                 |                                                              |
| C226CPT1     | carnitine C22:6 transferase                                           | [c]: c226coa + crn -> c226crn + coa                                                  | 2.3.1.21 | Carnitine shuttle                                      | (1374.1 or 1375.1 or 1375.2 or 1375.3 or 1375.4 or 126129.1) |
| C226CPT2     | C226 transport into the mitochondria                                  | [m]: c226crn + coa -> c226coa + crn                                                  |          | Carnitine shuttle                                      | 1376.1                                                       |
| C226CRNt     | C226 transport into the mitochondria                                  | c226crn[c] -> c226crn[m]                                                             |          | Carnitine shuttle                                      |                                                              |
| C2M26DCOAhLm | cis-2-Methyl-5-isopropylhexa-2,5-dienyl-CoA hydrolyase (m)            | [m]: c2m26dcoa + h2o <=> 3h26dm5coa                                                  | 4.2.1.17 | Limonene and pinene degradation                        | (13030.1 and 3032.1) or 549.1)                               |
| C2M26DCOAhLx | cis-2-Methyl-5-isopropylhexa-2,5-dienyl-CoA hydrolyase (x)            | [x]: c2m26dcoa + h2o <=> 3h26dm5coa                                                  | 4.2.1.17 | Limonene and pinene degradation                        | (1891.1 or 1962.1)                                           |
| C3STDH1Pr    | C-3 sterol dehydrogenase (4-methylzymosterol)                         | [r]: 4mzym_int1 + nadp -> 4mzym_int2 + co2 + h + nadph                               | 5.3.3.1  | Cholesterol Metabolism                                 | 50814.1                                                      |

| Abbreviation | Reaction Name                                                 | Reaction                                                                     | E.C. #    | Pathway                                   | Gene association                                                               |
|--------------|---------------------------------------------------------------|------------------------------------------------------------------------------|-----------|-------------------------------------------|--------------------------------------------------------------------------------|
| C3STDH1r     | C-3 sterol dehydrogenase (4-methylzymosterol)                 | [r] : 4mzym_int1 + nad -> 4mzym_int2 + co2 + h + nadh                        | 5.3.3.1   | Cholesterol Metabolism                    | 50814.1                                                                        |
| C3STRK2r     | C-3 sterol keto reductase (zymosterol)                        | [r] : h + nadph + zym_int2 -> nadp + zymst                                   |           | Cholesterol Metabolism                    | 3295.1                                                                         |
| C4STMO1r     | C-4 sterol methyl oxidase (4,4-dimethylzymosterol)            | [r] : 44mzym + (3) h + (3) nadph + (3) o2 -> 4mzym_int1 + (4) h2o + (3) nadp |           | Cholesterol Metabolism                    | 6307.1                                                                         |
| C4STMO2Pr    | C-4 methyl sterol oxidase                                     | [r] : 4mzym_int2 + nadp + o2 -> co2 + h + nadph + zym_int2                   |           | Cholesterol Metabolism                    | 50814.1                                                                        |
| C4STMO2r     | C-4 methyl sterol oxidase                                     | [r] : 4mzym_int2 + nad + o2 -> co2 + h + nadh + zym_int2                     |           | Cholesterol Metabolism                    | (6307.1 or 50814.1)                                                            |
| CAATPS       | Ca ATPase                                                     | atp[c] + (2) ca2[c] + h2o[c] -> adp[c] + (2) ca2[e] + h[e] + pi[c]           | 3.6.3.6   | Transport, Extracellular                  | (491.1 or 493.1 or 490.1 or 492.1)                                             |
| CAMPt        | cAMP transport (ATP-dependent)                                | atp[c] + camp[c] + h2o[c] -> adp[c] + camp[e] + h[e] + pi[c]                 |           | Transport, Extracellular                  | (10257.1 or 10057.1 or 10057.2)                                                |
| CAROr        | beta-carotene transport via diffusion                         | caro[c] <=> caro[c]                                                          |           | Transport, Extracellular                  |                                                                                |
| CARVEOLte    | xenobiotic transport                                          | carveol[c] <=> carveol[c]                                                    |           | Transport, Extracellular                  |                                                                                |
| CAT2p        | catalase A, peroxisomal (ethanol)                             | [x] : etoh + h2o2 -> acald + (2) h2o                                         | 1.11.1.6  | Glycolysis/Gluconeogenesis                | 847.1                                                                          |
| CAi7r        | calcium / sodium antiporter (1:3), reversible                 | ca2[c] + (3) na1[e] <=> ca2[e] + (3) na1[c]                                  |           | Transport, Extracellular                  | (6546.1 or 6543.1 or 6547.1 or 6547.2 or 6547.3 or 6547.4 or 6547.5 or 6547.6) |
| CATm         | catalase                                                      | [m] : (2) h2o2 -> (2) h2o + o2                                               | 1.11.1.6  | ROS Detoxification                        | 847.1                                                                          |
| CATp         | catalase A, peroxisomal                                       | [x] : (2) h2o2 -> (2) h2o + o2                                               | 1.11.1.6  | Miscellaneous                             | 847.1                                                                          |
| CBL2OR       | NADH:coB(II)alamin oxidoreductase                             | [c] : (2) aqcoB + h + nad -> (2) cbl2 + (2) h2o + nad                        |           | Vitamin B12 Metabolism                    |                                                                                |
| CBL2m        | Cob(II)alamin transport, mitochondrial                        | cbl2[c] -> cbl2[m]                                                           |           | Transport, Mitochondrial                  | 166785.1                                                                       |
| CBLATm       | cob(II)alamin adenosyltransferase, mitochondrial              | [m] : atp + cbl1 + h <=> adocbl + pppi                                       | 2.5.1.17  | Vitamin B12 Metabolism                    | 166785.1                                                                       |
| CBPPer       | Carbamoyl phosphate phosphotransferase, endoplasmic reticulum | [r] : cbp + glc-D + h -> co2 + g6p + nh4                                     |           | Glycolysis/Gluconeogenesis                | (2538.1 or 92579.1 or 57818.1)                                                 |
| CBPS         | carbamoyl-phosphate synthase (glutamine-hydrolysing)          | [c] : (2) atp + gln-L + h2o + hco3 -> (2) adp + cbp + glu-L + (2) h + pi     | 6.3.5.5   | Pyrimidine Biosynthesis                   | 790.1                                                                          |
| CBPSam       | carbamoyl-phosphate synthase (ammonia) (mitochondria)         | [m] : (2) atp + hco3 + nh4 -> (2) adp + cbp + (2) h + pi                     | 6.3.4.16  | Glutamate metabolism                      | (1373.1 or 1373.2)                                                             |
| CBPter       | carbamoyl phosphate transport, endoplasmic reticulum          | cbp[c] + pi[c] + ppi[c] <=> cbp[r] + pi[r] + ppi[r]                          |           | Transport, Endoplasmic Reticular          |                                                                                |
| CBR1         | Carbonyl reductase [NADPH] 1                                  | [c] : h + nadph + prostg1 -> nadp + prostge1                                 |           | Eicosanoid Metabolism                     | 873.1                                                                          |
| CBR2         | Carbonyl reductase [NADPH] 1                                  | [c] : h + nadph + prostge2 -> nadp + prostgf2                                |           | Eicosanoid Metabolism                     | 873.1                                                                          |
| CCA_D3t      | Calcitroic acid transport from cytosol                        | cca_d3[c] -> cca_d3[e]                                                       |           | Transport, Extracellular                  |                                                                                |
| CCA_D3tm     | Calcitroic acid transport from mitochondria                   | cca_d3[m] -> cca_d3[c]                                                       |           | Transport, Mitochondrial                  |                                                                                |
| CDIPTr       | phosphatidylinositol synthase (Homo sapiens)                  | [c] : cdpdag_hs + inost <=> cmp + h + pail_hs                                | 2.7.8.11  | Glycerophospholipid Metabolism            | (10423.2 or 10423.1)                                                           |
| CDPDAGtm     | intracellular transport                                       | cdpdag_hs[c] <=> cdpdag_hs[m]                                                |           | Transport, Mitochondrial                  |                                                                                |
| CDS          | phosphatidate cytidylyltransferase                            | [c] : ctp + h + pa_hs -> cdpdag_hs + ppi                                     | 2.7.7.41  | Glycerophospholipid Metabolism            | 1040.1                                                                         |
| CDSm         | phosphatidate cytidylyltransferase                            | [m] : ctp + h + pa_hs -> cdpdag_hs + ppi                                     | 2.7.7.41  | Glycerophospholipid Metabolism            | 8760.1                                                                         |
| CEPTC        | choline phosphotransferase                                    | [c] : cdpcol + dag_hs -> cmp + h + pcho_l_hs                                 |           | Glycerophospholipid Metabolism            | (10390.1 or 56994.1)                                                           |
| CEPTE        | ethanolamine phosphotransferase                               | [c] : cdpea + dag_hs -> cmp + h + pe_hs                                      |           | Glycerophospholipid Metabolism            | 10390.1                                                                        |
| CERK         | Ceramide kinase                                               | [c] : atp + crm_hs -> adp + crmp_hs + h                                      | 2.7.1.138 | Sphingolipid Metabolism                   | (64781.1 or 64781.2)                                                           |
| CERT1gt      | ceramide transport protein                                    | crm_hs[c] <=> crm_hs[g]                                                      |           | Transport, Golgi Apparatus                | 10087.1                                                                        |
| CERT1rt      | ceramide transport protein                                    | crm_hs[c] <=> crm_hs[r]                                                      |           | Transport, Endoplasmic Reticular          | 10087.1                                                                        |
| CERT2gt      | ceramide transport protein                                    | gluside_hs[c] <=> gluside_hs[g]                                              |           | Transport, Golgi Apparatus                | 10087.1                                                                        |
| CERT2rt      | ceramide transport protein                                    | gluside_hs[c] <=> gluside_hs[r]                                              |           | Transport, Endoplasmic Reticular          | 10087.1                                                                        |
| CGLY3(2)     | Cys-Gly transport in via proton symport                       | cgly[e] + (2) h[e] -> cgly[c] + (2) h[c]                                     |           | Transport, Extracellular                  | 6565.1                                                                         |
| CGMPt        | cGMP transport (ATP-dependent)                                | 35cgmp[c] + atp[c] + h2o[c] -> 35cgmp[e] + adp[c] + h[c] + pi[c]             |           | Transport, Extracellular                  | (10257.1 or 10057.1 or 10057.2)                                                |
| CH25H        | cholesterol 25-hydroxylase                                    | [r] : chsterol + h + nadph + o2 -> h2o + nadp + xol25oh                      |           | Bile Acid Biosynthesis                    | 9023.1                                                                         |
| CHAT         | Choline O-acetyltransferase                                   | [c] : accoa + chol <=> ach + coa                                             |           | Glycerophospholipid Metabolism            | (1103.2 or 1103.1 or 1103.3 or 1103.4)                                         |
| CHATn        | Choline O-acetyltransferase                                   | [n] : accoa + chol <=> ach + coa                                             |           | Glycerophospholipid Metabolism            | (1103.1 or 1103.2 or 1103.3 or 1103.4)                                         |
| CHLP         | choline phosphate phosphatase                                 | [c] : cholp + h2o -> chol + pi                                               | 2.7.7.15  | Glycerophospholipid Metabolism            | 162466.1                                                                       |
| CHLPCTD      | choline phosphate cytidylyltransferase                        | [c] : cholp + ctp + h -> cdpcol + ppi                                        | 2.7.7.15  | Glycerophospholipid Metabolism            | (5130.1 or 9468.1)                                                             |
| CHLm         | choline transport via diffusion (cytosol to mitochondria)     | chol[c] <=> chol[m]                                                          |           | Transport, Mitochondrial                  |                                                                                |
| CHOLATEt     | cholate transport via bicarbonate countertransport            | cholate[e] + hco3[c] <=> cholate[c] + hco3[e]                                |           | Transport, Extracellular                  | (6579.1 or 10599.1)                                                            |
| CHOLATEt2    | cholate transport via sodium cotransport                      | cholate[e] + (2) na1[e] -> cholate[c] + (2) na1[c]                           |           | Transport, Extracellular                  | (6554.1 or 6555.1)                                                             |
| CHOLATEt3    | ABC bile acid transporter                                     | atp[c] + cholate[c] + h2o[c] -> adp[c] + cholate[e] + h[c] + pi[c]           |           | Transport, Extracellular                  | (8647.1 or 8714.1 or 8714.2 or 8714.3)                                         |
| CHOLD2m      | choline dehydrogenase (FAD acceptor), mitochondrial           | [m] : chol + fad -> betald + fadh2                                           |           | Glycine, Serine, and Threonine Metabolism | 55349.1                                                                        |
| CHOLK        | Choline kinase                                                | [c] : atp + chol -> adp + cholp + h                                          | 2.7.1.32  | Glycerophospholipid Metabolism            | (1119.1 or 1119.2 or 1120.1 or 1120.2)                                         |
| CHOLPg       | choline phosphate intracellular transport                     | cholp[c] <=> cholp[g]                                                        |           | Transport, Golgi Apparatus                |                                                                                |
| CHOLPi       | choline phosphate intracellular transport                     | cholp[c] <=> cholp[l]                                                        |           | Transport, Lysosomal                      |                                                                                |
| CHOL4        | choline, sodium cotransport                                   | chol[e] + na1[e] <=> chol[c] + na1[c]                                        |           | Transport, Extracellular                  | 60482.1                                                                        |
| CHOLg        | choline intracellular transport                               | chol[g] <=> chol[c]                                                          |           | Transport, Golgi Apparatus                |                                                                                |
| CHOLn        | Choline transport, nuclear through pores                      | chol[c] <=> chol[n]                                                          |           | Transport, Nuclear                        |                                                                                |
| CHOLtr       | choline intracellular transport                               | chol[r] <=> chol[c]                                                          |           | Transport, Endoplasmic Reticular          |                                                                                |
| CHOLu        | Choline uniport                                               | chol[e] <=> chol[c]                                                          |           | Transport, Extracellular                  | (6582.1 or 6582.2 or 6584.1)                                                   |
| CHSTEROLSULT | steroid sulfotransferase                                      | [c] : chsterol + paps -> chsterols + h + pap                                 | 2.8.2.2   | Steroid Metabolism                        | 6820.1                                                                         |
| CHSTEROLt    | cholesterol efflux (ATP depedent)                             | atp[c] + chsterol[c] + h2o[c] -> adp[c] + chsterol[e] + h[c] + pi[c]         |           | Transport, Extracellular                  | 19.1                                                                           |
| CHSTEROLt1   | cholesterol intracellular transport                           | chsterol[l] <=> chsterol[m]                                                  |           | Transport, Mitochondrial                  | 10948.1                                                                        |
| CHSTEROLt2   | cholesterol intracellular transport                           | chsterol[r] <=> chsterol[m]                                                  |           | Transport, Mitochondrial                  |                                                                                |
| CHSTEROLt3   | cholesterol intracellular transport                           | chsterol[c] <=> chsterol[m]                                                  |           | Transport, Mitochondrial                  |                                                                                |
| CHSTEROLg    | cholesterol efflux (ATP depedent), golgi                      | atp[c] + chsterol[g] + h2o[c] -> adp[c] + chsterol[e] + h[c] + pi[c]         |           | Transport, Golgi Apparatus                | 19.1                                                                           |
| CHTNASE      | chitinase                                                     | [c] : chtn + (2) h2o -> (3) acgam                                            | 3.2.1.14  | Aminosugar Metabolism                     | (27159.1 or 1118.1 or 54682.1)                                                 |
| CHTNASEe     | chitinase, extracellular                                      | [e] : chtn + (2) h2o -> (3) acgam                                            | 3.2.1.14  | Aminosugar Metabolism                     | 27159.2                                                                        |
| CITL         | Citrate lyase                                                 | [c] : cit -> ac + oaa                                                        | 4.1.3.6   | Citric Acid Cycle                         | (171425.1 or 171425.2)                                                         |
| CITMCOAHm    | L-Citramaly-CoA hydro-lyase, mitochondrial                    | [m] : h2o + itaccoa <=> citmcoa-L                                            | 4.2.1.56  | C5-Branched dibasic acid metabolism       |                                                                                |

| Abbreviation | Reaction Name                                                        | Reaction                                                    | E.C. #    | Pathway                             | Gene association                                                                         |
|--------------|----------------------------------------------------------------------|-------------------------------------------------------------|-----------|-------------------------------------|------------------------------------------------------------------------------------------|
| CITMCOALm    | L-Citramallyl-CoA pyruvate-lyase                                     | [m] : citmcoa-L -> accoa + pyr                              | 4.1.3.25  | CS-Branched dibasic acid metabolism |                                                                                          |
| CITRtm       | citruiline mitochondrial transport via proton antiport               | citrl-L[m] <=> citr-L[c]                                    |           | Transport, Mitochondrial            | ( 83884.1 or 10166.1 )                                                                   |
| CITV4_2      | citrate transport via sodium symport                                 | cit[e] + (2) na1[e] <=> cit[c] + (2) na1[c]                 |           | Transport, Extracellular            | 9058.1                                                                                   |
| CITV4_4      | citrate transport via sodium symport                                 | cit[e] + (4) na1[e] <=> cit[c] + (4) na1[c]                 |           | Transport, Extracellular            | 284111.1                                                                                 |
| CITtm        | citrate transport, mitochondrial                                     | cit[c] + mal-L[m] <=> cit[m] + mal-L[c]                     |           | Transport, Mitochondrial            | 6576.1                                                                                   |
| CITtm        | citrate transport, mitochondrial                                     | cit[c] + pep[m] <=> cit[m] + pep[c]                         |           | Transport, Mitochondrial            | 6576.1                                                                                   |
| CK           | ATP Creatine kinase                                                  | [m] : atp + creat <=> adp + pcreat                          | 2.7.3.2   | Urea cycle/amino group metabolism   | ( 1159.1 or 1160.1 )                                                                     |
| CKc          | ATP Creatine kinase (c)                                              | [c] : atp + creat <=> adp + pcreat                          | 2.7.3.2   | Urea cycle/amino group metabolism   | ( 1152.1 or 1158.1 or ( 1158.1 and 1152.1 ) )                                            |
| CLFORtex     | chloride transport via formate countertransport                      | cl[e] + (2) for[c] -> cl[c] + (2) for[e]                    |           | Transport, Extracellular            | 5172.1                                                                                   |
| CLFORtex2    | chloride transport via formate countertransport (2:1)                | (2) cl[e] + for[c] -> (2) cl[c] + for[e]                    |           | Transport, Extracellular            | ( 65010.1 or 65010.2 or 65010.3 )                                                        |
| CLHCO3tex2   | chloride transport via bicarbonate countertransport (2:1)            | (2) cl[e] + hco3[c] -> (2) cl[c] + hco3[e]                  |           | Transport, Extracellular            | ( 65010.1 or 65010.2 or 65010.3 )                                                        |
| CLHCOtex     | chloride transport via bicarbonate countertransport                  | cl[e] + (2) hco3[c] -> cl[c] + (2) hco3[e]                  |           | Transport, Extracellular            | ( 1836.1 or 1811.1 or 5172.1 or 11511.1 or 11511.2 or 116369.2 or 115019.1 or 115019.2 ) |
| CLI2tex      | chloride transport via iodide countertransport                       | cl[e] + (2) i[c] -> cl[c] + (2) i[e]                        |           | Transport, Extracellular            | 5172.1                                                                                   |
| CLOHtex2     | chloride transport via hydroxide countertransport (2:1)              | (2) cl[e] + oh1[c] -> (2) cl[c] + oh1[e]                    |           | Transport, Extracellular            | ( 65010.1 or 65010.2 or 65010.3 )                                                        |
| CLOXAtex2    | chloride transport via oxalate countertransport (2:1)                | (2) cl[e] + oxa[c] -> (2) cl[c] + oxa[e]                    |           | Transport, Extracellular            | ( 65010.1 or 65010.2 or 65010.3 )                                                        |
| CLPNDCOAtx   | fatty acid intracellular transport                                   | clpndcoa[c] <=> clpndcoa[x]                                 |           | Transport, Peroxisomal              |                                                                                          |
| CLPNDcpt1    | carnitine O-palmitoyltransferase                                     | [c] : clpndcoa + crn -> clpndcrn + coa                      | 2.3.1.21  | Carnitine shuttle                   | ( 1375.4 or 1374.1 or 126129.1 or 1375.3 or 1375.2 or 1375.1 )                           |
| CLPNDcpt2    | carnitine transferase                                                | [m] : clpndcrn + coa -> clpndcoa + crn                      |           | Carnitine shuttle                   | 1376.1                                                                                   |
| CLPNDCRNt    | transport into the mitochondria (carnitine)                          | clpndcrn[c] -> clpndcrn[m]                                  |           | Carnitine shuttle                   | 788.1                                                                                    |
| CLPNDt       | fatty acid transport via diffusion                                   | clpnd[e] <=> clpnd[c]                                       |           | Transport, Extracellular            |                                                                                          |
| CLS_hs       | cardiolipin synthase (homo sapiens)                                  | [c] : cdpdag_hs + glycy_hs -> clpn_hs + cmp + h             |           | Glycerophospholipid Metabolism      | 54675.1                                                                                  |
| CMPCACNAg    | CMP-Sia Golgi transport via CMP antiport                             | cmpl[g] + cmpacna[c] <=> cmpl[c] + cmpacna[g]               |           | Transport, Golgi Apparatus          | 10559.1                                                                                  |
| CMPCACNAm    | CMP-Sia nuclear export                                               | cmpacna[n] -> cmpacna[c]                                    |           | Transport, Nuclear                  |                                                                                          |
| CMPSAS       | CMP sialic acid synthase                                             | [c] : acnam + ctp -> cmpacna + ppi                          | 2.7.7.43  | Aminosugar Metabolism               | 55907.1                                                                                  |
| CMPSASn      | CMP sialic acid synthase, nuclear                                    | [n] : acnam + ctp -> cmpacna + ppi                          | 2.7.7.43  | Aminosugar Metabolism               | 55907.1                                                                                  |
| CO2t         | CO2 transporter via diffusion                                        | co2[e] <=> co2[c]                                           |           | Transport, Extracellular            |                                                                                          |
| CO2ter       | CO2 endoplasmic reticular transport via diffusion                    | co2[c] <=> co2[r]                                           |           | Transport, Endoplasmic Reticular    |                                                                                          |
| CO2tg        | CO2 Golgi transport                                                  | co2[c] <=> co2[g]                                           |           | Transport, Golgi Apparatus          |                                                                                          |
| CO2tm        | CO2 transport (diffusion), mitochondrial                             | co2[c] <=> co2[m]                                           |           | Transport, Mitochondrial            |                                                                                          |
| CO2m         | CO2 nuclear transport via diffusion                                  | co2[m] <=> co2[c]                                           |           | Transport, Nuclear                  |                                                                                          |
| CO2tp        | CO2 peroxisomal transport                                            | co2[c] <=> co2[x]                                           |           | Transport, Peroxisomal              |                                                                                          |
| COAtl        | CoA transport in lysosome via diffusion                              | coa[c] <=> coa[l]                                           |           | Transport, Lysosomal                |                                                                                          |
| COAm         | CoA transporter                                                      | coa[c] <=> coa[m]                                           |           | Transport, Mitochondrial            | 8034.1                                                                                   |
| COAn         | coenzyme A transport, nuclear                                        | coa[c] <=> coa[n]                                           |           | Transport, Nuclear                  |                                                                                          |
| COAp         | coenzyme A transport, peroxisomal                                    | coa[c] <=> coa[x]                                           |           | Transport, Peroxisomal              |                                                                                          |
| COAr         | COA transporter, endoplasmic reticulum                               | coa[c] <=> coa[r]                                           |           | Transport, Endoplasmic Reticular    |                                                                                          |
| COKECBESr    | Carboxylesterase (cocaine) (er)                                      | [r] : coke + h2o -> bz + egme + h                           | 3.1.1.1   | Alkaloid biosynthesis II            | 8824.1                                                                                   |
| COQ3m        | methyltransferase COQ3                                               | [m] : 2dpmhobq + amet -> ahcys + h + q10                    |           | Ubiquinone Biosynthesis             | 51805.1                                                                                  |
| COQ5m        | Ubiquinone biosynthesis methyltransferase COQ5                       | [m] : 2dpmhobq + amet -> 2dpmhobq_me + ahcys + h            |           | Ubiquinone Biosynthesis             |                                                                                          |
| COQ6m        | Ubiquinone biosynthesis monooxygenase COQ6                           | [m] : 2dpm6me + o2 -> 2dpmhobq + h2o                        |           | Ubiquinone Biosynthesis             | ( 51004.1 or 51004.2 )                                                                   |
| COQ7m        | Ubiquinone biosynthesis COQ7                                         | [m] : 2dpmhobq_me + h + nadph + o2 -> 2dpmhobq + h2o + nadp |           | Ubiquinone Biosynthesis             | 10229.1                                                                                  |
| CORE2GTg     | Core 2 acetylglucosaminyltransferase, Golgi apparatus                | [g] : Tn_antigen + uacgam -> core2 + h + udp                | 2.4.1.102 | O-Glycan Biosynthesis               | ( 2650.1 or 9245.1 or 51301.1 )                                                          |
| CORE3GTg     | Core 3 beta-GlcNAc-transferase, Golgi apparatus                      | [g] : Tn_antigen + uacgam -> core3 + h + udp                | 2.4.1.147 | O-Glycan Biosynthesis               | 192134.1                                                                                 |
| CORE4GTg     | Core 4 beta6-GalNAc-transferase, Golgi apparatus                     | [g] : core3 + uacgam -> core4 + h + udp                     | 2.4.1.148 | O-Glycan Biosynthesis               | 9245.1                                                                                   |
| CORE5GTg     | Core 5 alpha-GalNAc-transferase, Golgi apparatus                     | [g] : Tn_antigen + udpagal -> core5 + h + udp               |           | O-Glycan Biosynthesis               |                                                                                          |
| CORE6GTg     | Core 6 beta-GlcNAc-transferase A, Golgi apparatus                    | [g] : Tn_antigen + uacgam -> core6 + h + udp                | 2.4.1.102 | O-Glycan Biosynthesis               | 2650.1                                                                                   |
| CORE7GTg     | Core 7 alpha-GalNAc-transferase, Golgi apparatus                     | [g] : Tn_antigen + udpagal -> core7 + h + udp               |           | O-Glycan Biosynthesis               |                                                                                          |
| CORE8GTg     | N-acetylgalactosamine 3-alpha-galactosyltransferase, Golgi apparatus | [g] : Tn_antigen + udpgal -> core8 + h + udp                |           | O-Glycan Biosynthesis               |                                                                                          |
| COt          | CO transporter via diffusion                                         | co[c] <=> co[e]                                             |           | Transport, Extracellular            |                                                                                          |
| COUCOAFm     | p-coumaroyl-CoA formation                                            | [m] : T4hcimm + atp + coa -> amp + coucoa + ppi             |           | Ubiquinone Biosynthesis             |                                                                                          |
| COUMARINte   | xenobiotic transport                                                 | coumarin[e] <=> coumarin[c]                                 |           | Transport, Extracellular            |                                                                                          |
| CPCTDTX      | choline-phosphate cytidylyltransferase                               | [c] : ctp + h + ntm2amep -> cmpntm2amep + ppi               | 2.7.7.15  | Glycerophospholipid Metabolism      | ( 9468.1 or 5130.1 )                                                                     |
| CPPPGO       | coproporphyrinogen oxidase (O2 required)                             | [c] : cpppg3 + (2) h + o2 -> (2) co2 + (2) h2o + pppg9      | 1.3.3.3   | Heme Biosynthesis                   | 1371.1                                                                                   |
| CREATt4(2)r  | Creatine transport (sodium symport) (2:1)                            | creat[e] + (2) na1[e] <=> creat[c] + (2) na1[c]             |           | Transport, Extracellular            | ( 6535.1 or 6537.1 )                                                                     |
| CREATtmdiffr | Creatine transport to/from mitochondria via diffusion                | creat[c] -> creat[m]                                        |           | Urea cycle/amino group metabolism   |                                                                                          |
| CRMPte       | crmp_hs transport                                                    | crmp_hs[c] <=> crmp_hs[e]                                   |           | Transport, Extracellular            |                                                                                          |
| CRNCAR3tp    | carnitine-propcarnitine carrier, peroxisomal                         | crn[c] + pcn[x] -> crn[x] + pcn[c]                          |           | Transport, Peroxisomal              |                                                                                          |
| CRNCARtp     | carnitine-acetylcarnitine carrier, peroxisomal                       | acrn[x] + crn[c] -> acrn[c] + crn[x]                        |           | Transport, Peroxisomal              |                                                                                          |
| CRNt         | L-carnitine reversible transport                                     | crn[c] <=> crn[e]                                           |           | Transport, Extracellular            | 6584.1                                                                                   |
| CRNHa        | L-carnitine outward transport (H+ antiport)                          | crn[c] + h[e] -> crn[e] + h[c]                              |           | Transport, Extracellular            | 6583.1                                                                                   |
| CRNtm        | L-carnitine transport out of mitochondria via diffusion              | crn[m] -> crn[c]                                            |           | Transport, Mitochondrial            | 788.1                                                                                    |
| CRNtuR       | L-carnitine inward uniport                                           | crn[e] -> crn[c]                                            |           | Transport, Extracellular            | 6583.1                                                                                   |
| CRNtuNa      | L-carnitine inward transport by Na+ symport                          | crn[e] + na1[e] -> crn[c] + na1[c]                          |           | Transport, Extracellular            | 6584.1                                                                                   |



| Abbreviation | Reaction Name                                                    | Reaction                                                                                      | E.C. #   | Pathway                            | Gene association                                                                                                                                                                                                                         |
|--------------|------------------------------------------------------------------|-----------------------------------------------------------------------------------------------|----------|------------------------------------|------------------------------------------------------------------------------------------------------------------------------------------------------------------------------------------------------------------------------------------|
| CRNx         | carnitine transport peroxisome to mitochondria                   | dmnncrn[x] <=> dmnncrn[m]                                                                     |          | Transport, Peroxisomal             |                                                                                                                                                                                                                                          |
| CRTNsyn      | Creatinine synthase                                              | [c] : pcreat -> crtn + h + pi                                                                 |          | Urea cycle/amino group metabolism  |                                                                                                                                                                                                                                          |
| CRTSLtm      | cortisol intracellular transport                                 | crtsl[c] <=> crtsl[m]                                                                         |          | Transport, Mitochondrial           |                                                                                                                                                                                                                                          |
| CRTSLlr      | cortisol intracellular transport                                 | crtsl[c] <=> crtsl[r]                                                                         |          | Transport, Endoplasmic Reticular   |                                                                                                                                                                                                                                          |
| CRTSTRNtm    | corticosterone intracellular transport                           | crstrm[c] <=> crstrm[m]                                                                       |          | Transport, Mitochondrial           |                                                                                                                                                                                                                                          |
| CRTSTRNlr    | corticosterone intracellular transport                           | crstrm[c] <=> crstrm[r]                                                                       |          | Transport, Endoplasmic Reticular   |                                                                                                                                                                                                                                          |
| CRVNCtr      | fatty acid transport via diffusion                               | crvnc[e] <=> crvnc[c]                                                                         |          | Transport, Extracellular           |                                                                                                                                                                                                                                          |
| CSAPASEly    | chondroitin sulfate A proteoglycan protease, lysosome (endosome) | [l] : cspg_a + h2o -> Ser-Gly/Ala-X-Gly + cs_a                                                |          | Chondroitin sulfate degradation    |                                                                                                                                                                                                                                          |
| CSBPASEly    | chondroitin sulfate B proteoglycan protease, lysosome (endosome) | [l] : cspg_b + h2o -> Ser-Gly/Ala-X-Gly + cs_b                                                |          | Chondroitin sulfate degradation    |                                                                                                                                                                                                                                          |
| CSPASEly     | chondroitin sulfate C proteoglycan protease, lysosome (endosome) | [l] : cspg_c + h2o -> Ser-Gly/Ala-X-Gly + cs_c                                                |          | Chondroitin sulfate degradation    |                                                                                                                                                                                                                                          |
| CSDPASEly    | chondroitin sulfate D proteoglycan protease, lysosome (endosome) | [l] : cspg_d + h2o -> Ser-Gly/Ala-X-Gly + cs_d                                                |          | Chondroitin sulfate degradation    |                                                                                                                                                                                                                                          |
| CSEPASEly    | chondroitin sulfate E proteoglycan protease, lysosome (endosome) | [l] : cspg_e + h2o -> Ser-Gly/Ala-X-Gly + cs_e                                                |          | Chondroitin sulfate degradation    |                                                                                                                                                                                                                                          |
| C5m          | citrate synthase                                                 | [m] : accoa + h2o + oaa -> cit + coa + h                                                      |          | Citric Acid Cycle                  | ( 1431.1 or 1431.2 )                                                                                                                                                                                                                     |
| CSNAT2m      | carnitine O-acetyltransferase, mitochondrial                     | [m] : coa + pcn <=> crn + ppcoa                                                               | 2.3.1.7  | Carnitine shuttle                  | 1384.1                                                                                                                                                                                                                                   |
| CSNAT2x      | carnitine dimethyl nonanoyl transferase, reversible, peroxisomal | [x] : crn + dmnncoa <=> coa + dmnncrn                                                         | 2.3.1.7  | Fatty Acid Metabolism              | ( 54677.1 or 1384.2 )                                                                                                                                                                                                                    |
| CSNAT3x      | carnitine O-acetyltransferase, peroxisomal                       | [x] : crn + ppcoa <=> coa + pcn                                                               | 2.3.1.7  | Carnitine shuttle                  | 1384.2                                                                                                                                                                                                                                   |
| CSNATer      | carnitine O-acetyltransferase, endoplasmic reticulum             | [r] : accoa + crn <=> acrn + coa                                                              | 2.3.1.7  | Fatty Acid Metabolism              | 1384.3                                                                                                                                                                                                                                   |
| CSNATm       | carnitine O-acetyltransferase, mitochondrial                     | [m] : acrn + coa <=> accoa + crn                                                              | 2.3.1.7  | Fatty Acid Metabolism              | 1384.1                                                                                                                                                                                                                                   |
| CSNATp       | carnitine O-acetyltransferase, reverse direction, peroxisomal    | [x] : accoa + crn <=> acrn + coa                                                              | 2.3.1.7  | Fatty Acid Metabolism              | 1384.2                                                                                                                                                                                                                                   |
| CSNATr       | carnitine O-acetyltransferase                                    | [e] : accoa + crn <=> acrn + coa                                                              | 2.3.1.7  | Carnitine shuttle                  |                                                                                                                                                                                                                                          |
| CSND         | Cytosine deaminase                                               | [c] : csn + h + h2o -> nh4 + ura                                                              | 3.5.4.1  | Pyrimidine Catabolism              |                                                                                                                                                                                                                                          |
| CSNt         | cytosine transport via facilitated diffusion                     | csn[e] <=> csn[c]                                                                             |          | Transport, Extracellular           | 3177.1                                                                                                                                                                                                                                   |
| CSPG_At      | chondroitin sulfate A transport, golgi to extracellular          | cspg_a[g] -> cspg_a[e]                                                                        |          | Transport, Extracellular           |                                                                                                                                                                                                                                          |
| CSPG_Atly    | chondroitin sulfate A transport, extracellular to lysosome       | cspg_a[e] -> cspg_a[l]                                                                        |          | Transport, Lysosomal               |                                                                                                                                                                                                                                          |
| CSPG_Bt      | chondroitin sulfate B transport, golgi to extracellular          | cspg_b[g] -> cspg_b[e]                                                                        |          | Transport, Extracellular           |                                                                                                                                                                                                                                          |
| CSPG_Btly    | chondroitin sulfate B transport, extracellular to lysosome       | cspg_b[e] -> cspg_b[l]                                                                        |          | Transport, Lysosomal               |                                                                                                                                                                                                                                          |
| CSPG_Ct      | chondroitin sulfate C transport, golgi to extracellular          | cspg_c[g] -> cspg_c[e]                                                                        |          | Transport, Extracellular           |                                                                                                                                                                                                                                          |
| CSPG_Ctly    | chondroitin sulfate C transport, extracellular to lysosome       | cspg_c[e] -> cspg_c[l]                                                                        |          | Transport, Lysosomal               |                                                                                                                                                                                                                                          |
| CSPG_Dt      | chondroitin sulfate D transport, golgi to extracellular          | cspg_d[g] -> cspg_d[e]                                                                        |          | Transport, Extracellular           |                                                                                                                                                                                                                                          |
| CSPG_Dtly    | chondroitin sulfate D transport, extracellular to lysosome       | cspg_d[e] -> cspg_d[l]                                                                        |          | Transport, Lysosomal               |                                                                                                                                                                                                                                          |
| CSPG_Et      | chondroitin sulfate E transport, golgi to extracellular          | cspg_e[g] -> cspg_e[e]                                                                        |          | Transport, Extracellular           |                                                                                                                                                                                                                                          |
| CSPG_Etly    | chondroitin sulfate E transport, extracellular to lysosome       | cspg_e[e] -> cspg_e[l]                                                                        |          | Transport, Lysosomal               |                                                                                                                                                                                                                                          |
| CTPS1        | CTP synthase (NH3)                                               | [c] : atp + nh4 + utp -> adp + ctp + (2) h + pi                                               | 6.3.4.2  | Nucleotides                        | 1503.1                                                                                                                                                                                                                                   |
| CTPS2        | CTP synthase (glutamine)                                         | [c] : atp + gln-L + h2o -> adp + ctp + glu-L + (2) h + pi                                     | 6.3.4.2  | Pyrimidine Biosynthesis            | ( 56474.1 or 56474.2 )                                                                                                                                                                                                                   |
| CTPtn        | CTP diffusion in nucleus                                         | ctp[c] <=> ctp[n]                                                                             |          | Transport, Nuclear                 |                                                                                                                                                                                                                                          |
| CYANSTm      | Cyanide sulfurtransferase, mitochondrial                         | [m] : cyan + tsul -> h + so3 + teynt                                                          | 2.8.1.1  | Cysteine Metabolism                | 7263.1                                                                                                                                                                                                                                   |
| CYANt        | Cyanide transport via diffusion (extracellular to cytosol)       | cyan[e] <=> cyan[c]                                                                           |          | Transport, Extracellular           |                                                                                                                                                                                                                                          |
| CYANtm       | Cyanide transport via diffusion (mitochondrial)                  | cyan[c] <=> cyan[m]                                                                           |          | Transport, Mitochondrial           |                                                                                                                                                                                                                                          |
| CYOOm3       | cytochrome c oxidase, mitochondrial Complex IV                   | (4) focyC[m] + (7.92) h[m] + o2[m] -> (4) ficyC[m] + (4) h[c] + (1.96) h2o[m] + (0.02) o2s[m] | 1.9.3.1  | Oxidative Phosphorylation          | ( 9377.1 and 1347.1 and 84701.1 and 125965.1 and 1337.1 and 1350.1 and 1340.1 and 1351.1 and 1349.1 and 1327.1 and 1345.1 and 341947.1 and 1339.1 and 1346.1 and 4512.1 and 170712.1 and 9167.1 and 4514.1 and 4513.1 and 1329.1 )       |
| CYOR-u10m    | ubiquinol-6 cytochrome c reductase, Complex III                  | (2) ficyC[m] + (2) h[m] + q10h2[m] -> (2) focyC[m] + (4) h[c] + q10[m]                        | 1.10.2.2 | Oxidative Phosphorylation          | ( ( 7385.1 and 7388.1 and 7384.1 and 29796.2 and 7386.1 and 7381.1 and 10975.1 and 1537.1 and 27089.1 and 4519.1 ) or ( 7385.1 and 7388.1 and 4519.1 and 7381.1 and 1537.1 and 10975.1 and 7384.1 and 7386.1 and 29796.1 and 27089.1 ) ) |
| CYSALANaEx   | L-alanine/L-cysteine Na-dependent exchange (Cys-L in)            | ala-L[e] + cys-L[e] + na1[e] -> ala-L[e] + cys-L[e] + na1[e]                                  |          | Transport, Extracellular           | ( 6509.1 or 6510.1 )                                                                                                                                                                                                                     |
| CYSAMO       | Cysteamine oxygenase                                             | [c] : cysam + o2 -> (2) h + hypaur                                                            |          | Taurine and hypotaurine metabolism |                                                                                                                                                                                                                                          |
| CYSASNaEx    | L-cysteine/L-asparagine Na-dependent exchange (Cys L in)         | asn-L[e] + cys-L[e] + na1[e] -> asn-L[e] + cys-L[e] + na1[e]                                  |          | Transport, Extracellular           | 6510.1                                                                                                                                                                                                                                   |
| CYSGLNNaEx   | L-cysteine/L-glutamine Na-dependent exchange (Cys L in)          | cys-L[e] + gln-L[e] + na1[e] -> cys-L[e] + gln-L[e] + na1[e]                                  |          | Transport, Extracellular           | 6510.1                                                                                                                                                                                                                                   |
| CYSGLTH      | Glutathione:cystine oxidoreductase                               | [c] : Lcystin + (2) gthrd <=> (2) cys-L + gthox                                               | 1.8.4.4  | Cysteine Metabolism                |                                                                                                                                                                                                                                          |
| CYSGLUexR    | L-cysteine/L-glutamine reversible exchanger                      | cys-L[e] + gln-L[e] <=> cys-L[e] + gln-L[e]                                                   |          | Transport, Extracellular           | ( 56301.1 and 6520.1 )                                                                                                                                                                                                                   |

| Abbreviation | Reaction Name                                                   | Reaction                                                    | E.C. #     | Pathway                            | Gene association                                                                                                                                            |
|--------------|-----------------------------------------------------------------|-------------------------------------------------------------|------------|------------------------------------|-------------------------------------------------------------------------------------------------------------------------------------------------------------|
| CYSGLYex     | L-cysteine/glycine exchanger                                    | cys-L[e] + gly[e] --> cys-L[e] + gly[c]                     |            | Transport, Extracellular           | ( ( 6520.1 and 23428.1 ) or ( 23428.2 and 6520.1 ) )                                                                                                        |
| CYSGLYexR    | L-cysteine/glycine reversible exchanger                         | cys-L[e] + gly[e] <=> cys-L[e] + gly[c]                     |            | Transport, Extracellular           | ( 6520.1 and 56301.1 )                                                                                                                                      |
| CYSLYSL      | L-Cysteine Lysteine-lyase (deaminating)                         | [c] : Lcystin + h2o --> nh4 + pyr + theys                   | 4.4.1.1    | Cysteine Metabolism                |                                                                                                                                                             |
| CYSO         | cysteine oxidase                                                | [c] : cys-L + o2 --> 3sala + (2) h                          | 1.13.11.20 | Taurine and hypotaurine metabolism | 1036.1                                                                                                                                                      |
| CYSSERNaEx   | L-serine/L-cysteine Na-dependent exchange (Cys-L in)            | cys-L[e] + na[e] + ser-L[c] --> cys-L[c] + na[e] + ser-L[e] |            | Transport, Extracellular           | ( 6509.1 or 6510.1 )                                                                                                                                        |
| CYS4         | L-cysteine reversible transport via sodium symport              | cys-L[e] + na[e] --> cys-L[c] + na[c]                       |            | Transport, Extracellular           | 11254.1                                                                                                                                                     |
| CYSTA        | cysteine transaminase                                           | [c] : akc + cys-L <=> glu-L + mercppyr                      | 2.6.1.3    | Cysteine Metabolism                | 2805.1                                                                                                                                                      |
| CYSTAm       | cysteine transaminase (mitochondrial)                           | [m] : akc + cys-L <=> glu-L + mercppyr                      | 2.6.1.3    | Cysteine Metabolism                | 2806.1                                                                                                                                                      |
| CYStec       | L-cysteine transport via diffusion (extracellular to cytosol)   | cys-L[e] <=> cys-L[c]                                       |            | Transport, Extracellular           | 124935.1                                                                                                                                                    |
| CYSTGL       | cystathionine g-lyase                                           | [c] : cyst-L + h2o --> 2obut + cys-L + nh4                  | 4.4.1.1    | Cysteine Metabolism                | ( 1491.1 or 1491.2 )                                                                                                                                        |
| CYSTGLUex    | L-cystine/L-glutamate exchanger                                 | Lcystin[e] + glu-L[c] --> Lcystin[c] + glu-L[e]             |            | Transport, Extracellular           | ( 23657.1 and 6520.1 )                                                                                                                                      |
| CYSTHRNaEx   | L-cysteine/L-threonine Na-dependent exchange (Cys-L in)         | cys-L[e] + na[e] + thr-L[c] --> cys-L[c] + na[e] + thr-L[e] |            | Transport, Extracellular           | ( 6509.1 or 6510.1 )                                                                                                                                        |
| CYSTS        | cystathionine beta-synthase                                     | [c] : hcys-L + ser-L --> cyst-L + h2o                       | 4.2.1.22   | Methionine Metabolism              | 875.1                                                                                                                                                       |
| CYSTSERex    | L-cystine/glycine exchanger (cystine in)                        | Lcystin[e] + ser-L[c] --> Lcystin[c] + ser-L[e]             |            | Transport, Extracellular           | ( 6519.1 and 11136.1 )                                                                                                                                      |
| CYTD         | cytidine deaminase                                              | [c] : cytd + h + h2o --> nh4 + uri                          | 3.5.4.5    | Pyrimidine Catabolism              | ( 978.1 or 57379.1 )                                                                                                                                        |
| CYTDK1       | cytidine kinase (ATP)                                           | [c] : atp + cytd --> adp + cmp + h                          |            | Nucleotides                        | ( 7371.1 or 83549.1 )                                                                                                                                       |
| CYTDK2m      | cytidine kinase (ATP), mitochondrial                            | [m] : atp + cytd --> adp + cmp + h                          |            | Nucleotides                        |                                                                                                                                                             |
| CYTDn        | cytidine deaminase, nuclear                                     | [n] : cytd + h + h2o --> nh4 + uri                          | 3.5.4.5    | Nucleotides                        | 57379.1                                                                                                                                                     |
| CYTDi        | cytidine facilitated transport in cytosol                       | cytd[e] <=> cytd[c]                                         |            | Transport, Extracellular           | ( 3177.1 or 2030.1 )                                                                                                                                        |
| CYTD4        | cytidine transport in via sodium symport                        | cytd[e] + na[e] --> cytd[c] + na[c]                         |            | Transport, Extracellular           | ( 9154.1 or 64078.1 or 9154.2 )                                                                                                                             |
| CYTD5        | cytidine transport (1:2 Na/cytd cotransport)                    | cytd[e] + (2) na[e] --> cytd[c] + (2) na[c]                 |            | Transport, Extracellular           | 64078.1                                                                                                                                                     |
| CYTDl        | Cytidine facilitated transport from lysosome                    | cytd[l] <=> cytd[c]                                         |            | Transport, Lysosomal               | 55315.1                                                                                                                                                     |
| CYTDm        | cytidine facilitated transport in mitochondria                  | cytd[m] <=> cytd[n]                                         |            | Transport, Mitochondrial           | 2030.1                                                                                                                                                      |
| CYTDn        | cytidine transport in nucleus                                   | cytd[n] <=> cytd[m]                                         |            | Transport, Nuclear                 |                                                                                                                                                             |
| CYTK1        | cytidylate kinase (CMP)                                         | [c] : atp + cmp <=> adp + cdp                               | 2.7.4.14   | Nucleotides                        | 51727.1                                                                                                                                                     |
| CYTK10       | cytidylate kinase (CMP,dGTP)                                    | [c] : cmp + dgtg <=> cdp + dgdg                             | 2.7.4.14   | Nucleotides                        | 51727.1                                                                                                                                                     |
| CYTK10n      | cytidylate kinase (CMP,dGTP),nuclear                            | [n] : cmp + dgtg <=> cdp + dgdg                             | 2.7.4.14   | Nucleotides                        | 51727.1                                                                                                                                                     |
| CYTK11       | cytidylate kinase (dCMP,dGTP)                                   | [c] : dcmp + dgtg <=> dcdp + dgdg                           | 2.7.4.14   | Nucleotides                        | 51727.1                                                                                                                                                     |
| CYTK11n      | cytidylate kinase (dCMP,dGTP),nuclear                           | [n] : dcmp + dgtg <=> dcdp + dgdg                           | 2.7.4.14   | Nucleotides                        | 51727.1                                                                                                                                                     |
| CYTK12       | cytidylate kinase (dCMP,dCTP)                                   | [c] : dcmp + dctp <=> (2) dcdp                              | 2.7.4.14   | Nucleotides                        | 51727.1                                                                                                                                                     |
| CYTK12n      | cytidylate kinase (dCMP,dCTP),nuclear                           | [n] : dcmp + dctp <=> (2) dcdp                              | 2.7.4.14   | Nucleotides                        | 51727.1                                                                                                                                                     |
| CYTK13       | cytidylate kinase (dCMP,dATP)                                   | [c] : datp + dcmp <=> dadp + dcdp                           | 2.7.4.14   | Nucleotides                        | 51727.1                                                                                                                                                     |
| CYTK13n      | cytidylate kinase (dCMP,dATP),nuclear                           | [n] : datp + dcmp <=> dadp + dcdp                           | 2.7.4.14   | Nucleotides                        | 51727.1                                                                                                                                                     |
| CYTK14       | cytidylate kinase (dCMP,UTP)                                    | [c] : dcmp + utp <=> dcdp + udp                             | 2.7.4.14   | Nucleotides                        | 51727.1                                                                                                                                                     |
| CYTK14n      | cytidylate kinase (dCMP,CTP),nuclear                            | [n] : dcmp + utp <=> dcdp + udp                             | 2.7.4.14   | Nucleotides                        | 51727.1                                                                                                                                                     |
| CYTK1m       | cytidylate kinase (CMP),mitochondrial                           | [m] : atp + cmp <=> adp + cdp                               | 2.7.4.14   | Nucleotides                        |                                                                                                                                                             |
| CYTK1n       | cytidylate kinase (CMP),nuclear                                 | [n] : atp + cmp <=> adp + cdp                               | 2.7.4.14   | Nucleotides                        | 51727.1                                                                                                                                                     |
| CYTK2        | cytidylate kinase (dCMP)                                        | [c] : atp + dcmp <=> adp + dcdp                             | 2.7.4.14   | Nucleotides                        | 51727.1                                                                                                                                                     |
| CYTK2n       | cytidylate kinase (dCMP),nuclear                                | [n] : atp + dcmp <=> adp + dcdp                             | 2.7.4.14   | Nucleotides                        | 51727.1                                                                                                                                                     |
| CYTK3        | cytidylate kinase (CMP),GTP                                     | [c] : cmp + gtp <=> cdp + gdp                               |            | Nucleotides                        | ( 26289.1 or 26289.2 )                                                                                                                                      |
| CYTK3n       | cytidylate kinase (dCMP,CTP),nuclear                            | [n] : ctp + dcmp <=> cdp + dcdp                             | 2.7.4.14   | Nucleotides                        | 51727.1                                                                                                                                                     |
| CYTK4        | cytidylate kinase (dCMP),GTP                                    | [c] : dcmp + gtp <=> dcdp + gdp                             |            | Nucleotides                        | ( 26289.1 or 26289.2 )                                                                                                                                      |
| CYTK4n       | cytidylate kinase (dCMP,GTP),nuclear                            | [n] : dcmp + gtp <=> dcdp + gdp                             | 2.7.4.14   | Nucleotides                        | 51727.1                                                                                                                                                     |
| CYTK5        | cytidylate kinase (dCMP)                                        | [c] : ctp + dcmp <=> cdp + dcdp                             | 2.7.4.14   | Nucleotides                        | 51727.1                                                                                                                                                     |
| CYTK5n       | cytidylate kinase (CMP),nuclear                                 | [n] : cmp + gtp <=> cdp + gdp                               | 2.7.4.14   | Nucleotides                        | 51727.1                                                                                                                                                     |
| CYTK6        | cytidylate kinase (CMP,CTP)                                     | [c] : cmp + ctp <=> (2) cdp                                 | 2.7.4.14   | Nucleotides                        | 51727.1                                                                                                                                                     |
| CYTK6n       | cytidylate kinase (CMP,CTP),nuclear                             | [n] : cmp + ctp <=> (2) cdp                                 | 2.7.4.14   | Nucleotides                        | 51727.1                                                                                                                                                     |
| CYTK7        | cytidylate kinase (CMP,UTP)                                     | [c] : cmp + utp <=> cdp + udp                               | 2.7.4.14   | Nucleotides                        | 51727.1                                                                                                                                                     |
| CYTK7n       | cytidylate kinase (CMP,UTP),nuclear                             | [n] : cmp + utp <=> cdp + udp                               | 2.7.4.14   | Nucleotides                        | 51727.1                                                                                                                                                     |
| CYTK8        | cytidylate kinase (CMP,dATP)                                    | [c] : cmp + datp <=> cdp + dadp                             | 2.7.4.14   | Nucleotides                        | 51727.1                                                                                                                                                     |
| CYTK8n       | cytidylate kinase (CMP,dATP),nuclear                            | [n] : cmp + datp <=> cdp + dadp                             | 2.7.4.14   | Nucleotides                        | 51727.1                                                                                                                                                     |
| CYTK9        | cytidylate kinase (CMP,dCTP)                                    | [c] : cmp + dctp <=> cdp + dcdp                             | 2.7.4.14   | Nucleotides                        | 51727.1                                                                                                                                                     |
| CYTK9n       | cytidylate kinase (CMP,dCTP),nuclear                            | [n] : cmp + dctp <=> cdp + dcdp                             | 2.7.4.14   | Nucleotides                        | 51727.1                                                                                                                                                     |
| D-3AIBt      | D-3-amino-isobutyrate transport                                 | 3aib-D[e] --> 3aib-D[c]                                     |            | Transport, Extracellular           |                                                                                                                                                             |
| D3AIBTn      | D-3-Amino-isobutanoate:pyruvate aminotransferase, mitochondrial | [m] : 3aib-D + pyr <=> 2mpo + ala-L                         | 2.6.1.40   | Pyrimidine Catabolism              |                                                                                                                                                             |
| DADA         | Deoxyadenosine deaminase                                        | [c] : dad-2 + h + h2o --> din + nh4                         |            | Nucleotides                        | 100.1                                                                                                                                                       |
| DADAe        | Deoxyadenosine deaminase, extracellular                         | [e] : dad-2 + h + h2o --> din + nh4                         |            | Nucleotides                        | 100.1                                                                                                                                                       |
| DADNK        | deoxyadenosine kinase                                           | [c] : atp + dad-2 --> adp + damp + h                        | 2.7.1.76   | Nucleotides                        |                                                                                                                                                             |
| DADN4        | deoxyadenosine transport via diffusion                          | dad-2[e] <=> dad-2[c]                                       |            | Transport, Extracellular           |                                                                                                                                                             |
| DAG_HSter    | diacylglycerol ER export                                        | dag_hs[r] --> dag_hs[c]                                     |            | Transport, Endoplasmic Reticular   |                                                                                                                                                             |
| DAGK_hs      | Diacylglycerol phosphate kinase (homo sapiens)                  | [c] : atp + dag_hs <=> adp + h + pa_hs                      | 2.7.1.107  | Glycerophospholipid Metabolism     | ( 8526.1 or 8525.1 or 8525.2 or 8525.3 or 1609.1 or 9162.1 or 160851.1 or 160851.2 or 16081.1 or 8527.2 or 1607.1 or 1607.2 or 1607.1 or 1606.1 or 8527.1 ) |
| DAGKn_hs     | Diacylglycerol phosphate kinase (homo sapiens)                  | [n] : atp + dag_hs <=> adp + h + pa_hs                      | 2.7.1.107  | Glycerophospholipid Metabolism     | ( 8525.1 or 9162.1 )                                                                                                                                        |
| DALAOXx      | D-Alanine Oxidase (x)                                           | [x] : ala-D + h2o + o2 --> h2o2 + nh4 + pyr                 | 1.4.3.3    | D-alanine metabolism               | 1610.1                                                                                                                                                      |
| DALAt2r      | D-alanine transport via proton symport                          | ala-D[e] + h[e] <=> ala-D[c] + h[c]                         |            | Transport, Extracellular           | 206358.1                                                                                                                                                    |
| DALAt2l      | D-alanine transport via proton symport (lysosome)               | ala-D[l] + h[l] <=> ala-D[c] + h[c]                         |            | Transport, Lysosomal               | 206358.1                                                                                                                                                    |
| DALAct       | D-Alanine transport to peroxisome                               | ala-D[c] --> ala-D[x]                                       |            | D-alanine metabolism               |                                                                                                                                                             |
| DARGOp       | D-arginine oxidase, peroxisomal                                 | [x] : arg-D + h2o + o2 --> 5g2oxt + h2o2 + nh4              | 1.4.3.3    | D-arg and D-orn metabolism         | 1610.1                                                                                                                                                      |
| DASCBH       | L-Delhydroascorbate lactonohydrolase                            | [c] : dhdasch + h2o --> 23doguln + h                        | 3.1.1.17   | Ascorbate and Aldarate Metabolism  |                                                                                                                                                             |
| DASCBR       | dehydroascorbate reductase                                      | [c] : dhdasch + h + nadph --> ascb-L + nadp                 | 1.6.5.4    | Ascorbate and Aldarate Metabolism  | ( 2745.1 or 51022.1 or 51022.2 )                                                                                                                            |
| DASPO1p      | D-aspartate oxidase, peroxisomal                                | [x] : asp-D + h2o + o2 --> h2o2 + nh4 + oaa                 | 1.4.3.1    | Alanine and Aspartate Metabolism   | ( 8528.2 or 8528.1 )                                                                                                                                        |
| DATPn        | dATP diffusion in nucleus                                       | datp[c] <=> datp[n]                                         |            | Transport, Nuclear                 |                                                                                                                                                             |

| Abbreviation    | Reaction Name                                                             | Reaction                                                        | E.C. #    | Pathway                                  | Gene association                                             |
|-----------------|---------------------------------------------------------------------------|-----------------------------------------------------------------|-----------|------------------------------------------|--------------------------------------------------------------|
| DCIm            | dodecenyl-Coenzyme A delta isomerase                                      | [m] : dd2coa <=> dd3coa                                         | 5.3.3.8   | Fatty Acid Metabolism                    | 1632.1                                                       |
| DCK1m           | Deoxycytidine kinase, mitochondrial (ATP)                                 | [m] : atp + dcyt <=> adp + dcmp + h                             | 2.7.1.74  | Nucleotides                              |                                                              |
| DCK1n           | Deoxycytidine kinase, nuclear (ATP)                                       | [n] : atp + dcyt <=> adp + dcmp + h                             | 2.7.1.74  | Nucleotides                              | 1633.1                                                       |
| DCK2n           | Deoxycytidine kinase, nuclear (UTP)                                       | [n] : dcyt + utp <=> dcmp + h + udp                             | 2.7.1.74  | Nucleotides                              | 1633.1                                                       |
| DCMPDA          | dCMP deaminase                                                            | [e] : dcmp + h + h2o <=> dump + nh4                             | 3.5.4.12  | Pyrimidine Catabolism                    | 1635.1                                                       |
| DCSPIN1COAix    | fatty acid intracellular transport                                        | dcspn1coa[c] <=> dcspn1coa[x]                                   |           | Transport, Peroxisomal                   |                                                              |
| DCSPIN1CPT1     | carnitine O-palmitoyltransferase                                          | [e] : crn + dcspn1coa -> coa + dcspn1crn                        | 2.3.1.21  | Carnitine shuttle                        | (1375.4 or 1374.1 or 126129.1 or 1375.3 or 1375.2 or 1375.1) |
| DCSPIN1CPT2     | carnitine transferase                                                     | [m] : coa + dcspn1crn -> crn + dcspn1coa                        |           | Carnitine shuttle                        | 1376.1                                                       |
| DCSPIN1CRNt     | transport into the mitochondria (carnitine)                               | dcspn1crn[c] -> dcspn1crn[m]                                    |           | Carnitine shuttle                        | 788.1                                                        |
| DCSPIN1t        | fatty acid transport via diffusion                                        | dcspn1[e] <=> dcspn1[c]                                         |           | Transport, Extracellular                 |                                                              |
| DCT             | Dopachrome tautomerase                                                    | [e] : L-dpchrn <=> 56dhindlcrbxh                                | 5.3.3.12  | Tyrosine metabolism                      | 1638.1                                                       |
| DCTPn           | dCTP diffusion in nucleus                                                 | dcstp[c] <=> dcstp[n]                                           |           | Transport, Nuclear                       |                                                              |
| DCYTD           | deoxycytidine deaminase                                                   | [e] : dcyt + h + h2o -> duri + nh4                              | 3.5.4.14  | Pyrimidine Catabolism                    | (978.1 or 57379.1)                                           |
| DCYTDn          | deoxycytidine deaminase, nuclear                                          | [n] : dcyt + h + h2o -> duri + nh4                              | 3.5.4.14  | Nucleotides                              | 57379.1                                                      |
| DCYTt           | deoxycytidine transport via diffusion                                     | dcyt[c] <=> dcyt[e]                                             |           | Transport, Extracellular                 |                                                              |
| DDPGAm          | 2-dehydro-3-deoxy-phosphogluconate aldolase, mitochondrial                | [m] : 4h2oght <=> glx + pyr                                     | 4.1.2.14  | Arginine and Proline Metabolism          |                                                              |
| DEBRISOQUINEt   | debrisoquine uniport                                                      | debrisoquine[e] <=> debrisoquine[c]                             |           | Transport, Extracellular                 | (6582.1 or 6582.2)                                           |
| DECDPtm         | lipid, flip-flop intracellular transport                                  | decdp[c] <=> decdp[m]                                           |           | Transport, Mitochondrial                 |                                                              |
| DEDOLP_L        | dehydrodichol diphosphate phosphatase (liver)                             | [e] : (0.1) dedolp_L + h2o -> (0.1) dedolp_L + h + pi           |           | N-Glycan Biosynthesis                    |                                                              |
| DEDOLP_U        | dehydrodichol diphosphate phosphatase (uterus)                            | [e] : (0.1) dedolp_U + h2o -> (0.1) dedolp_U + h + pi           |           | N-Glycan Biosynthesis                    |                                                              |
| DEDOLP2_L       | dehydrodichol phosphate phosphatase (liver)                               | [e] : (0.1) dedolp_L + h2o -> (0.1) dedol_L + pi                |           | N-Glycan Biosynthesis                    |                                                              |
| DEDOLP2_U       | dehydrodichol phosphate phosphatase (uterus)                              | [e] : (0.1) dedolp_U + h2o -> (0.1) dedol_U + pi                |           | N-Glycan Biosynthesis                    |                                                              |
| DEDOL_L         | dehydrodichol reductase (liver)                                           | [e] : (0.1) dedol_L + h + nadph -> (0.1) dolchol_L + nadp       |           | N-Glycan Biosynthesis                    |                                                              |
| DEDOL_U         | dehydrodichol reductase (uterus)                                          | [e] : (0.1) dedol_U + h + nadph -> (0.1) dolchol_U + nadp       |           | N-Glycan Biosynthesis                    |                                                              |
| DESAT16_2       | palmitoyl-CoA desaturase (n-C16:0CoA -> n-C16:1CoA)                       | [e] : h + nadh + o2 + pmcoa -> (2) h2o + hdcoa + nad            | 1.14.19.1 | Fatty acid elongation                    | 6319.1                                                       |
| DESAT18_10      | fatty acyl-CoA desaturase (n-C18:2CoA -> n-C18:3CoA)                      | [e] : h + lnlncoa + nadh + o2 -> (2) h2o + nad + strdncoa       | 1.14.19.1 | Fatty acid elongation                    | 9415.1                                                       |
| DESAT18_3       | stearyl-CoA desaturase (n-C18:0CoA -> n-C18:1CoA)                         | [e] : h + nadh + o2 + steoa -> (2) h2o + nad + odecoa           | 1.14.19.1 | Fatty acid elongation                    | 6319.1                                                       |
| DESAT18_4       | stearyl-CoA desaturase (n-C18:0CoA -> n-C18:1CoA)                         | [e] : h + nadh + o2 + steoa -> (2) h2o + nad + vaccoa           | 1.14.19.1 | Fatty acid elongation                    | 6319.1                                                       |
| DESAT18_5       | stearyl-CoA desaturase (n-C18:0CoA -> n-C18:1CoA)                         | [e] : h + nadh + o2 + steoa -> (2) h2o + nad + od2coa           | 1.14.19.1 | Fatty acid elongation                    | 6319.1                                                       |
| DESAT18_6       | fatty acyl-CoA desaturase (n-C18:1CoA -> n-C18:2CoA)                      | [e] : h + nadh + o2 + odecoa -> (2) h2o + lneldcoa + nad        | 1.14.19.1 | Fatty acid elongation                    | 9415.1                                                       |
| DESAT18_7       | fatty acyl-CoA desaturase (n-C18:1CoA -> n-C18:2CoA)                      | [e] : h + nadh + o2 + vaccoa -> (2) h2o + lneldcoa + nad        | 1.14.19.1 | Fatty acid elongation                    | 9415.1                                                       |
| DESAT18_8       | fatty acyl-CoA desaturase (n-C18:1CoA -> n-C18:2CoA)                      | [e] : h + nadh + o2 + od2coa -> (2) h2o + lneldcoa + nad        | 1.14.19.1 | Fatty acid elongation                    | 9415.1                                                       |
| DESAT18_9       | fatty acyl-CoA desaturase (n-C18:2CoA -> n-C18:3CoA)                      | [e] : h + lnlecoa + nadh + o2 -> (2) h2o + lnlncecoa + nad      | 1.14.19.1 | Fatty acid elongation                    | 9415.1                                                       |
| DESAT20_1       | fatty acyl-CoA desaturase (n-C20:3CoA -> n-C20:4CoA)                      | [e] : dlmlcecoa + h + nadh + o2 -> arachdcoa + (2) h2o + nad    | 1.14.19.1 | Fatty acid elongation                    | 3992.1                                                       |
| DESAT20_2       | fatty acyl-CoA desaturase (n-C20:4CoA -> n-C20:5CoA)                      | [e] : eicosetecoa + h + nadh + o2 -> (2) h2o + nad + tmndcecoa  | 1.14.19.1 | Fatty acid elongation                    | 3992.1                                                       |
| DESAT22_1p      | fatty acyl-CoA desaturase (n-C22:4CoA -> n-C22:5CoA)                      | [x] : admcoa + h + nadh + o2 -> dcspn1coa + (2) h2o + nad       | 1.14.19.1 | Fatty acid elongation                    |                                                              |
| DESAT22_2p      | fatty acyl-CoA desaturase (n-C22:5CoA -> n-C22:6CoA)                      | [x] : clpndcoa + h + nadh + o2 -> c226coa + (2) h2o + nad       | 1.14.19.1 | Fatty acid elongation                    |                                                              |
| DESAT24_1       | fatty acyl-CoA desaturase (n-C24:5CoA -> n-C24:6CoA)                      | [e] : h + nadh + o2 + tetpent3coa -> (2) h2o + nad + tethex3coa | 1.14.19.1 | Fatty acid elongation                    | 9415.1                                                       |
| DGAT            | diacylglycerol acyltransferase                                            | [e] : Rtotal3coa + dag_hs -> coa + tag_hs                       |           | Triacylglycerol Synthesis                | (8694.1 or 84649.1)                                          |
| DGCHOLte        | bile acid intracellular transport                                         | dgchol[e] <=> dgchol[c]                                         |           | Transport, Extracellular                 |                                                              |
| DGCHOLtx        | bile acid intracellular transport                                         | dgchol[s] <=> dgchol[c]                                         |           | Transport, Peroxisomal                   |                                                              |
| DGK1            | deoxyguanylate kinase (dGMP:ATP)                                          | [e] : atp + dgmp <=> adp + dgdp                                 | 2.7.4.8   | Nucleotides                              | 2987.1                                                       |
| DGK2m           | deoxyguanylate kinase (dGMP:dATP) (mitochondrial)                         | [m] : dapt + dgmp <=> dadp + dgdp                               | 2.7.4.8   | Nucleotides                              |                                                              |
| DGNSKm          | deoxyguanosine kinase                                                     | [m] : atp + dgsn -> adp + dgmp + h                              | 2.7.1.113 | Nucleotides                              | (1716.1 or 1716.2 or 1716.4 or 1716.5 or 1716.3)             |
| DGSNt           | deoxyguanosine transport via diffusion                                    | dgsn[e] <=> dgsn[c]                                             |           | Transport, Extracellular                 |                                                              |
| DGSNm           | deoxyguanosine transport in mitochondria                                  | dgsn[c] <=> dgsn[m]                                             |           | Transport, Mitochondrial                 |                                                              |
| DGTPn           | dGTP diffusion in nucleus                                                 | dgtp[c] <=> dgtp[n]                                             |           | Transport, Nuclear                       |                                                              |
| DGULND          | dehydro-L-gulonate decarboxylase                                          | [e] : 3dhgulin + h <=> co2 + xyly-L                             | 4.1.1.34  | Penrose and Glucuronate Interconversions |                                                              |
| DHAA1r          | dehydroascorbate transport (uniport)                                      | dhdascb[e] <=> dhdascb[c]                                       |           | Transport, Extracellular                 | (6515.1 or 6517.1 or 6513.1)                                 |
| DHAPA           | dihydroxyacetone phosphate acyltransferase                                | [e] : Rtotalcoa + dhap -> adhap_hs + coa                        | 2.3.1.42  | Triacylglycerol Synthesis                | 8443.1                                                       |
| DHAPAx          | dihydroxyacetone phosphate acyltransferase                                | [x] : Rtotalcoa + dhap -> adhap_hs + coa                        | 2.3.1.42  | Triacylglycerol Synthesis                | 8443.1                                                       |
| DHCHOLESTANATEm | lipid, flip-flop intracellular transport                                  | dhcholestanate[m] <=> dhcholestanate[x]                         |           | Transport, Peroxisomal                   |                                                              |
| DHCR241r        | 24-dehydrocholesterol reductase [Precursor]                               | [r] : fadh2 + zymst -> fad + zymstnl                            |           | Cholesterol Metabolism                   | 1718.1                                                       |
| DHCR242r        | 24-dehydrocholesterol reductase [Precursor]                               | [r] : chlstol + fadh2 -> fad + hlst1                            |           | Cholesterol Metabolism                   | 1718.1                                                       |
| DHCR243r        | 24-dehydrocholesterol reductase [Precursor]                               | [r] : dsmssterol + fadh2 -> chsterol + fad                      |           | Cholesterol Metabolism                   | 1718.1                                                       |
| DHCR71r         | 7-dehydrocholesterol reductase                                            | [r] : ddsmssterol + h + nadph -> dsmssterol + nadp              | 1.3.1.21  | Cholesterol Metabolism                   | 1717.1                                                       |
| DHCR72r         | 7-dehydrocholesterol reductase                                            | [r] : 7dhchsterol + h + nadph -> chsterol + nadp                | 1.3.1.21  | Cholesterol Metabolism                   | 1717.1                                                       |
| DHCRD1          | dihydroceramide desaturase                                                | [e] : dhcrm_hs + nadp -> crm_hs + h + nadph                     |           | Sphingolipid Metabolism                  | (8560.1 or 8560.2)                                           |
| DHCRD2          | dihydroceramide desaturase                                                | [e] : dhcrm_hs + fad -> crm_hs + fadh2                          |           | Sphingolipid Metabolism                  | (8560.1 or 8560.2)                                           |
| DHDPBMTm        | dihydroxydecaprenylbenzoate methyltransferase                             | [m] : 3dpdnh + amet -> 3dpdnh_me + ahcys + h                    |           | Ubiquinone Biosynthesis                  | 51805.1                                                      |
| DHEASt          | dehydroepiandrosterone sulfate transport via bicarbonate countertransport | dheas[e] + hco3[e] <=> dheas[c] + hco3[e]                       |           | Transport, Extracellular                 | (6579.1 or 10599.1 or 28234.1 or 11309.1)                    |
| DHEASr          | dheas intracellular transport                                             | dheas[r] <=> dheas[c]                                           |           | Transport, Extracellular                 |                                                              |
| DHEASULT        | Dehydroepiandrosterone sulfotransferase                                   | [e] : dheas + paps -> dheas + h + pap                           | 2.8.2.2   | Steroid Metabolism                       | (6783.1 or 6822.1)                                           |
| DHFR            | dihydrofolate reductase                                                   | [e] : dhf + h + nadph <=> nadp + thf                            | 1.5.1.3   | Folate Metabolism                        | 1719.1                                                       |
| DHFu            | dihydrofolate reversible lysosomal transport                              | dhf[c] <=> dhf[l]                                               |           | Transport, Lysosomal                     |                                                              |

| Abbreviation    | Reaction Name                                                     | Reaction                                        | E.C. #   | Pathway                                   | Gene association                                                                                                                                       |
|-----------------|-------------------------------------------------------------------|-------------------------------------------------|----------|-------------------------------------------|--------------------------------------------------------------------------------------------------------------------------------------------------------|
| DHFm            | dihydrofolate reversible mitochondrial transport                  | dhf[c] <=> dhf[m]                               |          | Transport, Mitochondrial                  |                                                                                                                                                        |
| DHORD9          | dihydroorotic acid dehydrogenase (quinone10)                      | dhor-S[c] + q10[m] -> oro[c] + q10h2[m]         |          | Pyrimidine Biosynthesis                   | 1723.1                                                                                                                                                 |
| DHORTS          | dihydroorotase                                                    | [c] : dhor-S + h2o <=> chasp + h                | 3.5.2.3  | Pyrimidine Biosynthesis                   | 790.1                                                                                                                                                  |
| DHPM1           | dihydropyrimidinase (5,6-dihydrouracil)                           | [c] : 56dura + h2o -> cala + h                  | 3.5.2.2  | Pyrimidine Catabolism                     | ( 1807.1 or 1808.1 or 1809.1 )                                                                                                                         |
| DHPM2           | dihydropyrimidinase (dihydrothymine)                              | [c] : 56dthm + h2o -> 3uib + h                  | 3.5.2.2  | Pyrimidine Catabolism                     |                                                                                                                                                        |
| DHPR            | 6,7-dihydropteridine reductase                                    | [c] : dhbpt + h + nadh -> nad + thbpt           |          | Tetrahydrobiopterin                       | 5860.1                                                                                                                                                 |
| DHPR2           | 6,7-dihydropteridine reduction                                    | [c] : 5mthf + dhbpt -> h + mithf + thbpt        |          | Tetrahydrobiopterin                       |                                                                                                                                                        |
| DIDPtn          | dIDP nuclear transport                                            | didp[c] <=> didp[n]                             |          | Transport, Nuclear                        |                                                                                                                                                        |
| DIGALSGALSIDEt  | digalsalside_hs transport                                         | digalsalside_hs[c] <=> digalsalside_hs[e]       |          | Transport, Extracellular                  |                                                                                                                                                        |
| DIGALSGALSIDEig | digalsalside_hs intracellular transport                           | digalsalside_hs[c] <=> digalsalside_hs[g]       |          | Transport, Golgi Apparatus                |                                                                                                                                                        |
| DIGALSIDEig     | digalside_hs intracellular transport                              | digalside_hs[c] <=> digalside_hs[g]             |          | Transport, Golgi Apparatus                |                                                                                                                                                        |
| DIGALSIDEi      | digalside_hs intracellular transport                              | digalside_hs[c] <=> digalside_hs[l]             |          | Transport, Lysosomal                      |                                                                                                                                                        |
| DINt            | deoxyinosine transport via diffusion                              | din[c] <=> din[e]                               |          | Transport, Extracellular                  |                                                                                                                                                        |
| DITPtn          | dITP nuclear transport                                            | dip[c] <=> dip[n]                               |          | Transport, Nuclear                        |                                                                                                                                                        |
| DKMPPD          | 2,3-diketo-5-methylthio-1-phosphopentane degradation reaction     | [c] : dkmp + h2o -> 2kmb + for + (2) h + pi     |          | Arginine and Proline Metabolism           |                                                                                                                                                        |
| D-LACt2         | D-lactate transport via proton symport                            | h[e] + lac-D[e] <=> h[c] + lac-D[c]             |          | Transport, Extracellular                  | ( 6566.1 or 9194.1 or 23539.1 or 9123.1 )                                                                                                              |
| D-LACtm         | D-lactate transport, mitochondrial                                | h[c] + lac-D[c] <=> h[m] + lac-D[m]             |          | Transport, Mitochondrial                  | 6566.1                                                                                                                                                 |
| DLNLGCGPT1      | carnitine O-palmitoyltransferase                                  | [c] : crn + dlncgcoa -> coa + dlncgcrn          | 2.3.1.21 | Carnitine shuttle                         | ( 1375.4 or 1374.1 or 126129.1 or 1375.3 or 1375.2 or 1375.1 )                                                                                         |
| DLNLGCGPT2      | carnitine transferase                                             | [m] : coa + dlncgcrn -> crn + dlncgcoa          |          | Carnitine shuttle                         | 1376.1                                                                                                                                                 |
| DLNLGCGRNt      | transport into the mitochondria (carnitine)                       | dlncgcrn[c] -> dlncgcrn[m]                      |          | Carnitine shuttle                         | 788.1                                                                                                                                                  |
| DLNLGt          | fatty acid transport via diffusion                                | dlncg[c] <=> dlncg[e]                           |          | Transport, Extracellular                  |                                                                                                                                                        |
| DMAINTPYRINt    | kenobiotic transport                                              | dmantipyrine[e] <=> dmantipyrine[c]             |          | Transport, Extracellular                  |                                                                                                                                                        |
| DMAIT           | dimethylallyltransferase                                          | [c] : dmpp + ipdp -> grp + ppi                  | 2.5.1.1  | Cholesterol Metabolism                    | 9453.1                                                                                                                                                 |
| DMAITx          | dimethylallyltransferase                                          | [x] : dmpp + ipdp -> grp + ppi                  | 2.5.1.1  | Cholesterol Metabolism                    | 2224.1                                                                                                                                                 |
| DMGDHm          | dimethylglycine dehydrogenase, mitochondrial                      | [m] : dmgly + fad + h2o -> fadh2 + fald + sarcs | 1.5.99.2 | Glycine, Serine, and Threonine Metabolism | 29958.1                                                                                                                                                |
| DMGtm           | dimethylglycine transport via diffusion (cytosol to mitochondria) | dmgly[c] <=> dmgly[m]                           |          | Transport, Mitochondrial                  |                                                                                                                                                        |
| DMHPTCRNCPT1    | carnitine fatty-acyl transferase                                  | [c] : crn + dmhptcoa <=> coa + dmhptcrn         | 2.3.1.21 | Carnitine shuttle                         |                                                                                                                                                        |
| DMHPTCRNCPT2    | 2,6 dimethylheptanoyl CoA carnitine transferase                   | [m] : coa + dmhptcrn <=> crn + dmhptcoa         |          | Carnitine shuttle                         |                                                                                                                                                        |
| DMHPTCRNt       | 2,6 dimethylheptanoyl crn transport                               | dmhptcrn[c] <=> dmhptcrn[m]                     |          | Carnitine shuttle                         |                                                                                                                                                        |
| DMHPTCRNt       | 2,6 dimethylheptanoyl carnitine transport                         | dmhptcrn[c] <=> dmhptcrn[e]                     |          | Transport, Extracellular                  |                                                                                                                                                        |
| DNADDP          | Deaminido NAD diphosphatase                                       | [c] : dnad + h2o -> amp + (2) h + nicrt         | 3.6.1.9  | NAD Metabolism                            | ( 5167.1 or 5168.1 or 5169.1 )                                                                                                                         |
| DNADn           | dNAD transport, nuclear through pore                              | dnad[c] <=> dnad[n]                             |          | Transport, Nuclear                        |                                                                                                                                                        |
| DNAMTn          | DNA (cytosine-5-)-methyltransferase, nucleus                      | [n] : amet + dna -> ahcys + dna5mtc + h         | 2.1.1.37 | Methionine Metabolism                     | ( 1786.1 or 1787.1 or 1787.2 or 1787.3 or 1787.4 or 1787.5 or 1787.6 or 1788.1 or 1788.2 or 1788.3 or 1788.4 or 1789.1 or 1789.2 or 1789.3 or 1789.4 ) |
| DNAMTSe         | DNA (cytosine-5-)-methyltransferase, nucleus                      | [n] : dna + seasmt -> dna5mtc + h + seahcys     | 2.1.1.37 | Selenoamino acid metabolism               | ( 1786.1 or 1787.1 or 1787.2 or 1787.3 or 1787.4 or 1787.5 or 1787.6 or 1788.1 or 1788.2 or 1788.3 or 1788.4 or 1789.1 or 1789.2 or 1789.3 or 1789.4 ) |
| DNDP10m         | dADP transport via dCDP antiport                                  | dadp[c] + dcdp[m] -> dadp[m] + dcdp[c]          |          | Transport, Mitochondrial                  | 60386.1                                                                                                                                                |
| DNDP11m         | dADP transport via dGDP antiport                                  | dadp[c] + dgdpm[m] -> dadp[m] + dgdpc[c]        |          | Transport, Mitochondrial                  | 60386.1                                                                                                                                                |
| DNDP12m         | dADP transport via ADP antiport                                   | adp[m] + dadp[c] -> adp[c] + dadp[m]            |          | Transport, Mitochondrial                  | 60386.1                                                                                                                                                |
| DNDP13m         | dADP transport via ATP antiport                                   | atp[m] + dadp[c] -> atp[c] + dadp[m]            |          | Transport, Mitochondrial                  | 60386.1                                                                                                                                                |
| DNDP14m         | dUDP transport via dTDP antiport                                  | dudp[m] + dudp[c] -> dudp[m] + dudp[c]          |          | Transport, Mitochondrial                  | 60386.1                                                                                                                                                |
| DNDP15m         | dUDP transport via dGDP antiport                                  | dgdpm[m] + dudp[c] -> dgdpc[c] + dudp[m]        |          | Transport, Mitochondrial                  | 60386.1                                                                                                                                                |
| DNDP16m         | dUDP transport via dADP antiport                                  | dadp[m] + dudp[c] -> dadp[c] + dudp[m]          |          | Transport, Mitochondrial                  | 60386.1                                                                                                                                                |
| DNDP17m         | dUDP transport via dCDP antiport                                  | dcdp[m] + dudp[c] -> dcdpc[c] + dudp[m]         |          | Transport, Mitochondrial                  | 60386.1                                                                                                                                                |
| DNDP18m         | dUDP transport via ADP antiport                                   | adp[m] + dudp[c] -> adp[c] + dudp[m]            |          | Transport, Mitochondrial                  | 60386.1                                                                                                                                                |
| DNDP19m         | dUDP transport via ATP antiport                                   | atp[m] + dudp[c] -> atp[c] + dudp[m]            |          | Transport, Mitochondrial                  | 60386.1                                                                                                                                                |
| DNDP1m          | dATP transport via ADP antiport                                   | adp[m] + datp[c] -> adp[c] + datp[m]            |          | Transport, Mitochondrial                  | 60386.1                                                                                                                                                |
| DNDP20m         | dTDP transport via ATP antiport                                   | atp[m] + dtdp[c] -> atp[c] + dtdp[m]            |          | Transport, Mitochondrial                  | 60386.1                                                                                                                                                |
| DNDP21m         | dTDP transport via ADP antiport                                   | adp[m] + dtdp[c] -> adp[c] + dtdp[m]            |          | Transport, Mitochondrial                  | 60386.1                                                                                                                                                |
| DNDP22m         | dTDP transport via dUDP antiport                                  | dudp[c] + dtdp[m] -> dtdp[m] + dudp[c]          |          | Transport, Mitochondrial                  | 60386.1                                                                                                                                                |
| DNDP23m         | dTDP transport via dGTP antiport                                  | dgdpm[m] + dtdp[c] -> dgdpc[c] + dtdp[m]        |          | Transport, Mitochondrial                  | 60386.1                                                                                                                                                |
| DNDP24m         | dTDP transport via dADP antiport                                  | dadp[m] + dtdp[c] -> dadp[c] + dtdp[m]          |          | Transport, Mitochondrial                  | 60386.1                                                                                                                                                |
| DNDP25m         | dTDP transport via dCDP antiport                                  | dcdp[m] + dtdp[c] -> dcdpc[c] + dtdp[m]         |          | Transport, Mitochondrial                  | 60386.1                                                                                                                                                |
| DNDP26m         | dCDP transport via dUDP antiport                                  | dcdp[c] + dudp[m] -> dcdp[m] + dudp[c]          |          | Transport, Mitochondrial                  | 60386.1                                                                                                                                                |
| DNDP27m         | dCDP transport via dTDP antiport                                  | dcdp[c] + dtdp[m] -> dcdp[m] + dtdp[c]          |          | Transport, Mitochondrial                  | 60386.1                                                                                                                                                |
| DNDP28m         | dCDP transport via dGDP antiport                                  | dcdp[c] + dgdpm[m] -> dcdp[m] + dgdpc[c]        |          | Transport, Mitochondrial                  | 60386.1                                                                                                                                                |
| DNDP29m         | dCDP transport via dADP antiport                                  | dadp[m] + dcdp[c] -> dadp[c] + dcdp[m]          |          | Transport, Mitochondrial                  | 60386.1                                                                                                                                                |
| DNDP2m          | dATP transport via ATP antiport                                   | atp[m] + datp[c] -> atp[c] + datp[m]            |          | Transport, Mitochondrial                  | 60386.1                                                                                                                                                |
| DNDP30m         | dCDP transport via ADP antiport                                   | adp[m] + dcdp[c] -> adp[c] + dcdp[m]            |          | Transport, Mitochondrial                  | 60386.1                                                                                                                                                |
| DNDP31m         | dCDP transport via ATP antiport                                   | atp[m] + dcdp[c] -> atp[c] + dcdp[m]            |          | Transport, Mitochondrial                  | 60386.1                                                                                                                                                |
| DNDP32m         | dGDP transport via ATP antiport                                   | atp[m] + dgdpc[c] -> atp[c] + dgdpm[m]          |          | Transport, Mitochondrial                  | 60386.1                                                                                                                                                |
| DNDP33m         | dGDP transport via dUDP antiport                                  | dgdpm[m] + dudp[c] -> dgdpc[c] + dudp[m]        |          | Transport, Mitochondrial                  | 60386.1                                                                                                                                                |
| DNDP34m         | dGDP transport via dTDP antiport                                  | dgdpm[c] + dtdp[m] -> dgdpc[c] + dtdp[c]        |          | Transport, Mitochondrial                  | 60386.1                                                                                                                                                |
| DNDP35m         | dGDP transport via dADP antiport                                  | dadp[m] + dgdpc[c] -> dadp[c] + dgdpm[m]        |          | Transport, Mitochondrial                  | 60386.1                                                                                                                                                |
| DNDP36m         | dGDP transport via dCDP antiport                                  | dcdp[m] + dgdpc[c] -> dcdp[c] + dgdpm[m]        |          | Transport, Mitochondrial                  | 60386.1                                                                                                                                                |
| DNDP37m         | dUTP transport via dTDP antiport                                  | dtdp[m] + dutp[c] -> dtdp[c] + dutp[m]          |          | Transport, Mitochondrial                  | 60386.1                                                                                                                                                |
| DNDP38m         | dUTP transport via dUDP antiport                                  | dudp[m] + dutp[c] -> dudp[c] + dutp[m]          |          | Transport, Mitochondrial                  | 60386.1                                                                                                                                                |
| DNDP39m         | dUTP transport via dGDP antiport                                  | dgdpm[m] + dutp[c] -> dgdpc[c] + dutp[m]        |          | Transport, Mitochondrial                  | 60386.1                                                                                                                                                |
| DNDP3m          | dATP transport via dCDP antiport                                  | atp[m] + dcdp[c] -> atp[c] + dcdp[m]            |          | Transport, Mitochondrial                  | 60386.1                                                                                                                                                |
| DNDP40m         | dUTP transport via dADP antiport                                  | dadp[m] + dutp[c] -> dadp[c] + dutp[m]          |          | Transport, Mitochondrial                  | 60386.1                                                                                                                                                |
| DNDP41m         | dUTP transport via dCDP antiport                                  | dcdp[m] + dutp[c] -> dcdp[c] + dutp[m]          |          | Transport, Mitochondrial                  | 60386.1                                                                                                                                                |
| DNDP42m         | dUTP transport via ADP antiport                                   | adp[m] + dutp[c] -> adp[c] + dutp[m]            |          | Transport, Mitochondrial                  | 60386.1                                                                                                                                                |

| Abbreviation  | Reaction Name                                                                                   | Reaction                                                                          | E.C. #    | Pathway                           | Gene association                                                                                                                                     |
|---------------|-------------------------------------------------------------------------------------------------|-----------------------------------------------------------------------------------|-----------|-----------------------------------|------------------------------------------------------------------------------------------------------------------------------------------------------|
| DNDP43m       | dUTP transport via ATP antiport                                                                 | atp[m] + dudp[c] --> atp[c] + dudp[m]                                             |           | Transport, Mitochondrial          | 60386.1                                                                                                                                              |
| DNDP44m       | dTTP transport via ATP antiport                                                                 | atp[m] + dttp[c] --> atp[c] + dttp[m]                                             |           | Transport, Mitochondrial          | 60386.1                                                                                                                                              |
| DNDP45m       | dTTP transport via ADP antiport                                                                 | adp[m] + dttp[c] --> adp[c] + dttp[m]                                             |           | Transport, Mitochondrial          | 60386.1                                                                                                                                              |
| DNDP46m       | dTTP transport via dUDP antiport                                                                | dtp[c] + dudp[m] --> dtp[m] + dudp[c]                                             |           | Transport, Mitochondrial          | 60386.1                                                                                                                                              |
| DNDP47m       | dTTP transport via dTDP antiport                                                                | dttp[m] + dudp[c] --> dttp[c] + dudp[m]                                           |           | Transport, Mitochondrial          | 60386.1                                                                                                                                              |
| DNDP48m       | dTTP transport via dGDP antiport                                                                | dgdtp[m] + dudp[c] --> dgdtp[c] + dudp[m]                                         |           | Transport, Mitochondrial          | 60386.1                                                                                                                                              |
| DNDP49m       | dTTP transport via dADP antiport                                                                | dadp[m] + dudp[c] --> dadp[c] + dudp[m]                                           |           | Transport, Mitochondrial          | 60386.1                                                                                                                                              |
| DNDP4m        | dATP transport via dUDP antiport                                                                | dudp[c] + dudp[m] --> dudp[m] + dudp[c]                                           |           | Transport, Mitochondrial          | 60386.1                                                                                                                                              |
| DNDP50m       | dTTP transport via dCDP antiport                                                                | dcdtp[m] + dudp[c] --> dcdtp[c] + dudp[m]                                         |           | Transport, Mitochondrial          | 60386.1                                                                                                                                              |
| DNDP51m       | dCTP transport via dCDP antiport                                                                | dcdp[m] + dctp[c] --> dcdp[c] + dctp[m]                                           |           | Transport, Mitochondrial          | 60386.1                                                                                                                                              |
| DNDP52m       | dCTP transport via dUDP antiport                                                                | dctp[c] + dudp[m] --> dctp[m] + dudp[c]                                           |           | Transport, Mitochondrial          | 60386.1                                                                                                                                              |
| DNDP53m       | dCTP transport via dGDP antiport                                                                | dctp[c] + dgdtp[m] --> dctp[m] + dgdtp[c]                                         |           | Transport, Mitochondrial          | 60386.1                                                                                                                                              |
| DNDP54m       | dCTP transport via dADP antiport                                                                | dadp[m] + dctp[c] --> dadp[c] + dctp[m]                                           |           | Transport, Mitochondrial          | 60386.1                                                                                                                                              |
| DNDP55m       | dCTP transport via ADP antiport                                                                 | adp[m] + dctp[c] --> adp[c] + dctp[m]                                             |           | Transport, Mitochondrial          | 60386.1                                                                                                                                              |
| DNDP56m       | dCTP transport via ATP antiport                                                                 | atp[m] + dctp[c] --> atp[c] + dctp[m]                                             |           | Transport, Mitochondrial          | 60386.1                                                                                                                                              |
| DNDP57m       | dGTP transport via ATP antiport                                                                 | atp[m] + dgtp[c] --> atp[c] + dgtp[m]                                             |           | Transport, Mitochondrial          | 60386.1                                                                                                                                              |
| DNDP58m       | dGTP transport via ADP antiport                                                                 | adp[m] + dgtp[c] --> adp[c] + dgtp[m]                                             |           | Transport, Mitochondrial          | 60386.1                                                                                                                                              |
| DNDP59m       | dGTP transport via dADP antiport                                                                | dadp[m] + dgtp[c] --> dadp[c] + dgtp[m]                                           |           | Transport, Mitochondrial          | 60386.1                                                                                                                                              |
| DNDP5m        | dATP transport via dTDP antiport                                                                | dudp[c] + dudp[m] --> dudp[m] + dudp[c]                                           |           | Transport, Mitochondrial          | 60386.1                                                                                                                                              |
| DNDP60m       | dGTP transport via dUDP antiport                                                                | dgtt[c] + dudp[m] --> dgtt[m] + dudp[c]                                           |           | Transport, Mitochondrial          | 60386.1                                                                                                                                              |
| DNDP61m       | dGTP transport via dTDP antiport                                                                | dgtt[c] + dudp[m] --> dgtt[m] + dudp[c]                                           |           | Transport, Mitochondrial          | 60386.1                                                                                                                                              |
| DNDP62m       | dGTP transport via dGDP antiport                                                                | dgdtp[m] + dgtt[c] --> dgdtp[c] + dgtt[m]                                         |           | Transport, Mitochondrial          | 60386.1                                                                                                                                              |
| DNDP63m       | dGTP transport via dCDP antiport                                                                | dcdtp[m] + dgtt[c] --> dcdtp[c] + dgtt[m]                                         |           | Transport, Mitochondrial          | 60386.1                                                                                                                                              |
| DNDP6m        | dATP transport via dGDP antiport                                                                | dudp[c] + dgdtp[m] --> dudp[m] + dgdtp[c]                                         |           | Transport, Mitochondrial          | 60386.1                                                                                                                                              |
| DNDP7m        | dATP transport via dADP antiport                                                                | dadp[m] + dudp[c] --> dadp[c] + dudp[m]                                           |           | Transport, Mitochondrial          | 60386.1                                                                                                                                              |
| DNDP8m        | dADP transport via dUDP antiport                                                                | dudp[c] + dudp[m] --> dudp[m] + dudp[c]                                           |           | Transport, Mitochondrial          | 60386.1                                                                                                                                              |
| DNDP9m        | dADP transport via dTDP antiport                                                                | dudp[c] + dudp[m] --> dudp[m] + dudp[c]                                           |           | Transport, Mitochondrial          | 60386.1                                                                                                                                              |
| DOGULND1      | 2,3-dioxo-L-gulonate decarboxylase (L-lyxonate-forming)                                         | [c]: 23doguln + h2o --> co2 + lyxnt                                               |           | Ascorbate and Aldarate Metabolism |                                                                                                                                                      |
| DOGULND2      | 2,3-dioxo-L-gulonate decarboxylase (L-xyloxy-forming)                                           | [c]: 23doguln + h2o --> co2 + xynt                                                |           | Ascorbate and Aldarate Metabolism |                                                                                                                                                      |
| DOGULNO1      | 2,3-dioxo-L-gulonate:hydrogen peroxide oxidoreductase                                           | [c]: 23doguln + h2o2 --> (2) h + oxa + thrnt                                      |           | Ascorbate and Aldarate Metabolism |                                                                                                                                                      |
| DOGULNO2      | 2,3-dioxo-L-gulonate:hydrogen peroxide oxidoreductase                                           | [c]: 23doguln + h2o --> eryth + h + oxa                                           |           | Ascorbate and Aldarate Metabolism |                                                                                                                                                      |
| DOLASNT_Ler   | Dolichyl-diphosphooligosaccharide:protein-L-asparagine oligopolysaccharidyltransferase (liver)  | [r]: Asn-X-Ser(Thr) + (0.1) g3m8mpdol_L --> (0.1) dolp_L + g3m8man + h            | 2.4.1.119 | N-Glycan Biosynthesis             | ( 6185.1 and 1650.1 and 1603.1 and 6184.1 )                                                                                                          |
| DOLASNT_Uter  | Dolichyl-diphosphooligosaccharide:protein-L-asparagine oligopolysaccharidyltransferase (uterus) | [r]: Asn-X-Ser(Thr) + (0.1) g3m8mpdol_U --> (0.1) dolp_U + g3m8man + h            | 2.4.1.119 | N-Glycan Biosynthesis             | ( 6185.1 and 1650.1 and 1603.1 and 6184.1 )                                                                                                          |
| DOLDPP_Ler    | Dolichyl-diphosphate phosphohydrolase, human (liver)                                            | [r]: (0.1) dolp_L + h2o --> (0.1) dolp_L + h + pi                                 | 3.6.1.43  | N-Glycan Biosynthesis             | 57171.1                                                                                                                                              |
| DOLDPP_Uter   | Dolichyl-diphosphate phosphohydrolase, human (uterus)                                           | [r]: (0.1) dolp_U + h2o --> (0.1) dolp_U + h + pi                                 | 3.6.1.43  | N-Glycan Biosynthesis             | 57171.1                                                                                                                                              |
| DOLGLCP_Lter  | Dolichyl beta-D-glucosyl phosphate flippase (liver)                                             | (0.1) dolglep_L[c] --> (0.1) dolglep_L[r]                                         |           | N-Glycan Biosynthesis             |                                                                                                                                                      |
| DOLGLCP_Uter  | Dolichyl beta-D-glucosyl phosphate flippase (uterus)                                            | (0.1) dolglep_U[c] --> (0.1) dolglep_U[r]                                         |           | N-Glycan Biosynthesis             |                                                                                                                                                      |
| DOLGPP_Ler    | Dolichyl-beta-D-glucosyl-phosphate dolichylphosphohydrolase (liver)                             | [r]: (0.1) dolglep_L + h2o --> (0.1) dolp_L + glc-D + h                           | 3.1.4.48  | N-Glycan Biosynthesis             |                                                                                                                                                      |
| DOLGPP_Uter   | Dolichyl-beta-D-glucosyl-phosphate dolichylphosphohydrolase (uterus)                            | [r]: (0.1) dolglep_U + h2o --> (0.1) dolp_U + glc-D + h                           | 3.1.4.48  | N-Glycan Biosynthesis             |                                                                                                                                                      |
| DOLICHOL_Lter | dolichol diffusion, human (liver)                                                               | (0.1) dolichol_L[r] <=> (0.1) dolichol_L[c]                                       |           | N-Glycan Biosynthesis             |                                                                                                                                                      |
| DOLICHOL_Uter | dolichol diffusion, human (uterus)                                                              | (0.1) dolichol_U[r] <=> (0.1) dolichol_U[c]                                       |           | N-Glycan Biosynthesis             |                                                                                                                                                      |
| DOLK_L        | Dolichol kinase, human (liver)                                                                  | [c]: ctp + (0.1) dolichol_L --> cdp + (0.1) dolp_L + h                            | 2.7.1.108 | N-Glycan Biosynthesis             |                                                                                                                                                      |
| DOLK_U        | Dolichol kinase, human (uterus)                                                                 | [c]: ctp + (0.1) dolichol_U --> cdp + (0.1) dolp_U + h                            | 2.7.1.108 | N-Glycan Biosynthesis             |                                                                                                                                                      |
| DOLMANP_Lter  | dolichol-phosphate mannose flippase (liver)                                                     | (0.1) dolmanp_L[c] --> (0.1) dolmanp_L[r]                                         |           | N-Glycan Biosynthesis             |                                                                                                                                                      |
| DOLMANP_Uter  | dolichol-phosphate mannose flippase (uterus)                                                    | (0.1) dolmanp_U[c] --> (0.1) dolmanp_U[r]                                         |           | N-Glycan Biosynthesis             |                                                                                                                                                      |
| DOLP_Lter     | dolichol phosphate flippase (liver)                                                             | (0.1) dolp_L[r] --> (0.1) dolp_L[c]                                               |           | N-Glycan Biosynthesis             |                                                                                                                                                      |
| DOLP_Uter     | dolichol phosphate flippase (uterus)                                                            | (0.1) dolp_U[r] --> (0.1) dolp_U[c]                                               |           | N-Glycan Biosynthesis             |                                                                                                                                                      |
| DOLPGT1_Ler   | dolichyl-phosphate-glucose-glycolipid alpha-glucosyltransferase (liver)                         | [r]: (0.1) dolglep_L + (0.1) m8mpdol_L --> (0.1) dolp_L + (0.1) g1m8mpdol_L + h   |           | N-Glycan Biosynthesis             | 29929.1                                                                                                                                              |
| DOLPGT1_Uter  | dolichyl-phosphate-glucose-glycolipid alpha-glucosyltransferase (uterus)                        | [r]: (0.1) dolglep_U + (0.1) m8mpdol_U --> (0.1) dolp_U + (0.1) g1m8mpdol_U + h   |           | N-Glycan Biosynthesis             | 29929.1                                                                                                                                              |
| DOLPGT2_Ler   | dolichyl-phosphate-glucose-glycolipid alpha-glucosyltransferase (liver)                         | [r]: (0.1) dolglep_L + (0.1) g1m8mpdol_L --> (0.1) dolp_L + (0.1) g2m8mpdol_L + h |           | N-Glycan Biosynthesis             | ( 79053.1 or 79053.2 or 79053.3 )                                                                                                                    |
| DOLPGT2_Uter  | dolichyl-phosphate-glucose-glycolipid alpha-glucosyltransferase (uterus)                        | [r]: (0.1) dolglep_U + (0.1) g1m8mpdol_U --> (0.1) dolp_U + (0.1) g2m8mpdol_U + h |           | N-Glycan Biosynthesis             | ( 79053.1 or 79053.2 or 79053.3 )                                                                                                                    |
| DOLPGT3_Ler   | dolichyl-phosphate-glucose-glycolipid alpha-glucosyltransferase (liver)                         | [r]: (0.1) dolglep_L + (0.1) g2m8mpdol_L --> (0.1) dolp_L + (0.1) g3m8mpdol_L + h |           | N-Glycan Biosynthesis             | 84920.1                                                                                                                                              |
| DOLPGT3_Uter  | dolichyl-phosphate-glucose-glycolipid alpha-glucosyltransferase (uterus)                        | [r]: (0.1) dolglep_U + (0.1) g2m8mpdol_U --> (0.1) dolp_U + (0.1) g3m8mpdol_U + h |           | N-Glycan Biosynthesis             | 84920.1                                                                                                                                              |
| DOLPH_Ler     | Dolichol-phosphate phosphohydrolase, human (liver)                                              | [r]: (0.1) dolp_L + h2o --> (0.1) dolichol_L + pi                                 | 3.1.3.51  | N-Glycan Biosynthesis             |                                                                                                                                                      |
| DOLPH_Uter    | Dolichol-phosphate phosphohydrolase, human (uterus)                                             | [r]: (0.1) dolp_U + h2o --> (0.1) dolichol_U + pi                                 | 3.1.3.51  | N-Glycan Biosynthesis             |                                                                                                                                                      |
| DOLPMT_L      | Dolichyl-phosphate D-mannosyltransferase (liver)                                                | [c]: (0.1) dolp_L + gdpmann --> (0.1) dolmanp_L + gdp                             | 2.4.1.83  | N-Glycan Biosynthesis             | ( ( 8813.1 and 8818.2 and 54344.1 ) or ( 54344.2 and 8818.2 and 8813.1 ) or ( 8813.1 and 54344.2 and 8818.1 ) or ( 54344.1 and 8813.1 and 8818.1 ) ) |
| DOLPMT_U      | Dolichyl-phosphate D-mannosyltransferase (uterus)                                               | [c]: (0.1) dolp_U + gdpmann --> (0.1) dolmanp_U + gdp                             | 2.4.1.83  | N-Glycan Biosynthesis             | ( ( 8813.1 and 8818.2 and 54344.1 ) or ( 54344.2 and 8818.2 and 8813.1 ) or ( 8813.1 and 54344.2 and 8818.1 ) or ( 54344.1 and 8813.1 and 8818.1 ) ) |
| DOLPMT1_Ler   | dolichyl-phosphate-mannose-glycolipid alpha-mannosyltransferase (liver)                         | [r]: (0.1) dolmanp_L + (0.1) m4mpdol_L --> (0.1) dolp_L + h + (0.1) m5mpdol_L     | 2.4.1.130 | N-Glycan Biosynthesis             | ( 10195.1 or 10195.2 or 10195.3 or 10195.4 )                                                                                                         |

| Abbreviation | Reaction Name                                                                 | Reaction                                                                                  | E.C. #    | Pathway                                    | Gene association                                                                                   |
|--------------|-------------------------------------------------------------------------------|-------------------------------------------------------------------------------------------|-----------|--------------------------------------------|----------------------------------------------------------------------------------------------------|
| DOLPMT1_Uer  | dolichyl-phosphate-mannose-glycolipid alpha-mannosyltransferase (uterus)      | [r] : (0.1) dolmanp_U + (0.1) m4mpdol_U --> (0.1) dolp_U + h + (0.1) m5mpdol_U            | 2.4.1.130 | N-Glycan Biosynthesis                      | (10195.1 or 10195.2 or 10195.3 or 10195.4)                                                         |
| DOLPMT2_Ler  | dolichyl-phosphate-mannose-glycolipid alpha-mannosyltransferase (liver)       | [r] : (0.1) dolmanp_L + (0.1) m5mpdol_L --> (0.1) dolp_L + h + (0.1) m6mpdol_L            | 2.4.1.130 | N-Glycan Biosynthesis                      |                                                                                                    |
| DOLPMT2_Uer  | dolichyl-phosphate-mannose-glycolipid alpha-mannosyltransferase (uterus)      | [r] : (0.1) dolmanp_U + (0.1) m5mpdol_U --> (0.1) dolp_U + h + (0.1) m6mpdol_U            | 2.4.1.130 | N-Glycan Biosynthesis                      |                                                                                                    |
| DOLPMT3_Ler  | dolichyl-phosphate-mannose-glycolipid alpha-mannosyltransferase (liver)       | [r] : (0.1) dolmanp_L + (0.1) m6mpdol_L --> (0.1) dolp_L + h + (0.1) m7mpdol_L            | 2.4.1.130 | N-Glycan Biosynthesis                      | 79087.1                                                                                            |
| DOLPMT3_Uer  | dolichyl-phosphate-mannose-glycolipid alpha-mannosyltransferase (uterus)      | [r] : (0.1) dolmanp_U + (0.1) m6mpdol_U --> (0.1) dolp_U + h + (0.1) m7mpdol_U            | 2.4.1.130 | N-Glycan Biosynthesis                      | 79087.1                                                                                            |
| DOLPMT4_Ler  | dolichyl-phosphate-mannose-glycolipid alpha-mannosyltransferase (liver)       | [r] : (0.1) dolmanp_L + (0.1) m7mpdol_L --> (0.1) dolp_L + h + (0.1) m8mpdol_L            | 2.4.1.130 | N-Glycan Biosynthesis                      |                                                                                                    |
| DOLPMT4_Uer  | dolichyl-phosphate-mannose-glycolipid alpha-mannosyltransferase (uterus)      | [r] : (0.1) dolmanp_U + (0.1) m7mpdol_U --> (0.1) dolp_U + h + (0.1) m8mpdol_U            | 2.4.1.130 | N-Glycan Biosynthesis                      |                                                                                                    |
| DOPABMO      | dopamine beta-monoxygenase                                                    | [c] : ascb-L + dopa + o2 --> dhdsacb + h2o + nrpphr                                       | 1.14.17.1 | Tyrosine metabolism                        | (26002.1 or 1621.1)                                                                                |
| DOPACHRMISO  | L-dopachrome isomerase 1                                                      | [c] : (2) 2c23dh56dboxin + o2 --> (2) L-dpchrn + (2) h2o                                  |           | Tyrosine metabolism                        | 7299.1                                                                                             |
| DOPAMT       | Dopamine:arnet O-methyltransferase                                            | [c] : arnet + dopa --> 3moxtyr + ahcys + h                                                | 2.1.1.6   | Tyrosine metabolism                        | (1312.1 or 1312.2)                                                                                 |
| DOPAQNISO1   | Dopaquinone isomerase 1                                                       | [c] : dopaqn <=> 2c23dh56dboxin + h                                                       |           | Tyrosine metabolism                        |                                                                                                    |
| DOPASFi      | Dopamine 3-O-sulfate transport (diffusion)                                    | dopasf[c] --> dopasf[e]                                                                   |           | Transport, Extracellular                   |                                                                                                    |
| DOPASULT     | Dopamine Sulfotransferase                                                     | [c] : dopa + paps --> dopasf + h + pap                                                    | 2.8.2.1   | Tyrosine metabolism                        | (6817.1 or 6817.2 or 6817.3 or 6817.4 or 6817.5 or 6799.1 or 6799.2 or 6818.1 or 6818.2 or 6818.3) |
| DOPA4(2)r    | Dopamine reversible transport in via sodium symport (1:2)                     | dopa[e] + (2) na[e] <=> dopa[c] + (2) na[e]                                               |           | Transport, Extracellular                   | (6530.1 or 6531.1)                                                                                 |
| DOPA4u       | Dopamine uniport                                                              | dopa[e] <=> dopa[c]                                                                       |           | Transport, Extracellular                   | (6582.1 or 6582.2 or 6581.1)                                                                       |
| DOPAVESSEC   | Dopamine secretion via secretory vesicle (ATP driven)                         | (2) atp[c] + (3) dopa[c] + (2) h2o[c] --> (2) adp[c] + (3) dopa[e] + (2) h[c] + (2) pi[c] |           | Transport, Extracellular                   | (6570.1 or 6571.1)                                                                                 |
| DORNOp       | D-ornithine oxidase, peroxisomal                                              | [x] : h2o + o2 + orn-D --> 5a2opntn + h2o2 + nb4                                          | 1.4.3.3   | D-arg and D-orn metabolism                 | 1610.1                                                                                             |
| DPCOAK       | dephospho-CoA kinase                                                          | [c] : atp + dpcoa --> adp + coa + h                                                       | 2.7.1.24  | CoA Biosynthesis                           | 80347.1                                                                                            |
| DPCOAPP      | pyrophosphatase (dephospho-CoA)                                               | [c] : dpcoa + h2o --> amp + (2) h + pan4p                                                 |           | CoA Catabolism                             |                                                                                                    |
| DPCOAtl      | dephospho-CoA transport from lysosome via diffusion                           | dpcoa[l] <=> dpcoa[c]                                                                     |           | Transport, Lysosomal                       |                                                                                                    |
| DPGase       | Diphosphoglycerate phosphatase                                                | [c] : 23dpg + h2o --> 3pg + pi                                                            | 3.1.3.13  | Glycolysis/Gluconeogenesis                 | (5223.1 or 5224.1 or 5224.2 or 669.2 or 669.1)                                                     |
| DPGM         | Diphosphoglyceromutase                                                        | [c] : 13dpg <=> 23dpg + h                                                                 |           | Glycolysis/Gluconeogenesis                 | (5223.1 or 5224.1 or 5224.2 or 669.1 or 669.2)                                                     |
| DPHMBDCm     | 3-Decaprenyl-4-hydroxy-5-methoxybenzoate decarboxylation                      | [m] : 3dpdhb_me + h --> 2dp6mep + co2                                                     |           | Ubiquinone Biosynthesis                    |                                                                                                    |
| DPMVDx       | diphosphomevalonate decarboxylase                                             | [x] : 5dpmev + atp --> adp + co2 + ipdp + pi                                              | 4.1.1.33  | Cholesterol Metabolism                     | 4597.1                                                                                             |
| DPFS         | decaprenyl synthase                                                           | [c] : frdp + (7) ipdp --> decdp + (7) ppi                                                 |           | Miscellaneous                              |                                                                                                    |
| DPROOp       | D-proline oxidase, peroxisomal                                                | [x] : o2 + pro-D --> 1p2cbtl + h + h2o2                                                   |           | Arginine and Proline Metabolism            | 1610.1                                                                                             |
| DRBK         | Deoxyribokinase                                                               | [c] : atp + drib --> 2d5fp + adp + h                                                      | 2.7.1.15  | Pentose Phosphate Pathway                  | 64080.1                                                                                            |
| DRIBt        | deoxyribose transport via diffusion                                           | drib[e] <=> drib[c]                                                                       |           | Transport, Extracellular                   |                                                                                                    |
| DRPA         | deoxyribose-phosphate aldolase                                                | [c] : 2d5fp --> acald + g3p                                                               | 4.1.2.4   | Pentose Phosphate Pathway                  |                                                                                                    |
| DSAT         | dihydrospingosine N-acyltransferase                                           | [c] : Rtotalcoa + sphgn --> coa + dhcrn_hs + h                                            |           | Sphingolipid Metabolism                    |                                                                                                    |
| DTDPn        | dTDP nuclear transport                                                        | dtdp[c] <=> dtdp[n]                                                                       |           | Transport, Nuclear                         |                                                                                                    |
| DTMPK        | dTMP kinase                                                                   | [c] : atp + dtmp <=> adp + dtdp                                                           | 2.7.4.9   | Nucleotides                                | 1841.1                                                                                             |
| DTTPn        | dTTP diffusion in nucleus                                                     | dttp[c] <=> dttp[n]                                                                       |           | Transport, Nuclear                         |                                                                                                    |
| DUDPn        | dUDP nuclear transport                                                        | duudp[c] <=> duudp[n]                                                                     |           | Transport, Nuclear                         |                                                                                                    |
| DUMPn        | dUMP nuclear transport                                                        | dump[c] <=> dump[n]                                                                       |           | Transport, Nuclear                         |                                                                                                    |
| DURAD        | dihydrouracil dehydrogenase (NADP)                                            | [c] : 56dura + nadp <=> h + nadph + ura                                                   | 1.3.1.2   | Pyrimidine Catabolism                      | 1806.1                                                                                             |
| DURAD2       | dihydrothymine dehydrogenase (NADP)                                           | [c] : 56dthm + nadp <=> h + nadph + thym                                                  | 1.3.1.2   | Pyrimidine Catabolism                      | 1806.1                                                                                             |
| DURIK1       | deoxyuridine kinase (ATP:Deoxyuridine)                                        | [c] : atp + duri --> adp + dump + h                                                       |           | Nucleotides                                | (7083.1 or 7084.1)                                                                                 |
| DURIK1m      | deoxyuridine kinase (ATP:Deoxyuridine), mitochondrial                         | [m] : atp + duri --> adp + dump + h                                                       |           | Nucleotides                                | 7084.1                                                                                             |
| DURIIP       | deoxyuridine phosphorylase                                                    | [c] : duri + pi <=> 2dr1p + ura                                                           |           | Nucleotides                                | (4860.1 or 151531.1)                                                                               |
| DURIt        | deoxyuridine transport via diffusion                                          | duri[e] <=> duri[c]                                                                       |           | Transport, Extracellular                   |                                                                                                    |
| DURIn        | deoxyuridine transport in nucleus                                             | duri[c] <=> duri[n]                                                                       |           | Transport, Nuclear                         |                                                                                                    |
| DUTDPn       | dUTP diphosphatase                                                            | [m] : dutp + h2o --> dump + h + ppi                                                       | 3.6.1.23  | Nucleotides                                | 1854.1                                                                                             |
| DUTDPn       | dUTP diphosphatase, nuclear                                                   | [n] : dutp + h2o --> dump + h + ppi                                                       | 3.6.1.23  | Nucleotides                                | 1854.1                                                                                             |
| EAFLATOXIne  | xenobiotic transport                                                          | eaflatoxin[e] <=> eaflatoxin[c]                                                           |           | Transport, Extracellular                   |                                                                                                    |
| EBASTINEOHe  | xenobiotic transport                                                          | ebastineoh[e] <=> ebastineoh[c]                                                           |           | Transport, Extracellular                   |                                                                                                    |
| EBASTINEOhr  | xenobiotic transport                                                          | ebastineoh[r] <=> ebastineoh[c]                                                           |           | Transport, Endoplasmic Reticular           |                                                                                                    |
| EBASTINEe    | xenobiotic transport                                                          | ebastine[e] <=> ebastine[c]                                                               |           | Transport, Extracellular                   |                                                                                                    |
| EBASTINEr    | xenobiotic transport                                                          | ebastine[r] <=> ebastine[c]                                                               |           | Transport, Endoplasmic Reticular           |                                                                                                    |
| EBP1r        | 3-beta-hydroxysteroid-delta(8),delta(7)-isomerase                             | [r] : zymst --> chlstol                                                                   | 5.3.3.5   | Cholesterol Metabolism                     | 10682.1                                                                                            |
| EBP2r        | 3-beta-hydroxysteroid-delta(8),delta(7)-isomerase                             | [r] : zymstnl --> hlbstr                                                                  | 5.3.3.5   | Cholesterol Metabolism                     | 10682.1                                                                                            |
| EGCISO       | Ergonine isomerase (ER)                                                       | [r] : ecgon <=> peegon                                                                    |           | Alkaloid biosynthesis II                   |                                                                                                    |
| ECOAH12m     | 3-hydroxyacyl-CoA dehydratase (3-hydroxyisobutyryl-CoA) (mitochondria)        | [m] : 2mp2coa + h2o <=> 3hibitcoa                                                         | 4.2.1.17  | Valine, Leucine, and Isoleucine Metabolism | (1892.1 or (3030.1 and 3032.1))                                                                    |
| ECOAH1m      | 3-hydroxyacyl-CoA dehydratase (3-hydroxybutanoyl-CoA) (mitochondria)          | [m] : 3hbcoa <=> b2coa + h2o                                                              | 4.2.1.17  | Tryptophan metabolism                      | (549.1 or 1892.1 or (3032.1 and 3030.1))                                                           |
| ECOAH1x      | 3-hydroxyacyl-CoA dehydratase (3-hydroxybutanoyl-CoA) (peroxisome)            | [x] : 3hbcoa <=> b2coa + h2o                                                              | 4.2.1.17  | Tryptophan metabolism                      | (1891.1 or 1962.1)                                                                                 |
| ECOAH9m      | 2-Methylprop-2-enoyl-CoA (2-Methylbut-2-enoyl-CoA), mitochondrial             | [m] : 2mb2coa + h2o <=> 3hmbcoa                                                           | 4.2.1.17  | Valine, Leucine, and Isoleucine Metabolism | (1892.1 or (3030.1 and 3032.1))                                                                    |
| EGMESTr      | ergonine methyl esterase (ER)                                                 | [r] : egme + h2o --> ecgon + h + meoh                                                     |           | Alkaloid biosynthesis II                   | 13.1                                                                                               |
| EHGLAT       | L-erythro-4-Hydroxyglutamate:2-oxoglutarate aminotransferase                  | [c] : agk + e4hglu --> 4h2oglt + glu-L                                                    | 2.6.1.1   | Arginine and Proline Metabolism            | 2805.1                                                                                             |
| EHGLAT2m     | L-erythro-4-Hydroxyglutamate:2-oxoglutarate aminotransferase 2, mitochondrial | [m] : e4hglu + oaa --> 4h2oglt + asp-L                                                    | 2.6.1.21  | Arginine and Proline Metabolism            | 2806.1                                                                                             |
| EHGLATm      | L-erythro-4-Hydroxyglutamate:2-oxoglutarate aminotransferase, mitochondrial   | [m] : agk + e4hglu --> 4h2oglt + glu-L                                                    | 2.6.1.1   | Arginine and Proline Metabolism            | 2806.1                                                                                             |
| EICOSTETCPT1 | carnitine O-palmitoyltransferase                                              | [c] : crn + eicostetcoa --> coa + eicostetern                                             | 2.3.1.21  | Carnitine shuttle                          | (1375.4 or 1374.1 or 126129.1 or 1375.3 or 1375.2 or 1375.1)                                       |

| Abbreviation  | Reaction Name                                                    | Reaction                                                                     | E.C. #   | Pathway                          | Gene association                                                             |
|---------------|------------------------------------------------------------------|------------------------------------------------------------------------------|----------|----------------------------------|------------------------------------------------------------------------------|
| EICOSTETCPT2  | carnitine transferase                                            | [m] : coa + eicostetcrn -> crn + eicostetcoa                                 |          | Carnitine shuttle                | 1376.1                                                                       |
| EICOSTETCRNt  | transport into the mitochondria (carnitine)                      | eicostetcrn[c] -> eicostetcrn[m]                                             |          | Carnitine shuttle                | 788.1                                                                        |
| EICOSTETt     | fatty acid transport via diffusion                               | eicostet[c] <=> eicostet[c]                                                  |          | Transport, Extracellular         |                                                                              |
| ELAIDCPT1     | carnitine O-palmitoyltransferase                                 | [c] : crn + od2coa -> coa + elaidcrn                                         | 2.3.1.21 | Carnitine shuttle                | ( 1375.4 or 1374.1 or 126129.1 or 1375.3 or 1375.2 or 1375.1 )               |
| ELAIDCPT2     | carnitine transferase                                            | [m] : coa + elaidcrn -> crn + od2coa                                         |          | Carnitine shuttle                | 1376.1                                                                       |
| ELAIDCRNt     | transport into the mitochondria (carnitine)                      | elaidcrn[c] -> elaidcrn[m]                                                   |          | Carnitine shuttle                | 788.1                                                                        |
| ELAIDt        | fatty acid transport via diffusion                               | elaid[c] <=> elaid[c]                                                        |          | Transport, Extracellular         |                                                                              |
| ENGASE        | endo-beta-N-acetylglucosaminidase                                | [c] : h2o + s2l2n2m2m -> acgam + s2l2n2m2mm                                  | 3.2.1.96 | N-Glycan Degradation             | 64772.1                                                                      |
| ENGASE2       | endo-beta-N-acetylglucosaminidase                                | [c] : h2o + n2m2nm -> acgam + n2m2nmm                                        | 3.2.1.96 | N-Glycan Degradation             | 64772.1                                                                      |
| ENGASE2ly     | endo-beta-N-acetylglucosaminidase, lysosomal                     | [l] : h2o + n2m2nm -> acgam + n2m2nmm                                        | 3.2.1.96 | N-Glycan Degradation             |                                                                              |
| ENGASE3ly     | endo-beta-N-acetylglucosaminidase, lysosomal                     | [l] : h2o + ksi_deg2 -> acgam + ksi_deg3                                     | 3.2.1.96 | Keratan sulfate degradation      |                                                                              |
| ENGASEly      | endo-beta-N-acetylglucosaminidase, lysosomal                     | [l] : h2o + s2l2n2m2m -> acgam + s2l2n2m2mm                                  | 3.2.1.96 | N-Glycan Degradation             |                                                                              |
| ENMAN1g       | Endomannosidase (glc1man-producing), Golgi apparatus             | [g] : g1m8masn + h2o -> glc1man + m7masnA                                    |          | N-Glycan Biosynthesis            |                                                                              |
| ENMAN2g       | Endomannosidase (glc2man-producing), Golgi apparatus             | [g] : g2m8masn + h2o -> glc2man + m7masnA                                    |          | N-Glycan Biosynthesis            |                                                                              |
| ENMAN3g       | Endomannosidase (glc3man-producing), Golgi apparatus             | [g] : g3m8masn + h2o -> glc3man + m7masnA                                    |          | N-Glycan Biosynthesis            |                                                                              |
| ENMAN4g       | Endomannosidase (mf6masnC-producing), Golgi apparatus            | [g] : g1m7masnC + h2o -> glc1man + mf6masnC                                  |          | N-Glycan Biosynthesis            |                                                                              |
| ENMAN5g       | Endomannosidase (mf6masnB2-producing), Golgi apparatus           | [g] : g1m7masnB + h2o -> glc1man + mf6masnB2                                 |          | N-Glycan Biosynthesis            |                                                                              |
| ENMAN6g       | Endomannosidase (m5masnB1-producing), Golgi apparatus            | [g] : g1m6masnB1 + h2o -> glc1man + m5masnB1                                 |          | N-Glycan Biosynthesis            |                                                                              |
| ENO           | enolase                                                          | [c] : 2pg <=> h2o + pep                                                      | 4.2.1.11 | Glycolysis/Gluconeogenesis       | ( 2027.1 or 2027.2 or 26237.1 or 2023.1 or 2026.1 )                          |
| EPCTX         | ethanolamine-phosphate cytidylyltransferase                      | [c] : 2ameph + ctp + h -> cmp2amep + ppi                                     | 2.7.7.14 | Glycerophospholipid Metabolism   | 5833.1                                                                       |
| ESTRADIOLGLCt | estradiol glucuronide transport via bicarbonate countertransport | estradiolglc[e] + hco3[c] <=> estradiolglc[c] + hco3[e]                      |          | Transport, Extracellular         | ( 28231.1 or 6579.1 or 10599.1 or 28234.1 or 53919.1 )                       |
| ESTRADIOLGLC2 | 17-beta-D-glucuronide transport (ATP-dependent)                  | atp[c] + estradiolglc[c] + h2o[c] -> adp[c] + estradiolglc[e] + h[c] + pi[c] |          | Transport, Extracellular         | 10257.1                                                                      |
| ESTRADIOLGLCt | glucuronidated compound transport                                | estradiolglc[c] <=> estradiolglc[r]                                          |          | Transport, Endoplasmic Reticular |                                                                              |
| ESTRADIOLr    | estradiol intracellular transport                                | estradiol[r] <=> estradiol[c]                                                |          | Transport, Endoplasmic Reticular |                                                                              |
| ESTRIOLGLCt   | glucuronidated compound transport                                | atp[c] + estriolglc[c] + h2o[c] -> adp[c] + estriolglc[e] + h[c] + pi[c]     |          | Transport, Extracellular         | 4363.1                                                                       |
| ESTRIOLGLCt   | glucuronidated compound transport                                | estriolglc[c] <=> estriolglc[r]                                              |          | Transport, Endoplasmic Reticular |                                                                              |
| ESTRIOLr      | estriol intracellular transport                                  | estriol[r] <=> estriol[c]                                                    |          | Transport, Endoplasmic Reticular |                                                                              |
| ESTRONEGLCt   | ABC transporter                                                  | atp[c] + estroneglc[c] + h2o[c] -> adp[c] + estroneglc[e] + h[c] + pi[c]     |          | Transport, Extracellular         | ( 8714.1 or 8714.2 or 8714.3 )                                               |
| ESTRONEGLCt   | glucuronidated compound transport                                | estroneglc[c] <=> estroneglc[r]                                              |          | Transport, Endoplasmic Reticular |                                                                              |
| ESTRONESt     | estrone 3-sulfate transport via bicarbonate countertransport     | estrones[e] + hco3[c] <=> estrones[c] + hco3[e]                              |          | Transport, Extracellular         | ( 28231.1 or 6579.1 or 10599.1 or 28234.1 or 11309.1 or 28232.1 or 53919.1 ) |
| ESTRONES2     | estrone-3-sulfate transport via sodium cotransport               | estrones[c] + (2) na1[c] -> estrones[c] + (2) na1[c]                         |          | Transport, Extracellular         | 6554.1                                                                       |
| ESTRONEr      | estrone intracellular transport                                  | estrone[r] <=> estrone[c]                                                    |          | Transport, Endoplasmic Reticular |                                                                              |
| ESTSULT       | Estrogen sulfotransferase                                        | [c] : estrone + paps -> estrones + h + pap                                   | 2.8.2.4  | Steroid Metabolism               | ( 6817.1 or 6817.2 or 6817.3 or 6817.4 or 6817.5 or 6783.1 )                 |
| ETF           | electron transfer flavoprotein                                   | [m] : etfox + fadh2 -> etfrd + fad                                           |          | Fatty acid oxidation             | ( ( 2108.1 and 2109.2 ) or ( 2108.1 and 2109.1 ) )                           |
| ETFQO         | Electron transfer flavoprotein-ubiquinone oxidoreductase         | [m] : etfrd + q10 -> etfox + q10h2                                           | 1.5.5.1  | Fatty acid oxidation             | 2110.1                                                                       |
| ETHAK         | Ethanolamine kinase                                              | [c] : atp + etha -> adhamp + h                                               | 2.7.1.82 | Glycerophospholipid Metabolism   | ( 55500.1 or 55224.1 or 11191.1 or 1119.2 )                                  |
| ETHP          | ethanolamine phosphate phosphatase                               | [c] : ethamp + h2o -> etha + pi                                              |          | Glycerophospholipid Metabolism   | 162466.1                                                                     |
| ETOHMO        | ethanol monooxygenase                                            | [c] : etoh + h + nadph + o2 -> acald + (2) h2o + nadp                        |          | Glycolysis/Gluconeogenesis       | 1571.1                                                                       |
| ETOHt         | ethanol reversible transport                                     | etoh[c] <=> etoh[e]                                                          |          | Transport, Extracellular         |                                                                              |
| ETOHx         | ethanol reversible peroxisomal transport                         | etoh[c] <=> etoh[x]                                                          |          | Transport, Peroxisomal           |                                                                              |
| F1PGT         | fructose-1-phosphate guanylyltransferase                         | [c] : fuc1p-L + gtp + h <=> gdpfuc + ppi                                     | 2.7.7.30 | Fructose and Mannose Metabolism  | 8790.1                                                                       |
| F6Tg          | glycoprotein 6-alpha-L-fucosyltransferase                        | [g] : gdpfuc + n2m2masn -> f6m2masn + gdp + h                                | 2.4.1.68 | N-Glycan Biosynthesis            | ( 2530.1 or 2530.2 or 2530.3 or 2530.4 or 2530.5 )                           |
| FA120ACPH     | fatty-acyl-ACP hydrolase                                         | [c] : ddcaACP + h2o <=> ACP + ddca + h                                       | 3.1.2.14 | Fatty Acid Metabolism            | 5530.1                                                                       |
| FA140ACPH     | fatty-acyl-ACP hydrolase                                         | [c] : h2o + myrsACP <=> ACP + h + tdca                                       | 3.1.2.14 | Fatty Acid Metabolism            | 5530.1                                                                       |
| FA141ACPH     | fatty-acyl-ACP hydrolase                                         | [c] : h2o + tdeACP <=> ACP + h + tdca                                        | 3.1.2.14 | Fatty Acid Metabolism            | 5530.1                                                                       |
| FA160ACPH     | fatty-acyl-ACP hydrolase                                         | [c] : h2o + palmACP <=> ACP + h + hdca                                       | 3.1.2.14 | Fatty Acid Metabolism            | 5530.1                                                                       |
| FA161ACPH     | fatty-acyl-ACP hydrolase                                         | [c] : h2o + hdeACP <=> ACP + h + hdca                                        | 3.1.2.14 | Fatty Acid Metabolism            | 5530.1                                                                       |
| FA180ACPH     | fatty-acyl-ACP hydrolase                                         | [c] : h2o + ocdcaACP <=> ACP + h + ocdca                                     | 3.1.2.14 | Fatty Acid Metabolism            | 5530.1                                                                       |
| FA181ACPH     | fatty-acyl-ACP hydrolase                                         | [c] : h2o + octeACP <=> ACP + h + ocdca                                      | 3.1.2.14 | Fatty Acid Metabolism            | 5530.1                                                                       |
| FA1821ACPH    | fatty-acyl-ACP hydrolase                                         | [c] : h2o + lnldACP <=> ACP + h + lnld                                       | 3.1.2.14 | Fatty Acid Metabolism            | 5530.1                                                                       |
| FA1822ACPH    | fatty-acyl-ACP hydrolase                                         | [c] : h2o + lnldcACP <=> ACP + h + lnldc                                     | 3.1.2.14 | Fatty Acid Metabolism            | 5530.1                                                                       |
| FA182ACPH     | fatty-acyl-ACP hydrolase                                         | [c] : h2o + ocdyaACP <=> ACP + h + ocdya                                     | 3.1.2.14 | Fatty Acid Metabolism            | 5530.1                                                                       |
| FACOAL140i    | fatty-acid-CoA ligase (tetradecanoate)                           | [c] : atp + coa + tdca -> amp + ppi + tdcoa                                  | 6.2.1.3  | Fatty acid activation            | 2181.1                                                                       |
| FACOAL150     | fatty-acid-CoA ligase                                            | [c] : atp + coa + ptcca <=> amp + ppi + ptccacoa                             | 6.2.1.3  | Fatty acid activation            | ( 2180.1 or 2181.1 or 2181.2 or 2181.3 or 22305.1 or 22305.2 )               |
| FACOAL160i    | C160 fatty acid activation                                       | [c] : atp + coa + hdca -> amp + pmtcoa + ppi                                 | 6.2.1.3  | Fatty acid activation            | ( 51703.1 or 2180.1 or 22305.1 or 22305.2 or 2181.1 or 2181.2 )              |
| FACOAL161     | fatty-acid-CoA ligase (hexadecanoate)                            | [c] : atp + coa + hdca <=> amp + hdcoa + ppi                                 | 6.2.1.3  | Fatty acid activation            | 2180.1                                                                       |
| FACOAL170     | fatty-acid-CoA ligase                                            | [c] : atp + coa + hpcca <=> amp + hpccacoa + ppi                             | 6.2.1.3  | Fatty acid activation            | ( 2180.1 or 2181.1 or 2181.2 or 2181.3 or 22305.1 or 22305.2 )               |

| Abbreviation  | Reaction Name                                        | Reaction                                                                                                       | E.C. #   | Pathway                          | Gene association                                                                                                                 |
|---------------|------------------------------------------------------|----------------------------------------------------------------------------------------------------------------|----------|----------------------------------|----------------------------------------------------------------------------------------------------------------------------------|
| FACOAL180i    | C180 fatty acid activation                           | [c] : atp + coa + odcca --> amp + ppi + stcoa                                                                  | 6.2.1.3  | Fatty acid activation            | ( 51703.1 or 2180.1 or 2181.1 or 2181.2 or 22305.1 or 22305.2 )                                                                  |
| FACOAL1812    | fatty-acid-CoA ligase                                | [c] : atp + coa + vace <=> amp + ppi + vaccecoa                                                                | 6.2.1.3  | Fatty acid activation            | 2180.1                                                                                                                           |
| FACOAL1813    | fatty-acid-CoA ligase                                | [c] : atp + coa + elaid <=> amp + od2coa + ppi                                                                 | 6.2.1.3  | Fatty acid activation            | 2180.1                                                                                                                           |
| FACOAL181i    | C181 fatty acid activation                           | [c] : atp + coa + odceca --> amp + odcecoa + ppi                                                               | 6.2.1.3  | Fatty acid activation            | ( 2180.1 or 2181.1 or 2181.2 )                                                                                                   |
| FACOAL1821    | fatty-acid-CoA ligase                                | [c] : atp + coa + hlc <=> amp + hlccecoa + ppi                                                                 | 6.2.1.3  | Fatty acid activation            | 2180.1                                                                                                                           |
| FACOAL1822    | fatty-acid-CoA ligase                                | [c] : atp + coa + hneldc <=> amp + hnelccecoa + ppi                                                            | 6.2.1.3  | Fatty acid activation            | 2180.1                                                                                                                           |
| FACOAL1831    | fatty-acid-CoA ligase                                | [c] : atp + coa + lnlncc <=> amp + lnlncccecoa + ppi                                                           | 6.2.1.3  | Fatty acid activation            | 2180.1                                                                                                                           |
| FACOAL1832    | fatty-acid-CoA ligase                                | [c] : atp + coa + lnlnca <=> amp + lnlncacecoa + ppi                                                           | 6.2.1.3  | Fatty acid activation            | 2180.1                                                                                                                           |
| FACOAL184     | fatty-acid-CoA ligase                                | [c] : atp + coa + strdnc <=> amp + ppi + strdnccoa                                                             | 6.2.1.3  | Fatty acid activation            | 2180.1                                                                                                                           |
| FACOAL191     | fatty-acid-CoA ligase                                | [c] : atp + coa + prist --> amp + ppi + pristcoa                                                               | 6.2.1.3  | Fatty acid activation            | 11001.1                                                                                                                          |
| FACOAL200     | fatty-acid-CoA ligase                                | [c] : arach + atp + coa <=> amp + arachcecoa + ppi                                                             | 6.2.1.3  | Fatty acid activation            | 2180.1                                                                                                                           |
| FACOAL203     | fatty-acid-CoA ligase                                | [c] : atp + coa + dlnlcc <=> amp + dlnlcccecoa + ppi                                                           | 6.2.1.3  | Fatty acid activation            | 2180.1                                                                                                                           |
| FACOAL204     | fatty-acid-CoA ligase                                | [c] : arachd + atp + coa <=> amp + arachdcecoa + ppi                                                           | 6.2.1.3  | Fatty acid activation            | 2180.1                                                                                                                           |
| FACOAL2042    | fatty-acid-CoA ligase                                | [c] : atp + coa + eicostet <=> amp + eicostetcecoa + ppi                                                       | 6.2.1.3  | Fatty acid activation            | 2180.1                                                                                                                           |
| FACOAL204i    | arachidonic acid activation                          | [c] : arachd + atp + coa --> amp + arachdcoa + ppi                                                             | 6.2.1.3  | Fatty acid activation            | ( 2181.1 or 2182.1 or 2180.1 or 2181.2 or 2182.2 or 22305.1 or 22305.2 )                                                         |
| FACOAL205     | fatty-acid-CoA ligase                                | [c] : atp + coa + tmdncc <=> amp + ppi + tmdncccecoa                                                           | 6.2.1.3  | Fatty acid activation            | 2180.1                                                                                                                           |
| FACOAL206     | fatty-acid-CoA ligase                                | [c] : atp + coa + phyt <=> amp + phytcecoa + ppi                                                               | 6.2.1.3  | Fatty acid activation            | 11001.1                                                                                                                          |
| FACOAL224     | fatty-acid-CoA ligase                                | [c] : adm + atp + coa <=> adrncoa + amp + ppi                                                                  | 6.2.1.3  | Fatty acid activation            | 2180.1                                                                                                                           |
| FACOAL2251    | fatty-acid-CoA ligase                                | [c] : atp + coa + dcsptn1 <=> amp + dcsptn1coa + ppi                                                           | 6.2.1.3  | Fatty acid activation            | 2180.1                                                                                                                           |
| FACOAL2252    | fatty-acid-CoA ligase                                | [c] : atp + clpnd + coa <=> amp + clpndcecoa + ppi                                                             | 6.2.1.3  | Fatty acid activation            | 2180.1                                                                                                                           |
| FACOAL226     | fatty-acid-CoA ligase                                | [c] : atp + coa + crvnc <=> amp + c226cecoa + ppi                                                              | 6.2.1.3  | Fatty acid activation            | 2180.1                                                                                                                           |
| FACOAL226i    | C226 fatty acid activation                           | [c] : atp + coa + crvnc --> amp + c226cecoa + ppi                                                              | 6.2.1.3  | Fatty acid activation            | 2180.1                                                                                                                           |
| FACOAL240     | fatty-acid-CoA ligase                                | [c] : atp + coa + lgncc <=> amp + lgncccecoa + ppi                                                             | 6.2.1.3  | Fatty acid activation            | 2180.1                                                                                                                           |
| FACOAL241     | fatty-acid-CoA ligase                                | [c] : atp + coa + nrvnc <=> amp + nrvnccecoa + ppi                                                             | 6.2.1.3  | Fatty acid activation            | 2180.1                                                                                                                           |
| FACOAL244_1   | fatty-acid-CoA ligase                                | [c] : atp + coa + tetet6 <=> amp + ppi + tetet6cecoa                                                           | 6.2.1.3  | Fatty acid activation            | 2180.1                                                                                                                           |
| FACOAL245_1   | fatty-acid-CoA ligase                                | [c] : atp + coa + tetpent6 <=> amp + ppi + tetpent6cecoa                                                       | 6.2.1.3  | Fatty acid activation            | 2180.1                                                                                                                           |
| FACOAL245_2   | fatty-acid-CoA ligase                                | [c] : atp + coa + tetpent3 <=> amp + ppi + tetpent3cecoa                                                       | 6.2.1.3  | Fatty acid activation            | 2180.1                                                                                                                           |
| FACOAL246_1   | fatty-acid-CoA ligase                                | [c] : atp + coa + tethex3 <=> amp + ppi + tethex3cecoa                                                         | 6.2.1.3  | Fatty acid activation            | 2180.1                                                                                                                           |
| FACOAL260     | fatty-acid-CoA ligase (n-C26:0)                      | [c] : atp + coa + hexcc <=> amp + hexcecoa + ppi                                                               | 6.2.1.3  | Fatty acid activation            | 2180.1                                                                                                                           |
| FACOAL40im    | fatty-acid-CoA ligase (butanoate), mitochondrial     | [m] : atp + but + coa --> amp + btcoa + ppi                                                                    | 6.2.1.2  | Fatty acid activation            | 116285.1                                                                                                                         |
| FACOAL80i     | fatty-acid-CoA ligase (octanoate)                    | [c] : atp + coa + octa --> amp + octcoa + ppi                                                                  | 6.2.1.2  | Fatty acid activation            | ( 2181.1 or 2181.2 )                                                                                                             |
| FADDP         | FAD diphosphatase                                    | [c] : fad + h2o --> amp + fmn + (2) h                                                                          | 3.6.1.9  | Riboflavin Metabolism            | 5167.1                                                                                                                           |
| FADH2ru       | FADH2 transporter, endoplasmic reticulum             | fadh2[c] --> fadh2[r]                                                                                          |          | Transport, Endoplasmic Reticular |                                                                                                                                  |
| FADH2rx       | FADH2 transporter, peroxisomal                       | fadh2[c] <=> fadh2[x]                                                                                          |          | Transport, Peroxisomal           |                                                                                                                                  |
| FADru         | FAD transporter, endoplasmic reticulum               | fad[r] --> fad[c]                                                                                              |          | Transport, Endoplasmic Reticular |                                                                                                                                  |
| FADrx         | FAD transporter, peroxisomal                         | fad[c] <=> fad[x]                                                                                              |          | Transport, Peroxisomal           |                                                                                                                                  |
| FAEL183       | fatty-acyl-CoA elongation (n-C18:3CoA)               | [c] : (5) h + lnlncccecoa + malcoa + (4) nadph + o2 --> co2 + coa + dlnlcccecoa + (3) h2o + (4) nadp           | 2.3.1.86 | Fatty acid elongation            | 6785.1                                                                                                                           |
| FAEL184       | fatty-acyl-CoA elongation (n-C20:4CoA)               | [c] : (5) h + malcoa + (4) nadph + o2 + strdncccecoa --> co2 + coa + eicostetcecoa + (3) h2o + (4) nadp        | 2.3.1.86 | Fatty acid elongation            | 6785.1                                                                                                                           |
| FAEL204       | fatty-acyl-CoA elongation (n-C20:4CoA)               | [c] : arachdcecoa + (5) h + malcoa + (4) nadph + o2 --> adrncoa + co2 + coa + (3) h2o + (4) nadp               | 2.3.1.86 | Fatty acid elongation            | 6785.1                                                                                                                           |
| FAEL205       | fatty-acyl-CoA elongation (n-C20:5CoA)               | [c] : (5) h + malcoa + (4) nadph + o2 + tmdncccecoa --> clpndcecoa + co2 + coa + (3) h2o + (4) nadp            | 2.3.1.86 | Fatty acid elongation            | 6785.1                                                                                                                           |
| FAH1          | Fatty acid omega-hydroxylase                         | [c] : ddca + h + nadph + o2 --> h2o + nadp + whhdca                                                            |          | CYP Metabolism                   | 1579.1                                                                                                                           |
| FAH2          | Fatty acid omega-hydroxylase                         | [c] : h + nadph + o2 + tdca --> h2o + nadp + whtdca                                                            |          | CYP Metabolism                   | 1579.1                                                                                                                           |
| FAH3          | Fatty acid omega-hydroxylase                         | [c] : h + hdca + nadph + o2 --> h2o + nadp + whhdca                                                            |          | CYP Metabolism                   | 1579.1                                                                                                                           |
| FALDH         | formaldehyde dehydrogenase                           | [c] : fald + gthrd + nad <=> Slgluth + h + nadh                                                                | 1.2.1.1  | Tyrosine metabolism              | 128.1                                                                                                                            |
| FALDly        | formaldehyde transport via diffusion (lysosomal)     | fald[l] <=> fald[c]                                                                                            |          | Transport, Lysosomal             |                                                                                                                                  |
| FALDm         | formaldehyde transport via diffusion (mitochondrial) | fald[m] <=> fald[c]                                                                                            |          | Transport, Mitochondrial         |                                                                                                                                  |
| FAOXC11       | Beta oxidation of long chain fatty acid              | [m] : coa + dmnoncecoa + h2o + nad --> accoa + dmhptcecoa + h + nadh                                           | 1.3.99.3 | Fatty acid oxidation             | 34.1                                                                                                                             |
| FAOXC140      | Beta oxidation of long chain fatty acid              | [m] : (6) coa + (6) fad + (6) h2o + (6) nad + tdcoa --> (7) accoa + (6) fadh2 + (6) h + (6) nadh               | 1.3.99.3 | Fatty acid oxidation             | ( 35.1 or 34.1 )                                                                                                                 |
| FAOXC150m     | Beta oxidation of long chain fatty acid (odd chain)  | [m] : (6) coa + (6) fad + (6) h2o + (6) nad + ptdecoa --> (6) accoa + (6) fadh2 + (6) h + (6) nadh + ppecoa    | 1.3.99.3 | Fatty acid oxidation             | ( 35.1 or 34.1 )                                                                                                                 |
| FAOXC160      | Beta oxidation of long chain fatty acid              | [m] : (7) coa + (7) fad + (7) h2o + (7) nad + pmtecoa --> (8) accoa + (7) fadh2 + (7) h + (7) nadh             | 1.3.99.3 | Fatty acid oxidation             | ( 34.1 or 35.1 )                                                                                                                 |
| FAOXC16080m   | Beta oxidation of long chain fatty acid              | [m] : (4) coa + (4) fad + (4) h2o + (4) nad + pmtecoa --> (4) accoa + (4) fadh2 + (4) h + (4) nadh + occoa     | 1.3.99.3 | Fatty acid oxidation             | ( 35.1 or 34.1 )                                                                                                                 |
| FAOXC16080x   | Beta oxidation of long chain fatty acid              | [x] : (4) coa + (4) h2o + (4) nad + (4) o2 + pmtecoa --> (4) accoa + (4) h + (4) h2o2 + (4) nadh + occoa       | 1.3.99.3 | Fatty acid oxidation, peroxisome | ( ( 51.1 and 1962.1 and 30.1 ) or ( 51.2 and 30.1 and 3295.1 ) or ( 1962.1 and 51.2 and 30.1 ) or ( 51.1 and 30.1 and 3295.1 ) ) |
| FAOXC161802m  | Beta oxidation fatty acid                            | [m] : (4) coa + (3) fad + (4) h2o + hdd2cecoa + (4) nad --> (4) accoa + (3) fadh2 + (4) h + (4) nadh + occoa   | 1.3.99.3 | Fatty acid activation            | ( 34.1 or 35.1 )                                                                                                                 |
| FAOXC16180m   | Beta oxidation fatty acid                            | [m] : (4) coa + (3) fad + (4) h2o + hdcecoa + (4) nad --> (4) accoa + (3) fadh2 + (4) h + (4) nadh + occoa     | 1.3.99.3 | Fatty acid oxidation             | ( 35.1 or 34.1 )                                                                                                                 |
| FAOXC170m     | Beta oxidation of long chain fatty acid (odd chain)  | [m] : (7) coa + (7) fad + (7) h2o + hpdcccecoa + (7) nad --> (7) accoa + (7) fadh2 + (7) h + (7) nadh + ppecoa | 1.3.99.3 | Fatty acid oxidation             | 34.1                                                                                                                             |
| FAOXC180      | Beta oxidation of long chain fatty acid              | [m] : coa + fad + h2o + nad + stcoa --> accoa + fadh2 + h + nadh + pmtecoa                                     | 1.3.99.3 | Fatty acid oxidation             | ( 35.1 or 34.1 or 34.1 or 35.1 )                                                                                                 |
| FAOXC180x     | Beta oxidation of long chain fatty acid              | [x] : coa + h2o + nad + o2 + stcoa --> accoa + h + h2o2 + nadh + pmtecoa                                       | 1.3.99.3 | Fatty acid oxidation, peroxisome | ( ( 51.1 and 1962.1 and 30.1 ) or ( 51.2 and 30.1 and 3295.1 ) or ( 1962.1 and 51.2 and 30.1 ) or ( 51.1 and 30.1 and 3295.1 ) ) |
| FAOXC1811601m | Beta oxidation fatty acid                            | [m] : (5) coa + (4) fad + (5) h2o + (5) nad + od2coa --> (5) accoa + (4) fadh2 + (5) h + (5) nadh + occoa      | 1.3.99.3 | Fatty acid oxidation             | ( 35.1 or 34.1 )                                                                                                                 |
| FAOXC1811602m | Beta oxidation fatty acid                            | [m] : (5) coa + (4) fad + (5) h2o + (5) nad + vaccecoa --> (5) accoa + (4) fadh2 + (5) h + (5) nadh + occoa    | 1.3.99.3 | Fatty acid oxidation             | ( 35.1 or 34.1 )                                                                                                                 |



| Abbreviation  | Reaction Name                           | Reaction                                                                                                        | E.C. #   | Pathway                          | Gene association                                                                                                            |
|---------------|-----------------------------------------|-----------------------------------------------------------------------------------------------------------------|----------|----------------------------------|-----------------------------------------------------------------------------------------------------------------------------|
| FAOXC1811603m | Beta oxidation fatty acid               | [m] : (5) coa + (4) fad + (5) h2o + (5) nad + odecocoa --> (5) accocoa + (4) fadh2 + (5) h + (5) nadh + occocoa | 1.3.99.3 | Fatty acid oxidation             | (34.1 or 35.1)                                                                                                              |
| FAOXC182806m  | Beta oxidation of fatty acid            | [m] : (5) coa + (3) fad + (5) h2o + lnecocoa + (5) nad --> (5) accocoa + (3) fadh2 + (5) h + (5) nadh + occocoa | 1.3.99.3 | Fatty acid oxidation             | (34.1 or 35.1)                                                                                                              |
| FAOXC18280m   | Beta oxidation of fatty acid            | [m] : (5) coa + (3) fad + (5) h2o + lnecocoa + (5) nad --> (5) accocoa + (3) fadh2 + (5) h + (5) nadh + occocoa | 1.3.99.3 | Fatty acid oxidation             | (34.1 or 35.1)                                                                                                              |
| FAOXC183803m  | Beta oxidation of fatty acid            | [m] : (5) coa + (2) fad + (5) h2o + lnecocoa + (5) nad --> (5) accocoa + (2) fadh2 + (5) h + (5) nadh + occocoa | 1.3.99.3 | Fatty acid oxidation             | (34.1 or 35.1)                                                                                                              |
| FAOXC183806m  | Beta oxidation of fatty acid            | [m] : (5) coa + (5) h2o + lnecocoa + (5) nad + (2) o2 --> (5) accocoa + (5) h + (2) h2o2 + (5) nadh + occocoa   | 1.3.99.3 | Fatty acid oxidation             | (34.1 or 35.1)                                                                                                              |
| FAOXC183806x  | Beta oxidation of long chain fatty acid | [x] : (5) coa + (5) h2o + lnecocoa + (5) nad + (2) o2 --> (5) accocoa + (5) h + (2) h2o2 + (5) nadh + occocoa   | 1.3.99.3 | Fatty acid oxidation, peroxisome | (( (1962.1 and 51.2 and 30.1) or (51.1 and 1962.1 and 30.1) or (51.1 and 30.1 and 3295.1) or (51.2 and 30.1 and 3295.1) ) ) |
| FAOXC18480m   | Beta oxidation of fatty acid            | [m] : (5) coa + fad + (5) h2o + (5) nad + strdnecocoa --> (5) accocoa + fadh2 + (5) h + (5) nadh + occocoa      | 1.3.99.3 | Fatty acid oxidation             | (34.1 or 35.1)                                                                                                              |
| FAOXC18480x   | Beta oxidation of long chain fatty acid | [x] : (5) coa + (5) h2o + (5) nad + o2 + strdnecocoa --> (5) accocoa + (5) h + h2o2 + (5) nadh + occocoa        | 1.3.99.3 | Fatty acid oxidation, peroxisome | (( (1962.1 and 51.2 and 30.1) or (51.2 and 30.1 and 3295.1) or (51.1 and 1962.1 and 30.1) or (51.1 and 30.1 and 3295.1) ) ) |
| FAOXC200180m  | Beta oxidation of long chain fatty acid | [m] : arachocoa + coa + fad + h2o + nad --> accocoa + fadh2 + h + nadh + stocoa                                 | 1.3.99.3 | Fatty acid oxidation             | (35.1 or 34.1)                                                                                                              |
| FAOXC200180x  | Beta oxidation of long chain fatty acid | [x] : arachocoa + coa + h2o + nad + o2 --> accocoa + h + h2o2 + nadh + stocoa                                   | 1.3.99.3 | Fatty acid oxidation, peroxisome | (( (51.1 and 1962.1 and 30.1) or (1962.1 and 51.2 and 30.1) or (51.1 and 30.1 and 3295.1) or (51.2 and 30.1 and 3295.1) ) ) |
| FAOXC2031836m | Beta oxidation of fatty acid            | [m] : coa + dnecocoa + fad + h2o + nad --> accocoa + fadh2 + h + lnecocoa + nadh                                | 1.3.99.3 | Fatty acid oxidation             | (35.1 or 34.1)                                                                                                              |
| FAOXC204      | Beta oxidation of long chain fatty acid | [m] : arachocoa + (9) coa + (5) fad + (9) h2o + (9) nad --> (10) accocoa + (5) fadh2 + (9) h + (9) nadh         | 1.3.99.3 | Fatty acid oxidation             | (34.1 or 35.1 or 35.1 or 34.1)                                                                                              |
| FAOXC204184m  | Beta oxidation fatty acid               | [m] : coa + eicosocoa + fad + h2o + nad --> accocoa + fadh2 + h + nadh + strdnecoa                              | 1.3.99.3 | Fatty acid oxidation             | (35.1 or 34.1)                                                                                                              |
| FAOXC2051843m | Beta oxidation of fatty acid            | [m] : coa + h2o + nad + tmndnecoa --> accocoa + h + nadh + strdnecoa                                            | 1.3.99.3 | Fatty acid oxidation             | (34.1 or 35.1)                                                                                                              |
| FAOXC2051843x | Beta oxidation of long chain fatty acid | [x] : coa + h2o + nad + tmndnecoa --> accocoa + h + nadh + strdnecoa                                            | 1.3.99.3 | Fatty acid oxidation, peroxisome | (( (51.1 and 30.1 and 3295.1) or (51.2 and 30.1 and 3295.1) or (51.1 and 1962.1 and 30.1) or (1962.1 and 51.2 and 30.1) ) ) |
| FAOXC2242046m | Beta oxidation of long chain fatty acid | [m] : adrmcooa + coa + fad + h2o + nad --> accocoa + arachdcooa + fadh2 + h + nadh                              | 1.3.99.3 | Fatty acid oxidation             | (34.1 or 35.1)                                                                                                              |
| FAOXC2242046x | Beta oxidation of long chain fatty acid | [x] : adrmcooa + coa + h2o + nad + o2 --> accocoa + arachdcooa + h + h2o2 + nadh                                | 1.3.99.3 | Fatty acid oxidation, peroxisome | (( (51.1 and 1962.1 and 30.1) or (51.1 and 30.1 and 3295.1) or (1962.1 and 51.2 and 30.1) or (51.2 and 30.1 and 3295.1) ) ) |
| FAOXC2251836m | Beta oxidation of fatty acid            | [m] : (2) coa + desptn1cooa + (2) h2o + (2) nad --> (2) accocoa + (2) h + lnecocoa + (2) nadh                   | 1.3.99.3 | Fatty acid oxidation             | (34.1 or 35.1)                                                                                                              |
| FAOXC2251836x | Beta oxidation of long chain fatty acid | [x] : (2) coa + desptn1cooa + (2) h2o + (2) nad --> (2) accocoa + (2) h + lnecocoa + (2) nadh                   | 1.3.99.3 | Fatty acid oxidation, peroxisome | (( (51.1 and 1962.1 and 30.1) or (1962.1 and 51.2 and 30.1) or (51.1 and 30.1 and 3295.1) or (51.2 and 30.1 and 3295.1) ) ) |
| FAOXC2252053m | Beta oxidation of long chain fatty acid | [m] : coa + desptn1cooa + h2o + nad + o2 --> accocoa + h + h2o2 + nadh + tmndnecoa                              | 1.3.99.3 | Fatty acid oxidation             | (35.1 or 34.1)                                                                                                              |
| FAOXC2252053x | Beta oxidation of long chain fatty acid | [x] : coa + desptn1cooa + h2o + nad + o2 --> accocoa + h + h2o2 + nadh + tmndnecoa                              | 1.3.99.3 | Fatty acid oxidation, peroxisome | (( (1962.1 and 51.2 and 30.1) or (51.2 and 30.1 and 3295.1) or (51.1 and 1962.1 and 30.1) or (51.1 and 30.1 and 3295.1) ) ) |
| FAOXC226      | Beta oxidation of long chain fatty acid | [m] : c226cooa + (10) coa + (4) fad + (10) h2o + (10) nad --> (11) accocoa + (4) fadh2 + (10) h + (10) nadh     | 1.3.99.3 | Fatty acid oxidation             | (35.1 or 34.1)                                                                                                              |
| FAOXC226205m  | Beta oxidation of long chain fatty acid | [m] : c226cooa + coa + h2o + nad --> accocoa + h + nadh + tmndnecoa                                             | 1.3.99.3 | Fatty acid oxidation             | (35.1 or 34.1)                                                                                                              |
| FAOXC226205x  | Beta oxidation of long chain fatty acid | [x] : c226cooa + coa + h2o + nad --> accocoa + h + nadh + tmndnecoa                                             | 1.3.99.3 | Fatty acid oxidation, peroxisome | (( (51.1 and 30.1 and 3295.1) or (51.1 and 1962.1 and 30.1) or (1962.1 and 51.2 and 30.1) or (51.2 and 30.1 and 3295.1) ) ) |
| FAOXC240200x  | Beta oxidation of long chain fatty acid | [x] : (2) coa + (2) h2o + lnecocoa + (2) nad + (2) o2 --> (2) accocoa + arachocoa + (2) h + (2) h2o2 + (2) nadh | 1.3.99.3 | Fatty acid oxidation, peroxisome | (( (1962.1 and 51.2 and 30.1) or (51.2 and 30.1 and 3295.1) or (51.1 and 1962.1 and 30.1) or (51.1 and 30.1 and 3295.1) ) ) |
| FAOXC241181x  | Beta oxidation of long chain fatty acid | [x] : (3) coa + (3) h2o + (3) nad + nrnecocoa + (3) o2 --> (3) accocoa + (3) h + (3) h2o2 + (3) nadh + odecocoa | 1.3.99.3 | Fatty acid oxidation, peroxisome | (( (51.1 and 1962.1 and 30.1) or (1962.1 and 51.2 and 30.1) or (51.1 and 30.1 and 3295.1) or (51.2 and 30.1 and 3295.1) ) ) |

| Abbreviation  | Reaction Name                                             | Reaction                                                                                        | E.C. #   | Pathway                                 | Gene association                                                                                                                |
|---------------|-----------------------------------------------------------|-------------------------------------------------------------------------------------------------|----------|-----------------------------------------|---------------------------------------------------------------------------------------------------------------------------------|
| FAOXC2442246x | Beta oxidation of long chain fatty acid                   | [x] : coa + h2o + nad + o2 + tetpet6coa -> accoa + admcoa + h + h2o2 + nadh                     | 1.3.99.3 | Fatty acid oxidation, peroxisome        | (( 51.1 and 1962.1 and 30.1 ) or ( 51.2 and 30.1 and 3295.1 ) or ( 1962.1 and 51.2 and 30.1 ) or ( 51.1 and 30.1 and 3295.1 ) ) |
| FAOXC2452253x | Beta oxidation of long chain fatty acid                   | [x] : coa + h2o + nad + o2 + tetpet3coa -> accoa + cipndcoa + h + h2o2 + nadh                   | 1.3.99.3 | Fatty acid oxidation, peroxisome        | (( 1962.1 and 51.2 and 30.1 ) or ( 51.1 and 30.1 and 3295.1 ) or ( 51.1 and 1962.1 and 30.1 ) or ( 51.2 and 30.1 and 3295.1 ) ) |
| FAOXC2452256x | Beta oxidation of long chain fatty acid                   | [x] : coa + h2o + nad + o2 + tetpet6coa -> accoa + dcsptn1coa + h + h2o2 + nadh                 | 1.3.99.3 | Fatty acid oxidation, peroxisome        | (( 51.1 and 30.1 and 3295.1 ) or ( 51.1 and 1962.1 and 30.1 ) or ( 1962.1 and 51.2 and 30.1 ) or ( 51.2 and 30.1 and 3295.1 ) ) |
| FAOXC246226x  | Beta oxidation of long chain fatty acid                   | [x] : coa + h2o + nad + o2 + tethex3coa -> accoa + c226coa + h + h2o2 + nadh                    | 1.3.99.3 | Fatty acid oxidation, peroxisome        | (( 51.1 and 30.1 and 3295.1 ) or ( 51.1 and 1962.1 and 30.1 ) or ( 1962.1 and 51.2 and 30.1 ) or ( 51.2 and 30.1 and 3295.1 ) ) |
| FAOXC260240x  | Beta oxidation of long chain fatty acid                   | [x] : coa + h2o + hexxcoa + nad + o2 -> accoa + h + h2o2 + lgnxcoa + nadh                       | 1.3.99.3 | Fatty acid oxidation, peroxisome        | (( 51.1 and 1962.1 and 30.1 ) or ( 1962.1 and 51.2 and 30.1 ) or ( 51.1 and 30.1 and 3295.1 ) or ( 51.2 and 30.1 and 3295.1 ) ) |
| FAOXC80       | Beta oxidation of med/long chain fatty acid               | [m] : (3) coa + (3) fad + (3) h2o + (3) nad + occoa -> (4) accoa + (3) fadh2 + (3) h + (3) nadh | 1.3.99.3 | Fatty acid oxidation                    | (35.1 or 34.1 )                                                                                                                 |
| FAS100COA     | fatty acyl-CoA synthase (n-C10:0CoA)                      | [c] : (3) h + malcoa + (2) nadph + occoa -> co2 + coa + dcacoa + h2o + (2) nadp                 | 2.3.1.86 | Fatty acid elongation                   | 2194.1                                                                                                                          |
| FAS120COA     | fatty acyl-CoA synthase (n-C12:0CoA)                      | [c] : dcacoa + (3) h + malcoa + (2) nadph -> co2 + coa + ddcaoa + h2o + (2) nadp                | 2.3.1.86 | Fatty acid elongation                   | 2194.1                                                                                                                          |
| FAS140COA     | fatty acyl-CoA synthase (n-C14:0CoA)                      | [c] : ddcaoa + (3) h + malcoa + (2) nadph -> co2 + coa + h2o + (2) nadp + tdcOA                 | 2.3.1.86 | Fatty acid elongation                   | 2194.1                                                                                                                          |
| FAS160COA     | fatty acyl-CoA synthase (n-C16:0CoA)                      | [c] : (3) h + malcoa + (2) nadph + tdcOA -> co2 + coa + h2o + (2) nadp + pmcoa                  | 2.3.1.86 | Fatty acid elongation                   | 2194.1                                                                                                                          |
| FAS180COA     | fatty acyl-CoA synthase (n-C18:0CoA)                      | [c] : (3) h + malcoa + (2) nadph + pmcoa -> co2 + coa + h2o + (2) nadp + stcoa                  | 2.3.1.86 | Fatty acid elongation                   | 2194.1                                                                                                                          |
| FAS80COA_L    | fatty acyl-CoA synthase (n-C8:0CoA), lumped reaction      | [c] : accoa + (9) h + (3) malcoa + (6) nadph -> (3) co2 + (3) coa + (3) h2o + (6) nadp + occoa  | 2.3.1.86 | Fatty acid elongation                   | 2194.1                                                                                                                          |
| FATP1t        | fatty acid electroneutral transport                       | hdca[c] + na1[c] <=> hdca[e] + na1[e]                                                           |          | Transport, Extracellular                | (10999.1 or 11000.1 or 376497.1 or 376497.2 )                                                                                   |
| FATP2t        | fatty acid electroneutral transport                       | na1[c] + ocdca[e] <=> na1[e] + ocdca[c]                                                         |          | Transport, Extracellular                | (376497.1 or 376497.2 )                                                                                                         |
| FATP3t        | fatty acid electroneutral transport                       | na1[c] + ocdca[c] <=> na1[e] + ocdca[e]                                                         |          | Transport, Extracellular                | (376497.1 or 376497.2 )                                                                                                         |
| FATP4t        | fatty acid electroneutral transport                       | arach[c] + na1[c] <=> arach[e] + na1[e]                                                         |          | Transport, Extracellular                | 10998.1                                                                                                                         |
| FATP5t        | fatty acid electroneutral transport                       | arachd[c] + na1[c] <=> arachd[e] + na1[e]                                                       |          | Transport, Extracellular                | 10998.1                                                                                                                         |
| FATP6t        | fatty acid electroneutral transport                       | adm[c] + na1[c] <=> adm[e] + na1[e]                                                             |          | Transport, Extracellular                | (10998.1 or 11001.1 )                                                                                                           |
| FATP7t        | fatty acid electroneutral transport                       | crvnc[c] + na1[c] <=> crvnc[e] + na1[e]                                                         |          | Transport, Extracellular                | (10998.1 or 11001.1 )                                                                                                           |
| FATP8t        | fatty acid electroneutral transport                       | lgnc[c] + na1[c] <=> lgnc[e] + na1[e]                                                           |          | Transport, Extracellular                | (10998.1 or 11001.1 )                                                                                                           |
| FATP9t        | fatty acid electroneutral transport                       | na1[c] + nrvc[c] <=> na1[e] + nrvc[e]                                                           |          | Transport, Extracellular                | (10998.1 or 11001.1 )                                                                                                           |
| FBA           | fructose-bisphosphate aldolase                            | [c] : fdp <=> dhap + g3p                                                                        | 4.1.2.13 | Glycolysis/Gluconeogenesis              | (226.1 or 230.1 or 226.3 or 226.2 or 229.1 )                                                                                    |
| FBA2          | D-Fructose 1-phosphate D-glyceraldehyde-3-phosphate-lyase | [c] : flp <=> dhap + glyald                                                                     | 4.1.2.13 | Fructose and Mannose Metabolism         | (226.1 or 229.1 or 226.3 or 226.2 or 230.1 )                                                                                    |
| FBA4          | D-Fructose 1-phosphate D-glyceraldehyde-3-phosphate-lyase | [c] : xu1p-D <=> dhap + gcald                                                                   | 4.1.2.13 | Glyoxylate and Dicarboxylate Metabolism | (229.1 or 230.1 or 226.3 or 226.2 or 226.1 )                                                                                    |
| FBA5          | D-Tagatose 1-phosphate D-glyceraldehyde-3-phosphate-lyase | [c] : tag1p-D <=> dhap + glyald                                                                 | 4.1.2.13 | Galactose metabolism                    | 229.1                                                                                                                           |
| FBP           | fructose-bisphosphatase                                   | [c] : fdp + h2o -> f6p + pi                                                                     | 3.1.3.11 | Glycolysis/Gluconeogenesis              | (2203.1 or 8789.1 )                                                                                                             |
| FBP26         | Fructose-2,6-bisphosphate 2-phosphatase                   | [c] : f26bp + h2o -> f6p + pi                                                                   | 3.1.3.46 | Fructose and Mannose Metabolism         | (5207.1 or 5208.1 or 5209.1 or 5210.1 or 8789.1 or 2203.1 )                                                                     |
| FCLTm         | Ferrochelatase, mitochondrial                             | [m] : fe2 + ppp9 -> (2) h + pheme                                                               | 4.99.1.1 | Heme Biosynthesis                       | (2235.1 or 2235.2 )                                                                                                             |
| FCOAH         | formyl coa hydrolase                                      | [c] : formcoa + h2o -> coa + for + (5) h                                                        |          | Fatty Acid Metabolism                   |                                                                                                                                 |
| FDH           | formate dehydrogenase                                     | [c] : for + nad -> co2 + nadh                                                                   | 1.2.1.2  | Fatty Acid Metabolism                   | 10840.1                                                                                                                         |
| FE2t          | iron (II) transport                                       | fe2[c] -> fe2[e]                                                                                |          | Transport, Extracellular                |                                                                                                                                 |
| FE2tm         | iron (II) transport                                       | fe2[c] + h[c] -> fe2[m] + h[m]                                                                  |          | Transport, Mitochondrial                |                                                                                                                                 |
| FE3R2e        | Fe(III) reduction (ascorbate)                             | [e] : ascb-L + (2) fe3 -> dhiascb + (2) fe2 + (2) h                                             |          | Heme Biosynthesis                       | 79901.1                                                                                                                         |
| FK            | Fucokinase                                                | [c] : atp + fuc-L -> adp + fuc1p-L + h                                                          | 2.7.1.52 | Fructose and Mannose Metabolism         | 197258.1                                                                                                                        |
| FKYNH         | N-Formyl-L-tryptophan amidohydrolase                      | [c] : Lfmkynr + h2o -> Lkynr + h                                                                | 3.5.1.9  | Tryptophan metabolism                   |                                                                                                                                 |
| FMNAT         | FMN adenylyltransferase                                   | [c] : atp + fmn + h -> fad + ppi                                                                | 2.7.7.2  | Riboflavin Metabolism                   | (80308.1 or 80308.2 )                                                                                                           |
| FOLR2         | folate reductase                                          | [c] : fol + nadph -> dhf + nadp                                                                 | 1.5.1.3  | Folate Metabolism                       | 1719.1                                                                                                                          |
| FOL12         | folate transport via anion exchange                       | fol[e] + oh1[c] <=> fol[c] + oh1[e]                                                             |          | Transport, Extracellular                | (6573.1 or 6573.2 )                                                                                                             |
| FORMCOAix     | formyl coa transport                                      | formcoa[x] <=> formcoa[c]                                                                       |          | Transport, Peroxisomal                  |                                                                                                                                 |
| FOR12m        | formate mitochondrial transport                           | for[m] <=> for[c]                                                                               |          | Transport, Mitochondrial                |                                                                                                                                 |
| FORtr         | FOR transporter, endoplasmic reticulum                    | for[c] <=> for[r]                                                                               |          | Transport, Endoplasmic Reticular        |                                                                                                                                 |
| FORtm         | Formate transport, nuclear                                | for[c] <=> for[n]                                                                               |          | Transport, Nuclear                      |                                                                                                                                 |
| FPGS          | folypolyglutamate synthetase                              | [c] : (4) atp + (4) glu-L + thf -> 5thf + (4) adp + (4) h + (4) pi                              | 6.3.2.17 | Folate Metabolism                       | 2356.1                                                                                                                          |
| FPGS2         | folypolyglutamate synthetase                              | [c] : 5thf + atp + glu-L -> 6thf + adp + h + pi                                                 | 6.3.2.17 | Folate Metabolism                       | 2356.1                                                                                                                          |

| Abbreviation                                         | Reaction Name                                                               | Reaction                                                                                                    | E.C. #   | Pathway                     | Gene association                                       |
|------------------------------------------------------|-----------------------------------------------------------------------------|-------------------------------------------------------------------------------------------------------------|----------|-----------------------------|--------------------------------------------------------|
| FPGS2m                                               | folypolyglutamate synthetase, mitochondrial                                 | [m] : 5hf + atp + glu-L --> 6thf + adp + h + pi                                                             | 6.3.2.17 | Folate Metabolism           | 2356.1                                                 |
| FPGS3                                                | folypolyglutamate synthetase                                                | [c] : 6thf + atp + glu-L --> 7thf + adp + h + pi                                                            | 6.3.2.17 | Folate Metabolism           | 2356.1                                                 |
| FPGS3m                                               | folypolyglutamate synthetase, mitochondrial                                 | [m] : 6thf + atp + glu-L --> 7thf + adp + h + pi                                                            | 6.3.2.17 | Folate Metabolism           | 2356.1                                                 |
| FPGS4                                                | folypolyglutamate synthetase (DHF)                                          | [c] : (4) atp + dhf + (4) glu-L --> 5dhf + (4) adp + (4) h + (4) pi                                         | 6.3.2.17 | Folate Metabolism           | 2356.1                                                 |
| FPGS4m                                               | folypolyglutamate synthetase (DHF), mitochondrial                           | [m] : (4) atp + dhf + (4) glu-L --> 5dhf + (4) adp + (4) h + (4) pi                                         | 6.3.2.17 | Folate Metabolism           | 2356.1                                                 |
| FPGS5                                                | folypolyglutamate synthetase (DHF)                                          | [c] : 5dhf + atp + glu-L --> 6dhf + adp + h + pi                                                            | 6.3.2.17 | Folate Metabolism           | 2356.1                                                 |
| FPGS5m                                               | folypolyglutamate synthetase (DHF), mitochondrial                           | [m] : 5dhf + atp + glu-L --> 6dhf + adp + h + pi                                                            | 6.3.2.17 | Folate Metabolism           | 2356.1                                                 |
| FPGS6                                                | folypolyglutamate synthetase (DHF)                                          | [c] : 6dhf + atp + glu-L --> 7dhf + adp + h + pi                                                            | 6.3.2.17 | Folate Metabolism           | 2356.1                                                 |
| FPGS6m                                               | folypolyglutamate synthetase (DHF), mitochondrial                           | [m] : 6dhf + atp + glu-L --> 7dhf + adp + h + pi                                                            | 6.3.2.17 | Folate Metabolism           | 2356.1                                                 |
| FPGS7                                                | folypolyglutamate synthetase (10thf)                                        | [c] : 10thf + (4) atp + (4) glu-L --> 10thf5glu + (4) adp + (4) h + (4) pi                                  | 6.3.2.17 | Folate Metabolism           | 2356.1                                                 |
| FPGS7m                                               | folypolyglutamate synthetase (10thf), mitochondrial                         | [m] : 10thf + (4) atp + (4) glu-L --> 10thf5glu + (4) adp + (4) h + (4) pi                                  | 6.3.2.17 | Folate Metabolism           | 2356.1                                                 |
| FPGS8                                                | folypolyglutamate synthetase (10thf)                                        | [c] : 10thf5glu + atp + glu-L --> 10thf6glu + adp + h + pi                                                  | 6.3.2.17 | Folate Metabolism           | 2356.1                                                 |
| FPGS8m                                               | folypolyglutamate synthetase (10thf), mitochondrial                         | [m] : 10thf5glu + atp + glu-L --> 10thf6glu + adp + h + pi                                                  | 6.3.2.17 | Folate Metabolism           | 2356.1                                                 |
| FPGS9                                                | folypolyglutamate synthetase (10thf)                                        | [c] : 10thf6glu + atp + glu-L --> 10thf7glu + adp + h + pi                                                  | 6.3.2.17 | Folate Metabolism           | 2356.1                                                 |
| FPGS9m                                               | folypolyglutamate synthetase (10thf), mitochondrial                         | [m] : 10thf6glu + atp + glu-L --> 10thf7glu + adp + h + pi                                                  | 6.3.2.17 | Folate Metabolism           | 2356.1                                                 |
| FPGSm                                                | folypolyglutamate synthetase, mitochondrial                                 | [m] : (4) atp + (4) glu-L + thf --> 5thf + (4) adp + (4) h + (4) pi                                         | 6.3.2.17 | Folate Metabolism           | 2356.1                                                 |
| FRDPic                                               | lipid, flip-flop intracellular transport                                    | frdp[x] <=> frdp[c]                                                                                         |          | Transport, Peroxisomal      |                                                        |
| FRDPir                                               | lipid, flip-flop intracellular transport                                    | frdp[x] <=> frdp[r]                                                                                         |          | Transport, Peroxisomal      |                                                        |
| FRTT                                                 | farnesyltransferase                                                         | [c] : frdp + ipdp --> ggdp + ppi                                                                            | 2.5.1.29 | Cholesterol Metabolism      | 9453.1                                                 |
| FRU1r                                                | D-fructose transport in via uniport                                         | fru[e] <=> fru[c]                                                                                           |          | Transport, Extracellular    | ( 6514.1 or 6518.1 or 155184.1 or 29988.1 or 66035.1 ) |
| FRU4                                                 | D-fructose transport via sodium cotransport                                 | fru[e] + na1[e] <=> fru[c] + na1[c]                                                                         |          | Transport, Extracellular    | 200010.1                                               |
| FT                                                   | farnesyltransferase (trans,trans,cis-geranylgeranyl diphosphate-generating) | [c] : frdp + ipdp --> ppi + tc-ggdp                                                                         |          | N-Glycan Biosynthesis       |                                                        |
| FTCD                                                 | formimidoyltransferase cyclodeaminase                                       | [c] : 5forthf + (2) h --> methf + nb4                                                                       | 4.3.1.4  | Folate Metabolism           | ( 10841.1 or 10841.2 )                                 |
| FTHFCL                                               | 5-formethyltetrahydrofolate cyclo-ligase                                    | [c] : 5thf + atp --> adp + methf + pi                                                                       | 6.3.3.2  | Folate Metabolism           | 10588.1                                                |
| FTHFDH                                               | formyltetrahydrofolate dehydrogenase                                        | [c] : 10thf + h2o + nadp --> co2 + h + nadph + thf                                                          | 1.5.1.6  | Folate Metabolism           | 10840.1                                                |
| FTHFL                                                | formate-tetrahydrofolate ligase                                             | [c] : atp + for + thf <=> 10thf + adp + pi                                                                  | 6.3.4.3  | Folate Metabolism           | ( 4522.1 or 286297.1 )                                 |
| FTHFLm                                               | formate-tetrahydrofolate ligase, mitochondrial                              | [m] : atp + for + thf <=> 10thf + adp + pi                                                                  | 6.3.4.3  | Folate Metabolism           | 25902.1                                                |
| FUC13GALACGLCGAL14ACGLCGALGLUSIDEIe                  | blood group intracellular transport                                         | fuc13galaclegal14aclegalgalside_hs[e] <=> fuc13galaclegal14aclegalgalside_hs[c]                             |          | Transport, Extracellular    |                                                        |
| FUC13GALACGLCGAL14ACGLCGALGLUSIDEIe                  | blood group intracellular transport                                         | fuc13galaclegal14aclegalgalside_hs[g] <=> fuc13galaclegal14aclegalgalside_hs[c]                             |          | Transport, Golgi Apparatus  |                                                        |
| FUC14GALACGLCGALGLUSIDEIe                            | blood group intracellular transport                                         | fuc14galaclegalgalside_hs[e] <=> fuc14galaclegalgalside_hs[c]                                               |          | Transport, Extracellular    |                                                        |
| FUC14GALACGLCGALGLUSIDEIe                            | blood group intracellular transport                                         | fuc14galaclegalgalside_hs[g] <=> fuc14galaclegalgalside_hs[c]                                               |          | Transport, Golgi Apparatus  |                                                        |
| FUCACGALFUCGALACGLCGALGLUSIDEIe                      | blood group intracellular transport                                         | fucacgalfucgalaclegalgalside_hs[e] <=> fucacgalfucgalaclegalgalside_hs[c]                                   |          | Transport, Extracellular    |                                                        |
| FUCACGALFUCGALACGLCGALGLUSIDEIe                      | blood group intracellular transport                                         | fucacgalfucgalaclegalgalside_hs[g] <=> fucacgalfucgalaclegalgalside_hs[c]                                   |          | Transport, Golgi Apparatus  |                                                        |
| FUCACNGAL14ACGLCGALGLUSIDEIe                         | blood group intracellular transport                                         | fucacngal14aclegalgalside_hs[e] <=> fucacngal14aclegalgalside_hs[c]                                         |          | Transport, Extracellular    |                                                        |
| FUCACNGAL14ACGLCGALGLUSIDEIe                         | blood group intracellular transport                                         | fucacngal14aclegalgalside_hs[g] <=> fucacngal14aclegalgalside_hs[c]                                         |          | Transport, Golgi Apparatus  |                                                        |
| FUCACNGALACGLCGALGLUSIDEIe                           | blood group intracellular transport                                         | fucacngalaclegalgalside_hs[e] <=> fucacngalaclegalgalside_hs[c]                                             |          | Transport, Extracellular    |                                                        |
| FUCACNGALACGLCGALGLUSIDEIe                           | blood group intracellular transport                                         | fucacngalaclegalgalside_hs[g] <=> fucacngalaclegalgalside_hs[c]                                             |          | Transport, Golgi Apparatus  |                                                        |
| FUCASE2e                                             | alpha-fucosidase, extracellular                                             | [e] : h2o + ksi --> fuc-L + ksi_deg1                                                                        | 3.2.1.51 | Keratan sulfate degradation | 2519.1                                                 |
| FUCASE2ly                                            | alpha-fucosidase, lysosomal                                                 | [l] : h2o + ksi --> fuc-L + ksi_deg1                                                                        | 3.2.1.51 | Keratan sulfate degradation | 2517.1                                                 |
| FUCASEe                                              | alpha-fucosidase, extracellular                                             | [e] : h2o + s2l2m2m2masn --> fuc-L + s2l2m2m2masn                                                           | 3.2.1.51 | N-Glycan Degradation        | 2519.1                                                 |
| FUCASEly                                             | alpha-fucosidase, lysosomal                                                 | [l] : h2o + s2l2m2m2masn --> fuc-L + s2l2m2m2masn                                                           | 3.2.1.51 | N-Glycan Degradation        | 2517.1                                                 |
| FUCFUC12GAL14ACGLCGALGLUSIDEIe                       | blood group intracellular transport                                         | fucfuc12gal14aclegalgalside_hs[e] <=> fucfuc12gal14aclegalgalside_hs[c]                                     |          | Transport, Extracellular    |                                                        |
| FUCFUC12GAL14ACGLCGALGLUSIDEIe                       | blood group intracellular transport                                         | fucfuc12gal14aclegalgalside_hs[g] <=> fucfuc12gal14aclegalgalside_hs[c]                                     |          | Transport, Golgi Apparatus  |                                                        |
| FUCFUC132GALACGLCGAL14ACGLCGALGLUSIDEIe              | blood group intracellular transport                                         | fucfuc132galaclegal14aclegalgalside_hs[e] <=> fucfuc132galaclegal14aclegalgalside_hs[c]                     |          | Transport, Extracellular    |                                                        |
| FUCFUC132GALACGLCGAL14ACGLCGALGLUSIDEIe              | blood group intracellular transport                                         | fucfuc132galaclegal14aclegalgalside_hs[g] <=> fucfuc132galaclegal14aclegalgalside_hs[c]                     |          | Transport, Golgi Apparatus  |                                                        |
| FUCFUCFUCGALACGLCGAL13GALACGLCGAL14ACGLCGALGLUSIDEIe | blood group intracellular transport                                         | fucfucfucgalacglc13galaclegal14aclegalgalside_hs[e] <=> fucfucfucgalacglc13galaclegal14aclegalgalside_hs[c] |          | Transport, Extracellular    |                                                        |
| FUCFUCFUCGALACGLCGAL13GALACGLCGAL14ACGLCGALGLUSIDEIe | blood group intracellular transport                                         | fucfucfucgalacglc13galaclegal14aclegalgalside_hs[g] <=> fucfucfucgalacglc13galaclegal14aclegalgalside_hs[c] |          | Transport, Golgi Apparatus  |                                                        |
| FUCFUCFUCGALACGLCGAL14ACGLCGALGLUSIDEIe              | blood group intracellular transport                                         | fucfucfucgalaclegal14aclegalgalside_hs[e] <=> fucfucfucgalaclegal14aclegalgalside_hs[c]                     |          | Transport, Extracellular    |                                                        |
| FUCFUCFUCGALACGLCGAL14ACGLCGALGLUSIDEIe              | blood group intracellular transport                                         | fucfucfucgalaclegal14aclegalgalside_hs[g] <=> fucfucfucgalaclegal14aclegalgalside_hs[c]                     |          | Transport, Golgi Apparatus  |                                                        |
| FUCFUCGALACGLCGALGLUSIDEIe                           | blood group intracellular transport                                         | fucfucgalaclegalgalside_hs[e] <=> fucfucgalaclegalgalside_hs[c]                                             |          | Transport, Extracellular    |                                                        |

| Abbreviation                  | Reaction Name                                                                              | Reaction                                                                                                                    | E.C. #    | Pathway                      | Gene association                                   |
|-------------------------------|--------------------------------------------------------------------------------------------|-----------------------------------------------------------------------------------------------------------------------------|-----------|------------------------------|----------------------------------------------------|
| FUCFUCGALACGLCGALGLUSIDeEg    | blood group intracellular transport                                                        | fucfucgalaclegalgluside_hs[g] <=>> fucfucgalaclegalgluside_hs[e]                                                            |           | Transport, Golgi Apparatus   |                                                    |
| FUCGAL14ACGLCGALGLUSIDeE      | blood group intracellular transport                                                        | fucgal14aclegalgluside_hs[e] <=>> fucgal14aclegalgluside_hs[c]                                                              |           | Transport, Extracellular     |                                                    |
| FUCGAL14ACGLCGALGLUSIDeEg     | blood group intracellular transport                                                        | fucgal14aclegalgluside_hs[g] <=>> fucgal14aclegalgluside_hs[c]                                                              |           | Transport, Golgi Apparatus   |                                                    |
| FUCGALFUCGALACGLCGALGLUSIDeE  | blood group intracellular transport                                                        | fucgalfucgalaclegalgluside_hs[e] <=>> fucgalfucgalaclegalgluside_hs[c]                                                      |           | Transport, Extracellular     |                                                    |
| FUCGALFUCGALACGLCGALGLUSIDeEg | blood group intracellular transport                                                        | fucgalfucgalaclegalgluside_hs[g] <=>> fucgalfucgalaclegalgluside_hs[c]                                                      |           | Transport, Golgi Apparatus   |                                                    |
| FUCGALGBSIDeE                 | fucalgsbide_hs transport                                                                   | fucalgsbide_hs[c] <=>> fucalgsbide_hs[e]                                                                                    |           | Transport, Extracellular     |                                                    |
| FUCGALGBSIDeEg                | fucalgsbide_hs intracellular transport                                                     | fucalgsbide_hs[c] <=>> fucalgsbide_hs[g]                                                                                    |           | Transport, Golgi Apparatus   |                                                    |
| FUCily                        | L-fucose efflux from lysosome                                                              | fuc-L[i] --> fuc-L[c]                                                                                                       |           | Transport, Lysosomal         |                                                    |
| FUM                           | fumarase                                                                                   | [c] : fum + h2o <=>> mal-L                                                                                                  | 4.2.1.2   | Citric Acid Cycle            | 2271.1                                             |
| FUMAC                         | fumarylacetoacetase                                                                        | [c] : 4fumacac + h2o --> acac + fum + h                                                                                     | 3.7.1.2   | Tyrosine metabolism          | 2184.1                                             |
| FUMm                          | fumarase, mitochondrial                                                                    | [m] : fum + h2o <=>> mal-L                                                                                                  | 4.2.1.2   | Citric Acid Cycle            | 2271.1                                             |
| FUMSO3tm                      | Fumarate:sulfite antiport, mitochondrial                                                   | fum[c] + so3[m] <=>> fum[m] + so3[c]                                                                                        |           | Transport, Mitochondrial     | 1468.1                                             |
| FUMSO4tm                      | Fumarate:sulfate antiport, mitochondrial                                                   | fum[c] + so4[m] <=>> fum[m] + so4[c]                                                                                        |           | Transport, Mitochondrial     | 1468.1                                             |
| FUMtm                         | fumarate transport, mitochondrial                                                          | fum[c] + pi[m] <=>> fum[m] + pi[c]                                                                                          |           | Transport, Mitochondrial     | 1468.1                                             |
| FUMTSLm                       | Fumarate:thiosulfate antiport, mitochondrial                                               | fum[c] + tsul[m] <=>> fum[m] + tsul[c]                                                                                      |           | Transport, Mitochondrial     | 1468.1                                             |
| FUT11g                        | Galactoside 2-alpha-L-fucosyltransferase 1                                                 | [g] : galgsbide_hs + gdpfuc --> fucgalgsbide_hs + gdp + h                                                                   | 2.4.1.69  | Sphingolipid Metabolism      | 2523.1                                             |
| FUT12g                        | Galactoside 2-alpha-L-fucosyltransferase 1                                                 | [g] : galaclegalgluside_hs + gdpfuc --> fucgalaclegalgluside_hs + gdp + h                                                   | 2.4.1.69  | Blood Group Biosynthesis     | 2523.1                                             |
| FUT14g                        | Galactoside 2-alpha-L-fucosyltransferase 1                                                 | [g] : gal14aclegalgluside_hs + gdpfuc --> fuc12gal14aclegalgluside_hs + gdp + h                                             | 2.4.1.69  | Blood Group Biosynthesis     | 2523.1                                             |
| FUT15g                        | Galactoside 2-alpha-L-fucosyltransferase 1                                                 | [g] : galacgalfuc12gal14aclegalgluside_hs + gdpfuc --> fucgalacgalfuc12gal14aclegalgluside_hs + gdp + h                     | 2.4.1.69  | Blood Group Biosynthesis     | 2523.1                                             |
| FUT16g                        | Galactoside 2-alpha-L-fucosyltransferase 1                                                 | [g] : galaclegal14aclegalgluside_hs + gdpfuc --> fucgalaclegal14aclegalgluside_hs + gdp + h                                 | 2.4.1.69  | Blood Group Biosynthesis     | 2523.1                                             |
| FUT17g                        | Galactoside 2-alpha-L-fucosyltransferase 1                                                 | [g] : galacgalfucgalaclegal14aclegalgluside_hs + gdpfuc --> fucgalacgalfucgalaclegal14aclegalgluside_hs + gdp + h           | 2.4.1.69  | Blood Group Biosynthesis     | 2523.1                                             |
| FUT18g                        | Galactoside 2-alpha-L-fucosyltransferase 1                                                 | [g] : galaclegalaclegal14aclegalgluside_hs + (2) gdpfuc --> fucfucgalaclegalaclegal14aclegalgluside_hs + (2) gdp + (2) h    | 2.4.1.69  | Blood Group Biosynthesis     | 2523.1                                             |
| FUT31g                        | fucosyltransferase 3 (galactoside 3(4)-L-fucosyltransferase, Lewis blood group included) 1 | [g] : galclegalgluside_hs + gdpfuc --> fuc14galclegalgluside_hs + gdp + h                                                   | 2.4.1.65  | Blood Group Biosynthesis     | 2525.1                                             |
| FUT32g                        | fucosyltransferase 3 (galactoside 3(4)-L-fucosyltransferase, Lewis blood group included) 1 | [g] : acngalaclegalgluside_hs + gdpfuc --> fucacngalaclegalgluside_hs + gdp + h                                             | 2.4.1.65  | Blood Group Biosynthesis     | 2525.1                                             |
| FUT33g                        | fucosyltransferase 3 (galactoside 3(4)-L-fucosyltransferase, Lewis blood group included) 1 | [g] : acgalfucgalclegalgluside_hs + gdpfuc --> fucacgalfucgalclegalgluside_hs + gdp + h                                     | 2.4.1.65  | Blood Group Biosynthesis     | 2525.1                                             |
| FUT34g                        | fucosyltransferase 3 (galactoside 3(4)-L-fucosyltransferase, Lewis blood group included) 1 | [g] : fucgalclegalgluside_hs + gdpfuc --> fucfucgalclegalgluside_hs + gdp + h                                               | 2.4.1.65  | Blood Group Biosynthesis     | 2525.1                                             |
| FUT35g                        | fucosyltransferase 3 (galactoside 3(4)-L-fucosyltransferase, Lewis blood group included) 1 | [g] : galfucgalclegalgluside_hs + gdpfuc --> fucgalfucgalclegalgluside_hs + gdp + h                                         | 2.4.1.65  | Blood Group Biosynthesis     | 2525.1                                             |
| FUT910g                       | Alpha-(1,3)-fucosyltransferase                                                             | [g] : fucgalacleg13galaclegal14aclegalgluside_hs + gdpfuc --> fucfucgalacleg13galaclegal14aclegalgluside_hs + gdp + h       | 2.4.1.152 | Blood Group Biosynthesis     | 10690.1                                            |
| FUT911g                       | Alpha-(1,3)-fucosyltransferase                                                             | [g] : fucfucgalacleg13galaclegal14aclegalgluside_hs + gdpfuc --> fucfucfucgalacleg13galaclegal14aclegalgluside_hs + gdp + h | 2.4.1.152 | Blood Group Biosynthesis     | 10690.1                                            |
| FUT91g                        | Alpha-(1,3)-fucosyltransferase                                                             | [g] : gal14aclegalgluside_hs + gdpfuc --> fucgal14aclegalgluside_hs + gdp + h                                               | 2.4.1.152 | Blood Group Biosynthesis     | 10690.1                                            |
| FUT92g                        | Alpha-(1,3)-fucosyltransferase                                                             | [g] : acngal14aclegalgluside_hs + gdpfuc --> fucacngal14aclegalgluside_hs + gdp + h                                         | 2.4.1.152 | Blood Group Biosynthesis     | 10690.1                                            |
| FUT93g                        | Alpha-(1,3)-fucosyltransferase                                                             | [g] : fuc12gal14aclegalgluside_hs + gdpfuc --> fucfuc12gal14aclegalgluside_hs + gdp + h                                     | 2.4.1.152 | Blood Group Biosynthesis     | 10690.1                                            |
| FUT94g                        | Alpha-(1,3)-fucosyltransferase                                                             | [g] : fucgalaclegal14aclegalgluside_hs + gdpfuc --> fucfucgalaclegal14aclegalgluside_hs + gdp + h                           | 2.4.1.152 | Blood Group Biosynthesis     | 10690.1                                            |
| FUT95g                        | Alpha-(1,3)-fucosyltransferase                                                             | [g] : fucfucgalaclegal14aclegalgluside_hs + gdpfuc --> fucfucfucgalaclegal14aclegalgluside_hs + gdp + h                     | 2.4.1.152 | Blood Group Biosynthesis     | 10690.1                                            |
| FUT96g                        | Alpha-(1,3)-fucosyltransferase                                                             | [g] : galaclegal14aclegalgluside_hs + gdpfuc --> fuc132galaclegal14aclegalgluside_hs + gdp + h                              | 2.4.1.152 | Blood Group Biosynthesis     | 10690.1                                            |
| FUT97g                        | Alpha-(1,3)-fucosyltransferase                                                             | [g] : fuc132galaclegal14aclegalgluside_hs + gdpfuc --> fucfuc132galaclegal14aclegalgluside_hs + gdp + h                     | 2.4.1.152 | Blood Group Biosynthesis     | 10690.1                                            |
| FUT98g                        | Alpha-(1,3)-fucosyltransferase                                                             | [g] : galaclegal14aclegalgluside_hs + gdpfuc --> fuc13galaclegal14aclegalgluside_hs + gdp + h                               | 2.4.1.152 | Blood Group Biosynthesis     | 10690.1                                            |
| FUT99g                        | Alpha-(1,3)-fucosyltransferase                                                             | [g] : galacleg13galaclegal14aclegalgluside_hs + gdpfuc --> fucgalacleg13galaclegal14aclegalgluside_hs + gdp + h             | 2.4.1.152 | Blood Group Biosynthesis     | 10690.1                                            |
| G12MT1_L                      | Glycolipid 1,2-alpha-D-mannosyltransferase (liver)                                         | [c] : gdpmann + (0.1) m2mpdoL --> gdp + h + (0.1) m3mpdoL                                                                   | 2.4.1.131 | N-Glycan Biosynthesis        |                                                    |
| G12MT1_U                      | Glycolipid 1,2-alpha-D-mannosyltransferase (uterus)                                        | [c] : gdpmann + (0.1) m2mpdoL --> gdp + h + (0.1) m3mpdoL                                                                   | 2.4.1.131 | N-Glycan Biosynthesis        |                                                    |
| G12MT2_L                      | Glycolipid 1,2-alpha-D-mannosyltransferase (liver)                                         | [c] : gdpmann + (0.1) m3mpdoL --> gdp + h + (0.1) m4mpdoL                                                                   | 2.4.1.131 | N-Glycan Biosynthesis        |                                                    |
| G12MT2_U                      | Glycolipid 1,2-alpha-D-mannosyltransferase (uterus)                                        | [c] : gdpmann + (0.1) m3mpdoL --> gdp + h + (0.1) m4mpdoL                                                                   | 2.4.1.131 | N-Glycan Biosynthesis        |                                                    |
| G13MT_L                       | Glycolipid 1,3-alpha-D-mannosyltransferase (liver)                                         | [c] : gdpmann + (0.1) mpdoL --> gdp + h + (0.1) m1mpdoL                                                                     | 2.4.1.132 | N-Glycan Biosynthesis        | ( 85365.1 or 85365.2 )                             |
| G13MT_U                       | Glycolipid 1,3-alpha-D-mannosyltransferase (uterus)                                        | [c] : gdpmann + (0.1) mpdoL --> gdp + h + (0.1) m1mpdoL                                                                     | 2.4.1.132 | N-Glycan Biosynthesis        | ( 85365.2 or 85365.1 )                             |
| G14T10g                       | beta-N-acetylglucosaminylglycopeptide beta-1,4-galactosyltransferase, Golgi                | [g] : ksi_pre14 + udpgal --> h + ksi_pre15 + udp                                                                            | 2.4.1.38  | Keratan sulfate biosynthesis | ( 2683.1 or 8704.2 or 8703.1 or 9334.1 or 8704.1 ) |
| G14T11g                       | beta-N-acetylglucosaminylglycopeptide beta-1,4-galactosyltransferase, Golgi                | [g] : ksi_pre17 + udpgal --> h + ksi_pre18 + udp                                                                            | 2.4.1.38  | Keratan sulfate biosynthesis | ( 8704.2 or 2683.1 or 8704.1 or 8703.1 or 9334.1 ) |
| G14T12g                       | beta-N-acetylglucosaminylglycopeptide beta-1,4-galactosyltransferase, Golgi                | [g] : ksi_pre20 + udpgal --> h + ksi_pre21 + udp                                                                            | 2.4.1.38  | Keratan sulfate biosynthesis | ( 2683.1 or 8704.1 or 8704.2 or 8703.1 or 9334.1 ) |
| G14T13g                       | beta-N-acetylglucosaminylglycopeptide beta-1,4-galactosyltransferase, Golgi                | [g] : ksi_pre23 + udpgal --> h + ksi_pre24 + udp                                                                            | 2.4.1.38  | Keratan sulfate biosynthesis | ( 2683.1 or 8704.1 or 8704.2 or 8703.1 or 9334.1 ) |

| Abbreviation       | Reaction Name                                                               | Reaction                                                                | E.C. #   | Pathway                           | Gene association                                   |
|--------------------|-----------------------------------------------------------------------------|-------------------------------------------------------------------------|----------|-----------------------------------|----------------------------------------------------|
| G14T14g            | beta-N-acetylglucosaminylglycopeptide beta-1,4-galactosyltransferase, Golgi | [g] : ksi_pre26 + udpgal --> h + ksi_pre27 + udp                        | 2.4.1.38 | Keratan sulfate biosynthesis      | ( 8704.2 or 2683.1 or 8704.1 or 8703.1 or 9334.1 ) |
| G14T15g            | beta-N-acetylglucosaminylglycopeptide beta-1,4-galactosyltransferase, Golgi | [g] : ksi_pre29 + udpgal --> h + ksi_pre30 + udp                        | 2.4.1.38 | Keratan sulfate biosynthesis      | ( 2683.1 or 8704.1 or 8704.2 or 8703.1 or 9334.1 ) |
| G14T16g            | beta-N-acetylglucosaminylglycopeptide beta-1,4-galactosyltransferase, Golgi | [g] : ksi_pre32 + udpgal --> h + ksi_pre33 + udp                        | 2.4.1.38 | Keratan sulfate biosynthesis      | ( 8704.1 or 8704.2 or 8703.1 or 8703.1 or 2683.1 ) |
| G14T17g            | beta-N-acetylglucosaminylglycopeptide beta-1,4-galactosyltransferase, Golgi | [g] : ksi_pre35 + udpgal --> h + ksi_pre36 + udp                        | 2.4.1.38 | Keratan sulfate biosynthesis      | ( 8704.2 or 2683.1 or 8704.1 or 8703.1 or 9334.1 ) |
| G14T18g            | beta-N-acetylglucosaminylglycopeptide beta-1,4-galactosyltransferase, Golgi | [g] : core4 + (2) udpgal --> (2) h + ksii_core4_pre1 + (2) udp          | 2.4.1.38 | Keratan sulfate biosynthesis      | ( 8704.2 or 2683.1 or 8704.1 or 8703.1 or 9334.1 ) |
| G14T19g            | beta-N-acetylglucosaminylglycopeptide beta-1,4-galactosyltransferase, Golgi | [g] : ksii_core4_pre3 + udpgal --> h + ksii_core4_pre4 + udp            | 2.4.1.38 | Keratan sulfate biosynthesis      | ( 2683.1 or 8704.1 or 8704.2 or 8703.1 or 9334.1 ) |
| G14T20g            | beta-N-acetylglucosaminylglycopeptide beta-1,4-galactosyltransferase, Golgi | [g] : ksii_core4_pre6 + udpgal --> h + ksii_core4_pre7 + udp            | 2.4.1.38 | Keratan sulfate biosynthesis      | ( 2683.1 or 8704.1 or 8704.2 or 8703.1 or 9334.1 ) |
| G14T21g            | beta-N-acetylglucosaminylglycopeptide beta-1,4-galactosyltransferase, Golgi | [g] : ksii_core4_pre9 + udpgal --> h + ksii_core4_pre10 + udp           | 2.4.1.38 | Keratan sulfate biosynthesis      | ( 2683.1 or 8704.1 or 8704.2 or 8703.1 or 9334.1 ) |
| G14T22g            | beta-N-acetylglucosaminylglycopeptide beta-1,4-galactosyltransferase, Golgi | [g] : ksii_core2_pre1 + udpgal --> h + ksii_core2_pre2 + udp            | 2.4.1.38 | Keratan sulfate biosynthesis      | ( 2683.1 or 8704.1 or 8704.2 or 8703.1 or 9334.1 ) |
| G14T23g            | beta-N-acetylglucosaminylglycopeptide beta-1,4-galactosyltransferase, Golgi | [g] : ksii_core2_pre3 + udpgal --> h + ksii_core2_pre4 + udp            | 2.4.1.38 | Keratan sulfate biosynthesis      | ( 2683.1 or 8704.1 or 8704.2 or 8703.1 or 9334.1 ) |
| G14T24g            | beta-N-acetylglucosaminylglycopeptide beta-1,4-galactosyltransferase, Golgi | [g] : ksii_core2_pre6 + udpgal --> h + ksii_core2_pre7 + udp            | 2.4.1.38 | Keratan sulfate biosynthesis      | ( 2683.1 or 8704.1 or 8704.2 or 8703.1 or 9334.1 ) |
| G14T25g            | beta-N-acetylglucosaminylglycopeptide beta-1,4-galactosyltransferase, Golgi | [g] : ksii_core2_pre9 + udpgal --> h + ksii_core2_pre10 + udp           | 2.4.1.38 | Keratan sulfate biosynthesis      | ( 2683.1 or 8704.1 or 8704.2 or 9334.1 or 8703.1 ) |
| G14T26g            | beta-N-acetylglucosaminylglycopeptide beta-1,4-galactosyltransferase, Golgi | [g] : ksi_pre2 + udpgal --> h + ksi_pre3 + udp                          | 2.4.1.38 | Keratan sulfate biosynthesis      | ( 2683.1 or 8704.1 or 8704.2 or 8703.1 or 9334.1 ) |
| G14T27g            | beta-N-acetylglucosaminylglycopeptide beta-1,4-galactosyltransferase, Golgi | [g] : ksi_pre5 + udpgal --> h + ksi_pre6 + udp                          | 2.4.1.38 | Keratan sulfate biosynthesis      | ( 2683.1 or 8704.1 or 8704.2 or 8703.1 or 9334.1 ) |
| G14T28g            | beta-N-acetylglucosaminylglycopeptide beta-1,4-galactosyltransferase, Golgi | [g] : ksi_pre8 + udpgal --> h + ksi_pre9 + udp                          | 2.4.1.38 | Keratan sulfate biosynthesis      | ( 2683.1 or 8704.1 or 8704.2 or 8703.1 or 9334.1 ) |
| G14T29g            | beta-N-acetylglucosaminylglycopeptide beta-1,4-galactosyltransferase, Golgi | [g] : ksi_pre11 + udpgal --> h + ksi_pre12 + udp                        | 2.4.1.38 | Keratan sulfate biosynthesis      | ( 2683.1 or 8704.1 or 8704.2 or 8703.1 or 9334.1 ) |
| G14Tg              | beta-N-acetylglucosaminylglycopeptide beta-1,4-galactosyltransferase        | [g] : fn2m2masn + (2) udpgal --> (2) h + 12fn2m2masn + (2) udp          | 2.4.1.38 | N-Glycan Biosynthesis             | ( 2683.1 or 8703.1 or 8704.1 or 9334.1 or 8704.2 ) |
| G16MT_L            | Glycolipid 1,6-alpha-D-mannosyltransferase (liver)                          | [c] : gdpmann + (0.1) m1mpdol_L --> gdp + h + (0.1) m2mpdol_L           |          | N-Glycan Biosynthesis             |                                                    |
| G16MT_U            | Glycolipid 1,6-alpha-D-mannosyltransferase (uterus)                         | [c] : gdpmann + (0.1) m1mpdol_U --> gdp + h + (0.1) m2mpdol_U           |          | N-Glycan Biosynthesis             |                                                    |
| G1M6MASNB1terg     | g1m6masnB1 endoplasmic reticulum to Golgi transport                         | g1m6masnB1[r] --> g1m6masnB1[g]                                         |          | N-Glycan Biosynthesis             |                                                    |
| G1M7MASNBterg      | g1m7masnB endoplasmic reticulum to Golgi transport                          | g1m7masnB[r] --> g1m7masnB[g]                                           |          | N-Glycan Biosynthesis             |                                                    |
| G1M7MASNCterg      | g1m7masnC endoplasmic reticulum to Golgi transport                          | g1m7masnC[r] --> g1m7masnC[g]                                           |          | N-Glycan Biosynthesis             |                                                    |
| G1M8MASNterg       | g1m8masn transport from endoplasmic reticulum to Golgi apparatus            | g1m8masn[r] --> g1m8masn[g]                                             |          | N-Glycan Biosynthesis             |                                                    |
| G1PPT              | glucose-1-phosphate thymidyltransferase                                     | [c] : dntp + g1p + h --> dtdp + ppi                                     | 2.7.7.24 | Nucleotide Sugar Metabolism       |                                                    |
| G2M8MASNterg       | g2m8masn transport from endoplasmic reticulum to Golgi apparatus            | g2m8masn[r] --> g2m8masn[g]                                             |          | N-Glycan Biosynthesis             |                                                    |
| G3M8MASNterg       | g3m8masn transport from endoplasmic reticulum to Golgi apparatus            | g3m8masn[r] --> g3m8masn[g]                                             |          | N-Glycan Biosynthesis             |                                                    |
| G3PD1              | glycerol-3-phosphate dehydrogenase (NAD)                                    | [c] : gly3p + nad <=> dhap + h + nadh                                   | 1.1.1.94 | Glycerophospholipid Metabolism    | 2819.1                                             |
| G3PD2m             | glycerol-3-phosphate dehydrogenase (FAD), mitochondrial                     | [c] : gly3p + fad[m] --> dhap[c] + fadh2[m]                             | 1.1.99.5 | Glycolysis/Gluconeogenesis        | 2820.1                                             |
| G5SADrm            | L-glutamate 5-semialdehyde dehydratase, reversible, mitochondrial           | [m] : glu5sa <=> 1pyr5c + h + h2o                                       |          | Arginine and Proline Metabolism   |                                                    |
| G5SADs             | L-glutamate 5-semialdehyde dehydratase (spontaneous)                        | [c] : glu5sa --> 1pyr5c + h + h2o                                       |          | Urea cycle/amino group metabolism |                                                    |
| G5SDym             | glutamate-5-semialdehyde dehydrogenase (m)                                  | [m] : glu5p + h + nadph --> glu5sa + nadp + pi                          | 1.2.1.41 | Urea cycle/amino group metabolism | 5832.1                                             |
| G6PDA              | glucosamine-6-phosphate deaminase                                           | [c] : gam6p + h2o --> f6p + nh4                                         | 3.5.99.6 | Aminosugar Metabolism             | ( 10007.1 or 132789.1 )                            |
| G6PDH1er           | glucose-6-phosphate dehydrogenase, endoplasmic reticulum                    | [r] : g6p + nad --> 6pgl + h + nadh                                     |          | Pentose Phosphate Pathway         | 9563.1                                             |
| G6PDH1r            | glucose-6-phosphate dehydrogenase, endoplasmic reticulum                    | [r] : g6p + nad <=> 6pgl + h + nadh                                     |          | Pentose Phosphate Pathway         | 9563.1                                             |
| G6PDH2r            | glucose 6-phosphate dehydrogenase                                           | [c] : g6p + nadp <=> 6pgl + h + nadph                                   | 1.1.1.49 | Pentose Phosphate Pathway         | 2539.1                                             |
| G6PDH2rer          | glucose 6-phosphate dehydrogenase, endoplasmic reticulum                    | [r] : g6p + nadp <=> 6pgl + h + nadph                                   |          | Pentose Phosphate Pathway         | 9563.1                                             |
| G6PPer             | glucose-6-phosphate phosphatase, edoplasmic reticular                       | [r] : g6p + h2o --> gle-D + pi                                          | 3.1.3.9  | Glycolysis/Gluconeogenesis        | ( 57818.1 or 92579.1 or 2538.1 )                   |
| G6Pter             | glucose 6-phosphate endoplasmic reticular transport via diffusion           | g6p[c] <=> g6p[r]                                                       |          | Transport, Endoplasmic Reticular  | 2542.1                                             |
| GABAVESSEC         | GABA secretion via secretory vesicle (ATP driven)                           | (3) 4abut[c] + atp[c] + h2o[c] --> (3) 4abut[e] + adp[c] + h[c] + pi[c] |          | Transport, Extracellular          | 140679.1                                           |
| GACMTRc            | guanidinoacetate N-methyltransferase (c)                                    | [c] : amet + gudac <=> ahcys + creat + h                                | 2.1.1.2  | Urea cycle/amino group metabolism | ( 2593.1 or 2593.2 )                               |
| GACPAILter         | glucosaminyl-acylphosphatidylinositol ER flippase                           | gacpail_hs[c] --> gacpail_hs[r]                                         |          | Transport, Endoplasmic Reticular  |                                                    |
| GAL3ST11           | Galactosylceramide sulfotransferase                                         | [g] : galside_hs + paps --> h + pap + sgalside_hs                       | 2.8.2.11 | Sphingolipid Metabolism           | 9514.1                                             |
| GAL3ST12           | Galactosylceramide sulfotransferase                                         | [g] : digalside_hs + paps --> digalsgalside_hs + h + pap                | 2.8.2.11 | Sphingolipid Metabolism           | 9514.1                                             |
| GALACGLGALGBSIDEte | galacglgalgbside_hs transport                                               | galacglgalgbside_hs[c] <=> galacglgalgbside_hs[e]                       |          | Transport, Extracellular          |                                                    |
| GALACGLGALGBSIDEtg | galacglgalgbside_hs intracellular transport                                 | galacglgalgbside_hs[c] <=> galacglgalgbside_hs[g]                       |          | Transport, Golgi Apparatus        |                                                    |

| Abbreviation                           | Reaction Name                              | Reaction                                                                          | E.C. #   | Pathway                     | Gene association                                                        |
|----------------------------------------|--------------------------------------------|-----------------------------------------------------------------------------------|----------|-----------------------------|-------------------------------------------------------------------------|
| GALASE10ly                             | beta-galactosidase, lysosomal              | [I] : h2o + ksi_deg26 --> gal + ksi_deg27                                         | 3.2.1.23 | Keratan sulfate degradation | (( 2720.1 and 4758.1 and 2588.1 and 5476.1 ) or ( 2720.1 and 5476.1 ) ) |
| GALASE11ly                             | beta-galactosidase, lysosomal              | [I] : h2o + ksi_deg29 --> gal + ksi_deg30                                         | 3.2.1.23 | Keratan sulfate degradation | (( 4758.1 and 2588.1 and 5476.1 and 2720.1 ) or ( 2720.1 and 5476.1 ) ) |
| GALASE12ly                             | beta-galactosidase, lysosomal              | [I] : h2o + ksi_deg32 --> gal + ksi_deg33                                         | 3.2.1.23 | Keratan sulfate degradation | (( 5476.1 and 2720.1 and 2588.1 and 4758.1 ) or ( 2720.1 and 5476.1 ) ) |
| GALASE13ly                             | beta-galactosidase, lysosomal              | [I] : h2o + ksi_deg35 --> gal + ksi_deg36                                         | 3.2.1.23 | Keratan sulfate degradation | (( 2720.1 and 4758.1 and 2588.1 and 5476.1 ) or ( 2720.1 and 5476.1 ) ) |
| GALASE14ly                             | beta-galactosidase, lysosomal              | [I] : h2o + ksi_deg38 --> gal + ksi_deg39                                         | 3.2.1.23 | Keratan sulfate degradation | (( 5476.1 and 4758.1 and 2588.1 and 2720.1 ) or ( 2720.1 and 5476.1 ) ) |
| GALASE15ly                             | beta-galactosidase, lysosomal              | [I] : h2o + ksi_deg40 --> gal + ksi_deg41                                         | 3.2.1.23 | Keratan sulfate degradation | (( 2720.1 and 4758.1 and 2588.1 and 5476.1 ) or ( 5476.1 and 2720.1 ) ) |
| GALASE16ly                             | beta-galactosidase, lysosomal              | [I] : (2) h2o + ksii_core2_deg2 --> (2) gal + ksii_core2_deg3                     | 3.2.1.23 | Keratan sulfate degradation | (( 2720.1 and 2588.1 and 5476.1 and 4758.1 ) or ( 2720.1 and 5476.1 ) ) |
| GALASE17ly                             | beta-galactosidase, lysosomal              | [I] : h2o + ksii_core2_deg5 --> gal + ksii_core2_deg6                             | 3.2.1.23 | Keratan sulfate degradation | (( 2720.1 and 4758.1 and 5476.1 and 2588.1 ) or ( 5476.1 and 2720.1 ) ) |
| GALASE18ly                             | beta-galactosidase, lysosomal              | [I] : h2o + ksii_core2_deg8 --> gal + ksii_core2_deg9                             | 3.2.1.23 | Keratan sulfate degradation | (( 2720.1 and 4758.1 and 5476.1 and 2588.1 ) or ( 2720.1 and 5476.1 ) ) |
| GALASE19ly                             | beta-galactosidase, lysosomal              | [I] : f1a + h2o --> core6 + gal                                                   | 3.2.1.23 | Keratan sulfate degradation | (( 2720.1 and 4758.1 and 2588.1 and 5476.1 ) or ( 2720.1 and 5476.1 ) ) |
| GALASE1ly                              | beta-galactosidase, lysosomal              | [I] : (2) h2o + l2n2m2mn --> (2) gal + n2m2mn                                     | 3.2.1.23 | N-Glycan Degradation        | (( 2720.1 and 4758.1 and 2588.1 and 5476.1 ) or ( 2720.1 and 5476.1 ) ) |
| GALASE20ly                             | beta-galactosidase, lysosomal              | [I] : (2) h2o + ksii_core4_deg2 --> (2) gal + ksii_core4_deg3                     | 3.2.1.23 | Keratan sulfate degradation | (( 2588.1 and 5476.1 and 2720.1 and 4758.1 ) or ( 5476.1 and 2720.1 ) ) |
| GALASE3ly                              | beta-galactosidase, lysosomal              | [I] : (2) h2o + ksi_deg5 --> (2) gal + ksi_deg6                                   | 3.2.1.23 | Keratan sulfate degradation | (( 2588.1 and 5476.1 and 2720.1 and 4758.1 ) or ( 2720.1 and 5476.1 ) ) |
| GALASE4ly                              | beta-galactosidase, lysosomal              | [I] : h2o + ksi_deg8 --> gal + ksi_deg9                                           | 3.2.1.23 | Keratan sulfate degradation | (( 2720.1 and 2588.1 and 4758.1 and 5476.1 ) or ( 2720.1 and 5476.1 ) ) |
| GALASE5ly                              | beta-galactosidase, lysosomal              | [I] : h2o + ksi_deg11 --> gal + ksi_deg12                                         | 3.2.1.23 | Keratan sulfate degradation | (( 2720.1 and 2588.1 and 4758.1 and 5476.1 ) or ( 2720.1 and 5476.1 ) ) |
| GALASE6ly                              | beta-galactosidase, lysosomal              | [I] : h2o + ksi_deg14 --> gal + ksi_deg15                                         | 3.2.1.23 | Keratan sulfate degradation | (( 5476.1 and 2588.1 and 2720.1 and 4758.1 ) or ( 5476.1 and 2720.1 ) ) |
| GALASE7ly                              | beta-galactosidase, lysosomal              | [I] : h2o + ksi_deg17 --> gal + ksi_deg18                                         | 3.2.1.23 | Keratan sulfate degradation | (( 4758.1 and 2720.1 and 2588.1 and 5476.1 ) or ( 2720.1 and 5476.1 ) ) |
| GALASE8ly                              | beta-galactosidase, lysosomal              | [I] : h2o + ksi_deg20 --> gal + ksi_deg21                                         | 3.2.1.23 | Keratan sulfate degradation | (( 2588.1 and 4758.1 and 5476.1 and 2720.1 ) or ( 2720.1 and 5476.1 ) ) |
| GALASE9ly                              | beta-galactosidase, lysosomal              | [I] : h2o + ksi_deg23 --> gal + ksi_deg24                                         | 3.2.1.23 | Keratan sulfate degradation | (( 2720.1 and 5476.1 and 2588.1 and 4758.1 ) or ( 2720.1 and 5476.1 ) ) |
| GALC                                   | Galactocerebrosidase                       | [I] : galside_hs + h2o --> crm_hs + gal                                           | 3.2.1.46 | Sphingolipid Metabolism     | 2581.1                                                                  |
| GALFUC12GAL14ACGLCGALGLUSIDEIte        | blood group intracellular transport        | galfuc12gal14acglcgalside_hs[e] <=> galfuc12gal14acglcgalside_hs[c]               |          | Transport, Extracellular    |                                                                         |
| GALFUC12GAL14ACGLCGALGLUSIDEIeg        | blood group intracellular transport        | galfuc12gal14acglcgalside_hs[g] <=> galfuc12gal14acglcgalside_hs[c]               |          | Transport, Golgi Apparatus  |                                                                         |
| GALFUCGALACGLCGAL14ACGLCGALGLUSIDEIte  | blood group intracellular transport        | galfucgalacglcg14acglcgalside_hs[e] <=> galfucgalacglcg14acglcgalside_hs[c]       |          | Transport, Extracellular    |                                                                         |
| GALFUCGALACGLCGAL14ACGLCGALGLUSIDEIeg  | blood group intracellular transport        | galfucgalacglcg14acglcgalside_hs[g] <=> galfucgalacglcg14acglcgalside_hs[c]       |          | Transport, Golgi Apparatus  |                                                                         |
| GALGALFUCGALACGLCGALACGLCGALGLUSIDEIte | blood group intracellular transport        | galgalfucgalacglcg14acglcgalside_hs[e] <=> galgalfucgalacglcg14acglcgalside_hs[c] |          | Transport, Extracellular    |                                                                         |
| GALGALFUCGALACGLCGALACGLCGALGLUSIDEIeg | blood group intracellular transport        | galgalfucgalacglcg14acglcgalside_hs[g] <=> galgalfucgalacglcg14acglcgalside_hs[c] |          | Transport, Golgi Apparatus  |                                                                         |
| GALGALGALTHCRMte                       | galgalgalthrm_hs transport                 | galgalgalthrm_hs[c] <=> galgalgalthrm_hs[e]                                       |          | Transport, Extracellular    |                                                                         |
| GALGALGALTHCRMg                        | galgalgalthrm_hs intracellular transport   | galgalgalthrm_hs[c] <=> galgalgalthrm_hs[g]                                       |          | Transport, Golgi Apparatus  |                                                                         |
| GALGLUSIDEIte                          | galgluside_hs intracellular transport      | galgluside_hs[c] <=> galgluside_hs[g]                                             |          | Transport, Golgi Apparatus  |                                                                         |
| GALGLUSIDEIte                          | galgluside_hs intracellular transport      | galgluside_hs[c] <=> galgluside_hs[l]                                             |          | Transport, Lysosomal        |                                                                         |
| GALGT1                                 | Beta-1,4 N-acetylgalactosaminyltransferase | [g] : galgluside_hs + udpacgal --> ga2_hs + h + udp                               | 2.4.1.92 | Sphingolipid Metabolism     | 2583.1                                                                  |

| Abbreviation | Reaction Name                                                                              | Reaction                                              | E.C. #    | Pathway                                    | Gene association                                                                                                                                                                          |
|--------------|--------------------------------------------------------------------------------------------|-------------------------------------------------------|-----------|--------------------------------------------|-------------------------------------------------------------------------------------------------------------------------------------------------------------------------------------------|
| GALGT2       | Beta-1,4 N-acetylgalactosaminyltransferase                                                 | [g] : gm3_hs + udpacgal -> gm2_hs + h + udp           | 2.4.1.92  | Sphingolipid Metabolism                    | 2583.1                                                                                                                                                                                    |
| GALGT3       | Beta-1,4 N-acetylgalactosaminyltransferase                                                 | [g] : gd3_hs + udpacgal -> gd2_hs + h + udp           | 2.4.1.92  | Sphingolipid Metabolism                    | 2583.1                                                                                                                                                                                    |
| GALGT4       | Beta-1,4 N-acetylgalactosaminyltransferase                                                 | [g] : gt3_hs + udpacgal -> gt2_hs + h + udp           | 2.4.1.92  | Sphingolipid Metabolism                    | 2583.1                                                                                                                                                                                    |
| GALK         | galactokinase                                                                              | [c] : atp + gal -> adp + gal1p + h                    | 2.7.1.6   | Galactose metabolism                       | ( 2584.1 or 2585.1 or 2585.2 )                                                                                                                                                            |
| GALNACT1g    | UDPGal-chondroitin acetylgalactosaminyltransferase I, Golgi                                | [g] : cs_hs_linkage + udpacgal -> cs_pre + h + udp    | 2.4.1.174 | Chondroitin / heparan sulfate biosynthesis | ( 55790.1 or 55454.1 )                                                                                                                                                                    |
| GALNACT2g    | uridine diphosphoacetylgalactosamine-chondroitin acetylgalactosaminyltransferase II, Golgi | [g] : cs_a_b_pre2 + uacgam -> cs_a_b_pre3 + h + udp   | 2.4.1.175 | Chondroitin / heparan sulfate biosynthesis | ( ( 79586.1 and 22856.1 ) or 337876.1 or 55454.1 or 55790.1 )                                                                                                                             |
| GALNACT3g    | uridine diphosphoacetylgalactosamine-chondroitin acetylgalactosaminyltransferase II, Golgi | [g] : cs_c_pre2 + uacgam -> cs_c_pre3 + h + udp       | 2.4.1.175 | Chondroitin / heparan sulfate biosynthesis | ( ( 79586.1 and 22856.1 ) or 337876.1 or 55454.1 or 55790.1 )                                                                                                                             |
| GALNACT4g    | uridine diphosphoacetylgalactosamine-chondroitin acetylgalactosaminyltransferase II, Golgi | [g] : cs_d_pre3 + uacgam -> cs_d_pre4 + h + udp       | 2.4.1.175 | Chondroitin / heparan sulfate biosynthesis | ( ( 79586.1 and 22856.1 ) or 337876.1 or 55454.1 or 55790.1 )                                                                                                                             |
| GALNACT5g    | uridine diphosphoacetylgalactosamine-chondroitin acetylgalactosaminyltransferase II, Golgi | [g] : cs_e_pre3 + uacgam -> cs_e_pre4 + h + udp       | 2.4.1.175 | Chondroitin / heparan sulfate biosynthesis | ( ( 79586.1 and 22856.1 ) or 337876.1 or 55454.1 or 55790.1 )                                                                                                                             |
| GALNTg       | GalNAc transferase, Golgi apparatus                                                        | [g] : Ser/Thr + udpacgal -> Tu_antigen + h + udp      | 2.4.1.41  | O-Glycan Biosynthesis                      | ( 2590.1 or 11226.1 or 2589.1 or 51809.1 or 2591.1 or 26290.1 or 50614.1 or 55568.1 or 8693.1 or 63917.1 or 79695.1 or 114805.1 or 79623.1 or 11227.1 or 117248.1 or 26290.1 or 55568.2 ) |
| GALOR        | D-Galactose:NADP+ 1-oxidoreductase                                                         | [c] : gal + h + nadph <=> galt + nadp                 | 1.1.1.21  | Galactose metabolism                       | ( 231.1 or 10327.1 or 10327.2 )                                                                                                                                                           |
| GALSIDEtg    | galactocerebroside intracellular transport                                                 | galside_hs[c] <=> galside_hs[g]                       |           | Transport, Golgi Apparatus                 |                                                                                                                                                                                           |
| GALSIDEtl    | galactocerebroside intracellular transport                                                 | galside_hs[c] <=> galside_hs[l]                       |           | Transport, Lysosomal                       |                                                                                                                                                                                           |
| GALT         | galactose-1-phosphate uridylyltransferase                                                  | [c] : gal1p + h + utp <=> ppi + udpgal                | 2.7.7.10  | Galactose metabolism                       | ( 2592.1 or 2592.2 or 2592.3 )                                                                                                                                                            |
| GAL1tr       | galactose transport (uniport)                                                              | gal[e] <=> gal[c]                                     |           | Transport, Extracellular                   | ( 6513.1 or 6514.1 or 6515.1 or 29988.1 or 81031.1 )                                                                                                                                      |
| GAL2_2       | D-galactose transport via proton symport                                                   | gal[e] + (2) h[e] <=> gal[c] + (2) h[c]               |           | Transport, Extracellular                   | 6523.1                                                                                                                                                                                    |
| GALT2g       | UDP-D-galactose:galactosylxylose galactosyltransferase, Golgi apparatus                    | [g] : lxsxr + udpgal -> h + l2xsxr + udp              | 2.4.1.134 | Chondroitin / heparan sulfate biosynthesis | 126792.1                                                                                                                                                                                  |
| GAL4         | galactose transport via sodium symport                                                     | gal[e] + na[e] <=> gal[c] + na[c]                     |           | Transport, Extracellular                   | 200010.1                                                                                                                                                                                  |
| GAL4_2       | galactose transport via sodium symport                                                     | gal[e] + (2) na[e] <=> gal[c] + (2) na[c]             |           | Transport, Extracellular                   | 6523.1                                                                                                                                                                                    |
| GALTg        | UDP-D-galactose:D-xylose galactosyltransferase, Golgi apparatus                            | [g] : udpgal + xsxr -> h + lxsxr + udp                | 2.4.1.133 | Chondroitin / heparan sulfate biosynthesis | 11285.1                                                                                                                                                                                   |
| GAL1y        | galactose efflux from lysosome                                                             | gal[l] -> gal[c]                                      |           | Transport, Lysosomal                       |                                                                                                                                                                                           |
| GALU         | UTP-glucose-1-phosphate uridylyltransferase                                                | [c] : g1p + h + utp <=> ppi + udpg                    | 2.7.7.9   | Galactose metabolism                       | ( 7360.1 or 7360.2 or 7359.1 )                                                                                                                                                            |
| GAM1r        | glucosamine transport (uniport)                                                            | gam[e] <=> gam[c]                                     |           | Transport, Extracellular                   | ( 6513.1 or 6514.1 or 6517.1 )                                                                                                                                                            |
| GAMYe        | glucoamylase, extracellular (glycn5 -> malt)                                               | [e] : glycn5 + h2o -> Tyr-ggn + malt                  | 3.2.1.3   | Starch and Sucrose Metabolism              | 8972.1                                                                                                                                                                                    |
| GAO1         | Ganglioside O-acetylation                                                                  | [c] : accoa + gd3_hs -> coa + oagd3_hs                |           | Sphingolipid Metabolism                    | 9197.1                                                                                                                                                                                    |
| GAO1g        | Ganglioside O-acetylation                                                                  | [g] : accoa + gd3_hs -> coa + oagd3_hs                |           | Sphingolipid Metabolism                    | 9197.1                                                                                                                                                                                    |
| GAO2         | Ganglioside O-acetylation                                                                  | [c] : accoa + gt3_hs -> coa + oagt3_hs                |           | Sphingolipid Metabolism                    | 9197.1                                                                                                                                                                                    |
| GAO2g        | Ganglioside O-acetylation                                                                  | [g] : accoa + gt3_hs -> coa + oagt3_hs                |           | Sphingolipid Metabolism                    | 9197.1                                                                                                                                                                                    |
| GAPD         | glyceraldehyde-3-phosphate dehydrogenase                                                   | [c] : g3p + nad + pi <=> 13dpg + h + nadh             | 1.2.1.12  | Glycolysis/Gluconeogenesis                 | ( 2597.1 or 26330.1 )                                                                                                                                                                     |
| GARTF        | phosphoribosylglycinamide formyltransferase                                                | [c] : 10thf + gar <=> fgam + h + thf                  | 2.1.2.2   | IMP Biosynthesis                           | ( 2618.1 or 2618.2 )                                                                                                                                                                      |
| GASNASE2ly   | glycosylasparaginase, lysosomal                                                            | [l] : h2o + n2m2nmasn -> Asn-X-Ser/Thr + n2m2nm       | 3.5.1.26  | N-Glycan Degradation                       | 175.1                                                                                                                                                                                     |
| GASNASE3ly   | glycosylasparaginase, lysosomal                                                            | [l] : h2o + ksi_deg1 -> Asn-X-Ser/Thr + ksi_deg2      | 3.5.1.26  | Keratan sulfate degradation                | 175.1                                                                                                                                                                                     |
| GASNASEly    | glycosylasparaginase, lysosomal                                                            | [l] : h2o + s2l2n2m2masn -> Asn-X-Ser/Thr + s2l2n2m2m | 3.5.1.26  | N-Glycan Degradation                       | 175.1                                                                                                                                                                                     |
| GBA          | Glucosylceramidase                                                                         | [c] : gluside_hs + h2o -> crm_hs + glc-D              | 3.2.1.45  | Sphingolipid Metabolism                    | ( 2629.3 or 2629.5 or 2629.4 or 2629.2 or 2629.1 )                                                                                                                                        |
| GBA1         | Glucosylceramidase                                                                         | [l] : gluside_hs + h2o -> crm_hs + glc-D              | 3.2.1.45  | Sphingolipid Metabolism                    | ( 2629.1 or 2629.2 or 2629.3 or 2629.4 or 2629.5 )                                                                                                                                        |
| GBGT1        | globoside alpha-1,3-N-acetylgalactosaminyltransferase 1                                    | [g] : gbside_hs + udpacgal -> acagbside_hs + h + udp  |           | Sphingolipid Metabolism                    | 26301.1                                                                                                                                                                                   |
| GBSIDEte     | globoside transport                                                                        | gbside_hs[c] <=> gbside_hs[e]                         |           | Transport, Extracellular                   |                                                                                                                                                                                           |
| GBSIDEtl     | globoside intracellular transport                                                          | gbside_hs[c] <=> gbside_hs[l]                         |           | Transport, Lysosomal                       |                                                                                                                                                                                           |
| GCALDD       | Glycolaldehyde dehydrogenase                                                               | [c] : gcald + h2o + nad -> glyclt + (2) h + nadh      | 1.2.1.21  | Glyoxylate and Dicarboxylate Metabolism    | ( 216.1 or 8854.1 or 8854.2 or 8854.3 or 220.1 or 218.1 or 224.1 or 221.1 or 222.1 or 501.1 or 223.1 )                                                                                    |
| GCALDDm      | Glycolaldehyde dehydrogenase, mitochondrial                                                | [m] : gcald + h2o + nad -> glyclt + (2) h + nadh      | 1.2.1.21  | Glyoxylate and Dicarboxylate Metabolism    | ( 5832.1 or 219.1 or 217.1 or 8659.1 or 8659.2 or 7915.1 or 7915.2 or 4329.1 )                                                                                                            |
| GCC2am       | glycine-cleavage complex (lipoamide), mitochondrial                                        | [m] : gly + h + lpm <=> alpam + co2                   | 1.4.4.2   | Glycine, Serine, and Threonine Metabolism  | ( 2731.1 and 2653.1 and 1738.1 and 275.1 )                                                                                                                                                |
| GCC2bin      | glycine-cleavage system (lipoamide) irreversible, mitochondrial                            | [m] : alpam + thf -> dhlm + mlthf + nh4               | 2.1.2.10  | Glycine, Serine, and Threonine Metabolism  | ( 1738.1 and 275.1 and 2653.1 and 2731.1 )                                                                                                                                                |
| GCC2cm       | glycine-cleavage complex (lipoamide), mitochondrial                                        | [m] : dhlm + nad <=> h + lpm + nadh                   | 1.8.1.4   | Glycine, Serine, and Threonine Metabolism  | ( 1738.1 and 275.1 and 2731.1 and 2653.1 )                                                                                                                                                |
| GCCam        | glycine-cleavage complex (lipoylprotein), mitochondrial                                    | [m] : gly + h + lpro <=> alpro + co2                  | 1.4.4.2   | Glycine, Serine, and Threonine Metabolism  | ( 1738.1 and 2731.1 and 275.1 and 2653.1 )                                                                                                                                                |
| GCCbin       | glycine-cleavage complex (lipoylprotein) irreversible, mitochondrial                       | [m] : alpro + thf -> dhpro + mlthf + nh4              | 2.1.2.10  | Glycine, Serine, and Threonine Metabolism  | ( 275.1 and 2653.1 and 1738.1 and 2731.1 )                                                                                                                                                |

| Abbreviation    | Reaction Name                                                  | Reaction                                                                                     | E.C. #    | Pathway                                   | Gene association                                                                                     |
|-----------------|----------------------------------------------------------------|----------------------------------------------------------------------------------------------|-----------|-------------------------------------------|------------------------------------------------------------------------------------------------------|
| GCCcm           | glycine-cleavage complex (lipoyprotein), mitochondrial         | [m] : dhipro + nad <=> h + lpro + nadh                                                       | 1.8.1.4   | Glycine, Serine, and Threonine Metabolism | ( 1738.1 and 2653.1 and 2731.1 and 275.1 )                                                           |
| GCHOLAt         | glycocholate transport via bicarbonate countertransport        | gchola[e] + hco3[c] <=> gchola[c] + hco3[e]                                                  |           | Transport, Extracellular                  | ( 6579.1 or 10599.1 or 28234.1 )                                                                     |
| GCHOLA2         | glycocholate transport via sodium cotransport                  | gchola[e] + (2) na1[e] --> gchola[c] + (2) na1[c]                                            |           | Transport, Extracellular                  | ( 6554.1 or 6555.1 )                                                                                 |
| GCHOLA3         | ABC bile acid transporter                                      | atp[c] + gchola[c] + h2o[c] --> adp[c] + gchola[e] + h[c] + pi[c]                            |           | Transport, Extracellular                  | ( 8647.1 or 8714.1 or 8714.2 or 8714.3 )                                                             |
| GCHOLAt         | bile acid intracellular transport                              | gchola[e] <=> gchola[c]                                                                      |           | Transport, Extracellular                  |                                                                                                      |
| GCHOLAtx        | bile acid intracellular transport                              | gchola[x] <=> gchola[c]                                                                      |           | Transport, Peroxisomal                    |                                                                                                      |
| GCNTg           | N-acetylactosaminide beta-1,6-N-acetylglucosaminyl transferase | [g] : galaclegal14aclegalglucose_hs + uacgam --> aclegalaclegal14aclegalglucose_hs + h + udp | 2.4.1.150 | Blood Group Biosynthesis                  | 2651.1                                                                                               |
| GD1B2e          | gd1b2_hs transport                                             | gd1b2_hs[c] <=> gd1b2_hs[e]                                                                  |           | Transport, Extracellular                  |                                                                                                      |
| GD1B2g          | gd1b2_hs intracellular transport                               | gd1b2_hs[c] <=> gd1b2_hs[g]                                                                  |           | Transport, Golgi Apparatus                |                                                                                                      |
| GD1Ct           | gd1c_hs transport                                              | gd1c_hs[c] <=> gd1c_hs[e]                                                                    |           | Transport, Extracellular                  |                                                                                                      |
| GD1Cg           | gd1c_hs intracellular transport                                | gd1c_hs[c] <=> gd1c_hs[g]                                                                    |           | Transport, Golgi Apparatus                |                                                                                                      |
| GDCHOLAt        | bile acid intracellular transport                              | gdchola[e] <=> gdchola[c]                                                                    |           | Transport, Extracellular                  |                                                                                                      |
| GDCHOLAtx       | bile acid intracellular transport                              | gdchola[x] <=> gdchola[c]                                                                    |           | Transport, Peroxisomal                    |                                                                                                      |
| GDPFUCg         | GDPFuc Golgi transport via CMP antiport                        | gdpfuc[c] + gmp[g] <=> gdpfuc[g] + gmp[c]                                                    |           | Transport, Golgi Apparatus                | 55343.1                                                                                              |
| GDPpg           | GDP intracellular transport                                    | gdp[c] <=> gdp[g]                                                                            |           | Transport, Golgi Apparatus                |                                                                                                      |
| GF6PTA          | glutamine-fructose-6-phosphate transaminase                    | [c] : f6p + glu-L --> gam6p + glu-L                                                          | 2.6.1.16  | Aminosugar Metabolism                     | ( 2673.1 or 9945.1 )                                                                                 |
| GFUCS           | GDP-L-fucose synthase                                          | [c] : gdpdman + h + nadph --> gdpfuc + nadp                                                  | 1.1.1.271 | Fructose and Mannose Metabolism           | 7264.1                                                                                               |
| GGH-10FTHF5GLUe | Gamma-glutamyl hydrolase (10FTHF5GLU), extracellular           | [e] : 10fthf5glu + (4) h2o --> 10fthf + (4) glu-L                                            |           | Folate Metabolism                         | 8836.1                                                                                               |
| GGH-10FTHF5GLUl | Gamma-glutamyl hydrolase (10FTHF5GLU), lysosomal               | [l] : 10fthf5glu + (4) h2o --> 10fthf + (4) glu-L                                            |           | Folate Metabolism                         | 8836.1                                                                                               |
| GGH-10FTHF6GLUe | Gamma-glutamyl hydrolase (10FTHF6GLU), extracellular           | [e] : 10fthf6glu + h2o --> 10fthf5glu + glu-L                                                |           | Folate Metabolism                         | 8836.1                                                                                               |
| GGH-10FTHF6GLUl | Gamma-glutamyl hydrolase (10FTHF6GLU), lysosomal               | [l] : 10fthf6glu + h2o --> 10fthf5glu + glu-L                                                |           | Folate Metabolism                         | 8836.1                                                                                               |
| GGH-10FTHF7GLUe | Gamma-glutamyl hydrolase (10FTHF7GLU), extracellular           | [e] : 10fthf7glu + h2o --> 10fthf6glu + glu-L                                                |           | Folate Metabolism                         | 8836.1                                                                                               |
| GGH-10FTHF7GLUl | Gamma-glutamyl hydrolase (10FTHF7GLU), lysosomal               | [l] : 10fthf7glu + h2o --> 10fthf6glu + glu-L                                                |           | Folate Metabolism                         | 8836.1                                                                                               |
| GGH-5DHFe       | Gamma-glutamyl hydrolase (5DHF), extracellular                 | [e] : 5dhf + (4) h2o --> dhf + (4) glu-L                                                     |           | Folate Metabolism                         | 8836.1                                                                                               |
| GGH-5DHF1       | Gamma-glutamyl hydrolase (5DHF), lysosomal                     | [l] : 5dhf + (4) h2o --> dhf + (4) glu-L                                                     |           | Folate Metabolism                         | 8836.1                                                                                               |
| GGH-5THFe       | Gamma-glutamyl hydrolase (5THF), extracellular                 | [e] : 5thf + (4) h2o --> (4) glu-L + thf                                                     |           | Folate Metabolism                         | 8836.1                                                                                               |
| GGH-5THF1       | Gamma-glutamyl hydrolase (5THF), lysosomal                     | [l] : 5thf + (4) h2o --> (4) glu-L + thf                                                     |           | Folate Metabolism                         | 8836.1                                                                                               |
| GGH-6DHFe       | Gamma-glutamyl hydrolase (6DHF), extracellular                 | [e] : 6dhf + h2o --> 5dhf + glu-L                                                            |           | Folate Metabolism                         | 8836.1                                                                                               |
| GGH-6DHF1       | Gamma-glutamyl hydrolase (6DHF), lysosomal                     | [l] : 6dhf + h2o --> 5dhf + glu-L                                                            |           | Folate Metabolism                         | 8836.1                                                                                               |
| GGH-6THFe       | Gamma-glutamyl hydrolase (6THF), extracellular                 | [e] : 6thf + h2o --> 5thf + glu-L                                                            |           | Folate Metabolism                         | 8836.1                                                                                               |
| GGH-6THF1       | Gamma-glutamyl hydrolase (6THF), lysosomal                     | [l] : 6thf + h2o --> 5thf + glu-L                                                            |           | Folate Metabolism                         | 8836.1                                                                                               |
| GGH-7DHFe       | Gamma-glutamyl hydrolase (7DHF), extracellular                 | [e] : 7dhf + h2o --> 6dhf + glu-L                                                            |           | Folate Metabolism                         | 8836.1                                                                                               |
| GGH-7DHF1       | Gamma-glutamyl hydrolase (7DHF), lysosomal                     | [l] : 7dhf + h2o --> 6dhf + glu-L                                                            |           | Folate Metabolism                         | 8836.1                                                                                               |
| GGH-7THFe       | Gamma-glutamyl hydrolase (7THF), extracellular                 | [e] : 7thf + h2o --> 6thf + glu-L                                                            |           | Folate Metabolism                         | 8836.1                                                                                               |
| GGH-7THF1       | Gamma-glutamyl hydrolase (7THF), lysosomal                     | [l] : 7thf + h2o --> 6thf + glu-L                                                            |           | Folate Metabolism                         | 8836.1                                                                                               |
| GGLUCT          | gamma-glutamylcyclotransferase                                 | ghua[e] --> 5oxpro[c] + ala-L[c]                                                             | 2.3.2.4   | Glutathione Metabolism                    | 2655.1                                                                                               |
| GGNG            | glycogenin self-glycosylation                                  | [c] : Tyr-ggn + (8) udpg --> ggn + (8) h + (8) udp                                           |           | Starch and Sucrose Metabolism             | ( ( 2992.1 and 2998.1 ) or ( 2997.1 and 8908.1 ) or ( 2992.1 and 2997.1 ) or ( 8908.1 and 2998.1 ) ) |
| GGT_L           | geranylgeranyltransferase (liver)                              | [c] : (17.6) ipdp + ttc-ggdp --> (0.1) dedoldp_L + (17.6) ppi                                |           | N-Glycan Biosynthesis                     |                                                                                                      |
| GGT_U           | geranylgeranyltransferase (uterus)                             | [c] : (16.5) ipdp + ttc-ggdp --> (0.1) dedoldp_U + (16.5) ppi                                |           | N-Glycan Biosynthesis                     |                                                                                                      |
| GGT5r           | Gamma-glutamyltransferase 5                                    | [r] : h2o + leuktrC4 <=> glu-L + leuktrD4                                                    | 2.3.2.2   | Eicosanoid Metabolism                     | 2687.1                                                                                               |
| GGT6            | Gamma-glutamyltransferase                                      | [c] : glu-L + leuktrE4 <=> h2o + leuktrF4                                                    | 2.3.2.2   | Eicosanoid Metabolism                     |                                                                                                      |
| GHMT2r          | glycine hydroxymethyltransferase, reversible                   | [c] : ser-L + thf <=> gly + h2o + mlthf                                                      | 2.1.2.1   | Glycine, Serine, and Threonine Metabolism | ( 6470.1 or 6470.2 )                                                                                 |
| GHMT2rm         | glycine hydroxymethyltransferase, reversible, mitochondrial    | [m] : ser-L + thf <=> gly + h2o + mlthf                                                      | 2.1.2.1   | Glycine, Serine, and Threonine Metabolism | 6472.1                                                                                               |
| GHMT3           | glycine hydroxymethyltransferase                               | [c] : 3hmtlys + h --> 4meabut + gly                                                          | 2.1.2.1   | Lysine Metabolism                         | ( 6470.1 or 6470.2 )                                                                                 |
| GHMT3m          | glycine hydroxymethyltransferase, mitochondrial                | [m] : 3hmtlys + h --> 4meabut + gly                                                          | 2.1.2.1   | Lysine Metabolism                         | 6472.1                                                                                               |
| GK1             | guanylate kinase (GMP-ATP)                                     | [c] : atp + gmp <=> adp + gdp                                                                | 2.7.4.8   | Nucleotides                               | 2987.1                                                                                               |
| GK1m            | guanylate kinase (GMP-ATP), mitochondrial                      | [m] : atp + gmp <=> adp + gdp                                                                | 2.7.4.8   | Nucleotides                               |                                                                                                      |
| GLACO           | D-Gluconolactone:NAD+ oxidoreductase                           | [c] : glac + (2) h2o + nad --> gler + (3) h + nadh                                           | 1.2.1.3   | Ascorbate and Aldarate Metabolism         | ( 216.1 or 218.1 or 220.1 or 221.1 or 222.1 or 223.1 or 224.1 or 8854.1 or 8854.2 or 8854.3 )        |
| GLACOm          | D-Gluconolactone:NAD+ oxidoreductase, mitochondrial            | [m] : glac + (2) h2o + nad --> gler + (3) h + nadh                                           | 1.2.1.3   | Ascorbate and Aldarate Metabolism         | ( 217.1 or 219.1 or 8659.1 or 8659.2 )                                                               |
| GLACter         | D-glucono-6,3-lactone transport, endoplasmic reticulum         | glac[c] <=> glac[r]                                                                          |           | Transport, Endoplasmic Reticular          |                                                                                                      |
| GLA1            | galactosidase, alpha                                           | [l] : digalside_hs + h2o --> gal + galside_hs                                                | 3.2.1.22  | Sphingolipid Metabolism                   | 2717.1                                                                                               |
| GLB1            | Beta-galactosidase                                             | [l] : galglucose_hs + h2o --> gal + glucose_hs                                               | 3.2.1.23  | Sphingolipid Metabolism                   | ( ( 4758.1 and 2588.1 and 2720.1 and 5476.1 ) or ( 5476.1 and 2720.1 ) )                             |
| GLBRAN          | 1,4-alpha-glucan branching enzyme (glygn1 -> glygn2)           | [c] : glygn1 --> glygn2                                                                      | 2.4.1.18  | Starch and Sucrose Metabolism             | 2632.1                                                                                               |
| GLCAASE1ly      | beta-glucuronidase, lysosomal                                  | [l] : h2o + hs_deg9 --> gleur + hs_deg10                                                     | 3.2.1.31  | Heparan sulfate degradation               | 2990.1                                                                                               |
| GLCAASE4ly      | beta-glucuronidase, lysosomal                                  | [l] : cs_a_deg2 + h2o --> cs_a_deg3 + gleur                                                  | 3.2.1.31  | Chondroitin sulfate degradation           | 2990.1                                                                                               |



| Abbreviation | Reaction Name                                                                                    | Reaction                                                                   | E.C. #    | Pathway                                    | Gene association                                                                                                                               |
|--------------|--------------------------------------------------------------------------------------------------|----------------------------------------------------------------------------|-----------|--------------------------------------------|------------------------------------------------------------------------------------------------------------------------------------------------|
| GLCAASE5ly   | beta-glucuronidase, lysosomal                                                                    | [l] : cs_e_deg2 + h2o --> cs_e_deg3 + glcur                                | 3.2.1.31  | Chondroitin sulfate degradation            | 2990.1                                                                                                                                         |
| GLCAASE6ly   | beta-glucuronidase, lysosomal                                                                    | [l] : cs_d_deg3 + h2o --> cs_d_deg4 + glcur                                | 3.2.1.31  | Chondroitin sulfate degradation            | 2990.1                                                                                                                                         |
| GLCAASE7ly   | beta-glucuronidase, lysosomal                                                                    | [l] : cs_e_deg3 + h2o --> cs_e_deg4 + glcur                                | 3.2.1.31  | Chondroitin sulfate degradation            | 2990.1                                                                                                                                         |
| GLCAASE8ly   | beta-glucuronidase, lysosomal                                                                    | [l] : h2o + ha --> glcur + ha_deg1                                         | 3.2.1.31  | Hyaluronan Metabolism                      | 2990.1                                                                                                                                         |
| GLCAASE9ly   | beta-glucuronidase, lysosomal                                                                    | [l] : (2) h2o + ha_pre1 --> acgam + glcur                                  | 3.2.1.31  | Hyaluronan Metabolism                      | 2990.1                                                                                                                                         |
| GLCAE1g      | chondroitin-glucuronate 5-epimerase                                                              | [g] : cs_ab_pre3 --> cs_b_pre4                                             | 5.1.3.19  | Chondroitin / heparan sulfate biosynthesis |                                                                                                                                                |
| GLCAE2g      | heparosan-N-sulfate-glucuronate 5-epimerase                                                      | [g] : hs_pre10 --> hs_pre11                                                | 5.1.3.17  | Chondroitin / heparan sulfate biosynthesis | 26035.1                                                                                                                                        |
| GLCAT2g      | chondroitin glucuronyltransferase II, Golgi apparatus                                            | [g] : cs_ab_e_pre1 + udpglcur --> cs_ab_pre2 + h + udp                     |           | Chondroitin / heparan sulfate biosynthesis | ( 54480.1 or ( 79586.1 and 22856.1 ) or 337876.1 )                                                                                             |
| GLCAT3g      | chondroitin glucuronyltransferase II, Golgi apparatus                                            | [g] : cs_c_d_e_pre1 + udpglcur --> cs_c_pre2 + h + udp                     |           | Chondroitin / heparan sulfate biosynthesis | ( 54480.1 or ( 79586.1 and 22856.1 ) or 337876.1 )                                                                                             |
| GLCAT4g      | chondroitin glucuronyltransferase II, Golgi apparatus                                            | [g] : cs_d_pre2 + udpglcur --> cs_d_pre3 + h + udp                         |           | Chondroitin / heparan sulfate biosynthesis | ( 54480.1 or ( 79586.1 and 22856.1 ) or 337876.1 )                                                                                             |
| GLCAT5g      | chondroitin glucuronyltransferase II, Golgi apparatus                                            | [g] : cs_e_pre2 + udpglcur --> cs_e_pre3 + h + udp                         |           | Chondroitin / heparan sulfate biosynthesis | ( 54480.1 or ( 22856.1 and 79586.1 ) or 337876.1 )                                                                                             |
| GLCAT6g      | heparan glucuronyltransferase II                                                                 | [g] : hs_pre1 + udpglcur --> h + hs_pre2 + udp                             |           | Chondroitin / heparan sulfate biosynthesis | ( ( 2131.1 and 2132.1 ) or ( 2132.2 and 2131.1 ) )                                                                                             |
| GLCAT7g      | heparan glucuronyltransferase II                                                                 | [g] : hs_pre3 + udpglcur --> h + hs_pre4 + udp                             |           | Chondroitin / heparan sulfate biosynthesis | ( ( 2131.1 and 2132.1 ) or ( 2132.2 and 2131.1 ) )                                                                                             |
| GLCAT8g      | heparan glucuronyltransferase II                                                                 | [g] : hs_pre5 + udpglcur --> h + hs_pre6 + udp                             |           | Chondroitin / heparan sulfate biosynthesis | ( ( 2131.1 and 2132.1 ) or ( 2132.2 and 2131.1 ) )                                                                                             |
| GLCAT9g      | heparan glucuronyltransferase II                                                                 | [g] : hs_pre7 + udpglcur --> h + hs_pre8 + udp                             |           | Chondroitin / heparan sulfate biosynthesis | ( ( 2131.1 and 2132.1 ) or ( 2132.2 and 2131.1 ) )                                                                                             |
| GLCATg       | UDP-D-glucuronate:galactosylgalactosylxylose glucuronosyltransferase, Golgi apparatus            | [g] : l2xser + udpglcur --> cs_hs_linkage + h + udp                        | 2.4.1.135 | Chondroitin / heparan sulfate biosynthesis | ( 135152.1 or 26229.1 or 27087.1 or 27087.2 )                                                                                                  |
| GLCMter      | glucose transport via membrane vesicle                                                           | gle-D[r] --> gle-D[e]                                                      |           | Transport, Extracellular                   |                                                                                                                                                |
| GLCNACASE1ly | alpha-N-acetylglucosaminidase, lysosomal                                                         | [l] : h2o + hs_deg3 --> acgam + hs_deg4                                    | 3.2.1.50  | Heparan sulfate degradation                | 4669.1                                                                                                                                         |
| GLCNACASE2ly | alpha-N-acetylglucosaminidase, lysosomal                                                         | [l] : h2o + hs_deg8 --> acgam + hs_deg9                                    | 3.2.1.50  | Heparan sulfate degradation                | 4669.1                                                                                                                                         |
| GLCNACASE3ly | alpha-N-acetylglucosaminidase, lysosomal                                                         | [l] : h2o + hs_deg14 --> acgam + hs_deg15                                  | 3.2.1.50  | Heparan sulfate degradation                | 4669.1                                                                                                                                         |
| GLCNACASE4ly | alpha-N-acetylglucosaminidase, lysosomal                                                         | [l] : h2o + hs_deg20 --> acgam + hs_deg21                                  | 3.2.1.50  | Heparan sulfate degradation                | 4669.1                                                                                                                                         |
| GLCNACASE5ly | alpha-N-acetylglucosaminidase, lysosomal                                                         | [l] : h2o + hs_deg24 --> acgam + hs_deg25                                  | 3.2.1.50  | Heparan sulfate degradation                | 4669.1                                                                                                                                         |
| GLCNACDASg   | GlcNAc N-deacetylase / N-sulfotransferase                                                        | [g] : (4) h2o + hs_pre9 + (4) paps --> (4) ac + (4) h + hs_pre10 + (4) pap |           | Chondroitin / heparan sulfate biosynthesis | ( 3340.1 or 8509.1 or 9348.1 or 64579.1 )                                                                                                      |
| GLCNACPT_L   | UDP-GlcNAc:diolichol-phosphate GlcNAc phosphotransferase (liver)                                 | [e] : (0.1) dolo_L + uacgam --> (0.1) naglc2p_L + ump                      | 2.7.8.15  | N-Glycan Biosynthesis                      | ( 1798.2 or 1798.1 )                                                                                                                           |
| GLCNACPT_U   | UDP-GlcNAc:diolichol-phosphate GlcNAc phosphotransferase (uterus)                                | [e] : (0.1) dolo_U + uacgam --> (0.1) naglc2p_U + ump                      | 2.7.8.15  | N-Glycan Biosynthesis                      | ( 1798.1 or 1798.2 )                                                                                                                           |
| GLCNACT_L    | UDP-GlcNAc:N-acetyl-D-glucosaminyl diphosphodolichol N-acetyl-D-glucosaminyltransferase (liver)  | [e] : (0.1) naglc2p_L + uacgam --> (0.1) chito2pdol_L + h + udp            | 2.4.1.141 | N-Glycan Biosynthesis                      |                                                                                                                                                |
| GLCNACT_U    | UDP-GlcNAc:N-acetyl-D-glucosaminyl diphosphodolichol N-acetyl-D-glucosaminyltransferase (uterus) | [e] : (0.1) naglc2p_U + uacgam --> (0.1) chito2pdol_U + h + udp            | 2.4.1.141 | N-Glycan Biosynthesis                      |                                                                                                                                                |
| GLCNACT1g    | alpha-N-acetylglucosaminyltransferase I, Golgi apparatus                                         | [g] : cs_hs_linkage + uacgam --> h + hs_pre1 + udp                         |           | Chondroitin / heparan sulfate biosynthesis | ( 2137.1 or 2135.1 )                                                                                                                           |
| GLCNACT2g    | alpha-N-acetylglucosaminyltransferase II                                                         | [g] : hs_pre2 + uacgam --> h + hs_pre3 + udp                               |           | Chondroitin / heparan sulfate biosynthesis | ( 2137.1 or 2134.1 or ( 2131.1 and 2132.1 ) or ( 2132.2 and 2131.1 ) )                                                                         |
| GLCNACT3g    | alpha-N-acetylglucosaminyltransferase II                                                         | [g] : hs_pre4 + uacgam --> h + hs_pre5 + udp                               |           | Chondroitin / heparan sulfate biosynthesis | ( 2137.1 or 2134.1 or ( 2131.1 and 2132.1 ) or ( 2132.2 and 2131.1 ) )                                                                         |
| GLCNACT4g    | alpha-N-acetylglucosaminyltransferase II                                                         | [g] : hs_pre6 + uacgam --> h + hs_pre7 + udp                               |           | Chondroitin / heparan sulfate biosynthesis | ( 2137.1 or 2134.1 or ( 2131.1 and 2132.1 ) or ( 2132.2 and 2131.1 ) )                                                                         |
| GLCNACT5g    | alpha-N-acetylglucosaminyltransferase II                                                         | [g] : hs_pre8 + uacgam --> h + hs_pre9 + udp                               |           | Chondroitin / heparan sulfate biosynthesis | ( 2137.1 or 2134.1 or ( 2131.1 and 2132.1 ) or ( 2132.2 and 2131.1 ) )                                                                         |
| GLC1r        | glucose transport (uniport)                                                                      | gle-D[e] <=> gle-D[c]                                                      |           | Transport, Extracellular                   | ( 155184.1 or 29988.1 or 56606.1 or 56606.2 or 81031.1 or 66035.1 or 154091.1 or 6514.1 or 6513.1 or 6515.1 or 6517.1 or 11182.1 or 144195.1 ) |
| GLC2_2       | D-glucose transport in via proton symport                                                        | gle-D[e] + (2) h[e] <=> gle-D[c] + (2) h[c]                                |           | Transport, Extracellular                   | 6523.1                                                                                                                                         |
| GLC2r        | D-glucose transport in via proton symport                                                        | gle-D[e] + h[e] <=> gle-D[c] + h[c]                                        |           | Transport, Extracellular                   | 6524.1                                                                                                                                         |
| GLC4         | glucose transport via sodium symport                                                             | gle-D[e] + na1[e] <=> gle-D[c] + na1[c]                                    |           | Transport, Extracellular                   | ( 159963.1 or 125206.1 or 6524.1 or 6526.1 or 200010.1 )                                                                                       |
| GLC4_2       | glucose transport via sodium symport                                                             | gle-D[e] + (2) na1[e] <=> gle-D[c] + (2) na1[c]                            |           | Transport, Extracellular                   | 6523.1                                                                                                                                         |
| GLCter       | glucose transport, endoplasmic reticulum                                                         | gle-D[e] <=> gle-D[r]                                                      |           | Transport, Endoplasmic Reticular           |                                                                                                                                                |
| GLCtg        | glucose transport, Golgi apparatus                                                               | gle-D[e] <=> gle-D[g]                                                      |           | Transport, Golgi Apparatus                 | 6513.1                                                                                                                                         |
| GLCly        | glucose efflux from lysosome                                                                     | gle-D[l] --> gle-D[c]                                                      |           | Transport, Lysosomal                       |                                                                                                                                                |
| GLCURter     | glucuronate endoplasmic reticular transport                                                      | glcur[c] --> glcur[r]                                                      |           | Transport, Endoplasmic Reticular           |                                                                                                                                                |
| GLCURly      | glucuronate transport into lysosome                                                              | glcur[c] + h[c] <=> glcur[l] + h[l]                                        |           | Transport, Lysosomal                       | 26503.1                                                                                                                                        |
| GLDBRAN      | glycogen debranching enzyme                                                                      | [e] : dxtrn + h2o --> gle-D + glygn3                                       | 3.2.1.33  | Starch and Sucrose Metabolism              | ( 178.1 or 178.2 or 178.3 or 178.5 or 178.6 or 178.4 )                                                                                         |
| GLGNS1       | glycogen synthase (ggn -> glygn1)                                                                | [e] : ggn + (3) udpg --> glygn1 + (3) h + (3) udp                          | 2.4.1.11  | Starch and Sucrose Metabolism              | ( ( 2998.1 and 2992.1 ) or ( 8908.1 and 2998.1 ) or ( 2992.1 and 2997.1 ) or ( 2997.1 and 8908.1 ) )                                           |

| Abbreviation | Reaction Name                                                        | Reaction                                                                    | E.C. #   | Pathway                                   | Gene association                                                                                                      |
|--------------|----------------------------------------------------------------------|-----------------------------------------------------------------------------|----------|-------------------------------------------|-----------------------------------------------------------------------------------------------------------------------|
| GLNALNaEx    | L-alanine/L-glutamine Na-dependent exchange (Gln-in)                 | ala-L[c] + gln-L[e] + na1[e] --> ala-L[e] + gln-L[c] + na1[c]               |          | Transport, Extracellular                  | 6510.1                                                                                                                |
| GLNASNaEx    | L-glutamine/L-asparagine Na-dependent exchange (Gln-L in)            | asn-L[c] + gln-L[e] + na1[e] --> asn-L[e] + gln-L[c] + na1[c]               |          | Transport, Extracellular                  | 6510.1                                                                                                                |
| GLNCYSNaEx   | L-cysteine/L-glutamine Na-dependent exchange (Gln-L in)              | cys-L[c] + gln-L[e] + na1[e] --> cys-L[e] + gln-L[c] + na1[c]               |          | Transport, Extracellular                  | 6510.1                                                                                                                |
| GLNLASEer    | gluconolactonase, endoplasmic reticulum                              | [r] : guln + h <=> gullac + h2o                                             | 3.1.1.17 | Ascorbate and Aldarate Metabolism         |                                                                                                                       |
| GLNS         | glutamine synthetase                                                 | [c] : atp + glu-L + nh4 --> adp + gln-L + h + pi                            | 6.3.1.2  | Glutamate metabolism                      | (2752.1 or 51557.1)                                                                                                   |
| GLNSERNaEx   | L-serine/L-glutamine Na-dependent exchange (Gln-L in)                | gln-L[e] + na1[e] + ser-L[c] --> gln-L[c] + na1[c] + ser-L[e]               |          | Transport, Extracellular                  | 6510.1                                                                                                                |
| GLN4         | L-glutamine reversible transport via sodium symport                  | gln-L[e] + na1[e] --> gln-L[c] + na1[c]                                     |          | Transport, Extracellular                  | (11254.1 or 55089.1 or 54407.1 or 81539.1)                                                                            |
| GLNTHRNaEx   | L-threonine/L-glutamine Na-dependent exchange (Gln-L in)             | gln-L[e] + na1[e] + thr-L[c] --> gln-L[c] + na1[c] + thr-L[e]               |          | Transport, Extracellular                  | 6510.1                                                                                                                |
| GLNtm        | L-glutamine transport via electroneutral transporter                 | gln-L[c] --> gln-L[m]                                                       |          | Transport, Mitochondrial                  |                                                                                                                       |
| GLNIN1       | Glutamine transport (Na, H coupled)                                  | gln-L[e] + h[c] + (2) na1[e] <=> gln-L[c] + h[c] + (2) na1[c]               |          | Transport, Extracellular                  | (92745.1 or 10991.1)                                                                                                  |
| GLPASE1      | glycogen phosphorylase (glygn2 -> dxtm)                              | [c] : glygn2 + (3) pi --> dxtm + (3) g1p                                    | 2.4.1.1  | Starch and Sucrose Metabolism             | (5834.1 or 5836.1 or 5837.1)                                                                                          |
| GLPASE2      | glycogen phosphorylase (amyls -> glc-D)                              | [c] : glygn3 + (7) h2o --> Tyr-ggn + (7) glc-D                              | 2.4.1.1  | Starch and Sucrose Metabolism             | (5836.1 or 5834.1 or 5837.1)                                                                                          |
| GLRASE       | glucuronolactone reductase                                           | [c] : gullac + nadp <=> glac + h + nadph                                    | 1.1.1.20 | Ascorbate and Aldarate Metabolism         |                                                                                                                       |
| GLU5Km       | glutamate 5-kinase (m)                                               | [m] : atp + glu-L --> adp + glu5p                                           | 2.7.2.11 | Urea cycle/amino group metabolism         | 5832.1                                                                                                                |
| GLUCYS       | gamma-glutamylcysteine synthetase                                    | [c] : atp + cys-L + glu-L --> adp + glucys + h + pi                         | 6.3.2.2  | Glutathione Metabolism                    | (2730.1 and 2729.1)                                                                                                   |
| GLUDC        | Glutamate Decarboxylase                                              | [c] : glu-L + h --> 4aub + co2                                              | 4.1.1.15 | Glutamate metabolism                      | (2571.1 or 2571.2 or 2572.1)                                                                                          |
| GLUDxm       | glutamate dehydrogenase (NAD) (mitochondrial)                        | [m] : glu-L + h2o + nad <=> agk + h + nadh + nh4                            | 1.4.1.2  | Glutamate metabolism                      | (2747.1 or 2746.1)                                                                                                    |
| GLUDym       | glutamate dehydrogenase (NADP), mitochondrial                        | [m] : glu-L + h2o + nadp <=> agk + h + nadph + nh4                          | 1.4.1.4  | Glutamate metabolism                      | (2747.1 or 2746.1)                                                                                                    |
| GluForTx     | Glutamate formimidoyltransferase                                     | [c] : forglu + h + thf --> 5forth + glu-L                                   | 2.1.2.5  | Histidine Metabolism                      | (10841.1 or 10841.2)                                                                                                  |
| GLUNm        | glutaminase (mitochondrial)                                          | [m] : gln-L + h2o --> glu-L + nh4                                           | 3.5.1.2  | Glutamate metabolism                      | (2744.1 or 27165.1 or 27165.2)                                                                                        |
| GLUPRT       | glutamine phosphoribosyltransferase                                  | [c] : gln-L + h2o + prpp --> glu-L + ppi + pram                             | 2.4.2.14 | IMP Biosynthesis                          | 5471.1                                                                                                                |
| GLU2m        | L-glutamate reversible transport via proton symport, mitochondrial   | glu-L[e] + h[c] <=> glu-L[m] + h[m]                                         |          | Transport, Mitochondrial                  | (8604.1 or 10165.1 or 79751.1 or 83733.1)                                                                             |
| GLU6         | Glutamate transport via Na, H symport and K antipor                  | glu-L[e] + h[c] + k[c] + (3) na1[e] --> glu-L[c] + h[c] + k[c] + (3) na1[c] |          | Transport, Extracellular                  | (6505.1 or 6506.1 or 6507.1 or 6511.1 or 6512.1)                                                                      |
| GLU7i        | Glutamate transport, lysosomal                                       | glu-L[l] --> glu-L[c]                                                       |          | Transport, Lysosomal                      |                                                                                                                       |
| GLUTCOADHm   | glutaryl-CoA dehydrogenase (mitochondria)                            | [m] : fad + glutcoa + h --> b2coa + co2 + fadh2                             | 1.3.99.7 | Tryptophan metabolism                     | (2639.1 or 2639.2)                                                                                                    |
| GLUur        | intracellular transport                                              | glu-L[c] <=> glu-L[r]                                                       |          | Transport, Endoplasmic Reticular          |                                                                                                                       |
| GLUVESSEC    | L-glutamate secretion via secretory vesicle (ATP driven)             | atp[c] + glu-L[c] + h2o[e] --> adp[c] + glu-L[e] + h[c] + pi[c]             |          | Transport, Extracellular                  | (57084.1 or 57030.1 or 246213.1)                                                                                      |
| GLXO1        | glyoxylate oxidase                                                   | [c] : glx + h2o + nad --> (2) h + nadh + oxa                                |          | Glyoxylate and Dicarboxylate Metabolism   | (160287.1 or 92483.1 or 55293.1 or 3948.1 or 3948.2 or 3939.1 or 3945.1 and 3939.1 or 3945.1 or 197257.1 or 197257.2) |
| GLXO2p       | glyoxylate oxidase, peroxisomal                                      | [x] : glx + h2o + o2 --> h + h2o2 + oxa                                     |          | Glyoxylate and Dicarboxylate Metabolism   | (54363.1 or 51179.1 or 51179.2)                                                                                       |
| GLXtm        | glyoxylate transport, mitochondrial                                  | glx[c] <=> glx[m]                                                           |          | Transport, Mitochondrial                  |                                                                                                                       |
| GLXtp        | glyoxylate transport, peroxisomal                                    | glx[c] <=> glx[x]                                                           |          | Transport, Peroxisomal                    |                                                                                                                       |
| GLYAMTRc     | glycine amidinotransferase (c)                                       | [c] : arg-L + gly <=> gudac + om                                            | 2.1.4.1  | Urea cycle/amino group metabolism         | 2628.1                                                                                                                |
| GLYATm       | glycine C-acetyltransferase                                          | [m] : accoa + gly <=> 2aobut + coa                                          | 2.3.1.29 | Glycine, Serine, and Threonine Metabolism | 23464.1                                                                                                               |
| GLYB4(2)r    | Betaine transport (sodium symport) (2:1)                             | glyb[e] + (2) na1[e] <=> glyb[c] + (2) na1[c]                               |          | Transport, Extracellular                  | 6539.1                                                                                                                |
| GLYBm        | Glycine betaine transport via diffusion (mitochondria to cytosol)    | glyb[m] <=> glyb[c]                                                         |          | Transport, Mitochondrial                  |                                                                                                                       |
| GLYC3Pm      | glycerol-3-phosphate shuttle                                         | glyc3p[c] --> glyc3p[m]                                                     |          | Transport, Mitochondrial                  |                                                                                                                       |
| GLYCK2       | glycerate kinase                                                     | [c] : atp + glyc-R --> 2pg + adp + h                                        | 2.7.1.31 | Glyoxylate and Dicarboxylate Metabolism   |                                                                                                                       |
| GLYCLTDy     | Glycolate dehydrogenase (NADP)                                       | [c] : glx + h + nadph --> glyclt + nadp                                     |          | Glyoxylate and Dicarboxylate Metabolism   | 9380.1                                                                                                                |
| GLYCLTDym    | Glycolate dehydrogenase (NADP), mitochondrial                        | [m] : glx + h + nadph --> glyclt + nadp                                     |          | Glyoxylate and Dicarboxylate Metabolism   |                                                                                                                       |
| GLYCLTip     | glycolate transport into peroxisome                                  | glyclh[c] --> glyclh[x]                                                     |          | Transport, Peroxisomal                    |                                                                                                                       |
| GLYC-St      | L-glycerate export                                                   | glyc-S[c] --> glyc-S[e]                                                     |          | Transport, Extracellular                  |                                                                                                                       |
| GLYct        | glycerol transport via channel                                       | glyc[c] <=> glyc[e]                                                         |          | Transport, Extracellular                  |                                                                                                                       |
| GLYctm       | glycerol transport                                                   | glyc[c] <=> glyc[m]                                                         |          | Transport, Mitochondrial                  |                                                                                                                       |
| GLYCTO1p     | Glycolate oxidase, peroxisome                                        | [x] : glyclt + o2 --> glx + h2o2                                            |          | Glyoxylate and Dicarboxylate Metabolism   | (51179.1 or 51179.2 or 54363.1)                                                                                       |
| GLYK         | glycerol kinase                                                      | [c] : atp + glyc --> adp + glyc3p + h                                       | 2.7.1.30 | Glycerophospholipid Metabolism            | (2712.1 or 2713.1 or 2710.1 or 2710.2)                                                                                |
| GLYKm        | glycerol kinase                                                      | [m] : atp + glyc --> adp + glyc3p + h                                       | 2.7.1.30 | Glycerophospholipid Metabolism            | (2712.1 or 2713.1 or 2710.1 or 2710.2)                                                                                |
| GLYOp        | glycine oxidase, peroxisomal                                         | [x] : gly + h2o + o2 --> glx + h2o2 + nh4                                   |          | Glycine, Serine, and Threonine Metabolism |                                                                                                                       |
| GLYOX        | hydroxyacylglutathione hydrolase                                     | [c] : h2o + lgt-S --> gthrd + h + lac-D                                     | 3.1.2.6  | Pyruvate Metabolism                       | (3029.1 or 84264.1 or 84264.2)                                                                                        |
| GLYOXm       | hydroxyacylglutathione hydrolase, mitochondrial                      | [m] : h2o + lgt-S --> gthrd + h + lac-D                                     | 3.1.2.6  | Pyruvate Metabolism                       | 3029.1                                                                                                                |
| GLY2r        | glycine reversible transport via proton symport                      | gly[e] + h[e] <=> gly[c] + h[c]                                             |          | Transport, Extracellular                  | 206358.1                                                                                                              |
| GLY2rl       | glycine reversible transport via proton symport (lysosome)           | gly[l] + h[l] <=> gly[c] + h[c]                                             |          | Transport, Lysosomal                      | 206358.1                                                                                                              |
| GLY4         | glycine transport via sodium symport                                 | gly[e] + na1[e] --> gly[c] + na1[c]                                         |          | Transport, Extracellular                  | (11254.1 or 55089.1 or 54407.1 or 81539.1)                                                                            |
| GLY7(211)r   | glycine reversible transport via sodium and chloride symport (2:1:1) | cl[e] + gly[e] + (2) na1[e] <=> cl[c] + gly[c] + (2) na1[c]                 |          | Transport, Extracellular                  | (6536.1 or 6536.2)                                                                                                    |
| GLY7(311)r   | glycine reversible transport via sodium and chloride symport (3:1:1) | cl[e] + gly[e] + (3) na1[e] <=> cl[c] + gly[c] + (3) na1[c]                 |          | Transport, Extracellular                  | 9152.1                                                                                                                |
| GLYtm        | glycine passive transport to mitochondria                            | gly[c] <=> gly[m]                                                           |          | Transport, Mitochondrial                  |                                                                                                                       |

| Abbreviation | Reaction Name                                                       | Reaction                                                             | E.C. #   | Pathway                                                | Gene association                                                                                                                                                 |
|--------------|---------------------------------------------------------------------|----------------------------------------------------------------------|----------|--------------------------------------------------------|------------------------------------------------------------------------------------------------------------------------------------------------------------------|
| GLYp         | glycine passive transport to peroxisome                             | gly[c] <=> gly[x]                                                    |          | Transport, Peroxisomal                                 |                                                                                                                                                                  |
| GLYVESSEC    | Glycine secretion via secretory vesicle (ATP driven)                | atp[c] + (3) gly[c] + h2o[c] -> adp[c] + (3) gly[e] + h[c] + pi[c]   |          | Transport, Extracellular                               | 140679.1                                                                                                                                                         |
| GMAND        | GDP-D-mannose dehydratase                                           | [c] : gdpmann -> gdpddman + h2o                                      | 4.2.1.47 | Fructose and Mannose Metabolism                        | 2762.1                                                                                                                                                           |
| GMPR         | GMP reductase                                                       | [c] : gmp + (2) h + nadph -> imp + nadp + nh4                        | 1.7.1.7  | Nucleotides                                            | ( 51292.1 or 51292.2 or 51292.3 or 2766.1 )                                                                                                                      |
| GMPS2        | GMP synthase                                                        | [c] : atp + glu-L + h2o + xmp -> amp + glu-L + gmp + (2) h + pp      | 6.3.5.2  | Nucleotides                                            | 8833.1                                                                                                                                                           |
| GMPn         | GMP nuclear transport                                               | gmp[c] <=> gmp[n]                                                    |          | Transport, Nuclear                                     |                                                                                                                                                                  |
| GND          | phosphogluconate dehydrogenase                                      | [c] : 6pgc + nadp -> co2 + nadph + ru5p-D                            | 1.1.1.44 | Pentose Phosphate Pathway                              | 5226.1                                                                                                                                                           |
| GNDer        | phosphogluconate dehydrogenase, endoplasmic reticulum               | [r] : 6pgc + nadp -> co2 + nadph + ru5p-D                            | 1.1.1.44 | Pentose Phosphate Pathway                              |                                                                                                                                                                  |
| GNMT         | glycine N-methyltransferase                                         | [c] : amet + gly -> ahcys + h + sarcs                                | 2.1.1.20 | Glycine, Serine, and Threonine Metabolism              | 27232.1                                                                                                                                                          |
| GPICALPHAt   | gp1alpha_hs transport                                               | gp1alpha_hs[c] <=> gp1alpha_hs[e]                                    |          | Transport, Extracellular                               |                                                                                                                                                                  |
| GPICALPHAtg  | gp1alpha_hs intracellular transport                                 | gp1alpha_hs[c] <=> gp1alpha_hs[g]                                    |          | Transport, Golgi Apparatus                             |                                                                                                                                                                  |
| GPICte       | gp1c_hs transport                                                   | gp1c_hs[c] <=> gp1c_hs[e]                                            |          | Transport, Extracellular                               |                                                                                                                                                                  |
| GPICtg       | gp1c_hs intracellular transport                                     | gp1c_hs[c] <=> gp1c_hs[g]                                            |          | Transport, Golgi Apparatus                             |                                                                                                                                                                  |
| GPAM_hs      | glycerol-3-phosphate acyltransferase                                | [c] : Rtotalcoa + gly3p -> alpa_hs + coa                             | 2.3.1.15 | Triacylglycerol Synthesis                              | 57678.1                                                                                                                                                          |
| GPAMm_hs     | glycerol-3-phosphate acyltransferase                                | [m] : Rtotalcoa + gly3p -> alpa_hs + coa                             | 2.3.1.15 | Triacylglycerol Synthesis                              | 57678.1                                                                                                                                                          |
| GPDDA1       | Glycerophosphodiester phosphodiesterase (Glycerophosphocholine)     | [c] : g3pc + h2o -> chol + gly3p + h                                 | 3.1.4.46 | Glycerophospholipid Metabolism                         |                                                                                                                                                                  |
| GPIAT        | glucosaminylphosphatidyl inositol acetyltransferase                 | [c] : gpaui_hs + pmntoa -> coa + gacpaui_hs                          |          | Glycosylphosphatidylinositol (GPI)-anchor biosynthesis | 284098.1                                                                                                                                                         |
| GPIDA2er     | glycosylphosphatidylinositol (GPI) deacylase, endoplasmic reticulum | [r] : em2emgacpaui_prot_hs + h2o -> dem2emgacpaui_prot_hs + h + hdca |          | Glycosylphosphatidylinositol (GPI)-anchor biosynthesis | 80055.1                                                                                                                                                          |
| GPIDAer      | glycosylphosphatidylinositol (GPI) deacylase, endoplasmic reticulum | [r] : gpi_prot_hs + h2o -> dgpi_prot_hs + h + hdca                   |          | Glycosylphosphatidylinositol (GPI)-anchor biosynthesis | 80055.1                                                                                                                                                          |
| GPIMTer_L    | GlN-acylPI mannosyltransferase, endoplasmic reticulum               | [r] : (0.1) dolmanp_L + gacpaui_hs -> (0.1) dolp_L + h + mgacpaui_hs |          | Glycosylphosphatidylinositol (GPI)-anchor biosynthesis | ( 54965.1 and 93183.1 )                                                                                                                                          |
| GPIMTer_U    | GlN-acylPI mannosyltransferase, endoplasmic reticulum               | [r] : (0.1) dolmanp_U + gacpaui_hs -> (0.1) dolp_U + h + mgacpaui_hs |          | Glycosylphosphatidylinositol (GPI)-anchor biosynthesis | ( 93183.1 and 54965.1 )                                                                                                                                          |
| GQ1BALPHAt   | gq1balpha_hs transport                                              | gq1balpha_hs[c] <=> gq1balpha_hs[e]                                  |          | Transport, Extracellular                               |                                                                                                                                                                  |
| GQ1BALPHAtg  | gq1balpha_hs intracellular transport                                | gq1balpha_hs[c] <=> gq1balpha_hs[g]                                  |          | Transport, Golgi Apparatus                             |                                                                                                                                                                  |
| GQ1Bte       | gq1b_hs transport                                                   | gq1b_hs[c] <=> gq1b_hs[e]                                            |          | Transport, Extracellular                               |                                                                                                                                                                  |
| GQ1Btg       | gq1b_hs intracellular transport                                     | gq1b_hs[c] <=> gq1b_hs[g]                                            |          | Transport, Golgi Apparatus                             |                                                                                                                                                                  |
| GRTT         | geranyltransferase                                                  | [c] : grdp + ipdp -> frdp + ppi                                      | 2.5.1.10 | Cholesterol Metabolism                                 | 9453.1                                                                                                                                                           |
| GRTTx        | geranyltransferase                                                  | [x] : grdp + ipdp -> frdp + ppi                                      | 2.5.1.10 | Cholesterol Metabolism                                 | 2224.1                                                                                                                                                           |
| GSNKm        | guanosine kinase (mitochondrial)                                    | [m] : atp + gsn -> adp + gmp + h                                     |          | Nucleotides                                            |                                                                                                                                                                  |
| GSN          | guanosine facilitated transport in cytosol                          | gsn[e] <=> gsn[c]                                                    |          | Transport, Extracellular                               | ( 3177.1 or 2030.1 )                                                                                                                                             |
| GSN4         | guanosine transport in via sodium symport                           | gsn[e] + na1[e] -> gsn[c] + na1[c]                                   |          | Transport, Extracellular                               | ( 9153.1 or 64078.1 )                                                                                                                                            |
| GSN5         | guanosine transport in via sodium (1:2) symport                     | gsn[e] + (2) na1[e] -> gsn[c] + (2) na1[c]                           |          | Transport, Extracellular                               | 64078.1                                                                                                                                                          |
| GSNl         | guanosine facilitated transport from lysosome                       | gsn[l] <=> gsn[c]                                                    |          | Transport, Lysosomal                                   | 55315.1                                                                                                                                                          |
| GSNm         | guanosine facilitated transport in mitochondria                     | gsn[c] <=> gsn[m]                                                    |          | Transport, Mitochondrial                               | 2030.1                                                                                                                                                           |
| GTIAte       | gt1a_hs transport                                                   | gt1a_hs[c] <=> gt1a_hs[e]                                            |          | Transport, Extracellular                               |                                                                                                                                                                  |
| GTIAtg       | gt1a_hs intracellular transport                                     | gt1a_hs[c] <=> gt1a_hs[g]                                            |          | Transport, Golgi Apparatus                             |                                                                                                                                                                  |
| GTHDH        | Glutathione dehydrogenase (dehydroascorbate reductase)              | [c] : dhdascb + (2) gthrd -> ascb-L + gthox                          | 1.8.5.1  | Ascorbate and Aldarate Metabolism                      |                                                                                                                                                                  |
| GTHO         | glutathione oxidoreductase                                          | [c] : gthox + h + nadph -> (2) gthrd + nadp                          | 1.8.1.7  | Glutamate metabolism                                   | 2936.1                                                                                                                                                           |
| GTHOm        | glutathione oxidoreductase                                          | [m] : gthox + h + nadph -> (2) gthrd + nadp                          | 1.8.1.7  | Glutamate metabolism                                   | 2936.1                                                                                                                                                           |
| GTHP         | glutathione peroxidase                                              | [c] : (2) gthrd + h2o2 <=> gthox + (2) h2o                           | 1.11.1.9 | Glutathione Metabolism                                 | ( 5052.1 or 5052.2 or 5052.3 or 7001.1 or 7001.2 or 7001.3 or 2877.1 or 2876.1 or 2876.2 or 2879.1 )                                                             |
| GTHPe        | glutathione peroxidase (e)                                          | [e] : (2) gthrd + h2o2 <=> gthox + (2) h2o                           | 1.11.1.9 | Glutathione Metabolism                                 | ( 2878.1 or 257202.1 )                                                                                                                                           |
| GTHPm        | glutathione peroxidase, mitochondria                                | [m] : (2) gthrd + h2o2 <=> gthox + (2) h2o                           | 1.11.1.9 | Glutathione Metabolism                                 | ( 10935.1 or 10935.2 or 2879.1 )                                                                                                                                 |
| GTHRDt       | Glutathione transport into mitochondria                             | atp[c] + gthrd[c] + h2o[c] <=> adp[c] + gthrd[m] + h[c] + pi[c]      |          | Glutathione Metabolism                                 |                                                                                                                                                                  |
| GTHRDtr      | glutathione transport via diffusion                                 | gthrd[c] <=> gthrd[r]                                                |          | Transport, Endoplasmic Reticular                       |                                                                                                                                                                  |
| GTHS         | glutathione synthetase                                              | [c] : atp + glucys + gly -> adp + gthrd + h + pi                     | 6.3.2.3  | Glutathione Metabolism                                 | 2937.1                                                                                                                                                           |
| GTMLTe       | g-glutamyltransferase (e)                                           | ala-L[c] + gthrd[c] -> cglh[c] + gluala[e]                           | 2.3.2.2  | Glutathione Metabolism                                 | ( 2678.1 or 2678.2 or 2678.3 or 2679.1 )                                                                                                                         |
| GTPCI        | GTP cyclohydrolase I                                                | [c] : gtp + h2o -> ahdt + for + h                                    | 3.5.4.16 | Tetrahydrobiopterin                                    | 2643.1                                                                                                                                                           |
| GTPCIn       | GTP cyclohydrolase I, nuclear                                       | [n] : gtp + h2o -> ahdt + for + h                                    | 3.5.4.16 | Tetrahydrobiopterin                                    | 2643.1                                                                                                                                                           |
| GTPn         | GTP diffusion in nucleus                                            | gtp[c] <=> gtp[n]                                                    |          | Transport, Nuclear                                     |                                                                                                                                                                  |
| GUACYC       | guanylate cyclase                                                   | [c] : gtp -> 35cgmpp + ppi                                           | 4.6.1.2  | Nucleotides                                            | ( 4881.1 or 4882.1 or 4882.2 or ( 2974.1 and 2977.1 ) or ( 2983.1 and 2982.1 ) or ( 2977.1 and 2983.1 ) or ( 2982.1 and 2974.1 ) or 2984.1 or 2986.1 or 3000.1 ) |
| GUAD         | guanine deaminase                                                   | [c] : gua + h + h2o -> nh4 + xan                                     | 3.5.4.3  | Purine Catabolism                                      | 9615.1                                                                                                                                                           |
| GUAPRT       | guanine phosphoribosyltransferase                                   | [c] : gua + prpp -> gmp + ppi                                        | 2.4.2.8  | Salvage Pathway                                        | 3251.1                                                                                                                                                           |
| GUA          | Guanine transport                                                   | gua[e] <=> gua[c]                                                    |          | Transport, Extracellular                               | 3177.1                                                                                                                                                           |
| GULLACter    | gulonolactone endoplasmic reticular transport                       | gullac[c] -> gullac[r]                                               |          | Transport, Endoplasmic Reticular                       |                                                                                                                                                                  |
| GULN3D       | L-gulonate 3-dehydrogenase                                          | [c] : gulin + nad <=> 3dhgulin + h + nadh                            | 1.1.1.45 | Pentose and Glucuronate Interconversions               |                                                                                                                                                                  |
| GULNDer      | gulonate dehydrogenase, endoplasmic reticulum                       | [r] : gklur + h + nadph <=> gulin + nadp                             | 1.1.1.19 | Pentose and Glucuronate Interconversions               |                                                                                                                                                                  |
| GULNter      | L-gulonate endoplasmic reticular export                             | gulin[r] -> gulin[c]                                                 |          | Transport, Endoplasmic Reticular                       |                                                                                                                                                                  |
| GUR1PP       | Glucuronate 1-phosphate phosphatase                                 | [c] : gklur1p + h2o -> gklur + pi                                    |          | Pentose and Glucuronate Interconversions               |                                                                                                                                                                  |
| H2CO3D       | carboxylic acid dissociation                                        | [c] : co2 + h2o <=> h2co3                                            | 4.2.1.1  | Miscellaneous                                          | ( 771.2 or 23632.1 or 377677.1 or 759.1 or 760.1 or 761.1 or 762.1 or 766.1 or 766.2 or 768.1 or 771.1 )                                                         |
| H2CO3D2      | carboxylic acid dissociation                                        | [c] : h + hco3 <=> h2co3                                             |          | Miscellaneous                                          |                                                                                                                                                                  |

| Abbreviation | Reaction Name                                                            | Reaction                                                                       | E.C. #    | Pathway                                                | Gene association                                                                                         |
|--------------|--------------------------------------------------------------------------|--------------------------------------------------------------------------------|-----------|--------------------------------------------------------|----------------------------------------------------------------------------------------------------------|
| H2CO3D2m     | carboxylic acid dissociation, mitochondrial                              | [m] : h + hco3 <=> h2co3                                                       |           | Miscellaneous                                          |                                                                                                          |
| H2CO3Dm      | carboxylic acid dissociation                                             | [m] : co2 + h2o <=> h2co3                                                      | 4.2.1.1   | Miscellaneous                                          | ( 763.1 or 11238.1 )                                                                                     |
| H2ETer       | H2 phosphoethanolaminy transferase, endoplasmic reticulum                | [r] : mgacpail_hs + pe_hs -> dag_hs + emgacpail_hs                             |           | Glycosylphosphatidylinositol (GPI)-anchor biosynthesis | ( 23556.1 or 23556.2 )                                                                                   |
| H2MTER_L     | H2 mannosyltransferase, endoplasmic reticulum                            | [r] : (0.1) dolmanp_L + mgacpail_hs -> (0.1) dolp_L + h + m2gacpail_hs         |           | Glycosylphosphatidylinositol (GPI)-anchor biosynthesis | 55650.1                                                                                                  |
| H2MTER_U     | H2 mannosyltransferase, endoplasmic reticulum                            | [r] : (0.1) dolmanp_U + mgacpail_hs -> (0.1) dolp_U + h + m2gacpail_hs         |           | Glycosylphosphatidylinositol (GPI)-anchor biosynthesis | 55650.1                                                                                                  |
| H2O2syn      | Hydrogen peroxide synthesis (NADPH dependent)                            | [c] : h + nadph + o2 -> h2o2 + nadp                                            |           | Tyrosine metabolism                                    | ( 53905.1 or 53905.2 or 50506.1 )                                                                        |
| H2O2t        | hydrogen peroxide transport via diffusion                                | h2o2[e] <=> h2o2[c]                                                            |           | Transport, Extracellular                               |                                                                                                          |
| H2O2tly      | hydrogen peroxide lysosomal transport via diffusion                      | h2o2[c] <=> h2o2[l]                                                            |           | Transport, Lysosomal                                   |                                                                                                          |
| H2O2tm       | hydrogen peroxide mitochondrial transport                                | h2o2[c] <=> h2o2[m]                                                            |           | Transport, Mitochondrial                               |                                                                                                          |
| H2O2tn       | hydrogen peroxide nuclear transport                                      | h2o2[c] <=> h2o2[n]                                                            |           | Transport, Nuclear                                     |                                                                                                          |
| H2O2tp       | hydrogen peroxide peroxisomal transport via diffusion                    | h2o2[c] <=> h2o2[x]                                                            |           | Transport, Peroxisomal                                 |                                                                                                          |
| H2Oe         | H2O transport via diffusion                                              | h2o[e] <=> h2o[c]                                                              |           | Transport, Extracellular                               | 6523.1                                                                                                   |
| H2Oer        | H2O endoplasmic reticulum transport                                      | h2o[c] <=> h2o[r]                                                              |           | Transport, Endoplasmic Reticular                       |                                                                                                          |
| H2Og         | H2O transport, Golgi apparatus                                           | h2o[c] <=> h2o[g]                                                              |           | Transport, Golgi Apparatus                             |                                                                                                          |
| H2Oly        | H2O transport, lysosomal                                                 | h2o[c] <=> h2o[l]                                                              |           | Transport, Lysosomal                                   |                                                                                                          |
| H2Om         | H2O transport, mitochondrial                                             | h2o[c] <=> h2o[m]                                                              |           | Transport, Mitochondrial                               | 343.1                                                                                                    |
| H2On         | H2O transport, nuclear                                                   | h2o[n] <=> h2o[c]                                                              |           | Transport, Nuclear                                     |                                                                                                          |
| H2Op         | H2O transport, peroxisomal                                               | h2o[c] <=> h2o[x]                                                              |           | Transport, Peroxisomal                                 |                                                                                                          |
| H3ETer       | H3 phosphoethanolaminy transferase, endoplasmic reticulum                | [r] : m2gacpail_hs + pe_hs -> dag_hs + memgacpail_hs                           |           | Glycosylphosphatidylinositol (GPI)-anchor biosynthesis | ( 23556.1 or 23556.2 )                                                                                   |
| H3MTER_L     | H3 mannosyltransferase, endoplasmic reticulum                            | [r] : (0.1) dolmanp_L + m2gacpail_hs -> (0.1) dolp_L + h + m3gacpail_hs        |           | Glycosylphosphatidylinositol (GPI)-anchor biosynthesis | 9488.1                                                                                                   |
| H3MTER_U     | H3 mannosyltransferase, endoplasmic reticulum                            | [r] : (0.1) dolmanp_U + m2gacpail_hs -> (0.1) dolp_U + h + m3gacpail_hs        |           | Glycosylphosphatidylinositol (GPI)-anchor biosynthesis | 9488.1                                                                                                   |
| H4ET3er      | H4 phosphoethanolaminy transferase, endoplasmic reticulum                | [r] : m3gacpail_hs + pe_hs -> dag_hs + em3gacpail_hs                           |           | Glycosylphosphatidylinositol (GPI)-anchor biosynthesis | ( ( 5281.2 and 84720.1 ) or ( 5281.2 and 84720.2 ) or ( 5281.1 and 84720.1 ) or ( 5281.1 and 84720.2 ) ) |
| H4ETer       | H4 phosphoethanolaminy transferase, endoplasmic reticulum                | [r] : m3gacpail_hs + pe_hs -> dag_hs + m2emgacpail_hs                          |           | Glycosylphosphatidylinositol (GPI)-anchor biosynthesis | ( 23556.1 or 23556.2 )                                                                                   |
| H5MTER_L     | H5 mannosyltransferase, endoplasmic reticulum                            | [r] : (0.1) dolmanp_L + emgacpail_hs -> (0.1) dolp_L + h + memgacpail_hs       |           | Glycosylphosphatidylinositol (GPI)-anchor biosynthesis | 55650.1                                                                                                  |
| H5MTER_U     | H5 mannosyltransferase, endoplasmic reticulum                            | [r] : (0.1) dolmanp_U + emgacpail_hs -> (0.1) dolp_U + h + memgacpail_hs       |           | Glycosylphosphatidylinositol (GPI)-anchor biosynthesis | 55650.1                                                                                                  |
| H6ET2er      | H6 phosphoethanolaminy transferase, endoplasmic reticulum                | [r] : em3gacpail_hs + pe_hs -> dag_hs + emem2gacpail_hs                        |           | Glycosylphosphatidylinositol (GPI)-anchor biosynthesis | ( ( 5281.1 and 54872.1 ) or ( 54872.1 and 5281.2 ) )                                                     |
| H6ET3er      | H6 phosphoethanolaminy transferase, endoplasmic reticulum                | [r] : m2emgacpail_hs + pe_hs -> dag_hs + em2emgacpail_hs                       |           | Glycosylphosphatidylinositol (GPI)-anchor biosynthesis | ( ( 5281.2 and 84720.1 ) or ( 5281.2 and 84720.2 ) or ( 5281.1 and 84720.1 ) or ( 5281.1 and 84720.2 ) ) |
| H6ETer       | H6 phosphoethanolaminy transferase, endoplasmic reticulum                | [r] : em3gacpail_hs + pe_hs -> dag_hs + em2emgacpail_hs                        |           | Glycosylphosphatidylinositol (GPI)-anchor biosynthesis | ( 23556.1 or 23556.2 )                                                                                   |
| H6MTER_L     | H6 mannosyltransferase, endoplasmic reticulum                            | [r] : (0.1) dolmanp_L + m2emgacpail_hs -> (0.1) dolp_L + h + m3emgacpail_hs    |           | Glycosylphosphatidylinositol (GPI)-anchor biosynthesis | 80235.1                                                                                                  |
| H6MTER_U     | H6 mannosyltransferase, endoplasmic reticulum                            | [r] : (0.1) dolmanp_U + m2emgacpail_hs -> (0.1) dolp_U + h + m3emgacpail_hs    |           | Glycosylphosphatidylinositol (GPI)-anchor biosynthesis | 80235.1                                                                                                  |
| H7ET2er      | H7 phosphoethanolaminy transferase, endoplasmic reticulum                | [r] : em2emgacpail_hs + pe_hs -> dag_hs + gpi_hs                               |           | Glycosylphosphatidylinositol (GPI)-anchor biosynthesis | ( ( 5281.1 and 54872.1 ) or ( 54872.1 and 5281.2 ) )                                                     |
| H7ETer       | H7 phosphoethanolaminy transferase, endoplasmic reticulum                | [r] : emem2gacpail_hs + pe_hs -> dag_hs + gpi_hs                               |           | Glycosylphosphatidylinositol (GPI)-anchor biosynthesis | ( 23556.1 or 23556.2 )                                                                                   |
| H7MTER_L     | H7 mannosyltransferase, endoplasmic reticulum                            | [r] : (0.1) dolmanp_L + em2emgacpail_hs -> (0.1) dolp_L + h + mem2emgacpail_hs |           | Glycosylphosphatidylinositol (GPI)-anchor biosynthesis | 80235.1                                                                                                  |
| H7MTER_U     | H7 mannosyltransferase, endoplasmic reticulum                            | [r] : (0.1) dolmanp_U + em2emgacpail_hs -> (0.1) dolp_U + h + mem2emgacpail_hs |           | Glycosylphosphatidylinositol (GPI)-anchor biosynthesis | 80235.1                                                                                                  |
| H7TAer       | H7 transamidase, endoplasmic reticulum                                   | [r] : em2emgacpail_hs + pre_prot -> em2emgacpail_prot_hs + gpi_sig             |           | Glycosylphosphatidylinositol (GPI)-anchor biosynthesis | ( 94005.1 and 10026.1 and 128869.1 and 8733.1 and 51604.1 )                                              |
| H8MTER_L     | H8 mannosyltransferase, endoplasmic reticulum                            | [r] : (0.1) dolmanp_L + gpi_hs -> (0.1) dolp_L + h + m(em)3gacpail_hs          |           | Glycosylphosphatidylinositol (GPI)-anchor biosynthesis | 80235.1                                                                                                  |
| H8MTER_U     | H8 mannosyltransferase, endoplasmic reticulum                            | [r] : (0.1) dolmanp_U + gpi_hs -> (0.1) dolp_U + h + m(em)3gacpail_hs          |           | Glycosylphosphatidylinositol (GPI)-anchor biosynthesis | 80235.1                                                                                                  |
| H8TAer       | H8 transamidase, endoplasmic reticulum                                   | [r] : gpi_hs + pre_prot -> gpi_prot_hs + gpi_sig                               |           | Glycosylphosphatidylinositol (GPI)-anchor biosynthesis | ( 94005.1 and 8733.1 and 10026.1 and 51604.1 and 128869.1 )                                              |
| HACD1m       | 3-hydroxyacyl-CoA dehydrogenase (acetoacetyl-CoA) (mitochondria)         | [m] : aacoa + h + nadh <=> 3hbcoa + nad                                        | 1.1.1.35  | Tryptophan metabolism                                  | ( 3028.1 or ( 3032.1 and 3030.1 ) or 3033.1 )                                                            |
| HACD1x       | 3-hydroxyacyl-CoA dehydrogenase (acetoacetyl-CoA) (peroxisome)           | [x] : aacoa + h + nadh <=> 3hbcoa + nad                                        | 1.1.1.35  | Tryptophan metabolism                                  | ( 1962.1 or 3295.1 )                                                                                     |
| HACD9m       | 3-hydroxyacyl-CoA dehydrogenase (2-Methylacetoacetyl-CoA), mitochondrial | [m] : 3hmbcoa + nad <=> 2maacoa + h + nadh                                     | 1.1.1.35  | Valine, Leucine, and Isoleucine Metabolism             | 3028.1                                                                                                   |
| HAS1         | hyaluronan synthase                                                      | uacgam[c] + udpglucr[c] -> (2) h[c] + ha_pre1[e] + (2) udp[c]                  | 2.4.1.212 | Hyaluronan Metabolism                                  | ( 3036.1 or 3037.1 or 3038.1 or 3038.2 )                                                                 |
| HAS2         | hyaluronan synthase                                                      | ha_pre1[e] + uacgam[c] + udpglucr[c] -> (2) h[c] + ha[e] + (2) udp[c]          | 2.4.1.212 | Hyaluronan Metabolism                                  | ( 3036.1 or 3037.1 or 3038.1 or 3038.2 )                                                                 |
| HAty         | hyaluronan transport, extracellular to lysosome                          | ha[e] -> ha[l]                                                                 |           | Transport, Lysosomal                                   |                                                                                                          |
| HBZOPT10m    | Hydroxybenzoate Decaprenyltransferase                                    | [m] : 4hbz + decdp -> 3dphb + ppi                                              |           | Ubiquinone Biosynthesis                                | 27235.1                                                                                                  |
| HCO3_CLi     | bicarbonate transport (Cl-/HCO3- exchange)                               | cl[c] + hco3[e] <=> cl[e] + hco3[c]                                            |           | Transport, Extracellular                               | ( 83697.1 or 6508.2 or 6521.1 or 6522.1 or 6508.1 )                                                      |
| HCO3_NAt     | bicarbonate transport (Na+/HCO3 cotransport)                             | hco3[e] + na1[e] <=> hco3[c] + na1[c]                                          |           | Transport, Extracellular                               | 9497.1                                                                                                   |

| Abbreviation  | Reaction Name                                                  | Reaction                                                                                    | E.C. #    | Pathway                                    | Gene association                                                                                                |
|---------------|----------------------------------------------------------------|---------------------------------------------------------------------------------------------|-----------|--------------------------------------------|-----------------------------------------------------------------------------------------------------------------|
| HCO3Em        | HCO3 equilibrium reaction                                      | [m] : co2 + h2o <=> h + hco3                                                                |           | Urea cycle/amino group metabolism          |                                                                                                                 |
| HCouMARINte   | xenobiotic transport                                           | hcoumarin[e] <=> hcoumarin[c]                                                               |           | Transport, Extracellular                   |                                                                                                                 |
| HDCAter       | palmitate ER export                                            | hdca[r] --> hdca[c]                                                                         |           | Transport, Endoplasmic Reticular           |                                                                                                                 |
| HDCAtr        | fatty acid transport via diffusion                             | hdca[e] <=> hdca[c]                                                                         |           | Transport, Extracellular                   |                                                                                                                 |
| HDCEAtr       | fatty acid transport via diffusion                             | hdcea[e] <=> hdcea[c]                                                                       |           | Transport, Extracellular                   |                                                                                                                 |
| HDD2COAix     | hdd2coa intracellular transport                                | hdd2coa[e] <=> hdd2coa[x]                                                                   |           | Transport, Peroxisomal                     |                                                                                                                 |
| HESTRATRIOLte | hydroxylated estrogen derivative transport                     | hestratriol[c] <=> hestratriol[e]                                                           |           | Transport, Extracellular                   |                                                                                                                 |
| HESTRATRIOLr  | hydroxylated estrogen derivative transport                     | hestratriol[c] <=> hestratriol[r]                                                           |           | Transport, Endoplasmic Reticular           |                                                                                                                 |
| HEX1          | hexokinase (D-glucose:ATP)                                     | [c] : atp + glc-D --> adp + g6p + h                                                         | 2.7.1.1   | Glycolysis/Gluconeogenesis                 | ( 2645.1 or 2645.2 or 2645.3 or 3098.1 or 3098.2 or 3098.3 or 3098.4 or 3098.5 or 3099.1 or 3101.1 or 80201.1 ) |
| HEX10         | hexokinase (D-glucosamine:ATP)                                 | [c] : atp + gam --> adp + gam6p + h                                                         | 2.7.1.1   | Aminosugar Metabolism                      | ( 3098.1 or 3098.2 or 3098.3 or 3098.4 or 3098.5 or 2645.1 or 2645.2 or 2645.3 or 80201.1 or 3101.1 or 3099.1 ) |
| HEX4          | hexokinase (D-mannose:ATP)                                     | [c] : atp + man --> adp + h + man6p                                                         | 2.7.1.7   | Fructose and Mannose Metabolism            | ( 2645.1 or 3098.2 or 2645.3 or 3098.5 or 3098.2 or 80201.1 or 2645.2 or 3099.1 or 3098.3 or 3101.1 or 3098.1 ) |
| HEX7          | hexokinase (D-fructose:ATP)                                    | [c] : atp + fru --> adp + f6p + h                                                           | 2.7.1.1   | Fructose and Mannose Metabolism            | ( 2645.1 or 2645.2 or 3098.1 or 3098.2 or 3098.3 or 3098.4 or 3098.5 or 3099.1 or 3101.1 or 80201.1 or 2645.3 ) |
| HEXCCOAtx     | fatty acid intracellular transport                             | hexcco[a] <=> hexcco[x]                                                                     |           | Transport, Peroxisomal                     |                                                                                                                 |
| HEXCCPT1      | carnitine O-palmitoyltransferase                               | [c] : crn + hexcco --> coa + hexccrn                                                        | 2.3.1.21  | Carnitine shuttle                          | ( 1375.4 or 1374.1 or 126129.1 or 1375.3 or 1375.2 or 1375.1 )                                                  |
| HEXCCPT2      | carnitine transferase                                          | [m] : coa + hexccrn --> crn + hexcco                                                        |           | Carnitine shuttle                          | 1376.1                                                                                                          |
| HEXCCRNt      | transport into the mitochondria (carnitine)                    | hexccrn[c] --> hexccrn[m]                                                                   |           | Carnitine shuttle                          | 788.1                                                                                                           |
| HEXCt         | fatty acid transport via diffusion                             | hexc[e] <=> hexc[c]                                                                         |           | Transport, Extracellular                   |                                                                                                                 |
| HGNTOR        | Homogentisate: oxygen 1,2-oxidoreductase (decyclizing)         | [c] : hgentis + o2 --> 4mlacac + h                                                          | 1.13.11.5 | Tyrosine metabolism                        | 3081.1                                                                                                          |
| HIBDm         | 3-hydroxyisobutyrate dehydrogenase, mitochondrial              | [m] : 3hmp + nad <=> 2mp + h + nadh                                                         | 1.1.1.31  | Valine, Leucine, and Isoleucine Metabolism | 11112.1                                                                                                         |
| HISD          | histidase                                                      | [c] : his-L --> nh4 + urcan                                                                 | 4.3.1.3   | Histidine Metabolism                       | 3034.1                                                                                                          |
| HISDC         | histidine decarboxylase                                        | [c] : h + his-L --> co2 + hista                                                             | 4.1.1.22  | Histidine Metabolism                       | ( 1644.1 or 3067.1 )                                                                                            |
| HIS4          | L-histidine transport in via sodium symport                    | his-L[e] + na[e] --> his-L[c] + na[e]                                                       |           | Transport, Extracellular                   | ( 11254.1 or 54407.1 )                                                                                          |
| HISTASE       | Histaminase                                                    | [c] : h2o + hista + o2 --> h2o2 + im4act + nh4                                              | 1.4.3.6   | Histidine Metabolism                       | ( 26.1 or 314.2 or 314.1 )                                                                                      |
| HISTAu        | Histamine uniport                                              | hista[c] <=> hista[e]                                                                       |           | Transport, Extracellular                   | ( 6582.1 or 6582.2 or 6581.1 )                                                                                  |
| HISTAVESSEC   | Histamine secretion via secretory vesicle (ATP driven)         | (2) atp[c] + (2) h2o[c] + (3) hista[c] --> (2) adp[c] + (2) h[c] + (3) hista[e] + (2) pi[c] |           | Transport, Extracellular                   | ( 6570.1 or 6571.1 )                                                                                            |
| HISiDF        | L-histidine transport via diffusion (extracellular to cytosol) | his-L[e] --> his-L[c]                                                                       |           | Transport, Extracellular                   | 55089.1                                                                                                         |
| HISn1         | Histidine transport (Na, H coupled)                            | h[c] + his-L[e] + (2) na[e] <=> h[e] + his-L[c] + (2) na[e]                                 |           | Transport, Extracellular                   | 10991.1                                                                                                         |
| HKt           | H+/K+ gastric/non-gastric P-ATPase and ABC ATPase              | atp[c] + h2o[c] + k[e] --> adp[c] + h[e] + k[c] + pi[c]                                     | 3.6.3.10  | Transport, Extracellular                   | ( 496.1 and 495.1 )                                                                                             |
| HKYNH         | 3-Hydroxy-L-tryptophan hydroxylase                             | [c] : h2o + hLkynr --> 3anthm + ala-L                                                       | 3.7.1.3   | Tryptophan metabolism                      | 8942.1                                                                                                          |
| HMBS          | hydroxymethylbilane synthase                                   | [c] : h2o + (4) ppbg --> hmbil + (4) nh4                                                    | 4.3.1.8   | Heme Biosynthesis                          | 3145.1                                                                                                          |
| HMGCOAr       | Hydroxymethylglutaryl CoA reductase (ir)                       | [r] : (2) h + hmgscoa + (2) nadph --> coa + mev-R + (2) nadp                                | 1.1.1.34  | Cholesterol Metabolism                     | 3156.1                                                                                                          |
| HMGCOArx      | Hydroxymethylglutaryl CoA reductase (ir)                       | [x] : (2) h + hmgscoa + (2) nadph --> coa + mev-R + (2) nadp                                | 1.1.1.34  | Cholesterol Metabolism                     | 3156.1                                                                                                          |
| HMGCOAsi      | Hydroxymethylglutaryl CoA synthase (ir)                        | [c] : aaccoa + aaccoa + h2o --> coa + h + hmgscoa                                           | 4.1.3.5   | Cholesterol Metabolism                     | ( 3157.2 or 3157.1 )                                                                                            |
| HMGCOAsim     | Hydroxymethylglutaryl CoA synthase (ir)                        | [m] : aaccoa + aaccoa + h2o --> coa + h + hmgscoa                                           | 4.1.3.5   | Cholesterol Metabolism                     | 3158.1                                                                                                          |
| HMGCOAtm      | Hydroxymethylglutaryl-CoA reversible mitochondrial transport   | hmgscoa[c] <=> hmgscoa[m]                                                                   |           | Transport, Mitochondrial                   |                                                                                                                 |
| HMGCOAtx      | Hydroxymethylglutaryl-CoA reversible peroxisomal transport     | hmgscoa[c] <=> hmgscoa[x]                                                                   |           | Transport, Peroxisomal                     |                                                                                                                 |
| HMGLm         | hydroxymethylglutaryl-CoA lyase                                | [m] : hmgscoa --> acac + aaccoa                                                             | 4.1.3.4   | Cholesterol Metabolism                     | ( 3155.1 or 54511.1 )                                                                                           |
| HMGLx         | hydroxymethylglutaryl-CoA lyase                                | [x] : hmgscoa --> acac + aaccoa                                                             | 4.1.3.4   | Cholesterol Metabolism                     | 3155.1                                                                                                          |
| HOM4          | L-homoserine via sodium symport                                | hom-L[e] + na[e] --> hom-L[c] + na[e]                                                       |           | Transport, Extracellular                   | ( 6541.1 or 6542.1 or 84889.1 )                                                                                 |
| HOXG          | Heme oxygenase 1                                               | [c] : (5) h + (3) nadph + (3) o2 + pheme --> biliverd + co + fe2 + (3) h2o + (3) nadp       | 1.14.99.3 | Heme Degradation                           | ( 3162.1 or 3163.1 )                                                                                            |
| HPACtr        | hydroxyphenylacetate transport via diffusion                   | 4hphac[c] <=> 4hphac[e]                                                                     |           | Transport, Extracellular                   |                                                                                                                 |
| HPCLx         | 2-hydroxyphytanoyl-CoA lyase                                   | [x] : (4) h + phyt2ohcoa --> formcoa + pristanal                                            |           | Fatty Acid Metabolism                      | 26062.1                                                                                                         |
| HPDCACRNCPT1  | carnitine fatty-acyl transferase                               | [c] : crn + hpdcacoa --> coa + hpdcaern                                                     | 2.3.1.21  | Carnitine shuttle                          | ( 1375.3 or 126129.1 or 1374.1 or 1375.2 or 1375.1 )                                                            |
| HPDCACRNCPT2  | heptadecanoate transport into the mitochondria                 | [m] : coa + hpdcaern --> crn + hpdcacoa                                                     |           | Carnitine shuttle                          | 1376.1                                                                                                          |
| HPDCACRNt     | heptadecanoate transport into the mitochondria                 | hpdcaern[c] --> hpdcaern[m]                                                                 |           | Carnitine shuttle                          | 788.1                                                                                                           |
| HPDCAt        | fatty acid transport via diffusion                             | hpdca[e] <=> hpdca[c]                                                                       |           | Transport, Extracellular                   |                                                                                                                 |
| HPROxm        | L-hydroxyproline dehydrogenase (NAD), mitochondrial            | [m] : 4hpro-LT + nad --> lp3h5c + (2) h + nadh                                              | 1.5.1.12  | Arginine and Proline Metabolism            | ( 8659.1 or 8659.2 )                                                                                            |
| HPYRDc        | hydroxypyruvate decarboxylase                                  | [c] : h + hpyr --> co2 + gcald                                                              | 4.1.1.40  | Glyoxylate and Dicarboxylate Metabolism    |                                                                                                                 |
| HPYRDcm       | hydroxypyruvate decarboxylase, mitochondria                    | [m] : h + hpyr --> co2 + gcald                                                              | 4.1.1.40  | Glyoxylate and Dicarboxylate Metabolism    |                                                                                                                 |

| Abbreviation | Reaction Name                                                                | Reaction                                                              | E.C. #   | Pathway                                 | Gene association                                                                                                                                                                                            |
|--------------|------------------------------------------------------------------------------|-----------------------------------------------------------------------|----------|-----------------------------------------|-------------------------------------------------------------------------------------------------------------------------------------------------------------------------------------------------------------|
| HPYRR2x      | hydroxypyruvate reductase (NADH)                                             | [c] : h + hpyr + nadh --> glyc-S + nad                                |          | Glyoxylate and Dicarboxylate Metabolism | (197257.1 or 197257.2 or 3948.2 or 3948.1 or 3945.1 or 92483.1 or 160287.1 or 3939.1 or (3945.1 and 3939.1) )                                                                                               |
| HPYRRy       | Hydroxypyruvate reductase (NADPH)                                            | [c] : h + hpyr + nadph --> glyc-R + nadp                              |          | Glyoxylate and Dicarboxylate Metabolism | 9380.1                                                                                                                                                                                                      |
| HPYRrp       | hydroxypyruvate transport, peroxisomal                                       | hpyr[c] <=> hpyr[x]                                                   |          | Transport, Peroxisomal                  |                                                                                                                                                                                                             |
| HRETn        | 4-hydroxyretinoic acid transport, Nuclear                                    | hret[n] <=> hret[n]                                                   |          | Transport, Nuclear                      |                                                                                                                                                                                                             |
| HS1y         | heparan-N-sulfatase, lysosomal                                               | [l] : h2o + hs_deg1 --> h + hs_deg2 + so4                             | 3.10.1.1 | Heparan sulfate degradation             | 6448.1                                                                                                                                                                                                      |
| HS2y         | heparan-N-sulfatase, lysosomal                                               | [l] : h2o + hs_deg6 --> h + hs_deg7 + so4                             | 3.10.1.1 | Heparan sulfate degradation             | 6448.1                                                                                                                                                                                                      |
| HS3y         | heparan-N-sulfatase, lysosomal                                               | [l] : h2o + hs_deg12 --> h + hs_deg13 + so4                           | 3.10.1.1 | Heparan sulfate degradation             | 6448.1                                                                                                                                                                                                      |
| HS4y         | heparan-N-sulfatase, lysosomal                                               | [l] : h2o + hs_deg18 --> h + hs_deg19 + so4                           | 3.10.1.1 | Heparan sulfate degradation             | 6448.1                                                                                                                                                                                                      |
| HSAT1y       | heparan-glucosaminide N-acetyltransferase, lysosomal                         | accoa[c] + hs_deg2[l] --> coa[c] + h[l] + hs_deg3[l]                  | 2.3.1.78 | Heparan sulfate degradation             |                                                                                                                                                                                                             |
| HSAT2y       | heparan-glucosaminide N-acetyltransferase, lysosomal                         | accoa[c] + hs_deg7[l] --> coa[c] + h[l] + hs_deg8[l]                  | 2.3.1.78 | Heparan sulfate degradation             |                                                                                                                                                                                                             |
| HSAT3y       | heparan-glucosaminide N-acetyltransferase, lysosomal                         | accoa[c] + hs_deg13[l] --> coa[c] + h[l] + hs_deg14[l]                | 2.3.1.78 | Heparan sulfate degradation             |                                                                                                                                                                                                             |
| HSAT4y       | heparan-glucosaminide N-acetyltransferase, lysosomal                         | accoa[c] + hs_deg19[l] --> coa[c] + h[l] + hs_deg20[l]                | 2.3.1.78 | Heparan sulfate degradation             |                                                                                                                                                                                                             |
| HSD11B1r     | 11-beta-hydroxysteroid dehydrogenase type 1                                  | [r] : cortsn + h + nadph <=> crtl + nadp                              |          | Steroid Metabolism                      | (3290.1 or 3290.2)                                                                                                                                                                                          |
| HSD11B2r     | 11-beta-hydroxysteroid dehydrogenase type 2                                  | [r] : cortsn + h + nadh <=> crtl + nad                                |          | Steroid Metabolism                      | 3291.1                                                                                                                                                                                                      |
| HSD17B1      | testicular 17-beta-hydroxysteroid dehydrogenase                              | [c] : estrone + h + nadph <=> estradiol + nadp                        | 1.1.1.62 | Steroid Metabolism                      | (3292.1 or 7923.1)                                                                                                                                                                                          |
| HSD17B2r     | 17-beta-hydroxysteroid dehydrogenase                                         | [r] : andrstdn + h + nadh --> nad + tststerone                        | 1.1.1.62 | Steroid Metabolism                      | 3294.1                                                                                                                                                                                                      |
| HSD17B3r     | testicular 17-beta-hydroxysteroid dehydrogenase                              | [r] : andrstdn + h + nadph --> nadp + tststerone                      | 1.1.1.62 | Steroid Metabolism                      | 3293.1                                                                                                                                                                                                      |
| HSD17B42x    | hydroxysteroid (17-beta) dehydrogenase 4                                     | [x] : h + nadph + o2 + thcoloylcoa --> dhocholoylcoa + (2) h2o + nadp |          | Bile Acid Biosynthesis                  | 3295.1                                                                                                                                                                                                      |
| HSD17B4x     | hydroxysteroid (17-beta) dehydrogenase 4                                     | [x] : cholcoads + h + nadph + o2 --> cholcoadone + h2o + nadp         |          | Bile Acid Biosynthesis                  | 3295.1                                                                                                                                                                                                      |
| HSD17B7r     | testicular 17-beta-hydroxysteroid dehydrogenase                              | [r] : estrone + h + nadph --> estradiol + nadp                        | 1.1.1.62 | Steroid Metabolism                      | 51478.1                                                                                                                                                                                                     |
| HSD17B8r     | 17-beta-hydroxysteroid dehydrogenase                                         | [r] : estrone + h + nadh --> estradiol + nad                          | 1.1.1.62 | Steroid Metabolism                      | 3294.1                                                                                                                                                                                                      |
| HSD17B9r     | 17-beta-hydroxysteroid dehydrogenase (type 7)                                | [r] : andrstrn + h + nadph + (1.5) o2 --> eandrstrn + (2) h2o + nadp  |          | Steroid Metabolism                      | 51478.1                                                                                                                                                                                                     |
| HSD3A1r      | 3 alpha-hydroxysteroid dehydrogenase (type 3)                                | [r] : andrstandn + h + nadh <=> andrstrn + nad                        |          | Steroid Metabolism                      | 1109.1                                                                                                                                                                                                      |
| HSD3A2r      | 3 alpha-hydroxysteroid dehydrogenase (type 3)                                | [r] : andrstandn + h + nadph <=> andrstrn + nadp                      |          | Steroid Metabolism                      | 1109.1                                                                                                                                                                                                      |
| HSD3B11      | 3 beta-hydroxysteroid dehydrogenase/delta 5->4-isomerase type I              | [c] : nad + prgnlone --> h + nadh + prgstrn                           |          | Steroid Metabolism                      | 3283.1                                                                                                                                                                                                      |
| HSD3B11r     | 3 beta-hydroxysteroid dehydrogenase/delta 5->4-isomerase type I              | [r] : nad + prgnlone --> h + nadh + prgstrn                           |          | Steroid Metabolism                      | 3284.1                                                                                                                                                                                                      |
| HSD3B12r     | 3 beta-hydroxysteroid dehydrogenase/delta 5->4-isomerase type I              | [r] : dhea + nad --> andrstdn + h + nadh                              |          | Steroid Metabolism                      | 3284.1                                                                                                                                                                                                      |
| HSD3B13      | 3 beta-hydroxysteroid dehydrogenase/delta 5->4-isomerase type I              | [c] : 17ahprgnlone + nad --> 17ahprgstrn + h + nadh                   |          | Steroid Metabolism                      | 3283.1                                                                                                                                                                                                      |
| HSD3B13r     | 3 beta-hydroxysteroid dehydrogenase/delta 5->4-isomerase type I              | [r] : 17ahprgnlone + nad --> 17ahprgstrn + h + nadh                   |          | Steroid Metabolism                      | 3284.1                                                                                                                                                                                                      |
| HSD3B2r      | 3 beta-hydroxysteroid dehydrogenase type 1                                   | [r] : eandrstrn + h + nadh --> andrstandn + h2o + nad                 |          | Steroid Metabolism                      | 3284.1                                                                                                                                                                                                      |
| HSD3B3r      | 3 beta-hydroxysteroid dehydrogenase type 1                                   | [r] : eandrstrn + h + nadph --> andrstandn + h2o + nadp               |          | Steroid Metabolism                      | 3284.1                                                                                                                                                                                                      |
| HSD3B7       | hydroxy-delta-5-steroid dehydrogenase, 3 beta- and steroid delta-isomerase 7 | [r] : nad + xol7a --> h + nadh + xol7aone                             |          | Bile Acid Biosynthesis                  | 80270.1                                                                                                                                                                                                     |
| HSD3B7P      | hydroxy-delta-5-steroid dehydrogenase, 3 beta- and steroid delta-isomerase 7 | [r] : nadp + xol7a --> h + nadph + xol7aone                           |          | Bile Acid Biosynthesis                  | 80270.1                                                                                                                                                                                                     |
| HSPASEly     | heparan sulfate proteoglycan protease, lysosome (endosome)                   | [l] : h2o + hspg --> Ser-Gly/Ala-X-Gly + hs                           |          | Heparan sulfate degradation             |                                                                                                                                                                                                             |
| HSPGt        | heparan sulfate transport, golgi to extracellular                            | hspg[l] --> hspg[e]                                                   |          | Transport, Extracellular                |                                                                                                                                                                                                             |
| HSPGly       | heparan sulfate transport, extracellular to lysosome                         | hspg[e] --> hspg[l]                                                   |          | Transport, Lysosomal                    |                                                                                                                                                                                                             |
| HTAXOLte     | xenobiotic transport                                                         | htaxol[e] <=> htaxol[c]                                               |          | Transport, Extracellular                |                                                                                                                                                                                                             |
| Htm          | Uncoupling protein                                                           | h[c] --> h[m]                                                         |          | Transport, Mitochondrial                | (7352.1 or 7350.1 or 7351.1 or 7352.2 or 9481.1 or 9016.1 or 9016.2)                                                                                                                                        |
| Htr          | H transporter, endoplasmic reticulum                                         | h[c] <=> h[r]                                                         |          | Transport, Endoplasmic Reticular        |                                                                                                                                                                                                             |
| Htx          | H transporter, peroxisome                                                    | h[c] <=> h[x]                                                         |          | Transport, Peroxisomal                  |                                                                                                                                                                                                             |
| HXANtl       | hypoxanthine facilitated transport from lysosome                             | hxn[l] <=> hxn[c]                                                     |          | Transport, Lysosomal                    | 55315.1                                                                                                                                                                                                     |
| HXANtx       | hypoxanthine diffusion in peroxisome                                         | hxn[c] --> hxn[x]                                                     |          | Transport, Peroxisomal                  |                                                                                                                                                                                                             |
| HXPRT        | hypoxanthine phosphoribosyltransferase (Hypoxanthine)                        | [c] : hxn + prpp --> imp + ppi                                        | 2.4.2.8  | Salvage Pathway                         | 3251.1                                                                                                                                                                                                      |
| HYPOE        | hypothetical enzyme                                                          | [c] : h2o + pyam5p --> pi + pydam                                     |          | Vitamin B6 Metabolism                   | 57026.1                                                                                                                                                                                                     |
| HYPTROX      | Hypotaurine oxidase                                                          | [c] : (2) h + (2) hpytaur + o2 --> (2) taur                           |          | Taurine and hypotaurine metabolism      |                                                                                                                                                                                                             |
| HYXNt        | Hypoxanthine transport                                                       | hxn[e] <=> hxn[c]                                                     |          | Transport, Extracellular                | 3177.1                                                                                                                                                                                                      |
| ICDHxm       | Isocitrate dehydrogenase (NAD+)                                              | [m] : icit + nad --> akc + co2 + nadh                                 | 1.1.1.41 | Citric Acid Cycle                       | ((3421.1 and 3419.1 and 3420.1) or (3421.1 and 3420.2 and 3419.1) or (3421.1 and 3419.1 and 3420.3) or (3421.1 and 3419.1 and 3420.1) or (3420.2 and 3419.1 and 3421.2) or (3419.1 and 3421.2 and 3420.3) ) |
| ICDHy        | isocitrate dehydrogenase (NADP)                                              | [c] : icit + nadp --> akc + co2 + nadph                               | 1.1.1.42 | Citric Acid Cycle                       | 3417.1                                                                                                                                                                                                      |
| ICDHyp       | isocitrate dehydrogenase (NADP+)                                             | [x] : icit + nadp --> akc + co2 + nadph                               | 1.1.1.42 | Citric Acid Cycle                       | 3417.1                                                                                                                                                                                                      |
| ICDHym       | isocitrate dehydrogenase (NADP+)                                             | [m] : icit + nadp <=> akc + co2 + nadph                               | 1.1.1.42 | Citric Acid Cycle                       | 3418.1                                                                                                                                                                                                      |
| IDHPOXX2b    | Iodide:hydrogen-peroxide oxidoreductase 2                                    | [c] : 3ityr-L + iodine --> 35dioty + h + i                            | 1.11.1.8 | Tyrosine metabolism                     | (7173.1 or 7173.2 or 7173.3 or 7173.4 or 7173.5)                                                                                                                                                            |

| Abbreviation | Reaction Name                                                    | Reaction                                                                                          | E.C. #    | Pathway                                    | Gene association                                                         |
|--------------|------------------------------------------------------------------|---------------------------------------------------------------------------------------------------|-----------|--------------------------------------------|--------------------------------------------------------------------------|
| IDHPOXOX3    | Iodide:hydrogen-peroxide oxidoreductase 3                        | [c] : 35diotytr + 3ityr-L + h2o2 --> 2amac + (2) h2o + triodthy                                   | 1.11.1.8  | Tyrosine metabolism                        | ( 7173.1 or 7173.2 or 7173.3 or 7173.4 or 7173.5 )                       |
| IDHPOXOX4    | Iodide:hydrogen-peroxide oxidoreductase 4                        | [c] : (2) 35diotytr + h2o2 --> 2amac + (2) h2o + thyox-L                                          | 1.11.1.8  | Tyrosine metabolism                        | ( 7173.1 or 7173.2 or 7173.3 or 7173.4 or 7173.5 )                       |
| IDHPOXOXb    | Iodide:hydrogen-peroxide oxidoreductase                          | [c] : iodine + tyr-L --> 3ityr-L + h + i                                                          | 1.11.1.8  | Tyrosine metabolism                        | ( 7173.1 or 7173.2 or 7173.3 or 7173.4 or 7173.5 )                       |
| IDOAASE1ly   | alpha-L-iduronidase, lysosomal                                   | [l] : h2o + hs_deg4 --> hs_deg5 + idour                                                           | 3.2.1.76  | Heparan sulfate degradation                | 3425.1                                                                   |
| IDOAASE2ly   | alpha-L-iduronidase, lysosomal                                   | [l] : h2o + hs_deg16 --> hs_deg17 + idour                                                         | 3.2.1.76  | Heparan sulfate degradation                | 3425.1                                                                   |
| IDOAASE3ly   | alpha-L-iduronidase, lysosomal                                   | [l] : h2o + hs_deg22 --> hs_deg23 + idour                                                         | 3.2.1.76  | Heparan sulfate degradation                | 3425.1                                                                   |
| IDOAASE4ly   | alpha-L-iduronidase, lysosomal                                   | [l] : cs_b_deg3 + h2o --> cs_a_deg3 + idour                                                       | 3.2.1.76  | Chondroitin sulfate degradation            | 3425.1                                                                   |
| IDOURty      | iduronate transport into lysosome                                | h[c] + idour[c] <=> h[l] + idour[l]                                                               |           | Transport, Lysosomal                       | 26503.1                                                                  |
| IDPtn        | IDP nuclear transport                                            | idp[c] <=> idp[n]                                                                                 |           | Transport, Nuclear                         |                                                                          |
| ILEt4        | L-isoleucine transport in via sodium symport                     | ile-L[e] + na[l]e --> ile-L[c] + na[l]c                                                           |           | Transport, Extracellular                   | 11254.1                                                                  |
| ILEt5m       | Isoleucine mitochondrial transport                               | ile-L[c] <=> ile-L[m]                                                                             |           | Transport, Mitochondrial                   |                                                                          |
| ILETA        | isoleucine transaminase                                          | [c] : akq + ile-L <=> 3mop + glu-L                                                                | 2.6.1.42  | Valine, Leucine, and Isoleucine Metabolism | 586.1                                                                    |
| ILETA_m      | isoleucine transaminase, mitochondrial                           | [m] : akq + ile-L <=> 3mop + glu-L                                                                | 2.6.1.42  | Valine, Leucine, and Isoleucine Metabolism | 587.1                                                                    |
| ILEtec       | L-isoleucine transport via diffusion (extracellular to cytosol)  | ile-L[e] <=> ile-L[c]                                                                             |           | Transport, Extracellular                   | ( 8501.1 or 124935.1 )                                                   |
| IMACTD       | Imidazole acetaldehyde dehydrogenase                             | [c] : h2o + im4act + nad --> (2) h + im4ac + nadh                                                 | 1.2.1.3   | Histidine Metabolism                       | ( 224.1 or 501.1 or 8854.2 or 8854.1 or 8854.3 or 216.1 or 223.1 )       |
| IMACTD_m     | Imidazole acetaldehyde dehydrogenase (mito)                      | [m] : h2o + im4act + nad --> (2) h + im4ac + nadh                                                 | 1.2.1.3   | Histidine Metabolism                       | ( 8659.1 or 8659.2 or 217.1 or 219.1 )                                   |
| IMPC         | IMP cyclohydrolase                                               | [c] : h2o + imp <=> fprica                                                                        | 3.5.4.10  | IMP Biosynthesis                           | 471.1                                                                    |
| IMPD         | IMP dehydrogenase                                                | [c] : h2o + imp + nad --> h + nadh + xmp                                                          | 1.1.1.205 | Nucleotides                                | ( 3614.1 or 3614.2 or 3615.1 )                                           |
| INOSTO       | inositol oxygenase                                               | [c] : inost + o2 --> glcur + h + h2o                                                              | 1.13.99.1 | Inositol Phosphate Metabolism              | 55586.1                                                                  |
| INSKm        | inosine kinase, mitochondrial                                    | [m] : atp + ins --> adp + h + imp                                                                 | 2.7.1.73  | Nucleotides                                |                                                                          |
| INSI         | Inosine transport (diffusion)                                    | ins[e] <=> ins[c]                                                                                 |           | Transport, Extracellular                   | ( 3177.1 or 2030.1 )                                                     |
| INSt4        | inosine transport in via sodium symport                          | ins[e] + na[l]e --> ins[c] + na[l]c                                                               |           | Transport, Extracellular                   | ( 9153.1 or 64078.1 )                                                    |
| INSI5        | inosine transport in via sodium (1:2) symport                    | ins[e] + (2) na[l]e --> ins[c] + (2) na[l]c                                                       |           | Transport, Extracellular                   | 64078.1                                                                  |
| INSd         | inosine facilitated transport from lysosome                      | ins[l] <=> ins[c]                                                                                 |           | Transport, Lysosomal                       | 55315.1                                                                  |
| INSUm        | inosine facilitated transport in mitochondria                    | ins[c] <=> ins[m]                                                                                 |           | Transport, Mitochondrial                   | 2030.1                                                                   |
| INST12r      | inositol transport in via proton symport                         | h[e] + inost[e] <=> h[c] + inost[c]                                                               |           | Transport, Extracellular                   | 114134.1                                                                 |
| INSTt4       | inositol transport via sodium symport                            | inost[e] + na[l]e <=> inost[c] + na[l]c                                                           |           | Transport, Extracellular                   | 6526.1                                                                   |
| INSTt4_2     | inositol transport via sodium symport                            | inost[e] + (2) na[l]e <=> inost[c] + (2) na[l]c                                                   |           | Transport, Extracellular                   | 115584.1                                                                 |
| IPDD1x       | isopentenyl-diphosphate D-isomerase                              | [x] : ipdp <=> dmpp                                                                               | 5.3.3.2   | Cholesterol Metabolism                     | ( 3422.1 or 91734.1 )                                                    |
| It           | Iodide uniport                                                   | i[e] <=> i[c]                                                                                     |           | Transport, Extracellular                   | 160728.1                                                                 |
| ITCOAL1m     | Itaconate--CoA ligase (GDP-forming), mitochondrial               | [m] : coa + gtp + itacon <=> gdp + itaccoa + pi                                                   | 6.2.1.4   | C5-Branched dibasic acid metabolism        | ( 8802.1 and 8801.1 )                                                    |
| ITCOALm      | Itaconate--CoA ligase (ADP-forming), mitochondrial               | [m] : atp + coa + itacon <=> adp + itaccoa + pi                                                   | 6.2.1.5   | C5-Branched dibasic acid metabolism        | ( 8802.1 and 8803.1 )                                                    |
| ITPtn        | ITP nuclear transport                                            | itp[c] <=> itp[n]                                                                                 |           | Transport, Nuclear                         |                                                                          |
| IZPN         | imidazolepropionase                                              | [c] : 4izp + h2o --> forglu + h                                                                   | 3.5.2.7   | Histidine Metabolism                       |                                                                          |
| KAS8         | b-ketoacyl synthetase (palmitate, n-C16:0)                       | [c] : accoa + (20) h + (7) malcoa + (14) nadph --> (7) co2 + (8) coa + (6) h2o + hcoa + (14) nadp | 2.3.1.41  | Fatty acid elongation                      | 2194.1                                                                   |
| KCC2t        | K+-Cl- cotransporter (NH4+)                                      | cl[e] + nh4[e] <=> cl[c] + nh4[c]                                                                 |           | Transport, Extracellular                   | ( 6560.1 or 9990.1 or 10723.1 )                                          |
| KCCt         | K+-Cl- cotransport                                               | cl[e] + k[e] <=> cl[c] + k[c]                                                                     |           | Transport, Extracellular                   | ( 57468.1 or 6560.1 or 9990.1 or 10723.1 )                               |
| KDNH         | 2-keto-3-deoxy-D-glycero-D-galactonic acid phosphohydrolase      | [c] : h2o + kdnp --> kdn + pi                                                                     |           | Aminosugar Metabolism                      |                                                                          |
| KHK          | ketohekokinase                                                   | [c] : atp + fru --> adp + f1p + h                                                                 | 2.7.1.3   | Fructose and Mannose Metabolism            | ( 3795.1 or 3795.2 )                                                     |
| KHK2         | ketohekokinase (D-xylose)                                        | [c] : atp + xylo-D --> adp + h + xu1p-D                                                           | 2.7.1.3   | Glyoxylate and Dicarboxylate Metabolism    | ( 3795.1 or 3795.2 )                                                     |
| KHK3         | ketohekokinase (D-tagatose)                                      | [c] : atp + tagat-D --> adp + h + tag1p-D                                                         | 2.7.1.3   | Galactose metabolism                       | ( 3795.1 or 3795.2 )                                                     |
| KSII_CORE2t  | keratan sulfate II (core2) transport, golgi to extracellular     | ksii_core2[g] --> ksii_core2[e]                                                                   |           | Transport, Extracellular                   |                                                                          |
| KSII_CORE2ty | keratan sulfate II (core 2) transport, extracellular to lysosome | ksii_core2[e] --> ksii_core2[l]                                                                   |           | Transport, Lysosomal                       |                                                                          |
| KSII_CORE4t  | keratan sulfate II (core4) transport, golgi to extracellular     | ksii_core4[g] --> ksii_core4[e]                                                                   |           | Transport, Extracellular                   |                                                                          |
| KSII_CORE4ty | keratan sulfate II (core 4) transport, extracellular to lysosome | ksii_core4[e] --> ksii_core4[l]                                                                   |           | Transport, Lysosomal                       |                                                                          |
| KSIt         | keratan sulfate I transport, golgi to extracellular              | ksil[g] --> ksil[e]                                                                               |           | Transport, Extracellular                   |                                                                          |
| KSItly       | keratan sulfate I transport, extracellular to lysosome           | ksil[e] --> ksil[l]                                                                               |           | Transport, Lysosomal                       |                                                                          |
| KI3g         | potassium transport via proton antiport                          | h[g] + k[c] <=> h[c] + k[g]                                                                       |           | Transport, Golgi Apparatus                 | ( 84679.1 or 23315.1 )                                                   |
| KYN          | kynureninase                                                     | [c] : Lkynr + h2o --> ala-L + anth + h                                                            | 3.7.1.3   | Tryptophan metabolism                      | 8942.1                                                                   |
| KYN3OX       | kynurenine 3-monooxygenase                                       | [c] : Lkynr + h + nadph + o2 --> h2o + hLkynr + nadp                                              | 1.14.13.9 | Tryptophan metabolism                      | 8564.1                                                                   |
| KYNAKGAT     | L-Kynurenine:2-oxoglutarate aminotransferase                     | [c] : Lkynr + akq --> 4aphdob + glu-L                                                             | 2.6.1.7   | Tryptophan metabolism                      | ( 51166.1 or 51166.2 or 883.1 )                                          |
| KYNATESYN    | 4-(2-Aminophenyl)-2,4-dioxobutanoate dehydratase                 | [c] : 4aphdob --> h2o + kynate                                                                    |           | Tryptophan metabolism                      |                                                                          |
| LACZe        | b-galactosidase, extracellular                                   | [e] : h2o + lct5 --> gal + gle-D                                                                  | 3.2.1.23  | Galactose metabolism                       | 3938.1                                                                   |
| LACZly       | b-galactosidase,lysosomal                                        | [l] : h2o + lct5 --> gal + gle-D                                                                  | 3.2.1.23  | Galactose metabolism                       | ( ( 2588.1 and 4758.1 and 5476.1 and 2720.1 ) or ( 2720.1 and 5476.1 ) ) |
| LALDD        | D-lactaldehyde dehydrogenase                                     | [c] : lald-D + nadp <=> h + mthglx + nadph                                                        | 1.1.1.79  | Pyruvate Metabolism                        | 9380.1                                                                   |
| LALDO        | D-Lactaldehyde:NAD+ oxidoreductase (glutathione-formylating)     | [c] : gthrd + lald-D + nad <=> h + lgt-S + nadh                                                   |           | Pyruvate Metabolism                        | 128.1                                                                    |
| LALDO2       | D-Lactaldehyde:NADP+ 1-oxidoreductase                            | [c] : h + mthglx + nadph --> lald-D + nadp                                                        | 1.1.1.21  | Pyruvate Metabolism                        | ( 8574.1 or 231.1 or 10327.1 )                                           |
| LALDO2x      | D-Lactaldehyde:NAD+ 1-oxidoreductase                             | [c] : h + mthglx + nadh --> lald-D + nad                                                          | 1.1.1.21  | Pyruvate Metabolism                        | 8574.1                                                                   |
| LAPCOAI      | lysosomal acid phosphorylase (CoA)                               | [l] : coa + h2o --> dpcoa + pi                                                                    |           | CoA Catabolism                             | 53.1                                                                     |

| Abbreviation | Reaction Name                                                     | Reaction                                                                                     | E.C. #   | Pathway                                    | Gene association                                                                                       |
|--------------|-------------------------------------------------------------------|----------------------------------------------------------------------------------------------|----------|--------------------------------------------|--------------------------------------------------------------------------------------------------------|
| LCADI        | lactaldehyde dehydrogenase                                        | [c] : h2o + lald-L + nad -> (2) h + lac-L + nadh                                             | 1.2.1.21 | Pyruvate Metabolism                        | ( 216.1 or 8854.1 or 8854.2 or 8854.3 or 220.1 or 218.1 or 224.1 or 221.1 or 222.1 or 501.1 or 223.1 ) |
| LCADI_D      | lactaldehyde dehydrogenase                                        | [c] : h2o + lald-D + nad -> (2) h + lac-D + nadh                                             | 1.2.1.21 | Pyruvate Metabolism                        | ( 216.1 or 8854.1 or 8854.2 or 8854.3 or 220.1 or 218.1 or 224.1 or 221.1 or 222.1 or 501.1 or 223.1 ) |
| LCADI_Dm     | lactaldehyde dehydrogenase, mitochondrial                         | [m] : h2o + lald-D + nad -> (2) h + lac-D + nadh                                             | 1.2.1.21 | Pyruvate Metabolism                        | ( 5832.1 or 219.1 or 217.1 or 8659.1 or 8659.2 or 7915.1 or 7915.2 or 4329.1 )                         |
| LCADim       | lactaldehyde dehydrogenase, mitochondrial                         | [m] : h2o + lald-L + nad -> (2) h + lac-L + nadh                                             | 1.2.1.21 | Pyruvate Metabolism                        | ( 5832.1 or 219.1 or 217.1 or 8659.1 or 8659.2 or 7915.1 or 7915.2 or 4329.1 )                         |
| LCAT1e       | Lecithin-cholesterol acyltransferase                              | [e] : chsterol + pchol_hs -> lpchol_hs + xolest2_hs                                          | 2.3.1.43 | Fatty Acid Metabolism                      | 3931.1                                                                                                 |
| LCTStg       | lactose transport from Golgi to extracellular (via vesicle)       | lct[s]g -> lct[s]e                                                                           |          | Transport, Extracellular                   |                                                                                                        |
| LCTStl       | lactose transport from cytosol to lysosome (via autophagocytosis) | lct[s]c -> lct[s]l                                                                           |          | Transport, Lysosomal                       |                                                                                                        |
| LCYSTAT      | L-Cysteate:2-oxoglutarate aminotransferase                        | [c] : Lcyst + akgl <=> 3spyr + glu-L                                                         |          | Cysteine Metabolism                        | 2805.1                                                                                                 |
| LCYSTATm     | L-Cysteate:2-oxoglutarate aminotransferase, mitochondrial         | [m] : Lcyst + akgl <=> 3spyr + glu-L                                                         |          | Cysteine Metabolism                        | 2806.1                                                                                                 |
| LCYSTCBOXL   | 3-Sulfoalanine carboxy-lyase                                      | [c] : Lcyst + h -> co2 + taur                                                                | 4.1.1.15 | Taurine and hypotaurine metabolism         | ( 2571.1 or 2571.2 or 2572.1 or 51380.1 )                                                              |
| LDH_D        | D-lactate dehydrogenase                                           | [c] : lac-D + nad <=> h + nadh + pyr                                                         | 1.1.1.28 | Pyruvate Metabolism                        | ( 197257.1 or 197257.2 )                                                                               |
| LDH_L        | L-lactate dehydrogenase                                           | [c] : lac-L + nad <=> h + nadh + pyr                                                         | 1.1.1.27 | Glycolysis/Gluconeogenesis                 | ( 3939.1 or 3945.1 or 3948.1 or 3948.2 or 92483.1 or 160287.1 or 55293.1 or ( 3945.1 and 3939.1 ) )    |
| LDH_Lm       | L-lactate dehydrogenase                                           | [m] : lac-L + nad <=> h + nadh + pyr                                                         | 1.1.1.27 | Pyruvate Metabolism                        | 3939.1                                                                                                 |
| LEUKTRA4tr   | leukotriene intracellular transport                               | leuktrA4[c] <=> leuktrA4[r]                                                                  |          | Transport, Endoplasmic Reticular           |                                                                                                        |
| LEUKTRB4tr   | leukotriene intracellular transport                               | leuktrB4[c] <=> leuktrB4[r]                                                                  |          | Transport, Endoplasmic Reticular           |                                                                                                        |
| LEUKTRC4t    | leukotriene C4 transport via bicarbonate countertransport         | hco3[c] + leuktrC4[e] <=> hco3[e] + leuktrC4[c]                                              |          | Transport, Extracellular                   | ( 10599.1 or 28234.1 )                                                                                 |
| LEUKTRD4tr   | leukotriene intracellular transport                               | leuktrD4[c] <=> leuktrD4[r]                                                                  |          | Transport, Endoplasmic Reticular           |                                                                                                        |
| LEU14        | L-leucine transport in via sodium symport                         | leu-L[e] + na1[e] -> leu-L[c] + na1[c]                                                       |          | Transport, Extracellular                   | ( 11254.1 or 6520.1 or 55089.1 or 81539.1 or 6541.1 or 6542.1 or 84889.1 )                             |
| LEU15m       | leucine mitochondrial transport                                   | leu-L[e] <=> leu-L[m]                                                                        |          | Transport, Mitochondrial                   |                                                                                                        |
| LEUTA        | leucine transaminase                                              | [c] : akgl + leu-L <=> 4mop + glu-L                                                          | 2.6.1.6  | Valine, Leucine, and Isoleucine Metabolism | 586.1                                                                                                  |
| LEUTAm       | leucine transaminase, mitochondrial                               | [m] : akgl + leu-L <=> 4mop + glu-L                                                          | 2.6.1.6  | Valine, Leucine, and Isoleucine Metabolism | 587.1                                                                                                  |
| LEUtec       | L-leucine transport via diffusion (extracellular to cytosol)      | leu-L[e] <=> leu-L[c]                                                                        |          | Transport, Extracellular                   | ( 8501.1 or 124935.1 )                                                                                 |
| LFORKYNHYD   | L-Formylkynurenine hydrolase                                      | [c] : Lfmkynr + h2o -> ala-L + h + nformanth                                                 | 3.7.1.3  | Tryptophan metabolism                      | 8942.1                                                                                                 |
| LGNCCOAx     | fatty acid intracellular transport                                | lgnccoa[c] <=> lgnccoa[s]                                                                    |          | Transport, Peroxisomal                     |                                                                                                        |
| LGNCCPT1     | carnitine O-palmitoyltransferase                                  | [c] : crn + lgnccoa -> coa + lgnccrn                                                         | 2.3.1.21 | Carnitine shuttle                          | ( 1375.4 or 1374.1 or 126129.1 or 1375.3 or 1375.2 or 1375.1 )                                         |
| LGNCCPT2     | transport into the mitochondria (carnitine)                       | [m] : coa + lgnccrn -> crn + lgnccoa                                                         |          | Carnitine shuttle                          | 1376.1                                                                                                 |
| LGNCCRNt     | transport into the mitochondria (carnitine)                       | lgnccrn[c] -> lgnccrn[m]                                                                     |          | Carnitine shuttle                          | 788.1                                                                                                  |
| LGNCl        | fatty acid transport via diffusion                                | lgn[c] <=> lgn[c]                                                                            |          | Transport, Extracellular                   |                                                                                                        |
| LGTHL        | lactylglutathione lyase                                           | [c] : gthrd + mthgd -> lgt-S                                                                 | 4.4.1.5  | Pyruvate Metabolism                        | 2739.1                                                                                                 |
| LIMNte       | senobiotic transport                                              | limnen[e] <=> limnen[c]                                                                      |          | Transport, Extracellular                   |                                                                                                        |
| LINKDEG1ly   | degradation of proteoglycan linkage region, lysosomal             | [l] : (3) h2o + hs_deg25 -> (2) gal + glcur + xyl-D                                          |          | Heparan sulfate degradation                |                                                                                                        |
| LINKDEG2ly   | degradation of proteoglycan linkage region, lysosomal             | [l] : cs_a_deg5 + (4) h2o -> (2) gal + glcur + h + so4 + xyl-D                               |          | Chondroitin sulfate degradation            |                                                                                                        |
| LINKDEG3ly   | degradation of proteoglycan linkage region, lysosomal             | [l] : cs_e_deg5 + (4) h2o -> (2) gal + glcur + h + so4 + xyl-D                               |          | Chondroitin sulfate degradation            |                                                                                                        |
| LINKDEG4ly   | degradation of proteoglycan linkage region, lysosomal             | [l] : cs_e_deg7 + (5) h2o -> (2) gal + glcur + (2) h + (2) so4 + xyl-D                       |          | Chondroitin sulfate degradation            |                                                                                                        |
| LIPOit       | Lipote transport via sodium symport                               | atp[c] + h2o[c] + lipoate[e] + (2) na1[e] -> adp[c] + h[c] + lipoate[c] + (2) na1[c] + pi[c] |          | Transport, Extracellular                   | 8884.1                                                                                                 |
| L-LACDcm     | L-Lactate dehydrogenase, cytosolic/mitochondrial                  | (2) ficyC[m] + lac-L[c] -> (2) focyC[m] + (2) h[c] + pyr[c]                                  | 1.1.2.3  | Pyruvate Metabolism                        | 124637.1                                                                                               |
| L-LAC2r      | L-lactate reversible transport via proton symport                 | h[e] + lac-L[e] <=> h[c] + lac-L[c]                                                          |          | Transport, Extracellular                   | ( 6566.1 or 9194.1 or 23539.1 or 9123.1 )                                                              |
| L-LAC4r      | L-lactate reversible transport via sodium symport                 | lac-L[e] + na1[e] <=> lac-L[c] + na1[c]                                                      |          | Transport, Extracellular                   |                                                                                                        |
| L-LACcm      | L-lactate transport via diffusion (cytosol to mitochondria)       | lac-L[c] -> lac-L[m]                                                                         |          | Transport, Mitochondrial                   | 366.1                                                                                                  |
| L-LACm       | L-lactate transport, mitochondrial                                | h[c] + lac-L[c] <=> h[m] + lac-L[m]                                                          |          | Transport, Mitochondrial                   | 6566.1                                                                                                 |
| LNELDCCPT1   | carnitine O-palmitoyltransferase                                  | [c] : crn + lneldccoa -> coa + lneldcarn                                                     | 2.3.1.21 | Carnitine shuttle                          | ( 1375.4 or 1374.1 or 126129.1 or 1375.3 or 1375.2 or 1375.1 )                                         |
| LNELDCCPT2   | carnitine transferase                                             | [m] : coa + lneldcarn -> crn + lneldccoa                                                     |          | Carnitine shuttle                          | 1376.1                                                                                                 |
| LNELDCCRNt   | transport into the mitochondria (carnitine)                       | lneldcarn[c] -> lneldcarn[m]                                                                 |          | Carnitine shuttle                          | 788.1                                                                                                  |
| LNELDCl      | fatty acid transport via diffusion                                | lneld[e] <=> lneld[c]                                                                        |          | Transport, Extracellular                   |                                                                                                        |
| LNLCPT1      | carnitine O-palmitoyltransferase                                  | [c] : crn + lnleccoa -> coa + lnleccrn                                                       | 2.3.1.21 | Carnitine shuttle                          | ( 1375.4 or 1374.1 or 126129.1 or 1375.3 or 1375.2 or 1375.1 )                                         |
| LNLCPT2      | carnitine transferase                                             | [m] : coa + lnleccrn -> crn + lnleccoa                                                       |          | Carnitine shuttle                          | 1376.1                                                                                                 |
| LNLCRRNt     | transport into the mitochondria (carnitine)                       | lnleccrn[c] -> lnleccrn[m]                                                                   |          | Carnitine shuttle                          | 788.1                                                                                                  |
| LNLCt        | Linoleic acid (n-C18:2) transport in via diffusion                | lnl[c] <=> lnl[c]                                                                            |          | Transport, Extracellular                   |                                                                                                        |
| LNLCACPT1    | carnitine O-palmitoyltransferase                                  | [c] : crn + lnlncccoa -> coa + lnlnccarn                                                     | 2.3.1.21 | Carnitine shuttle                          | ( 1375.4 or 1374.1 or 126129.1 or 1375.3 or 1375.2 or 1375.1 )                                         |
| LNLCACPT2    | carnitine transferase                                             | [m] : coa + lnlnccarn -> crn + lnlncccoa                                                     |          | Carnitine shuttle                          | 1376.1                                                                                                 |



| Abbreviation | Reaction Name                                                          | Reaction                                                                        | E.C. #    | Pathway                                                | Gene association                                                                                                                  |
|--------------|------------------------------------------------------------------------|---------------------------------------------------------------------------------|-----------|--------------------------------------------------------|-----------------------------------------------------------------------------------------------------------------------------------|
| LNLNACRNi    | transport into the mitochondria (carnitine)                            | lnlnacrn[c] --> lnlnacrn[m]                                                     |           | Carnitine shuttle                                      | 788.1                                                                                                                             |
| LNLNCAi      | fatty acid transport via diffusion                                     | lnlnca[e] <=> lnlnca[e]                                                         |           | Transport, Extracellular                               |                                                                                                                                   |
| LNLNCGCPT1   | carnitine O-palmitoyltransferase                                       | [c] : crn + lnlncgco --> coa + lnlncgcrn                                        | 2.3.1.21  | Carnitine shuttle                                      | ( 1375.4 or 1374.1 or 126129.1 or 1375.3 or 1375.2 or 1375.1 )                                                                    |
| LNLNCGCPT2   | carnitine transferase                                                  | [m] : coa + lnlncgcrn --> crn + lnlncgco                                        |           | Carnitine shuttle                                      | 1376.1                                                                                                                            |
| LNLNCGCRNi   | transport into the mitochondria (carnitine)                            | lnlncgcrn[c] --> lnlncgcrn[m]                                                   |           | Carnitine shuttle                                      | 788.1                                                                                                                             |
| LNLNCGM      | fatty acid transport via diffusion                                     | lnlncg[e] <=> lnlncg[e]                                                         |           | Transport, Extracellular                               |                                                                                                                                   |
| LNS14DM      | cytochrome P450 lanosterol 14-alpha-demethylase (NADP)                 | [c] : (2) h + lanost + (3) nadph + (3) o2 --> 44mctr + for + (4) h2o + (3) nadp | 1.14.14.1 | Cholesterol Metabolism                                 | 11283.1                                                                                                                           |
| LNS14DMr     | cytochrome P450 lanosterol 14-alpha-demethylase                        | [r] : (2) h + lanost + (3) nadph + (3) o2 --> 44mctr + for + (4) h2o + (3) nadp | 1.14.14.1 | Cholesterol Metabolism                                 | 1595.1                                                                                                                            |
| LNSTLSr      | lanosterol synthase                                                    | [r] : Sq23epx --> lanost                                                        | 5.4.99.7  | Cholesterol Metabolism                                 | 4047.1                                                                                                                            |
| LPASE        | lysophospholipase                                                      | [c] : h2o + lpchol_hs --> Rtotal + g3pc + h                                     |           | Glycerophospholipid Metabolism                         | ( 5321.1 or 29124.1 or 1178.1 )                                                                                                   |
| LPCOXp       | L-pipecolate oxidase, peroxisomal                                      | [x] : Lpipecol + o2 --> h + h2o2 + thp2c                                        | 1.5.3.7   | Lysine Metabolism                                      | 51268.1                                                                                                                           |
| LPS          | lipase                                                                 | [c] : h2o + tag_hs --> Rtotal3 + dag_hs + h                                     | 3.1.1.3   | Triacylglycerol Synthesis                              | 4023.1                                                                                                                            |
| LPS2         | lipase                                                                 | [c] : dag_hs + h2o --> Rtotal + h + mag_hs                                      | 3.1.1.3   | Triacylglycerol Synthesis                              | 4023.1                                                                                                                            |
| LPS2e        | lipase, extracellular                                                  | [e] : dag_hs + h2o --> Rtotal + h + mag_hs                                      | 3.1.1.3   | Fatty Acid Metabolism                                  | 3990.1                                                                                                                            |
| LPS3         | lipase                                                                 | [c] : h2o + mag_hs --> Rtotal2 + glyce + h                                      | 3.1.1.23  | Triacylglycerol Synthesis                              | ( 11343.1 or 11343.2 )                                                                                                            |
| LPS3e        | lipase, extracellular                                                  | [e] : h2o + mag_hs --> Rtotal2 + glyce + h                                      | 3.1.1.23  | Fatty Acid Metabolism                                  | 3990.1                                                                                                                            |
| LPS4e        | phospholipase                                                          | [e] : h2o + pglyc_hs --> 1glyc_hs + Rtotal2 + h                                 |           | Triacylglycerol Synthesis                              | 50487.1                                                                                                                           |
| LPSe         | lipase                                                                 | [e] : h2o + tag_hs --> Rtotal3 + dag_hs + h                                     | 3.1.1.3   | Triacylglycerol Synthesis                              | ( 5407.1 or 5408.1 or 8513.1 or 9388.1 or 5406.1 or 3990.1 )                                                                      |
| LRAT         | Lecithin retinol acyltransferase                                       | [c] : pchol_hs + retinol --> lpchol_hs + reifa                                  |           | Vitamin A Metabolism                                   | 9227.1                                                                                                                            |
| LRAT1        | Lecithin retinol acyltransferase (11-cis)                              | [c] : pchol_hs + retinol-cis-11 --> 11-cis-reifa + lpchol_hs                    |           | Vitamin A Metabolism                                   |                                                                                                                                   |
| LRAT2        | Lecithin retinol acyltransferase (9-cis)                               | [c] : pchol_hs + retinol-9-cis --> 9-cis-reifa + lpchol_hs                      |           | Vitamin A Metabolism                                   |                                                                                                                                   |
| LS3          | Lumisterol 3 formation                                                 | [c] : pd3 <=> lum5                                                              |           | Vitamin D                                              |                                                                                                                                   |
| LSTO1r       | Lathosterol oxidase                                                    | [r] : chlsterol + h + nadph + o2 --> ddssterol + (2) h2o + nadp                 | 1.3.3.2   | Cholesterol Metabolism                                 | 6309.1                                                                                                                            |
| LSTO2r       | Lathosterol oxidase                                                    | [r] : h + lhstr1 + nadph + o2 --> 7dhcsterol + (2) h2o + nadp                   | 1.3.3.2   | Cholesterol Metabolism                                 | 6309.1                                                                                                                            |
| LTA4H        | Leukotriene A-4 hydrolase                                              | [c] : h2o + leuktrA4 --> leuktrB4                                               | 3.3.2.6   | Eicosanoid Metabolism                                  | 4048.1                                                                                                                            |
| LTC4CP       | Leukotriene C4 carboxypeptidase                                        | [c] : h2o + leuktrC4 <=> gly + leuktrF4                                         | 2.3.2.2   | Eicosanoid Metabolism                                  |                                                                                                                                   |
| LTC4Sr       | Leukotriene C4 synthase                                                | [r] : gthrd + leuktrA4 --> leuktrC4                                             |           | Eicosanoid Metabolism                                  | ( 4259.1 or 4258.1 or 4056.2 or 4056.1 )                                                                                          |
| LTD4DP       | Leukotriene D4 dipeptidase                                             | [c] : h2o + leuktrD4 <=> gly + leuktrE4                                         | 2.3.2.2   | Eicosanoid Metabolism                                  |                                                                                                                                   |
| LTDCL        | L-Tryptophan decarboxy-lyase                                           | [c] : h + trp-L --> eo2 + trypta                                                | 4.1.1.28  | Tryptophan metabolism                                  | 1644.1                                                                                                                            |
| LYSMTF1n     | histone-lysine N-methyltransferase, nuclear                            | [n] : amet + peplys --> Nmelys + ahcys                                          | 2.1.1.43  | Lysine Metabolism                                      | ( 10919.2 or 8385.2 or 79723.1 or 9813.1 or 387893.1 or 80854.1 or 10919.1 or 6839.1 or 9869.1 or 58508.1 or 58508.2 or 84444.1 ) |
| LYSMTF2n     | histone-lysine N-methyltransferase, nuclear                            | [n] : Nmelys + amet --> Ndmelys + ahcys                                         | 2.1.1.43  | Lysine Metabolism                                      | ( 10919.1 or 10919.2 or 8385.1 or 79723.1 or 9813.1 or 387893.1 or 80854.1 or 6839.1 or 9869.1 or 58508.1 or 58508.2 or 84444.1 ) |
| LYSMTF3n     | histone-lysine N-methyltransferase, nuclear                            | [n] : Ndmelys + amet --> Nmelys + ahcys                                         | 2.1.1.43  | Lysine Metabolism                                      | ( 10919.1 or 10919.2 or 8385.1 or 79723.1 or 9813.1 or 387893.1 or 80854.1 or 6839.1 or 9869.1 or 58508.1 or 58508.2 or 84444.1 ) |
| LYSOXp       | L-lysine oxidase, peroxisomal                                          | [x] : h2o + lys-L + o2 --> 6a2ohxt + h2o2 + nb4                                 | 1.4.3.14  | Lysine Metabolism                                      |                                                                                                                                   |
| LYS4         | L-lysine transport in via sodium symport                               | lys-L[e] + na1[e] --> lys-L[c] + na1[c]                                         |           | Transport, Extracellular                               | ( 11254.1 or 6584.1 )                                                                                                             |
| LYStiDF      | L-lysine transport via diffusion (extracellular to cytosol)            | lys-L[e] --> lys-L[c]                                                           |           | Transport, Extracellular                               | ( 55089.1 or 6541.1 or 6542.1 or 84889.1 )                                                                                        |
| LYStip       | L-lysine transport, peroxisomal (irreversible)                         | lys-L[c] --> lys-L[x]                                                           |           | Transport, Peroxisomal                                 |                                                                                                                                   |
| LYStm        | Lysine mitochondrial transport via ornithine carrier                   | h[m] + lys-L[c] <=> h[c] + lys-L[m]                                             |           | Transport, Mitochondrial                               | ( 83884.1 or 10166.1 )                                                                                                            |
| LYStn        | L-lysine transport, nuclear                                            | lys-L[c] <=> lys-L[n]                                                           |           | Transport, Nuclear                                     |                                                                                                                                   |
| M1316Mg      | mannosyl-oligosaccharide 1,3-1,6-alpha-mannosidase                     | [g] : (2) h2o + nm4masn --> (2) man + nm2masn                                   | 3.2.1.114 | N-Glycan Biosynthesis                                  | ( 4124.1 or 4122.1 )                                                                                                              |
| M13N2Tg      | alpha-1,3-mannosyl-glycoprotein 2-beta-N-acetylglucosaminyltransferase | [g] : m4masn + uacgam --> h + nm4masn + udp                                     | 2.4.1.101 | N-Glycan Biosynthesis                                  | 4245.1                                                                                                                            |
| M13N4Tg      | alpha-1,3-mannosyl-glycoprotein 4-beta-N-acetylglucosaminyltransferase | [g] : n2m2masn + uacgam --> h + n3m2masn + udp                                  | 2.4.1.145 | N-Glycan Biosynthesis                                  | ( 11320.1 or 11282.1 or 11282.2 )                                                                                                 |
| M14NTg       | beta-1,4-mannosyl-glycoprotein 4-beta-N-acetylglucosaminyltransferase  | [g] : n2m2masn + uacgam --> h + n2m2masn + udp                                  | 2.4.1.144 | N-Glycan Biosynthesis                                  | 4248.1                                                                                                                            |
| M16N4Tg      | alpha-1,6-mannosyl-glycoprotein 4-beta-N-acetylglucosaminyltransferase | [g] : n4m2masn + uacgam --> h + n5m2masn + udp                                  | 2.4.1.201 | N-Glycan Biosynthesis                                  |                                                                                                                                   |
| M16N6Tg      | alpha-1,6-mannosyl-glycoprotein 6-beta-N-acetylglucosaminyltransferase | [g] : n3m2masn + uacgam --> h + n4m2masn + udp                                  | 2.4.1.155 | N-Glycan Biosynthesis                                  | 4249.1                                                                                                                            |
| M16NTg       | alpha-1,6-mannosyl-glycoprotein 2-beta-N-acetylglucosaminyltransferase | [g] : nm2masn + uacgam --> h + n2m2masn + udp                                   | 2.4.1.143 | N-Glycan Biosynthesis                                  | 4247.1                                                                                                                            |
| M4ATAer      | M4A transamidase, endoplasmic reticulum                                | [r] : m(em)3gacpail_hs + pre_prot --> gpi_sig + m(em)3gacpail_prot_hs           |           | Glycosylphosphatidylinositol (GPI)-anchor biosynthesis | ( 94005.1 and 128869.1 and 8733.1 and 10026.1 )                                                                                   |
| M4BET2er     | M4B phosphoethanolaminyl transferase, endoplasmic reticulum            | [r] : mem2emgacpail_hs + pe_hs --> dag_hs + m(em)3gacpail_hs                    |           | Glycosylphosphatidylinositol (GPI)-anchor biosynthesis | ( ( 54872.1 and 5281.1 ) or ( 5281.2 and 54872.1 ) )                                                                              |
| M4BTAer      | M4B transamidase, endoplasmic reticulum                                | [r] : mem2emgacpail_hs + pre_prot --> gpi_sig + mem2emgacpail_prot_hs           |           | Glycosylphosphatidylinositol (GPI)-anchor biosynthesis | ( 8733.1 and 10026.1 and 51604.1 and 94005.1 and 128869.1 )                                                                       |

| Abbreviation | Reaction Name                                                   | Reaction                                                                                 | E.C. #     | Pathway                                                | Gene association                                                                                     |
|--------------|-----------------------------------------------------------------|------------------------------------------------------------------------------------------|------------|--------------------------------------------------------|------------------------------------------------------------------------------------------------------|
| M4CET3er     | M4C phosphoethanolaminyl transferase, endoplasmic reticulum     | [r] : m3emgacpail_hs + pe_hs -> dag_hs + mem2emgacpail_hs                                |            | Glycosylphosphatidylinositol (GPI)-anchor biosynthesis | ( 5281.1 and 84720.1 ) or ( 5281.1 and 84720.2 ) or ( 5281.2 and 84720.1 ) or ( 84720.2 and 5281.2 ) |
| M4MPDOL_Lter | m4mpdol flippase                                                | m4mpdol_L[c] -> m4mpdol_L[r]                                                             |            | N-Glycan Biosynthesis                                  |                                                                                                      |
| M4MPDOL_Uter | m4mpdol flippase                                                | m4mpdol_U[c] -> m4mpdol_U[r]                                                             |            | N-Glycan Biosynthesis                                  |                                                                                                      |
| M7MASNBierg  | m7masnB transport from endoplasmic reticulum to Golgi apparatus | m7masnB[r] -> m7masnB[g]                                                                 |            | N-Glycan Biosynthesis                                  |                                                                                                      |
| M8MASNterg   | m8masn transport from ER to Golgi apparatus                     | m8masn[r] -> m8masn[g]                                                                   |            | N-Glycan Biosynthesis                                  |                                                                                                      |
| MACACI       | maleylacetate isomerase                                         | [c] : 4mlacac -> 4fumacac                                                                | 5.2.1.2    | Tyrosine metabolism                                    | ( 2954.1 or 2954.2 or 2954.3 )                                                                       |
| MACOXO       | 3-Methylimidazole acetaldehyde:NAD+ oxidoreductase              | [c] : 3mldz + h2o + nad -> 3mlda + (2) h + nadh                                          | 1.2.1.5    | Histidine Metabolism                                   | ( 4129.1 or 218.1 or 220.1 or 221.1 or 222.1 )                                                       |
| MALSO3tm     | Malate:sulfite antiport, mitochondrial                          | mal-L[c] + so3[m] <=> mal-L[m] + so3[c]                                                  |            | Transport, Mitochondrial                               | 1468.1                                                                                               |
| MALSO4tm     | Malate:sulfate antiport, mitochondrial                          | mal-L[c] + so4[m] <=> mal-L[m] + so4[c]                                                  |            | Transport, Mitochondrial                               | 1468.1                                                                                               |
| MALT         | alpha-glucosidase                                               | [c] : h2o + malt -> (2) glc-D                                                            | 3.2.1.20   | Starch and Sucrose Metabolism                          | 2595.1                                                                                               |
| MALTe        | alpha-glucosidase, extracellular                                | [e] : h2o + malt -> (2) glc-D                                                            | 3.2.1.20   | Starch and Sucrose Metabolism                          | 8972.1                                                                                               |
| MALTy        | alpha-glucosidase, lysosomal                                    | [l] : h2o + malt -> (2) glc-D                                                            | 3.2.1.20   | Starch and Sucrose Metabolism                          | 2548.1                                                                                               |
| MALtm        | malate transport, mitochondrial                                 | mal-L[c] + pi[m] <=> mal-L[m] + pi[c]                                                    |            | Transport, Mitochondrial                               | 1468.1                                                                                               |
| MALTSULtm    | Malate:thiosulfate antiport, mitochondrial                      | mal-L[c] + tsul[m] <=> mal-L[m] + tsul[c]                                                |            | Transport, Mitochondrial                               | 1468.1                                                                                               |
| MALT1r       | maltose transport (uniport)                                     | mal[t] <=> malt[c]                                                                       |            | Transport, Extracellular                               | 6515.1                                                                                               |
| MAN1_6B1er   | mannosidase I, endoplasmic reticulum (g1m6masnB1 producing)     | [r] : g1m7masnC + h2o -> g1m6masnB1 + man                                                |            | N-Glycan Biosynthesis                                  | 11253.1                                                                                              |
| MAN1_7Ber    | mannosidase I, endoplasmic reticulum (g1m7masnB-producing)      | [r] : g1m8masn + h2o -> g1m7masnB + man                                                  |            | N-Glycan Biosynthesis                                  | 11253.1                                                                                              |
| MAN1PT2      | mannose-1-phosphate guanylyltransferase (GDP)                   | [c] : gdp + h + man1p -> gdpmann + pi                                                    | 2.7.7.22   | Fructose and Mannose Metabolism                        | ( 29926.1 or 29925.1 or 29925.2 or 29926.2 )                                                         |
| MAN2_6B1er   | mannosidase II, endoplasmic reticulum (g1m6masnB producing)     | [r] : g1m7masnB + h2o -> g1m6masnB1 + man                                                |            | N-Glycan Biosynthesis                                  |                                                                                                      |
| MAN2_7Cer    | mannosidase II, endoplasmic reticulum (g1m7masnC producing)     | [r] : g1m8masn + h2o -> g1m7masnC + man                                                  |            | N-Glycan Biosynthesis                                  |                                                                                                      |
| MAN6P1       | mannose-6-phosphate isomerase                                   | [c] : man6p <=> f6p                                                                      | 5.3.1.8    | Fructose and Mannose Metabolism                        | 4351.1                                                                                               |
| MAN1r        | mannose transport (uniport)                                     | man[c] <=> man[l]                                                                        |            | Transport, Extracellular                               | ( 6513.1 or 6514.1 or 6515.1 )                                                                       |
| MAN4         | D-mannose transport via sodium cotransport                      | man[c] + na[l] <=> man[c] + na[l]                                                        |            | Transport, Extracellular                               | 200010.1                                                                                             |
| MANter       | mannose efflux from endoplasmic reticulum                       | man[r] -> man[c]                                                                         |            | Transport, Endoplasmic Reticular                       |                                                                                                      |
| MANtg        | mannose efflux from Golgi apparatus                             | man[g] -> man[c]                                                                         |            | Transport, Golgi Apparatus                             |                                                                                                      |
| MANty        | mannose efflux from lysosome                                    | man[l] -> man[c]                                                                         |            | Transport, Lysosomal                                   |                                                                                                      |
| MAOLNOR      | monoamine oxidase (L-Normetanephine)                            | [c] : h2o + normete-L + o2 -> 3m4hpgga + h2o2 + nb4                                      | 1.4.3.4    | Tyrosine metabolism                                    | ( 4128.1 or 4129.1 )                                                                                 |
| MAOX         | Methylamine oxidase                                             | [c] : h2o + mma + o2 -> fald + h2o2 + nb4                                                | 1.4.3.6    | Tyrosine metabolism                                    | ( 26.1 or 314.1 or 314.2 or 8639.1 )                                                                 |
| MCCCrn       | methylcrotonoyl-CoA carboxylase, mitochondrial                  | [m] : 3mb2coa + atp + hco3 -> 3mgeoa + adp + h + pi                                      | 6.4.1.4    | Valine, Leucine, and Isoleucine Metabolism             | ( 64087.1 and 56922.1 )                                                                              |
| MCD          | Malonyl-CoA Decarboxylase cytoplasmic                           | [c] : h + malcoa -> accoa + co2                                                          | 4.1.1.9    | Fatty Acid Metabolism                                  | 23417.1                                                                                              |
| MCDm         | Malonyl-CoA Decarboxylase, mitochondrial                        | [m] : h + malcoa -> accoa + co2                                                          | 4.1.1.9    | Fatty Acid Metabolism                                  | 23417.1                                                                                              |
| MCDp         | Malonyl-CoA Decarboxylase peroxisomal                           | [x] : h + malcoa -> accoa + co2                                                          | 4.1.1.9    | Fatty Acid Metabolism                                  | 23417.1                                                                                              |
| MCITS        | 2-methylcitrate synthase                                        | [c] : h2o + oaa + ppeoa -> 2mcit + coa + h                                               | 4.1.3.31   | Propanoate Metabolism                                  |                                                                                                      |
| MCLACCYSR    | 3-mercaptolactate:cysteine reductase                            | [c] : cys-L + mercplac + nad -> h + mercplaccys + nadh                                   |            | Cysteine Metabolism                                    |                                                                                                      |
| MCLOR        | 3-Mercaptolactate:NAD+ oxidoreductase                           | [c] : mercplac + nad <=> h + mercppyr + nadh                                             | 1.1.1.27   | Cysteine Metabolism                                    | ( 3948.2 or 160287.1 or 3948.1 or 55293.1 or 3939.1 or ( 3945.1 and 3939.1 ) or 3945.1 or 92483.1 )  |
| MCOATA       | Malonyl-CoA-ACP transacylase                                    | [c] : ACP + malcoa <=> coa + malACP                                                      | 2.3.1.39   | Fatty Acid Metabolism                                  | 2194.1                                                                                               |
| MCOATAm      | Malonyl-CoA-ACP transacylase, mitochondrial                     | [m] : ACP + malcoa <=> coa + malACP                                                      | 2.3.1.39   | Fatty Acid Metabolism                                  | ( 27349.1 or 27349.2 )                                                                               |
| MCPST        | 3-mercaptopyruvate sulfurtransferase                            | [c] : cyan + mercppyr -> h + pyr + tcynt                                                 | 2.8.1.2    | Cysteine Metabolism                                    | 4357.1                                                                                               |
| MDH          | malate dehydrogenase                                            | [c] : mal-L + nad <=> h + nadh + oaa                                                     | 1.1.1.37   | Citric Acid Cycle                                      | ( 130752.1 or 4190.1 )                                                                               |
| MDHm         | malate dehydrogenase, mitochondrial                             | [m] : mal-L + nad <=> h + nadh + oaa                                                     | 1.1.1.37   | Citric Acid Cycle                                      | 4191.1                                                                                               |
| MDRPD        | 5-Methylthio-5-deoxy-D-ribose 1-phosphate dehydratase           | [c] : 5mdru1p -> dkmp + h2o                                                              |            | Arginine and Proline Metabolism                        |                                                                                                      |
| ME1m         | malic enzyme (NAD), mitochondrial                               | [m] : mal-L + nad -> co2 + nadh + pyr                                                    | 1.1.1.38   | Pyruvate Metabolism                                    | 4200.1                                                                                               |
| ME2          | malic enzyme (NADP)                                             | [c] : mal-L + nadp -> co2 + nadph + pyr                                                  | 1.1.1.40   | Pyruvate Metabolism                                    | 4199.1                                                                                               |
| ME2m         | malic enzyme (NADP), mitochondrial                              | [m] : mal-L + nadp -> co2 + nadph + pyr                                                  | 1.1.1.40   | Pyruvate Metabolism                                    | ( 4200.1 or 10873.1 )                                                                                |
| MESCOALm     | mesaconate--CoA ligase (ADP-forming), mitochondrial             | [m] : atp + coa + mescon <=> adp + mescoa + pi                                           | 6.2.1.5    | CS-Branched dibasic acid metabolism                    | ( 8802.1 and 8803.1 )                                                                                |
| MESCOAS1m    | mesaconate--CoA ligase (GDP-forming)                            | [m] : coa + gtp + mescon <=> gdp + mescoa + pi                                           | 6.2.1.4    | CS-Branched dibasic acid metabolism                    | ( 8802.1 and 8801.1 )                                                                                |
| MELATN23DOX  | Melatonin:oxygen 2,3-dioxygenase (indole-decyclizing)           | [c] : melatn + o2 -> fna5moxam                                                           | 1.13.11.42 | Tryptophan metabolism                                  | 3620.1                                                                                               |
| MELATNOX     | Melatonin:NADP oxidoreductase                                   | [c] : h + melatn + nadph + o2 -> 6hoxmelatn + h2o + nadp                                 | 1.14.14.1  | Tryptophan metabolism                                  | ( 1543.1 or 1544.1 or 1545.1 or 1557.1 )                                                             |
| MEOH2        | Methanol diffusion                                              | meoh[e] <=> meoh[c]                                                                      |            | Transport, Extracellular                               |                                                                                                      |
| MEOHty       | Methanol transporter, lysosome                                  | meoh[c] <=> meoh[l]                                                                      |            | Transport, Lysosomal                                   |                                                                                                      |
| MEOHr        | Methanol transporter, endoplasmic reticulum                     | meoh[c] <=> meoh[r]                                                                      |            | Transport, Endoplasmic Reticular                       |                                                                                                      |
| MEPIVESie    | metanephine secretion via secretory vesicle (ATP driven)        | (2) atp[c] + (2) h2o[c] + (3) mepi[c] -> (2) adp[c] + (2) h[c] + (3) mepi[e] + (2) pi[c] |            | Transport, Extracellular                               |                                                                                                      |
| MERCPLACCYSi | 3-mercaptolactate-cysteine disulfide transport, extracellular   | mercplaccys[c] -> mercplaccys[e]                                                         |            | Transport, Extracellular                               |                                                                                                      |
| MESCOALm     | Mesaconyl-CoA pyruvate-lyase                                    | [m] : h2o + mescoa -> accoa + pyr                                                        | 4.1.3.25   | CS-Branched dibasic acid metabolism                    |                                                                                                      |
| METAT        | methionine adenosyltransferase                                  | [c] : atp + h2o + met-L -> amet + pi + ppi                                               | 2.5.1.6    | Methionine Metabolism                                  | ( 4143.1 or ( 27430.1 and 4144.1 ) or ( 27430.2 and 4144.1 ) )                                       |
| METLEUex     | Methionine/Leucine exchange (Met in)                            | leu-L[c] + met-L[e] -> leu-L[e] + met-L[c]                                               |            | Transport, Extracellular                               | ( 6520.1 and 8140.1 )                                                                                |
| METS         | methionine synthase                                             | [c] : 5mhf + hcys-L -> h + met-L + thf                                                   | 2.1.1.13   | Methionine Metabolism                                  | 4548.1                                                                                               |

| Abbreviation | Reaction Name                                                           | Reaction                                      | E.C. #    | Pathway                                    | Gene association                                                                            |
|--------------|-------------------------------------------------------------------------|-----------------------------------------------|-----------|--------------------------------------------|---------------------------------------------------------------------------------------------|
| MET4         | L-methionine transport in via sodium symport                            | met-L[e] + na1[e] -> met-L[c] + na1[c]        |           | Transport, Extracellular                   | (11254.1 or 6584.1 or 54407.1 or 81539.1)                                                   |
| METec        | L-methionine transport via diffusion (extracellular to cytosol)         | met-L[e] <=> met-L[c]                         |           | Transport, Extracellular                   | (8501.1 or 124935.1)                                                                        |
| MEVK1x       | mevalonate kinase (atp)                                                 | [x] : atp + mev-R -> 5pmev + adp + h          | 2.7.1.36  | Cholesterol Metabolism                     | 4598.1                                                                                      |
| MG1er        | mannosyl-oligosaccharide glucosidase, endoplasmic reticulum             | [r] : g3m8masn + h2o -> g2m8masn + glc-D      | 3.2.1.106 | N-Glycan Biosynthesis                      | 7841.1                                                                                      |
| MG2er        | mannosyl-oligosaccharide glucosidase, endoplasmic reticulum             | [r] : g2m8masn + h2o -> g1m8masn + glc-D      |           | N-Glycan Biosynthesis                      |                                                                                             |
| MG3er        | mannosyl-oligosaccharide glucosidase, endoplasmic reticulum             | [r] : g1m8masn + h2o -> glc-D + m8masn        |           | N-Glycan Biosynthesis                      |                                                                                             |
| MGACONm      | methylglutaconase, mitochondrial                                        | [m] : citmcoa-L <=> h2o + mescoa              |           | C5-Branched dibasic acid metabolism        |                                                                                             |
| MGCHrm       | methylglutaconyl-CoA hydratase (reversible), mitochondrial              | [m] : 3mgeoa + h2o <=> hmgeoa                 | 4.2.1.18  | Valine, Leucine, and Isoleucine Metabolism | 549.1                                                                                       |
| MGSA         | methylglyoxal synthase                                                  | [c] : dhap -> mthglx + pi                     | 4.2.3.3   | Pyruvate Metabolism                        |                                                                                             |
| MGSA2        | methylglyoxal synthase 2 (from g3p)                                     | [c] : g3p -> mthglx + pi                      | 4.2.3.3   | Pyruvate Metabolism                        |                                                                                             |
| MHISOR       | N-Methylhistamine:oxygen oxidoreductase (deaminating)                   | [c] : h2o + mhista + o2 -> 3mldz + h2o2 + nh4 | 1.4.3.4   | Histidine Metabolism                       | (314.1 or 314.2 or 8639.1 or 26.1)                                                          |
| MII3456PK    | inositol-1,3,4,5,6-pentakisphosphate 2-kinase                           | [c] : atp + mi13456p -> adp + h + minohp      |           | Inositol Phosphate Metabolism              |                                                                                             |
| MII3456Pn    | inositol-1,3,4,5,6-pentakisphosphate nuclear transport (diffusion)      | mi13456p[c] <=> mi13456p[n]                   |           | Transport, Nuclear                         |                                                                                             |
| MII345PKn    | inositol-1,3,4,5-triphosphate 6-kinase, nucleus                         | [n] : atp + mi1345p -> adp + h + mi13456p     |           | Inositol Phosphate Metabolism              | 253430.1                                                                                    |
| MII345PP     | inositol-1,3,4,5-triphosphate 5-phosphatase                             | [c] : h2o + mi1345p -> mi134p + pi            | 3.1.3.56  | Inositol Phosphate Metabolism              | (3633.1 or 8867.1 or 8867.2 or 56623.1 or 3632.1 or 3635.1 or 3636.1 or 27124.1 or 27124.2) |
| MII346PKn    | inositol-1,3,4,6-tetrakisphosphate 5-kinase, nucleus                    | [n] : atp + mi1346p -> adp + h + mi13456p     | 2.7.1.140 | Inositol Phosphate Metabolism              | 253430.1                                                                                    |
| MII346Pn     | 1D-myo-Inositol-1,3,4,6-tetrakisphosphate nuclear transport (diffusion) | mi1346p[c] <=> mi1346p[n]                     |           | Transport, Nuclear                         |                                                                                             |
| MII346P4P    | inositol-1,3,4-triphosphate 4-phosphatase                               | [c] : h2o + mi134p -> mi13p + pi              |           | Inositol Phosphate Metabolism              |                                                                                             |
| MII34PK      | inositol-1,3,4-triphosphate 6-kinase                                    | [c] : atp + mi134p -> adp + h + mi1346p       | 2.7.1.134 | Inositol Phosphate Metabolism              |                                                                                             |
| MII34PP      | inositol-1,3,4-triphosphate 1-phosphatase                               | [c] : h2o + mi134p -> mi34p + pi              | 3.1.3.57  | Inositol Phosphate Metabolism              | 3628.1                                                                                      |
| MII3PP       | inositol-1,3-bisphosphate 3-phosphatase                                 | [c] : h2o + mi13p -> mi1p-D + pi              | 3.1.3.64  | Inositol Phosphate Metabolism              |                                                                                             |
| MII456PKn    | inositol-1,4,5,6- tetrakisphosphate 3-kinase, nucleus                   | [n] : atp + mi1456p -> adp + h + mi13456p     | 2.7.1.151 | Inositol Phosphate Metabolism              | 253430.1                                                                                    |
| MII456PKn    | inositol-1,4,5-triphosphate 6-kinase, nucleus                           | [n] : atp + mi145p -> adp + h + mi1456p       | 2.7.1.151 | Inositol Phosphate Metabolism              | 253430.1                                                                                    |
| MII45PK      | inositol-1,4,5-triphosphate 3-kinase                                    | [c] : atp + mi145p -> adp + h + mi1345p       | 2.7.1.127 | Inositol Phosphate Metabolism              | (3706.1 or 3707.1 or 80271.1)                                                               |
| MII45PKn     | inositol-1,4,5-triphosphate 3-kinase, nucleus                           | [n] : atp + mi145p -> adp + h + mi1345p       | 2.7.1.127 | Inositol Phosphate Metabolism              | 253430.1                                                                                    |
| MII45PP      | inositol-1,4,5-triphosphate 5-phosphatase                               | [c] : h2o + mi145p -> mi14p + pi              | 3.1.3.56  | Inositol Phosphate Metabolism              | (3633.1 or 8867.1 or 8867.2 or 56623.1 or 3632.1 or 3635.1 or 3636.1 or 27124.1 or 27124.2) |
| MII4P4P      | inositol-1,4-bisphosphate 4-phosphatase                                 | [c] : h2o + mi14p -> mi1p-D + pi              |           | Inositol Phosphate Metabolism              |                                                                                             |
| MII4PP       | inositol-1,4-bisphosphate 1-phosphatase                                 | [c] : h2o + mi14p -> mi4p-D + pi              | 3.1.3.57  | Inositol Phosphate Metabolism              | 3628.1                                                                                      |
| MII4Pn       | inositol-1,4-bisphosphate nuclear transport (diffusion)                 | mi14p[c] <=> mi14p[n]                         |           | Transport, Nuclear                         |                                                                                             |
| MIIp-Dn      | inositol-1-phosphate nuclear transport (diffusion)                      | mi1p-D[c] <=> mi1p-D[n]                       |           | Transport, Nuclear                         |                                                                                             |
| MII1PP       | myo-inositol-1-phosphatase                                              | [c] : h2o + mi1p-D -> inost + pi              | 3.1.3.25  | Inositol Phosphate Metabolism              | (3612.1 or 3613.1)                                                                          |
| MII1PS       | myo-Inositol-1-phosphate synthase                                       | [c] : g6p -> mi1p-D                           | 5.5.1.4   | Inositol Phosphate Metabolism              | 51477.1                                                                                     |
| MII3456PK    | inositol-3,4,5,6-tetrakisphosphate 1-kinase                             | [c] : atp + mi3456p -> adp + h + mi13456p     | 2.7.1.134 | Inositol Phosphate Metabolism              |                                                                                             |
| MII34PP      | inositol-3,4-bisphosphate 4-phosphatase                                 | [c] : h2o + mi34p -> mi3p-D + pi              | 3.1.3.66  | Inositol Phosphate Metabolism              | (3631.2 or 8821.1 or 3631.1)                                                                |
| MII3PP       | myo-inositol 3-phosphatase                                              | [c] : h2o + mi3p-D -> inost + pi              | 3.1.3.25  | Inositol Phosphate Metabolism              | (3612.1 or 3613.1)                                                                          |
| MII4PP       | myo-inositol 4-phosphatase                                              | [c] : h2o + mi4p-D -> inost + pi              | 3.1.3.25  | Inositol Phosphate Metabolism              | (3612.1 or 3613.1)                                                                          |
| MIICTDr      | 2-methylisocitrate dehydratase                                          | [c] : 2mccac + h2o <=> micit                  | 4.2.1.99  | Propanoate Metabolism                      |                                                                                             |
| MINOHPn      | inositol hexakisphosphate nuclear transport (diffusion)                 | minohp[c] <=> minohp[n]                       |           | Transport, Nuclear                         |                                                                                             |
| MLTG1        | Maltodextrin glucosidase (maltotriose)                                  | [c] : h2o + maltr -> glc-D + malt             |           | Starch and Sucrose Metabolism              | 2595.1                                                                                      |
| MLTG1e       | Maltodextrin glucosidase (maltotriose), extracellular                   | [e] : h2o + maltr -> glc-D + malt             |           | Starch and Sucrose Metabolism              | 8972.1                                                                                      |
| MLTG1ly      | Maltodextrin glucosidase (maltotriose), lysosome                        | [l] : h2o + maltr -> glc-D + malt             |           | Starch and Sucrose Metabolism              | 2548.1                                                                                      |
| MMSag        | mannosyl-oligosaccharide 1,2-alpha-mannosidase, Golgi apparatus         | [g] : h2o + m5masn -> m4masn + man            | 3.2.1.113 | N-Glycan Biosynthesis                      | (4121.1 or 10905.1 or 57134.1)                                                              |
| MMSbg        | mannosyl-oligosaccharide 1,2-alpha-mannosidase, Golgi apparatus         | [g] : h2o + m5masnB1 -> m4masn + man          | 3.2.1.113 | N-Glycan Biosynthesis                      | (4121.1 or 10905.1 or 57134.1)                                                              |
| MMScg        | mannosyl-oligosaccharide 1,2-alpha-mannosidase, Golgi apparatus         | [g] : h2o + m5masnB2 -> m4masn + man          | 3.2.1.113 | N-Glycan Biosynthesis                      | (10905.1 or 57134.1 or 4121.1)                                                              |
| MM6ag        | mannosyl-oligosaccharide 1,2-alpha-mannosidase, Golgi apparatus         | [g] : h2o + m6masnA -> m5masn + man           | 3.2.1.113 | N-Glycan Biosynthesis                      | 57134.1                                                                                     |
| MM6B1ag      | mannosyl-oligosaccharide 1,2-alpha-mannosidase, Golgi apparatus         | [g] : h2o + m6masnB1 -> m5masnB1 + man        | 3.2.1.113 | N-Glycan Biosynthesis                      | (4121.1 or 10905.1 or 57134.1)                                                              |
| MM6B1bg      | mannosyl-oligosaccharide 1,2-alpha-mannosidase, Golgi apparatus         | [g] : h2o + m6masnB2 -> m5masnB1 + man        | 3.2.1.113 | N-Glycan Biosynthesis                      | (4121.1 or 57134.1 or 10905.1)                                                              |
| MM6B2g       | mannosyl-oligosaccharide 1,2-alpha-mannosidase, Golgi apparatus         | [g] : h2o + m6masnB2 -> m5masnB2 + man        | 3.2.1.113 | N-Glycan Biosynthesis                      | (10905.1 or 57134.1 or 4121.1)                                                              |
| MM6bg        | mannosyl-oligosaccharide 1,2-alpha-mannosidase, Golgi apparatus         | [g] : h2o + m6masnC -> m5masnC + man          | 3.2.1.113 | N-Glycan Biosynthesis                      | (4121.1 or 10905.1 or 57134.1)                                                              |
| MM7Ag        | mannosyl-oligosaccharide 1,2-alpha-mannosidase, Golgi apparatus         | [g] : h2o + m7masnA -> m6masnA + man          | 3.2.1.113 | N-Glycan Biosynthesis                      | 57134.1                                                                                     |
| MM7B1g       | mannosyl-oligosaccharide 1,2-alpha-mannosidase, Golgi apparatus         | [g] : h2o + m7masnB -> m6masnB1 + man         | 3.2.1.113 | N-Glycan Biosynthesis                      | (4121.1 or 10905.1 or 57134.1)                                                              |
| MM7B2g       | mannosyl-oligosaccharide 1,2-alpha-mannosidase, Golgi apparatus         | [g] : h2o + m7masnB -> m6masnB2 + man         | 3.2.1.113 | N-Glycan Biosynthesis                      | (4121.1 or 10905.1 or 57134.1)                                                              |
| MM7Cag       | mannosyl-oligosaccharide 1,2-alpha-mannosidase, Golgi apparatus         | [g] : h2o + m7masnA -> m6masnC + man          | 3.2.1.113 | N-Glycan Biosynthesis                      | (4121.1 or 10905.1 or 57134.1)                                                              |
| MM7Cbg       | mannosyl-oligosaccharide 1,2-alpha-mannosidase, Golgi apparatus         | [g] : h2o + m7masnC -> m6masnC + man          | 3.2.1.113 | N-Glycan Biosynthesis                      | (4121.1 or 10905.1 or 57134.1)                                                              |
| MM8Ag        | mannosyl-oligosaccharide 1,2-alpha-mannosidase, Golgi apparatus         | [g] : h2o + m8masn -> m7masnA + man           | 3.2.1.113 | N-Glycan Biosynthesis                      | (4121.1 or 10905.1 or 57134.1)                                                              |

| Abbreviation | Reaction Name                                                                   | Reaction                                              | E.C. #    | Pathway                                    | Gene association                                                 |
|--------------|---------------------------------------------------------------------------------|-------------------------------------------------------|-----------|--------------------------------------------|------------------------------------------------------------------|
| MM8Ber       | mannosyl-oligosaccharide 1,2-alpha-mannosidase, endoplasmic reticulum           | [r] : h2o + m8masn -> m7masnB + man                   | 3.2.1.113 | N-Glycan Biosynthesis                      | 11253.1                                                          |
| MM8Cg        | mannosyl-oligosaccharide 1,2-alpha-mannosidase, Golgi apparatus                 | [g] : h2o + m8masn -> m7masnC + man                   | 3.2.1.113 | N-Glycan Biosynthesis                      | (4121.1 or 10905.1 or 57134.1)                                   |
| MMCD         | Methylmalonyl-CoA decarboxylase                                                 | [c] : h + mmcoa-S -> co2 + ppcoa                      | 4.1.1.41  | Valine, Leucine, and Isoleucine Metabolism | 23417.1                                                          |
| MMCDm        | Methylmalonyl-CoA decarboxylase, mitochondrial                                  | [m] : h + mmcoa-S -> co2 + ppcoa                      | 4.1.1.41  | Valine, Leucine, and Isoleucine Metabolism | 23417.1                                                          |
| MMCDp        | Methylmalonyl-CoA decarboxylase, peroxisomal                                    | [x] : h + mmcoa-S -> co2 + ppcoa                      | 4.1.1.41  | Valine, Leucine, and Isoleucine Metabolism | 23417.1                                                          |
| MMEin        | methylmalonyl-CoA epimerase/racemase                                            | [m] : mmcoa-R <=> mmcoa-S                             | 5.1.99.1  | Valine, Leucine, and Isoleucine Metabolism | 84693.1                                                          |
| MMMm         | methylmalonyl-CoA mutase                                                        | [m] : mmcoa-R <=> succoa                              | 5.4.99.2  | Valine, Leucine, and Isoleucine Metabolism | 4594.1                                                           |
| MMSAD1m      | methylmalonate-semialdehyde dehydrogenase                                       | [m] : 2mop + coa + nad -> co2 + nadh + ppcoa          | 1.2.1.27  | Valine, Leucine, and Isoleucine Metabolism | 4329.1                                                           |
| MMSAD3m      | methylmalonate-semialdehyde dehydrogenase (malonic semialdehyde), mitochondrial | [m] : coa + msa + nad -> accoa + co2 + nadh           | 1.2.1.27  | Propanoate Metabolism                      | 4329.1                                                           |
| MMSADm       | malonate-semialdehyde dehydrogenase (acetylating), mitochondrial                | [m] : 2mop + coa + nad -> h + mmcoa-R + nadh          | 1.2.1.18  | Valine, Leucine, and Isoleucine Metabolism |                                                                  |
| MOGAT        | monoacylglycerol acyltransferase                                                | [c] : Rtotalcoa + imag_hs -> coa + dag_hs             |           | Triacylglycerol Synthesis                  | (116255.1 or 80168.1)                                            |
| MTAP         | 5'-methylthioadenosine phosphorylase                                            | [c] : 5mta + pi -> 5mdr1p + ade                       | 2.4.2.28  | Arginine and Proline Metabolism            | 4507.1                                                           |
| MTHFC        | methylenetetrahydrofolate cyclohydrolase                                        | [c] : h2o + methf <=> 10thf + h                       | 3.5.4.9   | Folate Metabolism                          | (4522.1 or 80068.1 or 285216.1)                                  |
| MTHFCm       | methylenetetrahydrofolate cyclohydrolase, mitochondrial                         | [m] : h2o + methf <=> 10thf + h                       | 3.5.4.9   | Folate Metabolism                          | (25902.1 or 10797.1)                                             |
| MTHFD        | methylenetetrahydrofolate dehydrogenase (NADP)                                  | [c] : mlthf + nadp <=> methf + nadph                  | 1.5.1.5   | Folate Metabolism                          | 4522.1                                                           |
| MTHFD2       | methylenetetrahydrofolate dehydrogenase (NAD)                                   | [c] : mlthf + nad <=> methf + nadh                    | 1.5.1.5   | Folate Metabolism                          | (285216.1 or 80068.1)                                            |
| MTHFD2m      | methylenetetrahydrofolate dehydrogenase (NAD), mitochondrial                    | [m] : mlthf + nad <=> methf + nadh                    | 1.5.1.5   | Folate Metabolism                          | 10797.1                                                          |
| MTHFDm       | methylenetetrahydrofolate dehydrogenase (NADP), mitochondrial                   | [m] : mlthf + nadp <=> methf + nadph                  | 1.5.1.5   | Folate Metabolism                          | (25902.1 or 10797.1)                                             |
| MTHFR3       | 5,10-methylenetetrahydrofolatereductase (NADPH)                                 | [c] : (2) h + mlthf + nadph -> 5mthf + nadp           | 1.5.1.20  | Folate Metabolism                          | 4524.1                                                           |
| MTHGXLt      | Methylglyoxal transport (cytosol to extracellular)                              | mthgxl[c] -> mthgxl[c]                                |           | Transport, Extracellular                   |                                                                  |
| MTRI         | 5-methylthioribose-1-phosphate isomerase                                        | [c] : 5mdr1p <=> 5mdr1p                               | 5.3.1.23  | Arginine and Proline Metabolism            |                                                                  |
| N2M2MASNt    | n2m2masn transport, Golgi to extracellular                                      | n2m2masn[g] -> n2m2masn[e]                            |           | Transport, Extracellular                   |                                                                  |
| N2M2MASNly   | n2m2masn transport, extracellular to lysosome                                   | n2m2masn[e] -> n2m2masn[l]                            |           | Transport, Lysosomal                       |                                                                  |
| N3Tg         | N-acetylgalactosamine 3-beta-galactosyltransferase, Golgi apparatus             | [g] : Tn_antigen + udpgal -> Tn_antigen + h + udp     | 2.4.1.122 | O-Glycan Biosynthesis                      | 56913.1                                                          |
| N4Tg         | N-acetylgalactosamine 4-beta-galactosyltransferase, Golgi apparatus             | [g] : core6 + udpgal -> f1a + h + udp                 |           | O-Glycan Biosynthesis                      |                                                                  |
| NABTNO       | N4-Acetylaminobutanal:NAD+ oxidoreductase                                       | [c] : h2o + n4abutan + nad -> 4aabutan + (2) h + nadh | 1.2.1.3   | Arginine and Proline Metabolism            | (216.1 or 223.1 or 224.1 or 501.1 or 8854.1 or 8854.2 or 8854.3) |
| NABTNOm      | N4-Acetylaminobutanal:NAD+ oxidoreductase (m)                                   | [m] : h2o + n4abutan + nad -> 4aabutan + (2) h + nadh | 1.2.1.3   | Arginine and Proline Metabolism            | (217.1 or 219.1 or 8659.1)                                       |
| NACASPAH     | N-Acetyl-L-aspartate amidohydrolase                                             | [c] : Nacasp + h2o -> ac + asp-L                      | 3.5.1.15  | Alanine and Aspartate Metabolism           | (443.1 or 91703.1)                                               |
| NACASPt      | N-acetyl-L-aspartate transport (mitochondria to cytosol)                        | Nacasp[m] -> Nacasp[c]                                |           | Transport, Mitochondrial                   |                                                                  |
| NACHEX10ly   | beta-N-acetylhexosaminidase, lysosomal                                          | [l] : (2) h2o + ksi_deg7 -> (2) acgam + ksi_deg8      | 3.2.1.52  | Keratan sulfate degradation                | (3074.1 or (3074.1 and 3073.1) or 3073.1)                        |
| NACHEX11ly   | beta-N-acetylhexosaminidase, lysosomal                                          | [l] : h2o + ksi_deg10 -> acgam + ksi_deg11            | 3.2.1.52  | Keratan sulfate degradation                | (3073.1 or 3074.1 or (3074.1 and 3073.1))                        |
| NACHEX12ly   | beta-N-acetylhexosaminidase, lysosomal                                          | [l] : h2o + ksi_deg13 -> acgam + ksi_deg14            | 3.2.1.52  | Keratan sulfate degradation                | (3074.1 or (3074.1 and 3073.1) or 3073.1)                        |
| NACHEX13ly   | beta-N-acetylhexosaminidase, lysosomal                                          | [l] : h2o + ksi_deg16 -> acgam + ksi_deg17            | 3.2.1.52  | Keratan sulfate degradation                | (3074.1 or (3074.1 and 3073.1) or 3073.1)                        |
| NACHEX14ly   | beta-N-acetylhexosaminidase, lysosomal                                          | [l] : h2o + ksi_deg19 -> acgam + ksi_deg20            | 3.2.1.52  | Keratan sulfate degradation                | ((3074.1 and 3073.1) or 3073.1 or 3074.1)                        |
| NACHEX15ly   | beta-N-acetylhexosaminidase, lysosomal                                          | [l] : h2o + ksi_deg22 -> acgam + ksi_deg23            | 3.2.1.52  | Keratan sulfate degradation                | ((3074.1 and 3073.1) or 3073.1 or 3074.1)                        |
| NACHEX16ly   | beta-N-acetylhexosaminidase, lysosomal                                          | [l] : h2o + ksi_deg25 -> acgam + ksi_deg26            | 3.2.1.52  | Keratan sulfate degradation                | ((3074.1 and 3073.1) or 3073.1 or 3074.1)                        |
| NACHEX17ly   | beta-N-acetylhexosaminidase, lysosomal                                          | [l] : h2o + ksi_deg28 -> acgam + ksi_deg29            | 3.2.1.52  | Keratan sulfate degradation                | (3074.1 or (3074.1 and 3073.1) or 3073.1)                        |
| NACHEX18ly   | beta-N-acetylhexosaminidase, lysosomal                                          | [l] : h2o + ksi_deg31 -> acgam + ksi_deg32            | 3.2.1.52  | Keratan sulfate degradation                | (3073.1 or 3074.1 or (3074.1 and 3073.1))                        |
| NACHEX19ly   | beta-N-acetylhexosaminidase, lysosomal                                          | [l] : h2o + ksi_deg34 -> acgam + ksi_deg35            | 3.2.1.52  | Keratan sulfate degradation                | (3074.1 or 3073.1 or (3074.1 and 3073.1))                        |
| NACHEX1ly    | beta-N-acetylhexosaminidase, lysosomal                                          | [l] : cs_a_deg1 + h2o -> acgal + cs_a_deg2            | 3.2.1.52  | Chondroitin sulfate degradation            | ((3074.1 and 3073.1) or 3074.1 or 3073.1)                        |
| NACHEX20ly   | beta-N-acetylhexosaminidase, lysosomal                                          | [l] : h2o + ksi_deg37 -> acgam + ksi_deg38            | 3.2.1.52  | Keratan sulfate degradation                | ((3074.1 and 3073.1) or 3073.1 or 3074.1)                        |
| NACHEX21ly   | beta-N-acetylhexosaminidase, lysosomal                                          | [l] : h2o + ksi_deg39 -> acgam + ksi_deg40            | 3.2.1.52  | Keratan sulfate degradation                | (3074.1 or (3074.1 and 3073.1) or 3073.1)                        |
| NACHEX22ly   | beta-N-acetylhexosaminidase, lysosomal                                          | [l] : h2o + ksi_deg41 -> acgam + m2mm                 | 3.2.1.52  | Keratan sulfate degradation                | (3074.1 or 3073.1 or (3074.1 and 3073.1))                        |
| NACHEX23ly   | beta-N-acetylhexosaminidase, lysosomal                                          | [l] : h2o + ksi_core2_deg4 -> acgam + ksi_core2_deg5  | 3.2.1.52  | Keratan sulfate degradation                | ((3074.1 and 3073.1) or 3074.1 or 3073.1)                        |

| Abbreviation | Reaction Name                            | Reaction                                                                  | E.C. #   | Pathway                         | Gene association                              |
|--------------|------------------------------------------|---------------------------------------------------------------------------|----------|---------------------------------|-----------------------------------------------|
| NACHEX24ly   | beta-N-acetylhexosaminidase, lysosomal   | [I] : h2o + ksii_core2_deg7 --> acgal + ksii_core2_deg8                   | 3.2.1.52 | Keratan sulfate degradation     | ( 3074.1 or ( 3074.1 and 3073.1 ) or 3073.1 ) |
| NACHEX25ly   | beta-N-acetylhexosaminidase, lysosomal   | [I] : h2o + ksii_core2_deg9 --> acgal + f1a                               | 3.2.1.52 | Keratan sulfate degradation     | ( ( 3074.1 and 3073.1 ) or 3074.1 or 3073.1 ) |
| NACHEX26ly   | beta-N-acetylhexosaminidase, lysosomal   | [I] : (2) h2o + ksii_core4_deg4 --> (2) acgal + ksii_core2_deg5           | 3.2.1.52 | Keratan sulfate degradation     | ( ( 3074.1 and 3073.1 ) or 3074.1 or 3073.1 ) |
| NACHEX27ly   | beta-N-acetylhexosaminidase, lysosomal   | [I] : h2o + ha_deg1 --> acgal + ha_pre1                                   | 3.2.1.52 | Hyaluronan Metabolism           | ( ( 3074.1 and 3073.1 ) or 3074.1 or 3073.1 ) |
| NACHEX2ly    | beta-N-acetylhexosaminidase, lysosomal   | [I] : cs_a_deg4 + h2o --> acgal + cs_a_deg5                               | 3.2.1.52 | Chondroitin sulfate degradation | ( ( 3074.1 and 3073.1 ) or 3074.1 or 3073.1 ) |
| NACHEX3ly    | beta-N-acetylhexosaminidase, lysosomal   | [I] : cs_b_deg1 + h2o --> acgal + cs_b_deg2                               | 3.2.1.52 | Chondroitin sulfate degradation | (3073.1 or 3074.1 or ( 3074.1 and 3073.1 ) )  |
| NACHEX4ly    | beta-N-acetylhexosaminidase, lysosomal   | [I] : cs_c_deg1 + h2o --> acgal + cs_c_deg2                               | 3.2.1.52 | Chondroitin sulfate degradation | (3073.1 or 3074.1 or ( 3074.1 and 3073.1 ) )  |
| NACHEX5ly    | beta-N-acetylhexosaminidase, lysosomal   | [I] : cs_c_deg4 + h2o --> acgal + cs_c_deg5                               | 3.2.1.52 | Chondroitin sulfate degradation | ( 3073.1 or 3074.1 or ( 3074.1 and 3073.1 ) ) |
| NACHEX6ly    | beta-N-acetylhexosaminidase, lysosomal   | [I] : cs_d_deg1 + h2o --> acgal + cs_d_deg2                               | 3.2.1.52 | Chondroitin sulfate degradation | ( ( 3074.1 and 3073.1 ) or 3073.1 or 3074.1 ) |
| NACHEX7ly    | beta-N-acetylhexosaminidase, lysosomal   | [I] : cs_d_deg5 + h2o --> acgal + cs_d_deg6                               | 3.2.1.52 | Chondroitin sulfate degradation | ( ( 3074.1 and 3073.1 ) or 3073.1 or 3074.1 ) |
| NACHEX8ly    | beta-N-acetylhexosaminidase, lysosomal   | [I] : cs_e_deg2 + h2o --> acgal + cs_e_deg3                               | 3.2.1.52 | Chondroitin sulfate degradation | ( ( 3074.1 and 3073.1 ) or 3073.1 or 3074.1 ) |
| NACHEX9ly    | beta-N-acetylhexosaminidase, lysosomal   | [I] : cs_e_deg6 + h2o --> acgal + cs_e_deg7                               | 3.2.1.52 | Chondroitin sulfate degradation | ( ( 3074.1 and 3073.1 ) or 3073.1 or 3074.1 ) |
| NACHEXA10ly  | beta-N-acetylhexosaminidase A, lysosomal | [I] : (2) h2o + ksi_deg9 --> acgal + h + ksi_deg11 + so4                  |          | Keratan sulfate degradation     | ( 3073.1 or ( 3074.1 and 3073.1 ) )           |
| NACHEXA11ly  | beta-N-acetylhexosaminidase A, lysosomal | [I] : (2) h2o + ksi_deg12 --> acgal + h + ksi_deg14 + so4                 |          | Keratan sulfate degradation     | ( 3073.1 or ( 3074.1 and 3073.1 ) )           |
| NACHEXA12ly  | beta-N-acetylhexosaminidase A, lysosomal | [I] : (2) h2o + ksi_deg15 --> acgal + h + ksi_deg17 + so4                 |          | Keratan sulfate degradation     | ( 3073.1 or ( 3074.1 and 3073.1 ) )           |
| NACHEXA13ly  | beta-N-acetylhexosaminidase A, lysosomal | [I] : (2) h2o + ksi_deg18 --> acgal + h + ksi_deg20 + so4                 |          | Keratan sulfate degradation     | ( 3073.1 or ( 3074.1 and 3073.1 ) )           |
| NACHEXA14ly  | beta-N-acetylhexosaminidase A, lysosomal | [I] : (2) h2o + ksi_deg21 --> acgal + h + ksi_deg23 + so4                 |          | Keratan sulfate degradation     | ( 3073.1 or ( 3074.1 and 3073.1 ) )           |
| NACHEXA15ly  | beta-N-acetylhexosaminidase A, lysosomal | [I] : (2) h2o + ksi_deg24 --> acgal + h + ksi_deg26 + so4                 |          | Keratan sulfate degradation     | ( 3073.1 or ( 3074.1 and 3073.1 ) )           |
| NACHEXA16ly  | beta-N-acetylhexosaminidase A, lysosomal | [I] : (2) h2o + ksi_deg27 --> acgal + h + ksi_deg29 + so4                 |          | Keratan sulfate degradation     | ( 3073.1 or ( 3074.1 and 3073.1 ) )           |
| NACHEXA17ly  | beta-N-acetylhexosaminidase A, lysosomal | [I] : (2) h2o + ksi_deg30 --> acgal + h + ksi_deg32 + so4                 |          | Keratan sulfate degradation     | ( 3073.1 or ( 3074.1 and 3073.1 ) )           |
| NACHEXA18ly  | beta-N-acetylhexosaminidase A, lysosomal | [I] : (2) h2o + ksi_deg33 --> acgal + h + ksi_deg35 + so4                 |          | Keratan sulfate degradation     | ( 3073.1 or ( 3074.1 and 3073.1 ) )           |
| NACHEXA19ly  | beta-N-acetylhexosaminidase A, lysosomal | [I] : (2) h2o + ksi_deg36 --> acgal + h + ksi_deg38 + so4                 |          | Keratan sulfate degradation     | ( 3073.1 or ( 3074.1 and 3073.1 ) )           |
| NACHEXA1ly   | beta-N-acetylhexosaminidase A, lysosomal | [I] : cs_a + (2) h2o --> acgal + cs_a_deg2 + h + so4                      |          | Chondroitin sulfate degradation | ( 3073.1 or ( 3074.1 and 3073.1 ) )           |
| NACHEXA20ly  | beta-N-acetylhexosaminidase A, lysosomal | [I] : (2) h2o + ksii_core2_deg3 --> acgal + h + ksii_core2_deg5 + so4     |          | Keratan sulfate degradation     | ( 3073.1 or ( 3074.1 and 3073.1 ) )           |
| NACHEXA21ly  | beta-N-acetylhexosaminidase A, lysosomal | [I] : (2) h2o + ksii_core2_deg6 --> acgal + h + ksii_core2_deg8 + so4     |          | Keratan sulfate degradation     | ( 3073.1 or ( 3074.1 and 3073.1 ) )           |
| NACHEXA22ly  | beta-N-acetylhexosaminidase A, lysosomal | [I] : (3) h2o + ksii_core4_deg3 --> (2) acgal + h + ksii_core2_deg5 + so4 |          | Keratan sulfate degradation     | ( 3073.1 or ( 3074.1 and 3073.1 ) )           |
| NACHEXA2ly   | beta-N-acetylhexosaminidase A, lysosomal | [I] : cs_b + (2) h2o --> acgal + cs_b_deg2 + h + so4                      |          | Chondroitin sulfate degradation | ( 3073.1 or ( 3074.1 and 3073.1 ) )           |
| NACHEXA3ly   | beta-N-acetylhexosaminidase A, lysosomal | [I] : cs_c + (2) h2o --> acgal + cs_c_deg2 + h + so4                      |          | Chondroitin sulfate degradation | ( 3073.1 or ( 3074.1 and 3073.1 ) )           |
| NACHEXA4ly   | beta-N-acetylhexosaminidase A, lysosomal | [I] : cs_c_deg3 + (2) h2o --> acgal + cs_c_deg5 + h + so4                 |          | Chondroitin sulfate degradation | ( 3073.1 or ( 3074.1 and 3073.1 ) )           |
| NACHEXA5ly   | beta-N-acetylhexosaminidase A, lysosomal | [I] : cs_d + (2) h2o --> acgal + cs_d_deg2 + h + so4                      |          | Chondroitin sulfate degradation | ( 3073.1 or ( 3074.1 and 3073.1 ) )           |
| NACHEXA6ly   | beta-N-acetylhexosaminidase A, lysosomal | [I] : cs_d_deg4 + (2) h2o --> acgal + cs_d_deg6 + h + so4                 |          | Chondroitin sulfate degradation | ( 3073.1 or ( 3074.1 and 3073.1 ) )           |
| NACHEXA7ly   | beta-N-acetylhexosaminidase A, lysosomal | [I] : cs_e + (3) h2o --> acgal + cs_e_deg3 + (2) h + (2) so4              |          | Chondroitin sulfate degradation | ( 3073.1 or ( 3074.1 and 3073.1 ) )           |
| NACHEXA8ly   | beta-N-acetylhexosaminidase A, lysosomal | [I] : cs_e_deg4 + (3) h2o --> acgal + cs_e_deg7 + (2) h + (2) so4         |          | Chondroitin sulfate degradation | ( 3073.1 or ( 3074.1 and 3073.1 ) )           |
| NACHEXA9ly   | beta-N-acetylhexosaminidase A, lysosomal | [I] : (3) h2o + ksi_deg6 --> (2) acgal + h + ksi_deg8 + so4               |          | Keratan sulfate degradation     | ( 3073.1 or ( 3074.1 and 3073.1 ) )           |
| NACUP        | Nicotinic acid uptake                    | nae[e] --> nae[c]                                                         |          | Transport, Extracellular        |                                               |

| Abbreviation | Reaction Name                                         | Reaction                                                                                  | E.C. #   | Pathway                          | Gene association                                                                                                                                                                                                                                                                                                                                                                                                                                                                                                                                                                                                                                                                                                                                                                                                                                              |
|--------------|-------------------------------------------------------|-------------------------------------------------------------------------------------------|----------|----------------------------------|---------------------------------------------------------------------------------------------------------------------------------------------------------------------------------------------------------------------------------------------------------------------------------------------------------------------------------------------------------------------------------------------------------------------------------------------------------------------------------------------------------------------------------------------------------------------------------------------------------------------------------------------------------------------------------------------------------------------------------------------------------------------------------------------------------------------------------------------------------------|
| NADH2-u10m   | NADH dehydrogenase, mitochondrial                     | (5) h[m] + nadh[m] + q10[m] --> (4) h[c] + nad[m] + q10h2[m]                              | 1.6.99.3 | Oxidative Phosphorylation        | ( 4704.1 and 4535.1 and 4722.1 and 4705.1 and 4716.1 and 4723.1 and 4698.1 and 4702.1 and 7991.1 and 4694.1 and 4695.1 and 126328.1 and 4719.1 and 4710.1 and 4540.1 and 51079.1 and 4720.1 and 4538.1 and 4711.1 and 4709.1 and 4715.1 and 4708.1 and 4714.1 and 4539.1 and 55967.1 and 4718.1 and 4536.1 and 4541.1 and 4706.1 and 4731.1 and 4537.1 and 4696.1 and 374291.1 and 4713.1 and 4707.1 and 4728.1 and 4717.1 and 4725.1 and 4701.1 and 4729.1 and 4697.1 and 4712.2 and 4724.1 ) or ( 4726.1 and 55967.1 and 4697.1 and 4696.1 and 7991.1 and 4694.1 and 4719.1 and 4710.1 and 4540.1 and 4538.1 and 4711.1 and 4729.1 and 4535.1 and 4713.1 and 4707.1 and 4716.1 and 4701.1 and 4724.1 and 4536.1 and 4537.1 and 4731.2 and 4698.1 and 4709.1 and 4700.1 and 4704.1 and 4728.1 and 126328.1 and 4712.1 and 4539.1 and 374291.1 and 4722.1 and |
| NADHtpu      | NADH transporter, peroxisome                          | nadh[c] --> nadh[x]                                                                       |          | Transport, Peroxisomal           |                                                                                                                                                                                                                                                                                                                                                                                                                                                                                                                                                                                                                                                                                                                                                                                                                                                               |
| NADHtru      | NADH transporter, endoplasmic reticulum               | nadh[c] --> nadh[r]                                                                       |          | Transport, Endoplasmic Reticular |                                                                                                                                                                                                                                                                                                                                                                                                                                                                                                                                                                                                                                                                                                                                                                                                                                                               |
| NADK         | NAD kinase                                            | [c] : atp + nad --> adp + h + nadp                                                        | 2.7.1.23 | NAD Metabolism                   | 65220.1                                                                                                                                                                                                                                                                                                                                                                                                                                                                                                                                                                                                                                                                                                                                                                                                                                                       |
| NADN         | NAD nucleosidase                                      | [c] : h2o + nad --> adprpb + h + ncam                                                     | 3.2.2.5  | NAD Metabolism                   |                                                                                                                                                                                                                                                                                                                                                                                                                                                                                                                                                                                                                                                                                                                                                                                                                                                               |
| NADNe        | NAD nucleosidase,extracellular                        | [e] : h2o + nad --> adprpb + h + ncam                                                     | 3.2.2.5  | NAD Metabolism                   | 952.1                                                                                                                                                                                                                                                                                                                                                                                                                                                                                                                                                                                                                                                                                                                                                                                                                                                         |
| NADPHtru     | NADPH transporter, endoplasmic reticulum              | nadph[c] --> nadph[r]                                                                     |          | Transport, Endoplasmic Reticular |                                                                                                                                                                                                                                                                                                                                                                                                                                                                                                                                                                                                                                                                                                                                                                                                                                                               |
| NADPHtpu     | NADPH transporter, peroxisome                         | nadph[c] --> nadph[x]                                                                     |          | Transport, Peroxisomal           |                                                                                                                                                                                                                                                                                                                                                                                                                                                                                                                                                                                                                                                                                                                                                                                                                                                               |
| NADPN        | NADP nucleosidase                                     | [c] : h2o + nadp --> adprpb + h + ncam                                                    | 3.2.2.6  | NAD Metabolism                   |                                                                                                                                                                                                                                                                                                                                                                                                                                                                                                                                                                                                                                                                                                                                                                                                                                                               |
| NADPNe       | NADP nucleosidase,extracellular                       | [e] : h2o + nadp --> adprpb + h + ncam                                                    | 3.2.2.6  | NAD Metabolism                   | 952.1                                                                                                                                                                                                                                                                                                                                                                                                                                                                                                                                                                                                                                                                                                                                                                                                                                                         |
| NADPtru      | NADP transporter, endoplasmic reticulum               | nadp[r] --> nadp[c]                                                                       |          | Transport, Endoplasmic Reticular |                                                                                                                                                                                                                                                                                                                                                                                                                                                                                                                                                                                                                                                                                                                                                                                                                                                               |
| NADPtpu      | NADP transporter, peroxisome                          | nadp[x] --> nadp[c]                                                                       |          | Transport, Peroxisomal           |                                                                                                                                                                                                                                                                                                                                                                                                                                                                                                                                                                                                                                                                                                                                                                                                                                                               |
| NADS2        | NAD synthase (glutamine-hydrolysing)                  | [c] : atp + dnad + glu-L + h2o --> amp + glu-L + h + nad + ppi                            | 6.3.5.1  | NAD Metabolism                   | 55191.1                                                                                                                                                                                                                                                                                                                                                                                                                                                                                                                                                                                                                                                                                                                                                                                                                                                       |
| NADn         | NAD transport, nuclear through pores                  | nad[n] <=> nad[c]                                                                         |          | Transport, Nuclear               |                                                                                                                                                                                                                                                                                                                                                                                                                                                                                                                                                                                                                                                                                                                                                                                                                                                               |
| NADtpu       | NAD transporter, peroxisome                           | nadh[x] --> nadh[c]                                                                       |          | Transport, Peroxisomal           |                                                                                                                                                                                                                                                                                                                                                                                                                                                                                                                                                                                                                                                                                                                                                                                                                                                               |
| NADtru       | NAD transporter, endoplasmic reticulum                | nadh[r] --> nadh[c]                                                                       |          | Transport, Endoplasmic Reticular |                                                                                                                                                                                                                                                                                                                                                                                                                                                                                                                                                                                                                                                                                                                                                                                                                                                               |
| NAGA2ly      | N-acetylgalactosaminidase, alpha-                     | [l] : Tn_antigen + h + udp --> Ser/Thr + udpacgal                                         | 3.2.1.49 | Keratan sulfate degradation      | 4668.1                                                                                                                                                                                                                                                                                                                                                                                                                                                                                                                                                                                                                                                                                                                                                                                                                                                        |
| NAGAlby      | N-acetylgalactosaminidase, beta-                      | [l] : acgbside_hs + h + udp --> gbside_hs + udpacgal                                      |          | Sphingolipid Metabolism          |                                                                                                                                                                                                                                                                                                                                                                                                                                                                                                                                                                                                                                                                                                                                                                                                                                                               |
| NAGAlh       | N-acetylgalactosaminidase, alpha-                     | [l] : acgbside_hs + h + udp --> gbside_hs + udpacgal                                      | 3.2.1.49 | Sphingolipid Metabolism          | 4668.1                                                                                                                                                                                                                                                                                                                                                                                                                                                                                                                                                                                                                                                                                                                                                                                                                                                        |
| NAGLCAly     | N-acetylglucosaminidase, lysosomal                    | [l] : core6 + h2o --> Tn_antigen + acgam                                                  |          | Keratan sulfate degradation      |                                                                                                                                                                                                                                                                                                                                                                                                                                                                                                                                                                                                                                                                                                                                                                                                                                                               |
| NAHCO3_HCLt  | bicarbonate transport (HCl/NaHCO3 exchange)           | cl[e] + h[c] + hco3[e] + na1[e] <=> cl[e] + h[e] + hco3[c] + na1[c]                       |          | Transport, Extracellular         | ( 9498.1 or 57282.1 )                                                                                                                                                                                                                                                                                                                                                                                                                                                                                                                                                                                                                                                                                                                                                                                                                                         |
| NAIt         | Na+ /iodide cotransport                               | i[e] + (2) na1[e] <=> i[c] + (2) na1[c]                                                   |          | Transport, Extracellular         | 6528.1                                                                                                                                                                                                                                                                                                                                                                                                                                                                                                                                                                                                                                                                                                                                                                                                                                                        |
| NaKt         | Na+/K+ exchanging ATPase                              | atp[c] + h2o[c] + (2) k[e] + (3) na1[c] --> adp[c] + h[c] + (2) k[c] + (3) na1[e] + pi[c] | 3.6.3.9  | Transport, Extracellular         | ( ( 481.1 and 476.1 ) or ( 476.1 and 482.1 ) or ( 476.1 and 483.1 ) or ( 476.1 and 23439.1 ) or ( 481.1 and 477.1 ) or ( 478.1 and 481.1 ) or ( 481.1 and 480.1 ) or ( 477.1 and 482.1 ) or ( 478.1 and 482.1 ) or ( 480.1 and 23439.1 ) or ( 23439.1 and 477.1 ) )                                                                                                                                                                                                                                                                                                                                                                                                                                                                                                                                                                                           |
| NaT          | sodium transport (uniport)                            | na1[e] <=> na1[c]                                                                         |          | Transport, Extracellular         | ( 6526.1 or 6528.1 or 6523.1 )                                                                                                                                                                                                                                                                                                                                                                                                                                                                                                                                                                                                                                                                                                                                                                                                                                |
| NaU3_1       | sodium proton antiporter (H:NA is 1:1)                | h[e] + na1[c] <=> h[c] + na1[e]                                                           |          | Transport, Extracellular         | ( 6549.1 or 6550.1 or 389015.1 or 6553.1 or 6548.1 )                                                                                                                                                                                                                                                                                                                                                                                                                                                                                                                                                                                                                                                                                                                                                                                                          |
| NaU3_1g      | sodium proton antiporter (H:NA is 1:1)                | h[g] + na1[c] <=> h[c] + na1[g]                                                           |          | Transport, Golgi Apparatus       | ( 84679.1 or 23315.1 )                                                                                                                                                                                                                                                                                                                                                                                                                                                                                                                                                                                                                                                                                                                                                                                                                                        |
| NaU5         | sodium/ammonium proton antiporter                     | na1[c] + nh4[e] <=> na1[e] + nh4[c]                                                       |          | Transport, Extracellular         | ( 6549.1 or 6550.1 or 6548.1 )                                                                                                                                                                                                                                                                                                                                                                                                                                                                                                                                                                                                                                                                                                                                                                                                                                |
| NaUx         | sodium transport via diffusion (peroxisome)           | na1[c] <=> na1[x]                                                                         |          | Transport, Peroxisomal           |                                                                                                                                                                                                                                                                                                                                                                                                                                                                                                                                                                                                                                                                                                                                                                                                                                                               |
| NBAHH_ir     | Nalpha-(beta-alanyl)-L-histidine hydrolase IR         | [c] : carn + h2o --> ala-B + his-L                                                        | 3.4.13.3 | beta-Alanine metabolism          | 84735.1                                                                                                                                                                                                                                                                                                                                                                                                                                                                                                                                                                                                                                                                                                                                                                                                                                                       |
| NCAMUP       | Nicotinamide acid uptake                              | ncam[e] --> ncam[c]                                                                       |          | Transport, Extracellular         |                                                                                                                                                                                                                                                                                                                                                                                                                                                                                                                                                                                                                                                                                                                                                                                                                                                               |
| NCCt         | Na+-Cl- cotransport                                   | cl[e] + na1[e] --> cl[c] + na1[c]                                                         |          | Transport, Extracellular         | 6559.1                                                                                                                                                                                                                                                                                                                                                                                                                                                                                                                                                                                                                                                                                                                                                                                                                                                        |
| NCKt         | Na+/Ca2+-K+ exchange                                  | ca2[e] + k[e] + (4) na1[c] <=> ca2[c] + k[c] + (4) na1[e]                                 |          | Transport, Extracellular         | ( 9187.1 or 25769.1 or 123041.3 or 57419.1 or 123041.1 or 123041.2 )                                                                                                                                                                                                                                                                                                                                                                                                                                                                                                                                                                                                                                                                                                                                                                                          |
| NCNt         | Na+/Ca2+-NH4+ exchange                                | ca2[e] + (4) na1[c] + nh4[e] <=> ca2[c] + (4) na1[e] + nh4[c]                             |          | Transport, Extracellular         | ( 9187.1 or 25769.1 )                                                                                                                                                                                                                                                                                                                                                                                                                                                                                                                                                                                                                                                                                                                                                                                                                                         |
| NDP10ex      | nucleoside-diphosphatase (IDP), extracellular         | [e] : h2o + idp --> h + imp + pi                                                          | 3.6.1.6  | Nucleotides                      | 124583.1                                                                                                                                                                                                                                                                                                                                                                                                                                                                                                                                                                                                                                                                                                                                                                                                                                                      |
| NDP3ex       | nucleoside-diphosphatase (GDP), extracellular         | [e] : gdp + h2o --> gmp + h + pi                                                          | 3.6.1.6  | Nucleotides                      | 124583.1                                                                                                                                                                                                                                                                                                                                                                                                                                                                                                                                                                                                                                                                                                                                                                                                                                                      |
| NDP6         | nucleoside-diphosphatase (dCDP)                       | [c] : dcdp + h2o --> dcmp + h + pi                                                        | 3.6.1.6  | Nucleotides                      |                                                                                                                                                                                                                                                                                                                                                                                                                                                                                                                                                                                                                                                                                                                                                                                                                                                               |
| NDP7er       | nucleoside-diphosphatase (UDP), endoplasmic reticulum | [r] : h2o + udp --> h + pi + ump                                                          | 3.6.1.6  | Nucleotides                      |                                                                                                                                                                                                                                                                                                                                                                                                                                                                                                                                                                                                                                                                                                                                                                                                                                                               |

| Abbreviation | Reaction Name                                           | Reaction                           | E.C. #  | Pathway     | Gene association                                                                             |
|--------------|---------------------------------------------------------|------------------------------------|---------|-------------|----------------------------------------------------------------------------------------------|
| NDP7ex       | nucleoside-diphosphatase (UDP), extracellular           | [e] : h2o + udp --> h + pi + ump   | 3.6.1.6 | Nucleotides | 124583.1                                                                                     |
| NDP7g        | nucleoside-diphosphatase (UDP), Golgi apparatus         | [g] : h2o + udp --> h + pi + ump   | 3.6.1.6 | Nucleotides | 9583.1                                                                                       |
| NDP8         | nucleoside-diphosphatase (dUDP)                         | [c] : dadp + h2o --> dump + h + pi | 3.6.1.6 | Nucleotides | 1841.1                                                                                       |
| NDP8ex       | nucleoside-diphosphatase (UTP), extracellular           | [e] : h2o + utp --> h + pi + udp   | 3.6.1.6 | Nucleotides | 124583.1                                                                                     |
| NDPK1        | nucleoside-diphosphate kinase (ATP:GDP)                 | [c] : atp + gdp <=> adp + gtp      | 2.7.4.6 | Nucleotides | (( 4831.1 and 4830.1 ) or ( 4830.2 and 4831.1 ) or 4832.1 or 29922.2 or 10201.1 or 29922.1 ) |
| NDPK10       | nucleoside-diphosphate kinase (ATP:dIDP)                | [c] : atp + didp <=> adp + ditp    | 2.7.4.6 | Nucleotides | (( 4831.1 and 4830.1 ) or ( 4830.2 and 4831.1 ) or 4832.1 or 10201.1 or 29922.1 or 29922.2 ) |
| NDPK10m      | nucleoside-diphosphate kinase (ATP:dIDP), mitochondrial | [m] : atp + didp <=> adp + ditp    | 2.7.4.6 | Nucleotides | 4833.1                                                                                       |
| NDPK10n      | nucleoside-diphosphate kinase (ATP:dIDP), nuclear       | [n] : atp + didp <=> adp + ditp    | 2.7.4.6 | Nucleotides | (( 4831.1 and 4830.1 ) or ( 4831.1 and 4830.2 ) )                                            |
| NDPK1m       | nucleoside-diphosphate kinase (ATP:GDP), mitochondrial  | [m] : atp + gdp <=> adp + gtp      | 2.7.4.6 | Nucleotides | 4833.1                                                                                       |
| NDPK1n       | nucleoside-diphosphate kinase (ATP:GDP), nuclear        | [n] : atp + gdp <=> adp + gtp      | 2.7.4.6 | Nucleotides | (( 4831.1 and 4830.1 ) or ( 4831.1 and 4830.2 ) )                                            |
| NDPK2        | nucleoside-diphosphate kinase (ATP:UDP)                 | [c] : atp + udp <=> adp + utp      | 2.7.4.6 | Nucleotides | (( 4831.1 and 4830.1 ) or ( 4830.2 and 4831.1 ) or 4832.1 or 10201.1 or 29922.1 or 29922.2 ) |
| NDPK2m       | nucleoside-diphosphate kinase (ATP:UDP), mitochondrial  | [m] : atp + udp <=> adp + utp      | 2.7.4.6 | Nucleotides | 4833.1                                                                                       |
| NDPK2n       | nucleoside-diphosphate kinase (ATP:UDP), nuclear        | [n] : atp + udp <=> adp + utp      | 2.7.4.6 | Nucleotides | (( 4831.1 and 4830.1 ) or ( 4831.1 and 4830.2 ) )                                            |
| NDPK3        | nucleoside-diphosphate kinase (ATP:CDP)                 | [c] : atp + cdp <=> adp + ctp      | 2.7.4.6 | Nucleotides | (( 4831.1 and 4830.1 ) or ( 4830.2 and 4831.1 ) or 4832.1 or 10201.1 or 29922.1 or 29922.2 ) |
| NDPK3m       | nucleoside-diphosphate kinase (ATP:CDP), mitochondrial  | [m] : atp + cdp <=> adp + ctp      | 2.7.4.6 | Nucleotides | 4833.1                                                                                       |
| NDPK3n       | nucleoside-diphosphate kinase (ATP:CDP), nuclear        | [n] : atp + cdp <=> adp + ctp      | 2.7.4.6 | Nucleotides | (( 4831.1 and 4830.1 ) or ( 4831.1 and 4830.2 ) )                                            |
| NDPK4        | nucleoside-diphosphate kinase (ATP:dTDP)                | [c] : atp + dtdp <=> adp + dtp     | 2.7.4.6 | Nucleotides | (( 4831.1 and 4830.1 ) or ( 4830.2 and 4831.1 ) or 4832.1 or 10201.1 or 29922.1 or 29922.2 ) |
| NDPK4m       | nucleoside-diphosphate kinase (ATP:dTDP), mitochondrial | [m] : atp + dtdp <=> adp + dtp     | 2.7.4.6 | Nucleotides | 4833.1                                                                                       |
| NDPK4n       | nucleoside-diphosphate kinase (ATP:dTDP), nuclear       | [n] : atp + dtdp <=> adp + dtp     | 2.7.4.6 | Nucleotides | (( 4831.1 and 4830.1 ) or ( 4831.1 and 4830.2 ) )                                            |
| NDPK5        | nucleoside-diphosphate kinase (ATP:dGDP)                | [c] : atp + dgdp <=> adp + dgtp    | 2.7.4.6 | Nucleotides | (( 4830.2 and 4831.1 ) or ( 4831.1 and 4830.1 ) or 4832.1 or 10201.1 or 29922.1 or 29922.2 ) |
| NDPK5m       | nucleoside-diphosphate kinase (ATP:dGDP), mitochondrial | [m] : atp + dgdp <=> adp + dgtp    | 2.7.4.6 | Nucleotides | 4833.1                                                                                       |
| NDPK5n       | nucleoside-diphosphate kinase (ATP:dGDP), nuclear       | [n] : atp + dgdp <=> adp + dgtp    | 2.7.4.6 | Nucleotides | (( 4831.1 and 4830.1 ) or ( 4831.1 and 4830.2 ) )                                            |
| NDPK6        | nucleoside-diphosphate kinase (ATP:dUDP)                | [c] : atp + dudp <=> adp + dutp    | 2.7.4.6 | Nucleotides | (( 4831.1 and 4830.1 ) or ( 4830.2 and 4831.1 ) or 4832.1 or 10201.1 or 29922.1 or 29922.2 ) |
| NDPK6m       | nucleoside-diphosphate kinase (ATP:dUDP), mitochondrial | [m] : atp + dudp <=> adp + dutp    | 2.7.4.6 | Nucleotides | 4833.1                                                                                       |
| NDPK6n       | nucleoside-diphosphate kinase (ATP:dUDP), nuclear       | [n] : atp + dudp <=> adp + dutp    | 2.7.4.6 | Nucleotides | (( 4831.1 and 4830.1 ) or ( 4831.1 and 4830.2 ) )                                            |
| NDPK7        | nucleoside-diphosphate kinase (ATP:dCDP)                | [c] : atp + dcdp <=> adp + dctp    | 2.7.4.6 | Nucleotides | (( 4831.1 and 4830.1 ) or ( 4830.2 and 4831.1 ) or 4832.1 or 10201.1 or 29922.1 or 29922.2 ) |
| NDPK7m       | nucleoside-diphosphate kinase (ATP:dCDP), mitochondrial | [m] : atp + dcdp <=> adp + dctp    | 2.7.4.6 | Nucleotides | 4833.1                                                                                       |
| NDPK7n       | nucleoside-diphosphate kinase (ATP:dCDP), nuclear       | [n] : atp + dcdp <=> adp + dctp    | 2.7.4.6 | Nucleotides | (( 4831.1 and 4830.1 ) or ( 4831.1 and 4830.2 ) )                                            |
| NDPK8        | nucleoside-diphosphate kinase (ATP:dADP)                | [c] : atp + dadp <=> adp + datp    | 2.7.4.6 | Nucleotides | (( 4831.1 and 4830.1 ) or ( 4830.2 and 4831.1 ) or 4832.1 or 10201.1 or 29922.1 or 29922.2 ) |
| NDPK8m       | nucleoside-diphosphate kinase (ATP:dADP), mitochondrial | [m] : atp + dadp <=> adp + datp    | 2.7.4.6 | Nucleotides | 4833.1                                                                                       |
| NDPK8n       | nucleoside-diphosphate kinase (ATP:dADP), nuclear       | [n] : atp + dadp <=> adp + datp    | 2.7.4.6 | Nucleotides | (( 4831.1 and 4830.1 ) or ( 4831.1 and 4830.2 ) )                                            |
| NDPK9        | nucleoside-diphosphate kinase (ATP:IDP)                 | [c] : atp + idp <=> adp + itp      | 2.7.4.6 | Nucleotides | (( 4831.1 and 4830.1 ) or ( 4830.2 and 4831.1 ) or 4832.1 or 10201.1 or 29922.1 or 29922.2 ) |

| Abbreviation | Reaction Name                                                   | Reaction                                                                                     | E.C. #     | Pathway                         | Gene association                                               |
|--------------|-----------------------------------------------------------------|----------------------------------------------------------------------------------------------|------------|---------------------------------|----------------------------------------------------------------|
| NDPK9m       | nucleoside-diphosphate kinase (ATP-IDP), mitochondrial          | [m] : atp + idp <=> adp + itp                                                                | 2.7.4.6    | Nucleotides                     | 4833.1                                                         |
| NDPK9n       | nucleoside-diphosphate kinase (ATP-IDP), nuclear                | [n] : atp + idp <=> adp + itp                                                                | 2.7.4.6    | Nucleotides                     | ( 4831.1 and 4830.1 ) or ( 4831.1 and 4830.2 )                 |
| NH43r        | ammonia transport via proton antiport                           | h[e] + nh4[e] <=> h[c] + nh4[e]                                                              |            | Transport, Extracellular        | ( 6005.1 or 57127.1 )                                          |
| NH4tn        | ammonia nuclear transport                                       | nh4[c] <=> nh4[n]                                                                            |            | Transport, Nuclear              |                                                                |
| NH4tp        | ammonia peroxisomal transport                                   | nh4[e] <=> nh4[x]                                                                            |            | Transport, Peroxisomal          |                                                                |
| NICRNS       | NICRNS                                                          | [c] : atp + nicrns -> adp + h + nicrnt                                                       |            | NAD Metabolism                  |                                                                |
| NICRNTn      | NICRNT transport, nuclear through pore                          | nicrnt[c] <=> nicrnt[n]                                                                      |            | Transport, Nuclear              |                                                                |
| NIFEDIPINete | xenobiotic transport                                            | nifedipine[e] <=> nifedipine[c]                                                              |            | Transport, Extracellular        |                                                                |
| NKCC2t       | Na+-K+-Cl- cotransport (NH4+)                                   | (2) cl[e] + na1[e] + nh4[e] <=> (2) cl[c] + na1[c] + nh4[c]                                  |            | Transport, Extracellular        | ( 6557.1 or 6558.1 )                                           |
| NKCCt        | Na+-K+-Cl- cotransport                                          | (2) cl[e] + k[e] + na1[e] <=> (2) cl[c] + k[c] + na1[c]                                      |            | Transport, Extracellular        | ( 6557.1 or 6558.1 )                                           |
| NMNATm       | nicotinamide-nucleotide adenyltransferase, mitochondrial        | [m] : atp + h + nmn -> nad + ppi                                                             | 2.7.7.1    | NAD Metabolism                  | 349565.1                                                       |
| NMNATn       | nicotinamide-nucleotide adenyltransferase                       | [n] : atp + h + nmn -> nad + ppi                                                             | 2.7.7.1    | NAD Metabolism                  | 64802.1                                                        |
| NMNATr       | nicotinamide-nucleotide adenyltransferase                       | [c] : atp + h + nmn <=> nad + ppi                                                            | 2.7.7.1    | NAD Metabolism                  | ( 349565.1 or 23057.2 or 23057.1 )                             |
| NMNS         | NMN synthetase                                                  | [c] : h + ncam + prpp -> nmn + ppi                                                           | 2.4.2.12   | NAD Metabolism                  |                                                                |
| NMNtn        | NMN transport, nuclear through pore                             | nmn[c] <=> nmn[n]                                                                            |            | Transport, Nuclear              |                                                                |
| NMPTRCOX     | N-Methylputrescine:oxygen oxidoreductase (deaminating)          | [c] : nmptre + o2 -> 1mpyr + h2o2 + nh4                                                      | 1.4.3.6    | Alkaloid biosynthesis II        | ( 314.1 or 314.2 or 8639.1 or 26.1 )                           |
| NNAT         | nicotinate-nucleotide adenyltransferase                         | [c] : atp + h + nicrnt -> dnad + ppi                                                         | 2.7.7.18   | NAD Metabolism                  | ( 5167.1 or 5168.1 or 5169.1 )                                 |
| NNATm        | nicotinate-nucleotide adenyltransferase, mitochondrial          | [m] : atp + h + nicrnt -> dnad + ppi                                                         | 2.7.7.18   | NAD Metabolism                  | 349565.1                                                       |
| NNATn        | nicotinate-nucleotide adenyltransferase                         | [n] : atp + h + nicrnt -> dnad + ppi                                                         | 2.7.7.18   | NAD Metabolism                  | 64802.1                                                        |
| NNATr        | nicotinate-nucleotide adenyltransferase                         | [c] : atp + h + nicrnt <=> dnad + ppi                                                        | 2.7.7.18   | NAD Metabolism                  | ( 349565.1 or 23057.1 or 23057.2 )                             |
| NNDP         | nicotinate-nucleotide diphosphorylase (carboxylating)           | [c] : (2) h + prpp + quin -> co2 + nicrnt + ppi                                              | 2.4.2.19   | NAD Metabolism                  | 23475.1                                                        |
| NNMT         | Nicotinamide N-methyltransferase                                | [c] : amet + ncam -> 1nncam + ahcys                                                          | 2.1.1.1    | NAD Metabolism                  | 4837.1                                                         |
| NORANMT      | noradrenaline N-methyltransferase                               | [c] : amet + nrpphr -> adrn1 + ahcys + h                                                     | 2.1.1.28   | Tyrosine metabolism             | 5409.1                                                         |
| NOS1         | Nitric Oxide Synthase (intermediate forming)                    | [c] : arg-L + h + nadph + o2 -> h2o + nadp + nwharg                                          | 1.14.13.39 | Arginine and Proline Metabolism | ( 4842.1 or 4843.1 or 4843.2 or 4844.1 or 4845.1 or 4846.1 )   |
| NOS2         | Nitric Oxide Synthase (NO forming)                              | [c] : nadph + (2) nwharg + (2) o2 -> (2) citr-L + h + (2) h2o + nadp + (2) no                | 1.14.13.39 | Arginine and Proline Metabolism | ( 4842.1 or 4843.1 or 4843.2 or 4844.1 or 4845.1 or 4846.1 )   |
| NOt          | NO transport (diffusion)                                        | no[e] <=> no[c]                                                                              |            | Transport, Extracellular        |                                                                |
| NP1          | nucleotide phosphatase                                          | [c] : h + nac + r1p -> nicrns + pi                                                           | 2.4.2.1    | NAD Metabolism                  | 4860.1                                                         |
| NPTHLe       | xenobiotic transport                                            | npth[e] <=> npth[c]                                                                          |            | Transport, Extracellular        |                                                                |
| NRPPHRSFt    | norepinephrine sulfate transport (diffusion)                    | nrpphrs[e] -> nrpphrs[c]                                                                     |            | Transport, Extracellular        |                                                                |
| NRPPHRsULT   | Norepinephrine Sulfotransferase                                 | [c] : nrpphr + paps -> h + nrpphrs + pap                                                     | 2.8.2.1    | Tyrosine metabolism             | ( 6818.1 or 6818.2 or 6818.3 )                                 |
| NRPPHRt4(2)r | Norepinephrine reversible transport in via sodium symport (1:2) | (2) na1[e] + nrpphr[e] <=> (2) na1[c] + nrpphr[c]                                            |            | Transport, Extracellular        | ( 6530.1 or 6531.1 )                                           |
| NRPPHRtu     | Norepinephrine uniport                                          | nrpphr[e] <=> nrpphr[c]                                                                      |            | Transport, Extracellular        | ( 6582.1 or 6582.2 or 6581.1 )                                 |
| NRPPHRVESSEC | Noradrenaline secretion via secretory vesicle (ATP driven)      | (2) atp[c] + (2) h2o[c] + (3) nrpphr[c] -> (2) adp[c] + (2) h[c] + (3) nrpphr[e] + (2) pi[c] |            | Transport, Extracellular        | ( 6570.1 or 6571.1 )                                           |
| NRVNCOAtx    | fatty acid intracellular transport                              | nrvncoo[c] <=> nrvncoo[x]                                                                    |            | Transport, Peroxisomal          |                                                                |
| NRVNCCPT1    | carnitine O-palmitoyltransferase                                | [c] : crn + nrvncoo -> coa + nrvnccrn                                                        | 2.3.1.21   | Carnitine shuttle               | ( 1375.4 or 1374.1 or 126129.1 or 1375.3 or 1375.2 or 1375.1 ) |
| NRVNCCPT2    | carnitine transferase                                           | [m] : coa + nrvnccrn -> crn + nrvncoo                                                        |            | Carnitine shuttle               | 1376.1                                                         |
| NRVNCCRNt    | transport into the mitochondria (carnitine)                     | nrvnccrn[c] -> nrvnccrn[m]                                                                   |            | Carnitine shuttle               | 788.1                                                          |
| NRVNCt       | fatty acid transport via diffusion                              | nrvc[e] <=> nrvc[c]                                                                          |            | Transport, Extracellular        |                                                                |
| NS26T2g      | alpha-N-acetylgalactosaminide alpha-2,6-sialyltransferase       | [g] : cmpacna + sT_antigen -> cmp + dsT_antigen + h                                          | 2.4.99.3   | O-Glycan Biosynthesis           | 55808.1                                                        |
| NS26Tg       | alpha-N-acetylgalactosaminide alpha-2,6-sialyltransferase       | [g] : Tn_antigen + cmpacna -> cmp + h + sTn_antigen                                          | 2.4.99.3   | O-Glycan Biosynthesis           | 55808.1                                                        |
| NT5C         | 5'-nucleotidase                                                 | [c] : h2o + nicrnt -> nicrns + pi                                                            | 3.1.3.5    | NAD Metabolism                  | 22978.1                                                        |
| NTD1         | 5'-nucleotidase (dUMP)                                          | [c] : dump + h2o -> duri + pi                                                                | 3.1.3.5    | Pyrimidine Catabolism           | 30833.1                                                        |
| NTD10        | 5'-nucleotidase (XMP)                                           | [c] : h2o + xmp -> pi + xsn                                                                  | 3.1.3.5    | Nucleotides                     | 22978.1                                                        |
| NTD11        | 5'-nucleotidase (IMP)                                           | [c] : h2o + imp -> ins + pi                                                                  | 3.1.3.5    | Purine Catabolism               | ( 22978.1 or 93034.1 or 93034.2 )                              |
| NTD12        | 5'-nucleotidase (dIMP)                                          | [c] : dimp + h2o -> dm + pi                                                                  | 3.1.3.5    | Nucleotides                     | 30833.1                                                        |
| NTD1m        | 5'-nucleotidase (dUMP),mitochondrial                            | [m] : dump + h2o -> duri + pi                                                                | 3.1.3.5    | Nucleotides                     | 56953.1                                                        |
| NTD2         | 5'-nucleotidase (UMP)                                           | [c] : h2o + ump -> pi + uri                                                                  | 3.1.3.5    | Pyrimidine Catabolism           | 51251.1                                                        |
| NTD2e        | 5'-nucleotidase (UMP), extracellular                            | [e] : h2o + ump -> pi + uri                                                                  | 3.1.3.5    | Nucleotides                     | 4907.1                                                         |
| NTD2l        | 5'-nucleotidase (UMP), lysosome                                 | [l] : h2o + ump -> pi + uri                                                                  | 3.1.3.5    | Nucleic acid degradation        | 53.1                                                           |
| NTD2m        | 5'-nucleotidase (UMP), mitochondrial                            | [m] : h2o + ump -> pi + uri                                                                  | 3.1.3.5    | Nucleotides                     | 56953.1                                                        |
| NTD3         | 5'-nucleotidase (dCMP)                                          | [c] : dcmp + h2o -> dcyt + pi                                                                | 3.1.3.5    | Pyrimidine Catabolism           | ( 93034.1 or 93034.2 or 30833.1 )                              |
| NTD3l        | 5'-nucleotidase (dCMP), lysosomal                               | [l] : dcmp + h2o -> dcyt + pi                                                                | 3.1.3.5    | Nucleic acid degradation        | 53.1                                                           |
| NTD4         | 5'-nucleotidase (CMP)                                           | [c] : cmp + h2o -> cytd + pi                                                                 | 3.1.3.5    | Pyrimidine Catabolism           | 51251.1                                                        |
| NTD4e        | 5'-nucleotidase (CMP), extracellular                            | [e] : cmp + h2o -> cytd + pi                                                                 | 3.1.3.5    | Nucleotides                     | 4907.1                                                         |
| NTD4l        | 5'-nucleotidase (CMP), lysosome                                 | [l] : cmp + h2o -> cytd + pi                                                                 | 3.1.3.5    | Nucleic acid degradation        | 53.1                                                           |
| NTD5         | 5'-nucleotidase (dTMP)                                          | [c] : dtmp + h2o -> pi + thymd                                                               | 3.1.3.5    | Pyrimidine Catabolism           | 30833.1                                                        |
| NTD5l        | 5'-nucleotidase (dTMP), lysosomal                               | [l] : dtmp + h2o -> pi + thymd                                                               | 3.1.3.5    | Nucleic acid degradation        | 53.1                                                           |
| NTD5m        | 5'-nucleotidase (dTMP), mitochondrial                           | [m] : dtmp + h2o -> pi + thymd                                                               | 3.1.3.5    | Nucleotides                     | 56953.1                                                        |
| NTD6         | 5'-nucleotidase (dAMP)                                          | [c] : damp + h2o -> dad-2 + pi                                                               | 3.1.3.5    | Nucleotides                     | 22978.1                                                        |
| NTD6l        | 5'-nucleotidase (dAMP), lysosome                                | [l] : damp + h2o -> dad-2 + pi                                                               | 3.1.3.5    | Nucleic acid degradation        | 53.1                                                           |
| NTD7         | 5'-nucleotidase (AMP)                                           | [c] : amp + h2o -> adn + pi                                                                  | 3.1.3.5    | Nucleotides                     | ( 22978.1 or 93034.1 or 93034.2 )                              |
| NTD7e        | 5'-nucleotidase (AMP), extracellular                            | [e] : amp + h2o -> adn + pi                                                                  | 3.1.3.5    | Nucleotides                     | 4907.1                                                         |
| NTD7l        | 5'-nucleotidase (AMP), lysosome                                 | [l] : amp + h2o -> adn + pi                                                                  | 3.1.3.5    | Nucleic acid degradation        | 53.1                                                           |
| NTD8         | 5'-nucleotidase (dGMP)                                          | [c] : dgmp + h2o -> dgsn + pi                                                                | 3.1.3.5    | Nucleotides                     | ( 22978.1 or 30833.1 )                                         |
| NTD8l        | 5'-nucleotidase (dGMP), lysosomal                               | [l] : dgmp + h2o -> dgsn + pi                                                                | 3.1.3.5    | Nucleic acid degradation        | 53.1                                                           |
| NTD9         | 5'-nucleotidase (GMP)                                           | [c] : gmp + h2o -> gsn + pi                                                                  | 3.1.3.5    | Nucleotides                     | 22978.1                                                        |
| NTD9e        | 5'-nucleotidase (GMP), extracellular                            | [e] : gmp + h2o -> gsn + pi                                                                  | 3.1.3.5    | Nucleotides                     | 4907.1                                                         |
| NTD9l        | 5'-nucleotidase (GMP), lysosome                                 | [l] : gmp + h2o -> gsn + pi                                                                  | 3.1.3.5    | Nucleic acid degradation        | 53.1                                                           |
| NTMELYStner  | protein trimethyl lysine transport (nucleus to ER)              | Ntmelys[n] -> Ntmelys[r]                                                                     |            | Transport, Nuclear              |                                                                |



| Abbreviation | Reaction Name                                                                       | Reaction                                                                   | E.C. #    | Pathway                                    | Gene association                                                                              |
|--------------|-------------------------------------------------------------------------------------|----------------------------------------------------------------------------|-----------|--------------------------------------------|-----------------------------------------------------------------------------------------------|
| NTP3e        | nucleoside-triphosphatase (GTP)                                                     | [e] : gtp + h2o --> gdp + h + pi                                           | 3.6.1.15  | Nucleotides                                | 124583.1                                                                                      |
| NTPP10       | Nucleoside triphosphate pyrophosphorylase (dntp)                                    | [e] : dntp + h2o --> dmp + h + ppi                                         | 3.6.1.19  | Nucleotides                                | (3704.1 or 3704.2)                                                                            |
| NTPP11       | Nucleoside triphosphate pyrophosphorylase (xtp)                                     | [e] : h2o + xtp --> h + ppi + xmp                                          | 3.6.1.19  | Nucleotides                                | (3704.1 or 3704.2)                                                                            |
| NTPP9        | Nucleoside triphosphate pyrophosphorylase (itp)                                     | [e] : h2o + itp --> h + imp + ppi                                          | 3.6.1.19  | Nucleotides                                | (3704.1 or 3704.2)                                                                            |
| O16G1e       | oligo-1,6-glucosidase (glygn4 -> glygn5), extracellular                             | [e] : glygn4 + h2o --> glc-D + glygn5                                      | 3.2.1.10  | Starch and Sucrose Metabolism              | 6476.1                                                                                        |
| O16G2e       | oligo-1,6-glucosidase (strch2 -> strch3), extracellular                             | [e] : h2o + strch2 --> glc-D + malt                                        | 3.2.1.10  | Starch and Sucrose Metabolism              | 6476.1                                                                                        |
| O2St         | superoxide anion transport via diffusion (extracellular)                            | o2s[e] <=> o2s[e]                                                          |           | Transport, Extracellular                   |                                                                                               |
| O2Stm        | superoxide anion transport via diffusion (mitochondria)                             | o2s[e] <=> o2s[m]                                                          |           | Transport, Mitochondrial                   |                                                                                               |
| O2Stn        | superoxide anion transport via diffusion (nucleus)                                  | o2s[e] <=> o2s[n]                                                          |           | Transport, Nuclear                         |                                                                                               |
| O2Stx        | superoxide anion transport via diffusion (peroxisome)                               | o2s[e] <=> o2s[x]                                                          |           | Transport, Peroxisomal                     |                                                                                               |
| O2t          | o2 transport (diffusion)                                                            | o2[e] <=> o2[e]                                                            |           | Transport, Extracellular                   |                                                                                               |
| O2ter        | O2 transport, endoplasmic reticulum                                                 | o2[e] <=> o2[r]                                                            |           | Transport, Endoplasmic Reticular           |                                                                                               |
| O2tm         | O2 transport (diffusion)                                                            | o2[e] <=> o2[m]                                                            |           | Transport, Mitochondrial                   |                                                                                               |
| O2n          | O2 nuclear transport                                                                | o2[e] <=> o2[n]                                                            |           | Transport, Nuclear                         |                                                                                               |
| O2tp         | O2 transport, peroxisomal                                                           | o2[e] <=> o2[x]                                                            |           | Transport, Peroxisomal                     |                                                                                               |
| OAGD3te      | oag3_hs transport                                                                   | oag3_hs[e] <=> oag3_hs[e]                                                  |           | Transport, Extracellular                   |                                                                                               |
| OAGD3tg      | oag3_hs intracellular transport                                                     | oag3_hs[e] <=> oag3_hs[g]                                                  |           | Transport, Golgi Apparatus                 |                                                                                               |
| OAGT3te      | oag3_hs transport                                                                   | oag3_hs[e] <=> oag3_hs[e]                                                  |           | Transport, Extracellular                   |                                                                                               |
| OAGT3tg      | oag3_hs intracellular transport                                                     | oag3_hs[e] <=> oag3_hs[g]                                                  |           | Transport, Golgi Apparatus                 |                                                                                               |
| OBDC         | 2-Oxobutanate dehydrogenase, cytosolic                                              | [c] : 2obut + coa + nad --> co2 + nadh + ppeoa                             | 1.2.7.2   | Glycine, Serine, and Threonine Metabolism  |                                                                                               |
| OCB1m        | ornithine carbamoyltransferase, irreversible                                        | [m] : cbp + orn --> citr-L + h + pi                                        | 2.1.3.3   | Urea cycle/amino group metabolism          | 5009.1                                                                                        |
| OCOAAtm      | Octanoyl-CoA transport, diffusion                                                   | occoa[e] --> occoa[m]                                                      |           | Transport, Mitochondrial                   |                                                                                               |
| OCCOAtx      | fatty acid intracellular transport                                                  | occoa[e] <=> occoa[x]                                                      |           | Transport, Peroxisomal                     |                                                                                               |
| OCDCAtx      | fatty acid transport via diffusion                                                  | ocdea[e] <=> ocdea[e]                                                      |           | Transport, Extracellular                   |                                                                                               |
| OCDEAtr      | fatty acid transport via diffusion                                                  | ocdea[e] <=> ocdea[e]                                                      |           | Transport, Extracellular                   |                                                                                               |
| OCOAT1m      | 3-oxoacid CoA-transferase                                                           | [m] : acac + succoa <=> aacoa + succ                                       | 2.8.3.5   | Valine, Leucine, and Isoleucine Metabolism | (5019.1 or 64064.1)                                                                           |
| OCTAt        | Octanoate transport via diffusion                                                   | octa[e] <=> octa[e]                                                        |           | Transport, Extracellular                   |                                                                                               |
| ODECOAtx     | fatty acid intracellular transport                                                  | odecoa[e] <=> odecoa[x]                                                    |           | Transport, Peroxisomal                     |                                                                                               |
| OIVD1m       | 2-oxoisovalerate dehydrogenase (acylating: 4-methyl-2-oxopentanoate), mitochondrial | [m] : 4mop + coa + nad --> co2 + ivcoa + nadh                              | 1.2.1.25  | Valine, Leucine, and Isoleucine Metabolism | (( (594.1 and 593.1) and 1738.1 and 1629.1) or (1738.1 and 1629.1 and (593.1 and 594.2) ) )   |
| OIVD2m       | 2-oxoisovalerate dehydrogenase (acylating: 3-methyl-2-oxobutanoate), mitochondrial  | [m] : 3mob + coa + nad --> co2 + ibcoa + nadh                              | 1.2.1.25  | Valine, Leucine, and Isoleucine Metabolism | (( (1738.1 and 1629.1) and (594.1 and 593.1) ) or (1629.1 and (593.1 and 594.2) and 1738.1) ) |
| OIVD3m       | 2-oxoisovalerate dehydrogenase (acylating: 3-methyl-2-oxopentanoate), mitochondrial | [m] : 3mop + coa + nad --> 2mbcoa + co2 + nadh                             | 1.2.1.25  | Valine, Leucine, and Isoleucine Metabolism | (( (594.1 and 593.1) and 1629.1 and 1738.1) or ((593.1 and 594.2) and 1738.1 and 1629.1) )    |
| OMEPRAZOLEte | xenobiotic transport                                                                | omeprazole[e] <=> omeprazole[e]                                            |           | Transport, Extracellular                   |                                                                                               |
| OMPDC        | orotidine-5'-phosphate decarboxylase                                                | [c] : h + orot5p --> co2 + ump                                             | 4.1.1.23  | Pyrimidine Biosynthesis                    | 7372.1                                                                                        |
| ONPHTLte     | senobiotic transport                                                                | onph[e] <=> onph[e]                                                        |           | Transport, Extracellular                   |                                                                                               |
| OPAHir       | 5-Oxoprolin amidohydrolase (ATP-hydrolysing) (ir)                                   | [c] : 5oxpro + atp + (2) h2o --> adp + glu-L + h + pi                      | 3.5.2.9   | Glutathione Metabolism                     | 26873.1                                                                                       |
| ORETNF       | 4-oxo-retinoic acid formation (oxidation)                                           | [c] : o2 + (2) retn --> (2) oretn                                          |           | Vitamin A Metabolism                       |                                                                                               |
| ORETNF2      | 13-cis-4-oxo-retinoic acid formation (oxidation)                                    | [c] : (2) 13-cis-retn + o2 --> (2) 13-cis-oretn                            |           | Vitamin A Metabolism                       |                                                                                               |
| ORETNn       | 4-oxo-retinoic acid transport, Nuclear                                              | oretn[e] <=> oretn[n]                                                      |           | Transport, Nuclear                         |                                                                                               |
| ORETNn2      | 13-cis-4-oxo-retinoic acid transport, Nuclear                                       | 13-cis-oretn[e] <=> 13-cis-oretn[n]                                        |           | Transport, Nuclear                         |                                                                                               |
| ORNDc        | Ornithine Decarboxylase                                                             | [c] : h + orn --> co2 + ptrc                                               | 4.1.1.17  | Urea cycle/amino group metabolism          | 4953.1                                                                                        |
| ORN3m        | ornithine mitochondrial transport via proton antiport                               | h[c] + orn[m] <=> h[m] + orn[c]                                            |           | Transport, Mitochondrial                   | (83884.1 or 10166.1)                                                                          |
| ORN4m        | ornithine mitochondrial transport exchange with citruline                           | citr-L[e] + h[c] + orn[m] <=> citr-L[m] + h[m] + orn[c]                    |           | Transport, Mitochondrial                   | (10166.1 or 83884.1)                                                                          |
| ORNTArm      | ornithine transaminase reversible (m)                                               | [m] : alk + orn <=> glu-L + glu5a                                          | 2.6.1.13  | Urea cycle/amino group metabolism          | 4942.1                                                                                        |
| ORNuDF       | ornithine transport via diffusion (extracellular to cytosol)                        | orn[e] --> orn[c]                                                          |           | Transport, Extracellular                   | (6541.1 or 6542.1 or 84889.1)                                                                 |
| ORPT         | orotate phosphoribosyltransferase                                                   | [c] : orot5p + ppi <=> orot + prpp                                         | 2.4.2.10  | Pyrimidine Biosynthesis                    | 7372.1                                                                                        |
| OXAHCotex    | oxalate transport via bicarbonate countertransport                                  | (2) hco3[e] + oxal[e] --> (2) hco3[e] + oxal[e]                            |           | Transport, Extracellular                   | (10861.1 or 10861.2 or 10861.3 or 1836.1 or 1811.1)                                           |
| OXAtp        | oxalate transport out of peroxisome                                                 | oxal[x] --> oxal[e]                                                        |           | Transport, Peroxisomal                     |                                                                                               |
| P4501A1m     | Cytochrome P450 11A1, mitochondrial [Precursor]                                     | [m] : chsterol + h + nadph + (2) o2 --> 4mptnl + (2) h2o + nadp + prgnlone | 1.14.15.6 | Steroid Metabolism                         | 1583.1                                                                                        |
| P4501B11m    | Steroid 11-beta-hydroxylase                                                         | [m] : 11doctrstm + h + nadph + o2 --> crstrn + h2o + nadp                  | 1.14.15.4 | Steroid Metabolism                         | 1584.1                                                                                        |
| P4501B12m    | Steroid 11-beta-hydroxylase                                                         | [m] : 11docrsl + h + nadph + o2 --> crsl + h2o + nadp                      | 1.14.15.4 | Steroid Metabolism                         | 1584.1                                                                                        |
| P4501B21m    | Steroid 11-beta-hydroxylase                                                         | [m] : 11docrstm + h + nadph + (2) o2 --> aldstm + (2) h2o + nadp           | 1.14.15.4 | Steroid Metabolism                         | 1585.1                                                                                        |
| P45017A1r    | Cytochrome P450 17A1                                                                | [r] : h + nadph + o2 + prgnlone --> 17ahprgnlone + h2o + nadp              | 1.14.99.9 | Steroid Metabolism                         | 1586.1                                                                                        |
| P45017A2r    | Cytochrome P450 17A1                                                                | [r] : 17ahprgnlone + h + nadph + (0.5) o2 --> acald + dhea + h2o + nadp    | 1.14.99.9 | Steroid Metabolism                         | 1586.1                                                                                        |
| P45017A3r    | Cytochrome P450 17A1                                                                | [r] : h + nadph + o2 + prgrstm --> 17ahprgrstm + h2o + nadp                | 1.14.99.9 | Steroid Metabolism                         | 1586.1                                                                                        |
| P45017A4r    | Cytochrome P450 17A1                                                                | [r] : 17ahprgrstm + h + nadph + (0.5) o2 --> acald + andrstdn + h2o + nadp | 1.14.99.9 | Steroid Metabolism                         | 1586.1                                                                                        |
| P45019A1r    | aromatase                                                                           | [r] : andrstdn + nadph + (2) o2 --> estrone + for + (2) h2o + nadp         | 1.14.14.1 | Steroid Metabolism                         | (1588.1 or 1588.2)                                                                            |
| P45019A2r    | aromatase                                                                           | [r] : nadph + (2) o2 + tssterone --> estradiol + for + (2) h2o + nadp      | 1.14.14.1 | Steroid Metabolism                         | (1588.1 or 1588.2)                                                                            |
| P4501B1r     | cytochrome P450 1B1                                                                 | [r] : estradiol + h + nadph + o2 --> h2o + hestratriol + nadp              | 1.14.14.1 | Steroid Metabolism                         | 1545.1                                                                                        |

| Abbreviation | Reaction Name                                                       | Reaction                                                              | E.C. #     | Pathway                           | Gene association                                                  |
|--------------|---------------------------------------------------------------------|-----------------------------------------------------------------------|------------|-----------------------------------|-------------------------------------------------------------------|
| P45021A1r    | Steroid 21-hydroxylase                                              | [r] : h + nadph + o2 + pgrstrn -> 11docrstrn + h2o + nadp             | 1.14.99.10 | Steroid Metabolism                | 1589.1                                                            |
| P45021A2r    | Steroid 21-hydroxylase                                              | [r] : 17ahpgrstrn + h + nadph + o2 -> 11docrstrl + h2o + nadp         | 1.14.99.10 | Steroid Metabolism                | 1589.1                                                            |
| P45027A11m   | 5-beta-cholestane-3-alpha,7-alpha,12-alpha-triol 27-hydroxylase     | [m] : h + nadph + o2 + xoltrio1 -> h2o + nadp + xoltetrol             | 1.14.13.15 | Bile Acid Biosynthesis            | 1593.1                                                            |
| P45027A12m   | 5-beta-cholestane-3-alpha,7-alpha,12-alpha-triol 27-hydroxylase     | [m] : nadp + xoltetrol -> h + nadph + thcholst                        | 1.14.13.15 | Bile Acid Biosynthesis            | 1593.1                                                            |
| P45027A13m   | 5-beta-cholestane-3-alpha,7-alpha,12-alpha-triol 27-hydroxylase     | [m] : nadph + o2 + thcholst -> h2o + nadp + thcholstoic               | 1.14.13.15 | Bile Acid Biosynthesis            | 1593.1                                                            |
| P45027A14m   | 5-beta-cytochrome P450, family 27, subfamily A, polypeptide 1       | [m] : h + nadph + o2 + xol7ah2 -> h2o + nadp + xol7ah3                | 1.14.13.15 | Bile Acid Biosynthesis            | 1593.1                                                            |
| P45027A15m   | 5-beta-cytochrome P450, family 27, subfamily A, polypeptide 1       | [m] : h + nadph + o2 + xol7ah3 -> (2) h2o + nadp + xol7ah2al          | 1.14.13.15 | Bile Acid Biosynthesis            | 1593.1                                                            |
| P45027A16m   | Cytochrome P450 27                                                  | [m] : nadph + o2 + xol7ah2al -> dhcholestanate + h2o + nadp           | 1.14.13.15 | Bile Acid Biosynthesis            | 1593.1                                                            |
| P45027A1m    | Cytochrome P450 27                                                  | [m] : chsterol + h + nadph + o2 -> h2o + nadp + xol27oh               |            | Bile Acid Biosynthesis            | 1593.1                                                            |
| P4502A6      | cytochrome P450 2A6                                                 | [c] : coumarin + h + nadph + o2 -> h2o + hcoumarin + nadp             |            | CYP Metabolism                    | (1553.1 or 1548.1)                                                |
| P4502C18     | cytochrome P450 2C18                                                | [c] : antipyrine + h + nadph + (0.5) o2 -> dmantipyrene + meoh + nadp |            | CYP Metabolism                    | 1562.1                                                            |
| P4502C19     | cytochrome P450 2C19                                                | [c] : h + nadph + o2 + omeprazole -> 5homeprazole + h2o + nadp        |            | CYP Metabolism                    | 1557.1                                                            |
| P4502C8      | cytochrome P450 2C8                                                 | [c] : h + nadph + o2 + taxol -> h2o + htaxol + nadp                   |            | CYP Metabolism                    | (1558.1 or 1558.2)                                                |
| P4502C9      | cytochrome P450 2C9                                                 | [c] : h + nadph + o2 + toltamamide -> 4mtolbutamide + h2o + nadp      |            | CYP Metabolism                    | 1559.1                                                            |
| P4502C92     | cytochrome P450 2C9                                                 | [c] : h + limnen + nadph + o2 -> carveol + h2o + nadp                 |            | Limonene and pinene degradation   | (1559.1 or 1557.1)                                                |
| P4502C93     | cytochrome P450 2C9                                                 | [c] : h + limnen + nadph + o2 -> h2o + nadp + perillyl                |            | Limonene and pinene degradation   | (1559.1 or 1557.1)                                                |
| P4502C94     | cytochrome P450 2C9                                                 | [c] : appnn + h + nadph + o2 -> apnnox + h2o + nadp                   |            | Limonene and pinene degradation   | (1559.1 or 1557.1)                                                |
| P4502D6      | cytochrome P450 2D6                                                 | [c] : debrisouquine + h + nadph + o2 -> 4ddebriouquine + h2o + nadp   |            | CYP Metabolism                    | 1565.1                                                            |
| P4502E1      | cytochrome P450 2E1                                                 | [c] : 4nph + h + nadph + o2 -> 24nph + h2o + nadp                     |            | CYP Metabolism                    | 1571.1                                                            |
| P4502F1      | cytochrome P450 2F1                                                 | [c] : h + nadph + nphl + o2 -> h2o + nadp + onphl                     |            | CYP Metabolism                    | 1572.1                                                            |
| P45039A1r    | oxysterol 7-alpha-hydroxylase                                       | [r] : h + nadph + o2 + xol24oh -> h2o + nadp + xoltri24               |            | Bile Acid Biosynthesis            | 51302.1                                                           |
| P4503A4      | cytochrome P450 3A4                                                 | [c] : h + nadph + nifedipine + o2 -> h2o + hnifedipine + nadp         |            | CYP Metabolism                    | 1576.1                                                            |
| P4503A43r    | cytochrome p450 P450 3A43                                           | [r] : h + nadph + o2 + tststerone -> h2o + nadp + whtststerone        |            | Steroid Metabolism                | (64816.1 or 64816.2 or 64816.3)                                   |
| P4503A5      | cytochrome P450 3A5                                                 | [c] : aflatoxin + h + nadph + o2 -> eaflatoxin + h2o + nadp           |            | CYP Metabolism                    | 1577.1                                                            |
| P4503A7r     | cytochrome p450 P450 3A7                                            | [r] : h + nadph + o2 + tststerone -> 6htststerone + h2o + nadp        |            | Steroid Metabolism                | 1551.1                                                            |
| P45046A1r    | cytochrome P450, family 46, subfamily A, polypeptide 1              | [r] : chsterol + h + nadph + o2 -> h2o + nadp + xol24oh               |            | Bile Acid Biosynthesis            | 10858.1                                                           |
| P4504B1r     | cytochrome P450 4B1                                                 | [r] : arachd + h + nadph + o2 -> 12harachd + h2o + nadp               | 1.14.14.1  | Eicosanoid Metabolism             | 1572.1                                                            |
| P4504F121r   | cytochrome p450 4F12/4F2                                            | [r] : arachd + h + nadph + o2 -> h2o + nadp + wharachd                |            | Eicosanoid Metabolism             | 66002.1                                                           |
| P4504F122r   | cytochrome p450 4F12/4F2                                            | [r] : h + leuktrB4 + nadph + o2 -> h2o + leuktrB4woh + nadp           |            | Eicosanoid Metabolism             | (4051.1 or 66002.1 or 8529.1)                                     |
| P4504F123r   | cytochrome p450 4F12/4F2                                            | [r] : ebastine + h + nadph + o2 -> ebastineoh + h2o + nadp            |            | CYP Metabolism                    | 66002.1                                                           |
| P4504F81r    | cytochrome p450 4F8                                                 | [r] : arachd + h + nadph + o2 -> 18harachd + h2o + nadp               |            | Eicosanoid Metabolism             | 11283.1                                                           |
| P4507A1r     | cytochrome P450, family 7, subfamily A, polypeptide 1               | [r] : chsterol + h + nadph + o2 -> h2o + nadp + xol7a                 | 1.14.13.17 | Bile Acid Biosynthesis            | 1581.1                                                            |
| P4507B11r    | oxysterol 7alpha-hydroxylase                                        | [r] : h + nadph + o2 + xol25oh -> h2o + nadp + xoltri25               |            | Bile Acid Biosynthesis            | 9420.1                                                            |
| P4507B12r    | oxysterol 7alpha-hydroxylase                                        | [r] : h + nadph + o2 + xol27oh -> h2o + nadp + xoltri27               |            | Bile Acid Biosynthesis            | 9420.1                                                            |
| P4508B11r    | sterol 12-alpha-hydroxylase                                         | [r] : h + nadph + o2 + xol7aone -> h2o + nadp + xoldiolone            |            | Bile Acid Biosynthesis            | 1582.1                                                            |
| P4508B13r    | sterol 12-alpha-hydroxylase (nadh)                                  | [r] : h + nadh + o2 + xol7aone -> h2o + nad + xoldiolone              |            | Bile Acid Biosynthesis            | 1582.1                                                            |
| P450LTB4r    | cytochrome p450 leukotriene B4                                      | [r] : leuktrB4woh + nadph + (1.5) o2 -> (2) h2o + leuktrB4wooh + nadp |            | Eicosanoid Metabolism             |                                                                   |
| P450SCC1m    | cholesterol monooxygenase                                           | [m] : chsterol + h + nadph + o2 <=> 20ahchsterol + h2o + nadp         |            | Cholesterol Metabolism            |                                                                   |
| P5CDm        | l-pyrroline-5-carboxylate dehydrogenase, mitochondrial              | [m] : lpyr5c + (2) h2o + nad -> glu-L + h + nadh                      |            | Glutamate metabolism              | (8659.1 or 8659.2)                                                |
| P5CR         | pyrroline-5-carboxylate reductase                                   | [c] : lpyr5c + (2) h + nadph -> nadp + pro-L                          | 1.5.1.2    | Urea cycle/amino group metabolism | (29920.1 or 65263.1)                                              |
| P5CRm        | pyrroline-5-carboxylate reductase (m)                               | [m] : lpyr5c + (2) h + nadph -> nadp + pro-L                          | 1.5.1.2    | Arginine and Proline Metabolism   | (5831.1 or 5831.2)                                                |
| P5CRx        | pyrroline-5-carboxylate reductase                                   | [c] : lpyr5c + (2) h + nadh -> nad + pro-L                            | 1.5.1.2    | Urea cycle/amino group metabolism | (29920.1 or 65263.1)                                              |
| P5CRxm       | pyrroline-5-carboxylate reductase (m)                               | [m] : lpyr5c + (2) h + nadh -> nad + pro-L                            | 1.5.1.2    | Arginine and Proline Metabolism   | (5831.1 or 5831.2)                                                |
| PA_HStier    | phosphatidate scramblase                                            | pa_hs[c] <=> pa_hsr[r]                                                |            | Transport, Endoplasmic Reticular  |                                                                   |
| PA_HStig     | phosphatidate scramblase                                            | pa_hs[c] <=> pa_hsg[l]                                                |            | Transport, Golgi Apparatus        |                                                                   |
| PA_HStn      | phosphatidate transport, nuclear                                    | pa_hs[c] <=> pa_hsn[n]                                                |            | Transport, Nuclear                |                                                                   |
| PACCOAL      | phenylacetate-CoA ligase                                            | [c] : atp + coa + pac -> amp + phaccoa + ppi                          | 6.2.1.30   | Phenylalanine metabolism          |                                                                   |
| PAFH         | Platelet-activating factor acetylhydrolase                          | [c] : h2o + paf_hs -> ac + ak2lghcol_hs + h                           | 3.1.1.47   | Glycerophospholipid Metabolism    | (5051.1 or (5049.1 and 5050.1 and 5048.1) or (5049.1 and 5050.1)) |
| PAFHe        | Platelet-activating factor acetylhydrolase                          | [c] : h2o + paf_hs -> ac + ak2lghcol_hs + h                           | 3.1.1.47   | Glycerophospholipid Metabolism    | 7941.1                                                            |
| PAFS         | alkyl glycerol phosphocholine acetyl transferase                    | [c] : accoa + ak2lghcol_hs -> coa + paf_hs                            |            | Glycerophospholipid Metabolism    |                                                                   |
| PAIL_HStn    | phosphatidylinositol nuclear transport (diffusion)                  | pail_hs[c] <=> pail_hsn[n]                                            |            | Transport, Nuclear                |                                                                   |
| PAIL45P_HStn | phosphatidylinositol 4,5-bisphosphate nuclear transport (diffusion) | pail45p_hs[c] <=> pail45p_hsn[n]                                      |            | Transport, Nuclear                |                                                                   |
| PAIL4P_HStn  | phosphatidylinositol 4-phosphate nuclear transport (diffusion)      | pail4p_hs[c] <=> pail4p_hsn[n]                                        |            | Transport, Nuclear                |                                                                   |
| PAN4PP       | phosphatase (pan4p)                                                 | [c] : h2o + pan4p -> pi + pth                                         |            | CoA Catabolism                    |                                                                   |
| PAPStg       | 3-Phosphoadenylyl sulfate Golgi transport                           | paps[c] <=> paps[g]                                                   |            | Transport, Golgi Apparatus        | 347734.1                                                          |
| PAPtg        | adenosine 3',5'-bisphosphate Golgi transport                        | pap[g] -> pap[c]                                                      |            | Transport, Golgi Apparatus        |                                                                   |
| PCFLOPm      | phosphatidylcholine flippase                                        | atp[c] + h2o[c] + pchol_hsm[m] -> adp[c] + h[c] + pchol_hs[c] + p[c]  |            | Transport, Mitochondrial          | 57194.1                                                           |
| PCHOL_HSter  | phosphatidylcholine scramblase                                      | pchol_hs[c] <=> pchol_hsr[r]                                          |            | Transport, Endoplasmic Reticular  |                                                                   |

| Abbreviation  | Reaction Name                                                | Reaction                                                                                                          | E.C. #    | Pathway                           | Gene association                                                                                                                                                                                                                                                                                                                                                                                                                 |
|---------------|--------------------------------------------------------------|-------------------------------------------------------------------------------------------------------------------|-----------|-----------------------------------|----------------------------------------------------------------------------------------------------------------------------------------------------------------------------------------------------------------------------------------------------------------------------------------------------------------------------------------------------------------------------------------------------------------------------------|
| PCHOL_HStg    | phosphatidylcholine scramblase                               | pchol_hs[c] <=> pchol_hs[g]                                                                                       |           | Transport, Golgi Apparatus        |                                                                                                                                                                                                                                                                                                                                                                                                                                  |
| PCHOLP_hs     | choline phosphatase                                          | [c] : h2o + pchol_hs -> chol + h + pa_hs                                                                          | 3.1.4.4   | Glycerophospholipid Metabolism    | 5338.1                                                                                                                                                                                                                                                                                                                                                                                                                           |
| PCHOLPg_hs    | choline phosphatase                                          | [g] : h2o + pchol_hs -> chol + h + pa_hs                                                                          | 3.1.4.4   | Glycerophospholipid Metabolism    | 5337.1                                                                                                                                                                                                                                                                                                                                                                                                                           |
| PCHOLPm_hs    | choline phosphatase                                          | [m] : h2o + pchol_hs -> chol + h + pa_hs                                                                          | 3.1.4.4   | Glycerophospholipid Metabolism    | 5337.1                                                                                                                                                                                                                                                                                                                                                                                                                           |
| PCHOLPr_hs    | choline phosphatase                                          | [r] : h2o + pchol_hs -> chol + h + pa_hs                                                                          | 3.1.4.4   | Glycerophospholipid Metabolism    | 5337.1                                                                                                                                                                                                                                                                                                                                                                                                                           |
| PCLAD         | picolinic acid decarboxylase                                 | [c] : cmusa + h -> amf6a + co2                                                                                    | 4.1.1.45  | Tryptophan metabolism             | 130013.1                                                                                                                                                                                                                                                                                                                                                                                                                         |
| PCLYSOX       | Procollagen-lysine 1, 2-oxoglutarate 5-dioxygenase           | [c] : akc + o2 + pcollglys -> co2 + pcollg5hlys + succ                                                            | 1.14.11.4 | Lysine Metabolism                 | (5352.2 or 5351.1 or 5352.1 or 8985.1 )                                                                                                                                                                                                                                                                                                                                                                                          |
| PCm           | pyruvate carboxylase                                         | [m] : atp + hco3 + pyr -> adp + h + oaa + pi                                                                      | 6.4.1.1   | Pyruvate Metabolism               | (5091.1 or 5091.2 )                                                                                                                                                                                                                                                                                                                                                                                                              |
| PCREATmdiffir | Phosphocreatine transport to/from mitochondria via diffusion | pcreat[m] -> pcreat[c]                                                                                            |           | Urea cycle/amino group metabolism |                                                                                                                                                                                                                                                                                                                                                                                                                                  |
| PCRNtc        | transport into the cytosol from peroxisome (carnitine)       | pcrn[x] -> pcrn[c]                                                                                                |           | Carnitine shuttle                 |                                                                                                                                                                                                                                                                                                                                                                                                                                  |
| PCRNtm        | transport into the mitochondria from cytosol (carnitine)     | pcrn[c] -> pcrn[m]                                                                                                |           | Carnitine shuttle                 |                                                                                                                                                                                                                                                                                                                                                                                                                                  |
| PCt           | phosphatidylcholine transporter                              | atp[c] + h2o[c] + pchol_hs[c] <=> adp[c] + h[c] + pchol_hs[c] + pi[c]                                             |           | Transport, Extracellular          | (5244.1 or 5244.2 or 5244.3 )                                                                                                                                                                                                                                                                                                                                                                                                    |
| PDE1          | 3',5'-cyclic-nucleotide phosphodiesterase                    | [c] : camp + h2o -> amp + h                                                                                       | 3.1.4.17  | Nucleotides                       | (5150.1 or 5150.2 or 10846.1 or 5139.1 or 5140.1 or 5140.2 or 5138.1 or 5136.1 or 5136.2 or 5153.1 or 5137.1 or 27115.1 or 5151.1 or 8622.1 or 5151.2 or 5151.3 or 5151.4 or 5151.5 or 50940.1 or 5141.1 or 5142.1 or 5143.1 or 5144.1 )                                                                                                                                                                                         |
| PDE1g         | 3',5'-cyclic-nucleotide phosphodiesterase, Golgi             | [g] : camp + h2o -> amp + h                                                                                       | 3.1.4.17  | Nucleotides                       | 10846.1                                                                                                                                                                                                                                                                                                                                                                                                                          |
| PDE4          | 3',5'-cyclic-nucleotide phosphodiesterase                    | [c] : 35cgmp + h2o -> gmp + h                                                                                     | 3.1.4.17  | Nucleotides                       | (10846.1 or 5140.1 or 5140.2 or 5138.1 or 5136.1 or 5136.2 or 5153.1 or 5137.1 or 5152.2 or 5152.20 or 5152.3 or 5152.4 or 5152.5 or 5152.6 or 5152.7 or 5152.19 or 5152.18 or 5152.17 or 5152.16 or 5152.15 or 5152.14 or 5152.13 or 5152.12 or 5152.11 or 5152.10 or 50940.1 or 8654.2 or 8654.1 or 8654.3 or ( 5158.1 and 5149.1 and 5145.1 ) or ( 5146.1 and 5148.1 and 5145.1 and 5158.1 and 5147.1 ) or 5146.1 or 5139.1 ) |
| PDE4g         | 3',5'-cyclic-nucleotide phosphodiesterase, Golgi             | [g] : 35cgmp + h2o -> gmp + h                                                                                     | 3.1.4.17  | Nucleotides                       | 10846.1                                                                                                                                                                                                                                                                                                                                                                                                                          |
| PDE4n         | 3',5'-cyclic-nucleotide phosphodiesterase, Nucleus           | [n] : 35cgmp + h2o -> gmp + h                                                                                     | 3.1.4.17  | Nucleotides                       | 5152.1                                                                                                                                                                                                                                                                                                                                                                                                                           |
| PDHm          | pyruvate dehydrogenase                                       | [m] : coa + nad + pyr -> accoa + co2 + nadh                                                                       | 1.2.4.1   | Glycolysis/Gluconeogenesis        | ( ( 1737.1 and ( 8050.1 and 1738.1 ) and ( 5162.1 and 5161.1 ) ) or ( 1737.1 and ( 5160.1 and 5162.1 ) and ( 8050.1 and 1738.1 ) ) )                                                                                                                                                                                                                                                                                             |
| PDXSPO        | pyridoxine 5'-phosphate oxidase                              | [c] : o2 + pdx5p <=> h2o2 + pydx5p                                                                                | 1.4.3.5   | Vitamin B6 Metabolism             | 55163.1                                                                                                                                                                                                                                                                                                                                                                                                                          |
| PDXPP         | Pyridoxine 5-phosphate phosphatase                           | [c] : h2o + pdx5p -> pi + pydxn                                                                                   |           | Vitamin B6 Metabolism             | 57026.1                                                                                                                                                                                                                                                                                                                                                                                                                          |
| PE_HStg       | phosphatidylethanolamine scramblase                          | pe_hs[c] <=> pe_hs[r]                                                                                             |           | Transport, Endoplasmic Reticular  |                                                                                                                                                                                                                                                                                                                                                                                                                                  |
| PE_HStg       | phosphatidylethanolamine scramblase                          | pe_hs[c] <=> pe_hs[g]                                                                                             |           | Transport, Golgi Apparatus        |                                                                                                                                                                                                                                                                                                                                                                                                                                  |
| PE_HStm       | phosphatidylethanolamine scramblase                          | pe_hs[c] <=> pe_hs[m]                                                                                             |           | Transport, Mitochondrial          |                                                                                                                                                                                                                                                                                                                                                                                                                                  |
| PEAMNO        | Phenethylamine oxidase                                       | [c] : h2o + o2 + peamn -> h2o2 + nh4 + pacald                                                                     | 1.4.3.6   | Phenylalanine metabolism          | (26.1 or 314.1 or 4128.1 or 4129.1 or 314.2 )                                                                                                                                                                                                                                                                                                                                                                                    |
| PEGONCOATr    | Pseudoecgonine CoA transferase (ER)                          | [r] : atp + coa + h + pegcon -> amp + pegconcoa + ppi                                                             |           | Alkaloid biosynthesis II          |                                                                                                                                                                                                                                                                                                                                                                                                                                  |
| PEFLIP        | phosphatidylethanolamine flippase                            | atp[c] + h2o[c] + pe_hs[e] -> adp[c] + h[c] + pe_hs[c] + pi[c]                                                    |           | Transport, Extracellular          | (10396.1 or 57194.1 )                                                                                                                                                                                                                                                                                                                                                                                                            |
| PEFLIPm       | phosphatidylethanolamine flippase                            | atp[c] + h2o[c] + pe_hs[c] -> adp[c] + h[c] + pe_hs[m] + pi[c]                                                    |           | Transport, Mitochondrial          | (10396.1 or 57194.1 )                                                                                                                                                                                                                                                                                                                                                                                                            |
| PEPCK         | Phosphoenolpyruvate carboxykinase (GTP)                      | [c] : gtp + oaa -> co2 + gdp + pep                                                                                | 4.1.1.32  | Glycolysis/Gluconeogenesis        | 5105.1                                                                                                                                                                                                                                                                                                                                                                                                                           |
| PEPCKm        | Phosphoenolpyruvate carboxykinase (GTP)                      | [m] : gtp + oaa -> co2 + gdp + pep                                                                                | 4.1.1.32  | Glycolysis/Gluconeogenesis        | 5106.1                                                                                                                                                                                                                                                                                                                                                                                                                           |
| PEPLYSn       | peptide (lysine) nuclear transport via diffusion             | peplys[e] <=> peplys[n]                                                                                           |           | Transport, Nuclear                |                                                                                                                                                                                                                                                                                                                                                                                                                                  |
| PERILLYLe     | xenobiotic transport                                         | perillyl[e] <=> perillyl[c]                                                                                       |           | Transport, Extracellular          |                                                                                                                                                                                                                                                                                                                                                                                                                                  |
| PEROXx        | peroxisomal lumped long chain fatty acid oxidation           | [x] : (3) coa + (3) h2o + (3) nad + (2) o2 + priscoa -> accoa + dmoncoa + (3) h + (2) h2o2 + (3) nadh + (2) ppcoa |           | Fatty acid oxidation, peroxisome  | (30.1 and 8310.1 and 3295.1 and 1962.1 )                                                                                                                                                                                                                                                                                                                                                                                         |
| PETHCT        | phosphoethanolamine cytidyltransferase                       | [c] : ctp + ethamp + h -> cdpea + ppi                                                                             | 2.7.7.14  | Glycerophospholipid Metabolism    | 5833.1                                                                                                                                                                                                                                                                                                                                                                                                                           |
| PETOHMm_hs    | phosphatidylethanolamine N-methyltransferase                 | [m] : (3) amet + pe_hs -> (3) ahcys + (3) h + pchol_hs                                                            | 2.1.1.17  | Glycerophospholipid Metabolism    | (10400.2 or 10400.3 or 10400.1 )                                                                                                                                                                                                                                                                                                                                                                                                 |
| PETOHM_r_hs   | phosphatidylethanolamine N-methyltransferase                 | [r] : (3) amet + pe_hs -> (3) ahcys + (3) h + pchol_hs                                                            | 2.1.1.17  | Glycerophospholipid Metabolism    | (10400.2 or 10400.3 or 10400.1 )                                                                                                                                                                                                                                                                                                                                                                                                 |
| PFK           | phosphofructokinase                                          | [c] : atp + f6p -> adp + f6p + h                                                                                  | 2.7.1.11  | Glycolysis/Gluconeogenesis        | (5211.1 or 5213.1 or 5211.2 or ( 5211.1 and 5213.1 ) or 5214.1 or ( 5214.1 and 5211.1 ) or ( 5214.1 and 5211.2 ) or ( 5213.1 and 5214.1 ) )                                                                                                                                                                                                                                                                                      |

| Abbreviation | Reaction Name                                                                                                    | Reaction                                                     | E.C. #     | Pathway                                   | Gene association                                                                                        |
|--------------|------------------------------------------------------------------------------------------------------------------|--------------------------------------------------------------|------------|-------------------------------------------|---------------------------------------------------------------------------------------------------------|
| PFK26        | 6-phosphofructo-2-kinase                                                                                         | [c] : atp + f6p -> adp + f26bp + h                           | 2.7.1.105  | Fructose and Mannose Metabolism           | ( 5207.1 or 5208.1 or 5209.1 or 5210.1 )                                                                |
| PGCD         | phosphoglycerate dehydrogenase                                                                                   | [c] : 3pg + nad -> 3php + h + nadh                           | 1.1.1.95   | Glycine, Serine, and Threonine Metabolism | 26227.1                                                                                                 |
| PGDI         | Prostaglandin-H2 D-isomerase [Precursor]                                                                         | [c] : prostg2 <=> prostgd2                                   | 5.3.99.2   | Eicosanoid Metabolism                     | ( 5730.1 or 27306.1 )                                                                                   |
| PGDIr        | Prostaglandin-H2 D-isomerase [Precursor]                                                                         | [r] : prostg2 <=> prostgd2                                   | 5.3.99.2   | Eicosanoid Metabolism                     | ( 5730.1 or 27306.1 )                                                                                   |
| PGESr        | Prostaglandin E synthase                                                                                         | [r] : prostg2 <=> prostge2                                   | 5.3.99.3   | Eicosanoid Metabolism                     | ( 9536.1 or 9536.2 or 80142.1 or 80142.2 or 80142.3 or 80142.4 )                                        |
| PGI          | glucose-6-phosphate isomerase                                                                                    | [c] : g6p <=> f6p                                            | 5.3.1.9    | Glycolysis/Gluconeogenesis                | 2821.1                                                                                                  |
| PGISr        | Prostaglandin I2 synthase                                                                                        | [r] : prostg2 <=> prostgi2                                   | 5.3.99.4   | Eicosanoid Metabolism                     | 5740.1                                                                                                  |
| PGK          | phosphoglycerate kinase                                                                                          | [c] : 3pg + atp <=> 13dpg + adp                              | 2.7.2.3    | Glycolysis/Gluconeogenesis                | ( 5230.1 or 5232.1 or 348477.1 )                                                                        |
| PGL          | 6-phosphogluconolactonase                                                                                        | [c] : 6pgl + h2o -> 6pgc + h                                 | 3.1.1.31   | Pentose Phosphate Pathway                 | 25796.1                                                                                                 |
| PGLer        | 6-phosphogluconolactonase, endoplasmic reticulum                                                                 | [r] : 6pgl + h2o -> 6pgc + h                                 | 3.1.1.31   | Pentose Phosphate Pathway                 | 9563.1                                                                                                  |
| PGLYCP       | Phosphoglycolate phosphatase                                                                                     | [c] : 2pglyc + h2o -> glyct + pi                             | 3.1.3.18   | Glyoxylate and Dicarboxylate Metabolism   | 5240.1                                                                                                  |
| PGM          | phosphoglycerate mutase                                                                                          | [c] : 2pg <=> 3pg                                            | 5.4.2.1    | Glycolysis/Gluconeogenesis                | ( 5223.1 or 5224.1 or 5224.2 or 669.1 or 669.2 )                                                        |
| PGMT         | phosphoglucomutase                                                                                               | [c] : g1p <=> g6p                                            | 5.4.2.2    | Glycolysis/Gluconeogenesis                | ( 5236.1 or 5237.1 )                                                                                    |
| PGPP_hs      | Phosphatidylglycerol phosphate phosphatase (homo sapiens)                                                        | [c] : h2o + ppp_hs -> pglyc_hs + pi                          | 3.1.3.27   | Glycerophospholipid Metabolism            |                                                                                                         |
| PGPPT        | phosphatidyl-CMP: glycerophosphate phosphatidyltransferase                                                       | [c] : cdpdag_hs + glyc3p -> cmp + h + ppp_hs                 | 2.7.8.11   | Glycerophospholipid Metabolism            | 9489.1                                                                                                  |
| PGS          | Prostaglandin G/H synthase                                                                                       | [c] : arachd + h + nadph + (2) o2 -> h2o + nadp + prostg2    | 1.14.99.1  | Eicosanoid Metabolism                     | ( 5743.1 or 5742.1 )                                                                                    |
| PGSr         | Prostaglandin G/H synthase                                                                                       | [r] : arachd + h + nadph + (2) o2 -> h2o + nadp + prostg2    | 1.14.99.1  | Eicosanoid Metabolism                     | ( 5743.1 or 5742.1 )                                                                                    |
| PHACCOAGLNAC | Phenylacetyl-CoA-L-glutamine alpha-N-phenylacetyltransferase                                                     | [c] : gln-L + phaccoa -> coa + pheacgln                      | 2.3.1.14   | Phenylalanine metabolism                  |                                                                                                         |
| PHCDm        | L-1-pyrroline-3-hydroxy-5-carboxylate dehydrogenase                                                              | [m] : 1p3h5c + (2) h2o + nad -> e4hglu + h + nadh            | 1.5.1.12   | Arginine and Proline Metabolism           | ( 8659.1 or 8659.2 )                                                                                    |
| PHCHGSm      | L-1-Pyrroline-3-hydroxy-5-carboxylate spontaneous conversion to L-4-Hydroxyglutamate semialdehyde, mitochondrial | [m] : 1p3h5c + h + h2o <=> 4hglusa                           |            | Arginine and Proline Metabolism           |                                                                                                         |
| PHEACGLNt    | PHEACGLN extracellular transport via diffusion                                                                   | pheacgln[c] <=> pheacgln[e]                                  |            | Transport, Extracellular                  |                                                                                                         |
| PHEMEi       | heme transport                                                                                                   | pheme[e] -> pheme[c]                                         |            | Transport, Extracellular                  | 113235.1                                                                                                |
| PHEMEem      | Heme transport to cytosol                                                                                        | pheme[m] <=> pheme[c]                                        |            | Transport, Mitochondrial                  |                                                                                                         |
| PHEi4        | L-phenylalanine transport in via sodium symport                                                                  | na1[e] + phe-L[e] -> na1[c] + phe-L[c]                       |            | Transport, Extracellular                  | ( 11254.1 or 55089.1 or 54407.1 or 81539.1 or 6541.1 or 6542.1 or 84889.1 )                             |
| PHETA1       | phenylalanine transaminase                                                                                       | [c] : akc + phe-L <=> glu-L + phpyr                          | 2.6.1.58   | Phenylalanine metabolism                  | 2805.1                                                                                                  |
| PHETA1m      | phenylalanine transaminase (m)                                                                                   | [m] : akc + phe-L <=> glu-L + phpyr                          | 2.6.1.58   | Phenylalanine metabolism                  | ( 2806.1 or 6898.1 )                                                                                    |
| PHETec       | L-phenylalanine transport via diffusion (extracellular to cytosol)                                               | phe-L[e] <=> phe-L[c]                                        |            | Transport, Extracellular                  | ( 124935.1 or 117247.1 )                                                                                |
| PHETHPTOX2   | L-Phenylalanine,tetrahydrobiopterin:oxygen oxidoreductase (4-hydroxylating)                                      | [c] : o2 + phe-L + thbpt -> thbpt4acac + tyr-L               | 1.14.16.1  | Tyr, Phe, Trp Biosynthesis                | 5053.1                                                                                                  |
| PHYCBOXL     | L-Phenylalanine carboxy-lyase                                                                                    | [c] : h + phe-L -> co2 + peacm                               | 4.1.1.28   | Phenylalanine metabolism                  | 1644.1                                                                                                  |
| PHYHx        | Phytoyl-CoA dioxygenase, peroxisomal                                                                             | [x] : akc + o2 + phytcoa -> co2 + phyt2ohcoa + succ          | 1.14.11.18 | Fatty acid oxidation, peroxisome          | 5264.1                                                                                                  |
| PHYQt        | Phylloquinone transport                                                                                          | atp[c] + h2o[c] + phyQ[e] -> adp[c] + h[c] + phyQ[c] + pi[c] |            | Transport, Extracellular                  |                                                                                                         |
| PHYTt        | fatty acid transport via diffusion                                                                               | phyt[e] <=> phyt[c]                                          |            | Transport, Extracellular                  |                                                                                                         |
| PI345P3P     | phosphatidylinositol-3,4,5-trisphosphate 3-phosphatase                                                           | [c] : h2o + pail345p_hs -> pail45p_hs + pi                   | 3.1.3.67   | Inositol Phosphate Metabolism             | 5728.1                                                                                                  |
| PI345P3Pn    | phosphatidylinositol-3,4,5-trisphosphate 3-phosphatase, nuclear                                                  | [n] : h2o + pail345p_hs -> pail45p_hs + pi                   | 3.1.3.67   | Inositol Phosphate Metabolism             | 5728.1                                                                                                  |
| PI345P5P     | phosphatidylinositol-3,4,5-trisphosphate 5-phosphatase                                                           | [c] : h2o + pail345p_hs -> pail34p_hs + pi                   |            | Inositol Phosphate Metabolism             | ( 8867.2 or 8871.1 or 27124.1 or 27124.2 or 3632.1 or 3633.1 or 3635.1 or 56623.1 or 3636.1 or 8867.1 ) |
| PI345P5Pn    | phosphatidylinositol-3,4,5-trisphosphate 5-phosphatase, nuclear                                                  | [n] : h2o + pail345p_hs -> pail34p_hs + pi                   |            | Inositol Phosphate Metabolism             |                                                                                                         |
| PI34P3Pn     | phosphatidylinositol-3,4-bisphosphate 3-phosphatase, nuclear                                                     | [n] : h2o + pail34p_hs -> pail4p_hs + pi                     |            | Inositol Phosphate Metabolism             |                                                                                                         |
| PI34P4Pn     | phosphatidylinositol-3,4-bisphosphate 4-phosphatase, nuclear                                                     | [n] : h2o + pail34p_hs -> pail3p_hs + pi                     |            | Inositol Phosphate Metabolism             |                                                                                                         |
| PI34P5K      | phosphatidylinositol 3,4-bisphosphate 5-kinase                                                                   | [c] : atp + pail34p_hs -> adp + h + pail345p_hs              |            | Inositol Phosphate Metabolism             | ( 8394.1 or 8395.1 or 23396.1 )                                                                         |
| PI34P5Kn     | phosphatidylinositol 3,4-bisphosphate 5-kinase, nuclear                                                          | [n] : atp + pail34p_hs -> adp + h + pail345p_hs              |            | Inositol Phosphate Metabolism             |                                                                                                         |
| PI35P3P      | phosphatidylinositol-3,5-bisphosphate 3-phosphatase                                                              | [c] : h2o + pail35p_hs -> pail5p_hs + pi                     |            | Inositol Phosphate Metabolism             | ( 8897.1 or 8897.2 or 8897.3 )                                                                          |
| PI3P3Pn      | phosphatidylinositol-3-phosphate 3-phosphatase, nuclear                                                          | [n] : h2o + pail3p_hs -> pail_hs + pi                        |            | Inositol Phosphate Metabolism             |                                                                                                         |
| PI3P4K       | phosphatidylinositol 3-phosphate 4-kinase                                                                        | [c] : atp + pail3p_hs -> adp + h + pail34p_hs                |            | Inositol Phosphate Metabolism             | ( 8394.1 or 8395.1 or 23396.1 or 5297.1 or 5298.1 or 55361.1 )                                          |
| PI3P4Kn      | phosphatidylinositol 3-phosphate 4-kinase, nuclear                                                               | [n] : atp + pail3p_hs -> adp + h + pail34p_hs                |            | Inositol Phosphate Metabolism             |                                                                                                         |
| PI3P5K       | phosphatidylinositol 3-phosphate 5-kinase                                                                        | [c] : atp + pail3p_hs -> adp + h + pail35p_hs                |            | Inositol Phosphate Metabolism             | ( 8394.1 or 8395.1 or 23396.1 )                                                                         |
| PI3PP        | phosphatidylinositol-3-phosphate 3-phosphatase                                                                   | [c] : h2o + pail3p_hs -> pail_hs + pi                        |            | Inositol Phosphate Metabolism             | ( 8897.2 or 8897.1 or 8897.3 )                                                                          |

| Abbreviation | Reaction Name                                                    | Reaction                                       | E.C. #    | Pathway                        | Gene association                                                                                                                                                                                                                                                                                                                                                                                                                                                          |
|--------------|------------------------------------------------------------------|------------------------------------------------|-----------|--------------------------------|---------------------------------------------------------------------------------------------------------------------------------------------------------------------------------------------------------------------------------------------------------------------------------------------------------------------------------------------------------------------------------------------------------------------------------------------------------------------------|
| PI45P3K      | phosphatidylinositol 4,5-bisphosphate 3-kinase                   | [c] : atp + pai45p_hs --> adp + h + pai345p_hs | 2.7.1.153 | Inositol Phosphate Metabolism  | ( ( 5290.1 and 5295.3 ) or ( 5295.1 and 5291.1 ) or ( 5290.1 and 5295.1 ) or ( 5290.1 and 5295.2 ) or ( 5290.1 and 5296.1 ) or ( 5290.1 and 8503.1 ) or ( 5295.2 and 5291.1 ) or ( 5295.3 and 5291.1 ) or ( 5295.1 and 5293.1 ) or ( 5295.2 and 5293.1 ) or ( 5295.3 and 5293.1 ) or ( 5293.1 and 5296.1 ) or ( 8503.1 and 5293.1 ) or ( 5291.1 and 5296.1 ) or ( 5291.1 and 8503.1 ) or ( 23533.1 and 5294.1 ) or ( 5294.1 and 10870.1 ) )                               |
| PI45P3Kn     | phosphatidylinositol 4,5-bisphosphate 3-kinase, nuclear          | [n] : atp + pai45p_hs --> adp + h + pai345p_hs | 2.7.1.153 | Inositol Phosphate Metabolism  |                                                                                                                                                                                                                                                                                                                                                                                                                                                                           |
| PI45P4P      | phosphatidylinositol-4,5-bisphosphate 4-phosphatase              | [c] : h2o + pai45p_hs --> pai5p_hs + pi        |           | Inositol Phosphate Metabolism  |                                                                                                                                                                                                                                                                                                                                                                                                                                                                           |
| PI45P5P      | phosphatidylinositol-4,5-bisphosphate 5-phosphatase              | [c] : h2o + pai45p_hs --> pai4p_hs + pi        | 3.1.3.36  | Inositol Phosphate Metabolism  | ( 4952.1 or 4952.2 or 8871.1 or 56623.1 or 3633.1 or 8867.1 or 8867.2 )                                                                                                                                                                                                                                                                                                                                                                                                   |
| PI45P5Pn     | phosphatidylinositol-4,5-bisphosphate 5-phosphatase, nuclear     | [n] : h2o + pai45p_hs --> pai4p_hs + pi        | 3.1.3.36  | Inositol Phosphate Metabolism  |                                                                                                                                                                                                                                                                                                                                                                                                                                                                           |
| PI45PLC      | phosphatidylinositol 4,5-bisphosphate phospholipase C            | [c] : h2o + pai45p_hs --> dag_hs + h + mi145p  | 3.1.4.11  | Inositol Phosphate Metabolism  | ( 89869.1 or 113026.1 or 257068.1 or 23007.1 or 51196.1 or 5336.1 or 5332.1 or 5332.2 or 23236.1 or 23236.2 or 5331.1 or 5335.1 or 5335.2 or 5334.1 or 84812.1 or 5330.1 or 9651.1 or 5333.1 )                                                                                                                                                                                                                                                                            |
| PI45PLCn     | phosphatidylinositol 4,5-bisphosphate phospholipase C, nucleus   | [n] : h2o + pai45p_hs --> dag_hs + h + mi145p  | 3.1.4.11  | Inositol Phosphate Metabolism  | ( 23236.1 or 23236.2 )                                                                                                                                                                                                                                                                                                                                                                                                                                                    |
| PI4P3K       | phosphatidylinositol 4-phosphate 3-kinase                        | [c] : atp + pai4p_hs --> adp + h + pai34p_hs   |           | Inositol Phosphate Metabolism  | ( 5286.1 or 5287.1 or 5288.1 or ( 5290.1 and 5295.3 ) or ( 5290.1 and 5295.1 ) or ( 5290.1 and 5295.2 ) or ( 5290.1 and 5296.1 ) or ( 5290.1 and 8503.1 ) or ( 5295.1 and 5291.1 ) or ( 5295.2 and 5291.1 ) or ( 5295.3 and 5291.1 ) or ( 5291.1 and 5296.1 ) or ( 5291.1 and 8503.1 ) or ( 5295.1 and 5293.1 ) or ( 5295.2 and 5293.1 ) or ( 5295.3 and 5293.1 ) or ( 5293.1 and 5296.1 ) or ( 8503.1 and 5293.1 ) or ( 5294.1 and 10870.1 ) or ( 23533.1 and 5294.1 ) ) |
| PI4P3Ker     | phosphatidylinositol 4-phosphate 3-kinase, endoplasmic reticulum | [r] : atp + pai4p_hs --> adp + h + pai34p_hs   |           | Inositol Phosphate Metabolism  | 5287.1                                                                                                                                                                                                                                                                                                                                                                                                                                                                    |
| PI4P3Kn      | phosphatidylinositol 4-phosphate 3-kinase, nuclear               | [n] : atp + pai4p_hs --> adp + h + pai34p_hs   |           | Inositol Phosphate Metabolism  |                                                                                                                                                                                                                                                                                                                                                                                                                                                                           |
| PI4P4Pn      | phosphatidylinositol-4-phosphate 4-phosphatase, nuclear          | [n] : h2o + pai4p_hs --> pai5p_hs + pi         |           | Inositol Phosphate Metabolism  |                                                                                                                                                                                                                                                                                                                                                                                                                                                                           |
| PI4P5K       | phosphatidylinositol 4-phosphate 5-kinase                        | [c] : atp + pai4p_hs --> adp + h + pai45p_hs   | 2.7.1.68  | Glycerophospholipid Metabolism | ( 200576.1 or 200576.2 or 200576.3 or 23396.1 or 79837.1 or 5305.1 or 8395.1 or 8394.1 or 8396.1 or 8396.2 )                                                                                                                                                                                                                                                                                                                                                              |
| PI4P5Kn      | phosphatidylinositol 4-phosphate 5-kinase, nuclear               | [n] : atp + pai4p_hs --> adp + h + pai45p_hs   | 2.7.1.68  | Inositol Phosphate Metabolism  |                                                                                                                                                                                                                                                                                                                                                                                                                                                                           |
| PI4PLC       | phosphatidylinositol 4-phosphate phospholipase C                 | [c] : h2o + pai4p_hs --> dag_hs + h + mi14p    |           | Inositol Phosphate Metabolism  | ( 89869.1 or 113026.1 or 257068.1 or 5333.1 or 51196.1 or 5336.1 or 5332.1 or 5332.2 or 23236.1 or 23236.2 or 5331.1 or 5335.1 or 5335.2 or 5334.1 or 5330.1 or 9651.1 or 23007.1 or 84812.1 )                                                                                                                                                                                                                                                                            |
| PI4PLCn      | phosphatidylinositol 4-phosphate phospholipase C, nucleus        | [n] : h2o + pai4p_hs --> dag_hs + h + mi14p    |           | Inositol Phosphate Metabolism  | ( 23236.2 or 23236.1 )                                                                                                                                                                                                                                                                                                                                                                                                                                                    |
| PI4PP        | phosphatidylinositol-4-phosphate 4-phosphatase                   | [c] : h2o + pai4p_hs --> pai5p_hs + pi         |           | Inositol Phosphate Metabolism  |                                                                                                                                                                                                                                                                                                                                                                                                                                                                           |

| Abbreviation | Reaction Name                                                    | Reaction                                        | E.C. #    | Pathway                                                | Gene association                                                                                                                                                                                                                                                                                                                                                                                                                                                                                                                                                                                                                                                                                                                                                                                                                     |
|--------------|------------------------------------------------------------------|-------------------------------------------------|-----------|--------------------------------------------------------|--------------------------------------------------------------------------------------------------------------------------------------------------------------------------------------------------------------------------------------------------------------------------------------------------------------------------------------------------------------------------------------------------------------------------------------------------------------------------------------------------------------------------------------------------------------------------------------------------------------------------------------------------------------------------------------------------------------------------------------------------------------------------------------------------------------------------------------|
| PI5P3K       | phosphatidylinositol-5-phosphate 3-kinase                        | [c] : atp + pai15p_hs --> adp + h + pai135p_hs  |           | Inositol Phosphate Metabolism                          | ( 5287.1 or 5288.1 or 5289.1 or ( 5290.1 and 5295.3 ) or ( 5290.1 and 5295.1 ) or ( 5290.1 and 5295.2 ) or ( 5290.1 and 5296.1 ) or ( 5290.1 and 8503.1 ) or ( 5295.1 and 5291.1 ) or ( 5295.2 and 5291.1 ) or ( 5295.3 and 5291.1 ) or ( 5291.1 and 5296.1 ) or ( 5291.1 and 8503.1 ) or ( 5295.1 and 5293.1 ) or ( 5295.2 and 5293.1 ) or ( 5295.3 and 5293.1 ) or ( 5293.1 and 5296.1 ) or ( 8503.1 and 5293.1 ) or ( 5294.1 and 10870.1 ) or ( 23533.1 and 5294.1 ) or 5286.1 )                                                                                                                                                                                                                                                                                                                                                  |
| PI5P3Ker     | phosphatidylinositol-5-phosphate 3-kinase, endoplasmic reticulum | [r] : atp + pai15p_hs --> adp + h + pai135p_hs  |           | Inositol Phosphate Metabolism                          | 5287.1                                                                                                                                                                                                                                                                                                                                                                                                                                                                                                                                                                                                                                                                                                                                                                                                                               |
| PI5P4K       | phosphatidylinositol-5-phosphate 4-kinase                        | [c] : atp + pai15p_hs --> adp + h + pai145p_hs  | 2.7.1.149 | Inositol Phosphate Metabolism                          | ( 5297.1 or 5298.1 or 55361.1 )                                                                                                                                                                                                                                                                                                                                                                                                                                                                                                                                                                                                                                                                                                                                                                                                      |
| PI5P4Kn      | phosphatidylinositol-5-phosphate 4-kinase, nuclear               | [n] : atp + pai15p_hs --> adp + h + pai145p_hs  | 2.7.1.149 | Inositol Phosphate Metabolism                          |                                                                                                                                                                                                                                                                                                                                                                                                                                                                                                                                                                                                                                                                                                                                                                                                                                      |
| PIACGT       | phosphatidylinositol N-acetylglucosaminyltransferase             | [c] : pai1_hs + uacgam --> acgpai1_hs + h + udp | 2.4.1.198 | Glycosylphosphatidylinositol (GPI)-anchor biosynthesis | ( 5277.1 and 5277.1 and 5279.1 and 5283.1 ) or ( 5277.1 and 5279.1 and 8818.2 and 51227.1 and 5283.1 and 9091.1 ) or ( 8818.1 and 5283.1 and 5279.1 and 5277.1 and 9091.2 and 51227.1 ) or ( 8818.2 and 9091.2 and 5277.1 and 5283.1 and 5279.1 and 51227.1 ) or ( 5283.1 and 9091.1 and 5277.1 and 5279.1 and 8818.1 and 51227.2 ) or ( 5283.1 and 5277.1 and 5279.1 and 8818.2 and 9091.1 and 51227.2 ) or ( 9091.2 and 51227.2 and 5277.1 and 5279.1 and 5283.1 and 8818.1 ) or ( 5277.1 and 5279.1 and 51227.2 and 5283.1 and 9091.2 and 8818.2 ) or ( 9091.1 and 5283.1 and 51227.3 and 5279.1 and 8818.1 and 5277.1 ) or ( 9091.1 and 51227.3 and 5279.1 and 8818.2 and 5277.1 and 5279.1 and 5283.1 ) or ( 51227.3 and 5277.1 and 5279.1 and 8818.2 and 9091.2 and 5283.1 ) or ( 9091.1 and 5277.1 and 8818.1 and 51227.1 and |
| PIK3         | phosphatidylinositol 3-kinase                                    | [c] : atp + pai1_hs --> adp + h + pai13p_hs     | 2.7.1.137 | Inositol Phosphate Metabolism                          | ( 5286.1 or 5287.1 or 5288.1 or 5289.1 or ( 5290.1 and 5295.2 ) or ( 5290.1 and 5295.3 ) or ( 5290.1 and 5295.1 ) or ( 5290.1 and 5296.1 ) or ( 5290.1 and 8503.1 ) or ( 5295.1 and 5291.1 ) or ( 5295.2 and 5291.1 ) or ( 5295.3 and 5291.1 ) or ( 5291.1 and 5296.1 ) or ( 5291.1 and 8503.1 ) or ( 5295.1 and 5293.1 ) or ( 5295.2 and 5293.1 ) or ( 5295.3 and 5293.1 ) or ( 5293.1 and 5296.1 ) or ( 8503.1 and 5293.1 ) or ( 5294.1 and 10870.1 ) or ( 23533.1 and 5294.1 ) )                                                                                                                                                                                                                                                                                                                                                  |
| PIK3er       | phosphatidylinositol 3-kinase, endoplasmic reticulum             | [r] : atp + pai1_hs --> adp + h + pai13p_hs     | 2.7.1.137 | Inositol Phosphate Metabolism                          | 5287.1                                                                                                                                                                                                                                                                                                                                                                                                                                                                                                                                                                                                                                                                                                                                                                                                                               |
| PIK3n        | phosphatidylinositol 3-kinase, nuclear                           | [n] : atp + pai1_hs --> adp + h + pai13p_hs     | 2.7.1.137 | Inositol Phosphate Metabolism                          |                                                                                                                                                                                                                                                                                                                                                                                                                                                                                                                                                                                                                                                                                                                                                                                                                                      |
| PIK4         | phosphatidylinositol 4-kinase                                    | [c] : atp + pai1_hs --> adp + h + pai14p_hs     | 2.7.1.67  | Glycerophospholipid Metabolism                         | ( 5298.1 or 5297.1 or 55361.1 )                                                                                                                                                                                                                                                                                                                                                                                                                                                                                                                                                                                                                                                                                                                                                                                                      |
| PIK4n        | phosphatidylinositol 4-kinase, nuclear                           | [n] : atp + pai1_hs --> adp + h + pai14p_hs     | 2.7.1.67  | Inositol Phosphate Metabolism                          |                                                                                                                                                                                                                                                                                                                                                                                                                                                                                                                                                                                                                                                                                                                                                                                                                                      |
| PIK5         | phosphatidylinositol 5-kinase                                    | [c] : atp + pai1_hs --> adp + h + pai15p_hs     |           | Inositol Phosphate Metabolism                          | ( 8394.1 or 8395.1 or 23396.1 )                                                                                                                                                                                                                                                                                                                                                                                                                                                                                                                                                                                                                                                                                                                                                                                                      |
| PIK5n        | phosphatidylinositol 5-kinase, nuclear                           | [n] : atp + pai1_hs --> adp + h + pai15p_hs     |           | Inositol Phosphate Metabolism                          |                                                                                                                                                                                                                                                                                                                                                                                                                                                                                                                                                                                                                                                                                                                                                                                                                                      |

| Abbreviation | Reaction Name                                                               | Reaction                                                                                   | E.C. #   | Pathway                                    | Gene association                                                                                                                                                                                                                                                    |
|--------------|-----------------------------------------------------------------------------|--------------------------------------------------------------------------------------------|----------|--------------------------------------------|---------------------------------------------------------------------------------------------------------------------------------------------------------------------------------------------------------------------------------------------------------------------|
| PIPLC        | phosphatidylinositol phospholipase C                                        | [c] : h2o + pail_hs -> dag_hs + h + mi1p-D                                                 | 3.1.4.3  | Inositol Phosphate Metabolism              | ( 89869.1 or 113026.1 or 257068.1 or 5333.1 or 51196.1 or 5336.1 or 5332.1 or 5332.2 or 23236.1 or 23236.2 or 5331.1 or 5335.1 or 5335.2 or 5334.1 or 84812.1 or 5330.1 or 9651.1 or 23007.1 )                                                                      |
| PIPLCn       | phosphatidylinositol phospholipase C, nucleus                               | [n] : h2o + pail_hs -> dag_hs + h + mi1p-D                                                 | 3.1.4.3  | Inositol Phosphate Metabolism              | ( 23236.2 or 23236.1 )                                                                                                                                                                                                                                              |
| PI2m         | phosphate transporter, mitochondrial                                        | h[c] + pi[c] <=> h[m] + pi[m]                                                              |          | Transport, Mitochondrial                   | ( 5250.1 or 5250.2 or 5250.3 or 5250.4 )                                                                                                                                                                                                                            |
| PI7          | phosphate transport in/out via three Na+ symporter                          | (3) na1[e] + pi[e] <=> (3) na1[c] + pi[c]                                                  |          | Transport, Extracellular                   | ( 6569.1 or 10568.1 )                                                                                                                                                                                                                                               |
| PI7ir        | phosphate transport in/out via three Na+ symporter (irreversible)           | (3) na1[e] + pi[e] -> (3) na1[c] + pi[c]                                                   |          | Transport, Extracellular                   | ( 10786.1 or 6568.1 or 10246.1 or 10050.1 )                                                                                                                                                                                                                         |
| PI8          | phosphate transport in/out via Na+ symporter                                | (1.5) na1[e] + pi[e] <=> (1.5) na1[c] + pi[c]                                              |          | Transport, Extracellular                   | ( 6574.1 or 6575.1 )                                                                                                                                                                                                                                                |
| PI9          | phosphate transport in/out via two Na+ symporter                            | (2) na1[e] + pi[e] <=> (2) na1[c] + pi[c]                                                  |          | Transport, Extracellular                   | 142680.1                                                                                                                                                                                                                                                            |
| PIer         | phosphate transport, endoplasmic reticulum                                  | pi[r] <=> pi[c]                                                                            |          | Transport, Endoplasmic Reticular           | 2544.1                                                                                                                                                                                                                                                              |
| PIg          | phosphate transport, Golgi apparatus                                        | pi[g] <=> pi[c]                                                                            |          | Transport, Golgi Apparatus                 |                                                                                                                                                                                                                                                                     |
| PIn          | phosphate transport, nuclear                                                | pi[n] <=> pi[c]                                                                            |          | Transport, Nuclear                         |                                                                                                                                                                                                                                                                     |
| PIx          | Phosphate transporter, peroxisome                                           | pi[c] <=> pi[x]                                                                            |          | Transport, Peroxisomal                     |                                                                                                                                                                                                                                                                     |
| PLA2         | phospholipase A2                                                            | [c] : ak2gchol_hs + h2o -> Rtotal2 + h + lpchol_hs + h                                     |          | Glycerophospholipid Metabolism             |                                                                                                                                                                                                                                                                     |
| PLA2_2       | phospholipase A2                                                            | [c] : h2o + pchol_hs -> Rtotal2 + h + lpchol_hs                                            | 3.1.1.4  | Glycerophospholipid Metabolism             | ( 8398.1 or 8398.2 or 5320.1 )                                                                                                                                                                                                                                      |
| PLA2_2e      | phospholipase A2                                                            | [e] : h2o + pchol_hs -> Rtotal2 + h + lpchol_hs                                            | 3.1.1.4  | Glycerophospholipid Metabolism             | ( 64600.1 or 8399.1 or 26279.1 or 5319.1 or 81579.1 or 30814.1 or 5320.1 or 5322.1 )                                                                                                                                                                                |
| PLYSPSer     | protein lysine peptidase (endoplasmic reticulum)                            | [r] : Nmelys + h2o -> pepsls + tmls                                                        |          | Lysine Metabolism                          | ( 28972.1 and 23478.1 and 60559.1 and 90701.1 and 9789.1 )                                                                                                                                                                                                          |
| PMANM        | phosphomannomutase                                                          | [c] : man1p <=> man6p                                                                      | 5.4.2.8  | Fructose and Mannose Metabolism            | ( 5372.1 or 5373.1 or 55276.1 )                                                                                                                                                                                                                                     |
| PMEVKx       | phosphomevalonate kinase                                                    | [x] : 5pmev + atp -> 5dpmev + adp                                                          | 2.7.4.2  | Cholesterol Metabolism                     | 10654.1                                                                                                                                                                                                                                                             |
| PMI12346PH   | 5-diphosphoinositol-1,2,3,4,6-pentakisphosphate diphosphohydrolase          | [c] : h2o + ppmi12346p -> h + minohp + pi                                                  | 3.6.1.52 | Inositol Phosphate Metabolism              | ( 117283.1 or 9807.1 or 9807.2 )                                                                                                                                                                                                                                    |
| PMI12346PHn  | 5-diphosphoinositol-1,2,3,4,6-pentakisphosphate diphosphohydrolase, nuclear | [n] : h2o + ppmi12346p -> h + minohp + pi                                                  | 3.6.1.52 | Inositol Phosphate Metabolism              | ( 117283.1 or 9807.1 or 9807.2 or 51447.2 or 51447.3 or 51447.4 or 51447.5 or 51447.6 )                                                                                                                                                                             |
| PMI1346PH    | diphosphoinositol-1,3,4,6-tetrakisphosphate diphosphohydrolase              | [c] : h2o + ppmi1346p -> h + mi13456p + pi                                                 |          | Inositol Phosphate Metabolism              | ( 117283.1 or 9807.1 or 9807.2 )                                                                                                                                                                                                                                    |
| PMI1346PHn   | diphosphoinositol-1,3,4,6-tetrakisphosphate diphosphohydrolase, nucleus     | [n] : h2o + ppmi1346p -> h + mi13456p + pi                                                 |          | Inositol Phosphate Metabolism              | ( 51447.2 or 51447.3 or 51447.4 or 51447.5 or 51447.6 or 117283.1 or 9807.1 or 9807.2 or 51447.1 )                                                                                                                                                                  |
| PMTCOAtx     | fatty acid intracellular transport                                          | pmtco[c] <=> pmtco[x]                                                                      |          | Transport, Peroxisomal                     |                                                                                                                                                                                                                                                                     |
| PNP          | purine-nucleoside phosphorylase                                             | [c] : pi + rnam <=> h + ncam + r1p                                                         | 2.4.2.1  | NAD Metabolism                             | 4860.1                                                                                                                                                                                                                                                              |
| PNTEH        | Hydrolase Class ( RXN R02973)                                               | [c] : h2o + pth -> cysam + pnto-R                                                          |          | CoA Catabolism                             | ( ( 55350.1 and 8875.1 and 8876.1 ) or ( 8876.1 and 8875.2 and 55350.1 ) or ( 8876.1 and 55350.2 and 8875.1 ) or ( 8875.2 and 55350.2 and 8876.1 ) or ( 8875.1 and 8876.1 and 55350.3 ) or ( 8875.1 and 8876.1 and 55350.3 ) or ( 8875.2 and 55350.3 and 8876.1 ) ) |
| PNTK         | pantothenate kinase                                                         | [c] : atp + pnto-R -> 4ppan + adp + h                                                      | 2.7.1.33 | CoA Biosynthesis                           | ( 80025.3 or 80025.1 or 80025.2 or 80025.4 or 55229.1 or 79646.1 or 53354.1 or 53354.2 or 53354.3 )                                                                                                                                                                 |
| PNTKm        | pantothenate kinase (mitochondrial)                                         | [m] : atp + pnto-R -> 4ppan + adp + h                                                      | 2.7.1.33 | CoA Biosynthesis                           | 80025.5                                                                                                                                                                                                                                                             |
| PNT0s        | Pantothenate sodium symporter II                                            | atp[c] + h2o[c] + (2) na1[e] + pnto-R[e] -> adp[c] + h[c] + (2) na1[c] + pi[c] + pnto-R[c] |          | Transport, Extracellular                   | 8884.1                                                                                                                                                                                                                                                              |
| PPA          | inorganic diphosphatase                                                     | [c] : h2o + ppi -> h + (2) pi                                                              | 3.6.1.1  | Oxidative Phosphorylation                  | 5464.1                                                                                                                                                                                                                                                              |
| PPA2         | inorganic triphosphatase                                                    | [c] : h2o + pppi -> h + pi + ppi                                                           | 3.6.1.1  | Others                                     |                                                                                                                                                                                                                                                                     |
| PPA2m        | inorganic triphosphatase, mitochondrial                                     | [m] : h2o + pppi -> h + pi + ppi                                                           | 3.6.1.1  | Others                                     |                                                                                                                                                                                                                                                                     |
| PPAer        | inorganic diphosphatase, endoplasmic reticulum                              | [r] : h2o + ppi -> h + (2) pi                                                              | 3.6.1.1  | Miscellaneous                              | ( 2538.1 or 57818.1 or 92579.1 )                                                                                                                                                                                                                                    |
| PPAm         | inorganic diphosphatase                                                     | [m] : h2o + ppi -> h + (2) pi                                                              | 3.6.1.1  | Oxidative Phosphorylation                  | ( 27068.1 or 27068.2 or 27068.3 or 27068.4 )                                                                                                                                                                                                                        |
| PPAn         | inorganic diphosphatase, nuclear                                            | [n] : h2o + ppi -> h + (2) pi                                                              | 3.6.1.1  | Miscellaneous                              |                                                                                                                                                                                                                                                                     |
| PPAP         | phosphatidic acid phosphatase                                               | [c] : h2o + pa_hs -> dag_hs + pi                                                           | 3.1.3.4  | Triacylglycerol Synthesis                  | ( 8611.1 or 8611.2 or 8613.1 or 8612.1 )                                                                                                                                                                                                                            |
| PPAt         | Propionate transport, diffusion                                             | ppa[e] -> ppa[c]                                                                           |          | Transport, Extracellular                   |                                                                                                                                                                                                                                                                     |
| PPAtm        | Propionate transport, diffusion                                             | ppa[c] -> ppa[m]                                                                           |          | Transport, Mitochondrial                   |                                                                                                                                                                                                                                                                     |
| PPBNGS       | porphobilinogen synthase                                                    | [c] : (2) 5aop -> h + (2) h2o + ppbng                                                      | 4.2.1.24 | Heme Biosynthesis                          | ( 210.1 or 210.2 )                                                                                                                                                                                                                                                  |
| PPCDC        | phosphopantehenylcysteine decarboxylase                                     | [c] : 4ppcys + h -> co2 + pan4p                                                            | 4.1.1.36 | CoA Biosynthesis                           | 60490.1                                                                                                                                                                                                                                                             |
| PPCOACm      | Propionyl-CoA carboxylase, mitochondrial                                    | [m] : atp + hco3 + ppcoa -> adp + h + mmcoa-S + pi                                         | 6.4.1.3  | Valine, Leucine, and Isoleucine Metabolism | ( 5095.1 and 5096.1 )                                                                                                                                                                                                                                               |

| Abbreviation | Reaction Name                                                            | Reaction                                                             | E.C. #     | Pathway                                   | Gene association                                                    |
|--------------|--------------------------------------------------------------------------|----------------------------------------------------------------------|------------|-------------------------------------------|---------------------------------------------------------------------|
| PPCOAOm      | Propenyl-CoA:FAD 2,3-oxidoreductase, mitochondrial                       | [m] : fad + ppcoa -> fadh2 + prpcoa                                  | 1.3.99.3   | Propanoate Metabolism                     | ( 36.1 or 34.1 or 35.1 or 27034.1 or 2976.1 or 80724.1 or 84129.1 ) |
| PPD2CSPp     | PPD2CSPp                                                                 | [x] : 6a2ohxnt -> 1p1pdn2c + h2o                                     |            | Lysine Metabolism                         |                                                                     |
| PPDOx        | Propane-1,2-diol:NAD+ 1-oxidoreductase                                   | [c] : h + lald-D + nadh -> 12ppd-R + nad                             | 1.1.1.21   | Pyruvate Metabolism                       | 8574.1                                                              |
| PPDOy        | Propane-1,2-diol:NADP+ 1-oxidoreductase                                  | [c] : h + lald-D + nadph -> 12ppd-R + nadp                           | 1.1.1.21   | Pyruvate Metabolism                       | ( 231.1 or 10327.1 or 10327.2 or 8574.1 )                           |
| PPiIr        | Diphosphate transporter, endoplasmic reticulum                           | ppi[c] <=> ppi[r]                                                    |            | Transport, Endoplasmic Reticular          |                                                                     |
| PPiIx        | Diphosphate transporter, peroxisome                                      | ppi[c] <=> ppi[x]                                                    |            | Transport, Peroxisomal                    |                                                                     |
| PPM          | phosphopentomutase                                                       | [c] : r1p <=> r5p                                                    | 5.4.2.7    | Pentose Phosphate Pathway                 | 5236.1                                                              |
| PPMI12346Ptn | 5-diphosphatidylinositol pentakisphosphate nuclear transport (diffusion) | ppmi12346p[c] <=> pmi12346p[n]                                       |            | Transport, Nuclear                        |                                                                     |
| PPMI1346Ptn  | diphosphatidylinositol tetrakisphosphate nuclear transport (diffusion)   | ppmi1346p[c] <=> pmi1346p[n]                                         |            | Transport, Nuclear                        |                                                                     |
| PPNCL3       | phosphopantothenate-cysteine ligase                                      | [c] : 4ppan + atp + cys-L -> 4ppeys + amp + h + ppi                  | 6.3.2.5    | CoA Biosynthesis                          | 79717.1                                                             |
| PPOR         | Phenylpyruvate:oxygen oxidoreductase (hydroxylating,decarboxylating)     | [c] : o2 + phpyr -> 2hyoxplac + co2                                  | 1.13.11.27 | Phenylalanine metabolism                  | 3242.1                                                              |
| PPPG9m       | protoporphyrinogen IX mitochondrial transport                            | pppg9[c] <=> pppg9[m]                                                |            | Heme Biosynthesis                         |                                                                     |
| PPPGOm       | protoporphyrinogen oxidase, mitochondrial                                | [m] : (3) o2 + (2) pppg9 -> (6) h2o + (2) ppp9                       | 1.3.3.4    | Heme Biosynthesis                         | 5498.1                                                              |
| PPPiIn       | Inorganic triphosphate transport through nuclear pore                    | pppi[c] <=> ppp[i]                                                   |            | Transport, Nuclear                        |                                                                     |
| PRAGSr       | phosphoribosylglycinamide synthase                                       | [c] : atp + gly + pram <=> adp + gar + h + pi                        | 6.3.4.13   | IMP Biosynthesis                          | ( 2618.1 or 2618.2 )                                                |
| PRAIS        | phosphoribosylaminoimidazole synthase                                    | [c] : atp + fpram -> adp + air + (2) h + pi                          | 6.3.3.1    | IMP Biosynthesis                          | ( 2618.1 or 2618.2 )                                                |
| PRASCS       | phosphoribosylaminoimidazole succinocarboxamide synthase                 | [c] : 5aizc + asp-L + atp <=> 25aics + adp + h + pi                  | 6.3.2.6    | IMP Biosynthesis                          | 10606.1                                                             |
| PRDX         | Peroxidase (multiple substrates)                                         | [c] : h2o2 + meoh -> fald + (2) h2o                                  | 1.11.1.7   | Miscellaneous                             | 8288.1                                                              |
| PRDXI        | Peroxidase (multiple substrates)                                         | [l] : h2o2 + meoh -> fald + (2) h2o                                  | 1.11.1.7   | Miscellaneous                             | 4353.1                                                              |
| PRFGS        | phosphoribosylformylglycinamide synthase                                 | [c] : atp + fgam + glu-L + h2o -> adp + fpram + glu-L + h + pi       | 6.3.5.3    | IMP Biosynthesis                          | 5198.1                                                              |
| PRGNLONESULT | steroid sulfotransferase                                                 | [c] : paps + prgnlone -> h + pap + prgnlones                         | 2.8.2.2    | Steroid Metabolism                        | ( 6822.1 or 6820.2 )                                                |
| PRGNLONEm    | pregnenolone intracellular transport                                     | prgnlone[c] <=> prgnlone[m]                                          |            | Transport, Mitochondrial                  |                                                                     |
| PRGNLONEr    | pregnenolone intracellular transport                                     | prgnlone[c] <=> prgnlone[r]                                          |            | Transport, Endoplasmic Reticular          |                                                                     |
| PRISTANALx   | pristanal peroxisomal transport                                          | pristanal[x] <=> pristanal[c]                                        |            | Transport, Peroxisomal                    |                                                                     |
| PRISTCOAax   | pristone peroxisomal transport                                           | pristcoa[x] <=> pristcoa[c]                                          |            | Transport, Peroxisomal                    |                                                                     |
| PRISTTx      | prist peroxisomal transport                                              | prist[s] <=> prist[c]                                                |            | Transport, Peroxisomal                    |                                                                     |
| PRO1x        | proline oxidase (L-proline, NAD)                                         | [c] : nad + pro-L -> 1pyr5c + (2) h + nadh                           | 1.5.1.2    | Arginine and Proline Metabolism           | 58510.1                                                             |
| PRO1xm       | proline oxidase (NAD), mitochondrial                                     | [m] : nad + pro-L -> 1pyr5c + (2) h + nadh                           |            | Arginine and Proline Metabolism           | 5625.1                                                              |
| PROAKGOX1r   | L-Proline,2-oxoglutarate:oxygen oxidoreductase (4-hydroxylating) (ER)    | [r] : arg + o2 + pro-L -> 4hpro-LT + co2 + succ                      | 1.14.11.2  | Arginine and Proline Metabolism           | ( ( 5033.1 and 5034.1 ) or ( 8974.1 and 5034.1 ) )                  |
| PROD2        | Proline dehydrogenase                                                    | [c] : fad + pro-L -> 1pyr5c + fadh2 + h                              | 1.5.99.8   | Arginine and Proline Metabolism           | 58510.1                                                             |
| PROD2m       | Proline dehydrogenase (m)                                                | [m] : fad + pro-L -> 1pyr5c + fadh2 + h                              | 1.5.99.8   | Arginine and Proline Metabolism           | 5625.1                                                              |
| PROD12r      | D-proline reversible transport via proton symport                        | h[e] + pro-D[e] <=> h[c] + pro-D[c]                                  |            | Transport, Extracellular                  | 206358.1                                                            |
| PROD12L      | D-proline reversible transport via proton symport (lysosome)             | h[l] + pro-D[l] <=> h[c] + pro-D[c]                                  |            | Transport, Lysosomal                      | 206358.1                                                            |
| PROSTGD2t    | prostaglandin transport via bicarbonate countertransport                 | hco3[c] + prostgd2[e] <=> hco3[c] + prostgd2[c]                      |            | Transport, Extracellular                  | 6578.1                                                              |
| PROSTGE1t    | prostaglandin transport via bicarbonate countertransport                 | hco3[c] + prostge1[e] <=> hco3[c] + prostge1[c]                      |            | Transport, Extracellular                  | 6578.1                                                              |
| PROSTGE1t3   | prostaglandine E1 transport (ATP-dependent)                              | atp[c] + h2o[c] + prostge1[c] -> adp[c] + h[c] + pi[c] + prostge1[e] |            | Transport, Extracellular                  | 10257.1                                                             |
| PROSTGE2t    | prostaglandin transport via bicarbonate countertransport                 | hco3[c] + prostge2[e] <=> hco3[c] + prostge2[c]                      |            | Transport, Extracellular                  | ( 6578.1 or 6579.1 or 28232.1 or 28231.1 )                          |
| PROSTGE2i2   | prostaglandin uniport                                                    | prostge2[e] <=> prostge2[c]                                          |            | Transport, Extracellular                  | ( 6582.2 or 6580.1 or 6582.1 )                                      |
| PROSTGE2i3   | prostaglandine E2 transport (ATP-dependent)                              | atp[c] + h2o[c] + prostge2[c] -> adp[c] + h[c] + pi[c] + prostge2[e] |            | Transport, Extracellular                  | 10257.1                                                             |
| PROSTGF2t    | prostaglandin uniport                                                    | prostgf2[e] <=> prostgf2[c]                                          |            | Transport, Extracellular                  | ( 6582.2 or 6580.1 or 6582.1 )                                      |
| PRO12r       | L-proline reversible transport via proton symport                        | h[e] + pro-L[e] <=> h[c] + pro-L[c]                                  |            | Transport, Extracellular                  | 206358.1                                                            |
| PRO12L       | L-proline reversible transport via proton symport (lysosome)             | h[l] + pro-L[l] <=> h[c] + pro-L[c]                                  |            | Transport, Lysosomal                      | 206358.1                                                            |
| PRO4         | Na+/Proline-L symporter                                                  | na1[e] + pro-L[e] -> na1[c] + pro-L[c]                               |            | Transport, Extracellular                  | ( 55089.1 or 54407.1 or 81539.1 )                                   |
| PRO4(2)r     | Proline transport (sodium symport) (2:1)                                 | (2) na1[e] + pro-L[e] <=> (2) na1[c] + pro-L[c]                      |            | Transport, Extracellular                  | 6534.1                                                              |
| PRO4m        | L-proline transport, mitochondrial                                       | pro-L[c] <=> pro-L[m]                                                |            | Transport, Mitochondrial                  |                                                                     |
| PRPNCOAHYDm  | Propenyl-CoA hydrolase (m)                                               | [m] : h2o + prpcoa -> 3hpcoa                                         | 4.2.1.17   | beta-Alanine metabolism                   | ( 1892.1 or 549.1 or ( 3032.1 and 3030.1 ) )                        |
| PRPNCOAHYDx  | Propenyl-CoA hydrolase (x)                                               | [x] : h2o + prpcoa -> 3hpcoa                                         | 4.2.1.17   | beta-Alanine metabolism                   | 1962.1                                                              |
| PRPPS        | phosphoribosylpyrophosphate synthetase                                   | [c] : atp + r5p <=> amp + h + prpp                                   | 2.7.6.1    | Pentose Phosphate Pathway                 | ( 5631.1 or 5634.1 or 221823.1 or 221823.2 )                        |
| PS_HSter     | phosphatidylserine scramblase                                            | ps_hs[c] <=> ps_hs[r]                                                |            | Transport, Endoplasmic Reticular          |                                                                     |
| PS_HStg      | phosphatidylserine scramblase                                            | ps_hs[c] <=> ps_hs[g]                                                |            | Transport, Golgi Apparatus                |                                                                     |
| PSDm_hs      | Phosphatidylserine decarboxylase                                         | [m] : h + ps_hs -> co2 + pe_hs                                       | 4.1.1.65   | Glycerophospholipid Metabolism            | 23761.1                                                             |
| PSERT        | phosphoserine transaminase                                               | [c] : 3php + glu-L -> akp + pser-L                                   | 2.6.1.52   | Glycine, Serine, and Threonine Metabolism | ( 29968.1 or 29968.2 )                                              |
| PSFLIP       | phosphatidylserine flippase                                              | atp[c] + h2o[c] + ps_hs[c] -> adp[c] + h[c] + pi[c] + ps_hs[c]       |            | Transport, Extracellular                  | ( 10396.1 or 57194.1 )                                              |
| PSFLIPm      | phosphatidylserine flippase                                              | atp[c] + h2o[c] + ps_hs[c] -> adp[c] + h[c] + pi[c] + ps_hs[m]       |            | Transport, Mitochondrial                  | ( 10396.1 or 57194.1 )                                              |
| PSP_L        | phosphoserine phosphatase (L-serine)                                     | [c] : h2o + pser-L -> pi + ser-L                                     | 3.1.3.3    | Glycine, Serine, and Threonine Metabolism | ( 5723.1 or 8781.1 )                                                |
| PSSA1_hs     | Phosphatidylserine synthase homo sapiens                                 | [c] : pchol_hs + ser-L <=> chol + ps_hs                              | 2.7.8.8    | Glycerophospholipid Metabolism            | 9791.1                                                              |
| PSSA2_hs     | Phosphatidylserine synthase homo sapiens                                 | [c] : pe_hs + ser-L <=> etha + ps_hs                                 | 2.7.8.8    | Glycerophospholipid Metabolism            | 81490.1                                                             |
| PTDCACRNCPT1 | carnitine fatty-acyl transferase                                         | [c] : crn + ptdecoa -> coa + ptdeacrnc                               | 2.3.1.21   | Carnitine shuttle                         | ( 1375.3 or 126129.1 or 1374.1 or 1375.4 or 1375.2 or 1375.1 )      |
| PTDCACRNCPT2 | pentadecanoate transport into the mitochondria                           | [m] : coa + ptdeacrnc -> crn + ptdeacoa                              |            | Carnitine shuttle                         | 1376.1                                                              |
| PTDCACRnI    | pentadecanoate transport into the mitochondria                           | ptdeacrnc[c] -> ptdeacrnc[m]                                         |            | Carnitine shuttle                         | 788.1                                                               |
| PTDCAI       | fatty acid transport via diffusion                                       | ptdca[e] <=> ptdca[c]                                                |            | Transport, Extracellular                  |                                                                     |



| Abbreviation | Reaction Name                                                    | Reaction                                                         | E.C. #    | Pathway                                  | Gene association                                                                |
|--------------|------------------------------------------------------------------|------------------------------------------------------------------|-----------|------------------------------------------|---------------------------------------------------------------------------------|
| PTE2x        | peroxisomal acyl-CoA thioesterase                                | [x]: h2o + pmcoa -> coa + h + hdca                               |           | Fatty Acid Metabolism                    | (10005.1 or 10005.2 or 10005.3 or 10965.1)                                      |
| PTE3x        | peroxisomal acyl-CoA thioesterase                                | [x]: h2o + pristcoa -> coa + h + prist                           |           | Fatty Acid Metabolism                    | 10965.1                                                                         |
| PTE4x        | peroxisomal acyl-CoA thioesterase                                | [x]: h2o + phytcoa -> coa + h + phyt                             |           | Fatty Acid Metabolism                    | 10965.1                                                                         |
| PTE5x        | peroxisomal acyl-CoA thioesterase                                | [x]: admcoa + h2o -> adm + coa + h                               |           | Fatty Acid Metabolism                    | 10965.1                                                                         |
| PTHPS        | 6-pyruvoyltetrahydropterin synthase                              | [c]: ahdt -> 6phtp + pppi                                        | 4.2.3.12  | Tetrahydrobiopterin                      | 5805.1                                                                          |
| PTHPSn       | 6-pyruvoyltetrahydropterin synthase, nuclear                     | [n]: ahdt -> 6phtp + pppi                                        | 4.2.3.12  | Tetrahydrobiopterin                      | 5805.1                                                                          |
| PTPAT        | putrescine-phosphate adenylyltransferase                         | [c]: atp + h + pan4p <=> dpcoa + ppi                             | 2.7.7.3   | CoA Biosynthesis                         | 80347.1                                                                         |
| PTRCAT1      | Putrescine acetyltransferase                                     | [c]: accoa + ptrc -> aprut + coa + h                             | 2.3.1.57  | Arginine and Proline Metabolism          | (6303.1 or 112483.1)                                                            |
| PTRCOX1      | Putrescine:oxygen oxidoreductase (deaminating)                   | [c]: h2o + o2 + ptrc -> 4abutu + h2o2 + nh4                      | 1.4.3.6   | Arginine and Proline Metabolism          | (314.1 or 314.2 or 8639.1 or 26.1)                                              |
| PUNP1        | purine-nucleoside phosphorylase (Adenosine)                      | [c]: adn + pi <=> ade + r1p                                      | 2.4.2.1   | Nucleotides                              | 4860.1                                                                          |
| PUNP2        | purine-nucleoside phosphorylase (Deoxyadenosine)                 | [c]: dad-2 + pi <=> 2dr1p + ade                                  | 2.4.2.1   | Purine Catabolism                        | 4860.1                                                                          |
| PUNP3        | purine-nucleoside phosphorylase (Guanosine)                      | [c]: gsn + pi <=> gua + r1p                                      | 2.4.2.1   | Purine Catabolism                        | 4860.1                                                                          |
| PUNP4        | purine-nucleoside phosphorylase (Deoxyguanosine)                 | [c]: dgsn + pi <=> 2dr1p + gua                                   | 2.4.2.1   | Purine Catabolism                        | 4860.1                                                                          |
| PUNP5        | purine-nucleoside phosphorylase (Inosine)                        | [c]: ins + pi <=> hxn + r1p                                      | 2.4.2.1   | Purine Catabolism                        | 4860.1                                                                          |
| PUNP6        | purine-nucleoside phosphorylase (Deoxyinosine)                   | [c]: din + pi <=> 2dr1p + hxan                                   | 2.4.2.1   | Purine Catabolism                        | 4860.1                                                                          |
| PUNP7        | purine-nucleoside phosphorylase (Xanthosine)                     | [c]: pi + xtsn <=> r1p + xan                                     | 2.4.2.1   | Nucleotides                              | 4860.1                                                                          |
| PVD3         | Previtamin D3 formation                                          | [c]: 7dhcsterol <=> pd3                                          |           | Vitamin D                                |                                                                                 |
| PYAM5POr     | pyridoxamine 5'-phosphate oxidase                                | [c]: h2o + o2 + pyam5p <=> h2o2 + nh4 + pydx5p                   | 1.4.3.5   | Vitamin B6 Metabolism                    | 55163.1                                                                         |
| PYAM5Pm      | Pyridoxamine 5'-phosphate transport via diffusion, mitochondrial | pyam5p[c] <=> pyam5p[m]                                          |           | Transport, Mitochondrial                 |                                                                                 |
| PYDAMK       | pyridoxamine kinase                                              | [c]: atp + pydam -> adp + h + pyam5p                             | 2.7.1.35  | Vitamin B6 Metabolism                    | 8566.1                                                                          |
| PYDAMr       | pyridoxamine transport via diffusion                             | pydam[e] <=> pydam[c]                                            |           | Transport, Extracellular                 |                                                                                 |
| PYDX5Pm      | Pyridoxal 5'-phosphate transport via diffusion, mitochondrial    | pydx5p[c] <=> pydx5p[m]                                          |           | Transport, Mitochondrial                 |                                                                                 |
| PYDXDH       | pyridoxal dehydrogenase                                          | [c]: h2o + o2 + pydx -> 4pyrdx + h2o2                            | 1.2.3.1   | Vitamin B6 Metabolism                    | 316.1                                                                           |
| PYDXK        | pyridoxal kinase                                                 | [c]: atp + pydx -> adp + h + pydx5p                              | 2.7.1.35  | Vitamin B6 Metabolism                    | 8566.1                                                                          |
| PYDXNK       | pyridoxine kinase                                                | [c]: atp + pydxn -> adp + h + pdx5p                              | 2.7.1.35  | Vitamin B6 Metabolism                    | 8566.1                                                                          |
| PYDXNr       | pyridoxine transport via diffusion                               | pydxn[e] <=> pydxn[c]                                            |           | Transport, Extracellular                 |                                                                                 |
| PYDXPP       | Pyridoxal 5-phosphate phosphatase                                | [c]: h2o + pydx5p -> pi + pydx                                   |           | Vitamin B6 Metabolism                    | 57026.1                                                                         |
| PYDXr        | pyridoxal transport via diffusion                                | pydx[e] <=> pydx[c]                                              |           | Transport, Extracellular                 |                                                                                 |
| PYK          | pyruvate kinase                                                  | [c]: adp + h + pep -> atp + pyr                                  | 2.7.1.40  | Glycolysis/Gluconeogenesis               | (5313.1 or 5313.2 or 5315.1 or 5315.2 or 5315.3 or 113452.1)                    |
| PYLALDOX     | Perillyl aldehyde:NAD+ oxidoreductase                            | [c]: h2o + nad + pylald -> (2) h + nadh + peracd                 | 1.2.1.3   | Limonene and pinene degradation          | (216.1 or 223.1 or 224.1 or 501.1 or 8854.1 or 8854.2 or 8854.3)                |
| PYLALDOXm    | Perillyl aldehyde:NAD+ oxidoreductase (m)                        | [m]: h2o + nad + pylald -> (2) h + nadh + peracd                 | 1.2.1.3   | Limonene and pinene degradation          | (217.1 or 219.1 or 8659.1 or 8659.2)                                            |
| PYNP2r       | pyrimidine-nucleoside phosphorylase (uracil)                     | [c]: pi + uri <=> r1p + ura                                      | 2.4.2.2   | Pyrimidine Catabolism                    | (7378.2 or 7378.1 or 151531.1)                                                  |
| PYRt2m       | pyruvate mitochondrial transport via proton symport              | h[c] + pyr[c] <=> h[m] + pyr[m]                                  |           | Transport, Mitochondrial                 | 6566.1                                                                          |
| PYRt2p       | pyruvate peroxisomal transport via proton symport                | h[c] + pyr[c] <=> h[x] + pyr[x]                                  |           | D-alanine metabolism                     | (6566.1 or 9194.1)                                                              |
| PYRt2r       | pyruvate reversible transport via proton symport                 | h[e] + pyr[e] <=> h[c] + pyr[c]                                  |           | Transport, Extracellular                 | (6566.1 or 9194.1 or 9123.1)                                                    |
| QUILSYN      | Quinolinate Synthase (Eukaryotic)                                | [c]: cmusa -> h + h2o + quln                                     |           | Tryptophan metabolism                    |                                                                                 |
| RADH         | retinal dehydrogenase                                            | [c]: h2o + nad + retinal <=> (2) h + nadh + retn                 |           | Vitamin A Metabolism                     |                                                                                 |
| RADH2        | retinal dehydrogenase (NADPH)                                    | [c]: h2o + nadp + retinal <=> (2) h + nadph + retn               |           | Vitamin A Metabolism                     |                                                                                 |
| RADH3        | retinal dehydrogenase                                            | [c]: h2o + nad + retinal-cis-13 <=> 13-cis-retn + (2) h + nadh   |           | Vitamin A Metabolism                     |                                                                                 |
| RADH4        | retinal dehydrogenase (NADPH)                                    | [c]: h2o + nadp + retinal-cis-13 <=> 13-cis-retn + (2) h + nadph |           | Vitamin A Metabolism                     |                                                                                 |
| RAHY         | retinoic acid hydroxylation (P450)                               | [c]: h + nadph + o2 + retn -> h2o + hretn + nadp                 |           | Vitamin A Metabolism                     |                                                                                 |
| RAI1         | retinal isomerase (11-cis)                                       | [c]: retinal <=> retinal-11-cis                                  | 5.2.1.3   | Vitamin A Metabolism                     |                                                                                 |
| RAI2         | retinal isomerase (9-cis)                                        | [c]: retinal <=> retinal-cis-9                                   | 5.2.1.3   | Vitamin A Metabolism                     |                                                                                 |
| RAI3         | 13-cis-retinoic acid isomerase                                   | [c]: retn <=> 13-cis-retn                                        |           | Vitamin A Metabolism                     | (2944.1 or 2944.2)                                                              |
| RAI4         | 13-cis-4-oxo-retinoic acid isomerase                             | [c]: oretn <=> 13-cis-oretn                                      |           | Vitamin A Metabolism                     |                                                                                 |
| RAm          | Retinoate transport, nuclear                                     | retn[c] <=> retn[n]                                              |           | Transport, Nuclear                       |                                                                                 |
| RAm3         | 13-cis-retinoic acid transport, nuclear                          | 13-cis-retn[c] <=> 13-cis-retn[n]                                |           | Transport, Nuclear                       |                                                                                 |
| RBFK         | riboflavin kinase                                                | [c]: atp + ribflv -> adp + fmn + h                               | 2.7.1.26  | Riboflavin Metabolism                    | 55312.1                                                                         |
| RBK          | ribokinase                                                       | [c]: atp + rib-D -> adp + h + r5p                                | 2.7.1.15  | Pentose Phosphate Pathway                | 64080.1                                                                         |
| RBK_D        | D-ribulokinase                                                   | [c]: atp + rib-D -> adp + h + ru5p-D                             | 2.7.1.47  | Pentose and Glucuronate Interconversions |                                                                                 |
| RBT1         | ribitol transport via passive diffusion                          | rbt[c] -> rbt[e]                                                 |           | Transport, Extracellular                 |                                                                                 |
| RDH1         | retinol dehydrogenase (all-trans)                                | [c]: nad + retinol <=> h + nadh + retinal                        | 1.1.1.105 | Vitamin A Metabolism                     | (8608.1 or 5959.1)                                                              |
| RDH1a        | retinol dehydrogenase (all-trans,NADPH)                          | [c]: nadp + retinol <=> h + nadph + retinal                      | 1.1.1.105 | Vitamin A Metabolism                     | (145226.1 or 57665.1 or 51109.1 or 112724.1 or 50700.1 or 157506.1 or 195814.1) |
| RDH2         | retinol dehydrogenase (9-cis,NADH)                               | [c]: nad + retinol-9-cis <=> h + nadh + retinal-cis-9            | 1.1.1.105 | Vitamin A Metabolism                     | 5959.1                                                                          |
| RDH2a        | retinol dehydrogenase (9-cis,NADPH)                              | [c]: nadp + retinol-9-cis <=> h + nadph + retinal-cis-9          | 1.1.1.105 | Vitamin A Metabolism                     | (145226.1 or 57665.1 or 51109.1 or 112724.1 or 50700.1 or 195814.1)             |
| RDH3         | retinol dehydrogenase (11-cis,NADH)                              | [c]: nad + retinol-cis-11 <=> h + nadh + retinal-11-cis          | 1.1.1.105 | Vitamin A Metabolism                     | 5959.1                                                                          |
| RDH3a        | retinol dehydrogenase (11-cis,NADPH)                             | [c]: nadp + retinol-cis-11 <=> h + nadph + retinal-11-cis        | 1.1.1.105 | Vitamin A Metabolism                     | (145226.1 or 57665.1 or 51109.1 or 112724.1 or 195814.1)                        |
| RDH4         | retinol dehydrogenase (13-cis,NADH)                              | [c]: nad + retinol-cis-13 <=> h + nadh + retinal-cis-13          | 1.1.1.105 | Vitamin A Metabolism                     | 5959.1                                                                          |
| RETFA        | retinol acyltransferase                                          | [c]: Rtotal2coa + retinol -> coa + retfa                         | 2.3.1.76  | Vitamin A Metabolism                     |                                                                                 |
| RETFAr       | fatty acid retinol efflux                                        | retfa[c] -> retfa[e]                                             |           | Transport, Extracellular                 |                                                                                 |

| Abbreviation    | Reaction Name                                                   | Reaction                                                           | E.C. #   | Pathway                                    | Gene association                                                                                                 |
|-----------------|-----------------------------------------------------------------|--------------------------------------------------------------------|----------|--------------------------------------------|------------------------------------------------------------------------------------------------------------------|
| RETFa1          | fatty acid retinol efflux (9-cis)                               | 9-cis-retfa[c] --> 9-cis-retfa[e]                                  |          | Transport, Extracellular                   |                                                                                                                  |
| RETFa2          | fatty acid retinol efflux (11-cis)                              | 11-cis-retfa[c] --> 11-cis-retfa[e]                                |          | Transport, Extracellular                   |                                                                                                                  |
| RETH            | retinyl ester hydrolase                                         | [c]: h2o + retfa --> Rtotal2 + h + retinol                         |          | Vitamin A Metabolism                       | 8228.1                                                                                                           |
| RETH1           | retinyl ester hydrolase (9-cis)                                 | [c]: 9-cis-retfa + h2o --> Rtotal2 + h + retinol-9-cis             |          | Vitamin A Metabolism                       |                                                                                                                  |
| RETH1e          | retinyl ester hydrolase (9-cis), extracellular                  | [e]: 9-cis-retfa + h2o --> Rtotal2 + h + retinol-9-cis             |          | Vitamin A Metabolism                       |                                                                                                                  |
| RETH2           | retinyl ester hydrolase (11-cis)                                | [c]: 11-cis-retfa + h2o --> Rtotal2 + h + retinol-cis-11           |          | Vitamin A Metabolism                       |                                                                                                                  |
| RETH2e          | retinyl ester hydrolase (11-cis), extracellular                 | [e]: 11-cis-retfa + h2o --> Rtotal2 + h + retinol-cis-11           |          | Vitamin A Metabolism                       |                                                                                                                  |
| RETHE           | retinyl ester hydrolase, extracellular                          | [e]: h2o + retfa --> Rtotal2 + h + retinol                         |          | Vitamin A Metabolism                       |                                                                                                                  |
| RETI1           | retinol isomerase (11-cis)                                      | [c]: retinol <=> retinol-cis-11                                    | 5.2.1.7  | Vitamin A Metabolism                       |                                                                                                                  |
| RETI2           | retinol isomerase (9-cis)                                       | [c]: retinol <=> retinol-9-cis                                     | 5.2.1.7  | Vitamin A Metabolism                       |                                                                                                                  |
| RETI3           | retinol isomerase (13-cis)                                      | [c]: retinol <=> retinol-cis-13                                    | 5.2.1.7  | Vitamin A Metabolism                       |                                                                                                                  |
| RETNCOA         | Retinoyl CoA formation                                          | [c]: atp + coa + retn --> amp + ppi + retmcoa                      |          | Vitamin A Metabolism                       |                                                                                                                  |
| RETNGLC1        | retinoyl glucuronide efflux                                     | retnglc[c] --> retnglc[e]                                          |          | Transport, Extracellular                   |                                                                                                                  |
| RETNGLC2        | retinoyl glucuronide efflux (13-cis)                            | 13-cis-retnglc[c] --> 13-cis-retnglc[e]                            |          | Transport, Endoplasmic Reticular           |                                                                                                                  |
| RETNGLC2r       | retinoyl glucuronide efflux (13-cis) from ER                    | 13-cis-retnglc[r] --> 13-cis-retnglc[e]                            |          | Transport, Endoplasmic Reticular           |                                                                                                                  |
| RETNGLCcr       | retinoyl glucuronide efflux from ER                             | retnglc[r] --> retnglc[e]                                          |          | Transport, Endoplasmic Reticular           |                                                                                                                  |
| RETNt           | retinoic acid transport                                         | retn[c] <=> retn[e]                                                |          | Transport, Extracellular                   |                                                                                                                  |
| RETNr           | retinoic acid transport in ER                                   | retn[c] --> retn[r]                                                |          | Transport, Endoplasmic Reticular           |                                                                                                                  |
| RETNr2          | retinoic acid transport in ER (13-cis)                          | 13-cis-retn[c] --> 13-cis-retn[r]                                  |          | Transport, Endoplasmic Reticular           |                                                                                                                  |
| RETV            | Retinol transport via facilitated diffusion                     | retinol[e] --> retinol[c]                                          |          | Transport, Extracellular                   |                                                                                                                  |
| RIBFLV3         | riboflavin transport (ATP dependent)                            | atp[c] + h2o[c] + ribflv[c] --> adp[c] + h[c] + pi[c] + ribflv[c]  |          | Transport, Extracellular                   |                                                                                                                  |
| RIBt            | ribose transport via diffusion                                  | rib-D[e] <=> rib-D[c]                                              |          | Transport, Extracellular                   |                                                                                                                  |
| RIBr            | ribose transport in via proton symporter                        | h[e] + rib-D[e] --> h[c] + rib-D[c]                                |          | Transport, Extracellular                   |                                                                                                                  |
| RNDR1           | ribonucleoside-diphosphate reductase (ADP)                      | [c]: adp + trdr --> dudp + h2o + trdox                             | 1.17.4.1 | Nucleotides                                | ( 6240.1 and 6241.1 )                                                                                            |
| RNDR2           | ribonucleoside-diphosphate reductase (GDP)                      | [c]: gdp + trdr --> dudp + h2o + trdox                             | 1.17.4.1 | Nucleotides                                | ( 6240.1 and 6241.1 )                                                                                            |
| RNDR3           | ribonucleoside-diphosphate reductase (CDP)                      | [c]: cdp + trdr --> dudp + h2o + trdox                             | 1.17.4.1 | Nucleotides                                | ( 6240.1 and 6241.1 )                                                                                            |
| RNDR4           | ribonucleoside-diphosphate reductase (UDP)                      | [c]: urdp + trdr --> dudp + h2o + trdox                            | 1.17.4.1 | Nucleotides                                | ( 6240.1 and 6241.1 )                                                                                            |
| RNMK            | ribosylsuccinamide kinase                                       | [c]: atp + rnam --> adp + h + rnm                                  | 2.7.1.22 | NAD Metabolism                             | 54981.1                                                                                                          |
| RPE             | ribulose 5-phosphate 3-epimerase                                | [c]: ru5p-D <=> xu5p-D                                             | 5.1.3.1  | Pentose Phosphate Pathway                  | ( 6120.1 or 6120.2 )                                                                                             |
| RPI             | ribulose 5-phosphate isomerase                                  | [c]: r5p <=> ru5p-D                                                | 5.3.1.6  | Pentose Phosphate Pathway                  | 22934.1                                                                                                          |
| RTOT_2          | R total flux 2 position                                         | [c]: R2coa_hs + R4coa_hs --> (2) Rtotal2coa                        |          | R Group Synthesis                          |                                                                                                                  |
| RTOT_3          | R total flux 3 position                                         | [c]: R1coa_hs + R2coa_hs --> (2) Rtotal3coa                        |          | R Group Synthesis                          |                                                                                                                  |
| RTOT1           | R total flux                                                    | [c]: R1coa_hs --> Rtotalcoa                                        |          | R Group Synthesis                          |                                                                                                                  |
| RTOT2           | R total flux                                                    | [c]: R2coa_hs --> Rtotalcoa                                        |          | R Group Synthesis                          |                                                                                                                  |
| RTOT3           | R total flux                                                    | [c]: R3coa_hs --> Rtotalcoa                                        |          | R Group Synthesis                          |                                                                                                                  |
| RTOT4           | R total flux                                                    | [c]: R4coa_hs --> Rtotalcoa                                        |          | R Group Synthesis                          |                                                                                                                  |
| RTOT5           | R total flux                                                    | [c]: R5coa_hs --> Rtotalcoa                                        |          | R Group Synthesis                          |                                                                                                                  |
| RTOT6           | R total flux                                                    | [c]: R6coa_hs --> Rtotalcoa                                        |          | R Group Synthesis                          |                                                                                                                  |
| RTOTAL2CRNCPT1  | carnitine fatty-acyl transferase                                | [c]: Rtotal2coa + crn --> Rtotal2crn + coa                         | 2.3.1.21 | Carnitine shuttle                          | ( 1375.3 or 126129.1 or 1374.1 or 1375.4 or 1375.2 or 1375.1 )                                                   |
| RTOTAL2CRNCPT2  | R group transport into the mitochondria                         | [m]: Rtotal2crn + coa --> Rtotal2coa + crn                         |          | Carnitine shuttle                          | 1376.1                                                                                                           |
| RTOTAL2CRNt     | R group transport into the mitochondria                         | Rtotal2crn[c] --> Rtotal2crn[m]                                    |          | Carnitine shuttle                          | 788.1                                                                                                            |
| RTOTAL3CRNCPT1  | carnitine fatty-acyl transferase                                | [c]: Rtotal3coa + crn --> Rtotal3crn + coa                         | 2.3.1.21 | Carnitine shuttle                          | ( 1375.1 or 126129.1 or 1374.1 or 1375.4 or 1375.2 or 1375.1 )                                                   |
| RTOTAL3CRNCPT2  | R group transport into the mitochondria                         | [m]: Rtotal3crn + coa --> Rtotal3coa + crn                         |          | Carnitine shuttle                          | 1376.1                                                                                                           |
| RTOTAL3CRNt     | R group transport into the mitochondria                         | Rtotal3crn[c] --> Rtotal3crn[m]                                    |          | Carnitine shuttle                          | 788.1                                                                                                            |
| RTOTALCRNCPT1   | carnitine fatty-acyl transferase                                | [c]: Rtotalcoa + crn --> Rtotalcrn + coa                           | 2.3.1.21 | Carnitine shuttle                          | ( 1375.3 or 126129.1 or 1374.1 or 1375.4 or 1375.2 or 1375.1 )                                                   |
| RTOTALCRNCPT2   | R group transport into the mitochondria                         | [m]: Rtotalcrn + coa --> Rtotalcoa + crn                           |          | Carnitine shuttle                          | 1376.1                                                                                                           |
| RTOTALCRNt      | R group transport into the mitochondria                         | Rtotalcrn[c] --> Rtotalcrn[m]                                      |          | Carnitine shuttle                          | 788.1                                                                                                            |
| Rtotali         | fatty acid intracellular transport                              | Rtotal[i] <=> Rtotal[l]                                            |          | Transport, Lysosomal                       |                                                                                                                  |
| Rtotalp         | fatty acid intracellular transport                              | Rtotal[c] <=> Rtotal[g]                                            |          | Transport, Peroxisomal                     |                                                                                                                  |
| S23T2g          | beta-galactoside alpha-2,3-sialyltransferase (core 2)           | [g]: cmpacna + core2 --> cmp + h + ksii_core2_pre1                 | 2.4.99.4 | Keratan sulfate biosynthesis               | ( 6482.1 or 6482.2 or 6483.1 or 6484.1 )                                                                         |
| S23T3g          | beta-galactoside alpha-2,3-sialyltransferase (complex N-glycan) | [g]: cmpacna + l2fn2m2masn --> cmp + h + ksi_pre1                  | 2.4.99.6 | Keratan sulfate biosynthesis               | ( 6487.1 or 6487.10 or 6487.11 or 6487.2 or 6487.3 or 6487.4 or 6487.6 or 6487.5 or 6487.7 or 6487.8 or 6487.9 ) |
| S23T4g          | beta-galactoside alpha-2,3-sialyltransferase                    | [g]: cmpacna + ksii_core4_pre1 --> cmp + h + ksii_core4_pre2       | 2.4.99.4 | Keratan sulfate biosynthesis               | ( 6482.1 or 6482.2 or 6483.1 or 6484.1 )                                                                         |
| S23Tg           | beta-galactoside alpha-2,3-sialyltransferase (T antigen)        | [g]: T_antigen + cmpacna --> cmp + h + sT_antigen                  | 2.4.99.4 | O-Glycan Biosynthesis                      | ( 6482.2 or 6482.1 )                                                                                             |
| S26Tg           | beta-galactoside alpha-2,6-sialyltransferase                    | [g]: (2) cmpacna + l2fn2m2masn --> (2) cmp + (2) h + s2l2fn2m2masn | 2.4.99.1 | N-Glycan Biosynthesis                      | ( 6480.1 or 6480.2 or 6480.3 )                                                                                   |
| S2L2FN2M2MASNt  | s2l2fn2m2masn transport, Golgi to extracellular                 | s2l2fn2m2masn[g] --> s2l2fn2m2masn[e]                              |          | Transport, Extracellular                   |                                                                                                                  |
| S2L2FN2M2MASNly | s2l2fn2m2masn transport, extracellular to lysosome              | s2l2fn2m2masn[e] --> s2l2fn2m2masn[l]                              |          | Transport, Lysosomal                       |                                                                                                                  |
| S2L2N2M2MASNly  | s2l2n2m2masn transport, extracellular to lysosome               | s2l2n2m2masn[e] --> s2l2n2m2masn[l]                                |          | Transport, Lysosomal                       |                                                                                                                  |
| S2T1g           | chondroitin 2-sulfotransferase, Golgi                           | [g]: cs_c_d_e_pre1 + paps --> cs_d_pre2 + h + pap                  |          | Chondroitin / heparan sulfate biosynthesis | 10090.1                                                                                                          |
| S2T2g           | chondroitin 2-sulfotransferase, Golgi                           | [g]: cs_d_pre5 + paps --> cs_pg_d + h + pap                        |          | Chondroitin / heparan sulfate biosynthesis | 10090.1                                                                                                          |
| S2T3g           | uronyl 2-sulfotransferase, Golgi                                | [g]: cs_b_pre5 + paps --> cs_pg_b + h + pap                        |          | Chondroitin / heparan sulfate biosynthesis | 10090.1                                                                                                          |
| S2T4g           | uronyl 2-sulfotransferase, Golgi                                | [g]: hs_pre11 + (2) paps --> (2) h + hs_pre12 + (2) pap            |          | Chondroitin / heparan sulfate biosynthesis | 9653.1                                                                                                           |
| S2TASE1ly       | iduronate-2-sulfatase, lysosomal                                | [l]: h2o + hs_deg15 --> h + hs_deg16 + so4                         | 3.1.6.13 | Heparan sulfate degradation                | ( 3423.1 or 3423.2 )                                                                                             |
| S2TASE2ly       | iduronate-2-sulfatase, lysosomal                                | [l]: h2o + hs_deg21 --> h + hs_deg22 + so4                         | 3.1.6.13 | Heparan sulfate degradation                | ( 3423.1 or 3423.2 )                                                                                             |
| S2TASE3ly       | iduronate-2-sulfatase, lysosomal                                | [l]: cs_b_deg2 + h2o --> cs_b_deg3 + h + so4                       | 3.1.6.13 | Chondroitin sulfate degradation            | ( 3423.2 or 3423.1 )                                                                                             |
| S2TASE4ly       | glucuronate-2-sulfatase, lysosomal                              | [l]: cs_d_deg2 + h2o --> cs_d_deg3 + h + so4                       | 3.1.6.18 | Chondroitin sulfate degradation            |                                                                                                                  |
| S2TASE5ly       | glucuronate-2-sulfatase, lysosomal                              | [l]: cs_d_deg6 + h2o --> cs_c_deg5 + h + so4                       | 3.1.6.18 | Chondroitin sulfate degradation            |                                                                                                                  |
| S3T1g           | heparin-glucosamine 3-O-sulfotransferase                        | [g]: hs_pre13 + paps --> h + hs_pre14 + pap                        | 2.8.2.23 | Chondroitin / heparan sulfate biosynthesis | ( 9957.1 or 222537.1 or 9951.1 )                                                                                 |
| S3T2g           | heparin-glucosamine 3-O-sulfotransferase                        | [g]: hs_pre14 + paps --> h + hs_pre15 + pap                        | 2.8.2.23 | Chondroitin / heparan sulfate biosynthesis | ( 9956.1 or 222537.1 or 9951.1 )                                                                                 |
| S3T3g           | heparin-glucosamine 3-O-sulfotransferase                        | [g]: hs_pre15 + paps --> h + hspg + pap                            | 2.8.2.23 | Chondroitin / heparan sulfate biosynthesis | ( 9955.1 or 9954.1 or 9953.1 or 9952.1 or 64711.1 or 9951.1 )                                                    |

| Abbreviation | Reaction Name                                                       | Reaction                                                       | E.C. #   | Pathway                                    | Gene association                                    |
|--------------|---------------------------------------------------------------------|----------------------------------------------------------------|----------|--------------------------------------------|-----------------------------------------------------|
| S3TASE1y     | N-acetylglucosamine-3-sulfatase, lysosomal                          | [l] : h2o + hs_deg10 <=> h + hs_deg11 + so4                    | 3.1.6.15 | Heparan sulfate degradation                |                                                     |
| S3TASE2y     | N-acetylglucosamine-3-sulfatase, lysosomal                          | [l] : h2o + hs_deg17 <=> h + hs_deg18 + so4                    | 3.1.6.15 | Heparan sulfate degradation                |                                                     |
| S3TASE3y     | N-acetylglucosamine-3-sulfatase, lysosomal                          | [l] : h2o + hs_deg23 <=> h + hs_deg24 + so4                    | 3.1.6.15 | Heparan sulfate degradation                |                                                     |
| S4T1g        | chondroitin 4-sulfotransferase, Golgi apparatus                     | [g] : cs_pre + (2) paps --> cs_a,b,e_pre1 + (2) h + (2) pap    | 2.8.2.5  | Chondroitin / heparan sulfate biosynthesis | (166012.1 or 113189.1 or 50515.1 or 55501.1)        |
| S4T2g        | chondroitin 4-sulfotransferase, Golgi apparatus                     | [g] : cs_a,b_pre3 + paps --> cspg_a + h + pap                  | 2.8.2.5  | Chondroitin / heparan sulfate biosynthesis | (166012.1 or 113189.1 or 50515.1 or 55501.1)        |
| S4T3g        | chondroitin 4-sulfotransferase, Golgi apparatus                     | [g] : cs_e_pre4 + paps --> cs_e_pre5a + h + pap                | 2.8.2.5  | Chondroitin / heparan sulfate biosynthesis | (166012.1 or 113189.1 or 50515.1 or 55501.1)        |
| S4T4g        | chondroitin 4-sulfotransferase, Golgi apparatus                     | [g] : cs_c,d,e_pre1 + (2) paps --> cs_e_pre2 + (2) h + (2) pap | 2.8.2.5  | Chondroitin / heparan sulfate biosynthesis |                                                     |
| S4T5g        | chondroitin 4-sulfotransferase, Golgi apparatus                     | [g] : cs_e_pre5b + paps --> cspg_e + h + pap                   | 2.8.2.5  | Chondroitin / heparan sulfate biosynthesis |                                                     |
| S4T6g        | chondroitin 4-sulfotransferase, Golgi apparatus                     | [g] : cs_b_pre4 + paps --> cs_b_pre5 + h + pap                 | 2.8.2.5  | Chondroitin / heparan sulfate biosynthesis | (113189.1 or 55501.1 or 50515.1 or 166012.1)        |
| S4TASE1y     | N-acetylgalactosamine-4-sulfatase, lysosomal                        | [l] : cs_a + h2o <=> cs_a_deg1 + h + so4                       | 3.1.6.12 | Chondroitin sulfate degradation            | (411.1 or 411.2)                                    |
| S4TASE2y     | N-acetylgalactosamine-4-sulfatase, lysosomal                        | [l] : cs_a_deg3 + h2o <=> cs_a_deg4 + h + so4                  | 3.1.6.12 | Chondroitin sulfate degradation            | (411.2 or 411.1)                                    |
| S4TASE3y     | N-acetylgalactosamine-4-sulfatase, lysosomal                        | [l] : cs_b + h2o <=> cs_b_deg1 + h + so4                       | 3.1.6.12 | Chondroitin sulfate degradation            | (411.1 or 411.2)                                    |
| S4TASE4y     | N-acetylgalactosamine-4-sulfatase, lysosomal                        | [l] : cs_e + h2o <=> cs_e_deg1 + h + so4                       | 3.1.6.12 | Chondroitin sulfate degradation            | (411.1 or 411.2)                                    |
| S4TASE5y     | N-acetylgalactosamine-4-sulfatase, lysosomal                        | [l] : cs_e_deg4 + h2o <=> cs_e_deg5 + h + so4                  | 3.1.6.12 | Chondroitin sulfate degradation            | (411.1 or 411.2)                                    |
| S6T10g       | galactose/N-acetylglucosamine 6-O-sulfotransferase, Golgi apparatus | [g] : ksi_pre22 + paps --> h + ksi_pre23 + pap                 |          | Keratan sulfate biosynthesis               | (9435.1 or 10164.1 or 23563.1 or 23563.2 or 4166.1) |
| S6T11g       | galactose/N-acetylglucosamine 6-O-sulfotransferase, Golgi apparatus | [g] : ksi_pre25 + paps --> h + ksi_pre26 + pap                 |          | Keratan sulfate biosynthesis               | (9435.1 or 10164.1 or 23563.1 or 23563.2 or 4166.1) |
| S6T12g       | galactose/N-acetylglucosamine 6-O-sulfotransferase, Golgi apparatus | [g] : ksi_pre28 + paps --> h + ksi_pre29 + pap                 |          | Keratan sulfate biosynthesis               | (9435.1 or 4166.1 or 10164.1 or 23563.1 or 23563.2) |
| S6T13g       | galactose/N-acetylglucosamine 6-O-sulfotransferase, Golgi apparatus | [g] : ksi_pre31 + paps --> h + ksi_pre32 + pap                 |          | Keratan sulfate biosynthesis               | (10164.1 or 23563.1 or 23563.2 or 4166.1 or 9435.1) |
| S6T14g       | galactose/N-acetylglucosamine 6-O-sulfotransferase, Golgi apparatus | [g] : ksi_pre34 + paps --> h + ksi_pre35 + pap                 |          | Keratan sulfate biosynthesis               | (9435.1 or 10164.1 or 23563.1 or 23563.2 or 4166.1) |
| S6T15g       | galactose/N-acetylglucosamine 6-O-sulfotransferase, Golgi apparatus | [g] : ksi_pre36 + paps --> h + ksi + pap                       |          | Keratan sulfate biosynthesis               | (8534.1 or 9469.1)                                  |
| S6T16g       | galactose/N-acetylglucosamine 6-O-sulfotransferase, Golgi apparatus | [g] : ksii_core4_pre5 + paps --> h + ksii_core4_pre6 + pap     |          | Keratan sulfate biosynthesis               | (9435.1 or 10164.1 or 23563.1 or 23563.2 or 4166.1) |
| S6T17g       | galactose/N-acetylglucosamine 6-O-sulfotransferase, Golgi apparatus | [g] : ksii_core4_pre8 + paps --> h + ksii_core4_pre9 + pap     |          | Keratan sulfate biosynthesis               | (9435.1 or 10164.1 or 23563.1 or 23563.2 or 4166.1) |
| S6T18g       | galactose/N-acetylglucosamine 6-O-sulfotransferase, Golgi apparatus | [g] : ksii_core4_pre10 + paps --> h + ksii_core4 + pap         |          | Keratan sulfate biosynthesis               | (8534.1 or 9469.1)                                  |
| S6T19g       | chondroitin 6-sulfotransferase, Golgi apparatus                     | [g] : cs_pre + (2) paps --> cs_c,d,e_pre1 + (2) h + (2) pap    | 2.8.2.17 | Chondroitin / heparan sulfate biosynthesis | (9469.1 or 56548.1)                                 |
| S6T1g        | galactose/N-acetylglucosamine 6-O-sulfotransferase, Golgi apparatus | [g] : ksii_core2_pre5 + paps --> h + ksii_core2_pre6 + pap     |          | Keratan sulfate biosynthesis               | (9435.1 or 10164.1 or 23563.1 or 23563.2 or 4166.1) |
| S6T20g       | chondroitin 6-sulfotransferase, Golgi apparatus                     | [g] : cs_e_pre3 + paps --> cspg_c + h + pap                    | 2.8.2.17 | Chondroitin / heparan sulfate biosynthesis | (9469.1 or 56548.1)                                 |
| S6T21g       | chondroitin 6-sulfotransferase, Golgi apparatus                     | [g] : cs_d_pre4 + paps --> cs_d_pre5 + h + pap                 | 2.8.2.17 | Chondroitin / heparan sulfate biosynthesis | (9469.1 or 56548.1)                                 |
| S6T22g       | chondroitin 6-sulfotransferase, Golgi apparatus                     | [g] : cs_a,b,e_pre1 + (2) paps --> cs_e_pre2 + (2) h + (2) pap | 2.8.2.17 | Chondroitin / heparan sulfate biosynthesis | 56548.1                                             |
| S6T23g       | chondroitin 6-sulfotransferase, Golgi apparatus                     | [g] : cs_e_pre5a + paps --> cspg_e + h + pap                   | 2.8.2.17 | Chondroitin / heparan sulfate biosynthesis | 56548.1                                             |
| S6T24g       | chondroitin 6-sulfotransferase, Golgi apparatus                     | [g] : cs_e_pre4 + paps --> cs_e_pre5b + h + pap                | 2.8.2.17 | Chondroitin / heparan sulfate biosynthesis | (9469.1 or 56548.1)                                 |
| S6T25g       | heparan sulfate 6-sulfotransferase, Golgi apparatus                 | [g] : hs_pre12 + (3) paps --> (3) h + hs_pre13 + (3) pap       |          | Chondroitin / heparan sulfate biosynthesis | (9394.1 or 90161.1 or 90161.2 or 266722.1)          |
| S6T2g        | galactose/N-acetylglucosamine 6-O-sulfotransferase, Golgi apparatus | [g] : ksii_core2_pre8 + paps --> h + ksii_core2_pre9 + pap     |          | Keratan sulfate biosynthesis               | (9435.1 or 10164.1 or 23563.1 or 23563.2 or 4166.1) |
| S6T3g        | galactose/N-acetylglucosamine 6-O-sulfotransferase, Golgi apparatus | [g] : ksii_core2_pre10 + paps --> h + ksii_core2 + pap         |          | Keratan sulfate biosynthesis               | (8534.1 or 9469.1)                                  |
| S6T4g        | galactose/N-acetylglucosamine 6-O-sulfotransferase, Golgi apparatus | [g] : ksi_pre4 + paps --> h + ksi_pre5 + pap                   |          | Keratan sulfate biosynthesis               | (9435.1 or 10164.1 or 23563.1 or 23563.2 or 4166.1) |
| S6T5g        | galactose/N-acetylglucosamine 6-O-sulfotransferase, Golgi apparatus | [g] : ksi_pre7 + paps --> h + ksi_pre8 + pap                   |          | Keratan sulfate biosynthesis               | (9435.1 or 10164.1 or 23563.1 or 23563.2 or 4166.1) |
| S6T6g        | galactose/N-acetylglucosamine 6-O-sulfotransferase, Golgi apparatus | [g] : ksi_pre10 + paps --> h + ksi_pre11 + pap                 |          | Keratan sulfate biosynthesis               | (9435.1 or 10164.1 or 23563.1 or 23563.2 or 4166.1) |
| S6T7g        | galactose/N-acetylglucosamine 6-O-sulfotransferase, Golgi apparatus | [g] : ksi_pre13 + paps --> h + ksi_pre14 + pap                 |          | Keratan sulfate biosynthesis               | (9435.1 or 10164.1 or 23563.1 or 23563.2 or 4166.1) |
| S6T8g        | galactose/N-acetylglucosamine 6-O-sulfotransferase, Golgi apparatus | [g] : ksi_pre16 + paps --> h + ksi_pre17 + pap                 |          | Keratan sulfate biosynthesis               | (9435.1 or 10164.1 or 23563.1 or 23563.2 or 4166.1) |
| S6T9g        | galactose/N-acetylglucosamine 6-O-sulfotransferase, Golgi apparatus | [g] : ksi_pre19 + paps --> h + ksi_pre20 + pap                 |          | Keratan sulfate biosynthesis               | (9435.1 or 10164.1 or 23563.1 or 23563.2 or 4166.1) |
| S6TASE10y    | galactose-6-sulfate sulfatase, lysosomal                            | [l] : h2o + ksi_deg4 <=> h + ksi_deg5 + so4                    | 3.1.6.4  | Keratan sulfate degradation                | (2720.1 and 4758.1 and 2588.1 and 5476.1)           |
| S6TASE11y    | N-acetylglucosamine-6-sulfatase, lysosomal                          | [l] : h2o + ksi_deg6 <=> h + ksi_deg7 + so4                    | 3.1.6.14 | Keratan sulfate degradation                | 2799.1                                              |
| S6TASE12y    | N-acetylglucosamine-6-sulfatase, lysosomal                          | [l] : h2o + ksi_deg9 <=> h + ksi_deg10 + so4                   | 3.1.6.14 | Keratan sulfate degradation                | 2799.1                                              |
| S6TASE13y    | N-acetylglucosamine-6-sulfatase, lysosomal                          | [l] : h2o + ksi_deg12 <=> h + ksi_deg13 + so4                  | 3.1.6.14 | Keratan sulfate degradation                | 2799.1                                              |
| S6TASE14y    | N-acetylglucosamine-6-sulfatase, lysosomal                          | [l] : h2o + ksi_deg15 <=> h + ksi_deg16 + so4                  | 3.1.6.14 | Keratan sulfate degradation                | 2799.1                                              |

| Abbreviation | Reaction Name                                                                           | Reaction                                                     | E.C. #   | Pathway                                   | Gene association                                               |
|--------------|-----------------------------------------------------------------------------------------|--------------------------------------------------------------|----------|-------------------------------------------|----------------------------------------------------------------|
| S6TASE15ly   | N-acetylglucosamine-6-sulfatase, lysosomal                                              | [l] : h2o + ksi_deg18 <=> h + ksi_deg19 + so4                | 3.1.6.14 | Keratan sulfate degradation               | 2799.1                                                         |
| S6TASE16ly   | N-acetylglucosamine-6-sulfatase, lysosomal                                              | [l] : h2o + ksi_deg21 <=> h + ksi_deg22 + so4                | 3.1.6.14 | Keratan sulfate degradation               | 2799.1                                                         |
| S6TASE17ly   | N-acetylglucosamine-6-sulfatase, lysosomal                                              | [l] : h2o + ksi_deg24 <=> h + ksi_deg25 + so4                | 3.1.6.14 | Keratan sulfate degradation               | 2799.1                                                         |
| S6TASE18ly   | N-acetylglucosamine-6-sulfatase, lysosomal                                              | [l] : h2o + ksi_deg27 <=> h + ksi_deg28 + so4                | 3.1.6.14 | Keratan sulfate degradation               | 2799.1                                                         |
| S6TASE19ly   | N-acetylglucosamine-6-sulfatase, lysosomal                                              | [l] : h2o + ksi_deg30 <=> h + ksi_deg31 + so4                | 3.1.6.14 | Keratan sulfate degradation               | 2799.1                                                         |
| S6TASE1ly    | N-acetylglucosamine-6-sulfatase, lysosomal                                              | [l] : h2o + hs <=> h + hs_deg1 + so4                         | 3.1.6.14 | Heparan sulfate degradation               | 2799.1                                                         |
| S6TASE20ly   | N-acetylglucosamine-6-sulfatase, lysosomal                                              | [l] : h2o + ksi_deg33 <=> h + ksi_deg34 + so4                | 3.1.6.14 | Keratan sulfate degradation               | 2799.1                                                         |
| S6TASE21ly   | N-acetylglucosamine-6-sulfatase, lysosomal                                              | [l] : h2o + ksi_deg36 <=> h + ksi_deg37 + so4                | 3.1.6.14 | Keratan sulfate degradation               | 2799.1                                                         |
| S6TASE22ly   | galactose-6-sulfate sulfatase, lysosomal                                                | [l] : h2o + ksii_core2_deg1 <=> h + ksii_core2_deg2 + so4    | 3.1.6.4  | Keratan sulfate degradation               | ( 2720.1 and 2588.1 and 4758.1 and 5476.1 )                    |
| S6TASE23ly   | N-acetylglucosamine-6-sulfatase, lysosomal                                              | [l] : h2o + ksii_core2_deg3 <=> h + ksii_core2_deg4 + so4    | 3.1.6.14 | Keratan sulfate degradation               | 2799.1                                                         |
| S6TASE24ly   | N-acetylglucosamine-6-sulfatase, lysosomal                                              | [l] : h2o + ksii_core2_deg6 <=> h + ksii_core2_deg7 + so4    | 3.1.6.14 | Keratan sulfate degradation               | 2799.1                                                         |
| S6TASE25ly   | galactose-6-sulfate sulfatase, lysosomal                                                | [l] : h2o + ksii_core4_deg1 <=> h + ksii_core4_deg2 + so4    | 3.1.6.4  | Keratan sulfate degradation               | ( 2720.1 and 2588.1 and 4758.1 and 5476.1 )                    |
| S6TASE26ly   | N-acetylglucosamine-6-sulfatase, lysosomal                                              | [l] : h2o + ksii_core4_deg3 <=> h + ksii_core4_deg4 + so4    | 3.1.6.14 | Keratan sulfate degradation               | 2799.1                                                         |
| S6TASE2ly    | N-acetylglucosamine-6-sulfatase, lysosomal                                              | [l] : h2o + hs_deg5 <=> h + hs_deg6 + so4                    | 3.1.6.14 | Heparan sulfate degradation               | 2799.1                                                         |
| S6TASE3ly    | N-acetylglucosamine-6-sulfatase, lysosomal                                              | [l] : h2o + hs_deg11 <=> h + hs_deg12 + so4                  | 3.1.6.14 | Heparan sulfate degradation               | 2799.1                                                         |
| S6TASE4ly    | N-acetylgalactosamine-6-sulfatase, lysosomal                                            | [l] : cs_c + h2o <=> cs_c_deg1 + h + so4                     | 3.1.6.4  | Chondroitin sulfate degradation           | ( 2720.1 and 2588.1 and 4758.1 and 5476.1 )                    |
| S6TASE5ly    | N-acetylgalactosamine-6-sulfatase, lysosomal                                            | [l] : cs_c_deg3 + h2o <=> cs_c_deg4 + h + so4                | 3.1.6.4  | Chondroitin sulfate degradation           | ( 4758.1 and 2588.1 and 2720.1 and 5476.1 )                    |
| S6TASE6ly    | N-acetylgalactosamine-6-sulfatase, lysosomal                                            | [l] : cs_d + h2o <=> cs_d_deg1 + h + so4                     | 3.1.6.4  | Chondroitin sulfate degradation           | ( 2588.1 and 4758.1 and 5476.1 and 2720.1 )                    |
| S6TASE7ly    | N-acetylgalactosamine-6-sulfatase, lysosomal                                            | [l] : cs_d_deg4 + h2o <=> cs_d_deg5 + h + so4                | 3.1.6.4  | Chondroitin sulfate degradation           | ( 4758.1 and 2720.1 and 2588.1 and 5476.1 )                    |
| S6TASE8ly    | N-acetylgalactosamine-6-sulfatase, lysosomal                                            | [l] : cs_e_deg1 + h2o <=> cs_e_deg2 + h + so4                | 3.1.6.4  | Chondroitin sulfate degradation           | ( 2720.1 and 4758.1 and 2588.1 and 5476.1 )                    |
| S6TASE9ly    | N-acetylgalactosamine-6-sulfatase, lysosomal                                            | [l] : cs_e_deg5 + h2o <=> cs_e_deg6 + h + so4                | 3.1.6.4  | Chondroitin sulfate degradation           | ( 5476.1 and 2588.1 and 4758.1 and 2720.1 )                    |
| SACCD3m      | saccharopine dehydrogenase (NADP, L-lysine forming), mitochondrial                      | [m] : alk + h + lys-L + nadph -> h2o + nadp + saccp-L        | 1.5.1.8  | Lysine Metabolism                         | 10157.1                                                        |
| SACCD4m      | saccharopine dehydrogenase (NAD, L-glutamate forming), mitochondrial                    | [m] : h2o + nadp + saccp-L -> L2aadp6sa + glu-L + h + nadph  | 1.5.1.10 | Lysine Metabolism                         | 10157.1                                                        |
| SADT         | sulfate adenylyltransferase                                                             | [c] : atp + h + so4 -> aps + ppi                             | 2.7.7.4  | Nucleotides                               | ( 9060.1 or 9061.1 )                                           |
| SALMCOM      | S-Adenosyl-L-methionine:catechol O-methyltransferase                                    | [c] : amet + nrpphr -> ahcys + h + normete-L                 | 2.1.1.6  | Tyrosine metabolism                       | ( 1312.1 or 1312.2 or 118881.1 )                               |
| SALMCOM2     | S-Adenosyl-L-methionine:catechol O-methyltransferase                                    | [c] : adm1 + amet -> ahcys + h + mepi                        | 2.1.1.6  | Tyrosine metabolism                       | 118881.1                                                       |
| SAMHISTA     | S-Adenosyl-L-methionine:histamine N-tele-methyltransferase                              | [c] : amet + hista -> ahcys + h + mhista                     | 2.1.1.8  | Histidine Metabolism                      | 3176.1                                                         |
| SARCOXp      | sarcosine oxidase, peroxisomal                                                          | [x] : h2o + o2 + sarcs -> fald + gly + h2o2                  | 1.5.3.1  | Glycine, Serine, and Threonine Metabolism | 51268.1                                                        |
| SARCSstex    | Sarcosine transport (extracellular to cytosol)                                          | sarsc[e] -> sarsc[s]                                         |          | Transport, Extracellular                  |                                                                |
| SARCSm       | Sarcosine transport (mitochondrial)                                                     | sarsc[e] -> sarsc[m]                                         |          | Transport, Mitochondrial                  |                                                                |
| SARCStp      | Sarcosine transport (peroxisomal)                                                       | sarsc[e] -> sarsc[s]                                         |          | Transport, Peroxisomal                    |                                                                |
| SARDHm       | Sarcosine dehydrogenase (m)                                                             | [m] : fad + sarcs + thf -> fadh2 + gly + mlthf               | 1.5.99.1 | Urea cycle/amino group metabolism         | 1757.1                                                         |
| SBPP1er      | sphingoid base-phosphate phosphatase (sphinganine 1-phosphatase), endoplasmic reticulum | [r] : h2o + sph1p -> pi + sphgn                              |          | Sphingolipid Metabolism                   | 81537.1                                                        |
| SBPP3er      | sphingoid base-phosphate phosphatase (sphinganine 3-phosphatase), endoplasmic reticulum | [r] : h2o + sph3p -> pi + sphngs                             |          | Sphingolipid Metabolism                   | 81537.1                                                        |
| SBTD_D2      | D-sorbitol dehydrogenase (D-fructose producing)                                         | [c] : nad + sbt-D -> fru + h + nadh                          | 1.1.1.14 | Fructose and Mannose Metabolism           | 6652.1                                                         |
| SBTR         | D-sorbitol reductase                                                                    | [c] : glc-D + h + nadph -> nadp + sbt-D                      | 1.1.1.21 | Fructose and Mannose Metabolism           | ( 231.1 or 10327.1 or 10327.2 or 8574.1 )                      |
| SCP21x       | Sterol carrier protein 2                                                                | phytco[a] <=> phytco[s]                                      |          | Transport, Peroxisomal                    | 6342.1                                                         |
| SCP22x       | Sterol carrier protein 2                                                                | dmnonco[a] <=> dmnonco[s]                                    |          | Transport, Peroxisomal                    | 6342.1                                                         |
| SCP2x        | peroxisomal thiolase 2                                                                  | [x] : coa + dhcholoylcoa -> dgchocola + ppcoa                |          | Bile Acid Biosynthesis                    | 6342.1                                                         |
| SCP3x        | peroxisomal thiolase 2                                                                  | [x] : coa + dhcholestancoa + o2 -> dchocola + h2o + ppcoa    |          | Bile Acid Biosynthesis                    | 6342.1                                                         |
| SCPx         | peroxisomal thiolase 2                                                                  | [x] : cholcoaone + coa -> cholcoa + ppcoa                    |          | Bile Acid Biosynthesis                    | 6342.1                                                         |
| SEAHCSYHYD   | Se-Adenosylselenomocysteine hydrolase                                                   | [c] : h2o + seahcys -> adn + selhcys                         | 3.3.1.1  | Selenoamino acid metabolism               | ( 191.1 or 10768.2 or 10768.1 or 23382.1 )                     |
| SEAHCSstn    | Se-adenosyl-seleno-L-homocysteine nuclear transport                                     | seahcys[c] <=> seahcys[n]                                    |          | Selenoamino acid metabolism               |                                                                |
| SEASMETn     | Se-adenosyl-seleno-L-methionine nuclear transport                                       | seasmet[c] <=> seasmet[n]                                    |          | Selenoamino acid metabolism               |                                                                |
| SELADT       | selenate adenylyltransferase                                                            | [c] : atp + h + sel -> adsel + ppi                           | 2.7.7.4  | Selenoamino acid metabolism               | ( 9061.1 or 9060.1 )                                           |
| SELCSLY      | selenocysteine lyase                                                                    | [c] : dtt + selcys -> ala-L + dtOH + h + seln                | 4.4.1.16 | Selenoamino acid metabolism               | 51540.1                                                        |
| SELCSLY2     | selenocysteine lyase                                                                    | [c] : pdx5p + selcys -> ala-L + h + pydx5p + seln            |          | Selenoamino acid metabolism               | 51540.1                                                        |
| SELCSYSTGL   | selenocystathionine g-lyase                                                             | [c] : h2o + selcyst -> 2obut + nh4 + selcys                  | 4.4.1.1  | Selenoamino acid metabolism               | ( 1491.1 or 1491.2 )                                           |
| SELCSYSTS    | selenocystathionine beta-synthase                                                       | [c] : selhcys + ser-L -> h2o + selcyst                       | 4.2.1.22 | Selenoamino acid metabolism               | 875.1                                                          |
| SELMETAT     | selenomethionine adenylyltransferase                                                    | [c] : atp + h2o + selmeth -> pi + ppi + seasmet              | 2.5.1.6  | Selenoamino acid metabolism               | ( 4143.1 or ( 27430.1 and 4144.1 ) or ( 27430.2 and 4144.1 ) ) |
| SELNPS       | Selenophosphate synthase                                                                | [c] : atp + h2o + seln -> amp + pi + selnp                   | 2.7.9.3  | Selenoamino acid metabolism               | ( 22929.1 or 22928.1 )                                         |
| SELt4_3      | selenate transport via sodium symport                                                   | (3) na1[e] + sel[e] <=> (3) na1[c] + sel[c]                  |          | Transport, Extracellular                  | 6561.1                                                         |
| SERALANaEx   | L-alanine/L-serine Na-dependent exchange (Ser-L in)                                     | ala-L[e] + na1[e] + ser-L[e] -> ala-L[e] + na1[c] + ser-L[c] |          | Transport, Extracellular                  | ( 6509.1 or 6510.1 )                                           |
| SERASNaEx    | L-serine/L-asparagine Na-dependent exchange (Ser-L in)                                  | asn-L[e] + na1[e] + ser-L[e] -> asn-L[e] + na1[c] + ser-L[c] |          | Transport, Extracellular                  | 6510.1                                                         |
| SERCYSNaEx   | L-serine/L-cysteine Na-dependent exchange (Ser-L in)                                    | cys-L[e] + na1[e] + ser-L[e] -> cys-L[e] + na1[c] + ser-L[c] |          | Transport, Extracellular                  | ( 6509.1 or 6510.1 )                                           |
| SERDGLNexR   | D-Serine/Glutamine reversible exchange                                                  | gln-L[e] + ser-D[e] <=> gln-L[e] + ser-D[c]                  |          | Transport, Extracellular                  | ( 6520.1 and 56301.1 )                                         |

| Abbreviation | Reaction Name                                                                     | Reaction                                                      | E.C. #    | Pathway                                   | Gene association                                                                                                                          |
|--------------|-----------------------------------------------------------------------------------|---------------------------------------------------------------|-----------|-------------------------------------------|-------------------------------------------------------------------------------------------------------------------------------------------|
| SERDGLYexR   | D-Serine/Glycine reversible exchange                                              | gly[c] + ser-D[e] <=> gly[e] + ser-D[c]                       |           | Transport, Extracellular                  | ( 6520.1 and 5630.1 )                                                                                                                     |
| SERGLNexR    | L-Serine/ Glutamine reversible exchange                                           | gln-L[e] + ser-L[e] <=> gln-L[e] + ser-L[c]                   |           | Transport, Extracellular                  | ( 6520.1 and 5630.1 )                                                                                                                     |
| SERGLNNaEx   | L-serine/L- glutamine Na-dependent exchange (Ser-L in)                            | gln-L[e] + na1[e] + ser-L[e] --> gln-L[e] + na1[c] + ser-L[c] |           | Transport, Extracellular                  | 6510.1                                                                                                                                    |
| SERGLYexR    | L-Serine/Glycine reversible exchange                                              | gly[c] + ser-L[e] <=> gly[e] + ser-L[c]                       |           | Transport, Extracellular                  | ( 6520.1 and 5630.1 )                                                                                                                     |
| SERHL        | L-Serine hydro-lyase                                                              | [c] : ser-L --> 2amac + h2o                                   |           | Glycine, Serine, and Threonine Metabolism | 10993.1                                                                                                                                   |
| SERLYSNaex   | Serine/Lysine Na-dependent exchange (Ser in)                                      | lys-L[c] + na1[e] + ser-L[e] --> lys-L[e] + na1[c] + ser-L[c] |           | Transport, Extracellular                  | ( 9056.1 and 6519.1 )                                                                                                                     |
| SERPT        | serine C-palmitoyltransferase                                                     | [c] : h + pmcoa + ser-L --> 3dsphgn + co2 + coa               | 2.3.1.50  | Sphingolipid Metabolism                   | ( 9517.1 and 10558.1 )                                                                                                                    |
| SERt4        | L-serine via sodium symport                                                       | na1[e] + ser-L[e] --> na1[c] + ser-L[c]                       |           | Transport, Extracellular                  | ( 11254.1 or 55089.1 or 54407.1 or 81539.1 )                                                                                              |
| SERTHRNaEx   | L-serine/L-threonine Na-dependent exchange (Ser-L in)                             | na1[e] + ser-L[e] + thr-L[c] --> na1[c] + ser-L[c] + thr-L[e] |           | Transport, Extracellular                  | ( 6509.1 or 6510.1 )                                                                                                                      |
| SERtN1       | Serine transport (Na, H coupled)                                                  | h[c] + (2) na1[e] + ser-L[c] <=> h[e] + (2) na1[c] + ser-L[c] |           | Transport, Extracellular                  | 92745.1                                                                                                                                   |
| SERtp        | L-serine transport, peroxisomal                                                   | ser-L[c] <=> ser-L[x]                                         |           | Transport, Peroxisomal                    |                                                                                                                                           |
| SFGTH        | S-Formylglutathione hydrolase                                                     | [c] : Sfgluth + h2o <=> for + gthrd + h                       | 3.1.2.12  | Tyrosine metabolism                       | 2098.1                                                                                                                                    |
| SGALSIDeg    | sgalside_hs intracellular transport                                               | sgalside_hs[c] <=> sgalside_hs[g]                             |           | Transport, Golgi Apparatus                |                                                                                                                                           |
| SGALSIDel    | sgalside_hs intracellular transport                                               | sgalside_hs[c] <=> sgalside_hs[l]                             |           | Transport, Lysosomal                      |                                                                                                                                           |
| SGPL11r      | Sphingosine-1-phosphate lyase 1                                                   | [r] : sph1p --> ethamp + hxdca                                | 4.1.2.27  | Sphingolipid Metabolism                   | 8879.1                                                                                                                                    |
| SGPL12r      | Sphingosine-1-phosphate lyase                                                     | [r] : h2o + sphs1p --> ethamp + h + hdca                      | 4.1.2.27  | Sphingolipid Metabolism                   | 8879.1                                                                                                                                    |
| SIAASE       | sialidase                                                                         | [c] : (2) h2o + s2l2n2m2m --> (2) acnam + l2n2m2m             | 3.2.1.18  | N-Glycan Degradation                      | ( 4759.1 or 129807.1 )                                                                                                                    |
| SIAASE2ly    | sialidase, lysosomal                                                              | [l] : h2o + ksi_deg3 --> acnam + ksi_deg4                     | 3.2.1.18  | Keratan sulfate degradation               | ( 2720.1 and 2588.1 and 4758.1 and 5476.1 )                                                                                               |
| SIAASE3ly    | sialidase, lysosomal                                                              | [l] : h2o + ksii_core2 --> acnam + ksii_core2_deg1            | 3.2.1.18  | Keratan sulfate degradation               | ( 2720.1 and 2588.1 and 5476.1 and 4758.1 )                                                                                               |
| SIAASE4ly    | sialidase, lysosomal                                                              | [l] : h2o + ksii_core4 --> acnam + ksii_core4_deg1            | 3.2.1.18  | Keratan sulfate degradation               | ( 2720.1 and 2588.1 and 4758.1 and 5476.1 )                                                                                               |
| SIAASEly     | sialidase, lysosomal                                                              | [l] : (2) h2o + s2l2n2m2m --> (2) acnam + l2n2m2m             | 3.2.1.18  | N-Glycan Degradation                      | ( 2588.1 and 2720.1 and 5476.1 and 4758.1 )                                                                                               |
| SIAT4Bg      | Beta-galactoside alpha-2,3-sialyltransferase, Golgi apparatus                     | [g] : cmpacna + galgbside_hs --> acngalgbside_hs + cmp + h    |           | Sphingolipid Metabolism                   | 6483.1                                                                                                                                    |
| SIAT9g       | Lactosylceramide alpha-2,3-sialyltransferase, Golgi apparatus                     | [g] : cmpacna + galgluside_hs --> cmp + gm3_hs + h            | 2.4.99.9  | Sphingolipid Metabolism                   | 8869.1                                                                                                                                    |
| SLCBK1       | sphingolipid long chain base kinase (sphinganine)                                 | [c] : atp + sphgn --> adp + h + sph1p                         |           | Sphingolipid Metabolism                   | 56848.1                                                                                                                                   |
| SLDr         | L-sulfolactate transport (cytosol to extracellular)                               | sl-L[c] --> sl-L[e]                                           |           | Cysteine Metabolism                       |                                                                                                                                           |
| SLDs         | L-sulfolactate dehydrogenase (NAD+)                                               | [c] : nad + sl-L <=> 3sppy + h + nadh                         | 1.1.1.272 | Cysteine Metabolism                       | ( 4190.1 or 130752.1 )                                                                                                                    |
| SLDxm        | L-sulfolactate dehydrogenase (NAD+), mitochondrial                                | [m] : nad + sl-L <=> 3sppy + h + nadh                         | 1.1.1.272 | Cysteine Metabolism                       | 4191.1                                                                                                                                    |
| SMPD3g       | sphingomyelin phosphodiesterase 3, neutral membrane (neutral sphingomyelinase II) | [g] : h2o + sphmyln_hs --> cholp + crm_hs + h                 |           | Sphingolipid Metabolism                   | ( 55512.1 or 55512.2 )                                                                                                                    |
| SMPD3l       | sphingomyelin phosphodiesterase 3, neutral membrane (neutral sphingomyelinase II) | [l] : h2o + sphmyln_hs --> cholp + crm_hs + h                 |           | Sphingolipid Metabolism                   | ( 55512.1 or 55512.2 )                                                                                                                    |
| SMPD4        | sphingomyelinase                                                                  | [c] : h2o + spe_hs --> cholp + h + sphings                    |           | Sphingolipid Metabolism                   |                                                                                                                                           |
| SMS          | Sphingomyelin synthase (homo sapiens)                                             | [c] : crm_hs + pchol_hs --> dag_hs + sphmyln_hs               |           | Sphingolipid Metabolism                   | 259230.1                                                                                                                                  |
| SO4CLex2     | sulfate transport via chloride countertransport (2:1)                             | cl[c] + (2) so4[e] --> cl[e] + (2) so4[c]                     |           | Transport, Extracellular                  | ( 65010.1 or 65010.2 or 65010.3 )                                                                                                         |
| SO4HC0tex    | sulfate transport via bicarbonate countertransport                                | (2) hco3[c] + so4[e] --> (2) hco3[e] + so4[c]                 |           | Transport, Extracellular                  | ( 10861.1 or 10861.2 or 1836.1 or 10861.3 or 1811.1 or 115111.1 or 115111.2 or 116369.1 or 116369.2 or 115019.1 or 115019.2 or 284129.1 ) |
| SO4OXAtex2   | sulfate transport via oxalate countertransport (2:1)                              | oxa[c] + (2) so4[e] --> oxa[e] + (2) so4[c]                   |           | Transport, Extracellular                  | ( 65010.1 or 65010.2 or 65010.3 )                                                                                                         |
| SO44_2       | sulfate transport via sodium symport                                              | (2) na1[e] + so4[e] <=> (2) na1[c] + so4[c]                   |           | Transport, Extracellular                  | 26266.1                                                                                                                                   |
| SO44_3       | sulfate transport via sodium symport                                              | (3) na1[e] + so4[e] <=> (3) na1[c] + so4[c]                   |           | Transport, Extracellular                  | 6561.1                                                                                                                                    |
| SOAT11       | sterol O-acyltransferase (acyl-Coenzyme A: cholesterol acyltransferase) 1         | [c] : R1coa_hs + chsterol --> coa + xolest_hs                 |           | Cholesterol Metabolism                    | 6646.1                                                                                                                                    |
| SOAT11r      | sterol O-acyltransferase (acyl-Coenzyme A: cholesterol acyltransferase) 1         | [r] : R1coa_hs + chsterol --> coa + xolest_hs                 |           | Cholesterol Metabolism                    | 6646.1                                                                                                                                    |
| SOAT12       | sterol O-acyltransferase (acyl-Coenzyme A: cholesterol acyltransferase) 1         | [c] : R2coa_hs + chsterol --> coa + xolest_hs                 |           | Cholesterol Metabolism                    | 6646.1                                                                                                                                    |
| SOAT12r      | sterol O-acyltransferase (acyl-Coenzyme A: cholesterol acyltransferase) 1         | [r] : R2coa_hs + chsterol --> coa + xolest_hs                 |           | Cholesterol Metabolism                    | 6646.1                                                                                                                                    |
| SPC_Hst      | sphingosylphosphorylcholine transport (diffusion)                                 | spe_hs[c] <=> spe_hs[e]                                       |           | Transport, Extracellular                  |                                                                                                                                           |
| SPH1Pe       | sph1p transport                                                                   | sph1p[c] <=> sph1p[e]                                         |           | Transport, Extracellular                  |                                                                                                                                           |
| SPH1Pr       | sph1p intracellular transport                                                     | sph1p[c] <=> sph1p[r]                                         |           | Transport, Endoplasmic Reticular          |                                                                                                                                           |
| SPHGtr       | sphinganine intracellular transport                                               | sphgn[r] <=> sphgn[c]                                         |           | Transport, Endoplasmic Reticular          |                                                                                                                                           |
| SPHINGStl    | sphingosine intracellular transport                                               | sphings[c] <=> sphings[l]                                     |           | Transport, Lysosomal                      |                                                                                                                                           |
| SPHINGStr    | sphingosine intracellular transport                                               | sphings[c] <=> sphings[r]                                     |           | Transport, Endoplasmic Reticular          |                                                                                                                                           |
| SPHK21c      | sphingosine kinase 2                                                              | [c] : atp + sphings --> adp + h + sphs1p                      |           | Sphingolipid Metabolism                   | 56848.1                                                                                                                                   |
| SPHMDAc      | sphingomyelin deacylase                                                           | [c] : h2o + sphmyln_hs --> Rrotal + spe_hs                    |           | Sphingolipid Metabolism                   |                                                                                                                                           |
| SPHMYLNg     | sphingomyelin intracellular transport                                             | sphmyln_hs[c] <=> sphmyln_hs[g]                               |           | Transport, Golgi Apparatus                |                                                                                                                                           |
| SPHMYLNl     | sphingomyelin intracellular transport                                             | sphmyln_hs[c] <=> sphmyln_hs[l]                               |           | Transport, Lysosomal                      |                                                                                                                                           |
| SPHS1Pe      | sphingosine-1-phosphate transport                                                 | sphs1p[c] <=> sphs1p[e]                                       |           | Transport, Extracellular                  |                                                                                                                                           |
| SPHS1Pr      | sphingosine-1-phosphate transport                                                 | sphs1p[c] <=> sphs1p[r]                                       |           | Transport, Endoplasmic Reticular          |                                                                                                                                           |
| SPMDOX       | Spermidine(acceptor) oxidoreductase                                               | [c] : h2o + o2 + spmd --> 13dumpp + 4abutn + h2o2             | 1.5.99.6  | beta-Alanine metabolism                   |                                                                                                                                           |
| SPMS         | spermidine synthase                                                               | [c] : ameta + ptrc --> 5mta + h + spmd                        | 2.5.1.16  | Urea cycle/amino group metabolism         | 6723.1                                                                                                                                    |
| SPODM        | superoxide dismutase                                                              | [c] : (2) h + (2) o2s --> h2o2 + o2                           | 1.15.1.1  | ROS Detoxification                        | 6647.1                                                                                                                                    |
| SPODMe       | superoxide dismutase, extracellular                                               | [e] : (2) h + (2) o2s --> h2o2 + o2                           | 1.15.1.1  | ROS Detoxification                        | 6649.1                                                                                                                                    |

| Abbreviation | Reaction Name                                                                                                               | Reaction                                                                                | E.C. #     | Pathway                                   | Gene association                                                                                               |
|--------------|-----------------------------------------------------------------------------------------------------------------------------|-----------------------------------------------------------------------------------------|------------|-------------------------------------------|----------------------------------------------------------------------------------------------------------------|
| SPODMm       | superoxide dismutase                                                                                                        | [m] : (2) h + (2) o2s -> h2o2 + o2                                                      | 1.15.1.1   | ROS Detoxification                        | 6648.1                                                                                                         |
| SPODMn       | superoxide dismutase, nuclear                                                                                               | [n] : (2) h + (2) o2s -> h2o2 + o2                                                      | 1.15.1.1   | ROS Detoxification                        | 6647.1                                                                                                         |
| SPODMx       | superoxide dismutase, peroxisome                                                                                            | [x] : (2) h + (2) o2s -> h2o2 + o2                                                      | 1.15.1.1   | ROS Detoxification                        | 6647.1                                                                                                         |
| SPR          | sepiapterin reductase                                                                                                       | [c] : 6pntp + (2) h + (2) nadph -> (2) nadp + thbpt                                     | 1.1.1.153  | Tetrahydrobiopterin                       | 6697.1                                                                                                         |
| SPRMS        | spermine synthase                                                                                                           | [c] : ametam + spmd -> 5mta + h + sprm                                                  | 2.5.1.22   | Urea cycle/amino group metabolism         | 6611.1                                                                                                         |
| SPRn         | sepiapterin reductase, nuclear                                                                                              | [n] : 6pntp + (2) h + (2) nadph -> (2) nadp + thbpt                                     | 1.1.1.153  | Tetrahydrobiopterin                       | 6697.1                                                                                                         |
| SPTix        | serine-pyruvate aminotransferase (irreversible), peroxisomal                                                                | [x] : pyr + ser-L -> ala-L + hpyr                                                       |            | Glycine, Serine, and Threonine Metabolism | 189.1                                                                                                          |
| SOLEr        | Squalene epoxidase, endoplasmic reticular (NADP)                                                                            | [r] : h + nadph + o2 + sq -> Sq23epx + h2o + nadp                                       | 1.14.99.7  | Cholesterol Metabolism                    | 6713.1                                                                                                         |
| SQLSr        | Squalene synthase                                                                                                           | [r] : (2) frdp + h + nadph -> nadp + (2) ppi + sql                                      | 2.5.1.21   | Cholesterol Metabolism                    | 2222.1                                                                                                         |
| SR5AR2r      | 3-oxo-5-alpha-steroid 4-dehydrogenase                                                                                       | [r] : andrstdn + h + nadph -> andrstdn + nadp                                           | 1.3.99.5   | Steroid Metabolism                        | (6715.1 or 6716.1)                                                                                             |
| SR5ARr       | 3-oxo-5-alpha-steroid 4-dehydrogenase                                                                                       | [r] : h + nadph + tsterone -> 5adtsterone + nadp                                        | 1.3.99.5   | Steroid Metabolism                        | (6716.1 or 6715.1)                                                                                             |
| SRTN23OX     | 5-Hydroxytryptamine:oxygen 2,3-dioxygenase (indole decyclizing)                                                             | [c] : o2 + srtm -> f5hoxykn                                                             | 1.13.11.42 | Tryptophan metabolism                     | 3620.1                                                                                                         |
| SRTNACT      | Acetyl-CoA:aralkylamine N-acetyltransferase                                                                                 | [c] : accoa + srtm -> Nacsrtm + coa + h                                                 | 2.3.1.87   | Tryptophan metabolism                     | 15.1                                                                                                           |
| SRTNMTX      | S-Adenosyl-L-methionine:amine N-methyltransferase (srtm)                                                                    | [c] : amet + srtm -> aheys + h + nmthsrtm                                               | 2.1.1.49   | Tryptophan metabolism                     | 11185.1                                                                                                        |
| SRTNt6(2)r   | Serotonin reversible transport in via sodium symport/potassium antiport (1:2)                                               | (2) k[c] + (2) na1[e] + srtm[e] <=> (2) k[e] + (2) na1[e] + srtm[c]                     |            | Transport, Extracellular                  | 6532.1                                                                                                         |
| SRTNtu       | Serotonin uniport                                                                                                           | srtm[e] <=> srtm[c]                                                                     |            | Transport, Extracellular                  | (6580.1 or 6582.1 or 6582.2)                                                                                   |
| SSALxm       | succinate-semialdehyde dehydrogenase (NAD) reversible (mitochondrial)                                                       | [m] : h2o + nad + suesal -> (2) h + nadh + succ                                         | 1.2.1.16   | Glutamate metabolism                      | (7915.1 or 7915.2)                                                                                             |
| ST3GAL21g    | CMP-N-acetylneuraminate-beta-galactosamide-alpha-2,3-sialyltransferase, Golgi apparatus                                     | [g] : cmpacna + ga1_hs -> cmp + gm1b_hs + h                                             |            | Sphingolipid Metabolism                   | 6483.1                                                                                                         |
| ST3GAL22g    | CMP-N-acetylneuraminate-beta-galactosamide-alpha-2,3-sialyltransferase, Golgi apparatus                                     | [g] : cmpacna + gm1_hs -> cmp + gd1a_hs + h                                             |            | Sphingolipid Metabolism                   | 6483.1                                                                                                         |
| ST3GAL23g    | CMP-N-acetylneuraminate-beta-galactosamide-alpha-2,3-sialyltransferase, Golgi apparatus                                     | [g] : cmpacna + gd1b_hs -> cmp + gt1b_hs + h                                            |            | Sphingolipid Metabolism                   | 6483.1                                                                                                         |
| ST3GAL31g    | ST3 beta-galactoside alpha-2,3-sialyltransferase 3                                                                          | [g] : cmpacna + galaclegalgulsid_hs -> acngalaclegalgulsid_hs + cmp + h                 | 2.4.99.6   | Blood Group Biosynthesis                  | (6487.4 or 6487.1 or 6487.5 or 6487.3 or 6487.2 or 6487.6 or 6487.7 or 6487.8 or 6487.9 or 6487.10 or 6487.11) |
| ST3GAL61g    | Type 2 lactosamine alpha-2,3-sialyltransferase                                                                              | [g] : cmpacna + gal14clegalgulsid_hs -> acngal14clegalgulsid_hs + cmp + h               |            | Blood Group Biosynthesis                  | 10402.1                                                                                                        |
| ST3GAL62g    | Type 2 lactosamine alpha-2,3-sialyltransferase                                                                              | [g] : cmpacna + galaclegal14clegalgulsid_hs -> acngalaclegal14clegalgulsid_hs + cmp + h |            | Blood Group Biosynthesis                  | 10402.1                                                                                                        |
| ST6GALNAC21  | Alpha-N-acetylgalactosaminide alpha-2,6-sialyltransferase 2                                                                 | [g] : acngalgsid_hs + cmpacna -> acn13acngalgsid_hs + cmp + h                           |            | Sphingolipid Metabolism                   | 10610.1                                                                                                        |
| ST6GALNAC22  | Alpha-N-acetylgalactosaminide alpha-2,6-sialyltransferase 2                                                                 | [g] : acngalgsid_hs + cmpacna -> acn23acngalgsid_hs + cmp + h                           |            | Sphingolipid Metabolism                   | 10610.1                                                                                                        |
| ST6GALNAC23  | Alpha-N-acetylgalactosaminide alpha-2,6-sialyltransferase 2                                                                 | [g] : cmpacna + ga2_hs -> cmp + gm2a_hs + h                                             |            | Sphingolipid Metabolism                   | 10610.1                                                                                                        |
| ST6GALNAC24  | Alpha-N-acetylgalactosaminide alpha-2,6-sialyltransferase 2                                                                 | [g] : cmpacna + gm1a_hs -> cmp + gd1b2_hs + h                                           |            | Sphingolipid Metabolism                   | 10610.1                                                                                                        |
| ST6GALNAC25  | Alpha-N-acetylgalactosaminide alpha-2,6-sialyltransferase 2                                                                 | [g] : cmpacna + gd1alpha_hs -> cmp + gt1alpha_hs + h                                    |            | Sphingolipid Metabolism                   | 10610.1                                                                                                        |
| ST6GALNAC26  | Alpha-N-acetylgalactosaminide alpha-2,6-sialyltransferase 2                                                                 | [g] : cmpacna + gt1alpha_hs -> cmp + gq1balpha_hs + h                                   |            | Sphingolipid Metabolism                   | 10610.1                                                                                                        |
| ST6GALNAC27  | Alpha-N-acetylgalactosaminide alpha-2,6-sialyltransferase 2                                                                 | [g] : cmpacna + gt1c_hs -> cmp + gq1c_hs + h                                            |            | Sphingolipid Metabolism                   | 10610.1                                                                                                        |
| ST6GALNAC28  | Alpha-N-acetylgalactosaminide alpha-2,6-sialyltransferase 2                                                                 | [g] : cmpacna + gq1c_hs -> cmp + gp1c_hs + h                                            |            | Sphingolipid Metabolism                   | 10610.1                                                                                                        |
| ST6GALNAC31  | Alpha-N-acetylgalactosaminide alpha-2,6-sialyltransferase 3                                                                 | [g] : cmpacna + gm1b_hs -> cmp + gd1alpha_hs + h                                        |            | Sphingolipid Metabolism                   | (256435.1 or 81849.1 or 30815.1)                                                                               |
| ST6GALNAC61  | sialyltransferase 7 (alpha-N-acetylneuraminy 2,3-betagalactosyl-1,3)-N-acetyl galactosaminide alpha-2,6-sialyltransferase F | [g] : cmpacna + gd1a_hs -> cmp + gt1alpha_hs + h                                        |            | Sphingolipid Metabolism                   | 30815.1                                                                                                        |
| ST6GALNAC62  | sialyltransferase 7 (alpha-N-acetylneuraminy 2,3-betagalactosyl-1,3)-N-acetyl galactosaminide alpha-2,6-sialyltransferase F | [g] : cmpacna + gt1b_hs -> cmp + gq1balpha_hs + h                                       |            | Sphingolipid Metabolism                   | 30815.1                                                                                                        |
| ST8SIA11     | Beta-galactoside alpha-2,3-sialyltransferase                                                                                | [g] : acngalgsid_hs + cmpacna -> acn23acngalgsid_hs + cmp + h                           | 2.4.99.8   | Sphingolipid Metabolism                   | 6489.1                                                                                                         |
| ST8SIA12     | Beta-galactoside alpha-2,3-sialyltransferase                                                                                | [g] : cmpacna + gm3_hs -> cmp + gd3_hs + h                                              | 2.4.99.8   | Sphingolipid Metabolism                   | 6489.1                                                                                                         |
| ST8SIA51g    | Beta-galactoside alpha-2,3-sialyltransferase                                                                                | [g] : cmpacna + gd3_hs -> cmp + gt3_hs + h                                              | 2.4.99.8   | Sphingolipid Metabolism                   | 29906.1                                                                                                        |
| ST8SIA52g    | Beta-galactoside alpha-2,3-sialyltransferase                                                                                | [g] : cmpacna + gt1b_hs -> cmp + gq1b_hs + h                                            | 2.4.99.8   | Sphingolipid Metabolism                   | 29906.1                                                                                                        |
| ST8SIA53g    | Beta-galactoside alpha-2,3-sialyltransferase                                                                                | [g] : cmpacna + gd1a_hs -> cmp + gt1a_hs + h                                            | 2.4.99.8   | Sphingolipid Metabolism                   | 29906.1                                                                                                        |
| ST8SIA54g    | Beta-galactoside alpha-2,3-sialyltransferase                                                                                | [g] : cmpacna + gm1b_hs -> cmp + gd1c_hs + h                                            | 2.4.99.8   | Sphingolipid Metabolism                   | 29906.1                                                                                                        |
| ST8SIA55g    | Beta-galactoside alpha-2,3-sialyltransferase                                                                                | [g] : cmpacna + gq1c_hs -> cmp + gp1calpha_hs + h                                       | 2.4.99.8   | Sphingolipid Metabolism                   | 29906.1                                                                                                        |
| ST8SIA56g    | Alpha-2,8-sialyltransferase 8E                                                                                              | [g] : acngal14clegalgulsid_hs + cmpacna -> acn23acngal14clegalgulsid_hs + cmp + h       | 2.4.99.8   | Blood Group Biosynthesis                  | 29906.1                                                                                                        |
| STCOAix      | fatty acid intracellular transport                                                                                          | stcoa[c] <=> stcoa[x]                                                                   |            | Transport, Peroxisomal                    |                                                                                                                |
| STRDNCCPT1   | carnitine O-palmitoyltransferase                                                                                            | [c] : crn + strdncco -> coa + strdnccrn                                                 | 2.3.1.21   | Carnitine shuttle                         | (1375.4 or 1374.1 or 126129.1 or 1375.3 or 1375.2 or 1375.1)                                                   |
| STRDNCCPT2   | carnitine transferase                                                                                                       | [m] : coa + strdnccrn -> crn + strdncco                                                 |            | Carnitine shuttle                         | 1376.1                                                                                                         |
| STRDNCCRNt   | transport into the mitochondria (carnitine)                                                                                 | strdnccrn[c] -> strdnccrn[m]                                                            |            | Carnitine shuttle                         | 788.1                                                                                                          |
| STRDNCTi     | fatty acid transport via diffusion                                                                                          | strdncc[c] <=> strdncc[e]                                                               |            | Transport, Extracellular                  |                                                                                                                |
| STSI         | Steryl-sulfatase                                                                                                            | [c] : dheas + h2o -> dhea + h + so4                                                     | 3.1.6.2    | Steroid Metabolism                        | 412.1                                                                                                          |
| STSIr        | Steryl-sulfatase                                                                                                            | [r] : dheas + h2o -> dhea + h + so4                                                     | 3.1.6.2    | Steroid Metabolism                        | 412.1                                                                                                          |
| STS2         | Steryl-sulfatase                                                                                                            | [c] : estrones + h2o -> estrone + h + so4                                               | 3.1.6.2    | Steroid Metabolism                        | 412.1                                                                                                          |
| STS2r        | Steryl-sulfatase                                                                                                            | [r] : estrones + h2o -> estrone + h + so4                                               | 3.1.6.2    | Steroid Metabolism                        | 412.1                                                                                                          |
| STS3         | Steryl-sulfatase                                                                                                            | [c] : chsterols + h2o -> chsterol + h + so4                                             | 3.1.6.2    | Steroid Metabolism                        | 412.1                                                                                                          |
| STS3r        | Steryl-sulfatase                                                                                                            | [r] : chsterols + h2o -> chsterol + h + so4                                             | 3.1.6.2    | Steroid Metabolism                        | 412.1                                                                                                          |
| STS4         | Steryl-sulfatase                                                                                                            | [c] : h2o + prgnlones -> h + prgnlone + so4                                             | 3.1.6.2    | Steroid Metabolism                        | 412.1                                                                                                          |
| STS4r        | Steryl-sulfatase                                                                                                            | [r] : h2o + prgnlones -> h + prgnlone + so4                                             | 3.1.6.2    | Steroid Metabolism                        | 412.1                                                                                                          |
| SUCC12m      | succinate transport, mitochondrial                                                                                          | pi[m] + succ[c] <=> pi[c] + succ[m]                                                     |            | Transport, Mitochondrial                  | 1468.1                                                                                                         |
| SUCC4_2      | succinate transport via sodium symport                                                                                      | (2) na1[e] + succ[c] <=> (2) na1[c] + succ[c]                                           |            | Transport, Extracellular                  | 9058.1                                                                                                         |
| SUCC4_3      | succinate transport via sodium symport                                                                                      | (3) na1[e] + succ[c] <=> (3) na1[c] + succ[c]                                           |            | Transport, Extracellular                  | (64849.1 or 64849.2)                                                                                           |

| Abbreviation   | Reaction Name                                                      | Reaction                                                            | E.C. #    | Pathway                                     | Gene association                                               |
|----------------|--------------------------------------------------------------------|---------------------------------------------------------------------|-----------|---------------------------------------------|----------------------------------------------------------------|
| SUCCp          | succinate transporter, peroxisome                                  | succ[c] <=> succ[x]                                                 |           | Transport, Peroxisomal                      |                                                                |
| SUCD1m         | succinate dehydrogenase                                            | [m] : fad + succ <=> fadh2 + fum                                    | 1.3.99.1  | Citric Acid Cycle                           | ( 6389.1 and 6391.1 and 6392.1 and 6390.1 )                    |
| SUCOAS1m       | Succinate-CoA ligase (GDP-forming)                                 | [m] : coa + gtp + succ <=> gdp + pi + succoa                        | 6.2.1.4   | Citric Acid Cycle                           | ( 8802.1 and 8801.1 )                                          |
| SUCOASm        | Succinate-CoA ligase (ADP-forming)                                 | [m] : atp + coa + succ <=> adp + pi + succoa                        | 6.2.1.5   | Citric Acid Cycle                           | ( 8802.1 and 8803.1 )                                          |
| SUCRe          | sucrose hydrolyzing enzyme, extracellular                          | [e] : h2o + sucrr -> fru + glc-D                                    | 3.2.1.26  | Galactose metabolism                        | ( 6476.1 or 8972.1 )                                           |
| SULFOX         | sulfite oxidase                                                    | (2) ficyt[m] + h2o[c] + so3[c] -> (2) focytc[m] + (2) h[c] + so4[c] | 1.8.3.1   | Cysteine Metabolism                         | 6821.1                                                         |
| T2M26COAHLm    | trans-2-Methyl-5-isopropylhexa-2,5-dienoyl-CoA hydro-lyase (m)     | [m] : h2o + t2m26coa <=> 3h26dm5coa                                 | 4.2.1.17  | Limonene and pinene degradation             | ( 549.1 or ( 3030.1 and 3032.1 ) )                             |
| T2M26COAHLx    | trans-2-Methyl-5-isopropylhexa-2,5-dienoyl-CoA hydro-lyase (x)     | [x] : h2o + t2m26coa <=> 3h26dm5coa                                 | 4.2.1.17  | Limonene and pinene degradation             | ( 1891.1 or 1962.1 )                                           |
| T4HCINNMFM     | 4-hydroxycinnamate formation                                       | [m] : 34hpl -> T4hcinmm + h2o                                       |           | Ubiquinone Biosynthesis                     |                                                                |
| T4HCINNOX      | 4-Coumarate: oxygen oxidoreductase                                 | [c] : (2) T4hcinmm + o2 -> (2) 34hcinm                              | 1.14.18.1 | Stilbene, coumarine and lignin biosynthesis | 7299.1                                                         |
| TAGAT-Dt       | D-tagatose uptake via diffusion                                    | tagat-D[e] -> tagat-D[c]                                            |           | Transport, Extracellular                    |                                                                |
| TALA           | transaldolase                                                      | [c] : g3p + s7p <=> e4p + f6p                                       | 2.2.1.2   | Pentose Phosphate Pathway                   | 6888.1                                                         |
| TAUR4(2)r      | taurine transport (sodium symport) (2:1)                           | (2) na1[e] + taur[e] <=> (2) na1[c] + taur[c]                       |           | Transport, Extracellular                    | 6533.1                                                         |
| TAURcx         | taurine transport (sodium symport) (cytosol to peroxisome)         | na1[c] + taur[c] <=> na1[x] + taur[x]                               |           | Taurine and hypotaurine metabolism          | 6533.1                                                         |
| TAXOLe         | xenobiotic transport                                               | taxol[e] <=> taxol[c]                                               |           | Transport, Extracellular                    |                                                                |
| TCHOLAt        | taurocholate transport via bicarbonate countertransport            | hco3[c] + tchola[c] <=> hco3[e] + tchola[e]                         |           | Transport, Extracellular                    | ( 6579.1 or 10599.1 or 28234.1 or 28231.1 )                    |
| TCHOLAt2       | taurocholate transport via sodium cotransport                      | (2) na1[e] + tchola[e] -> (2) na1[c] + tchola[c]                    |           | Transport, Extracellular                    | ( 6554.1 or 6555.1 )                                           |
| TCHOLAt3       | ABC bile acid transporter                                          | atp[c] + h2o[c] + tchola[c] -> adp[c] + h[c] + pi[c] + tchola[e]    |           | Transport, Extracellular                    | ( 8647.1 or 8714.1 or 8714.2 or 8714.3 )                       |
| TCHOLAtc       | bile acid intracellular transport                                  | tchola[e] <=> tchola[c]                                             |           | Transport, Extracellular                    |                                                                |
| TCHOLAtx       | bile acid intracellular transport                                  | tchola[x] <=> tchola[c]                                             |           | Transport, Peroxisomal                      |                                                                |
| TCYNTt         | Thiocyanate transport via diffusion (cytosol to extracellular)     | tcym[e] -> tcym[e]                                                  |           | Transport, Extracellular                    |                                                                |
| TCYNTm         | Thiocyanate transport via diffusion (mitochondrial)                | tcym[m] -> tcym[c]                                                  |           | Transport, Mitochondrial                    |                                                                |
| TDCHOLAtc      | bile acid intracellular transport                                  | tdchola[e] <=> tdchola[c]                                           |           | Transport, Extracellular                    |                                                                |
| TDCHOLAtx      | bile acid intracellular transport                                  | tdchola[x] <=> tdchola[c]                                           |           | Transport, Peroxisomal                      |                                                                |
| TDP            | thiamine triphosphatase                                            | [c] : h2o + thmpp -> h + pi + thmmp                                 | 3.6.1.15  | Thiamine Metabolism                         |                                                                |
| TDPPRE         | dTDP-4-dehydrothiamose 3,5-epimerase                               | [c] : dtdp4d6dg -> dtdp4d6dm                                        | 5.1.3.13  | Nucleotide Sugar Metabolism                 |                                                                |
| TDPPRR         | dTDP-4-dehydrothiamose reductase                                   | [c] : dtdp4d6dm + h + nadph -> dtdprmm + nadp                       | 1.1.1.133 | Nucleotide Sugar Metabolism                 |                                                                |
| TDPDGH         | dTDPglucose 4,6-dehydratase                                        | [c] : dtdp4d6glu -> dtdp4d6gdg + h2o                                | 4.2.1.46  | Nucleotide Sugar Metabolism                 | 23483.1                                                        |
| TDPM           | thiamine triphosphatase, mitochondrial                             | [m] : h2o + thmpp -> h + pi + thmmp                                 | 3.6.1.15  | Thiamine Metabolism                         |                                                                |
| TETHEX3COAtx   | fatty acid intracellular transport                                 | tethex3coa[c] <=> tethex3coa[x]                                     |           | Transport, Peroxisomal                      |                                                                |
| TETHEX3t       | fatty acid transport via diffusion                                 | tethex3[e] <=> tethex3[c]                                           |           | Transport, Extracellular                    |                                                                |
| TETPENT3COAtx  | fatty acid intracellular transport                                 | tetpent3coa[c] <=> tetpent3coa[x]                                   |           | Transport, Peroxisomal                      |                                                                |
| TETPENT3CPT1   | carnitine O-palmitoyltransferase                                   | [c] : crn + tetpent3coa -> coa + tetpent3crm                        | 2.3.1.21  | Carnitine shuttle                           | ( 1375.4 or 1374.1 or 126129.1 or 1375.3 or 1375.2 or 1375.1 ) |
| TETPENT3CPT2   | carnitine transferase                                              | [m] : coa + tetpent3crm -> crn + tetpent3coa                        |           | Carnitine shuttle                           | 1376.1                                                         |
| TETPENT3CRNt   | transport into the mitochondria (carnitine)                        | tetpent3crm[c] -> tetpent3crm[m]                                    |           | Carnitine shuttle                           | 788.1                                                          |
| TETPENT3t      | fatty acid transport via diffusion                                 | tetpent3[e] <=> tetpent3[c]                                         |           | Transport, Extracellular                    |                                                                |
| TETPENT6COAtx  | fatty acid intracellular transport                                 | tetpent6coa[c] <=> tetpent6coa[x]                                   |           | Transport, Peroxisomal                      |                                                                |
| TETPENT6CPT1   | carnitine O-palmitoyltransferase                                   | [c] : crn + tetpent6coa -> coa + tetpent6crm                        | 2.3.1.21  | Carnitine shuttle                           | ( 1375.4 or 1374.1 or 126129.1 or 1375.3 or 1375.2 or 1375.1 ) |
| TETPENT6CPT2   | carnitine transferase                                              | [m] : coa + tetpent6crm -> crn + tetpent6coa                        |           | Carnitine shuttle                           | 1376.1                                                         |
| TETPENT6CRNt   | transport into the mitochondria (carnitine)                        | tetpent6crm[c] -> tetpent6crm[m]                                    |           | Carnitine shuttle                           | 788.1                                                          |
| TETPENT6t      | fatty acid transport via diffusion                                 | tetpent6[e] <=> tetpent6[c]                                         |           | Transport, Extracellular                    |                                                                |
| TETPENT6COAtx  | fatty acid intracellular transport                                 | tetpent6coa[c] <=> tetpent6coa[x]                                   |           | Transport, Peroxisomal                      |                                                                |
| TETPENT6CPT1   | carnitine O-palmitoyltransferase                                   | [c] : crn + tetpent6coa -> coa + tetpent6crm                        | 2.3.1.21  | Carnitine shuttle                           | ( 1375.4 or 1374.1 or 126129.1 or 1375.3 or 1375.2 or 1375.1 ) |
| TETPENT6CPT2   | carnitine transferase                                              | [m] : coa + tetpent6crm -> crn + tetpent6coa                        |           | Carnitine shuttle                           | 1376.1                                                         |
| TETPENT6CRNt   | transport into the mitochondria (carnitine)                        | tetpent6crm[c] -> tetpent6crm[m]                                    |           | Carnitine shuttle                           | 788.1                                                          |
| TETPENT6t      | fatty acid transport via diffusion                                 | tetpent6[e] <=> tetpent6[c]                                         |           | Transport, Extracellular                    |                                                                |
| THBPT4ACAMDASE | Tetrahydrobiopterin-4a-carbinolamine dehydratase                   | [c] : thbpt4acam -> dhbpt + h2o                                     | 4.2.1.96  | Tetrahydrobiopterin                         | ( 5092.1 or 5092.2 )                                           |
| THCHOLSTOICm   | lipid, flip-flop intracellular transport                           | thcholstoic[m] <=> thcholstoic[x]                                   |           | Transport, Peroxisomal                      |                                                                |
| THD1m          | NAD(P) transhydrogenase                                            | h[c] + nadh[m] + nadp[m] <=> h[m] + nad[m] + nadph[m]               | 1.6.1.1   | NAD Metabolism                              | ( 23530.2 or 23530.1 )                                         |
| THF2           | tetrahydrofolate transport via anion exchange                      | oh1[c] + thf[e] <=> oh1[e] + thf[c]                                 |           | Transport, Extracellular                    | ( 6573.1 or 6573.2 )                                           |
| THFt           | 5,6,7,8-Tetrahydrofolate transport, diffusion, lysosomal           | thf[c] <=> thf[l]                                                   |           | Transport, Lysosomal                        |                                                                |
| THFm           | 5,6,7,8-Tetrahydrofolate transport, diffusion, mitochondrial       | thf[c] <=> thf[m]                                                   |           | Transport, Mitochondrial                    |                                                                |
| THMDt4         | thymidine transport in via sodium symport                          | na1[e] + thymd[e] -> na1[c] + thymd[c]                              |           | Transport, Extracellular                    | ( 9154.1 or 64078.1 or 9154.2 )                                |
| THMDt5         | thymidine transport (1:2 Na/Thymd cotransport)                     | (2) na1[e] + thymd[e] -> (2) na1[c] + thymd[c]                      |           | Transport, Extracellular                    | 64078.1                                                        |
| THMMPt4        | Thiamine monophosphate transport in via anion antiport             | oh1[c] + thmmp[e] <=> oh1[e] + thmmp[c]                             |           | Transport, Extracellular                    | ( 6573.1 or 6573.2 )                                           |
| THMMPtm        | Thiamine monophosphate transport, mitochondrial                    | oh1[m] + thmmp[c] <=> oh1[c] + thmmp[m]                             |           | Transport, Mitochondrial                    |                                                                |
| THMP           | thiamin phosphatase                                                | [c] : h2o + thmmp -> pi + thm                                       |           | Thiamine Metabolism                         |                                                                |
| THMPPtm        | Thiamine diphosphate transport in via anion antiport, mitochondria | (2) oh1[m] + thmpp[c] -> (2) oh1[c] + thmpp[m]                      |           | Transport, Mitochondrial                    |                                                                |
| THMt2m         | Thiamine transport in via proton symport, mitochondrial            | h[c] + thm[c] -> h[m] + thm[m]                                      |           | Transport, Mitochondrial                    |                                                                |
| THM3           | Thiamine transport in via proton antiport                          | h[c] + thm[e] <=> h[e] + thm[c]                                     |           | Transport, Extracellular                    | ( 80704.1 or 10560.1 )                                         |
| THMTP          | thiamine-triphosphatase                                            | [c] : h2o + thmtp -> h + pi + thmpp                                 | 3.6.1.28  | Thiamine Metabolism                         | 79178.1                                                        |
| THMTPt         | Thiamine triphosphate transport in via anion antiport              | (3) oh1[e] + thmtp[c] -> (3) oh1[c] + thmtp[e]                      |           | Transport, Extracellular                    | ( 6573.1 or 6573.2 )                                           |
| THP2Ctp        | 2,3,4,5-Tetrahydropyridine-2-carboxylate transport, peroxisomal    | thp2c[e] <=> thp2c[x]                                               |           | Transport, Peroxisomal                      |                                                                |
| THRALANaEx     | L-alanine/L-threonine Na-dependent exchange (Thr-L in)             | ala-L[c] + na1[e] + thr-L[e] -> ala-L[e] + na1[c] + thr-L[c]        |           | Transport, Extracellular                    | ( 6509.1 or 6510.1 )                                           |

| Abbreviation    | Reaction Name                                                            | Reaction                                                                       | E.C. #     | Pathway                                   | Gene association                                               |
|-----------------|--------------------------------------------------------------------------|--------------------------------------------------------------------------------|------------|-------------------------------------------|----------------------------------------------------------------|
| THRASNEx        | L-threonine/L-asparagine Na-dependent exchange (Thr-L in)                | asn-L[c] + na1[e] + thr-L[e] -> asn-L[e] + na1[c] + thr-L[c]                   |            | Transport, Extracellular                  | 6510.1                                                         |
| THRCYSNaEx      | L-cysteine/L-threonine Na-dependent exchange (Thr-L in)                  | cys-L[c] + na1[e] + thr-L[e] -> cys-L[e] + na1[c] + thr-L[c]                   |            | Transport, Extracellular                  | ( 6509.1 or 6510.1 )                                           |
| THRD_L          | L-threonine deaminase                                                    | [c] : thr-L -> 2obut + nh4                                                     |            | Glycine, Serine, and Threonine Metabolism | 10993.1                                                        |
| THRGLNexR       | L-threonine/glycine reversible exchange                                  | gln-L[c] + thr-L[e] <=> gln-L[e] + thr-L[c]                                    |            | Transport, Extracellular                  | ( 6520.1 and 56301.1 )                                         |
| THRGLNEx        | L-threonine/L-glutamine Na-dependent exchange (Thr-L in)                 | gln-L[c] + na1[e] + thr-L[e] -> gln-L[e] + na1[c] + thr-L[c]                   |            | Transport, Extracellular                  | 6510.1                                                         |
| THRGLYexR       | L-threonine/glycine reversible exchange                                  | gly[c] + thr-L[e] <=> gly[e] + thr-L[c]                                        |            | Transport, Extracellular                  | ( 6520.1 and 56301.1 )                                         |
| THRS            | threonine synthase                                                       | [c] : h2o + phom -> pi + thr-L                                                 | 4.2.3.1    | Glycine, Serine, and Threonine Metabolism | 79896.1                                                        |
| THRSERNaEx      | L-serine/L-threonine Na-dependent exchange (Thr-L in)                    | na1[e] + ser-L[c] + thr-L[e] -> na1[c] + ser-L[e] + thr-L[c]                   |            | Transport, Extracellular                  | ( 6509.1 or 6510.1 )                                           |
| THR4            | L-threonine via sodium symport                                           | na1[e] + thr-L[e] -> na1[c] + thr-L[c]                                         |            | Transport, Extracellular                  | ( 11254.1 or 54407.1 or 81539.1 )                              |
| THYMD1          | thymd transport                                                          | thymd[e] -> thymd[c]                                                           |            | Transport, Extracellular                  | ( 3177.1 or 2030.1 )                                           |
| THYMD1          | thymidine facilitated transport from lysosome                            | thymd[l] <=> thymd[c]                                                          |            | Transport, Lysosomal                      | 55315.1                                                        |
| THYMDtm         | thymd transport                                                          | thymd[c] <=> thymd[m]                                                          |            | Transport, Mitochondrial                  | 2030.1                                                         |
| THYMt           | thymine reversible transport via facilitated diffusion                   | thym[e] <=> thym[c]                                                            |            | Transport, Extracellular                  | 3177.1                                                         |
| THYOX1          | T4 transport via bicarbonate countertransport                            | hco3[c] + thyox-L[e] <=> hco3[e] + thyox-L[c]                                  |            | Transport, Extracellular                  | ( 6579.1 or 10599.1 or 28231.1 or 53919.1 )                    |
| THYOX2          | T4 transport via facilitated diffusion                                   | thyox-L[e] <=> thyox-L[c]                                                      |            | Transport, Extracellular                  | 6567.1                                                         |
| THYPX           | thyroid peroxidase                                                       | [c] : (2) h + h2o2 + (2) i -> (2) h2o + iodine                                 |            | Tyrosine metabolism                       | ( 7173.1 or 7173.2 or 7173.3 or 7173.4 or 7173.5 )             |
| TKT1            | transketolase                                                            | [c] : r5p + xu5p-D <=> g3p + s7p                                               | 2.2.1.1    | Pentose Phosphate Pathway                 | ( 7086.1 or 8277.1 or 84076.1 )                                |
| TKT2            | transketolase                                                            | [c] : e4p + xu5p-D <=> f6p + g3p                                               | 2.2.1.1    | Pentose Phosphate Pathway                 | ( 7086.1 or 8277.1 or 84076.1 )                                |
| TMABADH         | 4-trimethylaminobutylaldehyde dehydrogenase                              | [c] : 4tmeabut + h2o + nad -> 4tmeabuta + (2) h + nadh                         | 1.2.1.47   | Lysine Metabolism                         | 223.1                                                          |
| TMDK1           | thymidine kinase (ATP:thymidine)                                         | [e] : atp + thymd -> adp + dtmp + h                                            | 2.7.1.21   | Nucleotides                               | ( 7084.1 or 7083.1 )                                           |
| TMDK1m          | thymidine kinase (ATP:thymidine)                                         | [m] : atp + thymd -> adp + dtmp + h                                            | 2.7.1.21   | Nucleotides                               | 7084.1                                                         |
| TMDPK           | thiamine diphosphokinase                                                 | [c] : atp + thm -> amp + h + thmp                                              | 2.7.6.2    | Thiamine Metabolism                       | 27010.1                                                        |
| TMDPP           | thymidine phosphorylase                                                  | [c] : pi + thymd <=> 2dtp + thym                                               | 2.4.2.4    | Pyrimidine Catabolism                     | 1890.1                                                         |
| TMDPPK          | thiamine-diphosphate kinase                                              | [c] : atp + thmp -> adp + thmp                                                 | 2.7.4.15   | Thiamine Metabolism                       |                                                                |
| TMD5            | thymidylate synthase                                                     | [c] : dtmp + mthf -> dhf + dtmp                                                | 2.1.1.45   | Nucleotides                               | 7298.1                                                         |
| TMLYSOX         | trimethyllysine dioxygenase                                              | [c] : ak3 + o2 + tmlys -> 3tmelys + co2 + succ                                 | 1.14.11.8  | Lysine Metabolism                         | 55217.1                                                        |
| TMLYSter        | trimethyl-L-lysine transport (ER to cytosol)                             | tmlys[r] -> tmlys[c]                                                           |            | Transport, Endoplasmic Reticular          |                                                                |
| TMNDNCCOAix     | fatty acid intracellular transport                                       | tmndncco[a] <=> tmndncco[x]                                                    |            | Transport, Peroxisomal                    |                                                                |
| TMNDNCCPT1      | carnitine O-palmitoyltransferase                                         | [c] : crn + tmndncco -> coa + tmndnccrn                                        | 2.3.1.21   | Carnitine shuttle                         | ( 1375.4 or 1374.1 or 126129.1 or 1375.3 or 1375.2 or 1375.1 ) |
| TMNDNCCPT2      | carnitine transferase                                                    | [m] : coa + tmndnccrn -> crn + tmndncco                                        |            | Carnitine shuttle                         | 1376.1                                                         |
| TMNDNCCRNt      | transport into the mitochondria (carnitine)                              | tmndnccrn[c] -> tmndnccrn[m]                                                   |            | Carnitine shuttle                         | 788.1                                                          |
| TMNDNcT         | fatty acid transport via diffusion                                       | tmndnc[e] <=> tmndnc[c]                                                        |            | Transport, Extracellular                  |                                                                |
| TOLBUTAMIDEt    | xenobiotic transport                                                     | tolbutamide[e] <=> tolbutamide[c]                                              |            | Transport, Extracellular                  |                                                                |
| TPI             | triose-phosphate isomerase                                               | [c] : dhap <=> g3p                                                             | 5.3.1.1    | Glycolysis/Gluconeogenesis                | ( 7167.1 or 286016.1 )                                         |
| TRDR            | thioredoxin reductase (NADPH)                                            | [c] : h + nadph + trdox -> nadp + trdr                                         | 1.8.1.9    | Nucleotides                               | ( 7296.1 or 7296.2 or 7296.4 or 7296.3 )                       |
| TRDR2           | Thioredoxin (ubiquinone 10) reductase (NADPH)                            | [c] : h + nadph + q10 -> nadp + q10h2                                          | 1.8.1.9    | Miscellaneous                             | ( 7296.4 or 7296.3 or 7296.2 or 7296.1 )                       |
| TRDR3           | Thioredoxin (ubiquinone 10) reductase (NADH)                             | [c] : h + nadh + q10 -> nad + q10h2                                            | 1.8.1.9    | Miscellaneous                             | ( 7296.1 or 7296.2 or 7296.3 or 7296.4 )                       |
| TRDRm           | thioredoxin reductase (NADPH)                                            | [m] : h + nadph + trdox -> nadp + trdr                                         | 1.8.1.9    | Nucleotides                               | ( 10587.1 or 10587.2 or 10587.3 or 114112.1 )                  |
| TREH            | alpha, alpha-trehalase                                                   | [c] : h2o + tre -> (2) glc-D                                                   | 3.2.1.28   | Starch and Sucrose Metabolism             | 80162.1                                                        |
| TREHe           | alpha, alpha-trehalase                                                   | [e] : h2o + tre -> (2) glc-D                                                   | 3.2.1.28   | Starch and Sucrose Metabolism             | 11181.1                                                        |
| TRIODTHYSUFt    | Triiodothyronine sulfate transport (diffusion)                           | triodthysuf[c] -> triodthysuf[e]                                               |            | Transport, Extracellular                  |                                                                |
| TRIODTHYSULT    | Triiodothyronine Sulfotransferase                                        | [c] : paps + triodthy -> h + pap + triodthysuf                                 | 2.8.2.1    | Tyrosine metabolism                       | ( 6817.1 or 6817.2 or 6817.3 or 6817.4 or 6817.5 )             |
| TRIODTHYt       | T3 transport via bicarbonate countertransport                            | hco3[c] + triodthy[e] <=> hco3[e] + triodthy[c]                                |            | Transport, Extracellular                  | ( 28231.1 or 6579.1 or 10599.1 or 28234.1 or 53919.1 )         |
| TRIODTHY2       | T3 transport via facilitated diffusion                                   | triodthy[e] <=> triodthy[c]                                                    |            | Transport, Extracellular                  | 6567.1                                                         |
| TRIOK           | trio kinase                                                              | [c] : atp + glyald -> adp + g3p + h                                            | 2.7.1.28   | Fructose and Mannose Metabolism           |                                                                |
| TRPHYDRO2       | L-Tryptophan,tetrahydrobiopterin:oxygen oxidoreductase (5-hydroxylating) | [c] : o2 + thbpt + trp-L -> 5htrp + thbpt4acam                                 | 1.14.16.4  | Tryptophan metabolism                     | ( 7166.1 or 121278.1 )                                         |
| TRPO2           | L-Tryptophan:oxygen 2,3-oxidoreductase (decyclizing)                     | [c] : o2 + trp-L -> Lfmkynr                                                    | 1.13.11.11 | Tryptophan metabolism                     | 6999.1                                                         |
| TRPt            | L-tryptophan transport                                                   | trp-L[e] <=> trp-L[c]                                                          |            | Transport, Extracellular                  | 117247.1                                                       |
| TRP4            | L-tryptophan transport in via sodium symport                             | na1[e] + trp-L[e] -> na1[c] + trp-L[c]                                         |            | Transport, Extracellular                  | 11254.1                                                        |
| TRYPTAOX        | Tryptamine:oxygen oxidoreductase(deaminating)(flavin-containing)         | [c] : h2o + o2 + trypta -> h2o2 + id3acald + nh4                               | 1.4.3.4    | Tryptophan metabolism                     | ( 4128.1 or 4129.1 or 26.1 or 314.1 or 314.2 )                 |
| TS3             | Tachysterol 3 formation                                                  | [c] : pd3 <=> ts3                                                              |            | Vitamin D                                 |                                                                |
| TSTSTERONEGLcTc | glucuronidated compound transport                                        | atp[e] + h2o[c] + tststeroneglc[e] -> adp[e] + h[c] + pi[c] + tststeroneglc[e] |            | Transport, Extracellular                  | 4363.1                                                         |
| TSTSTERONEGLcTr | glucuronidated compound transport                                        | tststeroneglc[e] <=> tststeroneglc[r]                                          |            | Transport, Endoplasmic Reticular          |                                                                |
| TSTSTERONESt    | sulfonated testosterone transport                                        | tststerone[s] <=> tststerone[e]                                                |            | Transport, Extracellular                  |                                                                |
| TSTSTERONESult  | testosterone sulfotransferase                                            | [c] : paps + tststerone -> h + pap + tststerones                               | 2.8.2.2    | Steroid Metabolism                        | ( 6822.1 or 6822.1 )                                           |
| TSTSTERONer     | testosterone intracellular transport                                     | tststerone[r] <=> tststerone[c]                                                |            | Transport, Endoplasmic Reticular          |                                                                |
| TSUL4_3         | thiosulfate transport via sodium symport                                 | (3) na1[e] + tsul[e] <=> (3) na1[c] + tsul[c]                                  |            | Transport, Extracellular                  | 6561.1                                                         |
| TTDCAt          | Tetradecanoate (n-C14:0) transport in via uniport                        | tdca[e] -> tdca[c]                                                             |            | Transport, Extracellular                  |                                                                |
| TTDCPT1         | carnitine O-palmitoyltransferase                                         | [c] : crn + tdcoa -> coa + tdcrn                                               | 2.3.1.21   | Carnitine shuttle                         | ( 1374.1 or 126129.1 or 1375.2 or 1375.3 or 1375.4 or 1375.1 ) |
| TTDCPT2         | carnitine transferase                                                    | [m] : coa + tdcrn -> crn + tdcoa                                               |            | Carnitine shuttle                         | 1376.1                                                         |



| Abbreviation | Reaction Name                                                            | Reaction                                                | E.C. #    | Pathway                                  | Gene association                                                                |
|--------------|--------------------------------------------------------------------------|---------------------------------------------------------|-----------|------------------------------------------|---------------------------------------------------------------------------------|
| ITDCRNt      | transport into the mitochondria (carnitine)                              | ttc[crn] -> ttdc[crn]                                   |           | Carnitine shuttle                        | 788.1                                                                           |
| TXA2te       | thromboxane A2 transport                                                 | txa2[e] <=> txa2[e]                                     |           | Transport, Extracellular                 |                                                                                 |
| TXA2tr       | thromboxane A2 intracellular transport                                   | txa2[c] <=> txa2[r]                                     |           | Transport, Endoplasmic Reticular         |                                                                                 |
| TXASr        | Thromboxane-A synthase                                                   | [r] : prostg2 -> txa2                                   | 5.3.99.5  | Eicosanoid Metabolism                    | 6916.1                                                                          |
| TYMSFt       | Tyramine O-sulfate transport (diffusion)                                 | tyms[c] -> tyms[e]                                      |           | Transport, Extracellular                 |                                                                                 |
| TYMSULT      | Tyramine Sulfotransferase                                                | [c] : paps + tym -> h + pap + tymsf                     | 2.8.2.1   | Tyrosine metabolism                      | (6817.1 or 6817.2 or 6817.3 or 6817.4 or 6817.5 or 6818.1 or 6818.2 or 6818.3 ) |
| TYR3MO2      | tyrosine 3-monoxygenase                                                  | [c] : o2 + thbpt + tyr-L -> 34dhpe + thbpt4acam         | 1.14.16.2 | Tyrosine metabolism                      | (7054.1 or 7054.2 or 7054.3 )                                                   |
| TYRASE       | Tyrosinase                                                               | [c] : 56dihindlrbxlt -> melanin                         | 1.14.18   | Tyrosine metabolism                      | 7306.1                                                                          |
| TYRCBOX      | L-Tyrosine carboxy-lyase                                                 | [c] : h + tyr-L -> co2 + tym                            | 4.1.1.25  | Tyrosine metabolism                      | 1644.1                                                                          |
| TYRDOPO      | Tyrosine:dopa oxidase                                                    | [c] : o2 + (2) tyr-L -> (2) 34dhpe                      | 1.14.18.1 | Tyrosine metabolism                      | 7299.1                                                                          |
| TYRDOPO3     | Tyrosine:dopa oxidase (dopaquinone producing 2)                          | [c] : (2) 34dhpe + o2 -> (2) dopaqn + (2) h2o           | 1.14.18.1 | Tyrosine metabolism                      | 7299.1                                                                          |
| TYROXDac     | Tyramine:oxygen oxidoreductase(deaminating)(flavin containing) (cytosol) | [c] : h2o + o2 + tym -> 4hoxpacd + h2o2 + nh4           | 1.4.3.6   | Tyrosine metabolism                      | (4128.1 or 4129.1 )                                                             |
| TYRt         | L-tyrosine transport                                                     | tyr-L[e] <=> tyr-L[c]                                   |           | Transport, Extracellular                 | 117247.1                                                                        |
| TYR4         | L-tyrosine transport in via sodium symport                               | na[e] + tyr-L[e] -> na[c] + tyr-L[c]                    |           | Transport, Extracellular                 | 11254.1                                                                         |
| TYRTA        | tyrosine transaminase                                                    | [c] : akc + tyr-L <=> 34hpp + glu-L                     | 2.6.1.5   | Tyrosine metabolism                      | 2805.1                                                                          |
| TYRTAm       | tyrosine transaminase, mitochondrial                                     | [m] : akc + tyr-L <=> 34hpp + glu-L                     | 2.6.1.5   | Tyrosine metabolism                      | (6898.1 or 2806.1 )                                                             |
| UAG2EMAi     | UDP-N-acetyl-D-glucosamine 2-epimerase (Hydrolysis)                      | [c] : h2o + uacgam -> acmana + h + udp                  | 5.1.3.14  | Aminosugar Metabolism                    | 10020.1                                                                         |
| UAG4E        | UDP-N-acetylglucosamine 4-epimerase                                      | [c] : uacgam <=> udpacgal                               | 5.1.3.7   | Aminosugar Metabolism                    | (2582.1 or 2582.2 )                                                             |
| UAGALDP      | UDP-N-acetylglucosamine diphosphorylase                                  | [c] : acgal1p + h + utp -> ppi + udpacgal               |           | Aminosugar Metabolism                    |                                                                                 |
| UAGADP       | UDP-N-acetylglucosamine diphosphorylase                                  | [c] : acgam1p + h + utp -> ppi + uacgam                 | 2.7.7.23  | Aminosugar Metabolism                    | (6675.1 or 91373.1 )                                                            |
| UDPACGALt    | udpacgal intracellular transport                                         | udpacgal[c] <=> udpacgal[l]                             |           | Transport, Lysosomal                     |                                                                                 |
| UDPDLPT_L    | UDP-glucose:dolichyl-phosphate beta-D-glucosyltransferase (liver)        | [c] : (0.1) dolp_L + udpg -> (0.1) dolglep_L + udp      | 2.4.1.117 | N-Glycan Biosynthesis                    | 29880.1                                                                         |
| UDPDLPT_U    | UDP-glucose:dolichyl-phosphate beta-D-glucosyltransferase (uterus)       | [c] : (0.1) dolp_U + udpg -> (0.1) dolglep_U + udp      | 2.4.1.117 | N-Glycan Biosynthesis                    | 29880.1                                                                         |
| UDPG1P       | UDPglucuronate uridine-monophosphohydrolase                              | [c] : h2o + udpglc -> glcur1p + (2) h + ump             |           | Pentose and Glucuronate Interconversions |                                                                                 |
| UDPG4E       | UDPglucose 4-epimerase                                                   | [c] : udpg <=> udpgal                                   | 5.1.3.2   | Galactose metabolism                     | (2582.1 or 2582.2 )                                                             |
| UDPGALg      | UDP-Gal Golgi transport via CMP antiport                                 | udpgal[c] + ump[g] <=> udpgal[g] + ump[c]               |           | Transport, Golgi Apparatus               | 7355.1                                                                          |
| UDPGD        | UDPglucose 6-dehydrogenase                                               | [c] : h2o + (2) nad + udpg -> (3) h + (2) nadh + udpglc | 1.1.1.22  | Starch and Sucrose Metabolism            | 7358.1                                                                          |
| UDPGLCAter   | UDPGlcA endoplasmic reticulum transport via UMP antiport                 | udpglc[r] + ump[c] <=> udpglc[c] + ump[r]               |           | Transport, Endoplasmic Reticular         | 23169.1                                                                         |
| UDPGLCAg     | UDPGlcA Golgi transport via UMP antiport                                 | udpglc[g] + ump[c] <=> udpglc[c] + ump[g]               |           | Transport, Golgi Apparatus               |                                                                                 |
| UDPGLCter    | UDP-Glc endoplasmic reticulum transport via CMP antiport                 | udpg[c] + ump[r] <=> udpg[r] + ump[c]                   |           | Transport, Endoplasmic Reticular         |                                                                                 |
| UDPGLCg      | UDP-Glc Golgi transport via CMP antiport                                 | udpg[c] + ump[g] <=> udpg[g] + ump[c]                   |           | Transport, Golgi Apparatus               | ( 23443.1 or 11046.1 or 84912.1 )                                               |
| UDPGLCDg     | UDP-D-glucuronate decarboxylase, Golgi apparatus                         | [g] : h + udpglc -> co2 + udpxyl                        | 4.1.1.35  | Nucleotide Sugar Metabolism              | 80146.1                                                                         |
| UDPGNP       | UDPglucuronate uridine-diphosphohydrolase                                | [c] : h2o + udpglc -> glcur + h + udp                   |           | Pentose and Glucuronate Interconversions |                                                                                 |
| UDPGP        | UDPglucose pyrophosphohydrolase                                          | [c] : h2o + udpg -> g1p + (2) h + ump                   | 3.6.1.9   | Starch and Sucrose Metabolism            | ( 5167.1 or 5168.1 or 5169.1 )                                                  |
| UDPt         | udp intracellular transport                                              | udp[c] <=> udp[l]                                       |           | Transport, Lysosomal                     |                                                                                 |
| UDPXylter    | UDP-Xyl endoplasmic reticular transport via CMP antiport                 | udpxyl[c] + ump[r] <=> udpxyl[r] + ump[c]               |           | Transport, Endoplasmic Reticular         |                                                                                 |
| UDPXylg      | UDP-Xyl Golgi transport via CMP antiport                                 | udpxyl[c] + ump[g] <=> udpxyl[g] + ump[c]               |           | Transport, Golgi Apparatus               | 84912.1                                                                         |
| UGALGTg      | UDPGalactose:D-glucose 4-beta-D-galactosyltransferase, Golgi apparatus   | [g] : glc-D + udpgal -> h + lctis + udp                 | 2.4.1.22  | Galactose metabolism                     | ( ( 3906.1 and 2683.1 ) or 8704.1 or 8704.2 )                                   |
| UGALNACter   | UDP-GalNAc endoplasmic reticulum transport via CMP antiport              | udpacgal[c] + ump[r] <=> udpacgal[r] + ump[c]           |           | Transport, Endoplasmic Reticular         | 23169.1                                                                         |
| UGALNACg     | UDP-GalNAc Golgi transport via CMP antiport                              | udpacgal[c] + ump[g] <=> udpacgal[g] + ump[c]           |           | Transport, Golgi Apparatus               | 7355.1                                                                          |
| UGCG         | Ceramide glucosyltransferase                                             | [r] : crm_hs + udpg -> gluside_hs + h + udp             | 2.4.1.80  | Sphingolipid Metabolism                  | 7357.1                                                                          |
| UGLCNACg     | UDP-GlcNAc Golgi transport via CMP antiport                              | uacgam[c] + ump[g] <=> uacgam[g] + ump[c]               |           | Transport, Golgi Apparatus               | 11046.1                                                                         |
| UGLT         | UDPglucose--hexose-1-phosphate uridylyltransferase                       | [c] : gal1p + udpg <=> g1p + udpgal                     | 2.7.7.12  | Galactose metabolism                     | ( 2592.1 or 2592.2 or 2592.3 )                                                  |
| UGT1A10r     | UDP-glucuronosyltransferase 1-10 precursor, microsomal                   | [r] : bilirub + (2) h + udpglc <=> bilglcur + udp       | 2.4.1.17  | Steroid Metabolism                       | 54576.1                                                                         |
| UGT1A1r      | UDP-glucuronosyltransferase 1-10 precursor, microsomal                   | [r] : estrone + udpglc -> estroneglc + udp              | 2.4.1.17  | Steroid Metabolism                       | ( 54575.1 or 54576.1 )                                                          |
| UGT1A2r      | UDP-glucuronosyltransferase 1-10 precursor, microsomal                   | [r] : bilirub + (2) udpglc -> bilglcur + (2) udp        | 2.4.1.17  | Steroid Metabolism                       | ( 54575.1 or 54576.1 )                                                          |
| UGT1A3r      | UDP-glucuronosyltransferase 1-10 precursor, microsomal                   | [r] : andstrm + udpglc -> andstrmglc + udp              | 2.4.1.17  | Steroid Metabolism                       | ( 54575.1 or 54576.1 or 54490.1 or 7367.1 )                                     |
| UGT1A4r      | UDP-glucuronosyltransferase 1-10 precursor, microsomal                   | [r] : tststerone + udpglc -> tststeroneglc + udp        | 2.4.1.17  | Steroid Metabolism                       | ( 54575.1 or 54576.1 or 54490.1 )                                               |
| UGT1A5r      | UDP-glucuronosyltransferase 1-10 precursor, microsomal                   | [r] : retn + udpglc -> retnglc + udp                    | 2.4.1.17  | Vitamin A Metabolism                     | ( 54575.1 or 54576.1 )                                                          |
| UGT1A5r2     | UDP-glucuronosyltransferase 1-10 precursor, microsomal (13-cis)          | [r] : 13-cis-retn + udpglc -> 13-cis-retnglc + udp      | 2.4.1.17  | Vitamin A Metabolism                     | ( 54576.1 or 54575.1 )                                                          |
| UGT1A6r      | UDP-glucuronosyltransferase 1-10 precursor, microsomal                   | [r] : estradiol + udpglc -> estradiolglc + udp          | 2.4.1.17  | Steroid Metabolism                       | ( 54575.1 or 54576.1 )                                                          |
| UGT1A7r      | UDP-glucuronosyltransferase 1-10 precursor, microsomal                   | [r] : ahandrostan + udpglc -> ahandrostannglc + udp     | 2.4.1.17  | Steroid Metabolism                       | ( 54575.1 or 54576.1 )                                                          |
| UGT1A8r      | UDP-glucuronosyltransferase 1-10 precursor, microsomal                   | [r] : estriol + udpglc -> estriolglc + udp              | 2.4.1.17  | Steroid Metabolism                       | ( 54575.1 or 54576.1 or 54490.1 or 7363.1 )                                     |
| UGT1A9r      | UDP-glucuronosyltransferase 1-10 precursor, microsomal                   | [r] : 5adststerone + udpglc -> 5adststeroneglc + udp    | 2.4.1.17  | Steroid Metabolism                       | 54490.1                                                                         |
| UMPK         | UMP kinase                                                               | [c] : atp + ump <=> adp + udp                           | 2.7.4.14  | Nucleotides                              | 51727.1                                                                         |
| UMPK2        | UMP kinase (CTP)                                                         | [c] : ctp + ump <=> cdtp + udp                          | 2.7.4.14  | Nucleotides                              | 51727.1                                                                         |
| UMPK2n       | UMP kinase (CTP),nuclear                                                 | [n] : ctp + ump <=> cdtp + udp                          | 2.7.4.14  | Nucleotides                              | 51727.1                                                                         |
| UMPK3        | UMP kinase (UTP)                                                         | [c] : utp + ump <=> (2) udp                             | 2.7.4.14  | Nucleotides                              | 51727.1                                                                         |
| UMPK3n       | UMP kinase (UTP),nuclear                                                 | [n] : utp + ump <=> (2) udp                             | 2.7.4.14  | Nucleotides                              | 51727.1                                                                         |
| UMPK4        | UMP kinase (GTP)                                                         | [c] : gtp + ump <=> gdp + udp                           | 2.7.4.14  | Nucleotides                              | 51727.1                                                                         |

| Abbreviation | Reaction Name                                                               | Reaction                                                       | E.C. #    | Pathway                                    | Gene association                                               |
|--------------|-----------------------------------------------------------------------------|----------------------------------------------------------------|-----------|--------------------------------------------|----------------------------------------------------------------|
| UMPK4n       | UMP kinase (GTP),nuclear                                                    | [n] : gtp + ump <=> gdp + udp                                  | 2.7.4.14  | Nucleotides                                | 51727.1                                                        |
| UMPK5        | UMP kinase (dATP)                                                           | [c] : datp + ump <=> dadp + udp                                | 2.7.4.14  | Nucleotides                                | 51727.1                                                        |
| UMPK5n       | UMP kinase (dATP),nuclear                                                   | [n] : datp + ump <=> dadp + udp                                | 2.7.4.14  | Nucleotides                                | 51727.1                                                        |
| UMPK6        | UMP kinase (dCTP)                                                           | [c] : dctp + ump <=> dcdp + udp                                | 2.7.4.14  | Nucleotides                                | 51727.1                                                        |
| UMPK6n       | UMP kinase (dCTP),nuclear                                                   | [n] : dctp + ump <=> dcdp + udp                                | 2.7.4.14  | Nucleotides                                | 51727.1                                                        |
| UMPK7        | UMP kinase (dGTP)                                                           | [c] : dgtp + ump <=> dgdtp + udp                               | 2.7.4.14  | Nucleotides                                | 51727.1                                                        |
| UMPK7n       | UMP kinase (dGTP),nuclear                                                   | [n] : dgtp + ump <=> dgdtp + udp                               | 2.7.4.14  | Nucleotides                                | 51727.1                                                        |
| UMPKm        | UMP kinase (mitochondrial, ATP)                                             | [m] : atp + ump <=> adp + udp                                  | 2.7.4.14  | Nucleotides                                | 51727.1                                                        |
| UMPKn        | UMP kinase, nuclear                                                         | [n] : atp + ump <=> adp + udp                                  |           | Nucleotides                                | 51727.1                                                        |
| UNK2         | 2-keto-4-methylthiobutrate transamination                                   | [c] : 2kmb + gln-L + h -> glu-L + met-L                        |           | Arginine and Proline Metabolism            |                                                                |
| UNK3         | 2-keto-4-methylthiobutrate transamination                                   | [c] : 2kmb + glu-L -> akp + met-L                              |           | Arginine and Proline Metabolism            |                                                                |
| UPP3S        | uroporphyrinogen-III synthase                                               | [c] : hmbil -> h2o + uppg3                                     | 4.2.1.75  | Heme Biosynthesis                          | 7390.1                                                         |
| UPPDC1       | uroporphyrinogen decarboxylase (uroporphyrinogen III)                       | [c] : (4) h + uppg3 -> (4) co2 + cpppg3                        | 4.1.1.37  | Heme Biosynthesis                          | 7389.1                                                         |
| UPPN         | b-ureidopropionase                                                          | [c] : cala + (2) h + h2o -> ala-B + co2 + nb4                  | 3.5.1.6   | Pyrimidine Catabolism                      | 51733.1                                                        |
| URAI         | uracil transport via facilitated diffusion                                  | ura[e] <=> ura[c]                                              |           | Transport, Extracellular                   | 3177.1                                                         |
| URATEi       | urate export from cytosol                                                   | urate[e] -> urate[e]                                           |           | Transport, Extracellular                   |                                                                |
| URATEix      | urate export from peroxisome                                                | urate[x] -> urate[c]                                           |           | Transport, Peroxisomal                     |                                                                |
| URCN         | urocanase                                                                   | [c] : h2o + urcan -> 4izp                                      | 4.2.1.49  | Histidine Metabolism                       | 131669.1                                                       |
| UREAi        | Urea transport via facilitate diffusion                                     | urea[e] <=> urea[c]                                            |           | Transport, Extracellular                   | ( 6563.1 or 8170.1 or 6528.1 or 6523.1 )                       |
| UREAi5       | urea, water cotransport                                                     | h2o[e] + urea[e] <=> h2o[c] + urea[c]                          |           | Transport, Extracellular                   | 6523.1                                                         |
| UREAm        | Urea transport via diffusion                                                | urea[e] <=> urea[m]                                            |           | Urea cycle/amino group metabolism          | 366.1                                                          |
| URIDK2m      | uridylylate kinase (dUMP), mitochondrial                                    | [m] : atp + dump <=> adp + dudp                                |           | Nucleotides                                |                                                                |
| URIK1        | uridine kinase (ATP,Uridine)                                                | [c] : atp + uri -> adp + h + ump                               | 2.7.1.48  | Pyrimidine Biosynthesis                    | ( 7371.1 or 83549.1 )                                          |
| URIt         | uridine facilitated transport in cytosol                                    | uri[e] <=> uri[c]                                              |           | Transport, Extracellular                   | ( 3177.1 or 2030.1 )                                           |
| URIt4        | uridine transport in via sodium symport                                     | na1[e] + uri[e] -> na1[c] + uri[c]                             |           | Transport, Extracellular                   | ( 9154.1 or 9153.1 or 64078.1 or 9154.2 )                      |
| URIt5        | uridine transport in via sodium symport (1:2)                               | (2) na1[e] + uri[e] -> (2) na1[c] + uri[c]                     |           | Transport, Extracellular                   | 64078.1                                                        |
| URit         | uridine facilitated transport from lysosome                                 | uri[l] <=> uri[c]                                              |           | Transport, Lysosomal                       | 55315.1                                                        |
| URim         | uridine facilitated transport in mitochondria                               | uri[c] <=> uri[m]                                              |           | Transport, Mitochondrial                   | 2030.1                                                         |
| URin         | uridine transport in nucleus                                                | uri[c] <=> uri[n]                                              |           | Transport, Nuclear                         |                                                                |
| UROLACer     | uronolactonase, endoplasmic reticulum                                       | [r] : glcur + h <=> glac + h2o                                 | 3.1.1.19  | Ascorbate and Aldarate Metabolism          |                                                                |
| UTPn         | UTP diffusion in nucleus                                                    | utp[c] <=> utp[n]                                              |           | Transport, Nuclear                         |                                                                |
| VACCCPT1     | carnitine O-palmitoyltransferase                                            | [c] : crn + vacceoa -> coa + vacccrn                           | 2.3.1.21  | Carnitine shuttle                          | ( 1375.4 or 1374.1 or 126129.1 or 1375.3 or 1375.2 or 1375.1 ) |
| VACCCPT2     | carnitine transferase                                                       | [m] : coa + vacccrn -> crn + vacceoa                           |           | Carnitine shuttle                          | 1376.1                                                         |
| VACCCRNi     | transport into the mitochondria (carnitine)                                 | vacccrn[c] -> vacccrn[m]                                       |           | Carnitine shuttle                          | 788.1                                                          |
| VACCI        | fatty acid transport via diffusion                                          | vacc[e] <=> vacc[c]                                            |           | Transport, Extracellular                   |                                                                |
| VAL4         | L-valine transport in via sodium symport                                    | na1[e] + val-L[e] -> na1[c] + val-L[c]                         |           | Transport, Extracellular                   | 11254.1                                                        |
| VAL5m        | Valine reversible mitochondrial transport                                   | val-L[e] <=> val-L[m]                                          |           | Transport, Mitochondrial                   |                                                                |
| VALTA        | valine transaminase                                                         | [c] : akp + val-L <=> 3mob + glu-L                             | 2.6.1.42  | Valine, Leucine, and Isoleucine Metabolism | 586.1                                                          |
| VALTAi       | valine transaminase, mitochondrial                                          | [m] : akp + val-L <=> 3mob + glu-L                             | 2.6.1.42  | Valine, Leucine, and Isoleucine Metabolism | 587.1                                                          |
| VALec        | L-valine transport via diffusion (extracellular to cytosol)                 | val-L[e] <=> val-L[c]                                          |           | Transport, Extracellular                   | ( 8501.1 or 124935.1 )                                         |
| VD3          | Vitamin D3 formation                                                        | [c] : pd3 <=> vitd3                                            |           | Vitamin D                                  |                                                                |
| VITD2Hm      | Vitamin D-25-hydroxylase (D2)                                               | [m] : h + nadph + o2 + vitd2 -> 25hvitd2 + h2o + nadp          |           | Vitamin D                                  | 1593.1                                                         |
| VITD2i       | Vitamin D2 release                                                          | vitd2[c] -> vitd2[e]                                           |           | Transport, Extracellular                   |                                                                |
| VITD2m       | Vitamin D2 transport from mitochondria                                      | vitd2[m] <=> vitd2[c]                                          |           | Transport, Mitochondrial                   |                                                                |
| VITD3Hm      | Vitamin D-25-hydroxylase (D3)                                               | [m] : h + nadph + o2 + vitd3 -> 25hvitd3 + h2o + nadp          |           | Vitamin D                                  | 1593.1                                                         |
| VITD3i       | Vitamin D3 release                                                          | vitd3[c] -> vitd3[e]                                           |           | Transport, Extracellular                   |                                                                |
| VITD3e       | Vitamin D3 uptake                                                           | vitd3[e] -> vitd3[c]                                           |           | Transport, Extracellular                   |                                                                |
| VITD3m       | Vitamin D3 transport from mitochondria                                      | vitd3[m] -> vitd3[c]                                           |           | Transport, Mitochondrial                   |                                                                |
| VITD3m3      | Vitamin D3 transport in mitochondria                                        | vitd3[e] -> vitd3[m]                                           |           | Transport, Mitochondrial                   |                                                                |
| VLCS2p       | Very-long-chain-fatty-acid-CoA ligase                                       | [x] : atp + coa + dhcholestanate -> amp + dhcholestancoa + ppi | 6.2.1.7   | Bile Acid Biosynthesis                     | 11001.1                                                        |
| VLCS2r       | Very-long-chain-fatty-acid-CoA ligase                                       | [r] : atp + coa + dhcholestanate -> amp + dhcholestancoa + ppi | 6.2.1.7   | Bile Acid Biosynthesis                     | 11001.1                                                        |
| VLCSp        | Very-long-chain-fatty-acid-CoA ligase                                       | [x] : atp + coa + thecholstoic -> amp + cholcoar + ppi         | 6.2.1.7   | Bile Acid Biosynthesis                     | 11001.1                                                        |
| VLCSr        | Very-long-chain-fatty-acid-CoA ligase                                       | [r] : atp + coa + thecholstoic -> amp + cholcoar + ppi         | 6.2.1.7   | Bile Acid Biosynthesis                     | 11001.1                                                        |
| WHDDCAe      | xenobiotic transport                                                        | whddca[e] <=> whddca[c]                                        |           | Transport, Extracellular                   |                                                                |
| WHDDCAi      | xenobiotic transport                                                        | whddca[e] <=> whddca[i]                                        |           | Transport, Extracellular                   |                                                                |
| WHSTSTERONEi | omega hydroxy testosterone transport                                        | whststerone[e] <=> whststerone[i]                              |           | Transport, Extracellular                   |                                                                |
| WHITDCAe     | xenobiotic transport                                                        | whitdca[e] <=> whitdca[c]                                      |           | Transport, Extracellular                   |                                                                |
| XANDp        | xanthine dehydrogenase, peroxisomal                                         | [x] : h2o + nad + xan -> h + nadh + urate                      | 1.1.1.204 | Purine Catabolism                          | 7498.1                                                         |
| XANix        | xanthine diffusion in peroxisome                                            | xan[c] -> xan[x]                                               |           | Transport, Peroxisomal                     |                                                                |
| XAO2x        | xanthine oxidase                                                            | [x] : h2o + h2ax + o2 -> h2o2 + xan                            |           | Purine Catabolism                          | 7498.1                                                         |
| XAOx         | xanthine oxidase,peroxisomal                                                | [x] : h2o + o2 + xan -> h2o2 + urate                           |           | Purine Catabolism                          | 7498.1                                                         |
| XOL27OHm     | 27 hydroxy cholesterol transport                                            | xol27oh[r] <=> xol27oh[m]                                      |           | Transport, Mitochondrial                   |                                                                |
| XOL7AH2m     | lipid, flip-flop intracellular transport                                    | xol7ah2[c] <=> xol7ah2[m]                                      |           | Transport, Mitochondrial                   |                                                                |
| XOL7AH2r     | lipid, flip-flop intracellular transport                                    | xol7ah2[c] <=> xol7ah2[r]                                      |           | Transport, Endoplasmic Reticular           |                                                                |
| XOL7AONEr    | lipid, flip-flop intracellular transport                                    | xol7aone[c] <=> xol7aone[r]                                    |           | Transport, Endoplasmic Reticular           |                                                                |
| XOLDIOLONEi  | lipid, flip-flop intracellular transport                                    | xoldiolone[c] <=> xoldiolone[i]                                |           | Transport, Endoplasmic Reticular           |                                                                |
| XOLDIOLONEm  | lipid, flip-flop intracellular transport                                    | xoldiolone[m] <=> xoldiolone[r]                                |           | Transport, Endoplasmic Reticular           |                                                                |
| XOLEST2e     | cholesterol ester transporter                                               | xolest2_hs[e] <=> xolest2_hs[c]                                |           | Transport, Extracellular                   |                                                                |
| XOLESTe      | cholesterol ester transporter                                               | xolest_hs[e] <=> xolest_hs[c]                                  |           | Transport, Extracellular                   |                                                                |
| XOLTRI24e    | 24 trihydroxy cholesterol transport                                         | xoltri24[r] <=> xoltri24[c]                                    |           | Transport, Endoplasmic Reticular           |                                                                |
| XOLTRI24e    | 24 trihydroxy cholesterol transport                                         | xoltri24[c] <=> xoltri24[e]                                    |           | Transport, Extracellular                   |                                                                |
| XOLTRI25e    | 25 trihydroxy cholesterol transport                                         | xoltri25[r] <=> xoltri25[c]                                    |           | Transport, Endoplasmic Reticular           |                                                                |
| XOLTRI25e    | 25 trihydroxy cholesterol transport                                         | xoltri25[c] <=> xoltri25[e]                                    |           | Transport, Extracellular                   |                                                                |
| XOLTRI27e    | 27 trihydroxy cholesterol transport                                         | xoltri27[r] <=> xoltri27[c]                                    |           | Transport, Endoplasmic Reticular           |                                                                |
| XOLTRI27e    | 27 trihydroxy cholesterol transport                                         | xoltri27[c] <=> xoltri27[e]                                    |           | Transport, Extracellular                   |                                                                |
| XOLTRIOLm    | lipid, flip-flop intracellular transport                                    | xoltriol[c] <=> xoltriol[m]                                    |           | Transport, Mitochondrial                   |                                                                |
| XOLTRIOLr    | lipid, flip-flop intracellular transport                                    | xoltriol[c] <=> xoltriol[r]                                    |           | Transport, Endoplasmic Reticular           |                                                                |
| XSERtg       | Xyl-L-Ser (protein) transport from endoplasmic reticulum to Golgi apparatus | xser[r] -> xser[g]                                             |           | Transport, Golgi Apparatus                 |                                                                |

| Abbreviation | Reaction Name                                                | Reaction                                           | E.C. #   | Pathway                                    | Gene association       |
|--------------|--------------------------------------------------------------|----------------------------------------------------|----------|--------------------------------------------|------------------------|
| XYLK         | xylulokinase                                                 | [c] : atp + xylu-D -> adp + h + xu5p-D             | 2.7.1.17 | Pentose and Glucuronate Interconversions   | 9942.1                 |
| XYLr         | D-xylose reversible transport                                | xyl-D[e] <=> xyl-D[c]                              |          | Transport, Extracellular                   | 6515.1                 |
| XYLTD_Dr     | xylitol dehydrogenase (D-xyulose-forming)                    | [c] : nad + xylt <=> h + nadh + xylu-D             | 1.1.1.9  | Pentose and Glucuronate Interconversions   |                        |
| XYLTer       | UDP-xylose:protein xylosyltransferase, endoplasmic reticulum | [r] : Ser-Gly/Ala-X-Gly + udpxyl -> h + udp + xser | 2.4.2.26 | Chondroitin / heparan sulfate biosynthesis | ( 64131.1 or 64132.1 ) |
| XYLly        | Xylose efflux from lysosome                                  | xyl-D[l] -> xyl-D[c]                               |          | Transport, Lysosomal                       |                        |
| XYLTt        | Xylitol transport via passive diffusion                      | xyl[e] <=> xyl[c]                                  |          | Transport, Extracellular                   |                        |
| XYLUR        | xylulose reductase                                           | [c] : h + nadph + xylu-L <=> nadp + xylt           | 1.1.1.10 | Pentose and Glucuronate Interconversions   | 51181.1                |
| YVITEt       | gamma-Tocopherol (Vit. E) transport                          | yvite[e] -> yvite[c]                               |          | Transport, Extracellular                   |                        |
