# Supplementary material
Source: PubMed Central journal article supplement (PMC1794290)
Supplement: pnas_0610772104_12.pdf [file pnas_0610772104_12.pdf]

**Table 7: *H. sapiens* Recon 1 metabolites.** Alphabetized list of compartment-specific metabolites. Metabolite formula and charge were determined based on ionization state at pH 7.2 (see text for details).

| Abbreviation   | Metabolite Name                            | Synonyms                                                                                                                                                                                                                   | Formula          | Charge | Compartment           |
|----------------|--------------------------------------------|----------------------------------------------------------------------------------------------------------------------------------------------------------------------------------------------------------------------------|------------------|--------|-----------------------|
| 10thf          | 10-Formyltetrahydrofolate                  | 10-Formyl-THF                                                                                                                                                                                                              | C20H21N7O7       | -2     | Cytosol               |
| 10thf          | 10-Formyltetrahydrofolate                  | 10-Formyl-THF                                                                                                                                                                                                              | C20H21N7O7       | -2     | Extracellular         |
| 10thf          | 10-Formyltetrahydrofolate                  | 10-Formyl-THF                                                                                                                                                                                                              | C20H21N7O7       | -2     | Lysosome              |
| 10thf          | 10-Formyltetrahydrofolate                  | 10-Formyl-THF                                                                                                                                                                                                              | C20H21N7O7       | -2     | Mitochondria          |
| 10thf5glu      | 10-formyltetrahydrofolate-[Glu](5)         |                                                                                                                                                                                                                            | C40H45N11O19     | -6     | Cytosol               |
| 10thf5glu      | 10-formyltetrahydrofolate-[Glu](5)         |                                                                                                                                                                                                                            | C40H45N11O19     | -6     | Extracellular         |
| 10thf5glu      | 10-formyltetrahydrofolate-[Glu](5)         |                                                                                                                                                                                                                            | C40H45N11O19     | -6     | Lysosome              |
| 10thf5glu      | 10-formyltetrahydrofolate-[Glu](5)         |                                                                                                                                                                                                                            | C40H45N11O19     | -6     | Mitochondria          |
| 10thf6glu      | 10-formyltetrahydrofolate-[Glu](6)         |                                                                                                                                                                                                                            | C45H51N12O22     | -7     | Cytosol               |
| 10thf6glu      | 10-formyltetrahydrofolate-[Glu](6)         |                                                                                                                                                                                                                            | C45H51N12O22     | -7     | Extracellular         |
| 10thf6glu      | 10-formyltetrahydrofolate-[Glu](6)         |                                                                                                                                                                                                                            | C45H51N12O22     | -7     | Lysosome              |
| 10thf6glu      | 10-formyltetrahydrofolate-[Glu](6)         |                                                                                                                                                                                                                            | C45H51N12O22     | -7     | Mitochondria          |
| 10thf7glu      | 10-formyltetrahydrofolate-[Glu](7)         |                                                                                                                                                                                                                            | C50H57N13O25     | -8     | Cytosol               |
| 10thf7glu      | 10-formyltetrahydrofolate-[Glu](7)         |                                                                                                                                                                                                                            | C50H57N13O25     | -8     | Extracellular         |
| 10thf7glu      | 10-formyltetrahydrofolate-[Glu](7)         |                                                                                                                                                                                                                            | C50H57N13O25     | -8     | Lysosome              |
| 10thf7glu      | 10-formyltetrahydrofolate-[Glu](7)         |                                                                                                                                                                                                                            | C50H57N13O25     | -8     | Mitochondria          |
| 11-cis-retfa   | fatty acid 11-cis-retinol                  |                                                                                                                                                                                                                            | C20H29OFULLR2CO  | 0      | Cytosol               |
| 11-cis-retfa   | fatty acid 11-cis-retinol                  |                                                                                                                                                                                                                            | C20H29OFULLR2CO  | 0      | Extracellular         |
| 11docrsl       | 11-Deoxycortisol                           | 11-Deoxycortisol                                                                                                                                                                                                           | C21H30O4         | 0      | Cytosol               |
| 11docrsl       | 11-Deoxycortisol                           | 11-Deoxycortisol                                                                                                                                                                                                           | C21H30O4         | 0      | Mitochondria          |
| 11docrsl       | 11-Deoxycortisol                           | 11-Deoxycortisol                                                                                                                                                                                                           | C21H30O4         | 0      | Endoplasmic Reticulum |
| 11docrstrn     | 11-Deoxycorticosterone                     | 11-Deoxycorticosterone, 21-Hydroxy-4-pregnene-3,20-dione, Cortexone, DOC, Deoxycorticosterone                                                                                                                              | C21H30O3         | 0      | Cytosol               |
| 11docrstrn     | 11-Deoxycorticosterone                     | 11-Deoxycorticosterone, 21-Hydroxy-4-pregnene-3,20-dione, Cortexone, DOC, Deoxycorticosterone                                                                                                                              | C21H30O3         | 0      | Mitochondria          |
| 11docrstrn     | 11-Deoxycorticosterone                     | 11-Deoxycorticosterone, 21-Hydroxy-4-pregnene-3,20-dione, Cortexone, DOC, Deoxycorticosterone                                                                                                                              | C21H30O3         | 0      | Endoplasmic Reticulum |
| 12harachd      | 12 hydroxy arachidonic acid                |                                                                                                                                                                                                                            | C20H31O3         | -1     | Endoplasmic Reticulum |
| 12HPET         | 12-Hydroperoxyeicosa-5,8,10,14-tetraenoate | (5Z,8Z,10E,14Z)-(12S)-12-Hydroperoxyeicosa-5,8,10,14-tetraenoic acid, 12-HPETE, 12-Hydroperoxyeicosatetraenoate, 12-Hydroperoxyeicosatetraenoic acid, 12-Hydroperoxyeicosatetraenoate, 12-Hydroperoxyeicosatetraenoic acid | C20H31O4         | -1     | Cytosol               |
| 12ppd-R        | (R)-Propane-1,2-diol                       | (R)-1,2-Propanediol, (R)-Propylene glycol, D-1,2-propanediol                                                                                                                                                               | C3H8O2           | 0      | Cytosol               |
| 12ppd-S        | (S)-Propane-1,2-diol                       | (S)-1,2-Propanediol, (S)-Propylene glycol, L-1,2-propanediol                                                                                                                                                               | C3H8O2           | 0      | Cytosol               |
| 12RHPET        | 12R-Hydroperoxyeicosatetraenoate           | (5Z,8Z,10E,14Z)-(12R)-12-Hydroperoxyeicosa-5,8,10,14-tetraenoic acid, 12-HPETE, 12-Hydroperoxyeicosatetraenoic acid, 12-Hydroperoxyeicosatetraenoate, 12-Hydroperoxyeicosatetraenoic acid                                  | C20H31O4         | -1     | Cytosol               |
| 13-cis-oretn   | 13-cis-oxo-retinoic acid                   |                                                                                                                                                                                                                            | C20H27O3         | -1     | Cytosol               |
| 13-cis-oretn   | 13-cis-oxo-retinoic acid                   |                                                                                                                                                                                                                            | C20H27O3         | -1     | Nucleus               |
| 13-cis-retn    | 13-cis-retinoate                           |                                                                                                                                                                                                                            | C20H27O2         | -1     | Cytosol               |
| 13-cis-retn    | 13-cis-retinoate                           |                                                                                                                                                                                                                            | C20H27O2         | -1     | Nucleus               |
| 13-cis-retn    | 13-cis-retinoate                           |                                                                                                                                                                                                                            | C20H27O2         | -1     | Endoplasmic Reticulum |
| 13-cis-retnglc | 13-cis-retinoyl glucuronide                |                                                                                                                                                                                                                            | C26H35O8         | -1     | Cytosol               |
| 13-cis-retnglc | 13-cis-retinoyl glucuronide                |                                                                                                                                                                                                                            | C26H35O8         | -1     | Extracellular         |
| 13-cis-retnglc | 13-cis-retinoyl glucuronide                |                                                                                                                                                                                                                            | C26H35O8         | -1     | Endoplasmic Reticulum |
| 13dampp        | 1,3-Diaminopropane                         | 1,3-Propanediamine, Propane-1,3-diamine, Trimethylenediamine                                                                                                                                                               | C3H12N2          | 2      | Cytosol               |
| 13dpg          | 3-Phospho-D-glyceroyl phosphate            | (R)-2-Hydroxy-3-(phosphonoxy)-1-monoanhydride with phosphoric propanoic acid, 1,3-bis-phosphoglycerate, 3-Phospho-D-glyceroyl phosphate                                                                                    | C3H4O10P2        | -4     | Cytosol               |
| 15HPET         | 15-Hydroperoxyeicosatetraenoic acid        | (5Z,8Z,11Z,13E)-(15S)-15-Hydroperoxyeicosa-5,8,11,13-tetraenoate, 15-HPETE, 15-Hydroperoxyeicosatetraenoate, 15-Hydroperoxyeicosatetraenoic acid, 15-Hydroperoxyeicosatetraenoate, 15-Hydroperoxyeicosatetraenoic acid     | C20H31O4         | -1     | Cytosol               |
| 17ahprgnlone   | 17alpha-Hydroxypregnenolone                | 17alpha-Hydroxypregnenolone                                                                                                                                                                                                | C21H32O3         | 0      | Cytosol               |
| 17ahprgnlone   | 17alpha-Hydroxypregnenolone                | 17alpha-Hydroxypregnenolone                                                                                                                                                                                                | C21H32O3         | 0      | Endoplasmic Reticulum |
| 17ahprgstrn    | 17alpha-Hydroxyprogesterone                | 17alpha-Hydroxy-4-pregnene-3,20-dione, 17alpha-Hydroxy-progesterone, 17alpha-Hydroxyprogesterone, Pregn-4-ene-3,20-dione-17-ol                                                                                             | C21H30O3         | 0      | Cytosol               |
| 17ahprgstrn    | 17alpha-Hydroxyprogesterone                | 17alpha-Hydroxy-4-pregnene-3,20-dione, 17alpha-Hydroxy-progesterone, 17alpha-Hydroxyprogesterone, Pregn-4-ene-3,20-dione-17-ol                                                                                             | C21H30O3         | 0      | Endoplasmic Reticulum |
| 18harachd      | 18 hydroxy arachidonic acid                |                                                                                                                                                                                                                            | C20H31O3         | -1     | Endoplasmic Reticulum |
| 1a2425thvid2   | 1-alpha,24R,25-Trihydroxyvitamin D2        |                                                                                                                                                                                                                            | C28H44O4         | 0      | Mitochondria          |
| 1a2425thvid3   | 1-alpha,24R,25-Trihydroxyvitamin D3        |                                                                                                                                                                                                                            | C27H44O4         | 0      | Mitochondria          |
| 1a25dhvid2     | 1-alpha,25-Dihydroxyvitamin D2             |                                                                                                                                                                                                                            | C28H44O3         | 0      | Mitochondria          |
| 1a25dhvid3     | 1-alpha,25-Dihydroxyvitamin D3             | Calcitriol, Rocaltrol (TN)                                                                                                                                                                                                 | C27H44O3         | 0      | Mitochondria          |
| 1glyc_hs       | 1 acyl phosphoglycerol                     | glycerol phosphate, glycerolipid, phoso glycerol, phosphate glycerol                                                                                                                                                       | C6H13O7PFULLRCO2 | -1     | Extracellular         |
| 1mncam         | 1-Methylnicotinamide                       |                                                                                                                                                                                                                            | C7H9N2O          | 1      | Cytosol               |
| 1mncam         | 1-Methylnicotinamide                       |                                                                                                                                                                                                                            | C7H9N2O          | 1      | Extracellular         |
| 1mpyr          | 1-Methylpyrrolinium                        | 1-Methylpyrrolinium                                                                                                                                                                                                        | C5H10N           | 1      | Cytosol               |

| Abbreviation   | Metabolite Name                                                        | Synonyms                                                                                                                                                                                     | Formula        | Charge | Compartment   |
|----------------|------------------------------------------------------------------------|----------------------------------------------------------------------------------------------------------------------------------------------------------------------------------------------|----------------|--------|---------------|
| 1p2cbl         | 1-Pyrroline-2-carboxylate                                              | 1-Pyrroline-2-carboxylic acid                                                                                                                                                                | C5H6NO2        | -1     | Peroxisome    |
| 1p3h5c         | L-1-Pyrroline-3-hydroxy-5-carboxylate                                  | 3-Hydroxy-L-1-pyrroline-5-carboxylate                                                                                                                                                        | C5H6NO3        | -1     | Mitochondria  |
| 1pipdn2c       | delta1-Piperidine-2-carboxylate                                        |                                                                                                                                                                                              | C6H9NO2        | 0      | Peroxisome    |
| 1pyr5c         | 1-Pyrroline-5-carboxylate                                              | (S)-1-Pyrroline-5-carboxylate, 1-Pyrroline-5-carboxylic acid, L-1-Pyrroline-5-carboxylate                                                                                                    | C5H6NO2        | -1     | Cytosol       |
| 1pyr5c         | 1-Pyrroline-5-carboxylate                                              | (S)-1-Pyrroline-5-carboxylate, 1-Pyrroline-5-carboxylic acid, L-1-Pyrroline-5-carboxylate                                                                                                    | C5H6NO2        | -1     | Mitochondria  |
| 20ahcsterol    | 20alpha-hydroxy cholesterol                                            |                                                                                                                                                                                              | C27H46O2       | 0      | Mitochondria  |
| 23doguln       | 2,3-Dioxo-L-gulonate                                                   | 2,3-diketo-gulonic acid, 2,3-diketogulonate, DKG, diketogulonate                                                                                                                             | C6H7O7         | -1     | Cytosol       |
| 23dpg          | 2,3-Diphospho-D-glycerate                                              | 2,3-Bisphospho-D-glycerate, 3-Phospho-D-glycerate, D-Greenwald ester, DPG                                                                                                                    | C3H3O10P2      | -5     | Cytosol       |
| 2425dhvitd2    | 24R,25-Dihydroxyvitamin D2                                             |                                                                                                                                                                                              | C28H44O3       | 0      | Cytosol       |
| 2425dhvitd2    | 24R,25-Dihydroxyvitamin D2                                             |                                                                                                                                                                                              | C28H44O3       | 0      | Extracellular |
| 2425dhvitd2    | 24R,25-Dihydroxyvitamin D2                                             |                                                                                                                                                                                              | C28H44O3       | 0      | Mitochondria  |
| 2425dhvitd3    | 24R,25-Dihydroxyvitamin D3                                             |                                                                                                                                                                                              | C27H44O3       | 0      | Cytosol       |
| 2425dhvitd3    | 24R,25-Dihydroxyvitamin D3                                             |                                                                                                                                                                                              | C27H44O3       | 0      | Extracellular |
| 2425dhvitd3    | 24R,25-Dihydroxyvitamin D3                                             |                                                                                                                                                                                              | C27H44O3       | 0      | Mitochondria  |
| 24nph          | 2,4 dihydroxy nitrophenol                                              | 2 hydroxy 4 nitrophenol, 2 hydroxy, 4 hydroxy nitrobenzene                                                                                                                                   | C6H5NO4        | 0      | Cytosol       |
| 24nph          | 2,4 dihydroxy nitrophenol                                              | 2 hydroxy 4 nitrophenol, 2 hydroxy, 4 hydroxy nitrobenzene                                                                                                                                   | C6H5NO4        | 0      | Extracellular |
| 25aics         | (S)-2-[5-Amino-1-(5-phospho-D-ribose)imidazole-4-carboxamido]succinate | 1-(5'-Phosphoribosyl)-4-(N-succinocarboxamide)-5-aminimidazole, 1-(5'-Phosphoribosyl)-5-amino-4-(N-succinocarboxamide)-imidazole, 5'-Phosphoribosyl-4-(N-succinocarboxamide)-5-aminimidazole | C13H15N4O12P   | -4     | Cytosol       |
| 25hvitd2       | 25-Hydroxyvitamin D2                                                   |                                                                                                                                                                                              | C28H44O2       | 0      | Cytosol       |
| 25hvitd2       | 25-Hydroxyvitamin D2                                                   |                                                                                                                                                                                              | C28H44O2       | 0      | Extracellular |
| 25hvitd2       | 25-Hydroxyvitamin D2                                                   |                                                                                                                                                                                              | C28H44O2       | 0      | Mitochondria  |
| 25hvitd3       | 25-Hydroxyvitamin D3                                                   | Calcidiol, Calcifediol anhydrous, Calcifediol, Calderol (TN)                                                                                                                                 | C27H44O2       | 0      | Cytosol       |
| 25hvitd3       | 25-Hydroxyvitamin D3                                                   | Calcidiol, Calcifediol anhydrous, Calcifediol, Calderol (TN)                                                                                                                                 | C27H44O2       | 0      | Extracellular |
| 25hvitd3       | 25-Hydroxyvitamin D3                                                   | Calcidiol, Calcifediol anhydrous, Calcifediol, Calderol (TN)                                                                                                                                 | C27H44O2       | 0      | Mitochondria  |
| 2amac          | 2-Aminoacrylate                                                        | Dehydroalanine                                                                                                                                                                               | C3H5NO2        | 0      | Cytosol       |
| 2ameph         | (2-Aminoethyl)phosphonate                                              | 2-Aminoethylphosphonate, Clatinate                                                                                                                                                           | C2H7NO3P       | -1     | Cytosol       |
| 2aobut         | L-2-Amino-3-oxobutanoate                                               | L-2-Amino-acetoacetate                                                                                                                                                                       | C4H7NO3        | 0      | Mitochondria  |
| 2c23dh56dhoxin | 2-Carboxy-2,3-dihydro-5,6-dihydroxyindole                              | 2-Carboxy-2,3-dihydro-5,6-dihydroxyindole, Leucodopachrome                                                                                                                                   | C9H8NO4        | -1     | Cytosol       |
| 2coum          | cis-2-Hydroxy cinnamate                                                | 2-Coumarinate                                                                                                                                                                                | C9H7O3         | -1     | Cytosol       |
| 2dp6mep        | 2-Decaprenyl-6-methoxyphenol                                           |                                                                                                                                                                                              | C57H88O2       | 0      | Mitochondria  |
| 2dp6mobq       | 2-Decaprenyl-6-methoxy-1,4-benzoquinone                                |                                                                                                                                                                                              | C57H86O3       | 0      | Mitochondria  |
| 2dp6mobq_me    | 2-Decaprenyl-3-methyl-6-methoxy-1,4-benzoquinone                       |                                                                                                                                                                                              | C58H88O3       | 0      | Mitochondria  |
| 2dpmbobq       | 2-Decaprenyl-3-methyl-5-hydroxy-6-methoxy-1,4-benzoquinone             |                                                                                                                                                                                              | C58H88O4       | 0      | Mitochondria  |
| 2dr1p          | 2-Deoxy-D-ribose 1-phosphate                                           | Deoxy-ribose 1-phosphate                                                                                                                                                                     | C5H9O7P        | -2     | Cytosol       |
| 2dr5p          | 2-Deoxy-D-ribose 5-phosphate                                           |                                                                                                                                                                                              | C5H9O7P        | -2     | Cytosol       |
| 2hb            | 2-Hydroxybutyrate                                                      | 2-Hydroxybutyric acid                                                                                                                                                                        | C4H7O3         | -1     | Cytosol       |
| 2hb            | 2-Hydroxybutyrate                                                      | 2-Hydroxybutyric acid                                                                                                                                                                        | C4H7O3         | -1     | Extracellular |
| 2hyoxplac      | 2-Hydroxyphenylacetate                                                 | 2-Hydroxyphenylacetate                                                                                                                                                                       | C8H7O3         | -1     | Cytosol       |
| 2kmb           | 2-keto-4-methylthiobutyrate                                            | 2-oxo-4-(methylthio)butyrate, 4-methylthio-2-oxobutanoate                                                                                                                                    | C5H7O3S        | -1     | Cytosol       |
| 2maacoa        | 2-Methyl-3-acetoacetyl-CoA                                             | 2-Methylacetoacetyl-CoA                                                                                                                                                                      | C26H38N7O18P3S | -4     | Mitochondria  |
| 2mb2coa        | trans-2-Methylbut-2-enoyl-CoA                                          | (E)-2-Methylcrotonoyl-CoA, 2-Methylbut-2-enoyl-CoA, Tiglyl-CoA, methylcrotonoyl-CoA, methylcrotonyl-CoA, tigloyl-CoA                                                                         | C26H38N7O17P3S | -4     | Mitochondria  |
| 2mbcoa         | 2-Methylbutanoyl-CoA                                                   | 2-Methylbutyryl-CoA                                                                                                                                                                          | C26H40N7O17P3S | -4     | Mitochondria  |
| 2mcaen         | cis-2-Methylaconitate                                                  | (Z)-But-2-ene-1,2,3-tricarboxylate, cis-2-Methylaconitate                                                                                                                                    | C7H5O6         | -3     | Cytosol       |
| 2mciit         | 2-Methylcitrate                                                        |                                                                                                                                                                                              | C7H7O7         | -3     | Cytosol       |
| 2mciit         | 2-Methylcitrate                                                        |                                                                                                                                                                                              | C7H7O7         | -3     | Extracellular |
| 2mop           | 2-Methyl-3-oxopropanoate                                               | (S)-methylmalonate semialdehyde, 3-Oxo-2-methylpropanoate, Methylmalonate semialdehyde                                                                                                       | C4H5O3         | -1     | Mitochondria  |
| 2mp2coa        | 2-Methylprop-2-enoyl-CoA                                               | Methacrylyl-CoA, Methylacrylyl-CoA                                                                                                                                                           | C25H36N7O17P3S | -4     | Mitochondria  |
| 2obut          | 2-Oxobutanoate                                                         | 2-Ketobutyric acid, 2-Oxobutanoic acid, 2-Oxobutyrate, 2-Oxobutyric acid, alpha-Ketobutyrate                                                                                                 | C4H5O3         | -1     | Cytosol       |
| 2oxoadp        | 2-Oxoadipate                                                           | 2-Oxoadipic acid                                                                                                                                                                             | C6H6O5         | -2     | Cytosol       |
| 2oxoadp        | 2-Oxoadipate                                                           | 2-Oxoadipic acid                                                                                                                                                                             | C6H6O5         | -2     | Mitochondria  |
| 2pg            | D-Glycerate 2-phosphate                                                | 2-Phospho-D-glycerate, 2-phosphoglyceric acid                                                                                                                                                | C3H4O7P        | -3     | Cytosol       |
| 2pglyc         | 2-Phosphoglycolate                                                     | 2-phosphoglycolic acid, Phosphoglycolic acid                                                                                                                                                 | C2H2O6P        | -3     | Cytosol       |
| 34dhcimm       | 3,4-Dihydroxy-trans-cinnamate                                          | trans-Caffeate                                                                                                                                                                               | C9H7O4         | -1     | Cytosol       |
| 34dhmald       | 3,4-Dihydroxymandelaldehyde                                            |                                                                                                                                                                                              | C8H8O4         | 0      | Cytosol       |
| 34dhoxmand     | 3,4-Dihydroxymandelate                                                 |                                                                                                                                                                                              | C8H7O5         | -1     | Cytosol       |
| 34dhoxpeg      | 3,4-Dihydroxyphenylethyleneglycol                                      | 3,4-Dihydroxyphenylethyleneglycol                                                                                                                                                            | C8H10O4        | 0      | Cytosol       |
| 34dhoxpeg      | 3,4-Dihydroxyphenylethyleneglycol                                      | 3,4-Dihydroxyphenylethyleneglycol                                                                                                                                                            | C8H10O4        | 0      | Extracellular |
| 34dhpac        | 3,4-Dihydroxyphenylacetaldehyde                                        | 3,4-Dihydroxyphenylacetaldehyde, Protocatechuatealdehyde                                                                                                                                     | C8H8O3         | 0      | Cytosol       |

| Abbreviation | Metabolite Name                                  | Synonyms                                                                                                                                                                            | Formula        | Charge | Compartment     |
|--------------|--------------------------------------------------|-------------------------------------------------------------------------------------------------------------------------------------------------------------------------------------|----------------|--------|-----------------|
| 34dhpa       | 3,4-Dihydroxyphenylacetate                       | 3,4-Dihydroxyphenyl acetate, 3,4-Dihydroxyphenyl acetic acid, 3,4-Dihydroxyphenylacetic acid, Homoprotocatechuate                                                                   | C8H7O4         | -1     | Cytosol         |
| 34dhphe      | 3,4-Dihydroxy-L-phenylalanine                    | 3-Hydroxy-L-tyrosine, Dihydroxy-L-phenylalanine, Hydroxy-L-tyrosine, L-Dopa, L-beta-(3,4-Dihydroxyphenyl)alanine, Levodopa                                                          | C9H11NO4       | 0      | Cytosol         |
| 34dhphe      | 3,4-Dihydroxy-L-phenylalanine                    | 3-Hydroxy-L-tyrosine, Dihydroxy-L-phenylalanine, Hydroxy-L-tyrosine, L-Dopa, L-beta-(3,4-Dihydroxyphenyl)alanine, Levodopa                                                          | C9H11NO4       | 0      | Extracellular   |
| 34hpl        | 3-(4-Hydroxyphenyl)lactate                       | 4-Hydroxyphenyllactate, p-Hydroxyphenyllactate                                                                                                                                      | C9H9O4         | -1     | Mitochondria    |
| 34hpp        | 3-(4-Hydroxyphenyl)pyruvate                      | 4-Hydroxyphenylpyruvate, p-Hydroxyphenylpyruvic acid                                                                                                                                | C9H7O4         | -1     | Cytosol         |
| 34hpp        | 3-(4-Hydroxyphenyl)pyruvate                      | 4-Hydroxyphenylpyruvate, p-Hydroxyphenylpyruvic acid                                                                                                                                | C9H7O4         | -1     | Mitochondria    |
| 35cgmpp      | 3',5'-Cyclic GMP                                 | Cyclic GMP, Guanosine 3',5'-cyclic monophosphate, Guanosine 3',5'-cyclic phosphate                                                                                                  | C10H11NSO7P    | -1     | Cytosol         |
| 35cgmpp      | 3',5'-Cyclic GMP                                 | Cyclic GMP, Guanosine 3',5'-cyclic monophosphate, Guanosine 3',5'-cyclic phosphate                                                                                                  | C10H11NSO7P    | -1     | Extracellular   |
| 35cgmpp      | 3',5'-Cyclic GMP                                 | Cyclic GMP, Guanosine 3',5'-cyclic monophosphate, Guanosine 3',5'-cyclic phosphate                                                                                                  | C10H11NSO7P    | -1     | Golgi Apparatus |
| 35cgmpp      | 3',5'-Cyclic GMP                                 | Cyclic GMP, Guanosine 3',5'-cyclic monophosphate, Guanosine 3',5'-cyclic phosphate                                                                                                  | C10H11NSO7P    | -1     | Nucleus         |
| 35dtyr       | 3,5-Diiodo-L-tyrosine                            | 3,5-Diiodotyrosine, L-Diiodotyrosine                                                                                                                                                | C9H9I2NO3      | 0      | Cytosol         |
| 3aib         | L-3-Amino-isobutanoate                           | (S)-3-Amino-isobutanoate, (S)-3-Amino-isobutyrate, L-3-Amino-isobutyrate, b-Aminoisobutyrate                                                                                        | C4H9NO2        | 0      | Cytosol         |
| 3aib         | L-3-Amino-isobutanoate                           | (S)-3-Amino-isobutanoate, (S)-3-Amino-isobutyrate, L-3-Amino-isobutyrate, b-Aminoisobutyrate                                                                                        | C4H9NO2        | 0      | Extracellular   |
| 3aib         | L-3-Amino-isobutanoate                           | (S)-3-Amino-isobutanoate, (S)-3-Amino-isobutyrate, L-3-Amino-isobutyrate, b-Aminoisobutyrate                                                                                        | C4H9NO2        | 0      | Mitochondria    |
| 3aib-D       | D-3-Amino-isobutanoate                           | D-3-Amino-isobutanoate                                                                                                                                                              | C4H9NO2        | 0      | Cytosol         |
| 3aib-D       | D-3-Amino-isobutanoate                           | D-3-Amino-isobutanoate                                                                                                                                                              | C4H9NO2        | 0      | Extracellular   |
| 3aib-D       | D-3-Amino-isobutanoate                           | D-3-Amino-isobutanoate                                                                                                                                                              | C4H9NO2        | 0      | Mitochondria    |
| 3amp         | 3'-AMP                                           | 3'-Adenosine monophosphate, 3'-Adenylic acid, AMP 3'-phosphate, Adenosine 3'-phosphate, Adenosine-3'-monophosphate                                                                  | C10H12NSO7P    | -2     | Lysosome        |
| 3dhguln      | 3-Dehydro-L-gulonate                             | 3-keto-L-gulonate                                                                                                                                                                   | C6H9O7         | -1     | Cytosol         |
| 3dpthb       | 3-Decaprenyl-4,5-dihydroxybenzoate               |                                                                                                                                                                                     | C57H85O4       | -1     | Mitochondria    |
| 3dpthb_me    | 3-Decaprenyl-4-hydroxy-5-methoxybenzoate         |                                                                                                                                                                                     | C58H87O4       | -1     | Mitochondria    |
| 3dpthb       | 3-Decaprenyl-4-hydroxybenzoate                   |                                                                                                                                                                                     | C57H85O3       | -1     | Mitochondria    |
| 3dsphgn      | 3-Dehydrospinganine                              | 3-Dehydro-D-sphinganine                                                                                                                                                             | C18H38NO2      | 1      | Cytosol         |
| 3h26dm5coa   | 3-Hydroxy-2,6-dimethyl-5-methylene-heptanoyl-CoA |                                                                                                                                                                                     | C31H48N7O18P3S | -4     | Mitochondria    |
| 3h26dm5coa   | 3-Hydroxy-2,6-dimethyl-5-methylene-heptanoyl-CoA |                                                                                                                                                                                     | C31H48N7O18P3S | -4     | Peroxisome      |
| 3hanthr      | 3-Hydroxyanthranilate                            | 3-Hydroxyanthranilic acid                                                                                                                                                           | C7H7NO3        | 0      | Cytosol         |
| 3hbcoa       | (S)-3-Hydroxybutanoyl-CoA                        | (S)-3-Hydroxybutyryl-CoA                                                                                                                                                            | C25H38N7O18P3S | -4     | Mitochondria    |
| 3hbcoa       | (S)-3-Hydroxybutanoyl-CoA                        | (S)-3-Hydroxybutyryl-CoA                                                                                                                                                            | C25H38N7O18P3S | -4     | Peroxisome      |
| 3hbcoa-R     | (R)-3-Hydroxybutanoyl-CoA                        | (3R)-3-Hydroxybutanoyl-CoA                                                                                                                                                          | C25H38N7O18P3S | -4     | Mitochondria    |
| 3hibutcoa    | (S)-3-Hydroxyisobutyryl-CoA                      |                                                                                                                                                                                     | C25H38N7O18P3S | -4     | Mitochondria    |
| 3hmbcoa      | (S)-3-Hydroxy-2-methylbutyryl-CoA                | (2S,3S)-3-Hydroxy-2-methylbutanoyl-CoA                                                                                                                                              | C26H40N7O18P3S | -4     | Mitochondria    |
| 3hmp         | 3-Hydroxy-2-methylpropanoate                     | (S)-3-hydroxyisobutyrate, 3-Hydroxyisobutyrate, 3-Hydroxyisobutyric acid                                                                                                            | C4H7O3         | -1     | Mitochondria    |
| 3hpcoa       | 3-Hydroxypropionyl-CoA                           | 3-Hydroxyisobutyryl coenzyme A, 3-Hydroxyisobutyryl-CoA, 3-Hydroxypropanoyl coenzyme A, 3-Hydroxypropanoyl-CoA, 3-Hydroxypropionyl coenzyme A                                       | C24H36N7O18P3S | -4     | Cytosol         |
| 3hpcoa       | 3-Hydroxypropionyl-CoA                           | 3-Hydroxyisobutyryl coenzyme A, 3-Hydroxyisobutyryl-CoA, 3-Hydroxypropanoyl coenzyme A, 3-Hydroxypropanoyl-CoA, 3-Hydroxypropionyl coenzyme A                                       | C24H36N7O18P3S | -4     | Mitochondria    |
| 3hpcoa       | 3-Hydroxypropionyl-CoA                           | 3-Hydroxyisobutyryl coenzyme A, 3-Hydroxyisobutyryl-CoA, 3-Hydroxypropanoyl coenzyme A, 3-Hydroxypropanoyl-CoA, 3-Hydroxypropionyl coenzyme A                                       | C24H36N7O18P3S | -4     | Peroxisome      |
| 3hpp         | 3-Hydroxypropanoate                              | 3-Hydropropionic acid, 3-Hydroxyisobutyrate, 3-Hydroxyisobutyric acid, 3-Hydroxypropanoic acid, 3-Hydroxypropionate, 3-Hydroxypropionate, 3-Hydroxypropionic acid, Hydracrylic acid | C3H5O3         | -1     | Cytosol         |
| 3hlmelys     | 3-Hydroxy-N6,N6,N6-trimethyl-L-lysine            |                                                                                                                                                                                     | C9H20N2O3      | 0      | Cytosol         |
| 3hlmelys     | 3-Hydroxy-N6,N6,N6-trimethyl-L-lysine            |                                                                                                                                                                                     | C9H20N2O3      | 0      | Mitochondria    |
| 3hxyknam     | 3-Hydroxykynurenamine                            |                                                                                                                                                                                     | C9H13N2O2      | 1      | Cytosol         |
| 3ityr-L      | 3-Iodo-L-tyrosine                                | 3-Iodo-L-tyrosine                                                                                                                                                                   | C9H10INO3      | 0      | Cytosol         |
| 3m4hpga      | 3-Methoxy-4-hydroxyphenylglycolaldehyde          |                                                                                                                                                                                     | C9H10O4        | 0      | Cytosol         |

| Abbreviation | Metabolite Name                                | Synonyms                                                                                                                                                            | Formula         | Charge | Compartment           |
|--------------|------------------------------------------------|---------------------------------------------------------------------------------------------------------------------------------------------------------------------|-----------------|--------|-----------------------|
| 3mb2coa      | 3-Methylbut-2-enoyl-CoA                        | 3-Methylcrotonoyl-CoA                                                                                                                                               | C26H38N7O17P3S  | -4     | Mitochondria          |
| 3mgcoa       | 3-Methylglutaconyl-CoA                         | trans-3-Methylglutaconyl-CoA                                                                                                                                        | C27H37N7O19P3S  | -5     | Mitochondria          |
| 3mlda        | 3-Methylimidazoleacetic acid                   | 1-Methyl-4-imidazoleacetic acid, Tele-methylimidazoleacetic acid                                                                                                    | C6H7N2O2        | -1     | Cytosol               |
| 3mlda        | 3-Methylimidazoleacetic acid                   | 1-Methyl-4-imidazoleacetic acid, Tele-methylimidazoleacetic acid                                                                                                    | C6H7N2O2        | -1     | Extracellular         |
| 3mldz        | 3-Methylimidazole acetaldehyde                 | 1-Methylimidazole-4-acetaldehyde, Methylimidazoleacetaldehyde                                                                                                       | C6H8N2O         | 0      | Cytosol               |
| 3mob         | 3-Methyl-2-oxobutanoate                        | 2-Keto-3-methylbutyric acid, 2-Ketovaline, 2-Oxo-methylbutanoate, 2-Oxoisopentanoate, 2-Oxoisovalerate, 3-Methyl-2-oxobutyric acid, alpha-Ketovaline                | C5H7O3          | -1     | Cytosol               |
| 3mob         | 3-Methyl-2-oxobutanoate                        | 2-Keto-3-methylbutyric acid, 2-Ketovaline, 2-Oxo-methylbutanoate, 2-Oxoisopentanoate, 2-Oxoisovalerate, 3-Methyl-2-oxobutyric acid, alpha-Ketovaline                | C5H7O3          | -1     | Mitochondria          |
| 3mop         | (S)-3-Methyl-2-oxopentanoate                   | (R)-2-oxo-3-methylpentanoate, (S)-2-oxo-3-methylpentanoate, 2-oxo-3-methylpentanoate, alpha-keto-beta-methylvalerate, alpha-oxo-beta-methylvalerate, ketoisoleucine | C6H9O3          | -1     | Cytosol               |
| 3mop         | (S)-3-Methyl-2-oxopentanoate                   | (R)-2-oxo-3-methylpentanoate, (S)-2-oxo-3-methylpentanoate, 2-oxo-3-methylpentanoate, alpha-keto-beta-methylvalerate, alpha-oxo-beta-methylvalerate, ketoisoleucine | C6H9O3          | -1     | Mitochondria          |
| 3mox4hoxm    | 3-Methoxy-4-hydroxymandelate                   | Vanillylmandelic acid                                                                                                                                               | C9H9O5          | -1     | Cytosol               |
| 3mox4hpac    | 3-Methoxy-4-hydroxyphenylacetaldehyde          |                                                                                                                                                                     | C9H10O3         | 0      | Cytosol               |
| 3moxtyr      | 3-Methoxytyramine                              |                                                                                                                                                                     | C9H14NO2        | 1      | Cytosol               |
| 3odcoa       | 3-Oxodecanoyl-CoA                              |                                                                                                                                                                     | C31H48N7O18P3S  | -4     | Peroxisome            |
| 3oddcoa      | 3-Oxododecanoyl-CoA                            |                                                                                                                                                                     | C33H52N7O18P3S  | -4     | Peroxisome            |
| 3ohdcoa      | 3-Oxohexadecanoyl-CoA                          |                                                                                                                                                                     | C37H60N7O18P3S  | -4     | Peroxisome            |
| 3ohodcoa     | 3-Oxooctadecanoyl-CoA                          |                                                                                                                                                                     | C39H64N7O18P3S  | -4     | Peroxisome            |
| 3ohxcoa      | 3-Oxohexacosyl-CoA                             |                                                                                                                                                                     | C47H80N7O18P3S  | -4     | Peroxisome            |
| 3otdcoa      | 3-Oxotetradecanoyl-CoA                         |                                                                                                                                                                     | C35H56N7O18P3S  | -4     | Peroxisome            |
| 3padsel      | 3'-Phosphoadenylylselenate                     | 3'-Phosphoadenosine-5'-phosphoselenate                                                                                                                              | C10H11N5O13P2Se | -4     | Cytosol               |
| 3pg          | 3-Phospho-D-glycerate                          | 3-Phosphoglycerate, 3-phosphoglyceric acid, D-Glycerate 3-phosphate                                                                                                 | C3H4O7P         | -3     | Cytosol               |
| 3php         | 3-Phosphohydroxypyruvate                       | 3-Phosphohydroxypyruvic acid, 3-Phosphonoxyypyruvate, 3-Phosphonoxyypyruvic acid                                                                                    | C3H2O7P         | -3     | Cytosol               |
| 3sala        | 3-Sulfino-L-alanine                            | 3-Sulfinoalanine, 3-sulphino-L-alanine, L-Cysteine sulfonic acid, L-Cysteinesulfonic acid                                                                           | C3H5NO4S        | -2     | Cytosol               |
| 3sala        | 3-Sulfino-L-alanine                            | 3-Sulfinoalanine, 3-sulphino-L-alanine, L-Cysteine sulfonic acid, L-Cysteinesulfonic acid                                                                           | C3H5NO4S        | -2     | Mitochondria          |
| 3snpyr       | 3-Sulfinyopyruvate                             | 3-Sulfinyopyruvate, 3-Sulfinylpyruvate                                                                                                                              | C3H2O5S         | -2     | Cytosol               |
| 3snpyr       | 3-Sulfinyopyruvate                             | 3-Sulfinyopyruvate, 3-Sulfinylpyruvate                                                                                                                              | C3H2O5S         | -2     | Mitochondria          |
| 3spxr        | 3-Sulfoxyruvate                                |                                                                                                                                                                     | C3H2O6S         | -2     | Cytosol               |
| 3spxr        | 3-Sulfoxyruvate                                |                                                                                                                                                                     | C3H2O6S         | -2     | Mitochondria          |
| 3uib         | 3-Ureidoisobutyrate                            |                                                                                                                                                                     | C5H9N2O3        | -1     | Cytosol               |
| 42A3HP24DB   | 4-(2-Amino-3-hydroxyphenyl)-2,4-dioxobutanoate |                                                                                                                                                                     | C10H8NO5        | -1     | Cytosol               |
| 44mctr       | 4,4-dimethylcholesta-8,14,24-trienol           | 4,4'-dimethyl cholesta-8,14,24-triene-3-beta-ol, delta-8-14-24-dimethylsterol                                                                                       | C29H46O         | 0      | Cytosol               |
| 44mctr       | 4,4-dimethylcholesta-8,14,24-trienol           | 4,4'-dimethyl cholesta-8,14,24-triene-3-beta-ol, delta-8-14-24-dimethylsterol                                                                                       | C29H46O         | 0      | Endoplasmic Reticulum |
| 44mzym       | 4,4-dimethylzymosterol                         | 14-Desmethylanosterol, 4,4-dimethyl-5alpha-cholesta-8,14,24-trien-3beta-ol                                                                                          | C29H48O         | 0      | Endoplasmic Reticulum |
| 46dhoquin    | 4,6-Dihydroxyquinoline                         | Quinoline-4,6-diol                                                                                                                                                  | C9H7NO2         | 0      | Cytosol               |
| 48dhoquin    | 4,8-Dihydroxyquinoline                         | Quinoline-4,8-diol                                                                                                                                                  | C9H7NO2         | 0      | Cytosol               |
| 4aabtn       | 4-Acetamidobutanoate                           |                                                                                                                                                                     | C6H10NO3        | -1     | Cytosol               |
| 4aabtn       | 4-Acetamidobutanoate                           |                                                                                                                                                                     | C6H10NO3        | -1     | Mitochondria          |
| 4abut        | 4-Aminobutanoate                               | (4-Aminobutyl)guanidine, 4-Aminobutanoic acid, 4-Aminobutylate, 4-Aminobutyric acid, GABA, gamma-Aminobutyric acid                                                  | C4H9NO2         | 0      | Cytosol               |
| 4abut        | 4-Aminobutanoate                               | (4-Aminobutyl)guanidine, 4-Aminobutanoic acid, 4-Aminobutylate, 4-Aminobutyric acid, GABA, gamma-Aminobutyric acid                                                  | C4H9NO2         | 0      | Extracellular         |
| 4abut        | 4-Aminobutanoate                               | (4-Aminobutyl)guanidine, 4-Aminobutanoic acid, 4-Aminobutylate, 4-Aminobutyric acid, GABA, gamma-Aminobutyric acid                                                  | C4H9NO2         | 0      | Lysosome              |
| 4abut        | 4-Aminobutanoate                               | (4-Aminobutyl)guanidine, 4-Aminobutanoic acid, 4-Aminobutylate, 4-Aminobutyric acid, GABA, gamma-Aminobutyric acid                                                  | C4H9NO2         | 0      | Mitochondria          |
| 4abtn        | 4-Aminobutanol                                 | 4-Aminobutylaldehyde, 4-amino-Butylaldehyde, gamma-aminobutanol                                                                                                     | C4H10NO         | 1      | Cytosol               |
| 4aphdob      | 4-(2-Aminophenyl)-2,4-dioxobutanoate           |                                                                                                                                                                     | C10H8NO4        | -1     | Cytosol               |
| 4fumacac     | 4-Fumarylacetoacetate                          | 4-Fumarylacetoacetic acid, Fumarylacetoacetate                                                                                                                      | C8H6O6          | -2     | Cytosol               |
| 4h2ogl       | 4-Hydroxy-2-oxoglutarate                       | 4-Hydroxy-2-oxoglutaric acid, D-4-Hydroxy-2-oxoglutarate                                                                                                            | C5H4O6          | -2     | Cytosol               |
| 4h2ogl       | 4-Hydroxy-2-oxoglutarate                       | 4-Hydroxy-2-oxoglutaric acid, D-4-Hydroxy-2-oxoglutarate                                                                                                            | C5H4O6          | -2     | Mitochondria          |

| Abbreviation     | Metabolite Name                                       | Synonyms                                                                                                                                                                                                                                                                                                      | Formula        | Charge | Compartment           |
|------------------|-------------------------------------------------------|---------------------------------------------------------------------------------------------------------------------------------------------------------------------------------------------------------------------------------------------------------------------------------------------------------------|----------------|--------|-----------------------|
| 4hbz             | 4-Hydroxybenzoate                                     | 4-Hydroxybenzoic acid, Hydroxybenzenecarboxylic acid, Hydroxybenzoic acid                                                                                                                                                                                                                                     | C7H5O3         | -1     | Mitochondria          |
| 4hbzcoa          | 4-hydroxybenoyl-CoA                                   |                                                                                                                                                                                                                                                                                                               | C28H36N7O18P3S | -4     | Mitochondria          |
| 4hdebrisoquine   | 4 hydroxy debrisoquine                                |                                                                                                                                                                                                                                                                                                               | C10H14N3O      | 1      | Cytosol               |
| 4hdebrisoquine   | 4 hydroxy debrisoquine                                |                                                                                                                                                                                                                                                                                                               | C10H14N3O      | 1      | Extracellular         |
| 4hglsa           | L-4-Hydroxyglutamate semialdehyde                     |                                                                                                                                                                                                                                                                                                               | C5H9NO4        | 0      | Mitochondria          |
| 4hoxpacd         | 4-Hydroxyphenylacetaldehyde                           | 2-(4-Hydroxyphenyl)acetaldehyde                                                                                                                                                                                                                                                                               | C8H8O2         | 0      | Cytosol               |
| 4hphac           | 4-Hydroxyphenylacetate                                | 4-Hydroxyphenylacetic acid                                                                                                                                                                                                                                                                                    | C8H7O3         | -1     | Cytosol               |
| 4hphac           | 4-Hydroxyphenylacetate                                | 4-Hydroxyphenylacetic acid                                                                                                                                                                                                                                                                                    | C8H7O3         | -1     | Extracellular         |
| 4hpro-LT         | trans-4-Hydroxy-L-proline                             |                                                                                                                                                                                                                                                                                                               | C5H9NO3        | 0      | Mitochondria          |
| 4hpro-LT         | trans-4-Hydroxy-L-proline                             |                                                                                                                                                                                                                                                                                                               | C5H9NO3        | 0      | Endoplasmic Reticulum |
| 4izp             | 4-Imidazolone-5-propanoate                            | 4,5-Dihydro-4-oxo-5-imidazolepropanoate, 4-Imidazolone-5-propionic acid                                                                                                                                                                                                                                       | C6H7N2O3       | -1     | Cytosol               |
| 4mlacac          | 4-Maleylacetate                                       |                                                                                                                                                                                                                                                                                                               | C8H6O6         | -2     | Cytosol               |
| 4mop             | 4-Methyl-2-oxopentanoate                              | 2-Oxoisocaproate, alpha-ketoisocaproate                                                                                                                                                                                                                                                                       | C6H9O3         | -1     | Cytosol               |
| 4mop             | 4-Methyl-2-oxopentanoate                              | 2-Oxoisocaproate, alpha-ketoisocaproate                                                                                                                                                                                                                                                                       | C6H9O3         | -1     | Mitochondria          |
| 4mptnl           | 4-Methylpentanal                                      | 4-Methylpentanal                                                                                                                                                                                                                                                                                              | C6H12O         | 0      | Mitochondria          |
| 4mtolbutamide    | 4 hydroxy tolbutamide                                 | 4 methyl hydroxy tolbutamide                                                                                                                                                                                                                                                                                  | C12H18N2O4S    | 0      | Cytosol               |
| 4mtolbutamide    | 4 hydroxy tolbutamide                                 | 4 methyl hydroxy tolbutamide                                                                                                                                                                                                                                                                                  | C12H18N2O4S    | 0      | Extracellular         |
| 4mzym_int1       | 4-Methylzymosterol intermediate 1                     |                                                                                                                                                                                                                                                                                                               | C29H46O3       | 0      | Endoplasmic Reticulum |
| 4mzym_int2       | 4-Methylzymosterol intermediate 2                     |                                                                                                                                                                                                                                                                                                               | C28H44O        | 0      | Endoplasmic Reticulum |
| 4nph             | 4-Nitrophenol                                         | 4-Hydroxynitrobenzene, Niphen, PNP, p-Nitrophenol                                                                                                                                                                                                                                                             | C6H5NO3        | 0      | Cytosol               |
| 4nph             | 4-Nitrophenol                                         | 4-Hydroxynitrobenzene, Niphen, PNP, p-Nitrophenol                                                                                                                                                                                                                                                             | C6H5NO3        | 0      | Extracellular         |
| 4nphsf           | 4-Nitrophenyl sulfate                                 | IUPAC Name: 1-nitro-4-sulfooxy-benzene, Sulfuric acid mono(4-nitrophenyl) ester, p-Nitrophenol sulfate, p-Nitrophenyl sulfate                                                                                                                                                                                 | C6H4NO6S       | -1     | Cytosol               |
| 4nphsf           | 4-Nitrophenyl sulfate                                 | IUPAC Name: 1-nitro-4-sulfooxy-benzene, Sulfuric acid mono(4-nitrophenyl) ester, p-Nitrophenol sulfate, p-Nitrophenyl sulfate                                                                                                                                                                                 | C6H4NO6S       | -1     | Extracellular         |
| 4ppan            | D-4'-Phosphopantothenate                              | (R)-4'-Phosphopantothenate                                                                                                                                                                                                                                                                                    | C9H15NO8P      | -3     | Cytosol               |
| 4ppan            | D-4'-Phosphopantothenate                              | (R)-4'-Phosphopantothenate                                                                                                                                                                                                                                                                                    | C9H15NO8P      | -3     | Mitochondria          |
| 4ppcys           | N-((R)-4-Phosphopantothenoyl)-L-cysteine              | (R)-4'-Phosphopantothenoyl-L-cysteine                                                                                                                                                                                                                                                                         | C12H20N2O9PS   | -3     | Cytosol               |
| 4pyrdx           | 4-Pyridoxate                                          | 4-Pyridoxic acid                                                                                                                                                                                                                                                                                              | C8H9NO4        | 0      | Cytosol               |
| 4pyrdx           | 4-Pyridoxate                                          | 4-Pyridoxic acid                                                                                                                                                                                                                                                                                              | C8H9NO4        | 0      | Extracellular         |
| 4meabut          | 4-Trimethylammoniumbutanal                            |                                                                                                                                                                                                                                                                                                               | C7H16NO        | 1      | Cytosol               |
| 4meabut          | 4-Trimethylammoniumbutanal                            |                                                                                                                                                                                                                                                                                                               | C7H16NO        | 1      | Mitochondria          |
| 4meabutn         | 4-Trimethylammoniumbutanoate                          |                                                                                                                                                                                                                                                                                                               | C7H15NO2       | 0      | Cytosol               |
| 56dhindlcrbxlt   | 5,6-Dihydroxyindole-2-carboxylate                     |                                                                                                                                                                                                                                                                                                               | C9H6NO4        | -1     | Cytosol               |
| 56dthm           | 5,6-Dihydrothymine                                    | 5,6-Dihydro-5-methyluracil, Dihydrothymine                                                                                                                                                                                                                                                                    | C5H8N2O2       | 0      | Cytosol               |
| 56dura           | 5,6-dihydrouracil                                     | 2, 3H)-Pyrimidinedione, 4(1H, 4-dihydroxy)pyrimidine, 5, 6-Dihydro-2, Dihydrouracil, Hydrouracil, dihydro-, dihydrouracil                                                                                                                                                                                     | C4H6N2O2       | 0      | Cytosol               |
| 5a2opntn         | 5-Amino-2-oxopentanoate                               | 2-Oxo-5-amino-pentanoate, 2-Oxo-5-aminopentanoate, alpha-Keto-delta-aminopentanoate                                                                                                                                                                                                                           | C5H9NO3        | 0      | Peroxisome            |
| 5adtststerone    | 5alpha-Dihydrotestosterone                            | 17beta-Hydroxy-5alpha-androstan-3-one, 17beta-Hydroxyandrost-3-one, 5alpha-Dihydrotestosterone, Androstanolone                                                                                                                                                                                                | C19H30O2       | 0      | Cytosol               |
| 5adtststerone    | 5alpha-Dihydrotestosterone                            | 17beta-Hydroxy-5alpha-androstan-3-one, 17beta-Hydroxyandrost-3-one, 5alpha-Dihydrotestosterone, Androstanolone                                                                                                                                                                                                | C19H30O2       | 0      | Extracellular         |
| 5adtststerone    | 5alpha-Dihydrotestosterone                            | 17beta-Hydroxy-5alpha-androstan-3-one, 17beta-Hydroxyandrost-3-one, 5alpha-Dihydrotestosterone, Androstanolone                                                                                                                                                                                                | C19H30O2       | 0      | Endoplasmic Reticulum |
| 5adtststeroneglc | 5alpha-Dihydrotestosterone glucuronide                |                                                                                                                                                                                                                                                                                                               | C25H38O8       | 0      | Cytosol               |
| 5adtststeroneglc | 5alpha-Dihydrotestosterone glucuronide                |                                                                                                                                                                                                                                                                                                               | C25H38O8       | 0      | Extracellular         |
| 5adtststeroneglc | 5alpha-Dihydrotestosterone glucuronide                |                                                                                                                                                                                                                                                                                                               | C25H38O8       | 0      | Endoplasmic Reticulum |
| 5adtststerones   | 5alpha-Dihydrotestosterone sulfate                    |                                                                                                                                                                                                                                                                                                               | C19H29O5S      | -1     | Cytosol               |
| 5adtststerones   | 5alpha-Dihydrotestosterone sulfate                    |                                                                                                                                                                                                                                                                                                               | C19H29O5S      | -1     | Extracellular         |
| 5aizc            | 5-amino-1-(5-phospho-D-ribose)imidazole-4-carboxylate | 1-(5'-Phosphoribosyl)-4-carboxy-5-aminoimidazole, 1-(5'-Phosphoribosyl)-5-amino-4-carboxyimidazole, 1-(5'-Phosphoribosyl)-5-amino-4-imidazolecarboxylate, 1-(5-Phospho-D-ribose)-5-amino-4-imidazolecarboxylate, 5'-Phosphoribosyl-carboxy-5-aminoimidazole, 5'-Phosphoribosyl-5-amino-4-imidazolecarboxylate | C9H11N3O9P     | -3     | Cytosol               |
| 5aop             | 5-Amino-4-oxopentanoate                               | 5-Amino-4-oxovaleric acid, 5-Aminolevulinat                                                                                                                                                                                                                                                                   | C5H9NO3        | 0      | Cytosol               |
| 5aop             | 5-Amino-4-oxopentanoate                               | 5-Amino-4-oxovaleric acid, 5-Aminolevulinat                                                                                                                                                                                                                                                                   | C5H9NO3        | 0      | Mitochondria          |
| 5dhf             | pentaglutamyl folate (DHF)                            |                                                                                                                                                                                                                                                                                                               | C39H43N11O18   | -6     | Cytosol               |
| 5dhf             | pentaglutamyl folate (DHF)                            |                                                                                                                                                                                                                                                                                                               | C39H43N11O18   | -6     | Extracellular         |
| 5dhf             | pentaglutamyl folate (DHF)                            |                                                                                                                                                                                                                                                                                                               | C39H43N11O18   | -6     | Lysosome              |
| 5dhf             | pentaglutamyl folate (DHF)                            |                                                                                                                                                                                                                                                                                                               | C39H43N11O18   | -6     | Mitochondria          |
| 5dpmev           | (R)-5-Diphosphomevalonate                             |                                                                                                                                                                                                                                                                                                               | C6H10O10P2     | -4     | Peroxisome            |
| 5forthf          | 5-Formiminotetrahydrofolate                           |                                                                                                                                                                                                                                                                                                               | C20H22N8O6     | -2     | Cytosol               |
| 5fthf            | 5-Formyltetrahydrofolate                              | Folic acid, L(-)-5-Formyl-5,6,7,8-tetrahydrofolic acid                                                                                                                                                                                                                                                        | C20H21N7O7     | -2     | Cytosol               |

| Abbreviation | Metabolite Name                                     | Synonyms                                                                                                                   | Formula         | Charge | Compartment           |
|--------------|-----------------------------------------------------|----------------------------------------------------------------------------------------------------------------------------|-----------------|--------|-----------------------|
| 5thf         | 5-Formyltetrahydrofolate                            | Folinic acid, L(-)-5-Formyl-5,6,7,8-tetrahydrofolic acid                                                                   | C20H21N7O7      | -2     | Extracellular         |
| 5g2oxpt      | 5-Guanidino-2-oxopentanoate                         | 2-Oxo-5-guanidino-pentanoate, 2-Oxo-5-guanidinopentanoate, 5-Guanidino-2-oxo-pentanoate                                    | C6H11N3O3       | 0      | Peroxisome            |
| 5homeprazole | 5 hydroxy omeprazole                                |                                                                                                                            | C17H19N3O4S     | 0      | Cytosol               |
| 5homeprazole | 5 hydroxy omeprazole                                |                                                                                                                            | C17H19N3O4S     | 0      | Extracellular         |
| 5shoxindact  | 5-Hydroxyindoleacetaldehyde                         |                                                                                                                            | C10H9NO2        | 0      | Cytosol               |
| 5shoxindact  | 5-Hydroxyindoleacetaldehyde                         |                                                                                                                            | C10H9NO2        | 0      | Mitochondria          |
| 5shoxindoa   | 5-Hydroxyindoleacetate                              |                                                                                                                            | C10H8NO3        | -1     | Cytosol               |
| 5shoxindoa   | 5-Hydroxyindoleacetate                              |                                                                                                                            | C10H8NO3        | -1     | Mitochondria          |
| 5shoxnkyn    | 5-Hydroxy-N-formylkynurenine                        |                                                                                                                            | C11H12N2O5      | 0      | Cytosol               |
| 5HPET        | 5-Hydroperoxy-6-trans-8,11,14-cis-eicosatetraenoate | (6E,8Z,11Z,14Z)-(5S)-5-Hydroperoxyeicosa-6,8,11,14-tetraenoate, 5-HPETE, 5-Hydroperoxy-trans-8,11,14-cis-eicosatetraenoate | C20H31O4        | -1     | Cytosol               |
| 5htrp        | 5-Hydroxy-L-tryptophan                              | 5-HTP                                                                                                                      | C11H12N2O3      | 0      | Cytosol               |
| 5htrp        | 5-Hydroxy-L-tryptophan                              | 5-HTP                                                                                                                      | C11H12N2O3      | 0      | Extracellular         |
| 5hxkyn       | 5-Hydroxykynurenine                                 |                                                                                                                            | C10H12N2O4      | 0      | Cytosol               |
| 5hxkynam     | 5-Hydroxykynurenamine                               |                                                                                                                            | C9H13N2O2       | 1      | Cytosol               |
| 5mdr1p       | 5-Methylthio-D-ribose 1-phosphate                   | 5-Methylthio-D-ribose 1-phosphate, S5-Methyl-5-thio-D-ribose 1-phosphate                                                   | C6H11O7PS       | -2     | Cytosol               |
| 5mdru1p      | 5-Methylthio-5-deoxy-D-ribose 1-phosphate           |                                                                                                                            | C6H11O7PS       | -2     | Cytosol               |
| 5moxact      | 5-Methoxyindoleacetate                              |                                                                                                                            | C11H10NO3       | -1     | Cytosol               |
| 5mta         | 5-Methylthioadenosine                               | 5'-Deoxy-5'-(methylthio)adenosine, 5'-Methylthioadenosine, 5'-S-Methylthioadenosine, Methylthioadenosine                   | C11H15N5O3S     | 0      | Cytosol               |
| 5mthf        | 5-Methyltetrahydrofolate                            | 5-methyl-5,6,7,8-tetrahydrofolate, N5-methyl-5,6,7,8-tetrahydrofolate, N5-methyl-tetrahydrofolate                          | C20H24N7O6      | -1     | Cytosol               |
| 5mthf        | 5-Methyltetrahydrofolate                            | 5-methyl-5,6,7,8-tetrahydrofolate, N5-methyl-5,6,7,8-tetrahydrofolate, N5-methyl-tetrahydrofolate                          | C20H24N7O6      | -1     | Extracellular         |
| 5oxpro       | 5-Oxoproline                                        | 5-Oxoproline, 5-Pyrrolidone-2-carboxylic acid, Pyroglutamate, Pyroglutamic acid                                            | C5H6NO3         | -1     | Cytosol               |
| 5pnev        | (R)-5-Phosphomevalonate                             | (R)-5-Phosphomevalonic acid, (R)-Mevalonic acid 5-phosphate                                                                | C6H10O7P        | -3     | Peroxisome            |
| 5thf         | pentaglutamyl folate (THF)                          |                                                                                                                            | C39H45N11O18    | -6     | Cytosol               |
| 5thf         | pentaglutamyl folate (THF)                          |                                                                                                                            | C39H45N11O18    | -6     | Extracellular         |
| 5thf         | pentaglutamyl folate (THF)                          |                                                                                                                            | C39H45N11O18    | -6     | Lysosome              |
| 5thf         | pentaglutamyl folate (THF)                          |                                                                                                                            | C39H45N11O18    | -6     | Mitochondria          |
| 6a2ohxnt     | 6-Amino-2-oxohexanoate                              | 2-Oxo-6-aminocaproate                                                                                                      | C6H11NO3        | 0      | Peroxisome            |
| 6dhf         | hexaglutamyl folate (DHF)                           |                                                                                                                            | C44H49N12O21    | -7     | Cytosol               |
| 6dhf         | hexaglutamyl folate (DHF)                           |                                                                                                                            | C44H49N12O21    | -7     | Extracellular         |
| 6dhf         | hexaglutamyl folate (DHF)                           |                                                                                                                            | C44H49N12O21    | -7     | Lysosome              |
| 6dhf         | hexaglutamyl folate (DHF)                           |                                                                                                                            | C44H49N12O21    | -7     | Mitochondria          |
| 6hoxmelatn   | 6-Hydroxymelatonin                                  |                                                                                                                            | C13H16N2O3      | 0      | Cytosol               |
| 6htststerone | 6 beta hydroxy testosterone                         |                                                                                                                            | C19H28O3        | 0      | Cytosol               |
| 6htststerone | 6 beta hydroxy testosterone                         |                                                                                                                            | C19H28O3        | 0      | Extracellular         |
| 6htststerone | 6 beta hydroxy testosterone                         |                                                                                                                            | C19H28O3        | 0      | Endoplasmic Reticulum |
| 6pgc         | 6-Phospho-D-gluconate                               | 6-phosphogluconic acid, D-gluconate 6-phosphate                                                                            | C6H10O10P       | -3     | Cytosol               |
| 6pgc         | 6-Phospho-D-gluconate                               | 6-phosphogluconic acid, D-gluconate 6-phosphate                                                                            | C6H10O10P       | -3     | Endoplasmic Reticulum |
| 6pgl         | 6-phospho-D-glucono-1,5-lactone                     | D-Glucono-1,5-lactone 6-phosphate                                                                                          | C6H9O9P         | -2     | Cytosol               |
| 6pgl         | 6-phospho-D-glucono-1,5-lactone                     | D-Glucono-1,5-lactone 6-phosphate                                                                                          | C6H9O9P         | -2     | Endoplasmic Reticulum |
| 6pthp        | 6-Pyruvoyl-5,6,7,8-tetrahydropterin                 | 6-Pyruvoyl-tetrahydropterin, 6-Pyruvoyltetrahydropterin                                                                    | C9H11NSO3       | 0      | Cytosol               |
| 6pthp        | 6-Pyruvoyl-5,6,7,8-tetrahydropterin                 | 6-Pyruvoyl-tetrahydropterin, 6-Pyruvoyltetrahydropterin                                                                    | C9H11NSO3       | 0      | Nucleus               |
| 6thf         | hexaglutamyl folate (THF)                           |                                                                                                                            | C44H51N12O21    | -7     | Cytosol               |
| 6thf         | hexaglutamyl folate (THF)                           |                                                                                                                            | C44H51N12O21    | -7     | Extracellular         |
| 6thf         | hexaglutamyl folate (THF)                           |                                                                                                                            | C44H51N12O21    | -7     | Lysosome              |
| 6thf         | hexaglutamyl folate (THF)                           |                                                                                                                            | C44H51N12O21    | -7     | Mitochondria          |
| 7dhcsterol   | 7-Dehydrocholesterol                                | 7-dien-3beta-ol, Cholesta-5, Provitamin D3                                                                                 | C27H44O         | 0      | Cytosol               |
| 7dhcsterol   | 7-Dehydrocholesterol                                | 7-dien-3beta-ol, Cholesta-5, Provitamin D3                                                                                 | C27H44O         | 0      | Endoplasmic Reticulum |
| 7dhf         | heptaglutamyl folate (DHF)                          |                                                                                                                            | C49H55N13O24    | -8     | Cytosol               |
| 7dhf         | heptaglutamyl folate (DHF)                          |                                                                                                                            | C49H55N13O24    | -8     | Extracellular         |
| 7dhf         | heptaglutamyl folate (DHF)                          |                                                                                                                            | C49H55N13O24    | -8     | Lysosome              |
| 7dhf         | heptaglutamyl folate (DHF)                          |                                                                                                                            | C49H55N13O24    | -8     | Mitochondria          |
| 7dhf         | heptaglutamyl folate (THF)                          |                                                                                                                            | C49H57N13O24    | -8     | Cytosol               |
| 7dhf         | heptaglutamyl folate (THF)                          |                                                                                                                            | C49H57N13O24    | -8     | Extracellular         |
| 7dhf         | heptaglutamyl folate (THF)                          |                                                                                                                            | C49H57N13O24    | -8     | Lysosome              |
| 7dhf         | heptaglutamyl folate (THF)                          |                                                                                                                            | C49H57N13O24    | -8     | Mitochondria          |
| 9-cis-retfa  | fatty acid 9-cis-retinol                            |                                                                                                                            | C20H29OFULLR2CO | 0      | Cytosol               |
| 9-cis-retfa  | fatty acid 9-cis-retinol                            |                                                                                                                            | C20H29OFULLR2CO | 0      | Extracellular         |
| aacoa        | Acetoacetyl-CoA                                     | 3-acetoacetyl-CoA, 3-ketobutanoyl-CoA, 3-ketobutyryl-CoA, 3-oxobutanoyl-CoA, 3-oxobutyryl-CoA, Acetoacetyl coenzyme A      | C25H36N7O18P3S  | 4      | Cytosol               |
| aacoa        | Acetoacetyl-CoA                                     | 3-acetoacetyl-CoA, 3-ketobutanoyl-CoA, 3-ketobutyryl-CoA, 3-oxobutanoyl-CoA, 3-oxobutyryl-CoA, Acetoacetyl coenzyme A      | C25H36N7O18P3S  | 4      | Mitochondria          |

| Abbreviation                                    | Metabolite Name                                  | Synonyms                                                                                                                   | Formula             | Charge | Compartment           |
|-------------------------------------------------|--------------------------------------------------|----------------------------------------------------------------------------------------------------------------------------|---------------------|--------|-----------------------|
| aacoa                                           | Acetoacetyl-CoA                                  | 3-acetoacetyl-CoA, 3-ketobutanoyl-CoA, 3-ketobutyryl-CoA, 3-oxobutanoyl-CoA, 3-oxobutyryl-CoA, Acetoacetyl coenzyme A      | C25H36N7O18P3S      | -4     | Peroxisome            |
| aact                                            | Aminoacetone                                     | 1-Amino-2-propanone                                                                                                        | C3H8NO              | 1      | Cytosol               |
| aact                                            | Aminoacetone                                     | 1-Amino-2-propanone                                                                                                        | C3H8NO              | 1      | Mitochondria          |
| abt                                             | L-Arabinitol                                     | L-Arabinol, L-Arabitol, L-Lyxitol                                                                                          | C5H12O5             | 0      | Cytosol               |
| abt                                             | L-Arabinitol                                     | L-Arabinol, L-Arabitol, L-Lyxitol                                                                                          | C5H12O5             | 0      | Extracellular         |
| ac                                              | Acetate                                          | Acetic acid, Ethanoic acid, Ethylic acid, Methanecarboxylic acid, Vinegar acid, vinegar                                    | C2H3O2              | -1     | Cytosol               |
| ac                                              | Acetate                                          | Acetic acid, Ethanoic acid, Ethylic acid, Methanecarboxylic acid, Vinegar acid, vinegar                                    | C2H3O2              | -1     | Extracellular         |
| ac                                              | Acetate                                          | Acetic acid, Ethanoic acid, Ethylic acid, Methanecarboxylic acid, Vinegar acid, vinegar                                    | C2H3O2              | -1     | Golgi Apparatus       |
| ac                                              | Acetate                                          | Acetic acid, Ethanoic acid, Ethylic acid, Methanecarboxylic acid, Vinegar acid, vinegar                                    | C2H3O2              | -1     | Mitochondria          |
| acac                                            | Acetoacetate                                     | 3-Oxobutanoic acid, Acetoacetic acid, beta-Ketobutyric acid                                                                | C4H5O3              | -1     | Cytosol               |
| acac                                            | Acetoacetate                                     | 3-Oxobutanoic acid, Acetoacetic acid, beta-Ketobutyric acid                                                                | C4H5O3              | -1     | Extracellular         |
| acac                                            | Acetoacetate                                     | 3-Oxobutanoic acid, Acetoacetic acid, beta-Ketobutyric acid                                                                | C4H5O3              | -1     | Mitochondria          |
| acac                                            | Acetoacetate                                     | 3-Oxobutanoic acid, Acetoacetic acid, beta-Ketobutyric acid                                                                | C4H5O3              | -1     | Peroxisome            |
| acACP                                           | Acetyl-ACP                                       |                                                                                                                            | C13H23N2O8PRS       | -1     | Cytosol               |
| acald                                           | Acetaldehyde                                     | Acetaldehyde, Acetic aldehyde, Aldehyde, Aldehyd C(2), Ethanal, Ethyl aldehyde, acetylaldehyde                             | C2H4O               | 0      | Cytosol               |
| acald                                           | Acetaldehyde                                     | Acetaldehyde, Acetic aldehyde, Aldehyde, Aldehyd C(2), Ethanal, Ethyl aldehyde, acetylaldehyde                             | C2H4O               | 0      | Extracellular         |
| acald                                           | Acetaldehyde                                     | Acetaldehyde, Acetic aldehyde, Aldehyde, Aldehyd C(2), Ethanal, Ethyl aldehyde, acetylaldehyde                             | C2H4O               | 0      | Mitochondria          |
| acald                                           | Acetaldehyde                                     | Acetaldehyde, Acetic aldehyde, Aldehyde, Aldehyd C(2), Ethanal, Ethyl aldehyde, acetylaldehyde                             | C2H4O               | 0      | Endoplasmic Reticulum |
| acald                                           | Acetaldehyde                                     | Acetaldehyde, Acetic aldehyde, Aldehyde, Aldehyd C(2), Ethanal, Ethyl aldehyde, acetylaldehyde                             | C2H4O               | 0      | Peroxisome            |
| accoa                                           | Acetyl-CoA                                       | Acetyl coenzyme A                                                                                                          | C23H34N7O17P3S      | -4     | Cytosol               |
| accoa                                           | Acetyl-CoA                                       | Acetyl coenzyme A                                                                                                          | C23H34N7O17P3S      | -4     | Golgi Apparatus       |
| accoa                                           | Acetyl-CoA                                       | Acetyl coenzyme A                                                                                                          | C23H34N7O17P3S      | -4     | Mitochondria          |
| accoa                                           | Acetyl-CoA                                       | Acetyl coenzyme A                                                                                                          | C23H34N7O17P3S      | -4     | Nucleus               |
| accoa                                           | Acetyl-CoA                                       | Acetyl coenzyme A                                                                                                          | C23H34N7O17P3S      | -4     | Endoplasmic Reticulum |
| accoa                                           | Acetyl-CoA                                       | Acetyl coenzyme A                                                                                                          | C23H34N7O17P3S      | -4     | Peroxisome            |
| acetol                                          | Acetol                                           | 1-Hydroxy-2-propanone, 2-Ketopropyl alcohol, Acetone alcohol, Hydroxyacetone, Methylketol, Pyruvic alcohol, Pyruvinalcohol | C3H6O2              | 0      | Cytosol               |
| acetone                                         | Acetone                                          | 2-Propanone, Dimethyl ketone                                                                                               | C3H6O               | 0      | Cytosol               |
| acetone                                         | Acetone                                          | 2-Propanone, Dimethyl ketone                                                                                               | C3H6O               | 0      | Extracellular         |
| acetone                                         | Acetone                                          | 2-Propanone, Dimethyl ketone                                                                                               | C3H6O               | 0      | Mitochondria          |
| acg5p                                           | N-Acetyl-L-glutamyl 5-phosphate                  | N-Acetyl-L-glutamate 5-phosphate                                                                                           | C7H9NO8P            | -3     | Mitochondria          |
| acg5sa                                          | N-Acetyl-L-glutamyl 5-semialdehyde               | 2-Acetamido-5-oxopentanoate                                                                                                | C7H10NO4            | -1     | Mitochondria          |
| acgagbside_hs                                   | alpha GalNAc globoside (homo sapiens)            | GalNAc alpha globoside                                                                                                     | C52H92N3O27FULLRCO  | 0      | Cytosol               |
| acgagbside_hs                                   | alpha GalNAc globoside (homo sapiens)            | GalNAc alpha globoside                                                                                                     | C52H92N3O27FULLRCO  | 0      | Golgi Apparatus       |
| acgagbside_hs                                   | alpha GalNAc globoside (homo sapiens)            | GalNAc alpha globoside                                                                                                     | C52H92N3O27FULLRCO  | 0      | Lysosome              |
| acgal                                           | N-Acetyl-D-galactosamine                         | 2-Acetamido-2-deoxy-D-galactose, GalNAc, N-Acetyl-D-chondrosamine                                                          | C8H15NO6            | 0      | Cytosol               |
| acgal                                           | N-Acetyl-D-galactosamine                         | 2-Acetamido-2-deoxy-D-galactose, GalNAc, N-Acetyl-D-chondrosamine                                                          | C8H15NO6            | 0      | Golgi Apparatus       |
| acgal                                           | N-Acetyl-D-galactosamine                         | 2-Acetamido-2-deoxy-D-galactose, GalNAc, N-Acetyl-D-chondrosamine                                                          | C8H15NO6            | 0      | Lysosome              |
| acgal1p                                         | N-Acetyl-D-galactosamine 1-phosphate             |                                                                                                                            | C8H14NO9P           | -2     | Cytosol               |
| acgalfuc12gal14acglegalgusde_hs                 | (Gal)2 (GalNAc)1 (Glc)1 (GlcNAc)1 (LFuc)1 (Cer)1 |                                                                                                                            | C58H102N3O31FULLRCO | 0      | Golgi Apparatus       |
| acgalfucgalacgalfuc12gal14acglegalguside_hs     | Type IIIA glycolipid                             | (Gal)3 (GalNAc)2 (Glc)1 (GlcNAc)1 (LFuc)2 (Cer)1                                                                           | C78H135N4O45FULLRCO | 0      | Cytosol               |
| acgalfucgalacgalfuc12gal14acglegalguside_hs     | Type IIIA glycolipid                             | (Gal)3 (GalNAc)2 (Glc)1 (GlcNAc)1 (LFuc)2 (Cer)1                                                                           | C78H135N4O45FULLRCO | 0      | Extracellular         |
| acgalfucgalacgalfuc12gal14acglegalguside_hs     | Type IIIA glycolipid                             | (Gal)3 (GalNAc)2 (Glc)1 (GlcNAc)1 (LFuc)2 (Cer)1                                                                           | C78H135N4O45FULLRCO | 0      | Golgi Apparatus       |
| acgalfucgalacgalfucgalcglgal14acglegalguside_hs | Type IIIAb                                       | (Gal)4 (GalNAc)2 (Glc)1 (GlcNAc)2 (LFuc)2 (Cer)1                                                                           | C92H158N5O55FULLRCO | 0      | Cytosol               |
| acgalfucgalacgalfucgalcglgal14acglegalguside_hs | Type IIIAb                                       | (Gal)4 (GalNAc)2 (Glc)1 (GlcNAc)2 (LFuc)2 (Cer)1                                                                           | C92H158N5O55FULLRCO | 0      | Extracellular         |
| acgalfucgalacgalfucgalcglgal14acglegalguside_hs | Type IIIAb                                       | (Gal)4 (GalNAc)2 (Glc)1 (GlcNAc)2 (LFuc)2 (Cer)1                                                                           | C92H158N5O55FULLRCO | 0      | Golgi Apparatus       |
| acgalfucgalacgalfucgalcglgal14acglegalguside_hs | (Gal)3 (GalNAc)1 (Glc)1 (GlcNAc)2 (LFuc)1 (Cer)1 |                                                                                                                            | C72H125N4O41FULLRCO | 0      | Golgi Apparatus       |
| acgalfucgalacgalfucgalcglgal14acglegalguside_hs | Type IA glycolipid                               | (Gal)2 (GalNAc)1 (Glc)1 (GlcNAc)1 (LFuc)1 (Cer)1                                                                           | C58H102N3O31FULLRCO | 0      | Golgi Apparatus       |
| acgam                                           | N-Acetyl-D-glucosamine                           | 2-Acetamido-2-deoxy-D-glucose, GlcNAc, N-Acetylchitosamine                                                                 | C8H15NO6            | 0      | Cytosol               |



| Abbreviation                        | Metabolite Name                                              | Synonyms                                                                                                 | Formula                      | Charge | Compartment           |
|-------------------------------------|--------------------------------------------------------------|----------------------------------------------------------------------------------------------------------|------------------------------|--------|-----------------------|
| acgam                               | N-Acetyl-D-glucosamine                                       | 2-Acetamido-2-deoxy-D-glucose, GlcNAc, N-Acetylchitosamine                                               | C8H15NO6                     | 0      | Extracellular         |
| acgam                               | N-Acetyl-D-glucosamine                                       | 2-Acetamido-2-deoxy-D-glucose, GlcNAc, N-Acetylchitosamine                                               | C8H15NO6                     | 0      | Lysosome              |
| acgam1p                             | N-Acetyl-D-glucosamine 1-phosphate                           |                                                                                                          | C8H14NO9P                    | -2     | Cytosol               |
| acgam6p                             | N-Acetyl-D-glucosamine 6-phosphate                           |                                                                                                          | C8H14NO9P                    | -2     | Cytosol               |
| acgbgbside_hs                       | beta GalNAc globoside (homo sapiens)                         | IV3GalNAcb-Gb4Cer                                                                                        | C52H92N3O27FULLRCO           | 0      | Cytosol               |
| acgbgbside_hs                       | beta GalNAc globoside (homo sapiens)                         | IV3GalNAcb-Gb4Cer                                                                                        | C52H92N3O27FULLRCO           | 0      | Golgi Apparatus       |
| acgbgbside_hs                       | beta GalNAc globoside (homo sapiens)                         | IV3GalNAcb-Gb4Cer                                                                                        | C52H92N3O27FULLRCO           | 0      | Lysosome              |
| acglc13galacglgal14acglcgaluside_hs | nLc7Cer                                                      |                                                                                                          | C66H115N4O37FULLRCO          | 0      | Golgi Apparatus       |
| acglcgal14acglcgaluside_hs          | nLc5Cer                                                      | (Gal)2 (Glc)1 (GlcNAc)2 (Cer)1                                                                           | C52H92N3O27FULLRCO           | 0      | Golgi Apparatus       |
| acglcgalacglgal14acglcgaluside_hs   | (Gal)3 (Glc)1 (GlcNAc)3 (Cer)1                               |                                                                                                          | C66H115N4O37FULLRCO          | 0      | Golgi Apparatus       |
| acglcgalgbside_hs                   | GlcNAc-Gal globoside (homo sapiens)                          | (Gal)3 (GalNAc)1 (Glc)1 (GlcNAc)1 (Cer)1                                                                 | C58H102N3O32FULLRCO          | 0      | Golgi Apparatus       |
| acglcgaluside_hs                    | (Gal)1 (Glc)1 (GlcNAc)1 (Cer)1                               | Lc3Cer                                                                                                   | C38H69N2O17FULLRCO           | 0      | Golgi Apparatus       |
| acglu                               | N-Acetyl-L-glutamate                                         | N-Acetyl-L-glutamic acid                                                                                 | C7H9NO5                      | -2     | Mitochondria          |
| acgpail_hs                          | N-Acetyl-D-glucosaminylphosphatidylinositol                  |                                                                                                          | C17H29NO14PFULLRCO2FULLR2CO2 | -1     | Cytosol               |
| ach                                 | Acetylcholine                                                | Acetylcholine, O-Acetylcholine                                                                           | C7H16NO2                     | 1      | Cytosol               |
| ach                                 | Acetylcholine                                                | Acetylcholine, O-Acetylcholine                                                                           | C7H16NO2                     | 1      | Extracellular         |
| ach                                 | Acetylcholine                                                | Acetylcholine, O-Acetylcholine                                                                           | C7H16NO2                     | 1      | Nucleus               |
| acmana                              | N-Acetyl-D-mannosamine                                       | 2-Acetamido-2-deoxy-D-mannose                                                                            | C8H15NO6                     | 0      | Cytosol               |
| acmanap                             | N-Acetyl-D-mannosamine 6-phosphate                           | N-Acetyl-D-mannosamine 6-phosphate, N-Acetylmannosamine 6-phosphate                                      | C8H14NO9P                    | -2     | Cytosol               |
| acn13acngalgsbside_hs               | sialyl (1,3) sialyl (2,6) galactosylgloboside (homo sapiens) | Disialosyl Gb5, Disialosylgalactosylgloboside, Disialosylglobopentaosylceramide, V3NeuAcIV6NeuAc-Gb5Cer; | C72H121N4O43FULLRCO          | -2     | Cytosol               |
| acn13acngalgsbside_hs               | sialyl (1,3) sialyl (2,6) galactosylgloboside (homo sapiens) | Disialosyl Gb5, Disialosylgalactosylgloboside, Disialosylglobopentaosylceramide, V3NeuAcIV6NeuAc-Gb5Cer; | C72H121N4O43FULLRCO          | -2     | Extracellular         |
| acn13acngalgsbside_hs               | sialyl (1,3) sialyl (2,6) galactosylgloboside (homo sapiens) | Disialosyl Gb5, Disialosylgalactosylgloboside, Disialosylglobopentaosylceramide, V3NeuAcIV6NeuAc-Gb5Cer; | C72H121N4O43FULLRCO          | -2     | Golgi Apparatus       |
| acn23acngalgsbside_hs               | sialyl (2,3) sialyl (2,6) galactosylgloboside (homo sapiens) | (Gal)3 (GalNAc)1 (Glc)1 (Neu5Ac)2 (Cer)1                                                                 | C72H121N4O43FULLRCO          | -2     | Cytosol               |
| acn23acngalgsbside_hs               | sialyl (2,3) sialyl (2,6) galactosylgloboside (homo sapiens) | (Gal)3 (GalNAc)1 (Glc)1 (Neu5Ac)2 (Cer)1                                                                 | C72H121N4O43FULLRCO          | -2     | Extracellular         |
| acn23acngalgsbside_hs               | sialyl (2,3) sialyl (2,6) galactosylgloboside (homo sapiens) | (Gal)3 (GalNAc)1 (Glc)1 (Neu5Ac)2 (Cer)1                                                                 | C72H121N4O43FULLRCO          | -2     | Golgi Apparatus       |
| acnangal14acglcgalgalside_hs        | 3,8'-LD1                                                     | (Gal)2 (Glc)1 (GlcNAc)1 (Neu5Ac)2 (Cer)1                                                                 | C66H111N4O38FULLRCO          | -2     | Cytosol               |
| acnangal14acglcgalgalside_hs        | 3,8'-LD1                                                     | (Gal)2 (Glc)1 (GlcNAc)1 (Neu5Ac)2 (Cer)1                                                                 | C66H111N4O38FULLRCO          | -2     | Extracellular         |
| acnangal14acglcgalgalside_hs        | 3,8'-LD1                                                     | (Gal)2 (Glc)1 (GlcNAc)1 (Neu5Ac)2 (Cer)1                                                                 | C66H111N4O38FULLRCO          | -2     | Golgi Apparatus       |
| acnangalgsbside_hs                  | disialyl galactosylgloboside (homo sapiens)                  | V3(NeuAc)2-Gb5Cer                                                                                        | C72H121N4O43FULLRCO          | -2     | Cytosol               |
| acnangalgsbside_hs                  | disialyl galactosylgloboside (homo sapiens)                  | V3(NeuAc)2-Gb5Cer                                                                                        | C72H121N4O43FULLRCO          | -2     | Extracellular         |
| acnangalgsbside_hs                  | disialyl galactosylgloboside (homo sapiens)                  | V3(NeuAc)2-Gb5Cer                                                                                        | C72H121N4O43FULLRCO          | -2     | Golgi Apparatus       |
| acnam                               | N-Acetylneuraminate                                          | 5-Acetamido-3,5-dideoxy-D-glycero-D-galacto-2-nomulosonic acid, N-Acetylneuraminic acid, Neu5Ac          | C11H18NO9                    | -1     | Cytosol               |
| acnam                               | N-Acetylneuraminate                                          | 5-Acetamido-3,5-dideoxy-D-glycero-D-galacto-2-nomulosonic acid, N-Acetylneuraminic acid, Neu5Ac          | C11H18NO9                    | -1     | Lysosome              |
| acnam                               | N-Acetylneuraminate                                          | 5-Acetamido-3,5-dideoxy-D-glycero-D-galacto-2-nomulosonic acid, N-Acetylneuraminic acid, Neu5Ac          | C11H18NO9                    | -1     | Nucleus               |
| acnamp                              | N-Acetylneuraminate 9-phosphate                              |                                                                                                          | C11H17NO12P                  | -3     | Cytosol               |
| acngal14acglcgalgalside_hs          | Sialyl-3-paragloboside                                       | (Gal)2 (Glc)1 (GlcNAc)1 (Neu5Ac)1 (Cer)1, 3'-LM1, IV3-a-Neu5Ac-nLc4Cer, Sialyl-3-paragloboside, snLc4Cer | C55H95N3O30FULLRCO           | -1     | Golgi Apparatus       |
| acngalacglcgal14acglcgalgalside_hs  | V13NeuAc-nLc6Cer                                             | (Gal)3 (Glc)1 (GlcNAc)2 (Neu5Ac)1 (Cer)1                                                                 | C69H118N4O40FULLRCO          | -1     | Cytosol               |
| acngalacglcgal14acglcgalgalside_hs  | V13NeuAc-nLc6Cer                                             | (Gal)3 (Glc)1 (GlcNAc)2 (Neu5Ac)1 (Cer)1                                                                 | C69H118N4O40FULLRCO          | -1     | Extracellular         |
| acngalacglcgal14acglcgalgalside_hs  | V13NeuAc-nLc6Cer                                             | (Gal)3 (Glc)1 (GlcNAc)2 (Neu5Ac)1 (Cer)1                                                                 | C69H118N4O40FULLRCO          | -1     | Golgi Apparatus       |
| acngalacglcgalgalside_hs            | (Gal)3 (Glc)1 (GlcNAc)1 (Cer)1                               |                                                                                                          | C55H95N3O30FULLRCO           | -1     | Golgi Apparatus       |
| acngalgsbside_hs                    | sialyl galactosylgloboside (homo sapiens)                    | MSGG, Monosialyl-Gb5, Monosialylgalactosylgloboside, SSEA-4, V3NeuAc-Gb5Cer                              | C61H105N3O35FULLRCO          | -1     | Golgi Apparatus       |
| acorn                               | N2-Acetyl-L-ornithine                                        |                                                                                                          | C7H14N2O3                    | 0      | Cytosol               |
| ACP                                 | acyl carrier protein                                         |                                                                                                          | C11H21N2O7PRS                | -1     | Cytosol               |
| ACP                                 | acyl carrier protein                                         |                                                                                                          | C11H21N2O7PRS                | -1     | Mitochondria          |
| acrn                                | O-Acetylcamitine                                             |                                                                                                          | C9H17NO4                     | 0      | Cytosol               |
| acrn                                | O-Acetylcamitine                                             |                                                                                                          | C9H17NO4                     | 0      | Mitochondria          |
| acrn                                | O-Acetylcamitine                                             |                                                                                                          | C9H17NO4                     | 0      | Endoplasmic Reticulum |
| acrn                                | O-Acetylcamitine                                             |                                                                                                          | C9H17NO4                     | 0      | Peroxisome            |
| ade                                 | Adenine                                                      | 1H-Purin-6-amine, 6-Aminopurine, A, Ade, Adeninimine, Vitamin B4                                         | C5H5N5                       | 0      | Cytosol               |
| ade                                 | Adenine                                                      | 1H-Purin-6-amine, 6-Aminopurine, A, Ade, Adeninimine, Vitamin B4                                         | C5H5N5                       | 0      | Extracellular         |
| ade                                 | Adenine                                                      | 1H-Purin-6-amine, 6-Aminopurine, A, Ade, Adeninimine, Vitamin B4                                         | C5H5N5                       | 0      | Lysosome              |
| adhap_hs                            | acyl-dihydroxyacetone phosphate                              |                                                                                                          | C3H4O6PFULLRCO               | -2     | Cytosol               |

| Abbreviation   | Metabolite Name                           | Synonyms                                                                                                                                                                                                                                                                                                                                                                                                                                                                                                                                        | Formula          | Charge | Compartment           |
|----------------|-------------------------------------------|-------------------------------------------------------------------------------------------------------------------------------------------------------------------------------------------------------------------------------------------------------------------------------------------------------------------------------------------------------------------------------------------------------------------------------------------------------------------------------------------------------------------------------------------------|------------------|--------|-----------------------|
| adhap_hs       | acyl-dihydroxyacetone phosphate           |                                                                                                                                                                                                                                                                                                                                                                                                                                                                                                                                                 | C3H4O6PFULLRSCO  | -2     | Peroxisome            |
| adn            | Adenosine                                 | 9-B-D-ribofuranosyl-9H-purin-6-amine, 9-beta-D-Ribofuranosyladenine, Adenine riboside, Adenocard, rA                                                                                                                                                                                                                                                                                                                                                                                                                                            | C10H13NSO4       | 0      | Cytosol               |
| adn            | Adenosine                                 | 9-B-D-ribofuranosyl-9H-purin-6-amine, 9-beta-D-Ribofuranosyladenine, Adenine riboside, Adenocard, rA                                                                                                                                                                                                                                                                                                                                                                                                                                            | C10H13NSO4       | 0      | Extracellular         |
| adn            | Adenosine                                 | 9-B-D-ribofuranosyl-9H-purin-6-amine, 9-beta-D-Ribofuranosyladenine, Adenine riboside, Adenocard, rA                                                                                                                                                                                                                                                                                                                                                                                                                                            | C10H13NSO4       | 0      | Lysosome              |
| adn            | Adenosine                                 | 9-B-D-ribofuranosyl-9H-purin-6-amine, 9-beta-D-Ribofuranosyladenine, Adenine riboside, Adenocard, rA                                                                                                                                                                                                                                                                                                                                                                                                                                            | C10H13NSO4       | 0      | Mitochondria          |
| adocbl         | Adenosylcobalamin                         | (5, (5'-Deoxy-5'-adenosyl)cobamide coenzyme, 5,5-Deoxy-5'-adenosyl vitamin B12, 5'-Deoxy-5'-adenosyl-5, 5'-Deoxy-5'-adenosylcobalamin, 6-Dimethylbenzimidazolylcobamide coenzyme, 6-Dimethylbenzimidazolyl-5-deoxyadenosylcobamide, 6-Dimethylbenzimidazolyl-Co-5'-deoxy-5'-adenosylcobamide, 6-dimethylbenzimidazolylcobamide coenzyme, 6-dimethylbenzimidazolylcobamide, Adenosylcobalamin, Calomide, Cobalamin coenzyme, Cobamamide, Coenzyme B12, DMBC coenzyme, Deoxyadenosylcobalamin, Dibencozide Funacomide, Vitamin B12 coenzyme, a-(5 | C72H100CoN18O17P | 0      | Mitochondria          |
| adp            | ADP                                       | Adenosine 5'-diphosphate                                                                                                                                                                                                                                                                                                                                                                                                                                                                                                                        | C10H12NSO10P2    | -3     | Cytosol               |
| adp            | ADP                                       | Adenosine 5'-diphosphate                                                                                                                                                                                                                                                                                                                                                                                                                                                                                                                        | C10H12NSO10P2    | -3     | Extracellular         |
| adp            | ADP                                       | Adenosine 5'-diphosphate                                                                                                                                                                                                                                                                                                                                                                                                                                                                                                                        | C10H12NSO10P2    | -3     | Mitochondria          |
| adp            | ADP                                       | Adenosine 5'-diphosphate                                                                                                                                                                                                                                                                                                                                                                                                                                                                                                                        | C10H12NSO10P2    | -3     | Nucleus               |
| adp            | ADP                                       | Adenosine 5'-diphosphate                                                                                                                                                                                                                                                                                                                                                                                                                                                                                                                        | C10H12NSO10P2    | -3     | Endoplasmic Reticulum |
| adp            | ADP                                       | Adenosine 5'-diphosphate                                                                                                                                                                                                                                                                                                                                                                                                                                                                                                                        | C10H12NSO10P2    | -3     | Peroxisome            |
| adpglc         | ADPglucose                                | Adenosine diphosphoglucose                                                                                                                                                                                                                                                                                                                                                                                                                                                                                                                      | C16H23NSO15P2    | -2     | Cytosol               |
| adpman         | ADPmannose                                |                                                                                                                                                                                                                                                                                                                                                                                                                                                                                                                                                 | C16H23NSO15P2    | -2     | Cytosol               |
| adprbp         | ADPribose 2'-phosphate                    |                                                                                                                                                                                                                                                                                                                                                                                                                                                                                                                                                 | C15H20NSO17P3    | -4     | Cytosol               |
| adprbp         | ADPribose 2'-phosphate                    |                                                                                                                                                                                                                                                                                                                                                                                                                                                                                                                                                 | C15H20NSO17P3    | -4     | Extracellular         |
| adprib         | ADPribose                                 | ADP-D-ribose, ADP-ribose, adenine-diphosphate-ribose, adenosine diphosphate ribose                                                                                                                                                                                                                                                                                                                                                                                                                                                              | C15H21NSO14P2    | -2     | Cytosol               |
| adprib         | ADPribose                                 | ADP-D-ribose, ADP-ribose, adenine-diphosphate-ribose, adenosine diphosphate ribose                                                                                                                                                                                                                                                                                                                                                                                                                                                              | C15H21NSO14P2    | -2     | Extracellular         |
| adprib         | ADPribose                                 | ADP-D-ribose, ADP-ribose, adenine-diphosphate-ribose, adenosine diphosphate ribose                                                                                                                                                                                                                                                                                                                                                                                                                                                              | C15H21NSO14P2    | -2     | Mitochondria          |
| adrn           | adrenic acid                              | adrenic acid(22:4,n-6), docosa-7,10,13,16-tetraenoic acid                                                                                                                                                                                                                                                                                                                                                                                                                                                                                       | C22H35O2         | -1     | Cytosol               |
| adrn           | adrenic acid                              | adrenic acid(22:4,n-6), docosa-7,10,13,16-tetraenoic acid                                                                                                                                                                                                                                                                                                                                                                                                                                                                                       | C22H35O2         | -1     | Extracellular         |
| adrn           | adrenic acid                              | adrenic acid(22:4,n-6), docosa-7,10,13,16-tetraenoic acid                                                                                                                                                                                                                                                                                                                                                                                                                                                                                       | C22H35O2         | -1     | Peroxisome            |
| adrncoa        | adrenyl coenzyme A                        |                                                                                                                                                                                                                                                                                                                                                                                                                                                                                                                                                 | C43H66N7O17P3S   | -4     | Cytosol               |
| adrncoa        | adrenyl coenzyme A                        |                                                                                                                                                                                                                                                                                                                                                                                                                                                                                                                                                 | C43H66N7O17P3S   | -4     | Mitochondria          |
| adrncoa        | adrenyl coenzyme A                        |                                                                                                                                                                                                                                                                                                                                                                                                                                                                                                                                                 | C43H66N7O17P3S   | -4     | Peroxisome            |
| adrncrn        | Adrenyl carnitine                         | adrenic acid carnitine                                                                                                                                                                                                                                                                                                                                                                                                                                                                                                                          | C29H49NO4        | 0      | Cytosol               |
| adrncrn        | Adrenyl carnitine                         | adrenic acid carnitine                                                                                                                                                                                                                                                                                                                                                                                                                                                                                                                          | C29H49NO4        | 0      | Mitochondria          |
| adrl           | Adrenaline                                | (R)-(-)-Adrenaline, (R)-(-)-Adrenaline, (R)-(-)-Epinephrine, (R)-(-)-Eprenamine, 2-benzenediol, [(1R)-1-Hydroxy-2-(methylamino)ethyl]-1, L-Adrenaline                                                                                                                                                                                                                                                                                                                                                                                           | C9H14NO3         | 1      | Cytosol               |
| adrl           | Adrenaline                                | (R)-(-)-Adrenaline, (R)-(-)-Adrenaline, (R)-(-)-Epinephrine, (R)-(-)-Eprenamine, 2-benzenediol, [(1R)-1-Hydroxy-2-(methylamino)ethyl]-1, L-Adrenaline                                                                                                                                                                                                                                                                                                                                                                                           | C9H14NO3         | 1      | Extracellular         |
| adsel          | Adenylselenate                            | Adenosine-5'-phosphoselenate                                                                                                                                                                                                                                                                                                                                                                                                                                                                                                                    | C10H12NSO10PSe   | -2     | Cytosol               |
| aflatoxin      | aflatoxin B1                              | 2,3-Epoxyaflatoxin B1, Aflatoxin B1 2,3-epoxide, Aflatoxin B1 8,9-epoxide, Aflatoxin B1 8,9-oxide, Aflatoxin B1 epoxide, Aflatoxin B1-2,3-oxide [MeSH: aflatoxin B1-2,3-oxide]                                                                                                                                                                                                                                                                                                                                                                  | C17H12O6         | 0      | Cytosol               |
| aflatoxin      | aflatoxin B1                              | 2,3-Epoxyaflatoxin B1, Aflatoxin B1 2,3-epoxide, Aflatoxin B1 8,9-epoxide, Aflatoxin B1 8,9-oxide, Aflatoxin B1 epoxide, Aflatoxin B1-2,3-oxide [MeSH: aflatoxin B1-2,3-oxide]                                                                                                                                                                                                                                                                                                                                                                  | C17H12O6         | 0      | Extracellular         |
| agm            | Agmatine                                  | (4-Aminobutyl) guanidine                                                                                                                                                                                                                                                                                                                                                                                                                                                                                                                        | C5H16N4          | 2      | Mitochondria          |
| ahandrostan    | 3alpha-Hydroxy-5beta-androstan-17-one     | 3alpha-Hydroxy-5beta-androstan-17-one, 3alpha-Hydroxyetiocholan-17-one, Etiocholan-3alpha-ol-17-one                                                                                                                                                                                                                                                                                                                                                                                                                                             | C19H30O2         | 0      | Endoplasmic Reticulum |
| ahandrostanglc | Etiocholan-3alpha-ol-17-one 3-glucuronide |                                                                                                                                                                                                                                                                                                                                                                                                                                                                                                                                                 | C25H38O8         | 0      | Cytosol               |
| ahandrostanglc | Etiocholan-3alpha-ol-17-one 3-glucuronide |                                                                                                                                                                                                                                                                                                                                                                                                                                                                                                                                                 | C25H38O8         | 0      | Extracellular         |
| ahandrostanglc | Etiocholan-3alpha-ol-17-one 3-glucuronide |                                                                                                                                                                                                                                                                                                                                                                                                                                                                                                                                                 | C25H38O8         | 0      | Endoplasmic Reticulum |
| ahcys          | S-Adenosyl-L-homocysteine                 | S-Adenosylhomocysteine                                                                                                                                                                                                                                                                                                                                                                                                                                                                                                                          | C14H20N6O5S      | 0      | Cytosol               |
| ahcys          | S-Adenosyl-L-homocysteine                 | S-Adenosylhomocysteine                                                                                                                                                                                                                                                                                                                                                                                                                                                                                                                          | C14H20N6O5S      | 0      | Mitochondria          |
| ahcys          | S-Adenosyl-L-homocysteine                 | S-Adenosylhomocysteine                                                                                                                                                                                                                                                                                                                                                                                                                                                                                                                          | C14H20N6O5S      | 0      | Nucleus               |

| Abbreviation | Metabolite Name                                                                   | Synonyms                                                                                                                                                                                                                                                                        | Formula                 | Charge | Compartment           |
|--------------|-----------------------------------------------------------------------------------|---------------------------------------------------------------------------------------------------------------------------------------------------------------------------------------------------------------------------------------------------------------------------------|-------------------------|--------|-----------------------|
| ahcys        | S-Adenosyl-L-homocysteine                                                         | S-Adenosylhomocysteine                                                                                                                                                                                                                                                          | C14H20N6O5S             | 0      | Endoplasmic Reticulum |
| ahdt         | 2-Amino-4-hydroxy-6-(erythro-1,2,3-trihydroxypropyl)dihydropteridine triphosphate | 2-Amino-4-hydroxy-6-(erythro-1,2,3-trihydroxypropyl)dihydropteridine triphosphate, 6-(L-erythro-1,2-Dihydroxypropyl 3-triphosphate)-7-dihydropterin, 6-[(1S,2R)-1,2-Dihydroxy-3-triphosphoxypropyl]-7,8-dihydropterin, H2-neopterin triphosphate, dihydroneopterin triphosphate | C9H12N5O13P3            | -4     | Cytosol               |
| ahdt         | 2-Amino-4-hydroxy-6-(erythro-1,2,3-trihydroxypropyl)dihydropteridine triphosphate | 2-Amino-4-hydroxy-6-(erythro-1,2,3-trihydroxypropyl)dihydropteridine triphosphate, 6-(L-erythro-1,2-Dihydroxypropyl 3-triphosphate)-7-dihydropterin, 6-[(1S,2R)-1,2-Dihydroxy-3-triphosphoxypropyl]-7,8-dihydropterin, H2-neopterin triphosphate, dihydroneopterin triphosphate | C9H12N5O13P3            | -4     | Nucleus               |
| aicar        | 5-Amino-1-(5-Phospho-D-ribose)imidazole-4-carboxamide                             | 1-(5'-Phosphoribosyl)-5-amino-4-imidazolecarboxamide, 5'-Phospho-ribose-1,5-amino-4-imidazolecarboxamide, 5-Aminoimidazole-4-carboxamide ribotide, 5-Phosphoribosyl-4-carbamoyl-5-aminoimidazole, AICAR                                                                         | C9H13N4O8P              | -2     | Cytosol               |
| air          | 5-amino-1-(5-phospho-D-ribose)imidazole                                           | 1-(5'-Phosphoribosyl)-5-aminoimidazole, 1-(5-Phospho-D-ribose)-5-aminoimidazole, 5'-Phosphoribosyl-5-aminoimidazole, AIR, Aminoimidazole ribotide                                                                                                                               | C8H12N3O7P              | -2     | Cytosol               |
| ak2g_hs      | 1-alkyl 2-acylglycerol                                                            |                                                                                                                                                                                                                                                                                 | C5H10O2FULLRFULLR2CO2   | 0      | Cytosol               |
| ak2gchol_hs  | 1-alkyl 2-acylglycerol 3-phosphocholine                                           |                                                                                                                                                                                                                                                                                 | C10H20O5NPFULLRFULLR2CO | 0      | Cytosol               |
| ak2gp_hs     | 1-alkyl 2-acylglycerol 3-phosphate                                                |                                                                                                                                                                                                                                                                                 | C5H9O6PFULLRFULLR2CO    | -2     | Cytosol               |
| ak2gpe_hs    | 1-alkyl 2-acylglycerol 3-phosphoethanolamine                                      |                                                                                                                                                                                                                                                                                 | C7H16O5NPFULLRFULLR2CO  | 0      | Cytosol               |
| ak2lgchol_hs | 1-alkyl 2-lysoglycerol 3-phosphocholine                                           | 1-Organyl-2-lyso-sn-glycero-3-phosphocholine, 1-Radyl-2-lyso-sn-glycero-3-phosphocholine                                                                                                                                                                                        | C10H21O5NPFULLR         | 0      | Cytosol               |
| ak2lgchol_hs | 1-alkyl 2-lysoglycerol 3-phosphocholine                                           | 1-Organyl-2-lyso-sn-glycero-3-phosphocholine, 1-Radyl-2-lyso-sn-glycero-3-phosphocholine                                                                                                                                                                                        | C10H21O5NPFULLR         | 0      | Extracellular         |
| akdhap_hs    | 1-alkylidihydroxyacetone phosphate                                                |                                                                                                                                                                                                                                                                                 | C3H4O6PFULLRC2H4        | -2     | Cytosol               |
| akdhap_hs    | 1-alkylidihydroxyacetone phosphate                                                |                                                                                                                                                                                                                                                                                 | C3H4O6PFULLRC2H4        | -2     | Peroxisome            |
| akg          | 2-Oxoglutarate                                                                    | 2-Ketoglutaric acid, Oxoglutaric acid, alpha-Ketoglutarate, alpha-Ketoglutaric Acid                                                                                                                                                                                             | C5H4O5                  | -2     | Cytosol               |
| akg          | 2-Oxoglutarate                                                                    | 2-Ketoglutaric acid, Oxoglutaric acid, alpha-Ketoglutarate, alpha-Ketoglutaric Acid                                                                                                                                                                                             | C5H4O5                  | -2     | Extracellular         |
| akg          | 2-Oxoglutarate                                                                    | 2-Ketoglutaric acid, Oxoglutaric acid, alpha-Ketoglutarate, alpha-Ketoglutaric Acid                                                                                                                                                                                             | C5H4O5                  | -2     | Mitochondria          |
| akg          | 2-Oxoglutarate                                                                    | 2-Ketoglutaric acid, Oxoglutaric acid, alpha-Ketoglutarate, alpha-Ketoglutaric Acid                                                                                                                                                                                             | C5H4O5                  | -2     | Endoplasmic Reticulum |
| akg          | 2-Oxoglutarate                                                                    | 2-Ketoglutaric acid, Oxoglutaric acid, alpha-Ketoglutarate, alpha-Ketoglutaric Acid                                                                                                                                                                                             | C5H4O5                  | -2     | Peroxisome            |
| akgp_hs      | 1-alkylglycerol 3-phosphate (homo sapiens)                                        |                                                                                                                                                                                                                                                                                 | C4H10O4PFULLR2CO2       | -2     | Cytosol               |
| ala-B        | beta-Alanine                                                                      | 3-Aminopropanoate, 3-aminopropionic acid                                                                                                                                                                                                                                        | C3H7NO2                 | 0      | Cytosol               |
| ala-B        | beta-Alanine                                                                      | 3-Aminopropanoate, 3-aminopropionic acid                                                                                                                                                                                                                                        | C3H7NO2                 | 0      | Extracellular         |
| ala-B        | beta-Alanine                                                                      | 3-Aminopropanoate, 3-aminopropionic acid                                                                                                                                                                                                                                        | C3H7NO2                 | 0      | Mitochondria          |
| ala-D        | D-Alanine                                                                         | D-2-Aminopropionic acid                                                                                                                                                                                                                                                         | C3H7NO2                 | 0      | Cytosol               |
| ala-D        | D-Alanine                                                                         | D-2-Aminopropionic acid                                                                                                                                                                                                                                                         | C3H7NO2                 | 0      | Extracellular         |
| ala-D        | D-Alanine                                                                         | D-2-Aminopropionic acid                                                                                                                                                                                                                                                         | C3H7NO2                 | 0      | Lysosome              |
| ala-D        | D-Alanine                                                                         | D-2-Aminopropionic acid                                                                                                                                                                                                                                                         | C3H7NO2                 | 0      | Peroxisome            |
| ala-L        | L-Alanine                                                                         | L-2-Aminopropionic acid, L-alpha-Alanine                                                                                                                                                                                                                                        | C3H7NO2                 | 0      | Cytosol               |
| ala-L        | L-Alanine                                                                         | L-2-Aminopropionic acid, L-alpha-Alanine                                                                                                                                                                                                                                        | C3H7NO2                 | 0      | Extracellular         |
| ala-L        | L-Alanine                                                                         | L-2-Aminopropionic acid, L-alpha-Alanine                                                                                                                                                                                                                                        | C3H7NO2                 | 0      | Lysosome              |
| ala-L        | L-Alanine                                                                         | L-2-Aminopropionic acid, L-alpha-Alanine                                                                                                                                                                                                                                        | C3H7NO2                 | 0      | Mitochondria          |
| ala-L        | L-Alanine                                                                         | L-2-Aminopropionic acid, L-alpha-Alanine                                                                                                                                                                                                                                        | C3H7NO2                 | 0      | Peroxisome            |
| aldstrn      | Aldosterone                                                                       | 11beta,21-Dihydroxy-3,20-dioxo-4-pregnen-18-al, Aldosterone                                                                                                                                                                                                                     | C21H28O5                | 0      | Cytosol               |
| aldstrn      | Aldosterone                                                                       | 11beta,21-Dihydroxy-3,20-dioxo-4-pregnen-18-al, Aldosterone                                                                                                                                                                                                                     | C21H28O5                | 0      | Extracellular         |
| aldstrn      | Aldosterone                                                                       | 11beta,21-Dihydroxy-3,20-dioxo-4-pregnen-18-al, Aldosterone                                                                                                                                                                                                                     | C21H28O5                | 0      | Mitochondria          |
| alkylR1oh    | hydroxy alkyl chain                                                               |                                                                                                                                                                                                                                                                                 | C2H5OFULLR              | 0      | Peroxisome            |
| alpa_hs      | lysophosphatidic acid (homo sapiens)                                              |                                                                                                                                                                                                                                                                                 | C3H6O5PFULLR2CO2        | -2     | Cytosol               |
| alpa_hs      | lysophosphatidic acid (homo sapiens)                                              |                                                                                                                                                                                                                                                                                 | C3H6O5PFULLR2CO2        | -2     | Mitochondria          |
| alpm         | S-aminomethylidihydropoamide                                                      |                                                                                                                                                                                                                                                                                 | C9H21N2O5S2             | 1      | Mitochondria          |

| Abbreviation | Metabolite Name                                                | Synonyms                                                                                                                                                                   | Formula         | Charge | Compartment           |
|--------------|----------------------------------------------------------------|----------------------------------------------------------------------------------------------------------------------------------------------------------------------------|-----------------|--------|-----------------------|
| alpro        | S-Aminomethylidihydrolypoilprotein                             |                                                                                                                                                                            | CH6NS2X         | 1      | Mitochondria          |
| am6sa        | 2-Aminomuconate 6-semialdehyde                                 | 2-Aminomuconate semialdehyde                                                                                                                                               | C6H7NO3         | 0      | Cytosol               |
| amet         | S-Adenosyl-L-methionine                                        | Acylcarnitine, S-Adenosylmethionine                                                                                                                                        | C15H23N6O5S     | 1      | Cytosol               |
| amet         | S-Adenosyl-L-methionine                                        | Acylcarnitine, S-Adenosylmethionine                                                                                                                                        | C15H23N6O5S     | 1      | Mitochondria          |
| amet         | S-Adenosyl-L-methionine                                        | Acylcarnitine, S-Adenosylmethionine                                                                                                                                        | C15H23N6O5S     | 1      | Nucleus               |
| amet         | S-Adenosyl-L-methionine                                        | Acylcarnitine, S-Adenosylmethionine                                                                                                                                        | C15H23N6O5S     | 1      | Endoplasmic Reticulum |
| ametam       | S-Adenosylmethioninamine                                       | (5-Deoxy-5-adenosyl)(3-aminopropyl)methylsulfonium salt, S-Adenosyl-L-methioninamine                                                                                       | C14H24N6O3S     | 2      | Cytosol               |
| amp          | AMP                                                            | 5'-AMP, 5'-Adenosine monophosphate, 5'-Adenylic acid, Adenosine 5'-monophosphate, Adenosine 5'-phosphate, Adenylate, Adenylic acid                                         | C10H12NSO7P     | -2     | Cytosol               |
| amp          | AMP                                                            | 5'-AMP, 5'-Adenosine monophosphate, 5'-Adenylic acid, Adenosine 5'-monophosphate, Adenosine 5'-phosphate, Adenylate, Adenylic acid                                         | C10H12NSO7P     | -2     | Extracellular         |
| amp          | AMP                                                            | 5'-AMP, 5'-Adenosine monophosphate, 5'-Adenylic acid, Adenosine 5'-monophosphate, Adenosine 5'-phosphate, Adenylate, Adenylic acid                                         | C10H12NSO7P     | -2     | Golgi Apparatus       |
| amp          | AMP                                                            | 5'-AMP, 5'-Adenosine monophosphate, 5'-Adenylic acid, Adenosine 5'-monophosphate, Adenosine 5'-phosphate, Adenylate, Adenylic acid                                         | C10H12NSO7P     | -2     | Lysosome              |
| amp          | AMP                                                            | 5'-AMP, 5'-Adenosine monophosphate, 5'-Adenylic acid, Adenosine 5'-monophosphate, Adenosine 5'-phosphate, Adenylate, Adenylic acid                                         | C10H12NSO7P     | -2     | Mitochondria          |
| amp          | AMP                                                            | 5'-AMP, 5'-Adenosine monophosphate, 5'-Adenylic acid, Adenosine 5'-monophosphate, Adenosine 5'-phosphate, Adenylate, Adenylic acid                                         | C10H12NSO7P     | -2     | Endoplasmic Reticulum |
| amp          | AMP                                                            | 5'-AMP, 5'-Adenosine monophosphate, 5'-Adenylic acid, Adenosine 5'-monophosphate, Adenosine 5'-phosphate, Adenylate, Adenylic acid                                         | C10H12NSO7P     | -2     | Peroxisome            |
| amuco        | 2-Aminomuconate                                                | 2-Aminomuconic acid, o-Aminomuconate                                                                                                                                       | C6H6NO4         | -1     | Cytosol               |
| andrstandn   | androstanedione                                                | 5beta-Androstane-3,17-dione                                                                                                                                                | C19H28O2        | 0      | Endoplasmic Reticulum |
| andrstdn     | Androstenedione                                                | 4-Androstene-3,17-dione, Androst-4-ene-3,17-dione                                                                                                                          | C19H26O2        | 0      | Endoplasmic Reticulum |
| andrstm      | Androsterone                                                   | 3alpha-Hydroxy-5alpha-androstan-17-one                                                                                                                                     | C19H30O2        | 0      | Cytosol               |
| andrstm      | Androsterone                                                   | 3alpha-Hydroxy-5alpha-androstan-17-one                                                                                                                                     | C19H30O2        | 0      | Extracellular         |
| andrstm      | Androsterone                                                   | 3alpha-Hydroxy-5alpha-androstan-17-one                                                                                                                                     | C19H30O2        | 0      | Endoplasmic Reticulum |
| andrstmglc   | androsterone glucuronide                                       |                                                                                                                                                                            | C25H38O8        | 0      | Cytosol               |
| andrstmglc   | androsterone glucuronide                                       |                                                                                                                                                                            | C25H38O8        | 0      | Extracellular         |
| andrstmglc   | androsterone glucuronide                                       |                                                                                                                                                                            | C25H38O8        | 0      | Endoplasmic Reticulum |
| anth         | Anthraniolate                                                  | 2-Aminobenzoate, Anthranilic acid, Vitamin L, Vitamin L1, o-Aminobenzoic acid                                                                                              | C7H6NO2         | -1     | Cytosol               |
| antipyrene   | antipyrene                                                     | Analgesine, Anodynine, Antipirin, Antipyrin, Apirelina, Parodyne, Phenazon [MeSH: pyrazon], Phenazone [MeSH: Antipyrine], Phenazonum, antipyrine [MeSH: Antipyrine]        | C11H12N2O       | 0      | Cytosol               |
| antipyrene   | antipyrene                                                     | Analgesine, Anodynine, Antipirin, Antipyrin, Apirelina, Parodyne, Phenazon [MeSH: pyrazon], Phenazone [MeSH: Antipyrine], Phenazonum, antipyrine [MeSH: Antipyrine]        | C11H12N2O       | 0      | Extracellular         |
| ap4a         | P1,P4-Bis(5'-adenosyl) tetraphosphate                          | AppppA                                                                                                                                                                     | C20H24N10O19P4  | -4     | Cytosol               |
| apnnox       | alpha-Pinene-oxide                                             | alpha-Pinene-oxide                                                                                                                                                         | C10H16O         | 0      | Cytosol               |
| apnnox       | alpha-Pinene-oxide                                             | alpha-Pinene-oxide                                                                                                                                                         | C10H16O         | 0      | Extracellular         |
| apoC         | Apocboxylase (no lys residue)                                  |                                                                                                                                                                            | XH              | 0      | Cytosol               |
| apoC         | Apocboxylase (no lys residue)                                  |                                                                                                                                                                            | XH              | 0      | Mitochondria          |
| apoC-Lys     | Apocboxylase (Lys residue)                                     |                                                                                                                                                                            | C6H13N2OX       | 0      | Cytosol               |
| apoC-Lys     | Apocboxylase (Lys residue)                                     |                                                                                                                                                                            | C6H13N2OX       | 0      | Mitochondria          |
| apoC-Lys_btn | Holocarboxylase (biotin covalent bound to Lys residue of apoC) |                                                                                                                                                                            | C16H27N4O3SX    | 0      | Cytosol               |
| apoC-Lys_btn | Holocarboxylase (biotin covalent bound to Lys residue of apoC) |                                                                                                                                                                            | C16H27N4O3SX    | 0      | Mitochondria          |
| appnn        | (+)-alpha-Pinene                                               | (+)-alpha-Pinene                                                                                                                                                           | C10H16          | 0      | Cytosol               |
| appnn        | (+)-alpha-Pinene                                               | (+)-alpha-Pinene                                                                                                                                                           | C10H16          | 0      | Extracellular         |
| aprgstm      | 20alpha-Hydroxyprogesterone                                    | 20(S)-Hydroxyprogesterone, 20alpha-Dihydroprogesterone, 20alpha-Hydroxy-4-pregnen-3-one, 20alpha-Hydroxypregn-4-en-3-one, 20alpha-Hydroxyprogesterone, Progesterol-20alpha | C21H32O2        | 0      | Cytosol               |
| aprgstm      | 20alpha-Hydroxyprogesterone                                    | 20(S)-Hydroxyprogesterone, 20alpha-Dihydroprogesterone, 20alpha-Hydroxy-4-pregnen-3-one, 20alpha-Hydroxypregn-4-en-3-one, 20alpha-Hydroxyprogesterone, Progesterol-20alpha | C21H32O2        | 0      | Extracellular         |
| aprut        | N-Acetylputrescine                                             |                                                                                                                                                                            | C6H15N2O        | 1      | Cytosol               |
| aps          | Adenosine 5'-phosphosulfate                                    | APS, Adenylylsulfate                                                                                                                                                       | C10H12NSO10PS   | -2     | Cytosol               |
| aqcobal      | Aquacob(III)alamin                                             | Aquacobalamin                                                                                                                                                              | C62H93CoN13O15P | 0      | Cytosol               |
| aqcobal      | Aquacob(III)alamin                                             | Aquacobalamin                                                                                                                                                              | C62H93CoN13O15P | 0      | Extracellular         |

| Abbreviation  | Metabolite Name                                          | Synonyms                                                                                                                                                             | Formula        | Charge | Compartment           |
|---------------|----------------------------------------------------------|----------------------------------------------------------------------------------------------------------------------------------------------------------------------|----------------|--------|-----------------------|
| arab-L        | L-Arabinose                                              |                                                                                                                                                                      | C5H10O5        | 0      | Cytosol               |
| arab-L        | L-Arabinose                                              |                                                                                                                                                                      | C5H10O5        | 0      | Extracellular         |
| arach         | Arachidic acid                                           | Arachidic acid, Eicosanoic acid, Icosanoic acid                                                                                                                      | C20H39O2       | -1     | Cytosol               |
| arach         | Arachidic acid                                           | Arachidic acid, Eicosanoic acid, Icosanoic acid                                                                                                                      | C20H39O2       | -1     | Extracellular         |
| arachcoa      | arachidyl coenzyme A                                     |                                                                                                                                                                      | C41H70N7O17P3S | -4     | Cytosol               |
| arachcoa      | arachidyl coenzyme A                                     |                                                                                                                                                                      | C41H70N7O17P3S | -4     | Mitochondria          |
| arachcoa      | arachidyl coenzyme A                                     |                                                                                                                                                                      | C41H70N7O17P3S | -4     | Peroxisome            |
| arachcrn      | arachidyl carnitine                                      | arachidic acid - carnitine                                                                                                                                           | C27H53NO4      | 0      | Cytosol               |
| arachcrn      | arachidyl carnitine                                      | arachidic acid - carnitine                                                                                                                                           | C27H53NO4      | 0      | Mitochondria          |
| arachd        | arachidonic acid                                         | (5Z,8Z,11Z,14Z)-Icosatetraenoic acid, Arachidonate, Arachidonic acid, cis-5,8,11,14-Eicosatetraenoic acid, eicosanoate 20:4                                          | C20H31O2       | -1     | Cytosol               |
| arachd        | arachidonic acid                                         | (5Z,8Z,11Z,14Z)-Icosatetraenoic acid, Arachidonate, Arachidonic acid, cis-5,8,11,14-Eicosatetraenoic acid, eicosanoate 20:4                                          | C20H31O2       | -1     | Extracellular         |
| arachd        | arachidonic acid                                         | (5Z,8Z,11Z,14Z)-Icosatetraenoic acid, Arachidonate, Arachidonic acid, cis-5,8,11,14-Eicosatetraenoic acid, eicosanoate 20:4                                          | C20H31O2       | -1     | Endoplasmic Reticulum |
| arachdcoa     | C20:4-CoA                                                | Arachidonyl-CoA, arachidonate CoA, arachidonic acid Coenzyme A                                                                                                       | C41H62N7O17P3S | -4     | Cytosol               |
| arachdcoa     | C20:4-CoA                                                | Arachidonyl-CoA, arachidonate CoA, arachidonic acid Coenzyme A                                                                                                       | C41H62N7O17P3S | -4     | Mitochondria          |
| arachdcoa     | C20:4-CoA                                                | Arachidonyl-CoA, arachidonate CoA, arachidonic acid Coenzyme A                                                                                                       | C41H62N7O17P3S | -4     | Peroxisome            |
| arachdcrn     | C20:4 carnitine                                          | Arachidonate carnitine                                                                                                                                               | C27H45NO4      | 0      | Cytosol               |
| arachdcrn     | C20:4 carnitine                                          | Arachidonate carnitine                                                                                                                                               | C27H45NO4      | 0      | Mitochondria          |
| arg-D         | D-Arginine                                               | D-2-Amino-5-guanidinovaleric acid                                                                                                                                    | C6H15N4O2      | 1      | Peroxisome            |
| arg-L         | L-Arginine                                               | (S)-2-Amino-5-guanidinovaleric acid, Arg, Arginine                                                                                                                   | C6H15N4O2      | 1      | Cytosol               |
| arg-L         | L-Arginine                                               | (S)-2-Amino-5-guanidinovaleric acid, Arg, Arginine                                                                                                                   | C6H15N4O2      | 1      | Extracellular         |
| arg-L         | L-Arginine                                               | (S)-2-Amino-5-guanidinovaleric acid, Arg, Arginine                                                                                                                   | C6H15N4O2      | 1      | Mitochondria          |
| argsuc        | N(omega)-(L-Arginino)succinate                           | L-Argininosuccinate, L-Argininosuccinic acid, L-Argininosuccinic acid, N-(L-Arginino)succinate                                                                       | C10H17N4O6     | -1     | Cytosol               |
| ascb-L        | L-Ascorbate                                              | Ascorbate, Ascorbic acid, L-Ascorbic acid, Vitamin C                                                                                                                 | C6H8O6         | 0      | Cytosol               |
| ascb-L        | L-Ascorbate                                              | Ascorbate, Ascorbic acid, L-Ascorbic acid, Vitamin C                                                                                                                 | C6H8O6         | 0      | Extracellular         |
| asn-L         | L-Asparagine                                             | 2-Amino-3-carbamoylpropanoic acid, 2-Aminosuccinamic acid, Arg                                                                                                       | C4H8N2O3       | 0      | Cytosol               |
| asn-L         | L-Asparagine                                             | 2-Amino-3-carbamoylpropanoic acid, 2-Aminosuccinamic acid, Arg                                                                                                       | C4H8N2O3       | 0      | Extracellular         |
| asn-L         | L-Asparagine                                             | 2-Amino-3-carbamoylpropanoic acid, 2-Aminosuccinamic acid, Arg                                                                                                       | C4H8N2O3       | 0      | Mitochondria          |
| Asn-X-Ser/Thr | protein-linked asparagine residue (N-glycosylation site) |                                                                                                                                                                      | XH             | 0      | Lysosome              |
| Asn-X-Ser/Thr | protein-linked asparagine residue (N-glycosylation site) |                                                                                                                                                                      | XH             | 0      | Endoplasmic Reticulum |
| asp-D         | D-Aspartate                                              | D-2-Aminobutanedioic acid, D-Aspartic acid                                                                                                                           | C4H6NO4        | -1     | Cytosol               |
| asp-D         | D-Aspartate                                              | D-2-Aminobutanedioic acid, D-Aspartic acid                                                                                                                           | C4H6NO4        | -1     | Extracellular         |
| asp-D         | D-Aspartate                                              | D-2-Aminobutanedioic acid, D-Aspartic acid                                                                                                                           | C4H6NO4        | -1     | Peroxisome            |
| asp-L         | L-Aspartate                                              | 2-aminosuccinic acid, Asp, L-Aspartic acid                                                                                                                           | C4H6NO4        | -1     | Cytosol               |
| asp-L         | L-Aspartate                                              | 2-aminosuccinic acid, Asp, L-Aspartic acid                                                                                                                           | C4H6NO4        | -1     | Extracellular         |
| asp-L         | L-Aspartate                                              | 2-aminosuccinic acid, Asp, L-Aspartic acid                                                                                                                           | C4H6NO4        | -1     | Mitochondria          |
| atp           | ATP                                                      | 5'-adenylate triphosphate, Adenosine 5'-triphosphate                                                                                                                 | C10H12NSO13P3  | -4     | Cytosol               |
| atp           | ATP                                                      | 5'-adenylate triphosphate, Adenosine 5'-triphosphate                                                                                                                 | C10H12NSO13P3  | -4     | Extracellular         |
| atp           | ATP                                                      | 5'-adenylate triphosphate, Adenosine 5'-triphosphate                                                                                                                 | C10H12NSO13P3  | -4     | Mitochondria          |
| atp           | ATP                                                      | 5'-adenylate triphosphate, Adenosine 5'-triphosphate                                                                                                                 | C10H12NSO13P3  | -4     | Nucleus               |
| atp           | ATP                                                      | 5'-adenylate triphosphate, Adenosine 5'-triphosphate                                                                                                                 | C10H12NSO13P3  | -4     | Endoplasmic Reticulum |
| atp           | ATP                                                      | 5'-adenylate triphosphate, Adenosine 5'-triphosphate                                                                                                                 | C10H12NSO13P3  | -4     | Peroxisome            |
| avite1        | alpha-Tocopherol                                         | Aquasol E, Ephanyl, Eprolin, Esorb, Pheryl-E, Phytoergmine, Vita plus E, Vita plus Ealpha-Tocopherol, Viteolin, Waynecomycin                                         | C29H50O2       | 0      | Cytosol               |
| avite1        | alpha-Tocopherol                                         | Aquasol E, Ephanyl, Eprolin, Esorb, Pheryl-E, Phytoergmine, Vita plus E, Vita plus Ealpha-Tocopherol, Viteolin, Waynecomycin                                         | C29H50O2       | 0      | Extracellular         |
| avite2        | alpha-Tocotrienol                                        | 1721-51-3, 2H-1-Benzopyran-6-ol, 3,4-dihydro-2,5,7,8-tetramethyl-2-(4,8,12-trimethyl-3,7,11-tridecatrienyl)-, CHEMID001721513, Tocotrienol, alpha, zeta 1-Tocopherol | C29H44O2       | 0      | Cytosol               |

| Abbreviation | Metabolite Name                             | Synonyms                                                                                                                                                                                                                                                                                                      | Formula        | Charge | Compartment           |
|--------------|---------------------------------------------|---------------------------------------------------------------------------------------------------------------------------------------------------------------------------------------------------------------------------------------------------------------------------------------------------------------|----------------|--------|-----------------------|
| avite2       | alpha-Tocotrienol                           | 1721-51-3, 2H-1-Benzopyran-6-ol, 3,4-dihydro-2,5,7,8-tetramethyl-2-(4,8,12-trimethyl-3,7,11-tridecatrienyl)-, CHEMID001721513, Tocotrienol, alpha, zeta1-Tocopherol                                                                                                                                           | C29H44O2       | 0      | Extracellular         |
| b2coa        | Crotonoyl-CoA                               | 2-Butenoyl-CoA, But-2-enoyl-CoA, Crotonyl-CoA, trans-But-2-enoyl-CoA                                                                                                                                                                                                                                          | C25H36N7O17P3S | -4     | Mitochondria          |
| b2coa        | Crotonoyl-CoA                               | 2-Butenoyl-CoA, But-2-enoyl-CoA, Crotonyl-CoA, trans-But-2-enoyl-CoA                                                                                                                                                                                                                                          | C25H36N7O17P3S | -4     | Peroxisome            |
| bampald      | beta-Aminopropion aldehyde                  |                                                                                                                                                                                                                                                                                                               | C3H8NO         | 1      | Cytosol               |
| bampald      | beta-Aminopropion aldehyde                  |                                                                                                                                                                                                                                                                                                               | C3H8NO         | 1      | Mitochondria          |
| bdg2hc       | cis-beta-D-Glucosyl-2-hydroxycinnamate      | beta-D-Glucosyl-2-coumarinate                                                                                                                                                                                                                                                                                 | C15H18O8       | 0      | Cytosol               |
| betald       | Betaine aldehyde                            |                                                                                                                                                                                                                                                                                                               | C5H12NO        | 1      | Cytosol               |
| betald       | Betaine aldehyde                            |                                                                                                                                                                                                                                                                                                               | C5H12NO        | 1      | Mitochondria          |
| bhb          | (R)-3-Hydroxybutanoate                      | (R)-3-Hydroxybutanoic acid, (R)-3-Hydroxybutyric acid, 3-hydroxybutyrate                                                                                                                                                                                                                                      | C4H7O3         | -1     | Cytosol               |
| bhb          | (R)-3-Hydroxybutanoate                      | (R)-3-Hydroxybutanoic acid, (R)-3-Hydroxybutyric acid, 3-hydroxybutyrate                                                                                                                                                                                                                                      | C4H7O3         | -1     | Extracellular         |
| bhb          | (R)-3-Hydroxybutanoate                      | (R)-3-Hydroxybutanoic acid, (R)-3-Hydroxybutyric acid, 3-hydroxybutyrate                                                                                                                                                                                                                                      | C4H7O3         | -1     | Mitochondria          |
| bilgclcur    | Bilirubin beta-digluconide                  | Bilirubin bis-gluconoside                                                                                                                                                                                                                                                                                     | C45H50N4O18    | -2     | Cytosol               |
| bilgclcur    | Bilirubin beta-digluconide                  | Bilirubin bis-gluconoside                                                                                                                                                                                                                                                                                     | C45H50N4O18    | -2     | Extracellular         |
| bilgclcur    | Bilirubin beta-digluconide                  | Bilirubin bis-gluconoside                                                                                                                                                                                                                                                                                     | C45H50N4O18    | -2     | Endoplasmic Reticulum |
| bilglcur     | Bilirubin monogluconide                     | Bilirubin-gluconoside                                                                                                                                                                                                                                                                                         | C39H44N4O12    | 0      | Cytosol               |
| bilglcur     | Bilirubin monogluconide                     | Bilirubin-gluconoside                                                                                                                                                                                                                                                                                         | C39H44N4O12    | 0      | Extracellular         |
| bilglcur     | Bilirubin monogluconide                     | Bilirubin-gluconoside                                                                                                                                                                                                                                                                                         | C39H44N4O12    | 0      | Endoplasmic Reticulum |
| bilirub      | Bilirubin                                   |                                                                                                                                                                                                                                                                                                               | C33H34N4O6     | -2     | Cytosol               |
| bilirub      | Bilirubin                                   |                                                                                                                                                                                                                                                                                                               | C33H34N4O6     | -2     | Extracellular         |
| bilirub      | Bilirubin                                   |                                                                                                                                                                                                                                                                                                               | C33H34N4O6     | -2     | Endoplasmic Reticulum |
| biliverd     | Biliverdin                                  |                                                                                                                                                                                                                                                                                                               | C33H32N4O6     | -2     | Cytosol               |
| biocyt       | Biocytin                                    | N6-D-Biotinyl-L-lysine, epsilon-N-Biotinyl-L-lysine                                                                                                                                                                                                                                                           | C16H28N4O4S    | 0      | Cytosol               |
| biocyt       | Biocytin                                    | N6-D-Biotinyl-L-lysine, epsilon-N-Biotinyl-L-lysine                                                                                                                                                                                                                                                           | C16H28N4O4S    | 0      | Extracellular         |
| biocyt       | Biocytin                                    | N6-D-Biotinyl-L-lysine, epsilon-N-Biotinyl-L-lysine                                                                                                                                                                                                                                                           | C16H28N4O4S    | 0      | Mitochondria          |
| biocyt       | Biocytin                                    | N6-D-Biotinyl-L-lysine, epsilon-N-Biotinyl-L-lysine                                                                                                                                                                                                                                                           | C16H28N4O4S    | 0      | Nucleus               |
| btamp        | Biotinyl-5'-AMP                             |                                                                                                                                                                                                                                                                                                               | C20H27N7O9PS   | -1     | Cytosol               |
| btamp        | Biotinyl-5'-AMP                             |                                                                                                                                                                                                                                                                                                               | C20H27N7O9PS   | -1     | Mitochondria          |
| btcoa        | Butanoyl-CoA                                | Butyryl-CoA                                                                                                                                                                                                                                                                                                   | C25H38N7O17P3S | -4     | Mitochondria          |
| btn          | Biotin                                      | Coenzyme R, D-Biotin, Vitamin B7, Vitamin H                                                                                                                                                                                                                                                                   | C10H15N2O3S    | -1     | Cytosol               |
| btn          | Biotin                                      | Coenzyme R, D-Biotin, Vitamin B7, Vitamin H                                                                                                                                                                                                                                                                   | C10H15N2O3S    | -1     | Extracellular         |
| btn          | Biotin                                      | Coenzyme R, D-Biotin, Vitamin B7, Vitamin H                                                                                                                                                                                                                                                                   | C10H15N2O3S    | -1     | Mitochondria          |
| btn          | Biotin                                      | Coenzyme R, D-Biotin, Vitamin B7, Vitamin H                                                                                                                                                                                                                                                                   | C10H15N2O3S    | -1     | Nucleus               |
| but          | Butyrate (n-C4:0)                           | Butanoate, Butanoic acid, Butyric acid                                                                                                                                                                                                                                                                        | C4H7O2         | -1     | Cytosol               |
| but          | Butyrate (n-C4:0)                           | Butanoate, Butanoic acid, Butyric acid                                                                                                                                                                                                                                                                        | C4H7O2         | -1     | Extracellular         |
| but          | Butyrate (n-C4:0)                           | Butanoate, Butanoic acid, Butyric acid                                                                                                                                                                                                                                                                        | C4H7O2         | -1     | Mitochondria          |
| bvite        | beta-tocopherol                             | 148-03-8, 2H-1-Benzopyran-6-ol, 3,4-dihydro-2,5,8-trimethyl-2-((4R,8R)-4,8,12-trimethyltridecyl)-, (2R)-rel-, 2H-1-Benzopyran-6-ol, 3,4-dihydro-2,5,8-trimethyl-2-(4,8,12-trimethyltridecyl)-, 3,4-Dihydro-2,5,8-trimethyl-2-(4,8,12-trimethyltridecyl)-2H-benzopyran-6-ol, CHEMID000148038, EINECS 205-708-5 | C28H48O2       | 0      | Cytosol               |
| bvite        | beta-tocopherol                             | 148-03-8, 2H-1-Benzopyran-6-ol, 3,4-dihydro-2,5,8-trimethyl-2-((4R,8R)-4,8,12-trimethyltridecyl)-, (2R)-rel-, 2H-1-Benzopyran-6-ol, 3,4-dihydro-2,5,8-trimethyl-2-(4,8,12-trimethyltridecyl)-, 3,4-Dihydro-2,5,8-trimethyl-2-(4,8,12-trimethyltridecyl)-2H-benzopyran-6-ol, CHEMID000148038, EINECS 205-708-5 | C28H48O2       | 0      | Extracellular         |
| bz           | Benzoate                                    | Benzenecarboxylic acid, Benzoic acid, Dracylic acid, Phenylformic acid                                                                                                                                                                                                                                        | C7H5O2         | -1     | Cytosol               |
| bz           | Benzoate                                    | Benzenecarboxylic acid, Benzoic acid, Dracylic acid, Phenylformic acid                                                                                                                                                                                                                                        | C7H5O2         | -1     | Extracellular         |
| bz           | Benzoate                                    | Benzenecarboxylic acid, Benzoic acid, Dracylic acid, Phenylformic acid                                                                                                                                                                                                                                        | C7H5O2         | -1     | Endoplasmic Reticulum |
| c226coa      | cervonyl coenzyme A                         | C226-CoA, Docosahexaenoic acid coenzyme a, cervonic acid coenzyme a, docosa-4,7,10,13,16,19-hexaenoic acid coenzyme a                                                                                                                                                                                         | C43H62N7O17P3S | -4     | Cytosol               |
| c226coa      | cervonyl coenzyme A                         | C226-CoA, Docosahexaenoic acid coenzyme a, cervonic acid coenzyme a, docosa-4,7,10,13,16,19-hexaenoic acid coenzyme a                                                                                                                                                                                         | C43H62N7O17P3S | -4     | Mitochondria          |
| c226coa      | cervonyl coenzyme A                         | C226-CoA, Docosahexaenoic acid coenzyme a, cervonic acid coenzyme a, docosa-4,7,10,13,16,19-hexaenoic acid coenzyme a                                                                                                                                                                                         | C43H62N7O17P3S | -4     | Peroxisome            |
| c226cm       | cervonyl carnitine                          | cervonic acid carnitine                                                                                                                                                                                                                                                                                       | C29H45NO4      | 0      | Cytosol               |
| c226cm       | cervonyl carnitine                          | cervonic acid carnitine                                                                                                                                                                                                                                                                                       | C29H45NO4      | 0      | Mitochondria          |
| c2m26dcoa    | cis-2-Methyl-5-isopropylhexa-2,5-dienyl-CoA |                                                                                                                                                                                                                                                                                                               | C31H46N7O17P3S | -4     | Mitochondria          |
| c2m26dcoa    | cis-2-Methyl-5-isopropylhexa-2,5-dienyl-CoA |                                                                                                                                                                                                                                                                                                               | C31H46N7O17P3S | -4     | Peroxisome            |

| Abbreviation | Metabolite Name                                                | Synonyms                                                                                                                           | Formula                            | Charge | Compartment           |
|--------------|----------------------------------------------------------------|------------------------------------------------------------------------------------------------------------------------------------|------------------------------------|--------|-----------------------|
| ca2          | Calcium                                                        | Ca <sup>2+</sup>                                                                                                                   | Ca                                 | 2      | Cytosol               |
| ca2          | Calcium                                                        | Ca <sup>2+</sup>                                                                                                                   | Ca                                 | 2      | Extracellular         |
| cala         | N-Carbamoyl-beta-alanine                                       | 3-Ureidopropionate, 3-Ureidopropionate, beta-Ureidopropionic acid                                                                  | C4H7N2O3                           | -1     | Cytosol               |
| camp         | cAMP                                                           | 3',5'-Cyclic AMP, Adenosine 3[-5]-cyclic monophosphate, Cyclic adenylic acid                                                       | C10H11NSO6P                        | -1     | Cytosol               |
| camp         | cAMP                                                           | 3',5'-Cyclic AMP, Adenosine 3[-5]-cyclic monophosphate, Cyclic adenylic acid                                                       | C10H11NSO6P                        | -1     | Extracellular         |
| camp         | cAMP                                                           | 3',5'-Cyclic AMP, Adenosine 3[-5]-cyclic monophosphate, Cyclic adenylic acid                                                       | C10H11NSO6P                        | -1     | Golgi Apparatus       |
| carn         | L-Carnosine                                                    | L-Carnosine, Nalpha-(beta-alanyl)-L-histidine                                                                                      | C9H14N4O3                          | 0      | Cytosol               |
| caro         | beta-Carotene                                                  |                                                                                                                                    | C40H56                             | 0      | Cytosol               |
| caro         | beta-Carotene                                                  |                                                                                                                                    | C40H56                             | 0      | Extracellular         |
| carveol      | (E)-carveol                                                    | (-)-trans-Carveol, (E)-carveol                                                                                                     | C10H16O                            | 0      | Cytosol               |
| carveol      | (E)-carveol                                                    | (-)-trans-Carveol, (E)-carveol                                                                                                     | C10H16O                            | 0      | Extracellular         |
| chasp        | N-Carbamoyl-L-aspartate                                        |                                                                                                                                    | C5H6N2O5                           | -2     | Cytosol               |
| chl1         | Cob(I)alamin                                                   | Chl, Vitamin B12s                                                                                                                  | C62H88CoN13O14P                    | -1     | Mitochondria          |
| chl2         | Cob(II)alamin                                                  | Vitamin B12r                                                                                                                       | C62H92CoN13O14P                    | 0      | Cytosol               |
| chl2         | Cob(II)alamin                                                  | Vitamin B12r                                                                                                                       | C62H92CoN13O14P                    | 0      | Mitochondria          |
| chp          | Carbamoyl phosphate                                            |                                                                                                                                    | CH2NO5P                            | -2     | Cytosol               |
| chp          | Carbamoyl phosphate                                            |                                                                                                                                    | CH2NO5P                            | -2     | Mitochondria          |
| chp          | Carbamoyl phosphate                                            |                                                                                                                                    | CH2NO5P                            | -2     | Endoplasmic Reticulum |
| cca_d3       | Calcitric acid (D3)                                            | 1alpha(OH)-23-carboxy-24,25,26,27-tetranor-D3                                                                                      | C22H33O4                           | -1     | Cytosol               |
| cca_d3       | Calcitric acid (D3)                                            | 1alpha(OH)-23-carboxy-24,25,26,27-tetranor-D3                                                                                      | C22H33O4                           | -1     | Extracellular         |
| cca_d3       | Calcitric acid (D3)                                            | 1alpha(OH)-23-carboxy-24,25,26,27-tetranor-D3                                                                                      | C22H33O4                           | -1     | Mitochondria          |
| cdp          | CDP                                                            | Cytidine 5'-diphosphate, Cytidine diphosphate                                                                                      | C9H12N3O11P2                       | 3      | Cytosol               |
| cdp          | CDP                                                            | Cytidine 5'-diphosphate, Cytidine diphosphate                                                                                      | C9H12N3O11P2                       | -3     | Mitochondria          |
| cdp          | CDP                                                            | Cytidine 5'-diphosphate, Cytidine diphosphate                                                                                      | C9H12N3O11P2                       | -3     | Nucleus               |
| cdpchol      | CDPcholine                                                     | Cytidine 5'-diphosphocholine                                                                                                       | C14H25N4O11P2                      | -1     | Cytosol               |
| edpdag_hs    | CDP diacylglycerol (homo sapiens)                              | CDP-diacylglycerol                                                                                                                 | C12H17N3O11P2FULLRCO2FU<br>LLR2CO2 | -2     | Cytosol               |
| edpdag_hs    | CDP diacylglycerol (homo sapiens)                              | CDP-diacylglycerol                                                                                                                 | C12H17N3O11P2FULLRCO2FU<br>LLR2CO2 | -2     | Mitochondria          |
| cdpea        | CDPethanolamine                                                |                                                                                                                                    | C11H19N4O11P2                      | -1     | Cytosol               |
| egly         | Cys-Gly                                                        | L-Cysteinylglycine                                                                                                                 | C5H10N2O3S                         | 0      | Cytosol               |
| egly         | Cys-Gly                                                        | L-Cysteinylglycine                                                                                                                 | C5H10N2O3S                         | 0      | Extracellular         |
| chito2pdol_L | N,N'-Diacylchitobiosyldiphosphodolichol, human liver homolog   | Chitobiosyldiphosphodolichol                                                                                                       | C1240H2028N20O170P20               | -20    | Cytosol               |
| chito2pdol_U | N,N'-Diacylchitobiosyldiphosphodolichol, human uterine homolog | Chitobiosyldiphosphodolichol                                                                                                       | C1185H1940N20O170P20               | -20    | Cytosol               |
| chlstol      | Cholesta-7,24-dien-3beta-ol                                    | Cholesta-7,24-dien-3beta-ol                                                                                                        | C27H44O                            | 0      | Endoplasmic Reticulum |
| chol         | Choline                                                        | Bilineurine                                                                                                                        | C5H14NO                            | 1      | Cytosol               |
| chol         | Choline                                                        | Bilineurine                                                                                                                        | C5H14NO                            | 1      | Extracellular         |
| chol         | Choline                                                        | Bilineurine                                                                                                                        | C5H14NO                            | 1      | Golgi Apparatus       |
| chol         | Choline                                                        | Bilineurine                                                                                                                        | C5H14NO                            | 1      | Mitochondria          |
| chol         | Choline                                                        | Bilineurine                                                                                                                        | C5H14NO                            | 1      | Nucleus               |
| chol         | Choline                                                        | Bilineurine                                                                                                                        | C5H14NO                            | 1      | Endoplasmic Reticulum |
| cholate      | Cholate                                                        | 12alpha-Trihydroxy-5beta-cholanate, 12alpha-Trihydroxy-5beta-cholamic acid, 3alpha, 7alpha, Chololic acid, bile acid               | C24H39O5                           | -1     | Cytosol               |
| cholate      | Cholate                                                        | 12alpha-Trihydroxy-5beta-cholanate, 12alpha-Trihydroxy-5beta-cholamic acid, 3alpha, 7alpha, Chololic acid, bile acid               | C24H39O5                           | -1     | Extracellular         |
| cholcoa      | Choloyl-CoA                                                    | 3-alpha-7-alpha-12-alpha-trihydroxy-5-beta-cholant-24-one-CoA, Choloyl-CoA                                                         | C45H70N7O20P3S                     | -4     | Peroxisome            |
| cholcoads    | 3alpha,7alpha,12alpha-Trihydroxy-5beta-cholest-24-enoyl-CoA    | 25(S)-3-alpha-7-alpha-12-alpha-trihydroxy-5-beta-cholest-24-enoyl-CoA, 3alpha,7alpha,12alpha-Trihydroxy-5beta-cholest-24-enoyl-CoA | C48H74N7O20P3S                     | -4     | Peroxisome            |
| cholcoaone   | 3alpha,7alpha,12alpha-Trihydroxy-5beta-24-oxocholestanoyl-CoA  | 3-alpha-7-alpha-12-alpha-trihydroxy-5-beta-cholest-24-one-CoA, 3alpha,7alpha,12alpha-Trihydroxy-5beta-24-oxocholestanoyl-CoA       | C48H74N7O21P3S                     | -4     | Peroxisome            |
| cholcoar     | 3alpha,7alpha,12alpha-Trihydroxy-5beta-cholestanoyl-CoA        | 25(R) 3-alpha-7-alpha-12-alpha-trihydroxy-5-beta-cholestanoyl-CoA, 3alpha,7alpha,12alpha-Trihydroxy-5beta-cholestanoyl-CoA         | C48H76N7O20P3S                     | -4     | Endoplasmic Reticulum |
| cholcoar     | 3alpha,7alpha,12alpha-Trihydroxy-5beta-cholestanoyl-CoA        | 25(R) 3-alpha-7-alpha-12-alpha-trihydroxy-5-beta-cholestanoyl-CoA, 3alpha,7alpha,12alpha-Trihydroxy-5beta-cholestanoyl-CoA         | C48H76N7O20P3S                     | -4     | Peroxisome            |
| cholcoas     | 3alpha,7alpha,12alpha-Trihydroxy-5beta-cholestanoyl-CoA(S)     | 25(S)-3-alpha-7-alpha-12-alpha-trihydroxy-5-beta-cholestanoyl-coa                                                                  | C48H76N7O20P3S                     | -4     | Endoplasmic Reticulum |
| cholcoas     | 3alpha,7alpha,12alpha-Trihydroxy-5beta-cholestanoyl-CoA(S)     | 25(S)-3-alpha-7-alpha-12-alpha-trihydroxy-5-beta-cholestanoyl-coa                                                                  | C48H76N7O20P3S                     | -4     | Peroxisome            |
| cholp        | Choline phosphate                                              | O-Phosphocholine, Phosphocholine, Phosphorylcholine                                                                                | C5H13NO4P                          | -1     | Cytosol               |
| cholp        | Choline phosphate                                              | O-Phosphocholine, Phosphocholine, Phosphorylcholine                                                                                | C5H13NO4P                          | -1     | Golgi Apparatus       |
| cholp        | Choline phosphate                                              | O-Phosphocholine, Phosphocholine, Phosphorylcholine                                                                                | C5H13NO4P                          | -1     | Lysosome              |

| Abbreviation | Metabolite Name                         | Synonyms                                                                                                                               | Formula                     | Charge | Compartment           |
|--------------|-----------------------------------------|----------------------------------------------------------------------------------------------------------------------------------------|-----------------------------|--------|-----------------------|
| chsterol     | Cholesterol                             | Cholest-5-en-3beta-ol                                                                                                                  | C27H46O                     | 0      | Cytosol               |
| chsterol     | Cholesterol                             | Cholest-5-en-3beta-ol                                                                                                                  | C27H46O                     | 0      | Extracellular         |
| chsterol     | Cholesterol                             | Cholest-5-en-3beta-ol                                                                                                                  | C27H46O                     | 0      | Golgi Apparatus       |
| chsterol     | Cholesterol                             | Cholest-5-en-3beta-ol                                                                                                                  | C27H46O                     | 0      | Lysosome              |
| chsterol     | Cholesterol                             | Cholest-5-en-3beta-ol                                                                                                                  | C27H46O                     | 0      | Mitochondria          |
| chsterol     | Cholesterol                             | Cholest-5-en-3beta-ol                                                                                                                  | C27H46O                     | 0      | Endoplasmic Reticulum |
| chsterols    | cholesterol sulfate                     |                                                                                                                                        | C27H45O4S                   | -1     | Cytosol               |
| chsterols    | cholesterol sulfate                     |                                                                                                                                        | C27H45O4S                   | -1     | Endoplasmic Reticulum |
| chtn         | chitin                                  | beta-1,4-poly-N-acetyl-D-glucosamine                                                                                                   | C24H41N3O16                 | 0      | Cytosol               |
| chtn         | chitin                                  | beta-1,4-poly-N-acetyl-D-glucosamine                                                                                                   | C24H41N3O16                 | 0      | Extracellular         |
| cit          | Citrate                                 | 2, 2-Hydroxy-1, 2-Hydroxytricarballic acid, 3-propanetricarboxylic acid, Citric acid                                                   | C6H5O7                      | -3     | Cytosol               |
| cit          | Citrate                                 | 2, 2-Hydroxy-1, 2-Hydroxytricarballic acid, 3-propanetricarboxylic acid, Citric acid                                                   | C6H5O7                      | -3     | Extracellular         |
| cit          | Citrate                                 | 2, 2-Hydroxy-1, 2-Hydroxytricarballic acid, 3-propanetricarboxylic acid, Citric acid                                                   | C6H5O7                      | -3     | Mitochondria          |
| citmcoa-L    | L-Citramalyl-CoA                        | (3S)-Citramalyl-CoA                                                                                                                    | C26H37N7O20P3S              | -5     | Mitochondria          |
| citrl-L      | L-Citrulline                            | 2-Amino-5-ureidovaleric acid, Citrulline, N5-(aminocarbonyl)-L-Ornithine                                                               | C6H13N3O3                   | 0      | Cytosol               |
| citrl-L      | L-Citrulline                            | 2-Amino-5-ureidovaleric acid, Citrulline, N5-(aminocarbonyl)-L-Ornithine                                                               | C6H13N3O3                   | 0      | Mitochondria          |
| cl           | Chloride                                | Cl-                                                                                                                                    | Cl                          | -1     | Cytosol               |
| cl           | Chloride                                | Cl-                                                                                                                                    | Cl                          | -1     | Extracellular         |
| clpn_hs      | cardiolipin (homo sapiens)              |                                                                                                                                        | C9H1609P2FULLR2CO2FULLR2CO2 | -2     | Cytosol               |
| clpnd        | clupanodonic acid                       | docosa-7,10,13,16,19-pentaenoic acid, docosapentaenoic acid (n-3)                                                                      | C22H33O2                    | -1     | Cytosol               |
| clpnd        | clupanodonic acid                       | docosa-7,10,13,16,19-pentaenoic acid, docosapentaenoic acid (n-3)                                                                      | C22H33O2                    | -1     | Extracellular         |
| clpndcoa     | clupanodonyl CoA                        | clupanodonyl Coenzyme A, docosa-7,10,13,16,19-pentaenoyl coenzyme A                                                                    | C43H64N7O17P3S              | 4      | Cytosol               |
| clpndcoa     | clupanodonyl CoA                        | clupanodonyl Coenzyme A, docosa-7,10,13,16,19-pentaenoyl coenzyme A                                                                    | C43H64N7O17P3S              | 4      | Mitochondria          |
| clpndcoa     | clupanodonyl CoA                        | clupanodonyl Coenzyme A, docosa-7,10,13,16,19-pentaenoyl coenzyme A                                                                    | C43H64N7O17P3S              | 4      | Peroxisome            |
| clpndcrn     | clupanodonyl carnitine                  |                                                                                                                                        | C29H47NO4                   | 0      | Cytosol               |
| clpndcrn     | clupanodonyl carnitine                  |                                                                                                                                        | C29H47NO4                   | 0      | Mitochondria          |
| cmp          | CMP                                     | 3'-Cytidylic Acid, Cytidine-2'(3')-monophosphoric acid, Cytidine-2[(3)]-monophosphoric acid, Cytidine-5'-monophosphate, Cytidylic acid | C9H12N3O8P                  | -2     | Cytosol               |
| cmp          | CMP                                     | 3'-Cytidylic Acid, Cytidine-2'(3')-monophosphoric acid, Cytidine-2[(3)]-monophosphoric acid, Cytidine-5'-monophosphate, Cytidylic acid | C9H12N3O8P                  | -2     | Extracellular         |
| cmp          | CMP                                     | 3'-Cytidylic Acid, Cytidine-2'(3')-monophosphoric acid, Cytidine-2[(3)]-monophosphoric acid, Cytidine-5'-monophosphate, Cytidylic acid | C9H12N3O8P                  | -2     | Golgi Apparatus       |
| cmp          | CMP                                     | 3'-Cytidylic Acid, Cytidine-2'(3')-monophosphoric acid, Cytidine-2[(3)]-monophosphoric acid, Cytidine-5'-monophosphate, Cytidylic acid | C9H12N3O8P                  | -2     | Lysosome              |
| cmp          | CMP                                     | 3'-Cytidylic Acid, Cytidine-2'(3')-monophosphoric acid, Cytidine-2[(3)]-monophosphoric acid, Cytidine-5'-monophosphate, Cytidylic acid | C9H12N3O8P                  | -2     | Mitochondria          |
| cmp          | CMP                                     | 3'-Cytidylic Acid, Cytidine-2'(3')-monophosphoric acid, Cytidine-2[(3)]-monophosphoric acid, Cytidine-5'-monophosphate, Cytidylic acid | C9H12N3O8P                  | -2     | Nucleus               |
| cmp2amep     | CMP-2-aminoethylphosphonate             | CMPciliatine                                                                                                                           | C11H19N4O10P2               | -1     | Cytosol               |
| cmpacna      | CMP-N-acetylneuraminate                 | CMP-Neu5Ac                                                                                                                             | C20H29N4O16P                | -2     | Cytosol               |
| cmpacna      | CMP-N-acetylneuraminate                 | CMP-Neu5Ac                                                                                                                             | C20H29N4O16P                | -2     | Golgi Apparatus       |
| cmpacna      | CMP-N-acetylneuraminate                 | CMP-Neu5Ac                                                                                                                             | C20H29N4O16P                | -2     | Nucleus               |
| cmpntm2amep  | CMP-N-trimethyl-2-aminoethylphosphonate | CMP-2-trimethylaminoethylphosphonate                                                                                                   | C14H25N4O10P2               | -1     | Cytosol               |
| cmusa        | 2-Amino-3-carboxymuconate semialdehyde  |                                                                                                                                        | C7H6NO5                     | -1     | Cytosol               |
| co           | Carbon monoxide                         |                                                                                                                                        | CO                          | 0      | Cytosol               |
| co           | Carbon monoxide                         |                                                                                                                                        | CO                          | 0      | Extracellular         |
| co2          | CO2                                     | Carbon dioxide, Carbonic anhydride                                                                                                     | CO2                         | 0      | Cytosol               |
| co2          | CO2                                     | Carbon dioxide, Carbonic anhydride                                                                                                     | CO2                         | 0      | Extracellular         |
| co2          | CO2                                     | Carbon dioxide, Carbonic anhydride                                                                                                     | CO2                         | 0      | Golgi Apparatus       |
| co2          | CO2                                     | Carbon dioxide, Carbonic anhydride                                                                                                     | CO2                         | 0      | Mitochondria          |
| co2          | CO2                                     | Carbon dioxide, Carbonic anhydride                                                                                                     | CO2                         | 0      | Nucleus               |
| co2          | CO2                                     | Carbon dioxide, Carbonic anhydride                                                                                                     | CO2                         | 0      | Endoplasmic Reticulum |
| co2          | CO2                                     | Carbon dioxide, Carbonic anhydride                                                                                                     | CO2                         | 0      | Peroxisome            |
| coa          | Coenzyme A                              | CoA, CoA-SH, CoASH                                                                                                                     | C21H32N7O16P3S              | -4     | Cytosol               |
| coa          | Coenzyme A                              | CoA, CoA-SH, CoASH                                                                                                                     | C21H32N7O16P3S              | -4     | Golgi Apparatus       |
| coa          | Coenzyme A                              | CoA, CoA-SH, CoASH                                                                                                                     | C21H32N7O16P3S              | -4     | Lysosome              |
| coa          | Coenzyme A                              | CoA, CoA-SH, CoASH                                                                                                                     | C21H32N7O16P3S              | -4     | Mitochondria          |
| coa          | Coenzyme A                              | CoA, CoA-SH, CoASH                                                                                                                     | C21H32N7O16P3S              | -4     | Nucleus               |
| coa          | Coenzyme A                              | CoA, CoA-SH, CoASH                                                                                                                     | C21H32N7O16P3S              | -4     | Endoplasmic Reticulum |
| coa          | Coenzyme A                              | CoA, CoA-SH, CoASH                                                                                                                     | C21H32N7O16P3S              | -4     | Peroxisome            |
| coke         | cocaine                                 | beta-Cocain, 1-Cocain                                                                                                                  | C17H21NO4                   | 0      | Endoplasmic Reticulum |



| Abbreviation | Metabolite Name          | Synonyms                                                                                                                                                                                                                                                            | Formula           | Charge | Compartment           |
|--------------|--------------------------|---------------------------------------------------------------------------------------------------------------------------------------------------------------------------------------------------------------------------------------------------------------------|-------------------|--------|-----------------------|
| core2        | Core 2                   | beta-D-Galactosyl-1,3-(N-acetyl-beta-D-glucosaminy-1,6)-N-acetyl-D-galactosaminy-R                                                                                                                                                                                  | C22H37N2O15X      | 0      | Golgi Apparatus       |
| core3        | Core 3                   | N-Acetyl-beta-D-glucosaminy-1,3-N-acetyl-D-galactosaminy-R                                                                                                                                                                                                          | C16H27N2O10X      | 0      | Golgi Apparatus       |
| core4        | Core 4                   | N-Acetyl-beta-D-glucosaminy-1,6-(N-acetyl-beta-glucosaminy-1,3)-N-acetyl-D-galactosaminy-R                                                                                                                                                                          | C24H40N3O15X      | 0      | Golgi Apparatus       |
| core5        | Core 5                   |                                                                                                                                                                                                                                                                     | C16H27N2O10X      | 0      | Golgi Apparatus       |
| core6        | Core 6                   |                                                                                                                                                                                                                                                                     | C16H27N2O10X      | 0      | Golgi Apparatus       |
| core6        | Core 6                   |                                                                                                                                                                                                                                                                     | C16H27N2O10X      | 0      | Lysosome              |
| core7        | Core 7                   |                                                                                                                                                                                                                                                                     | C16H27N2O10X      | 0      | Golgi Apparatus       |
| core8        | Core 8                   |                                                                                                                                                                                                                                                                     | C14H24NO10X       | 0      | Golgi Apparatus       |
| cortsn       | Cortisone                | 11, 17alpha, 20-trione, 21-Dihydroxy-4-pregnene-3, Kendall's compound E, Reichstein's substance F                                                                                                                                                                   | C21H28O5          | 0      | Endoplasmic Reticulum |
| coucoa       | p-coumaroyl-CoA          | 4-Coumaroyl-CoA, 4-Hydroxycinnamoyl-CoA                                                                                                                                                                                                                             | C30H38N7O18P3S1   | -4     | Mitochondria          |
| coumarin     | coumarin                 | 1,2-Benzopyrone, 2-Propenoic acid, 3-(2-hydroxyphenyl)-, d-lactone, 2H-1-Benzopyran-2-one, 5,6-Benzo-2-pyrone, Benzo-a-pyrone, Coumarine, Coumarinic anhydride, Coumarin, Rattex, Tonka bean camphor, cis-o-Coumarinic acid lactone, o-Hydroxycinnamic acid lactone | C9H6O2            | 0      | Cytosol               |
| coumarin     | coumarin                 | 1,2-Benzopyrone, 2-Propenoic acid, 3-(2-hydroxyphenyl)-, d-lactone, 2H-1-Benzopyran-2-one, 5,6-Benzo-2-pyrone, Benzo-a-pyrone, Coumarine, Coumarinic anhydride, Coumarin, Rattex, Tonka bean camphor, cis-o-Coumarinic acid lactone, o-Hydroxycinnamic acid lactone | C9H6O2            | 0      | Extracellular         |
| cp3          | Coproporphyrinogen III   |                                                                                                                                                                                                                                                                     | C36H40N4O8        | -4     | Cytosol               |
| creat        | Creatine                 | Methylglycocyanine, alpha-Methylguanidino acetic acid                                                                                                                                                                                                               | C4H9N3O2          | 0      | Cytosol               |
| creat        | Creatine                 | Methylglycocyanine, alpha-Methylguanidino acetic acid                                                                                                                                                                                                               | C4H9N3O2          | 0      | Extracellular         |
| creat        | Creatine                 | Methylglycocyanine, alpha-Methylguanidino acetic acid                                                                                                                                                                                                               | C4H9N3O2          | 0      | Mitochondria          |
| crm_hs       | ceramide (homo sapiens)  | Ceramide, N-Acylsphingosine                                                                                                                                                                                                                                         | C18H36NO2FULLRCO  | 0      | Cytosol               |
| crm_hs       | ceramide (homo sapiens)  | Ceramide, N-Acylsphingosine                                                                                                                                                                                                                                         | C18H36NO2FULLRCO  | 0      | Golgi Apparatus       |
| crm_hs       | ceramide (homo sapiens)  | Ceramide, N-Acylsphingosine                                                                                                                                                                                                                                         | C18H36NO2FULLRCO  | 0      | Lysosome              |
| crm_hs       | ceramide (homo sapiens)  | Ceramide, N-Acylsphingosine                                                                                                                                                                                                                                         | C18H36NO2FULLRCO  | 0      | Endoplasmic Reticulum |
| crmp_hs      | Ceramide 1-phosphate     | Ceramide 1-phosphate, Ceramide phosphate                                                                                                                                                                                                                            | C18H35NO5PFULLRCO | -2     | Cytosol               |
| crmp_hs      | Ceramide 1-phosphate     | Ceramide 1-phosphate, Ceramide phosphate                                                                                                                                                                                                                            | C18H35NO5PFULLRCO | -2     | Extracellular         |
| cm           | L-Carnitine              | (S)-Carnitine, 3-Carboxy-2-hydroxy-N, L-gamma-Trimethyl-beta-hydroxybutyrobetaine, N-trimethyl-1-propanaminium, Vitamin BT                                                                                                                                          | C7H15NO3          | 0      | Cytosol               |
| cm           | L-Carnitine              | (S)-Carnitine, 3-Carboxy-2-hydroxy-N, L-gamma-Trimethyl-beta-hydroxybutyrobetaine, N-trimethyl-1-propanaminium, Vitamin BT                                                                                                                                          | C7H15NO3          | 0      | Extracellular         |
| cm           | L-Carnitine              | (S)-Carnitine, 3-Carboxy-2-hydroxy-N, L-gamma-Trimethyl-beta-hydroxybutyrobetaine, N-trimethyl-1-propanaminium, Vitamin BT                                                                                                                                          | C7H15NO3          | 0      | Mitochondria          |
| cm           | L-Carnitine              | (S)-Carnitine, 3-Carboxy-2-hydroxy-N, L-gamma-Trimethyl-beta-hydroxybutyrobetaine, N-trimethyl-1-propanaminium, Vitamin BT                                                                                                                                          | C7H15NO3          | 0      | Endoplasmic Reticulum |
| cm           | L-Carnitine              | (S)-Carnitine, 3-Carboxy-2-hydroxy-N, L-gamma-Trimethyl-beta-hydroxybutyrobetaine, N-trimethyl-1-propanaminium, Vitamin BT                                                                                                                                          | C7H15NO3          | 0      | Peroxisome            |
| crn          | Creatinine               | 1-Methylglycocyanidine                                                                                                                                                                                                                                              | C4H7N3O           | 0      | Cytosol               |
| crtsl        | Cortisol                 | 11beta, 17alpha, 20-dione, 21-Trihydroxy-4-pregnene-3, Hydrocortisone, Kendall's compound H, Reichstein's substance M                                                                                                                                               | C21H30O5          | 0      | Cytosol               |
| crtsl        | Cortisol                 | 11beta, 17alpha, 20-dione, 21-Trihydroxy-4-pregnene-3, Hydrocortisone, Kendall's compound H, Reichstein's substance M                                                                                                                                               | C21H30O5          | 0      | Mitochondria          |
| crtsl        | Cortisol                 | 11beta, 17alpha, 20-dione, 21-Trihydroxy-4-pregnene-3, Hydrocortisone, Kendall's compound H, Reichstein's substance M                                                                                                                                               | C21H30O5          | 0      | Endoplasmic Reticulum |
| crtrsn       | Corticosterone           | 11beta, 21-Dihydroxy-4-pregnene-3,20-dione, Kendall's compound B, Reichstein's substance H                                                                                                                                                                          | C21H30O4          | 0      | Cytosol               |
| crtrsn       | Corticosterone           | 11beta, 21-Dihydroxy-4-pregnene-3,20-dione, Kendall's compound B, Reichstein's substance H                                                                                                                                                                          | C21H30O4          | 0      | Mitochondria          |
| crtrsn       | Corticosterone           | 11beta, 21-Dihydroxy-4-pregnene-3,20-dione, Kendall's compound B, Reichstein's substance H                                                                                                                                                                          | C21H30O4          | 0      | Endoplasmic Reticulum |
| crvnc        | cervonic acid, C22:6 n-3 | DHE, Docosahexaenoic acid, docosa-4,7,10,13,16,19-hexaenoic acid                                                                                                                                                                                                    | C22H31O2          | -1     | Cytosol               |
| crvnc        | cervonic acid, C22:6 n-3 | DHE, Docosahexaenoic acid, docosa-4,7,10,13,16,19-hexaenoic acid                                                                                                                                                                                                    | C22H31O2          | -1     | Extracellular         |

| Abbreviation  | Metabolite Name                                                                                    | Synonyms                                                        | Formula        | Charge | Compartment     |
|---------------|----------------------------------------------------------------------------------------------------|-----------------------------------------------------------------|----------------|--------|-----------------|
| cs_hs_linkage | chondroitin sulfate/heparan sulfate linkage region (GlcA-(Gal)2-Xyl-L-Ser (protein))               |                                                                 | C23H36O20X     | -1     | Golgi Apparatus |
| cs_a          | chondroitin sulfate A (GalNAc4S-GlcA), free chain                                                  | (GalNAc4S-GlcA)2-Gal4S-Gal-Xyl                                  | C45H67N2O46S3  | 5      | Lysosome        |
| cs_a,b,e_pre1 | chondroitin sulfate A (GalNAc4S-GlcA), B (IdoA2S-GalNAc4S), and E (GalNAc4,6diS-GlcA), precursor 1 | GalNAc4S-GlcA-Gal4S-Gal-Xyl-L-Ser (protein)                     | C31H47NO31S2X  | -3     | Golgi Apparatus |
| cs_a,b_pre2   | chondroitin sulfate A (GalNAc4S-GlcA) and B (IdoA2S-GalNAc4S), precursor 2                         | GlcA-GalNAc4S-GlcA-Gal4S-Gal-Xyl-L-Ser                          | C37H54NO37S2X  | -4     | Golgi Apparatus |
| cs_a,b_pre3   | chondroitin sulfate A (GalNAc4S-GlcA) and B (IdoA2S-GalNAc4S), precursor 3                         | GalNAc-GlcA-GalNAc4S-GlcA-Gal4S-Gal-Xyl-L-Ser                   | C45H67N2O42S2X | -4     | Golgi Apparatus |
| cs_a_deg1     | chondroitin sulfate A (GalNAc4S-GlcA), degradation product 1                                       | GalNAc-GlcA-GalNAc4S-GlcA-Gal4S-Gal-Xyl                         | C45H68N2O43S2  | -4     | Lysosome        |
| cs_a_deg2     | chondroitin sulfate A (GalNAc4S-GlcA), degradation product 2                                       | GlcA-GalNAc4S-GlcA-Gal4S-Gal-Xyl                                | C37H55NO38S2   | -4     | Lysosome        |
| cs_a_deg3     | chondroitin sulfate A (GalNAc4S-GlcA), degradation product 3                                       | GalNAc4S-GlcA-Gal4S-Gal-Xyl                                     | C31H48NO32S2   | -3     | Lysosome        |
| cs_a_deg4     | chondroitin sulfate A (GalNAc4S-GlcA), degradation product 4                                       | GalNAc-GlcA-Gal4S-Gal-Xyl                                       | C31H49NO29S    | -2     | Lysosome        |
| cs_a_deg5     | chondroitin sulfate A (GalNAc4S-GlcA), degradation product 5                                       | GlcA-Gal4S-Gal-Xyl                                              | C23H36O24S     | -2     | Lysosome        |
| cs_b          | chondroitin sulfate B / dermatan sulfate (IdoA2S-GalNAc4S), free chain                             | GalNAc4S-IdoA2S-GalNAc4S-GlcA-Gal4S-Gal-Xyl                     | C45H66N2O49S4  | -6     | Lysosome        |
| cs_b_deg1     | chondroitin sulfate B / dermatan sulfate (IdoA2S-GalNAc4S), degradation product 1                  | GalNAc-IdoA2S-GalNAc4S-GlcA-Gal4S-Gal-Xyl                       | C45H67N2O46S3  | -5     | Lysosome        |
| cs_b_deg2     | chondroitin sulfate B / dermatan sulfate (IdoA2S-GalNAc4S), degradation product 2                  | IdoA2S-GalNAc4S-GlcA-Gal4S-Gal-Xyl                              | C37H54NO41S3   | -5     | Lysosome        |
| cs_b_deg3     | chondroitin sulfate B / dermatan sulfate (IdoA2S-GalNAc4S), degradation product 3                  | IdoA-GalNAc4S-GlcA-Gal4S-Gal-Xyl                                | C37H55NO38S2   | -4     | Lysosome        |
| cs_b_pre4     | chondroitin sulfate B (IdoA2S-GalNAc4S), precursor 4                                               | GalNAc-IdoA-GalNAc4S-GlcA-Gal4S-Gal-Xyl-L-Ser                   | C45H67N2O42S2X | 4      | Golgi Apparatus |
| cs_b_pre5     | chondroitin sulfate B (IdoA2S-GalNAc4S), precursor 5                                               |                                                                 | C45H66N2O45S3X | -5     | Golgi Apparatus |
| cs_c          | chondroitin sulfate C (GalNAc6S-GlcA), free chain                                                  | (GalNAc6S-GlcA)2-Gal6S-Gal-Xyl                                  | C45H67N2O46S3  | 5      | Lysosome        |
| cs_c,d,e_pre1 | chondroitin sulfate C (GalNAc6S-GlcA) and D (GlcNAc6S-GlcA2S), precursor 1                         | GalNAc6S-GlcA-Gal6S-Gal-Xyl-L-Ser (protein)                     | C31H47NO31S2X  | -3     | Golgi Apparatus |
| cs_c_deg1     | chondroitin sulfate C (GalNAc6S-GlcA), degradation product 1                                       | GalNAc-GlcA-GalNAc6S-GlcA-Gal6S-Gal-Xyl                         | C45H68N2O43S2  | -4     | Lysosome        |
| cs_c_deg2     | chondroitin sulfate C (GalNAc6S-GlcA), degradation product 2                                       | GlcA-GalNAc6S-GlcA-Gal6S-Gal-Xyl                                | C37H55NO38S2   | -4     | Lysosome        |
| cs_c_deg3     | chondroitin sulfate C (GalNAc6S-GlcA), degradation product 3                                       | GalNAc6S-GlcA-Gal6S-Gal-Xyl                                     | C31H48NO32S2   | -3     | Lysosome        |
| cs_c_deg4     | chondroitin sulfate C (GalNAc6S-GlcA), degradation product 4                                       | GalNAc-GlcA-Gal6S-Gal-Xyl                                       | C31H49NO29S    | -2     | Lysosome        |
| cs_c_deg5     | chondroitin sulfate C (GalNAc6S-GlcA), degradation product 5                                       | GlcA-Gal6S-Gal-Xyl                                              | C23H36O24S     | -2     | Lysosome        |
| cs_c_pre2     | chondroitin sulfate C (GalNAc6S-GlcA), precursor 2                                                 | GlcA-GalNAc6S-GlcA-Gal6S-Gal-Xyl-L-Ser (protein)                | C37H54NO37S2X  | 4      | Golgi Apparatus |
| cs_c_pre3     | chondroitin sulfate C (GalNAc6S-GlcA), precursor 3                                                 | GalNAc-GlcA-GalNAc6S-GlcA-Gal6S-Gal-Xyl-L-Ser (protein)         | C45H67N2O42S2X | 4      | Golgi Apparatus |
| cs_d          | chondroitin sulfate D (GlcNAc6S-GlcA2S), free chain                                                | (GalNAc6S-GlcA2S)2-Gal6S-Gal-Xyl                                | C45H65N2O52S5  | -7     | Lysosome        |
| cs_d_deg1     | chondroitin sulfate D (GlcNAc6S-GlcA2S), degradation product 1                                     | GalNAc-GlcA2S-GalNAc6S-GlcA2S-Gal6S-Gal-Xyl                     | C45H66N2O49S4  | -6     | Lysosome        |
| cs_d_deg2     | chondroitin sulfate D (GlcNAc6S-GlcA2S), degradation product 2                                     | GlcA2S-GalNAc6S-GlcA2S-Gal6S-Gal-Xyl                            | C37H53NO44S4   | -6     | Lysosome        |
| cs_d_deg3     | chondroitin sulfate D (GlcNAc6S-GlcA2S), degradation product 3                                     | GlcA-GalNAc6S-GlcA2S-Gal6S-Gal-Xyl                              | C37H54NO41S3   | -5     | Lysosome        |
| cs_d_deg4     | chondroitin sulfate D (GlcNAc6S-GlcA2S), degradation product 4                                     | GalNAc6S-GlcA2S-Gal6S-Gal-Xyl                                   | C31H47NO35S3   | -4     | Lysosome        |
| cs_d_deg5     | chondroitin sulfate D (GlcNAc6S-GlcA2S), degradation product 5                                     | GalNAc-GlcA2S-Gal6S-Gal-Xyl                                     | C31H48NO32S2   | -3     | Lysosome        |
| cs_d_deg6     | chondroitin sulfate D (GlcNAc6S-GlcA2S), degradation product 6                                     | GlcA2S-Gal6S-Gal-Xyl                                            | C23H35O27S2    | -3     | Lysosome        |
| cs_d_pre2     | chondroitin sulfate D (GlcNAc6S-GlcA2S) precursor 2                                                | GalNAc6S-GlcA2S-Gal6S-Gal-Xyl-L-Ser (protein)                   | C31H46NO34S3X  | -4     | Golgi Apparatus |
| cs_d_pre3     | chondroitin sulfate D (GlcNAc6S-GlcA2S), precursor 3                                               | GlcA-GalNAc6S-GlcA2S-Gal6S-Gal-Xyl-L-Ser (protein)              | C37H53NO40S3X  | -5     | Golgi Apparatus |
| cs_d_pre4     | chondroitin sulfate D (GlcNAc6S-GlcA2S), precursor 4                                               | GalNAc-GlcA-GalNAc6S-GlcA2S-Gal6S-Gal-Xyl-L-Ser (protein)       | C45H66N2O45S3X | -5     | Golgi Apparatus |
| cs_d_pre5     | chondroitin sulfate D (GlcNAc6S-GlcA2S), precursor 5                                               | GalNAc6S-GlcA-GalNAc6S-GlcA2S-Gal6S-Gal-Xyl-L-Ser (protein)     | C45H65N2O48S4X | -6     | Golgi Apparatus |
| cs_e          | chondroitin sulfate E (GalNAc4,6diS-GlcA), free chain                                              | (GalNAc4,6diS-GlcA)2-Gal4,6diS-Gal-Xyl                          | C45H64N2O55S6  | -8     | Lysosome        |
| cs_e_deg1     | chondroitin sulfate E (GalNAc4,6diS-GlcA), degradation product 1                                   | GalNAc6S-GlcA-GalNAc4,6diS-GlcA-Gal4,6diS-Gal-Xyl               | C45H65N2O52S5  | -7     | Lysosome        |
| cs_e_deg2     | chondroitin sulfate E (GalNAc4,6diS-GlcA), degradation product 2                                   | GalNAc-GlcA-GalNAc4,6diS-GlcA-Gal4,6diS-Gal-Xyl                 | C45H66N2O49S4  | -6     | Lysosome        |
| cs_e_deg3     | chondroitin sulfate E (GalNAc4,6diS-GlcA), degradation product 3                                   | GlcA-GalNAc4,6diS-GlcA-Gal4,6diS-Gal-Xyl                        | C37H53NO44S4   | -6     | Lysosome        |
| cs_e_deg4     | chondroitin sulfate E (GalNAc4,6diS-GlcA), degradation product 4                                   | GalNAc4,6diS-GlcA-Gal4,6diS-Gal-Xyl                             | C31H46NO38S4   | -5     | Lysosome        |
| cs_e_deg5     | chondroitin sulfate E (GalNAc4,6diS-GlcA), degradation product 5                                   | GalNAc6S-GlcA-Gal4,6diS-Gal-Xyl                                 | C31H47NO35S3   | -4     | Lysosome        |
| cs_e_deg6     | chondroitin sulfate E (GalNAc4,6diS-GlcA), degradation product 6                                   | GalNAc-GlcA-Gal4,6diS-Gal-Xyl                                   | C31H48NO32S2   | -3     | Lysosome        |
| cs_e_deg7     | chondroitin sulfate E (GalNAc4,6diS-GlcA), degradation product 7                                   | GlcA-Gal4,6diS-Gal-Xyl                                          | C23H35O27S2    | -3     | Lysosome        |
| cs_e_pre2     | chondroitin sulfate E (GalNAc4,6diS-GlcA), precursor 2                                             | GalNAc4,6diS-GlcA-Gal4,6diS-Gal-Xyl-L-Ser (protein)             | C31H45NO37S4X  | -5     | Golgi Apparatus |
| cs_e_pre3     | chondroitin sulfate E (GalNAc4,6diS-GlcA), precursor 3                                             | GlcA-GalNAc4,6diS-GlcA-Gal4,6diS-Gal-Xyl-L-Ser (protein)        | C37H52NO43S4X  | -6     | Golgi Apparatus |
| cs_e_pre4     | chondroitin sulfate E (GalNAc4,6diS-GlcA), precursor 4                                             | GalNAc-GlcA-GalNAc4,6diS-GlcA-Gal4,6diS-Gal-Xyl-L-Ser (protein) | C45H65N2O48S4X | -6     | Golgi Apparatus |

| Abbreviation | Metabolite Name                                                           | Synonyms                                                                                                             | Formula                | Charge | Compartment           |
|--------------|---------------------------------------------------------------------------|----------------------------------------------------------------------------------------------------------------------|------------------------|--------|-----------------------|
| es_e_pre5a   | chondroitin sulfate E (GalNAc4,6diS-GlcA), precursor 5a                   | GalNAc4S-GlcA-GalNAc4,6diS-GlcA-Gal4,6diS-Gal-Xyl-L-Ser (protein)                                                    | C45H64N2O51S5X         | -7     | Golgi Apparatus       |
| es_e_pre5b   | chondroitin sulfate E (GalNAc4,6diS-GlcA), precursor 5b                   | GalNAc6S-GlcA-GalNAc4,6diS-GlcA-Gal4,6diS-Gal-Xyl-L-Ser (protein)                                                    | C45H64N2O51S5X         | -7     | Golgi Apparatus       |
| es_pre       | chondroitin sulfate precursor (GalNAc-GlcA-(Gal)2-Xyl-L-Ser (protein))    | GalNAc-GlcA-(Gal)2-Xyl-L-Ser (protein)                                                                               | C31H49NO25X            | -1     | Golgi Apparatus       |
| esn          | Cytosine                                                                  |                                                                                                                      | C4H5N3O                | 0      | Cytosol               |
| esn          | Cytosine                                                                  |                                                                                                                      | C4H5N3O                | 0      | Extracellular         |
| espg_a       | chondroitin sulfate A (GalNAc4S-GlcA) proteoglycan                        | (GalNAc4S-GlcA)2-Gal4S-Gal-Xyl-L-Ser (protein)                                                                       | C45H66N2O45S3X         | -5     | Extracellular         |
| espg_a       | chondroitin sulfate A (GalNAc4S-GlcA) proteoglycan                        | (GalNAc4S-GlcA)2-Gal4S-Gal-Xyl-L-Ser (protein)                                                                       | C45H66N2O45S3X         | -5     | Golgi Apparatus       |
| espg_a       | chondroitin sulfate A (GalNAc4S-GlcA) proteoglycan                        | (GalNAc4S-GlcA)2-Gal4S-Gal-Xyl-L-Ser (protein)                                                                       | C45H66N2O45S3X         | -5     | Lysosome              |
| espg_b       | chondroitin sulfate B / dermatan sulfate (IdoA2S-GalNAc4S-proteoglycan)   | GalNAc4S-IdoA2S-GalNAc4S-GlcA-Gal4S-Gal-Xyl-L-Ser                                                                    | C45H65N2O48S4X         | -6     | Extracellular         |
| espg_b       | chondroitin sulfate B / dermatan sulfate (IdoA2S-GalNAc4S-proteoglycan)   | GalNAc4S-IdoA2S-GalNAc4S-GlcA-Gal4S-Gal-Xyl-L-Ser                                                                    | C45H65N2O48S4X         | -6     | Golgi Apparatus       |
| espg_b       | chondroitin sulfate B / dermatan sulfate (IdoA2S-GalNAc4S-proteoglycan)   | GalNAc4S-IdoA2S-GalNAc4S-GlcA-Gal4S-Gal-Xyl-L-Ser                                                                    | C45H65N2O48S4X         | -6     | Lysosome              |
| espg_c       | chondroitin sulfate C (GalNAc6S-GlcA) proteoglycan                        | (GalNAc6S-GlcA)2-Gal6S-Gal-Xyl-L-Ser (protein)                                                                       | C45H66N2O45S3X         | -5     | Extracellular         |
| espg_c       | chondroitin sulfate C (GalNAc6S-GlcA) proteoglycan                        | (GalNAc6S-GlcA)2-Gal6S-Gal-Xyl-L-Ser (protein)                                                                       | C45H66N2O45S3X         | -5     | Golgi Apparatus       |
| espg_c       | chondroitin sulfate C (GalNAc6S-GlcA) proteoglycan                        | (GalNAc6S-GlcA)2-Gal6S-Gal-Xyl-L-Ser (protein)                                                                       | C45H66N2O45S3X         | -5     | Lysosome              |
| espg_d       | chondroitin sulfate D (GlcNAc6S-GlcA2S) proteoglycan                      | (GalNAc6S-GlcA2S)2-Gal6S-Gal-Xyl-L-Ser (protein)                                                                     | C45H64N2O51S5X         | -7     | Extracellular         |
| espg_d       | chondroitin sulfate D (GlcNAc6S-GlcA2S) proteoglycan                      | (GalNAc6S-GlcA2S)2-Gal6S-Gal-Xyl-L-Ser (protein)                                                                     | C45H64N2O51S5X         | -7     | Golgi Apparatus       |
| espg_d       | chondroitin sulfate D (GlcNAc6S-GlcA2S) proteoglycan                      | (GalNAc6S-GlcA2S)2-Gal6S-Gal-Xyl-L-Ser (protein)                                                                     | C45H64N2O51S5X         | -7     | Lysosome              |
| espg_e       | chondroitin sulfate E (GalNAc4,6diS-GlcA) proteoglycan                    | (GalNAc4,6diS-GlcA)2-Gal4,6diS-Gal-Xyl-L-Ser (protein)                                                               | C45H63N2O54S6X         | -8     | Extracellular         |
| espg_e       | chondroitin sulfate E (GalNAc4,6diS-GlcA) proteoglycan                    | (GalNAc4,6diS-GlcA)2-Gal4,6diS-Gal-Xyl-L-Ser (protein)                                                               | C45H63N2O54S6X         | -8     | Golgi Apparatus       |
| espg_e       | chondroitin sulfate E (GalNAc4,6diS-GlcA) proteoglycan                    | (GalNAc4,6diS-GlcA)2-Gal4,6diS-Gal-Xyl-L-Ser (protein)                                                               | C45H63N2O54S6X         | -8     | Lysosome              |
| etp          | CTP                                                                       | Cytidine 5'-triphosphate, Cytidine triphosphate                                                                      | C9H12N3O14P3           | -4     | Cytosol               |
| etp          | CTP                                                                       | Cytidine 5'-triphosphate, Cytidine triphosphate                                                                      | C9H12N3O14P3           | -4     | Mitochondria          |
| etp          | CTP                                                                       | Cytidine 5'-triphosphate, Cytidine triphosphate                                                                      | C9H12N3O14P3           | -4     | Nucleus               |
| eyan         | Hydrogen cyanide                                                          | CN-, Cyano                                                                                                           | CHN                    | 0      | Cytosol               |
| eyan         | Hydrogen cyanide                                                          | CN-, Cyano                                                                                                           | CHN                    | 0      | Extracellular         |
| eyan         | Hydrogen cyanide                                                          | CN-, Cyano                                                                                                           | CHN                    | 0      | Mitochondria          |
| eysam        | Cysteamine                                                                |                                                                                                                      | C2H8NS                 | 1      | Cytosol               |
| eys-L        | L-Cysteine                                                                | Cys, L-2-Amino-3-mercaptopropionic acid                                                                              | C3H7NO2S               | 0      | Cytosol               |
| eys-L        | L-Cysteine                                                                | Cys, L-2-Amino-3-mercaptopropionic acid                                                                              | C3H7NO2S               | 0      | Extracellular         |
| eys-L        | L-Cysteine                                                                | Cys, L-2-Amino-3-mercaptopropionic acid                                                                              | C3H7NO2S               | 0      | Mitochondria          |
| cyst-L       | L-Cystathionine                                                           |                                                                                                                      | C7H14N2O4S             | 0      | Cytosol               |
| eytd         | Cytidine                                                                  | 1-beta-ribofuranosyl-4-amino-1-beta-D-ribofuranosyl-2(1H)-pyrimidinone, cytosine riboside                            | C9H13N3O5              | 0      | Cytosol               |
| eytd         | Cytidine                                                                  | 1-beta-ribofuranosyl-4-amino-1-beta-D-ribofuranosyl-2(1H)-pyrimidinone, cytosine riboside                            | C9H13N3O5              | 0      | Extracellular         |
| eytd         | Cytidine                                                                  | 1-beta-ribofuranosyl-4-amino-1-beta-D-ribofuranosyl-2(1H)-pyrimidinone, cytosine riboside                            | C9H13N3O5              | 0      | Lysosome              |
| eytd         | Cytidine                                                                  | 1-beta-ribofuranosyl-4-amino-1-beta-D-ribofuranosyl-2(1H)-pyrimidinone, cytosine riboside                            | C9H13N3O5              | 0      | Mitochondria          |
| eytd         | Cytidine                                                                  | 1-beta-ribofuranosyl-4-amino-1-beta-D-ribofuranosyl-2(1H)-pyrimidinone, cytosine riboside                            | C9H13N3O5              | 0      | Nucleus               |
| dad-2        | Deoxyadenosine                                                            | 2'-Deoxyadenosine, dA                                                                                                | C10H13NSO3             | 0      | Cytosol               |
| dad-2        | Deoxyadenosine                                                            | 2'-Deoxyadenosine, dA                                                                                                | C10H13NSO3             | 0      | Extracellular         |
| dad-2        | Deoxyadenosine                                                            | 2'-Deoxyadenosine, dA                                                                                                | C10H13NSO3             | 0      | Lysosome              |
| dad-5        | 5'-Deoxyadenosine                                                         |                                                                                                                      | C10H13NSO3             | 0      | Extracellular         |
| dadp         | dADP                                                                      | 2'-Deoxyadenosine 5'-diphosphate                                                                                     | C10H12NSO9P2           | -3     | Cytosol               |
| dadp         | dADP                                                                      | 2'-Deoxyadenosine 5'-diphosphate                                                                                     | C10H12NSO9P2           | -3     | Mitochondria          |
| dadp         | dADP                                                                      | 2'-Deoxyadenosine 5'-diphosphate                                                                                     | C10H12NSO9P2           | -3     | Nucleus               |
| dag_hs       | diacylglycerol (homo sapiens)                                             |                                                                                                                      | C3H60FULLRCO2FULLR2CO2 | 0      | Cytosol               |
| dag_hs       | diacylglycerol (homo sapiens)                                             |                                                                                                                      | C3H60FULLRCO2FULLR2CO2 | 0      | Extracellular         |
| dag_hs       | diacylglycerol (homo sapiens)                                             |                                                                                                                      | C3H60FULLRCO2FULLR2CO2 | 0      | Nucleus               |
| dag_hs       | diacylglycerol (homo sapiens)                                             |                                                                                                                      | C3H60FULLRCO2FULLR2CO2 | 0      | Endoplasmic Reticulum |
| dak2gpe_hs   | 1-alkenyl 2-acylglycerol 3-phosphoethanolamine plasmalogen (homo sapiens) | plasmalogen                                                                                                          | C7H14O5NPFULLRFULLR2CO | 0      | Cytosol               |
| damp         | dAMP                                                                      | 2'-Deoxyadenosine 5'-monophosphate, 2'-Deoxyadenosine 5'-phosphate, Deoxyadenosine monophosphate, Deoxyadenylic acid | C10H12NSO6P            | -2     | Cytosol               |

| Abbreviation | Metabolite Name                           | Synonyms                                                                                                                                                                                                                      | Formula        | Charge | Compartment           |
|--------------|-------------------------------------------|-------------------------------------------------------------------------------------------------------------------------------------------------------------------------------------------------------------------------------|----------------|--------|-----------------------|
| damp         | dAMP                                      | 2'-Deoxyadenosine 5'-monophosphate, 2'-Deoxyadenosine 5'-phosphate, Deoxyadenosine monophosphate, Deoxyadenylic acid                                                                                                          | C10H12NSO6P    | -2     | Lysosome              |
| datp         | dATP                                      | 2'-Deoxyadenosine 5'-triphosphate, Deoxyadenosin 5'-triphosphate, Deoxyadenosine triphosphate                                                                                                                                 | C10H12NSO12P3  | -4     | Cytosol               |
| datp         | dATP                                      | 2'-Deoxyadenosine 5'-triphosphate, Deoxyadenosin 5'-triphosphate, Deoxyadenosine triphosphate                                                                                                                                 | C10H12NSO12P3  | -4     | Mitochondria          |
| datp         | dATP                                      | 2'-Deoxyadenosine 5'-triphosphate, Deoxyadenosin 5'-triphosphate, Deoxyadenosine triphosphate                                                                                                                                 | C10H12NSO12P3  | -4     | Nucleus               |
| dcacoa       | Decanoyl-CoA (n-C10:0CoA)                 |                                                                                                                                                                                                                               | C31H50N7O17P3S | -4     | Cytosol               |
| dcacoa       | Decanoyl-CoA (n-C10:0CoA)                 |                                                                                                                                                                                                                               | C31H50N7O17P3S | -4     | Peroxisome            |
| dcamp        | N6-(1,2-Dicarboxyethyl)-AMP               | Adenylosuccinate, Adenylosuccinic acid                                                                                                                                                                                        | C14H14NSO11P   | -4     | Cytosol               |
| dcdp         | dCDP                                      | 2'-Deoxycytidine 5'-diphosphate, 2'-Deoxycytidine diphosphate                                                                                                                                                                 | C9H12N3O10P2   | -3     | Cytosol               |
| dcdp         | dCDP                                      | 2'-Deoxycytidine 5'-diphosphate, 2'-Deoxycytidine diphosphate                                                                                                                                                                 | C9H12N3O10P2   | -3     | Mitochondria          |
| dcdp         | dCDP                                      | 2'-Deoxycytidine 5'-diphosphate, 2'-Deoxycytidine diphosphate                                                                                                                                                                 | C9H12N3O10P2   | -3     | Nucleus               |
| dcholcoa     | chenodeoxycholyol coenzyme a              | Chenodeoxycholyol-CoA, bile acid                                                                                                                                                                                              | C45H70N7O19P3S | -4     | Peroxisome            |
| dcmp         | dCMP                                      | 2'-Deoxycytidine 5'-monophosphate, Deoxycytidine monophosphate, Deoxycydidylate, Deoxycydidylic acid                                                                                                                          | C9H12N3O7P     | -2     | Cytosol               |
| dcmp         | dCMP                                      | 2'-Deoxycytidine 5'-monophosphate, Deoxycytidine monophosphate, Deoxycydidylate, Deoxycydidylic acid                                                                                                                          | C9H12N3O7P     | -2     | Lysosome              |
| dcmp         | dCMP                                      | 2'-Deoxycytidine 5'-monophosphate, Deoxycytidine monophosphate, Deoxycydidylate, Deoxycydidylic acid                                                                                                                          | C9H12N3O7P     | -2     | Mitochondria          |
| dcmp         | dCMP                                      | 2'-Deoxycytidine 5'-monophosphate, Deoxycytidine monophosphate, Deoxycydidylate, Deoxycydidylic acid                                                                                                                          | C9H12N3O7P     | -2     | Nucleus               |
| dcspn1       | docosa-4,7,10,13,16-pentaenoic acid (n-6) | (All-Z)-4,7,10,13,16-docosapentaenoic acid, 4,7,10,13,16-Docosapentaenoic acid, (all-Z)-, 4,7,10,13,16-Docosapentaenoic acid, (all-Z)-, docosa-4,7,10,13,16-pentaenoic acid                                                   | C22H33O2       | -1     | Cytosol               |
| dcspn1       | docosa-4,7,10,13,16-pentaenoic acid (n-6) | (All-Z)-4,7,10,13,16-docosapentaenoic acid, 4,7,10,13,16-Docosapentaenoic acid, (all-Z)-, 4,7,10,13,16-Docosapentaenoic acid, (all-Z)-, docosa-4,7,10,13,16-pentaenoic acid                                                   | C22H33O2       | -1     | Extracellular         |
| dcspn1coa    | docosa-4,7,10,13,16-pentaenoyl coenzyme A |                                                                                                                                                                                                                               | C43H64N7O17P3S | -4     | Cytosol               |
| dcspn1coa    | docosa-4,7,10,13,16-pentaenoyl coenzyme A |                                                                                                                                                                                                                               | C43H64N7O17P3S | -4     | Mitochondria          |
| dcspn1coa    | docosa-4,7,10,13,16-pentaenoyl coenzyme A |                                                                                                                                                                                                                               | C43H64N7O17P3S | -4     | Peroxisome            |
| dcspn1cm     | docosa-4,7,10,13,16-pentaenoyl carnitine  |                                                                                                                                                                                                                               | C29H47NO4      | 0      | Cytosol               |
| dcspn1cm     | docosa-4,7,10,13,16-pentaenoyl carnitine  |                                                                                                                                                                                                                               | C29H47NO4      | 0      | Mitochondria          |
| dctp         | dCTP                                      | 2'-Deoxycytidine 5'-triphosphate, Deoxycytidine 5' triphosphate, Deoxycytidine triphosphate                                                                                                                                   | C9H12N3O13P3   | -4     | Cytosol               |
| dctp         | dCTP                                      | 2'-Deoxycytidine 5'-triphosphate, Deoxycytidine 5' triphosphate, Deoxycytidine triphosphate                                                                                                                                   | C9H12N3O13P3   | -4     | Mitochondria          |
| dctp         | dCTP                                      | 2'-Deoxycytidine 5'-triphosphate, Deoxycytidine 5' triphosphate, Deoxycytidine triphosphate                                                                                                                                   | C9H12N3O13P3   | -4     | Nucleus               |
| dcyt         | Deoxycytidine                             | 2'-Deoxycytidine, dC                                                                                                                                                                                                          | C9H13N3O4      | 0      | Cytosol               |
| dcyt         | Deoxycytidine                             | 2'-Deoxycytidine, dC                                                                                                                                                                                                          | C9H13N3O4      | 0      | Extracellular         |
| dcyt         | Deoxycytidine                             | 2'-Deoxycytidine, dC                                                                                                                                                                                                          | C9H13N3O4      | 0      | Lysosome              |
| dcyt         | Deoxycytidine                             | 2'-Deoxycytidine, dC                                                                                                                                                                                                          | C9H13N3O4      | 0      | Mitochondria          |
| dcyt         | Deoxycytidine                             | 2'-Deoxycytidine, dC                                                                                                                                                                                                          | C9H13N3O4      | 0      | Nucleus               |
| dd2coa       | trans-Dodec-2-enoyl-CoA                   | 2-trans-Dodecenoyl-CoA                                                                                                                                                                                                        | C33H52N7O17P3S | -4     | Mitochondria          |
| dd3coa       | 3-dodecenoyl CoA                          | 3-cis-Dodecenoyl-CoA                                                                                                                                                                                                          | C33H52N7O17P3S | -4     | Mitochondria          |
| ddca         | Dodecanoate (n-C12:0)                     | Dodecanoic acid, Dodecylcarboxylate, Lauric acid                                                                                                                                                                              | C12H23O2       | -1     | Cytosol               |
| ddcaACP      | Dodecanoyl-ACP (n-C12:0ACP)               | Dodecanoyl-[acp], Dodecanoyl-[acyl-carrier protein], Fatty Acid C12 ACP, Lauroyl ACP                                                                                                                                          | C23H43N2O8PRS  | -1     | Cytosol               |
| ddcacoa      | Dodecanoyl-CoA (n-C12:0CoA)               | Lauroyl coenzyme A, Lauroyl-CoA                                                                                                                                                                                               | C33H54N7O17P3S | -4     | Cytosol               |
| ddcacoa      | Dodecanoyl-CoA (n-C12:0CoA)               | Lauroyl coenzyme A, Lauroyl-CoA                                                                                                                                                                                               | C33H54N7O17P3S | -4     | Peroxisome            |
| ddssterol    | 7-Dehydrodesmesterol                      | 7-Dehydrodesmesterol                                                                                                                                                                                                          | C27H42O        | 0      | Endoplasmic Reticulum |
| debrisoquine | debrisoquine                              | 2(1H)-Isoquinolinecarboximidamide, 3,4-dihydro-, 3,4-Dihydro-2(1H)-isoquinolinecarboximidine, 3,4-Dihydro-2(1H)-isoquinolinecarboximidamide, Debrisoquin [MeSH: Debrisoquin], Debrisoquine [MeSH: Debrisoquin], Isocaramidine | C10H14N3       | 1      | Cytosol               |
| debrisoquine | debrisoquine                              | 2(1H)-Isoquinolinecarboximidamide, 3,4-dihydro-, 3,4-Dihydro-2(1H)-isoquinolinecarboximidine, 3,4-Dihydro-2(1H)-isoquinolinecarboximidamide, Debrisoquin [MeSH: Debrisoquin], Debrisoquine [MeSH: Debrisoquin], Isocaramidine | C10H14N3       | 1      | Extracellular         |
| decdp        | all trans Decaprenyl diphosphate          |                                                                                                                                                                                                                               | C50H81O7P2     | -3     | Cytosol               |
| decdp        | all trans Decaprenyl diphosphate          |                                                                                                                                                                                                                               | C50H81O7P2     | -3     | Mitochondria          |
| dedol_L      | Dehydrodicolchol, human liver homolog     |                                                                                                                                                                                                                               | C1080H1748O10  | 0      | Cytosol               |
| dedol_U      | Dehydrodicolchol, human uterine homolog   |                                                                                                                                                                                                                               | C1025H1660O10  | 0      | Cytosol               |

| Abbreviation          | Metabolite Name                                                                                                    | Synonyms                                                                                                             | Formula                              | Charge | Compartment           |
|-----------------------|--------------------------------------------------------------------------------------------------------------------|----------------------------------------------------------------------------------------------------------------------|--------------------------------------|--------|-----------------------|
| dedoldp_L             | Dehydrodicolchol diphosphate, human liver homolog                                                                  | Dehydrodicolchyl diphosphate                                                                                         | C1080H1738O70P20                     | -30    | Cytosol               |
| dedoldp_U             | Dehydrodicolchol diphosphate, human uterine homolog                                                                |                                                                                                                      | C1025H1650O70P20                     | -30    | Cytosol               |
| dedolp_L              | Dehydrodicolchol phosphate, human liver homolog                                                                    |                                                                                                                      | C1080H1738O40P10                     | -20    | Cytosol               |
| dedolp_U              | Dehydrodicolchol phosphate, human uterine homolog                                                                  |                                                                                                                      | C1025H1650O40P10                     | -20    | Cytosol               |
| dem2emgacpail_prot_hs | deacylated-(phosphoethanolaminyldimannosyl)-(phosphoethanolaminyldimannosyl)-glucosaminyl-acylphosphatidylinositol | {[(Prot-PE-(Man)2],[PE])-Man-GlcN-PI                                                                                 | C37H70N3O34P3FULLR2CO2FU<br>LLR2CO2X | 0      | Endoplasmic Reticulum |
| dgchol                | Chenodeoxyglycocholate                                                                                             | Chenodeoxyglycocholate                                                                                               | C26H43NO5                            | 0      | Cytosol               |
| dgchol                | Chenodeoxyglycocholate                                                                                             | Chenodeoxyglycocholate                                                                                               | C26H43NO5                            | 0      | Extracellular         |
| dgchol                | Chenodeoxyglycocholate                                                                                             | Chenodeoxyglycocholate                                                                                               | C26H43NO5                            | 0      | Peroxisome            |
| dgcholcoa             | Chenodeoxyglycocholate-CoA                                                                                         | Chenodeoxyglycocholate-CoA                                                                                           | C45H70N7O19P3S                       | -4     | Peroxisome            |
| dgdp                  | dGDP                                                                                                               | 2'-Deoxyguanosine 5'-diphosphate                                                                                     | C10H12NSO10P2                        | -3     | Cytosol               |
| dgdp                  | dGDP                                                                                                               | 2'-Deoxyguanosine 5'-diphosphate                                                                                     | C10H12NSO10P2                        | -3     | Mitochondria          |
| dgdp                  | dGDP                                                                                                               | 2'-Deoxyguanosine 5'-diphosphate                                                                                     | C10H12NSO10P2                        | -3     | Nucleus               |
| dgmpp                 | dGMP                                                                                                               | 2'-Deoxyguanosine 5'-monophosphate, 2'-Deoxyguanosine 5'-phosphate, Deoxyguanosine monophosphate, Deoxyguanylic acid | C10H12NSO7P                          | -2     | Cytosol               |
| dgmpp                 | dGMP                                                                                                               | 2'-Deoxyguanosine 5'-monophosphate, 2'-Deoxyguanosine 5'-phosphate, Deoxyguanosine monophosphate, Deoxyguanylic acid | C10H12NSO7P                          | -2     | Lysosome              |
| dgmpp                 | dGMP                                                                                                               | 2'-Deoxyguanosine 5'-monophosphate, 2'-Deoxyguanosine 5'-phosphate, Deoxyguanosine monophosphate, Deoxyguanylic acid | C10H12NSO7P                          | -2     | Mitochondria          |
| dgpil_prot_hs         | deacylated-glycophosphatidylinositol (GPI)-anchored protein                                                        | {[(Prot-PE-(Man),(PE)-Man],[PE])-Man-GlcN-PI                                                                         | C39H76N4O37P4FULLR2CO2FU<br>LLR2CO2X | 0      | Endoplasmic Reticulum |
| dgsn                  | Deoxyguanosine                                                                                                     | 2'-Deoxyguanosine, 2'-deoxyguanosine hemihydrate                                                                     | C10H13NSO4                           | 0      | Cytosol               |
| dgsn                  | Deoxyguanosine                                                                                                     | 2'-Deoxyguanosine, 2'-deoxyguanosine hemihydrate                                                                     | C10H13NSO4                           | 0      | Extracellular         |
| dgsn                  | Deoxyguanosine                                                                                                     | 2'-Deoxyguanosine, 2'-deoxyguanosine hemihydrate                                                                     | C10H13NSO4                           | 0      | Lysosome              |
| dgsn                  | Deoxyguanosine                                                                                                     | 2'-Deoxyguanosine, 2'-deoxyguanosine hemihydrate                                                                     | C10H13NSO4                           | 0      | Mitochondria          |
| dgtpp                 | dGTP                                                                                                               | 2'-Deoxyguanosine 5'-triphosphate, Deoxyguanosine 5'-triphosphate, Deoxyguanosine triphosphate                       | C10H12NSO13P3                        | -4     | Cytosol               |
| dgtpp                 | dGTP                                                                                                               | 2'-Deoxyguanosine 5'-triphosphate, Deoxyguanosine 5'-triphosphate, Deoxyguanosine triphosphate                       | C10H12NSO13P3                        | -4     | Mitochondria          |
| dgtpp                 | dGTP                                                                                                               | 2'-Deoxyguanosine 5'-triphosphate, Deoxyguanosine 5'-triphosphate, Deoxyguanosine triphosphate                       | C10H12NSO13P3                        | -4     | Nucleus               |
| dha                   | Dihydroxyacetone                                                                                                   | 1, 3-Dihydroxy-2-propanone, 3-Dihydroxyacetone, 3-Dihydroxypropan-2-one, Glycerone                                   | C3H6O3                               | 0      | Cytosol               |
| dhapp                 | Dihydroxyacetone phosphate                                                                                         | Glycerone phosphate                                                                                                  | C3H5O6P                              | -2     | Cytosol               |
| dhapp                 | Dihydroxyacetone phosphate                                                                                         | Glycerone phosphate                                                                                                  | C3H5O6P                              | -2     | Peroxisome            |
| dhbpt                 | 6,7-Dihydrobiopterin                                                                                               | Dihydrobiopterin, Quinoid-dihydrobiopterin                                                                           | C9H13NSO3                            | 0      | Cytosol               |
| dhcholestanate        | 3alpha,7alpha-Dihydroxy-5beta-cholestanate                                                                         | 3alpha,7alpha-Dihydroxy-5beta-cholestanate, 3alpha,7alpha-Dihydroxy-5beta-cholestanate                               | C27H45O4                             | -1     | Mitochondria          |
| dhcholestanate        | 3alpha,7alpha-Dihydroxy-5beta-cholestanate                                                                         | 3alpha,7alpha-Dihydroxy-5beta-cholestanate, 3alpha,7alpha-Dihydroxy-5beta-cholestanate                               | C27H45O4                             | -1     | Endoplasmic Reticulum |
| dhcholestanate        | 3alpha,7alpha-Dihydroxy-5beta-cholestanate                                                                         | 3alpha,7alpha-Dihydroxy-5beta-cholestanate, 3alpha,7alpha-Dihydroxy-5beta-cholestanate                               | C27H45O4                             | -1     | Peroxisome            |
| dhcholestancoa        | 3alpha,7alpha-Dihydroxy-5beta-cholestanoyl-CoA                                                                     | 3alpha,7alpha-Dihydroxy-5beta-cholestanoyl-CoA                                                                       | C48H76N7O19P3S                       | -4     | Endoplasmic Reticulum |
| dhcholestancoa        | 3alpha,7alpha-Dihydroxy-5beta-cholestanoyl-CoA                                                                     | 3alpha,7alpha-Dihydroxy-5beta-cholestanoyl-CoA                                                                       | C48H76N7O19P3S                       | -4     | Peroxisome            |
| dhcholoylcoa          | 3alpha,7alpha-Dihydroxy-5beta-cholest-24-enoyl-CoA                                                                 | 3alpha,7alpha-Dihydroxy-5beta-cholest-24-enoyl-CoA                                                                   | C48H74N7O19P3S                       | -4     | Endoplasmic Reticulum |
| dhcholoylcoa          | 3alpha,7alpha-Dihydroxy-5beta-cholest-24-enoyl-CoA                                                                 | 3alpha,7alpha-Dihydroxy-5beta-cholest-24-enoyl-CoA                                                                   | C48H74N7O19P3S                       | -4     | Peroxisome            |
| dhcrrm_hs             | dihydroceramide (homo sapiens)                                                                                     | N-Acylsphinganine                                                                                                    | C18H38NO2FULLR2CO                    | 0      | Cytosol               |
| dhdascb               | Dehydroascorbate                                                                                                   | DHA, Dehydroascorbic acid                                                                                            | C6H6O6                               | 0      | Cytosol               |
| dhdascb               | Dehydroascorbate                                                                                                   | DHA, Dehydroascorbic acid                                                                                            | C6H6O6                               | 0      | Extracellular         |
| dhea                  | Dehydroepiandrosterone                                                                                             | 3beta-Hydroxyandrost-5-en-17-one, DHA, DHEA, Dehydroisoandrosterone                                                  | C19H28O2                             | 0      | Cytosol               |
| dhea                  | Dehydroepiandrosterone                                                                                             | 3beta-Hydroxyandrost-5-en-17-one, DHA, DHEA, Dehydroisoandrosterone                                                  | C19H28O2                             | 0      | Endoplasmic Reticulum |
| dheas                 | Dehydroepiandrosterone sulfate                                                                                     | 3beta-Hydroxyandrost-5-en-17-one 3-sulfate, Dehydroepiandrosterone sulfate                                           | C19H27O5S                            | -1     | Cytosol               |
| dheas                 | Dehydroepiandrosterone sulfate                                                                                     | 3beta-Hydroxyandrost-5-en-17-one 3-sulfate, Dehydroepiandrosterone sulfate                                           | C19H27O5S                            | -1     | Extracellular         |
| dheas                 | Dehydroepiandrosterone sulfate                                                                                     | 3beta-Hydroxyandrost-5-en-17-one 3-sulfate, Dehydroepiandrosterone sulfate                                           | C19H27O5S                            | -1     | Endoplasmic Reticulum |
| dhf                   | 7,8-Dihydrofolate                                                                                                  | 7,8-Dihydrofolic acid, Dihydrofolate, Dihydrofolic acid                                                              | C19H19N7O6                           | -2     | Cytosol               |
| dhf                   | 7,8-Dihydrofolate                                                                                                  | 7,8-Dihydrofolic acid, Dihydrofolate, Dihydrofolic acid                                                              | C19H19N7O6                           | -2     | Extracellular         |
| dhf                   | 7,8-Dihydrofolate                                                                                                  | 7,8-Dihydrofolic acid, Dihydrofolate, Dihydrofolic acid                                                              | C19H19N7O6                           | -2     | Lysosome              |
| dhf                   | 7,8-Dihydrofolate                                                                                                  | 7,8-Dihydrofolic acid, Dihydrofolate, Dihydrofolic acid                                                              | C19H19N7O6                           | -2     | Mitochondria          |

| Abbreviation    | Metabolite Name                                           | Synonyms                                                                                                                                                                 | Formula                                                                             | Charge | Compartment           |
|-----------------|-----------------------------------------------------------|--------------------------------------------------------------------------------------------------------------------------------------------------------------------------|-------------------------------------------------------------------------------------|--------|-----------------------|
| dhlam           | Dihydroliipoamide                                         | Dihydrothioctamide                                                                                                                                                       | C8H17NO <sub>2</sub>                                                                | 0      | Mitochondria          |
| dhlpro          | Dihydroliipoalprotein                                     |                                                                                                                                                                          | H <sub>2</sub> S <sub>2</sub> X                                                     | 0      | Mitochondria          |
| dhocholoylcoa   | 3alpha,7alpha,12alpha,26-Tetrahydroxy-5beta-cholestane    | 3alpha,7alpha,12alpha,26-Tetrahydroxy-5beta-cholestane, 3alpha,7alpha-Dihydroxy-5beta-24-oxocholestanoyl-CoA, 5beta-Cholestane-3alpha,7alpha,12alpha,26-tetraol          | C <sub>48</sub> H <sub>74</sub> N <sub>7</sub> O <sub>20</sub> P <sub>3</sub> S     | -4     | Peroxisome            |
| dhor-S          | (S)-Dihydroorotate                                        | (S)-4, 5-Dihydroorotate, Dihydro-L-orotic acid, L-Dihydroorotate, L-Dihydroorotic acid                                                                                   | C <sub>5</sub> H <sub>5</sub> N <sub>2</sub> O <sub>4</sub>                         | -1     | Cytosol               |
| didp            | dIDP                                                      | 2'-Deoxyinosine 5'-diphosphate, 2'-Deoxyinosine-5-diphosphate                                                                                                            | C <sub>10</sub> H <sub>11</sub> N <sub>4</sub> O <sub>10</sub> P <sub>2</sub>       | -3     | Cytosol               |
| didp            | dIDP                                                      | 2'-Deoxyinosine 5'-diphosphate, 2'-Deoxyinosine-5-diphosphate                                                                                                            | C <sub>10</sub> H <sub>11</sub> N <sub>4</sub> O <sub>10</sub> P <sub>2</sub>       | -3     | Mitochondria          |
| didp            | dIDP                                                      | 2'-Deoxyinosine 5'-diphosphate, 2'-Deoxyinosine-5-diphosphate                                                                                                            | C <sub>10</sub> H <sub>11</sub> N <sub>4</sub> O <sub>10</sub> P <sub>2</sub>       | -3     | Nucleus               |
| digalsalside_hs | Digalactosylceramidesulfate                               | Digalactosylceramidesulfate                                                                                                                                              | C <sub>30</sub> H <sub>55</sub> N <sub>1</sub> O <sub>15</sub> SFULLR <sub>CO</sub> | -1     | Cytosol               |
| digalsalside_hs | Digalactosylceramidesulfate                               | Digalactosylceramidesulfate                                                                                                                                              | C <sub>30</sub> H <sub>55</sub> N <sub>1</sub> O <sub>15</sub> SFULLR <sub>CO</sub> | -1     | Extracellular         |
| digalsalside_hs | Digalactosylceramidesulfate                               | Digalactosylceramidesulfate                                                                                                                                              | C <sub>30</sub> H <sub>55</sub> N <sub>1</sub> O <sub>15</sub> SFULLR <sub>CO</sub> | -1     | Golgi Apparatus       |
| digalside_hs    | Digalactosylceramide                                      | Gal-Gal-Cer, Gal-alpha1->4Gal-beta1->1'Cer                                                                                                                               | C <sub>30</sub> H <sub>56</sub> N <sub>1</sub> O <sub>12</sub> FULLR <sub>CO</sub>  | 0      | Cytosol               |
| digalside_hs    | Digalactosylceramide                                      | Gal-Gal-Cer, Gal-alpha1->4Gal-beta1->1'Cer                                                                                                                               | C <sub>30</sub> H <sub>56</sub> N <sub>1</sub> O <sub>12</sub> FULLR <sub>CO</sub>  | 0      | Golgi Apparatus       |
| digalside_hs    | Digalactosylceramide                                      | Gal-Gal-Cer, Gal-alpha1->4Gal-beta1->1'Cer                                                                                                                               | C <sub>30</sub> H <sub>56</sub> N <sub>1</sub> O <sub>12</sub> FULLR <sub>CO</sub>  | 0      | Lysosome              |
| dimp            | dIMP                                                      | 2'-Deoxyinosine 5'-phosphate                                                                                                                                             | C <sub>10</sub> H <sub>11</sub> N <sub>4</sub> O <sub>7</sub> P                     | -2     | Cytosol               |
| din             | Deoxyinosine                                              | 2'-deoxy-inosine                                                                                                                                                         | C <sub>10</sub> H <sub>12</sub> N <sub>4</sub> O <sub>4</sub>                       | 0      | Cytosol               |
| din             | Deoxyinosine                                              | 2'-deoxy-inosine                                                                                                                                                         | C <sub>10</sub> H <sub>12</sub> N <sub>4</sub> O <sub>4</sub>                       | 0      | Extracellular         |
| diip            | dITP                                                      | 2'-Deoxyinosine 5'-triphosphate, 2'-Deoxyinosine-5-triphosphate                                                                                                          | C <sub>10</sub> H <sub>11</sub> N <sub>4</sub> O <sub>13</sub> P <sub>3</sub>       | -4     | Cytosol               |
| diip            | dITP                                                      | 2'-Deoxyinosine 5'-triphosphate, 2'-Deoxyinosine-5-triphosphate                                                                                                          | C <sub>10</sub> H <sub>11</sub> N <sub>4</sub> O <sub>13</sub> P <sub>3</sub>       | -4     | Mitochondria          |
| diip            | dITP                                                      | 2'-Deoxyinosine 5'-triphosphate, 2'-Deoxyinosine-5-triphosphate                                                                                                          | C <sub>10</sub> H <sub>11</sub> N <sub>4</sub> O <sub>13</sub> P <sub>3</sub>       | -4     | Nucleus               |
| dknpp           | 2,3-diketo-5-methylthio-1-phosphopentane                  | 1-phospho-2,3-diketo-5-methylthiopentane                                                                                                                                 | C <sub>6</sub> H <sub>9</sub> O <sub>6</sub> P <sub>5</sub>                         | -2     | Cytosol               |
| dnlcg           | dihomo-gamma-linolenic acid (n-6)                         | (Z,Z,Z)-8,11,14-Eicosatrienoate, (Z,Z,Z)-8,11,14-Icosatrienoate, 8,11,14-Eicosatrienoate, 8,11,14-Icosatrienoate, Dihomo-gamma-linolenic acid, icos 6,9,12-trienoic acid | C <sub>20</sub> H <sub>33</sub> O <sub>2</sub>                                      | -1     | Cytosol               |
| dnlcg           | dihomo-gamma-linolenic acid (n-6)                         | (Z,Z,Z)-8,11,14-Eicosatrienoate, (Z,Z,Z)-8,11,14-Icosatrienoate, 8,11,14-Eicosatrienoate, 8,11,14-Icosatrienoate, Dihomo-gamma-linolenic acid, icos 6,9,12-trienoic acid | C <sub>20</sub> H <sub>33</sub> O <sub>2</sub>                                      | -1     | Extracellular         |
| dnlcgoa         | dihomo-gamma-linolenyl coenzyme A                         |                                                                                                                                                                          | C <sub>41</sub> H <sub>64</sub> N <sub>7</sub> O <sub>17</sub> P <sub>3</sub> S     | -4     | Cytosol               |
| dnlcgoa         | dihomo-gamma-linolenyl coenzyme A                         |                                                                                                                                                                          | C <sub>41</sub> H <sub>64</sub> N <sub>7</sub> O <sub>17</sub> P <sub>3</sub> S     | -4     | Mitochondria          |
| dnlcgcrn        | dihomo-gamma-linolenyl carnitine                          |                                                                                                                                                                          | C <sub>27</sub> H <sub>47</sub> N <sub>3</sub> O <sub>4</sub>                       | 0      | Cytosol               |
| dnlcgcrn        | dihomo-gamma-linolenyl carnitine                          |                                                                                                                                                                          | C <sub>27</sub> H <sub>47</sub> N <sub>3</sub> O <sub>4</sub>                       | 0      | Mitochondria          |
| dmanipyrine     | demethylated antipyrine                                   |                                                                                                                                                                          | C <sub>10</sub> H <sub>10</sub> N <sub>2</sub> O                                    | 0      | Cytosol               |
| dmanipyrine     | demethylated antipyrine                                   |                                                                                                                                                                          | C <sub>10</sub> H <sub>10</sub> N <sub>2</sub> O                                    | 0      | Extracellular         |
| dmgly           | N,N-Dimethylglycine                                       | Dimethylglycine                                                                                                                                                          | C <sub>4</sub> H <sub>9</sub> N <sub>2</sub> O                                      | 0      | Cytosol               |
| dmgly           | N,N-Dimethylglycine                                       | Dimethylglycine                                                                                                                                                          | C <sub>4</sub> H <sub>9</sub> N <sub>2</sub> O                                      | 0      | Mitochondria          |
| dnhptcoa        | 2,6 dimethylheptanoyl-CoA                                 | dimethyl heptanoyl coenzyme A                                                                                                                                            | C <sub>30</sub> H <sub>52</sub> N <sub>7</sub> O <sub>17</sub> P <sub>3</sub> S     | -4     | Cytosol               |
| dnhptcoa        | 2,6 dimethylheptanoyl-CoA                                 | dimethyl heptanoyl coenzyme A                                                                                                                                            | C <sub>30</sub> H <sub>52</sub> N <sub>7</sub> O <sub>17</sub> P <sub>3</sub> S     | -4     | Mitochondria          |
| dnhptcrn        | 2,6 dimethylheptanoyl carnitine                           | dimethyl heptanoyl carnitine                                                                                                                                             | C <sub>16</sub> H <sub>35</sub> N <sub>3</sub> O <sub>4</sub>                       | 0      | Cytosol               |
| dnhptcrn        | 2,6 dimethylheptanoyl carnitine                           | dimethyl heptanoyl carnitine                                                                                                                                             | C <sub>16</sub> H <sub>35</sub> N <sub>3</sub> O <sub>4</sub>                       | 0      | Extracellular         |
| dnhptcrn        | 2,6 dimethylheptanoyl carnitine                           | dimethyl heptanoyl carnitine                                                                                                                                             | C <sub>16</sub> H <sub>35</sub> N <sub>3</sub> O <sub>4</sub>                       | 0      | Mitochondria          |
| dnnoncoa        | 4,8 dimethylnonanoyl-CoA                                  | 4,8 dimethylnonanoyl coenzyme a                                                                                                                                          | C <sub>32</sub> H <sub>54</sub> N <sub>7</sub> O <sub>17</sub> P <sub>3</sub> S     | -4     | Cytosol               |
| dnnoncoa        | 4,8 dimethylnonanoyl-CoA                                  | 4,8 dimethylnonanoyl coenzyme a                                                                                                                                          | C <sub>32</sub> H <sub>54</sub> N <sub>7</sub> O <sub>17</sub> P <sub>3</sub> S     | -4     | Mitochondria          |
| dnnoncoa        | 4,8 dimethylnonanoyl-CoA                                  | 4,8 dimethylnonanoyl coenzyme a                                                                                                                                          | C <sub>32</sub> H <sub>54</sub> N <sub>7</sub> O <sub>17</sub> P <sub>3</sub> S     | -4     | Peroxisome            |
| dnnoncrn        | 4,8 dimethylnonanoyl carnitine                            |                                                                                                                                                                          | C <sub>18</sub> H <sub>37</sub> N <sub>3</sub> O <sub>4</sub>                       | 0      | Mitochondria          |
| dnnoncrn        | 4,8 dimethylnonanoyl carnitine                            |                                                                                                                                                                          | C <sub>18</sub> H <sub>37</sub> N <sub>3</sub> O <sub>4</sub>                       | 0      | Peroxisome            |
| dmpp            | Dimethylallyl diphosphate                                 | 2-Isopentenyl diphosphate, Prenyl diphosphate, delta2-Isopentenyl diphosphate, dimethylallyl pyrophosphate                                                               | C <sub>5</sub> H <sub>9</sub> O <sub>7</sub> P <sub>2</sub>                         | -3     | Cytosol               |
| dmpp            | Dimethylallyl diphosphate                                 | 2-Isopentenyl diphosphate, Prenyl diphosphate, delta2-Isopentenyl diphosphate, dimethylallyl pyrophosphate                                                               | C <sub>5</sub> H <sub>9</sub> O <sub>7</sub> P <sub>2</sub>                         | -3     | Peroxisome            |
| dna             | DNA                                                       |                                                                                                                                                                          | C <sub>10</sub> H <sub>17</sub> O <sub>8</sub> P <sub>2</sub>                       | 0      | Nucleus               |
| dna5mtc         | DNA 5-methylcytosine                                      |                                                                                                                                                                          | C <sub>11</sub> H <sub>19</sub> O <sub>8</sub> P <sub>2</sub>                       | 0      | Nucleus               |
| dnad            | Deamino-NAD+                                              | Deamido-NAD+                                                                                                                                                             | C <sub>21</sub> H <sub>24</sub> N <sub>6</sub> O <sub>15</sub> P <sub>2</sub>       | -2     | Cytosol               |
| dnad            | Deamino-NAD+                                              | Deamido-NAD+                                                                                                                                                             | C <sub>21</sub> H <sub>24</sub> N <sub>6</sub> O <sub>15</sub> P <sub>2</sub>       | -2     | Mitochondria          |
| dnad            | Deamino-NAD+                                              | Deamido-NAD+                                                                                                                                                             | C <sub>21</sub> H <sub>24</sub> N <sub>6</sub> O <sub>15</sub> P <sub>2</sub>       | -2     | Nucleus               |
| doldp_L         | Dolichol diphosphate, human liver homolog                 |                                                                                                                                                                          | C <sub>108</sub> O <sub>181</sub> H <sub>1758</sub> O <sub>70</sub> P <sub>20</sub> | -30    | Endoplasmic Reticulum |
| doldp_U         | Dolichol diphosphate, human uterine homolog               |                                                                                                                                                                          | C <sub>102</sub> S <sub>5</sub> H <sub>16700</sub> O <sub>70</sub> P <sub>20</sub>  | -30    | Endoplasmic Reticulum |
| dolgclp_L       | Dolichyl beta-D-glucosyl phosphate, human liver homolog   |                                                                                                                                                                          | C <sub>1140</sub> H <sub>1868</sub> O <sub>90</sub> P <sub>10</sub>                 | -10    | Cytosol               |
| dolgclp_L       | Dolichyl beta-D-glucosyl phosphate, human liver homolog   |                                                                                                                                                                          | C <sub>1140</sub> H <sub>1868</sub> O <sub>90</sub> P <sub>10</sub>                 | -10    | Endoplasmic Reticulum |
| dolgclp_U       | Dolichyl beta-D-glucosyl phosphate, human uterine homolog |                                                                                                                                                                          | C <sub>108</sub> S <sub>5</sub> H <sub>17800</sub> O <sub>90</sub> P <sub>10</sub>  | -10    | Cytosol               |
| dolgclp_U       | Dolichyl beta-D-glucosyl phosphate, human uterine homolog |                                                                                                                                                                          | C <sub>108</sub> S <sub>5</sub> H <sub>17800</sub> O <sub>90</sub> P <sub>10</sub>  | -10    | Endoplasmic Reticulum |
| doichol_L       | Dolichol, human liver homolog                             |                                                                                                                                                                          | C <sub>108</sub> O <sub>18</sub> H <sub>1768</sub> O <sub>10</sub>                  | 0      | Cytosol               |
| doichol_L       | Dolichol, human liver homolog                             |                                                                                                                                                                          | C <sub>108</sub> O <sub>18</sub> H <sub>1768</sub> O <sub>10</sub>                  | 0      | Endoplasmic Reticulum |
| doichol_U       | Dolichol, human uterine homolog                           |                                                                                                                                                                          | C <sub>102</sub> S <sub>5</sub> H <sub>16800</sub> O <sub>10</sub>                  | 0      | Cytosol               |
| doichol_U       | Dolichol, human uterine homolog                           |                                                                                                                                                                          | C <sub>102</sub> S <sub>5</sub> H <sub>16800</sub> O <sub>10</sub>                  | 0      | Endoplasmic Reticulum |

| Abbreviation | Metabolite Name                                                      | Synonyms                                                                                                                                            | Formula          | Charge | Compartment           |
|--------------|----------------------------------------------------------------------|-----------------------------------------------------------------------------------------------------------------------------------------------------|------------------|--------|-----------------------|
| dolmanp_L    | Dolichyl phosphate D-mannose, human liver homolog                    | Dolichyl D-mannosyl phosphate                                                                                                                       | C1140H1868O90P10 | -10    | Cytosol               |
| dolmanp_L    | Dolichyl phosphate D-mannose, human liver homolog                    | Dolichyl D-mannosyl phosphate                                                                                                                       | C1140H1868O90P10 | -10    | Endoplasmic Reticulum |
| dolmanp_U    | Dolichyl phosphate D-mannose, human uterine homolog                  | Dolichyl D-mannosyl phosphate                                                                                                                       | C1085H1780O90P10 | -10    | Cytosol               |
| dolmanp_U    | Dolichyl phosphate D-mannose, human uterine homolog                  | Dolichyl D-mannosyl phosphate                                                                                                                       | C1085H1780O90P10 | -10    | Endoplasmic Reticulum |
| dolp_L       | Dolichol phosphate, human liver homolog                              | Dolichyl phosphate                                                                                                                                  | C1080H1758O40P10 | -20    | Cytosol               |
| dolp_L       | Dolichol phosphate, human liver homolog                              | Dolichyl phosphate                                                                                                                                  | C1080H1758O40P10 | -20    | Endoplasmic Reticulum |
| dolp_U       | Dolichol phosphate, human uterine homolog                            | Dolichyl phosphate                                                                                                                                  | C1025H1670O40P10 | -20    | Cytosol               |
| dolp_U       | Dolichol phosphate, human uterine homolog                            | Dolichyl phosphate                                                                                                                                  | C1025H1670O40P10 | -20    | Endoplasmic Reticulum |
| dopa         | Dopamine                                                             | 2-(3,4-Dihydroxyphenyl)ethylamine, 3,4-Dihydroxyphenethylamine, 4-(2-Aminoethyl)-1,2-benzenediol, 4-(2-Aminoethyl)benzene-1,2-diol                  | C8H12NO2         | 1      | Cytosol               |
| dopa         | Dopamine                                                             | 2-(3,4-Dihydroxyphenyl)ethylamine, 3,4-Dihydroxyphenethylamine, 4-(2-Aminoethyl)-1,2-benzenediol, 4-(2-Aminoethyl)benzene-1,2-diol                  | C8H12NO2         | 1      | Extracellular         |
| dopaqn       | Dopaquinone                                                          |                                                                                                                                                     | C9H9NO4          | 0      | Cytosol               |
| dopasf       | Dopamine 3-O-sulfate                                                 |                                                                                                                                                     | C8H11NO5S        | 0      | Cytosol               |
| dopasf       | Dopamine 3-O-sulfate                                                 |                                                                                                                                                     | C8H11NO5S        | 0      | Extracellular         |
| dpcoa        | Dephospho-CoA                                                        |                                                                                                                                                     | C21H33N7O13P2S   | -2     | Cytosol               |
| dpcoa        | Dephospho-CoA                                                        |                                                                                                                                                     | C21H33N7O13P2S   | -2     | Lysosome              |
| drnb         | Deoxyribose                                                          | 2-Deoxy-D-ribose, 2-Deoxy-beta-D-erythro-pentose, Thymine                                                                                           | C5H10O4          | 0      | Cytosol               |
| drnb         | Deoxyribose                                                          | 2-Deoxy-D-ribose, 2-Deoxy-beta-D-erythro-pentose, Thymine                                                                                           | C5H10O4          | 0      | Extracellular         |
| dsmsterol    | Desmosterol                                                          | 24-Dehydrocholesterol, Cholesta-5,24-dien-3beta-ol, Desmosterol                                                                                     | C27H44O          | 0      | Endoplasmic Reticulum |
| dst_antigen  | disialyl-T antigen                                                   |                                                                                                                                                     | C36H56N3O26X     | -2     | Golgi Apparatus       |
| dtup         | dTDP                                                                 | Thymidine 5'-diphosphate                                                                                                                            | C10H13N2O11P2    | -3     | Cytosol               |
| dtup         | dTDP                                                                 | Thymidine 5'-diphosphate                                                                                                                            | C10H13N2O11P2    | -3     | Mitochondria          |
| dtup         | dTDP                                                                 | Thymidine 5'-diphosphate                                                                                                                            | C10H13N2O11P2    | -3     | Nucleus               |
| dtup4d6dg    | dTDP-4-dehydro-6-deoxy-D-glucose                                     | dTDP-4-oxo-6-deoxy-D-glucose                                                                                                                        | C16H22N2O15P2    | -2     | Cytosol               |
| dtup4d6dm    | dTDP-4-dehydro-6-deoxy-L-mannose                                     | dTDP-4-oxo-6-deoxy-L-mannose, dTDP-4-oxo-L-rhamnose                                                                                                 | C16H22N2O15P2    | -2     | Cytosol               |
| dtupglu      | dTDPglucose                                                          | dTDP-D-glucose                                                                                                                                      | C16H24N2O16P2    | -2     | Cytosol               |
| dtuprnm      | dTDP-L-rhamnose                                                      | dTDP-6-deoxy-L-mannose, dTDP-L-rhamnose                                                                                                             | C16H24N2O15P2    | -2     | Cytosol               |
| dtmp         | dTMP                                                                 | 5-Thymidylic acid, Deoxythymidine 5'-phosphate, Deoxythymidylic acid, Thymidine 5'-phosphate, Thymidine monophosphate, Thymidylate, Thymidylic acid | C10H13N2O8P      | -2     | Cytosol               |
| dtmp         | dTMP                                                                 | 5-Thymidylic acid, Deoxythymidine 5'-phosphate, Deoxythymidylic acid, Thymidine 5'-phosphate, Thymidine monophosphate, Thymidylate, Thymidylic acid | C10H13N2O8P      | -2     | Lysosome              |
| dtmp         | dTMP                                                                 | 5-Thymidylic acid, Deoxythymidine 5'-phosphate, Deoxythymidylic acid, Thymidine 5'-phosphate, Thymidine monophosphate, Thymidylate, Thymidylic acid | C10H13N2O8P      | -2     | Mitochondria          |
| dtu          | Dithiothreitol                                                       | 1, 3-butanediol, 4-Dimercapto-2, 4-Dithiothreitol, DTT, threo-1                                                                                     | C4H10O2S2        | 0      | Cytosol               |
| dtuOX        | Oxidized dithiothreitol                                              |                                                                                                                                                     | C4H8O2S2         | 0      | Cytosol               |
| dtup         | dTTP                                                                 | TTP, Thymidine 5'-triphosphate, Thymidine triphosphate                                                                                              | C10H13N2O14P3    | -4     | Cytosol               |
| dtup         | dTTP                                                                 | TTP, Thymidine 5'-triphosphate, Thymidine triphosphate                                                                                              | C10H13N2O14P3    | -4     | Mitochondria          |
| dtup         | dTTP                                                                 | TTP, Thymidine 5'-triphosphate, Thymidine triphosphate                                                                                              | C10H13N2O14P3    | -4     | Nucleus               |
| duap         | dUDP                                                                 | 2'-Deoxyuridine 5'-diphosphate                                                                                                                      | C9H11N2O11P2     | -3     | Cytosol               |
| duap         | dUDP                                                                 | 2'-Deoxyuridine 5'-diphosphate                                                                                                                      | C9H11N2O11P2     | -3     | Mitochondria          |
| duap         | dUDP                                                                 | 2'-Deoxyuridine 5'-diphosphate                                                                                                                      | C9H11N2O11P2     | -3     | Nucleus               |
| dump         | dUMP                                                                 | 2'-Deoxyuridine 5'-phosphate, Deoxyuridine 5'-phosphate, Deoxyuridine monophosphate, Deoxyuridylic acid                                             | C9H11N2O8P       | -2     | Cytosol               |
| dump         | dUMP                                                                 | 2'-Deoxyuridine 5'-phosphate, Deoxyuridine 5'-phosphate, Deoxyuridine monophosphate, Deoxyuridylic acid                                             | C9H11N2O8P       | -2     | Mitochondria          |
| dump         | dUMP                                                                 | 2'-Deoxyuridine 5'-phosphate, Deoxyuridine 5'-phosphate, Deoxyuridine monophosphate, Deoxyuridylic acid                                             | C9H11N2O8P       | -2     | Nucleus               |
| duri         | Deoxyuridine                                                         | 2'-Deoxyuridine, 2-Deoxyuridine                                                                                                                     | C9H12N2O5        | 0      | Cytosol               |
| duri         | Deoxyuridine                                                         | 2'-Deoxyuridine, 2-Deoxyuridine                                                                                                                     | C9H12N2O5        | 0      | Extracellular         |
| duri         | Deoxyuridine                                                         | 2'-Deoxyuridine, 2-Deoxyuridine                                                                                                                     | C9H12N2O5        | 0      | Mitochondria          |
| duri         | Deoxyuridine                                                         | 2'-Deoxyuridine, 2-Deoxyuridine                                                                                                                     | C9H12N2O5        | 0      | Nucleus               |
| dtup         | dUTP                                                                 | 2'-Deoxyuridine 5'-triphosphate                                                                                                                     | C9H11N2O14P3     | -4     | Cytosol               |
| dtup         | dUTP                                                                 | 2'-Deoxyuridine 5'-triphosphate                                                                                                                     | C9H11N2O14P3     | -4     | Mitochondria          |
| dtup         | dUTP                                                                 | 2'-Deoxyuridine 5'-triphosphate                                                                                                                     | C9H11N2O14P3     | -4     | Nucleus               |
| dxtrn        | phosphorylase-limit dextrin (glycogenin-1,6[4[1,4-Glc], 4[1,4-Glc]]) |                                                                                                                                                     | C48H81O41X       | 0      | Cytosol               |
| e4hglu       | L-erythro-4-Hydroxyglutamate                                         |                                                                                                                                                     | C5H8NO5          | -1     | Cytosol               |
| e4hglu       | L-erythro-4-Hydroxyglutamate                                         |                                                                                                                                                     | C5H8NO5          | -1     | Mitochondria          |
| e4p          | D-Erythrose 4-phosphate                                              | 4-phospho D-erythrose                                                                                                                               | C4H7O7P          | -2     | Cytosol               |
| eaflatoxin   | 8,9 epoxy aflatoxin B1                                               |                                                                                                                                                     | C17H12O7         | 0      | Cytosol               |
| eaflatoxin   | 8,9 epoxy aflatoxin B1                                               |                                                                                                                                                     | C17H12O7         | 0      | Extracellular         |

| Abbreviation         | Metabolite Name                                                                                             | Synonyms                                                                                                                                                                                                                                                           | Formula                          | Charge | Compartment           |
|----------------------|-------------------------------------------------------------------------------------------------------------|--------------------------------------------------------------------------------------------------------------------------------------------------------------------------------------------------------------------------------------------------------------------|----------------------------------|--------|-----------------------|
| eandrstrm            | epiandrosterone                                                                                             | 16alpha-Hydroxydehydroepiandrosterone, 5-Androstene-3beta,16alpha-diol-17-one                                                                                                                                                                                      | C19H28O3                         | 0      | Endoplasmic Reticulum |
| ebastine             | ebastine                                                                                                    | 4-Diphenylmethoxy-1-(3-(4-tert-butylbenzoyl)propyl)piperidine, Ebastel, Ebastina, Ebastine, Ebastinum, Kestine, ebastine                                                                                                                                           | C32H39NO2                        | 0      | Cytosol               |
| ebastine             | ebastine                                                                                                    | 4-Diphenylmethoxy-1-(3-(4-tert-butylbenzoyl)propyl)piperidine, Ebastel, Ebastina, Ebastine, Ebastinum, Kestine, ebastine                                                                                                                                           | C32H39NO2                        | 0      | Extracellular         |
| ebastine             | ebastine                                                                                                    | 4-Diphenylmethoxy-1-(3-(4-tert-butylbenzoyl)propyl)piperidine, Ebastel, Ebastina, Ebastine, Ebastinum, Kestine, ebastine                                                                                                                                           | C32H39NO2                        | 0      | Endoplasmic Reticulum |
| ebastineoh           | hydroxylated ebastine                                                                                       |                                                                                                                                                                                                                                                                    | C32H39NO3                        | 0      | Cytosol               |
| ebastineoh           | hydroxylated ebastine                                                                                       |                                                                                                                                                                                                                                                                    | C32H39NO3                        | 0      | Extracellular         |
| ebastineoh           | hydroxylated ebastine                                                                                       |                                                                                                                                                                                                                                                                    | C32H39NO3                        | 0      | Endoplasmic Reticulum |
| ecgon                | ecgonine                                                                                                    |                                                                                                                                                                                                                                                                    | C9H14NO3                         | -1     | Endoplasmic Reticulum |
| egme                 | ecgonine methyl ester                                                                                       |                                                                                                                                                                                                                                                                    | C10H17NO3                        | 0      | Endoplasmic Reticulum |
| eicostet             | eicosatetraenoic acid                                                                                       | 8,11,14,17-Eicosatetraenoic acid                                                                                                                                                                                                                                   | C20H31O2                         | -1     | Cytosol               |
| eicostet             | eicosatetraenoic acid                                                                                       | 8,11,14,17-Eicosatetraenoic acid                                                                                                                                                                                                                                   | C20H31O2                         | -1     | Extracellular         |
| eicostetcoa          | eicosatetraenyl coenzyme A                                                                                  | 8,11,14,17-Eicosatetraenoic acid coenzyme a                                                                                                                                                                                                                        | C41H62N7O17P3S                   | -4     | Cytosol               |
| eicostetcoa          | eicosatetraenyl coenzyme A                                                                                  | 8,11,14,17-Eicosatetraenoic acid coenzyme a                                                                                                                                                                                                                        | C41H62N7O17P3S                   | -4     | Mitochondria          |
| eicostetcrn          | Eicosatetraenyl carnitine                                                                                   |                                                                                                                                                                                                                                                                    | C27H45NO4                        | 0      | Cytosol               |
| eicostetcrn          | Eicosatetraenyl carnitine                                                                                   |                                                                                                                                                                                                                                                                    | C27H45NO4                        | 0      | Mitochondria          |
| elaid                | elaidic acid                                                                                                | (E)-9-Octadecenoic acid, (E)-Oleic acid, 9-Octadecenoic acid, (E)-, 9-trans-Octadecenoic acid D9-trans-Octadecenoic acid, Elaidinsäure, acide elaidique, elaidic acid, trans-9-Octadecenoic acid, trans-D9-Octadecenoic acid, trans-Elaidic acid, trans-Oleic acid | C18H33O2                         | -1     | Cytosol               |
| elaid                | elaidic acid                                                                                                | (E)-9-Octadecenoic acid, (E)-Oleic acid, 9-Octadecenoic acid, (E)-, 9-trans-Octadecenoic acid D9-trans-Octadecenoic acid, Elaidinsäure, acide elaidique, elaidic acid, trans-9-Octadecenoic acid, trans-D9-Octadecenoic acid, trans-Elaidic acid, trans-Oleic acid | C18H33O2                         | -1     | Extracellular         |
| elaidcm              | Elaidic carnitine                                                                                           | elaidic acid carnitine                                                                                                                                                                                                                                             | C25H47NO4                        | 0      | Cytosol               |
| elaidcm              | Elaidic carnitine                                                                                           | elaidic acid carnitine                                                                                                                                                                                                                                             | C25H47NO4                        | 0      | Mitochondria          |
| em2emgacpail_hs      | (phosphoethanolaminyldimannosyl)(phosphoethanolaminyldimannosyl)-glucosaminyl-acylphosphatidylinositol (H7) | [PE-(Man)2],[PE]-Man-GlcN-acylPI                                                                                                                                                                                                                                   | C53H100N3O35P3FULLR2CO2FULR2CO2  | 0      | Endoplasmic Reticulum |
| em2emgacpail_prot_hs | (phosphoethanolaminyldimannosyl)(phosphoethanolaminyldimannosyl)-glucosaminyl-acylphosphatidylinositol      | [[PE-(Man)2],[PE]-Man-GlcN-acylPI-prot                                                                                                                                                                                                                             | C53H100N3O35P3FULLR2CO2FULR2CO2X | 0      | Endoplasmic Reticulum |
| em3gacpail_hs        | phosphoethanolaminyldimannosyl-acylphosphatidylinositol (H6)                                                | PE-(Man)3-GlcN-acylPI                                                                                                                                                                                                                                              | C51H94N3O32P2FULLR2CO2FULR2CO2   | 0      | Endoplasmic Reticulum |
| emem2gacpail_hs      | (phosphoethanolaminyldimannosyl)(phosphoethanolaminyldimannosyl)-glucosaminyl-acylphosphatidylinositol (H7) | [PE-Man],[PE]-[Man]2-GlcN-acylPI                                                                                                                                                                                                                                   | C53H100N3O35P3FULLR2CO2FULR2CO2  | 0      | Endoplasmic Reticulum |
| emgacpail_hs         | phosphoethanolaminyldimannosyl-acylphosphatidylinositol (H5)                                                | PE-Man-GlcN-acylPI                                                                                                                                                                                                                                                 | C39H74N2O22P2FULLR2CO2FULR2CO2   | 0      | Endoplasmic Reticulum |
| eryth                | L-Erythrulose                                                                                               | L-glycero-Tetrolose                                                                                                                                                                                                                                                | C4H8O4                           | 0      | Cytosol               |
| estradiol            | Estradiol                                                                                                   | Estradiol-17beta, beta-Estradiol                                                                                                                                                                                                                                   | C18H24O2                         | 0      | Cytosol               |
| estradiol            | Estradiol                                                                                                   | Estradiol-17beta, beta-Estradiol                                                                                                                                                                                                                                   | C18H24O2                         | 0      | Endoplasmic Reticulum |
| estradiolglc         | estradiol glucuronide                                                                                       | Estradiol-17beta 3-glucuronide                                                                                                                                                                                                                                     | C24H32O8                         | 0      | Cytosol               |
| estradiolglc         | estradiol glucuronide                                                                                       | Estradiol-17beta 3-glucuronide                                                                                                                                                                                                                                     | C24H32O8                         | 0      | Extracellular         |
| estradiolglc         | estradiol glucuronide                                                                                       | Estradiol-17beta 3-glucuronide                                                                                                                                                                                                                                     | C24H32O8                         | 0      | Endoplasmic Reticulum |
| estriol              | estriol                                                                                                     | 1,3,5(10)-Estratriene-3,16-alpha,17beta-triol, Estriol                                                                                                                                                                                                             | C18H24O3                         | 0      | Cytosol               |
| estriol              | estriol                                                                                                     | 1,3,5(10)-Estratriene-3,16-alpha,17beta-triol, Estriol                                                                                                                                                                                                             | C18H24O3                         | 0      | Endoplasmic Reticulum |
| estriolglc           | 16-Glucuronide-estriol                                                                                      | 16-Glucuronide, 16-Glucuronide-estriol, 16alpha,17beta-Estriol 16-(beta-D-glucuronide)                                                                                                                                                                             | C24H32O9                         | 0      | Cytosol               |
| estriolglc           | 16-Glucuronide-estriol                                                                                      | 16-Glucuronide, 16-Glucuronide-estriol, 16alpha,17beta-Estriol 16-(beta-D-glucuronide)                                                                                                                                                                             | C24H32O9                         | 0      | Extracellular         |
| estriolglc           | 16-Glucuronide-estriol                                                                                      | 16-Glucuronide, 16-Glucuronide-estriol, 16alpha,17beta-Estriol 16-(beta-D-glucuronide)                                                                                                                                                                             | C24H32O9                         | 0      | Endoplasmic Reticulum |
| estrone              | Estrone                                                                                                     | 3, 3-Hydroxy-1, 5(10)-estratrien-17-one                                                                                                                                                                                                                            | C18H22O2                         | 0      | Cytosol               |
| estrone              | Estrone                                                                                                     | 3, 3-Hydroxy-1, 5(10)-estratrien-17-one                                                                                                                                                                                                                            | C18H22O2                         | 0      | Endoplasmic Reticulum |
| estronegl            | estrone glucuronide                                                                                         |                                                                                                                                                                                                                                                                    | C24H30O8                         | 0      | Cytosol               |
| estronegl            | estrone glucuronide                                                                                         |                                                                                                                                                                                                                                                                    | C24H30O8                         | 0      | Extracellular         |
| estronegl            | estrone glucuronide                                                                                         |                                                                                                                                                                                                                                                                    | C24H30O8                         | 0      | Endoplasmic Reticulum |
| estrones             | Estrone 3-sulfate                                                                                           | Estrone 3-sulfate                                                                                                                                                                                                                                                  | C18H21O5S                        | -1     | Cytosol               |
| estrones             | Estrone 3-sulfate                                                                                           | Estrone 3-sulfate                                                                                                                                                                                                                                                  | C18H21O5S                        | -1     | Extracellular         |
| estrones             | Estrone 3-sulfate                                                                                           | Estrone 3-sulfate                                                                                                                                                                                                                                                  | C18H21O5S                        | -1     | Endoplasmic Reticulum |
| etfox                | Electron transfer flavoprotein oxidized                                                                     |                                                                                                                                                                                                                                                                    | R                                | 0      | Mitochondria          |
| etfrd                | Electron transfer flavoprotein reduced                                                                      |                                                                                                                                                                                                                                                                    | RH2                              | 0      | Mitochondria          |
| etfa                 | Ethanolamine                                                                                                | Aminoethanol, Hydroxyethylamine                                                                                                                                                                                                                                    | C2H8NO                           | 1      | Cytosol               |
| ethamp               | Ethanolamine phosphate                                                                                      | O-Phosphoethanolamine, O-Phosphorylethanolamine, Phosphoethanolamine                                                                                                                                                                                               | C2H7NO4P                         | -1     | Cytosol               |



| Abbreviation | Metabolite Name                                                                                                                                                                                                                                  | Synonyms                                                                                                                                                               | Formula        | Charge | Compartment           |
|--------------|--------------------------------------------------------------------------------------------------------------------------------------------------------------------------------------------------------------------------------------------------|------------------------------------------------------------------------------------------------------------------------------------------------------------------------|----------------|--------|-----------------------|
| ethamp       | Ethanolamine phosphate                                                                                                                                                                                                                           | O-Phosphoethanolamine, O-Phosphorylethanolamine, Phosphoethanolamine                                                                                                   | C2H7NO4P       | -1     | Endoplasmic Reticulum |
| etoh         | Ethanol                                                                                                                                                                                                                                          | Ethyl alcohol, Methylcarbinol                                                                                                                                          | C2H6O          | 0      | Cytosol               |
| etoh         | Ethanol                                                                                                                                                                                                                                          | Ethyl alcohol, Methylcarbinol                                                                                                                                          | C2H6O          | 0      | Extracellular         |
| etoh         | Ethanol                                                                                                                                                                                                                                          | Ethyl alcohol, Methylcarbinol                                                                                                                                          | C2H6O          | 0      | Peroxisome            |
| f1a          | F1alpha                                                                                                                                                                                                                                          |                                                                                                                                                                        | C22H37N2O15X   | 0      | Golgi Apparatus       |
| f1a          | F1alpha                                                                                                                                                                                                                                          |                                                                                                                                                                        | C22H37N2O15X   | 0      | Lysosome              |
| f1p          | D-Fructose 1-phosphate                                                                                                                                                                                                                           | Fructofuranose 1-phosphate, Fructose 1-phosphate                                                                                                                       | C6H11O9P       | -2     | Cytosol               |
| f26bp        | D-Fructose 2,6-bisphosphate                                                                                                                                                                                                                      |                                                                                                                                                                        | C6H10O12P2     | -4     | Cytosol               |
| f5hoxkyn     | Formyl-5-hydroxykynurenamine                                                                                                                                                                                                                     |                                                                                                                                                                        | C10H13N2O3     | 1      | Cytosol               |
| f6p          | D-Fructose 6-phosphate                                                                                                                                                                                                                           | D-Fructose 6-phosphoric acid, Neuberg ester, beta-D-Fructose 6-phosphate                                                                                               | C6H11O9P       | -2     | Cytosol               |
| fad          | Flavin adenine dinucleotide oxidized                                                                                                                                                                                                             | FAD, Flavin adenine dinucleotide, Riboflavine 5'-adenosine diphosphate                                                                                                 | C27H31N9O15P2  | -2     | Cytosol               |
| fad          | Flavin adenine dinucleotide oxidized                                                                                                                                                                                                             | FAD, Flavin adenine dinucleotide, Riboflavine 5'-adenosine diphosphate                                                                                                 | C27H31N9O15P2  | -2     | Mitochondria          |
| fad          | Flavin adenine dinucleotide oxidized                                                                                                                                                                                                             | FAD, Flavin adenine dinucleotide, Riboflavine 5'-adenosine diphosphate                                                                                                 | C27H31N9O15P2  | -2     | Endoplasmic Reticulum |
| fad          | Flavin adenine dinucleotide oxidized                                                                                                                                                                                                             | FAD, Flavin adenine dinucleotide, Riboflavine 5'-adenosine diphosphate                                                                                                 | C27H31N9O15P2  | -2     | Peroxisome            |
| fadh2        | Flavin adenine dinucleotide reduced                                                                                                                                                                                                              | flavin adenine dinucleotide (reduced form)                                                                                                                             | C27H33N9O15P2  | -2     | Cytosol               |
| fadh2        | Flavin adenine dinucleotide reduced                                                                                                                                                                                                              | flavin adenine dinucleotide (reduced form)                                                                                                                             | C27H33N9O15P2  | -2     | Mitochondria          |
| fadh2        | Flavin adenine dinucleotide reduced                                                                                                                                                                                                              | flavin adenine dinucleotide (reduced form)                                                                                                                             | C27H33N9O15P2  | -2     | Endoplasmic Reticulum |
| fadh2        | Flavin adenine dinucleotide reduced                                                                                                                                                                                                              | flavin adenine dinucleotide (reduced form)                                                                                                                             | C27H33N9O15P2  | -2     | Peroxisome            |
| fald         | Formaldehyde                                                                                                                                                                                                                                     | Formalin, Methanal, Methylene oxide, Oxomethane, Oxomethylene                                                                                                          | CH2O           | 0      | Cytosol               |
| fald         | Formaldehyde                                                                                                                                                                                                                                     | Formalin, Methanal, Methylene oxide, Oxomethane, Oxomethylene                                                                                                          | CH2O           | 0      | Lysosome              |
| fald         | Formaldehyde                                                                                                                                                                                                                                     | Formalin, Methanal, Methylene oxide, Oxomethane, Oxomethylene                                                                                                          | CH2O           | 0      | Mitochondria          |
| fald         | Formaldehyde                                                                                                                                                                                                                                     | Formalin, Methanal, Methylene oxide, Oxomethane, Oxomethylene                                                                                                          | CH2O           | 0      | Peroxisome            |
| fdp          | D-Fructose 1,6-bisphosphate                                                                                                                                                                                                                      | beta-D-fructofuranose-1,6-diphosphate, fbp, fructose diphosphate, fructose-1,6-bisphosphate                                                                            | C6H10O12P2     | -4     | Cytosol               |
| fe2          | Fe2+                                                                                                                                                                                                                                             | Fe(II), Iron, Iron dication, Reduced Iron                                                                                                                              | Fe             | 2      | Cytosol               |
| fe2          | Fe2+                                                                                                                                                                                                                                             | Fe(II), Iron, Iron dication, Reduced Iron                                                                                                                              | Fe             | 2      | Extracellular         |
| fe2          | Fe2+                                                                                                                                                                                                                                             | Fe(II), Iron, Iron dication, Reduced Iron                                                                                                                              | Fe             | 2      | Mitochondria          |
| fe3          | Fe3+                                                                                                                                                                                                                                             | Fe(III), Iron trication                                                                                                                                                | Fe             | 3      | Extracellular         |
| fgam         | N2-Formyl-N1-(5-phospho-D-ribose)glycinamide                                                                                                                                                                                                     | 5'-Phosphoribosyl-N-formylglycinamide, N-FormylGAR, N-Formylglycinamide ribonucleotide                                                                                 | C8H13N2O9P     | -2     | Cytosol               |
| fcycC        | Ferricytochrome c                                                                                                                                                                                                                                |                                                                                                                                                                        | C42H54FeN8O6S2 | 3      | Mitochondria          |
| fmn          | FMN                                                                                                                                                                                                                                              | Flavin mononucleotide, Riboflavin-5-phosphate                                                                                                                          | C17H19N4O9P    | -2     | Cytosol               |
| fn2m2masn    | N4-[N-Acetyl-beta-D-glucosaminy]-(1,2)-alpha-D-mannosyl-(1,3)-[N-acetyl-beta-D-glucosaminy]-(1,2)-alpha-D-mannosyl-(1,6)-beta-D-mannosyl-(1,4)-N-acetyl-beta-D-glucosaminy]-(1,4)-[alpha-L-fucosyl-(1,6)]-N-acetyl-beta-D-glucosaminy]asparagine |                                                                                                                                                                        | C56H93N4O39X   | 0      | Golgi Apparatus       |
| fna5moxam    | Formyl-N-acetyl-5-methoxykynurenamine                                                                                                                                                                                                            |                                                                                                                                                                        | C13H16N2O4     | 0      | Cytosol               |
| foctC        | Ferrocyclochrome C                                                                                                                                                                                                                               |                                                                                                                                                                        | C42H54FeN8O6S2 | 2      | Mitochondria          |
| fol          | Folate                                                                                                                                                                                                                                           | Folic acid, Pteroylglutamic acid                                                                                                                                       | C19H18N7O6     | -1     | Cytosol               |
| fol          | Folate                                                                                                                                                                                                                                           | Folic acid, Pteroylglutamic acid                                                                                                                                       | C19H18N7O6     | -1     | Extracellular         |
| for          | Formate                                                                                                                                                                                                                                          | Formic acid, Hydrogencarboxylic acid, Methanoic acid, aminic acid                                                                                                      | CH1O2          | -1     | Cytosol               |
| for          | Formate                                                                                                                                                                                                                                          | Formic acid, Hydrogencarboxylic acid, Methanoic acid, aminic acid                                                                                                      | CH1O2          | -1     | Extracellular         |
| for          | Formate                                                                                                                                                                                                                                          | Formic acid, Hydrogencarboxylic acid, Methanoic acid, aminic acid                                                                                                      | CH1O2          | -1     | Mitochondria          |
| for          | Formate                                                                                                                                                                                                                                          | Formic acid, Hydrogencarboxylic acid, Methanoic acid, aminic acid                                                                                                      | CH1O2          | -1     | Nucleus               |
| for          | Formate                                                                                                                                                                                                                                          | Formic acid, Hydrogencarboxylic acid, Methanoic acid, aminic acid                                                                                                      | CH1O2          | -1     | Endoplasmic Reticulum |
| forglu       | N-Formimidoyl-L-glutamate                                                                                                                                                                                                                        | N-Formimino-L-glutamate                                                                                                                                                | C6H8N2O4       | -2     | Cytosol               |
| formcoa      | Formyl-CoA                                                                                                                                                                                                                                       |                                                                                                                                                                        | C22H36N7O17P3S | 0      | Cytosol               |
| formcoa      | Formyl-CoA                                                                                                                                                                                                                                       |                                                                                                                                                                        | C22H36N7O17P3S | 0      | Peroxisome            |
| fpram        | 2-(Formamido)-N1-(5-phospho-D-ribose)acetamidine                                                                                                                                                                                                 | 1-(5'-Phosphoribosyl)-N-formylglycinamide, 2-(Formamido)-N1-(5'-phosphoribosyl)acetamidine, Phosphoribosyl-N-formylglycinamide, 5'-Phosphoribosylformylglycinamide     | C8H15N3O8P     | -1     | Cytosol               |
| fpica        | 5-Formamido-1-(5-phospho-D-ribose)imidazole-4-carboxamide                                                                                                                                                                                        | 1-(5'-Phosphoribosyl)-5-formamido-4-imidazolecarboxamide, 5'-Phosphoribosyl-5-formamido-4-imidazolecarboxamide, 5-Formamid-1-(5-phosphoribosyl)imidazole-4-carboxamide | C10H13N4O9P    | -2     | Cytosol               |
| frdp         | Farnesyl diphosphate                                                                                                                                                                                                                             | 2-trans,6-trans-Farnesyl diphosphate, FPP, Farnesyl pyrophosphate, trans,trans-Farnesyl diphosphate                                                                    | C15H25O7P2     | -3     | Cytosol               |
| frdp         | Farnesyl diphosphate                                                                                                                                                                                                                             | 2-trans,6-trans-Farnesyl diphosphate, FPP, Farnesyl pyrophosphate, trans,trans-Farnesyl diphosphate                                                                    | C15H25O7P2     | -3     | Endoplasmic Reticulum |
| frdp         | Farnesyl diphosphate                                                                                                                                                                                                                             | 2-trans,6-trans-Farnesyl diphosphate, FPP, Farnesyl pyrophosphate, trans,trans-Farnesyl diphosphate                                                                    | C15H25O7P2     | -3     | Peroxisome            |

| Abbreviation                                    | Metabolite Name                                  | Synonyms                                                                                                                               | Formula             | Charge | Compartment     |
|-------------------------------------------------|--------------------------------------------------|----------------------------------------------------------------------------------------------------------------------------------------|---------------------|--------|-----------------|
| fru                                             | D-Fructose                                       | D-Arabino-hexulose, Fruit sugar, Levulose                                                                                              | C6H12O6             | 0      | Cytosol         |
| fru                                             | D-Fructose                                       | D-Arabino-hexulose, Fruit sugar, Levulose                                                                                              | C6H12O6             | 0      | Extracellular   |
| fuc12gal14aclegalguside_hs                      | Type IIIH glycolipid                             | (Gal)2 (Glc)1 (GlcNAc)1 (LFuc)1 (Cer)1, IV2-a-Fuc-nLc4Cer, IV2Fuc-nLc4Cer                                                              | C50H89N2O26FULLRCO  | 0      | Golgi Apparatus |
| fuc132galacleggal14aclegalguside_hs             | V3Fuc-nLc6Cer                                    | (Gal)3 (Glc)1 (GlcNAc)2 (LFuc)1 (Cer)1, Lex                                                                                            | C64H112N3O36FULLRCO | 0      | Golgi Apparatus |
| fuc13galacleggal14aclegalguside_hs              | III3Fuc-nLc6Cer                                  | (Gal)3 (Glc)1 (GlcNAc)2 (LFuc)1 (Cer)1                                                                                                 | C64H112N3O36FULLRCO | 0      | Cytosol         |
| fuc13galacleggal14aclegalguside_hs              | III3Fuc-nLc6Cer                                  | (Gal)3 (Glc)1 (GlcNAc)2 (LFuc)1 (Cer)1                                                                                                 | C64H112N3O36FULLRCO | 0      | Extracellular   |
| fuc13galacleggal14aclegalguside_hs              | III3Fuc-nLc6Cer                                  | (Gal)3 (Glc)1 (GlcNAc)2 (LFuc)1 (Cer)1                                                                                                 | C64H112N3O36FULLRCO | 0      | Golgi Apparatus |
| fuc14galaclegalguside_hs                        | Lea glycolipid                                   | (Gal)2 (Glc)1 (GlcNAc)1 (LFuc)1 (Cer)1, Fuc-Lc4Cer, III4-a-Fuc-Lc4Cer                                                                  | C50H89N2O26FULLRCO  | 0      | Cytosol         |
| fuc14galaclegalguside_hs                        | Lea glycolipid                                   | (Gal)2 (Glc)1 (GlcNAc)1 (LFuc)1 (Cer)1, Fuc-Lc4Cer, III4-a-Fuc-Lc4Cer                                                                  | C50H89N2O26FULLRCO  | 0      | Extracellular   |
| fuc14galaclegalguside_hs                        | Lea glycolipid                                   | (Gal)2 (Glc)1 (GlcNAc)1 (LFuc)1 (Cer)1, Fuc-Lc4Cer, III4-a-Fuc-Lc4Cer                                                                  | C50H89N2O26FULLRCO  | 0      | Golgi Apparatus |
| fuc1p-L                                         | L-Fucose 1-phosphate                             | 6-Deoxy-L-galactose 1-phosphate, L-Fucose 1-phosphate                                                                                  | C6H11O8P            | -2     | Cytosol         |
| fucacgalfucgalaclegalguside_hs                  | (Gal)2 (GalNAc)1 (Glc)1 (GlcNAc)1 (LFuc)2 (Cer)1 | ALeb                                                                                                                                   | C64H112N3O35FULLRCO | 0      | Cytosol         |
| fucacgalfucgalaclegalguside_hs                  | (Gal)2 (GalNAc)1 (Glc)1 (GlcNAc)1 (LFuc)2 (Cer)1 | ALeb                                                                                                                                   | C64H112N3O35FULLRCO | 0      | Extracellular   |
| fucacgalfucgalaclegalguside_hs                  | (Gal)2 (GalNAc)1 (Glc)1 (GlcNAc)1 (LFuc)2 (Cer)1 | ALeb                                                                                                                                   | C64H112N3O35FULLRCO | 0      | Golgi Apparatus |
| fucacngal14aclegalguside_hs                     | IV3-a-NeuAc, III3-a-Fuc-nLc4Cer                  | (Gal)2 (Glc)1 (GlcNAc)1 (LFuc)1 (Neu5Ac)1 (Cer)1, IV3-a-NeuAc, III3-a-Fuc-nLc4Cer, IV3NeuAc, III3Fuc-nLc4Cer                           | C61H105N3O34FULLRCO | -1     | Cytosol         |
| fucacngal14aclegalguside_hs                     | IV3-a-NeuAc, III3-a-Fuc-nLc4Cer                  | (Gal)2 (Glc)1 (GlcNAc)1 (LFuc)1 (Neu5Ac)1 (Cer)1, IV3-a-NeuAc, III3-a-Fuc-nLc4Cer, IV3NeuAc, III3Fuc-nLc4Cer                           | C61H105N3O34FULLRCO | -1     | Extracellular   |
| fucacngal14aclegalguside_hs                     | IV3-a-NeuAc, III3-a-Fuc-nLc4Cer                  | (Gal)2 (Glc)1 (GlcNAc)1 (LFuc)1 (Neu5Ac)1 (Cer)1, IV3-a-NeuAc, III3-a-Fuc-nLc4Cer, IV3NeuAc, III3Fuc-nLc4Cer                           | C61H105N3O34FULLRCO | -1     | Golgi Apparatus |
| fucacngalaclegalguside_hs                       | IV3-a-Neu5Ac, III4-a-Fuc-Lc4Cer                  | (Gal)2 (Glc)1 (GlcNAc)1 (LFuc)1 (Neu5Ac)1 (Cer)1, Fuc-3-isoLM1                                                                         | C61H105N3O34FULLRCO | -1     | Cytosol         |
| fucacngalaclegalguside_hs                       | IV3-a-Neu5Ac, III4-a-Fuc-Lc4Cer                  | (Gal)2 (Glc)1 (GlcNAc)1 (LFuc)1 (Neu5Ac)1 (Cer)1, Fuc-3-isoLM1                                                                         | C61H105N3O34FULLRCO | -1     | Extracellular   |
| fucacngalaclegalguside_hs                       | IV3-a-Neu5Ac, III4-a-Fuc-Lc4Cer                  | (Gal)2 (Glc)1 (GlcNAc)1 (LFuc)1 (Neu5Ac)1 (Cer)1, Fuc-3-isoLM1                                                                         | C61H105N3O34FULLRCO | -1     | Golgi Apparatus |
| fucfuc12gal14aclegalguside_hs                   | Ley glycolipid                                   | (Gal)2 (Glc)1 (GlcNAc)1 (LFuc)2 (Cer)1, III3, IV2Fuc-nLc4Cer, IV2-a-Fuc, III3-a-Fuc-nLc4Cer                                            | C56H99N2O30FULLRCO  | 0      | Cytosol         |
| fucfuc12gal14aclegalguside_hs                   | Ley glycolipid                                   | (Gal)2 (Glc)1 (GlcNAc)1 (LFuc)2 (Cer)1, III3, IV2Fuc-nLc4Cer, IV2-a-Fuc, III3-a-Fuc-nLc4Cer                                            | C56H99N2O30FULLRCO  | 0      | Extracellular   |
| fucfuc12gal14aclegalguside_hs                   | Ley glycolipid                                   | (Gal)2 (Glc)1 (GlcNAc)1 (LFuc)2 (Cer)1, III3, IV2Fuc-nLc4Cer, IV2-a-Fuc, III3-a-Fuc-nLc4Cer                                            | C56H99N2O30FULLRCO  | 0      | Golgi Apparatus |
| fucfuc132galacleggal14aclegalguside_hs          | V3Fuc, III3Fuc-nLc6Cer                           | (Gal)3 (Glc)1 (GlcNAc)2 (LFuc)2 (Cer)1, dimeric Lex                                                                                    | C70H122N3O40FULLRCO | 0      | Cytosol         |
| fucfuc132galacleggal14aclegalguside_hs          | V3Fuc, III3Fuc-nLc6Cer                           | (Gal)3 (Glc)1 (GlcNAc)2 (LFuc)2 (Cer)1, dimeric Lex                                                                                    | C70H122N3O40FULLRCO | 0      | Extracellular   |
| fucfuc132galacleggal14aclegalguside_hs          | V3Fuc, III3Fuc-nLc6Cer                           | (Gal)3 (Glc)1 (GlcNAc)2 (LFuc)2 (Cer)1, dimeric Lex                                                                                    | C70H122N3O40FULLRCO | 0      | Golgi Apparatus |
| fucfucfucgalacleg13galaclegal14aclegalguside_hs | (Gal)4 (Glc)1 (GlcNAc)3 (LFuc)3 (Cer)1           | trimeric Lex                                                                                                                           | C90H155N4O54FULLRCO | 0      | Cytosol         |
| fucfucfucgalacleg13galaclegal14aclegalguside_hs | (Gal)4 (Glc)1 (GlcNAc)3 (LFuc)3 (Cer)1           | trimeric Lex                                                                                                                           | C90H155N4O54FULLRCO | 0      | Extracellular   |
| fucfucfucgalacleg13galaclegal14aclegalguside_hs | (Gal)4 (Glc)1 (GlcNAc)3 (LFuc)3 (Cer)1           | trimeric Lex                                                                                                                           | C90H155N4O54FULLRCO | 0      | Golgi Apparatus |
| fucfucfucgalacleggal14aclegalguside_hs          | (Gal)3 (Glc)1 (GlcNAc)2 (LFuc)3 (Cer)1           |                                                                                                                                        | C76H132N3O44FULLRCO | 0      | Cytosol         |
| fucfucfucgalacleggal14aclegalguside_hs          | (Gal)3 (Glc)1 (GlcNAc)2 (LFuc)3 (Cer)1           |                                                                                                                                        | C76H132N3O44FULLRCO | 0      | Extracellular   |
| fucfucfucgalacleggal14aclegalguside_hs          | (Gal)3 (Glc)1 (GlcNAc)2 (LFuc)3 (Cer)1           |                                                                                                                                        | C76H132N3O44FULLRCO | 0      | Golgi Apparatus |
| fucfucgalacleg13galaclegal14aclegalguside_hs    | (Gal)4 (Glc)1 (GlcNAc)3 (LFuc)2 (Cer)1           | dimeric Lex                                                                                                                            | C84H145N4O50FULLRCO | 0      | Golgi Apparatus |
| fucfucgalacleggal14aclegalguside_hs             | (Gal)3 (Glc)1 (GlcNAc)2 (LFuc)2 (Cer)1           |                                                                                                                                        | C70H122N3O40FULLRCO | 0      | Golgi Apparatus |
| fucfucgalacleggalacleggal14aclegalguside_hs     | (Gal)4 (Glc)1 (GlcNAc)3 (LFuc)2 (Cer)1           |                                                                                                                                        | C84H145N4O50FULLRCO | 0      | Golgi Apparatus |
| fucfucgalaclegalguside_hs                       | Leb glycolipid                                   | (Gal)2 (Glc)1 (GlcNAc)1 (LFuc)2 (Cer)1, IV2-a-Fuc, III4-a-Fuc-Lc4Cer, IV2Fuc, III4Fuc-Lc4Cer                                           | C56H99N2O30FULLRCO  | 0      | Cytosol         |
| fucfucgalaclegalguside_hs                       | Leb glycolipid                                   | (Gal)2 (Glc)1 (GlcNAc)1 (LFuc)2 (Cer)1, IV2-a-Fuc, III4-a-Fuc-Lc4Cer, IV2Fuc, III4Fuc-Lc4Cer                                           | C56H99N2O30FULLRCO  | 0      | Extracellular   |
| fucfucgalaclegalguside_hs                       | Leb glycolipid                                   | (Gal)2 (Glc)1 (GlcNAc)1 (LFuc)2 (Cer)1, IV2-a-Fuc, III4-a-Fuc-Lc4Cer, IV2Fuc, III4Fuc-Lc4Cer                                           | C56H99N2O30FULLRCO  | 0      | Golgi Apparatus |
| fuegal14aclegalguside_hs                        | Lacto-N-fucopentaosyl III ceramide               | (Gal)2 (Glc)1 (GlcNAc)1 (LFuc)1 (Cer)1, III3-a-Fuc-nLc4Cer, III3Fuc-nLc4Cer, LNF III cer., Lacto-N-fucopentaosyl III ceramide., SSEA-1 | C50H89N2O26FULLRCO  | 0      | Cytosol         |

| Abbreviation                                | Metabolite Name                                                                                                     | Synonyms                                                                                                                              | Formula              | Charge | Compartment           |
|---------------------------------------------|---------------------------------------------------------------------------------------------------------------------|---------------------------------------------------------------------------------------------------------------------------------------|----------------------|--------|-----------------------|
| fucgal14acglegalgluside_hs                  | Lacto-N-fucopentaosyl III ceramide                                                                                  | (Gal)2 (Glc)1 (GlcNAc)1 (LFuc)1 (Cer)1, III3-a-Fuc-nLc4Cer, III3Fuc-nLc4Cer, LNF III cer., Lacto-N-fucopentaosyl III ceramide, SSEA-1 | C50H89N2O26FULLRCO   | 0      | Extracellular         |
| fucgal14acglegalgluside_hs                  | Lacto-N-fucopentaosyl III ceramide                                                                                  | (Gal)2 (Glc)1 (GlcNAc)1 (LFuc)1 (Cer)1, III3-a-Fuc-nLc4Cer, III3Fuc-nLc4Cer, LNF III cer., Lacto-N-fucopentaosyl III ceramide, SSEA-1 | C50H89N2O26FULLRCO   | 0      | Golgi Apparatus       |
| fucgalacalfuc12gal14acglegalgluside_hs      | Type IIIH glycolipid                                                                                                | (Gal)3 (GalNAc)1 (Glc)1 (GlcNAc)2 (LFuc)2 (Cer)1                                                                                      | C70H122N3O40FULLRCO  | 0      | Golgi Apparatus       |
| fucgalacalfucgalaclegal14acglegalgluside_hs | (Gal)4 (GalNAc)1 (Glc)1 (GlcNAc)2 (LFuc)2 (Cer)1                                                                    |                                                                                                                                       | C84H145N4O50FULLRCO  | 0      | Golgi Apparatus       |
| fucgalac1e13galaclegal14acglegalgluside_hs  | (Gal)4 (Glc)1 (GlcNAc)3 (LFuc)1 (Cer)1                                                                              | Lex                                                                                                                                   | C78H135N4O46FULLRCO  | 0      | Golgi Apparatus       |
| fucgalaclegal14acglegalgluside_hs           | VI2Fuc-nLc6                                                                                                         | (Gal)3 (Glc)1 (GlcNAc)2 (LFuc)1 (Cer)1                                                                                                | C64H112N3O36FULLRCO  | 0      | Golgi Apparatus       |
| fucgalaclegalgluside_hs                     | Type III glycolipid                                                                                                 | (Gal)2 (Glc)1 (GlcNAc)1 (LFuc)1 (Cer)1, IV2-a-Fuc-Lc4Cer, IV2Fuc-Lc4Cer                                                               | C50H89N2O26FULLRCO   | 0      | Golgi Apparatus       |
| fucalfucgalaclegalgluside_hs                | (Gal)3 (Glc)1 (GlcNAc)1 (LFuc)2 (Cer)1                                                                              |                                                                                                                                       | C62H109N2O35FULLRCO  | 0      | Cytosol               |
| fucalfucgalaclegalgluside_hs                | (Gal)3 (Glc)1 (GlcNAc)1 (LFuc)2 (Cer)1                                                                              |                                                                                                                                       | C62H109N2O35FULLRCO  | 0      | Extracellular         |
| fucalfucgalaclegalgluside_hs                | (Gal)3 (Glc)1 (GlcNAc)1 (LFuc)2 (Cer)1                                                                              |                                                                                                                                       | C62H109N2O35FULLRCO  | 0      | Golgi Apparatus       |
| fucalghside_hs                              | fucosyl galactosylglucoside (homo sapiens)                                                                          | (Gal)3 (GalNAc)1 (Glc)1 (LFuc)1 (Cer)1, Fuc-Gal globoside, Globo-H                                                                    | C56H99N2O31FULLRCO   | 0      | Cytosol               |
| fucalghside_hs                              | fucosyl galactosylglucoside (homo sapiens)                                                                          | (Gal)3 (GalNAc)1 (Glc)1 (LFuc)1 (Cer)1, Fuc-Gal globoside, Globo-H                                                                    | C56H99N2O31FULLRCO   | 0      | Extracellular         |
| fucalghside_hs                              | fucosyl galactosylglucoside (homo sapiens)                                                                          | (Gal)3 (GalNAc)1 (Glc)1 (LFuc)1 (Cer)1, Fuc-Gal globoside, Globo-H                                                                    | C56H99N2O31FULLRCO   | 0      | Golgi Apparatus       |
| fuc-L                                       | L-Fucose                                                                                                            | 6-Deoxy-L-galactose                                                                                                                   | C6H12O5              | 0      | Cytosol               |
| fuc-L                                       | L-Fucose                                                                                                            | 6-Deoxy-L-galactose                                                                                                                   | C6H12O5              | 0      | Extracellular         |
| fuc-L                                       | L-Fucose                                                                                                            | 6-Deoxy-L-galactose                                                                                                                   | C6H12O5              | 0      | Lysosome              |
| fum                                         | Fumarate                                                                                                            | Fumaric acid, Trans-butenedioic acid, allomaleic acid, boletic acid                                                                   | C4H2O4               | -2     | Cytosol               |
| fum                                         | Fumarate                                                                                                            | Fumaric acid, Trans-butenedioic acid, allomaleic acid, boletic acid                                                                   | C4H2O4               | -2     | Mitochondria          |
| g1m6masnB1                                  | glucosyl-(alpha-D-mannosyl)6-beta-D-mannosyl-diacetylchitobiosyl-L-asparagine (protein)                             |                                                                                                                                       | C64H107N2O50X        | 0      | Golgi Apparatus       |
| g1m6masnB1                                  | glucosyl-(alpha-D-mannosyl)6-beta-D-mannosyl-diacetylchitobiosyl-L-asparagine (protein)                             |                                                                                                                                       | C64H107N2O50X        | 0      | Endoplasmic Reticulum |
| g1m7masnB                                   | glucosyl-(alpha-D-mannosyl)7-beta-D-mannosyl-diacetylchitobiosyl-L-asparagine, isoform B (protein)                  |                                                                                                                                       | C70H117N2O55X        | 0      | Golgi Apparatus       |
| g1m7masnB                                   | glucosyl-(alpha-D-mannosyl)7-beta-D-mannosyl-diacetylchitobiosyl-L-asparagine, isoform B (protein)                  |                                                                                                                                       | C70H117N2O55X        | 0      | Endoplasmic Reticulum |
| g1m7masnC                                   | glucosyl-(alpha-D-mannosyl)7-beta-D-mannosyl-diacetylchitobiosyl-L-asparagine, isoform C (protein)                  |                                                                                                                                       | C70H117N2O55X        | 0      | Golgi Apparatus       |
| g1m7masnC                                   | glucosyl-(alpha-D-mannosyl)7-beta-D-mannosyl-diacetylchitobiosyl-L-asparagine, isoform C (protein)                  |                                                                                                                                       | C70H117N2O55X        | 0      | Endoplasmic Reticulum |
| g1m8masn                                    | (alpha-D-Glucosyl)-(alpha-D-mannosyl)8-beta-D-mannosyl-diacetylchitobiosyl-L-asparagine (protein)                   |                                                                                                                                       | C76H127N2O60X        | 0      | Golgi Apparatus       |
| g1m8masn                                    | (alpha-D-Glucosyl)-(alpha-D-mannosyl)8-beta-D-mannosyl-diacetylchitobiosyl-L-asparagine (protein)                   |                                                                                                                                       | C76H127N2O60X        | 0      | Endoplasmic Reticulum |
| g1m8mpdol_L                                 | alpha-D-Glucosyl-(alpha-D-mannosyl)8-beta-D-mannosyl-diacetylchitobiosyldiphosphodolichol, human liver homolog      |                                                                                                                                       | C1840H3028N200670P20 | -20    | Endoplasmic Reticulum |
| g1m8mpdol_U                                 | alpha-D-Glucosyl-(alpha-D-mannosyl)8-beta-D-mannosyl-diacetylchitobiosyldiphosphodolichol, human uterine homolog    |                                                                                                                                       | C1785H2940N200670P20 | -20    | Endoplasmic Reticulum |
| g1p                                         | D-Glucose 1-phosphate                                                                                               | Cori ester, Glucose 1-phosphate, alpha-D-Glucose phosphate                                                                            | C6H11O9P             | -2     | Cytosol               |
| g2m8masn                                    | (alpha-D-Glucosyl)2-(alpha-D-mannosyl)8-beta-D-mannosyl-diacetylchitobiosyl-L-asparagine (protein)                  |                                                                                                                                       | C82H137N2O65X        | 0      | Golgi Apparatus       |
| g2m8masn                                    | (alpha-D-Glucosyl)2-(alpha-D-mannosyl)8-beta-D-mannosyl-diacetylchitobiosyl-L-asparagine (protein)                  |                                                                                                                                       | C82H137N2O65X        | 0      | Endoplasmic Reticulum |
| g2m8mpdol_L                                 | (alpha-D-Glucosyl)2-(alpha-D-mannosyl)8-beta-D-mannosyl-diacetylchitobiosyldiphosphodolichol, human liver homolog   |                                                                                                                                       | C1900H3128N200720P20 | -20    | Endoplasmic Reticulum |
| g2m8mpdol_U                                 | (alpha-D-Glucosyl)2-(alpha-D-mannosyl)8-beta-D-mannosyl-diacetylchitobiosyldiphosphodolichol, human uterine homolog |                                                                                                                                       | C1845H3040N200720P20 | -20    | Endoplasmic Reticulum |
| g3m8masn                                    | (alpha-D-Glucosyl)3-(alpha-D-mannosyl)8-beta-D-mannosyl-diacetylchitobiosyl-L-asparagine (protein)                  |                                                                                                                                       | C88H147N2O70X        | 0      | Golgi Apparatus       |
| g3m8masn                                    | (alpha-D-Glucosyl)3-(alpha-D-mannosyl)8-beta-D-mannosyl-diacetylchitobiosyl-L-asparagine (protein)                  |                                                                                                                                       | C88H147N2O70X        | 0      | Endoplasmic Reticulum |
| g3m8mpdol_L                                 | (alpha-D-Glucosyl)3-(alpha-D-mannosyl)8-beta-D-mannosyl-diacetylchitobiosyldiphosphodolichol, human liver homolog   |                                                                                                                                       | C1960H3228N200770P20 | -20    | Endoplasmic Reticulum |
| g3m8mpdol_U                                 | (alpha-D-Glucosyl)3-(alpha-D-mannosyl)8-beta-D-mannosyl-diacetylchitobiosyldiphosphodolichol, human uterine homolog |                                                                                                                                       | C1905H3140N200770P20 | -20    | Endoplasmic Reticulum |

| Abbreviation                                    | Metabolite Name                         | Synonyms                                                                                                                                           | Formula              | Charge | Compartment           |
|-------------------------------------------------|-----------------------------------------|----------------------------------------------------------------------------------------------------------------------------------------------------|----------------------|--------|-----------------------|
| g3p                                             | Glyceraldehyde 3-phosphate              | (2R)-2-Hydroxy-3-(phosphonoxy)-propanal, D-glyceraldehyde 3-phosphate                                                                              | C3H5O6P              | -2     | Cytosol               |
| g3pc                                            | sn-Glycerol-3-phosphocholine            | Glycerophosphocholine                                                                                                                              | C8H20NO6P            | 0      | Cytosol               |
| g6p                                             | D-Glucose 6-phosphate                   | Glucose 6-phosphate, Robinson ester, alpha-D-Glucose 6-phosphate                                                                                   | C6H11O9P             | -2     | Cytosol               |
| g6p                                             | D-Glucose 6-phosphate                   | Glucose 6-phosphate, Robinson ester, alpha-D-Glucose 6-phosphate                                                                                   | C6H11O9P             | -2     | Endoplasmic Reticulum |
| gal_hs                                          | GA1 (homo sapiens)                      | (Gal)2 (GalNAc)1 (Glc)1 (Cer)1                                                                                                                     | C44H79N2O22FULLRCO   | 0      | Golgi Apparatus       |
| ga2_hs                                          | GA2 (homo sapiens)                      | (Gal)1 (GalNAc)1 (Glc)1 (Cer)1                                                                                                                     | C38H69N2O17FULLRCO   | 0      | Golgi Apparatus       |
| gacpai_hs                                       | glucosaminyl-acylphosphatidylinositol   | GlcN-acylPI                                                                                                                                        | C31H58NO14PFULLR2CO2 | 0      | Cytosol               |
| gacpai_hs                                       | glucosaminyl-acylphosphatidylinositol   | GlcN-acylPI                                                                                                                                        | C31H58NO14PFULLR2CO2 | 0      | Endoplasmic Reticulum |
| gal                                             | D-Galactose                             | Galactose, alpha-Galactose(D)                                                                                                                      | C6H12O6              | 0      | Cytosol               |
| gal                                             | D-Galactose                             | Galactose, alpha-Galactose(D)                                                                                                                      | C6H12O6              | 0      | Extracellular         |
| gal                                             | D-Galactose                             | Galactose, alpha-Galactose(D)                                                                                                                      | C6H12O6              | 0      | Lysosome              |
| gal14aclegalgalside_hs                          | Lactoneotetraosylceramide               | (Gal)2 (Glc)1 (GlcNAc)1 (Cer)1, LA1-, Lacto-N-neotetraosylceramide, Lactoneotetraosylceramide, Neolactotetraosylceramide-, Paragloboside-, nLc6Cer | C44H79N2O22FULLRCO   | 0      | Golgi Apparatus       |
| gal1p                                           | alpha-D-Galactose 1-phosphate           | D-Galactose 1-phosphate, alpha-D-Galactose 1-phosphate                                                                                             | C6H11O9P             | -2     | Cytosol               |
| galacgalfuc12gal14aclegalgalside_hs             |                                         | (Gal)3 (GalNAc)1 (Glc)1 (GlcNAc)1 (LFuc)1 (Cer)1                                                                                                   | C64H112N3O36FULLRCO  | 0      | Golgi Apparatus       |
| galacgalfucgalaclegall14aclegalgalside_hs       |                                         | (Gal)4 (GalNAc)1 (Glc)1 (GlcNAc)2 (LFuc)1 (Cer)1                                                                                                   | C78H135N4O46FULLRCO  | 0      | Golgi Apparatus       |
| galacglc13galaclegall14aclegalgalside_hs        | nLc8Cer                                 | (Gal)4 (Glc)1 (GlcNAc)3 (Cer)1                                                                                                                     | C72H125N4O42FULLRCO  | 0      | Golgi Apparatus       |
| galacleggal14aclegalgalside_hs                  | i-antigen                               | (Gal)3 (Glc)1 (GlcNAc)2 (Cer)1, nLc6Cer;                                                                                                           | C58H102N3O32FULLRCO  | 0      | Golgi Apparatus       |
| galacleggalacleggal14aclegalgalside_hs          | i-antigen                               | (Gal)4 (Glc)1 (GlcNAc)3 (Cer)1, LacNAc-Lc6Cer, Lactosioctaosylceramide, iso-nLc8Cer;                                                               | C72H125N4O42FULLRCO  | 0      | Golgi Apparatus       |
| galacleggalgbside_hs                            | Gal-GlcNAc-Gal globoside (homo sapiens) | (Gal)4 (GalNAc)1 (Glc)1 (GlcNAc)1 (Cer)1                                                                                                           | C64H112N3O37FULLRCO  | 0      | Cytosol               |
| galacleggalgbside_hs                            | Gal-GlcNAc-Gal globoside (homo sapiens) | (Gal)4 (GalNAc)1 (Glc)1 (GlcNAc)1 (Cer)1                                                                                                           | C64H112N3O37FULLRCO  | 0      | Extracellular         |
| galacleggalgbside_hs                            | Gal-GlcNAc-Gal globoside (homo sapiens) | (Gal)4 (GalNAc)1 (Glc)1 (GlcNAc)1 (Cer)1                                                                                                           | C64H112N3O37FULLRCO  | 0      | Golgi Apparatus       |
| galacleggalgbside_hs                            | Le4Cer                                  | (Gal)2 (Glc)1 (GlcNAc)1 (Cer)1                                                                                                                     | C44H79N2O22FULLRCO   | 0      | Golgi Apparatus       |
| galfuc12gal14aclegalgalside_hs                  |                                         | (Gal)3 (Glc)1 (GlcNAc)1 (LFuc)1 (Cer)1                                                                                                             | C56H99N2O31FULLRCO   | 0      | Cytosol               |
| galfuc12gal14aclegalgalside_hs                  |                                         | (Gal)3 (Glc)1 (GlcNAc)1 (LFuc)1 (Cer)1                                                                                                             | C56H99N2O31FULLRCO   | 0      | Extracellular         |
| galfuc12gal14aclegalgalside_hs                  |                                         | (Gal)3 (Glc)1 (GlcNAc)1 (LFuc)1 (Cer)1                                                                                                             | C56H99N2O31FULLRCO   | 0      | Golgi Apparatus       |
| galfucgalacleggal14aclegalgalside_hs            |                                         | (Gal)4 (Glc)1 (GlcNAc)2 (LFuc)1 (Cer)1                                                                                                             | C70H122N3O41FULLRCO  | 0      | Cytosol               |
| galfucgalacleggal14aclegalgalside_hs            |                                         | (Gal)4 (Glc)1 (GlcNAc)2 (LFuc)1 (Cer)1                                                                                                             | C70H122N3O41FULLRCO  | 0      | Extracellular         |
| galfucgalacleggal14aclegalgalside_hs            |                                         | (Gal)4 (Glc)1 (GlcNAc)2 (LFuc)1 (Cer)1                                                                                                             | C70H122N3O41FULLRCO  | 0      | Golgi Apparatus       |
| galfucgalacleggalgalside_hs                     | Type IB glycolipid                      | (Gal)3 (Glc)1 (GlcNAc)1 (LFuc)1 (Cer)1                                                                                                             | C56H99N2O31FULLRCO   | 0      | Golgi Apparatus       |
| galgalfucgalacleggalacleggal14aclegalgalside_hs |                                         | (Gal)6 (Glc)1 (GlcNAc)3 (LFuc)2 (Cer)1                                                                                                             | C96H165N4O60FULLRCO  | 0      | Cytosol               |
| galgalfucgalacleggalacleggal14aclegalgalside_hs |                                         | (Gal)6 (Glc)1 (GlcNAc)3 (LFuc)2 (Cer)1                                                                                                             | C96H165N4O60FULLRCO  | 0      | Extracellular         |
| galgalfucgalacleggalacleggal14aclegalgalside_hs |                                         | (Gal)6 (Glc)1 (GlcNAc)3 (LFuc)2 (Cer)1                                                                                                             | C96H165N4O60FULLRCO  | 0      | Golgi Apparatus       |
| galgalgaltherm_hs                               | Gal-Gal-Gal-Gal-Glc-Cer (homo sapiens)  | Gal(alpha 1->3)-Gal(alpha 1->3)-Gal(alpha 1->3)-Gal(alpha 1->3)-Gal(alpha 1->4)-Glc(beta 1->4)-Cer, Gal-Gal-Gal-Gal-Glu-Cer                        | C54H96N3O32FULLRCO   | 0      | Cytosol               |
| galgalgaltherm_hs                               | Gal-Gal-Gal-Gal-Glc-Cer (homo sapiens)  | Gal(alpha 1->3)-Gal(alpha 1->3)-Gal(alpha 1->3)-Gal(alpha 1->3)-Gal(alpha 1->4)-Glc(beta 1->4)-Cer, Gal-Gal-Gal-Gal-Glu-Cer                        | C54H96N3O32FULLRCO   | 0      | Extracellular         |
| galgalgaltherm_hs                               | Gal-Gal-Gal-Gal-Glc-Cer (homo sapiens)  | Gal(alpha 1->3)-Gal(alpha 1->3)-Gal(alpha 1->3)-Gal(alpha 1->3)-Gal(alpha 1->4)-Glc(beta 1->4)-Cer, Gal-Gal-Gal-Gal-Glu-Cer                        | C54H96N3O32FULLRCO   | 0      | Golgi Apparatus       |
| galgaltherm_hs                                  | Gal-Gal-Gal-Gal-Glc-Cer (homo sapiens)  | Gal(alpha 1->3)-Gal(alpha 1->3)-Gal(alpha 1->4)-Glc(beta 1->4)-Cer, Gal-Gal-Gal-G-Glu-Cer                                                          | C48H86N2O27FULLRCO   | 0      | Golgi Apparatus       |
| galgbside_hs                                    | galactosylgloboside (homo sapiens)      | Gal-GalNAc-Gal-Gal-Glc-Cer, Gb5Cer, SSEA-3, galactose globoside                                                                                    | C50H89N2O27FULLRCO   | 0      | Golgi Apparatus       |
| galgalside_hs                                   | galactosyl glucosyl ceramide            | (Gal)1 (Glc)1 (Cer)1, Cer-Glc-Gal, Gal-Glc-Cer                                                                                                     | C30H56NO12FULLRCO    | 0      | Cytosol               |
| galgalside_hs                                   | galactosyl glucosyl ceramide            | (Gal)1 (Glc)1 (Cer)1, Cer-Glc-Gal, Gal-Glc-Cer                                                                                                     | C30H56NO12FULLRCO    | 0      | Golgi Apparatus       |
| galgalside_hs                                   | galactosyl glucosyl ceramide            | (Gal)1 (Glc)1 (Cer)1, Cer-Glc-Gal, Gal-Glc-Cer                                                                                                     | C30H56NO12FULLRCO    | 0      | Lysosome              |
| galside_hs                                      | galactocerebroside (homo sapiens)       | 1-beta-D-galactoceramide, Cer-Gal                                                                                                                  | C24H46NO7FULLRCO     | 0      | Cytosol               |
| galside_hs                                      | galactocerebroside (homo sapiens)       | 1-beta-D-galactoceramide, Cer-Gal                                                                                                                  | C24H46NO7FULLRCO     | 0      | Golgi Apparatus       |
| galside_hs                                      | galactocerebroside (homo sapiens)       | 1-beta-D-galactoceramide, Cer-Gal                                                                                                                  | C24H46NO7FULLRCO     | 0      | Lysosome              |
| galt                                            | Galactitol                              | Dulcitol, Dulcose                                                                                                                                  | C6H14O6              | 0      | Cytosol               |
| galtherm_hs                                     | Gal-Gal-Gal-Glc-Cer (homo sapiens)      | Gal(alpha 1->3)-Gal(alpha 1->4)-Gal(beta 1->4)-Glc(beta 1->4)-Cer, Gal-Gal-Gal-Glu-Cer                                                             | C42H76NO22FULLRCO    | 0      | Golgi Apparatus       |

| Abbreviation | Metabolite Name                                    | Synonyms                                                                                                               | Formula             | Charge | Compartment           |
|--------------|----------------------------------------------------|------------------------------------------------------------------------------------------------------------------------|---------------------|--------|-----------------------|
| gam          | D-Glucosamine                                      | 2-Amino-2-deoxy-D-glucose, Chitosamine, GlcN                                                                           | C6H14NO5            | 1      | Cytosol               |
| gam          | D-Glucosamine                                      | 2-Amino-2-deoxy-D-glucose, Chitosamine, GlcN                                                                           | C6H14NO5            | 1      | Extracellular         |
| gam6p        | D-Glucosamine 6-phosphate                          | D-Glucosamine phosphate                                                                                                | C6H13NO8P           | -1     | Cytosol               |
| gar          | N1-(5-Phospho-D-ribose1)glycinamide                | 5'-Phosphoribosylglycinamide, GAR, Glycinamide ribonucleotide                                                          | C7H14N2O8P          | -1     | Cytosol               |
| gbside_hs    | globoside (homo sapiens)                           | GalNac-Gal-Gal-Glc-Cer, Gb4Cer, P-antigen                                                                              | C44H79N2O22FULLRCO  | 0      | Cytosol               |
| gbside_hs    | globoside (homo sapiens)                           | GalNac-Gal-Gal-Glc-Cer, Gb4Cer, P-antigen                                                                              | C44H79N2O22FULLRCO  | 0      | Extracellular         |
| gbside_hs    | globoside (homo sapiens)                           | GalNac-Gal-Gal-Glc-Cer, Gb4Cer, P-antigen                                                                              | C44H79N2O22FULLRCO  | 0      | Golgi Apparatus       |
| gbside_hs    | globoside (homo sapiens)                           | GalNac-Gal-Gal-Glc-Cer, Gb4Cer, P-antigen                                                                              | C44H79N2O22FULLRCO  | 0      | Lysosome              |
| gcald        | Glycolaldehyde                                     | Hydroxyacetaldehyde                                                                                                    | C2H4O2              | 0      | Cytosol               |
| gcald        | Glycolaldehyde                                     | Hydroxyacetaldehyde                                                                                                    | C2H4O2              | 0      | Mitochondria          |
| gchola       | glycocholate                                       | 5-beta-cholanic acid-3-alpha-7-alpha-12-alpha-trio-N-(carboxymethyl)-amide, Glycocholate, Glycocholic acid, bile acid  | C26H43NO6           | 0      | Cytosol               |
| gchola       | glycocholate                                       | 5-beta-cholanic acid-3-alpha-7-alpha-12-alpha-trio-N-(carboxymethyl)-amide, Glycocholate, Glycocholic acid, bile acid  | C26H43NO6           | 0      | Extracellular         |
| gchola       | glycocholate                                       | 5-beta-cholanic acid-3-alpha-7-alpha-12-alpha-trio-N-(carboxymethyl)-amide, Glycocholate, Glycocholic acid, bile acid  | C26H43NO6           | 0      | Peroxisome            |
| gd1a_hs      | GD1a (homo sapiens)                                | (Gal)2 (GalNAc)1 (Glc)1 (Neu5Ac)2 (Cer)1                                                                               | C66H111N4O38FULLRCO | -2     | Golgi Apparatus       |
| gd1alpha_hs  | GD1a (homo sapiens)                                | (Gal)2 (GalNAc)1 (Glc)1 (Neu5Ac)2 (Cer)1                                                                               | C66H111N4O38FULLRCO | -2     | Golgi Apparatus       |
| gd1b_hs      | GD1b (homo sapiens)                                | (Gal)2 (GalNAc)1 (Glc)1 (Neu5Ac)2 (Cer)1                                                                               | C66H111N4O38FULLRCO | -2     | Golgi Apparatus       |
| gd1b2_hs     | GD1beta (homo sapiens)                             | (Gal)2 (GalNAc)1 (Glc)1 (Neu5Ac)2 (Cer)1                                                                               | C66H111N4O38FULLRCO | -2     | Cytosol               |
| gd1b2_hs     | GD1beta (homo sapiens)                             | (Gal)2 (GalNAc)1 (Glc)1 (Neu5Ac)2 (Cer)1                                                                               | C66H111N4O38FULLRCO | -2     | Extracellular         |
| gd1b2_hs     | GD1beta (homo sapiens)                             | (Gal)2 (GalNAc)1 (Glc)1 (Neu5Ac)2 (Cer)1                                                                               | C66H111N4O38FULLRCO | -2     | Golgi Apparatus       |
| gd1c_hs      | GD1c (homo sapiens)                                | (Gal)2 (GalNAc)1 (Glc)1 (Neu5Ac)2 (Cer)1                                                                               | C66H111N4O38FULLRCO | -2     | Cytosol               |
| gd1c_hs      | GD1c (homo sapiens)                                | (Gal)2 (GalNAc)1 (Glc)1 (Neu5Ac)2 (Cer)1                                                                               | C66H111N4O38FULLRCO | -2     | Extracellular         |
| gd1c_hs      | GD1c (homo sapiens)                                | (Gal)2 (GalNAc)1 (Glc)1 (Neu5Ac)2 (Cer)1                                                                               | C66H111N4O38FULLRCO | -2     | Golgi Apparatus       |
| gd2_hs       | GD2 (homo sapiens)                                 | (Gal)1 (GalNAc)1 (Glc)1 (Neu5Ac)2 (Cer)1                                                                               | C60H101N4O33FULLRCO | -2     | Golgi Apparatus       |
| gd3_hs       | GD3 (homo sapiens)                                 | (Gal)1 (Glc)1 (Neu5Ac)2 (Cer)1, CD60a                                                                                  | C52H88N3O28FULLRCO  | -2     | Cytosol               |
| gd3_hs       | GD3 (homo sapiens)                                 | (Gal)1 (Glc)1 (Neu5Ac)2 (Cer)1, CD60a                                                                                  | C52H88N3O28FULLRCO  | -2     | Golgi Apparatus       |
| gdchola      | glycochenodeoxycholate                             | Glycochenodeoxycholate, bile acid, bile salt                                                                           | C26H43NO5           | 0      | Cytosol               |
| gdchola      | glycochenodeoxycholate                             | Glycochenodeoxycholate, bile acid, bile salt                                                                           | C26H43NO5           | 0      | Extracellular         |
| gdchola      | glycochenodeoxycholate                             | Glycochenodeoxycholate, bile acid, bile salt                                                                           | C26H43NO5           | 0      | Peroxisome            |
| gdp          | GDP                                                | Guanosine 5'-diphosphate, Guanosine diphosphate                                                                        | C10H12N5O11P2       | -3     | Cytosol               |
| gdp          | GDP                                                | Guanosine 5'-diphosphate, Guanosine diphosphate                                                                        | C10H12N5O11P2       | -3     | Extracellular         |
| gdp          | GDP                                                | Guanosine 5'-diphosphate, Guanosine diphosphate                                                                        | C10H12N5O11P2       | -3     | Golgi Apparatus       |
| gdp          | GDP                                                | Guanosine 5'-diphosphate, Guanosine diphosphate                                                                        | C10H12N5O11P2       | -3     | Mitochondria          |
| gdp          | GDP                                                | Guanosine 5'-diphosphate, Guanosine diphosphate                                                                        | C10H12N5O11P2       | -3     | Nucleus               |
| gdpddman     | GDP-4-dehydro-6-deoxy-D-mannose                    | GDP-4-dehydro-6-deoxy-D-mannose, GDP-4-dehydro-6-deoxy-D-talose, GDP-4-dehydro-D-rhamnose, GDP-4-oxo-6-deoxy-D-mannose | C16H21N5O15P2       | -2     | Cytosol               |
| gdpfuc       | GDP-L-fucose                                       |                                                                                                                        | C16H23N5O15P2       | -2     | Cytosol               |
| gdpfuc       | GDP-L-fucose                                       |                                                                                                                        | C16H23N5O15P2       | -2     | Golgi Apparatus       |
| gdpmann      | GDP-D-mannose                                      |                                                                                                                        | C16H23N5O16P2       | -2     | Cytosol               |
| ggdp         | Geranylgeranyl diphosphate                         | GGPP, Geranylgeranyl pyrophosphate, all-trans-Geranylgeranyl diphosphate, all-trans-Geranylgeranyl pyrophosphate       | C20H33O7P2          | -3     | Cytosol               |
| ggn          | primed glycogenin (glycogenin-8[1,4-Glc])          |                                                                                                                        | C48H81O41X          | 0      | Cytosol               |
| glac         | D-glucurono-6,3-lactone                            |                                                                                                                        | C6H8O6              | 0      | Cytosol               |
| glac         | D-glucurono-6,3-lactone                            |                                                                                                                        | C6H8O6              | 0      | Mitochondria          |
| glac         | D-glucurono-6,3-lactone                            |                                                                                                                        | C6H8O6              | 0      | Endoplasmic Reticulum |
| gk1man       | glucose-1,3-mannose oligosaccharide                |                                                                                                                        | C12H22O11           | 0      | Golgi Apparatus       |
| gk2man       | (2)glucose-1,3-mannose oligosaccharide             |                                                                                                                        | C18H32O16           | 0      | Golgi Apparatus       |
| gk3man       | glucose-1,2-(2)glucose-1,3-mannose oligosaccharide |                                                                                                                        | C24H42O21           | 0      | Golgi Apparatus       |
| gk-D         | D-Glucose                                          | Dextrose, Glucose, Grape sugar, alpha-D-Glucose, beta-D-Glucose                                                        | C6H12O6             | 0      | Cytosol               |
| gk-D         | D-Glucose                                          | Dextrose, Glucose, Grape sugar, alpha-D-Glucose, beta-D-Glucose                                                        | C6H12O6             | 0      | Extracellular         |
| gk-D         | D-Glucose                                          | Dextrose, Glucose, Grape sugar, alpha-D-Glucose, beta-D-Glucose                                                        | C6H12O6             | 0      | Golgi Apparatus       |
| gk-D         | D-Glucose                                          | Dextrose, Glucose, Grape sugar, alpha-D-Glucose, beta-D-Glucose                                                        | C6H12O6             | 0      | Lysosome              |
| gk-D         | D-Glucose                                          | Dextrose, Glucose, Grape sugar, alpha-D-Glucose, beta-D-Glucose                                                        | C6H12O6             | 0      | Endoplasmic Reticulum |
| gkr          | D-Glucarate                                        | D-Gluconic acid, D-Glucosaccharic acid, D-Saccharic acid, L-Gularic acid                                               | C6H8O8              | -2     | Cytosol               |

| Abbreviation | Metabolite Name                                                 | Synonyms                                                                                   | Formula            | Charge | Compartment           |
|--------------|-----------------------------------------------------------------|--------------------------------------------------------------------------------------------|--------------------|--------|-----------------------|
| glcr         | D-Glucarate                                                     | D-Glucaric acid, D-Glucosaccharic acid, D-Saccharic acid, L-Gularic acid                   | C6H8O8             | -2     | Mitochondria          |
| glcur        | D-Glucuronate                                                   | GlcA, Glucuronate, Glucuronic acid                                                         | C6H9O7             | -1     | Cytosol               |
| glcur        | D-Glucuronate                                                   | GlcA, Glucuronate, Glucuronic acid                                                         | C6H9O7             | -1     | Lysosome              |
| glcur        | D-Glucuronate                                                   | GlcA, Glucuronate, Glucuronic acid                                                         | C6H9O7             | -1     | Endoplasmic Reticulum |
| glcur1p      | D-Glucuronate 1-phosphate                                       | GlcA-1P                                                                                    | C6H8O10P           | -3     | Cytosol               |
| gln-L        | L-Glutamine                                                     | Gln, L-2-Aminoglutaramic acid                                                              | C5H10N2O3          | 0      | Cytosol               |
| gln-L        | L-Glutamine                                                     | Gln, L-2-Aminoglutaramic acid                                                              | C5H10N2O3          | 0      | Extracellular         |
| gln-L        | L-Glutamine                                                     | Gln, L-2-Aminoglutaramic acid                                                              | C5H10N2O3          | 0      | Mitochondria          |
| glu5p        | L-Glutamate 5-phosphate                                         | L-Glutamyl 5-phosphate                                                                     | C5H8NO7P           | -2     | Mitochondria          |
| glu5sa       | L-Glutamate 5-semialdehyde                                      | L-Glutamate gamma-semialdehyde                                                             | C5H9NO3            | 0      | Cytosol               |
| glu5sa       | L-Glutamate 5-semialdehyde                                      | L-Glutamate gamma-semialdehyde                                                             | C5H9NO3            | 0      | Mitochondria          |
| gluala       | 5-L-Glutamyl-L-alanine                                          |                                                                                            | C8H13N2O5          | -1     | Extracellular         |
| glucys       | gamma-L-Glutamyl-L-cysteine                                     | 5-L-Glutamyl-L-cysteine, L-gamma-Glutamylcysteine                                          | C8H13N2O5S         | -1     | Cytosol               |
| glu-L        | L-Glutamate                                                     | Glu, L-Glutamic acid, L-Glutaminic acid                                                    | C5H8NO4            | -1     | Cytosol               |
| glu-L        | L-Glutamate                                                     | Glu, L-Glutamic acid, L-Glutaminic acid                                                    | C5H8NO4            | -1     | Extracellular         |
| glu-L        | L-Glutamate                                                     | Glu, L-Glutamic acid, L-Glutaminic acid                                                    | C5H8NO4            | -1     | Lysosome              |
| glu-L        | L-Glutamate                                                     | Glu, L-Glutamic acid, L-Glutaminic acid                                                    | C5H8NO4            | -1     | Mitochondria          |
| glu-L        | L-Glutamate                                                     | Glu, L-Glutamic acid, L-Glutaminic acid                                                    | C5H8NO4            | -1     | Endoplasmic Reticulum |
| gluside_hs   | glucocerebroside (homo sapiens)                                 | 1-beta-D-glucoceramide, Cer-Glu, glucosyl ceramide                                         | C24H46NO7FULLRCO   | 0      | Cytosol               |
| gluside_hs   | glucocerebroside (homo sapiens)                                 | 1-beta-D-glucoceramide, Cer-Glu, glucosyl ceramide                                         | C24H46NO7FULLRCO   | 0      | Golgi Apparatus       |
| gluside_hs   | glucocerebroside (homo sapiens)                                 | 1-beta-D-glucoceramide, Cer-Glu, glucosyl ceramide                                         | C24H46NO7FULLRCO   | 0      | Lysosome              |
| gluside_hs   | glucocerebroside (homo sapiens)                                 | 1-beta-D-glucoceramide, Cer-Glu, glucosyl ceramide                                         | C24H46NO7FULLRCO   | 0      | Endoplasmic Reticulum |
| glutcoa      | Glutaryl-CoA                                                    |                                                                                            | C26H37N7O19P3S     | -5     | Mitochondria          |
| glx          | Glyoxylate                                                      | Acetic acid, Glyoxalate, Glyoxylic acid                                                    | C2H1O3             | -1     | Cytosol               |
| glx          | Glyoxylate                                                      | Acetic acid, Glyoxalate, Glyoxylic acid                                                    | C2H1O3             | -1     | Mitochondria          |
| glx          | Glyoxylate                                                      | Acetic acid, Glyoxalate, Glyoxylic acid                                                    | C2H1O3             | -1     | Peroxisome            |
| gly          | Glycine                                                         | Aminoacetic acid, Gly                                                                      | C2H5NO2            | 0      | Cytosol               |
| gly          | Glycine                                                         | Aminoacetic acid, Gly                                                                      | C2H5NO2            | 0      | Extracellular         |
| gly          | Glycine                                                         | Aminoacetic acid, Gly                                                                      | C2H5NO2            | 0      | Lysosome              |
| gly          | Glycine                                                         | Aminoacetic acid, Gly                                                                      | C2H5NO2            | 0      | Mitochondria          |
| gly          | Glycine                                                         | Aminoacetic acid, Gly                                                                      | C2H5NO2            | 0      | Peroxisome            |
| glyald       | D-Glyceraldehyde                                                | (R)-glyceraldehyde                                                                         | C3H6O3             | 0      | Cytosol               |
| glyb         | Glycine betaine                                                 | Betaine, Trimethylaminoacetate                                                             | C5H11NO2           | 0      | Cytosol               |
| glyb         | Glycine betaine                                                 | Betaine, Trimethylaminoacetate                                                             | C5H11NO2           | 0      | Extracellular         |
| glyb         | Glycine betaine                                                 | Betaine, Trimethylaminoacetate                                                             | C5H11NO2           | 0      | Mitochondria          |
| glyc         | Glycerol                                                        | 1,2,3-trihydroxypropane, 3-propanetriol, Glycerin                                          | C3H8O3             | 0      | Cytosol               |
| glyc         | Glycerol                                                        | 1,2,3-trihydroxypropane, 3-propanetriol, Glycerin                                          | C3H8O3             | 0      | Extracellular         |
| glyc         | Glycerol                                                        | 1,2,3-trihydroxypropane, 3-propanetriol, Glycerin                                          | C3H8O3             | 0      | Mitochondria          |
| glyc3p       | Glycerol 3-phosphate                                            | Glycerophosphoric acid, Phosphatidyl glycerol, sn-Glycerol 3-phosphate, sn-Gro-1-P         | C3H7O6P            | -2     | Cytosol               |
| glyc3p       | Glycerol 3-phosphate                                            | Glycerophosphoric acid, Phosphatidyl glycerol, sn-Glycerol 3-phosphate, sn-Gro-1-P         | C3H7O6P            | -2     | Mitochondria          |
| glyclt       | Glycolate                                                       | Glycolic acid, Hydroxyacetic acid                                                          | C2H3O3             | -1     | Cytosol               |
| glyclt       | Glycolate                                                       | Glycolic acid, Hydroxyacetic acid                                                          | C2H3O3             | -1     | Mitochondria          |
| glyclt       | Glycolate                                                       | Glycolic acid, Hydroxyacetic acid                                                          | C2H3O3             | -1     | Peroxisome            |
| glyc-R       | (R)-Glycerate                                                   | D-Glycerate, Glycerate, Glyceric acid                                                      | C3H5O4             | -1     | Cytosol               |
| glyc-S       | (S)-Glycerate                                                   | L-glycerate                                                                                | C3H5O4             | -1     | Cytosol               |
| glyc-S       | (S)-Glycerate                                                   | L-glycerate                                                                                | C3H5O4             | -1     | Extracellular         |
| glygn1       | glycogen, structure 1 (glycogenin-1[1,4-Glc])                   |                                                                                            | C66H111O56X        | 0      | Cytosol               |
| glygn2       | glycogen, structure 2 (glycogenin-1,6-[7[1,4-Glc], 4[1,4-Glc]]) |                                                                                            | C66H111O56X        | 0      | Cytosol               |
| glygn2       | glycogen, structure 2 (glycogenin-1,6-[7[1,4-Glc], 4[1,4-Glc]]) |                                                                                            | C66H111O56X        | 0      | Extracellular         |
| glygn3       | glycogen, structure 3 (glycogenin-7[1,4-Glc])                   |                                                                                            | C42H71O36X         | 0      | Cytosol               |
| glygn4       | glycogen, structure 4 (glycogenin-1,6-[2[1,4-Glc], 1[4-Glc]])   |                                                                                            | C18H31O16X         | 0      | Extracellular         |
| glygn5       | glycogen, structure 5 (glycogenin-2[1,4-Glc])                   |                                                                                            | C12H21O11X         | 0      | Extracellular         |
| gm1_hs       | ganglioside GM1 (homo sapiens)                                  | Cer-Glc-Gal-NeuAc-GlaNAc-Gal                                                               | C55H95N3O30FULLRCO | -1     | Golgi Apparatus       |
| gm1a_hs      | GM1alpha (homo sapiens)                                         | III6NeuAc-Gg4Cer                                                                           | C55H95N3O30FULLRCO | -1     | Golgi Apparatus       |
| gm1b_hs      | GM1b (homo sapiens)                                             | (Gal)2 (GalNAc)1 (Glc)1 (Neu5Ac)1 (Cer)1                                                   | C55H95N3O30FULLRCO | -1     | Golgi Apparatus       |
| gm2_hs       | ganglioside GM2 (homo sapiens)                                  | Cer-Glc-Gal-NeuAc-GalNAc                                                                   | C49H85N3O25FULLRCO | -1     | Golgi Apparatus       |
| gm2a_hs      | GM2alpha (homo sapiens)                                         | (Gal)1 (GalNAc)1 (Glc)1 (Neu5Ac)1 (Cer)1                                                   | C49H85N3O25FULLRCO | -1     | Golgi Apparatus       |
| gm3_hs       | ganglioside GM3 (homo sapiens)                                  | Cer-Glc-Gal-NeuAc                                                                          | C41H72N2O20FULLRCO | -1     | Golgi Apparatus       |
| gmp          | GMP                                                             | Guanosine 5'-monophosphate, Guanosine 5'-phosphate, Guanosine monophosphate, Guanylic acid | C10H12N5O8P        | -2     | Cytosol               |
| gmp          | GMP                                                             | Guanosine 5'-monophosphate, Guanosine 5'-phosphate, Guanosine monophosphate, Guanylic acid | C10H12N5O8P        | -2     | Extracellular         |
| gmp          | GMP                                                             | Guanosine 5'-monophosphate, Guanosine 5'-phosphate, Guanosine monophosphate, Guanylic acid | C10H12N5O8P        | -2     | Golgi Apparatus       |
| gmp          | GMP                                                             | Guanosine 5'-monophosphate, Guanosine 5'-phosphate, Guanosine monophosphate, Guanylic acid | C10H12N5O8P        | -2     | Lysosome              |

| Abbreviation | Metabolite Name                                                                                                                  | Synonyms                                                                                                                    | Formula                           | Charge | Compartment           |
|--------------|----------------------------------------------------------------------------------------------------------------------------------|-----------------------------------------------------------------------------------------------------------------------------|-----------------------------------|--------|-----------------------|
| gmp          | GMP                                                                                                                              | Guanosine 5'-monophosphate, Guanosine 5'-phosphate, Guanosine monophosphate, Guanylic acid                                  | C10H12N5O8P                       | -2     | Mitochondria          |
| gmp          | GMP                                                                                                                              | Guanosine 5'-monophosphate, Guanosine 5'-phosphate, Guanosine monophosphate, Guanylic acid                                  | C10H12N5O8P                       | -2     | Nucleus               |
| gncore1      | GlcNAc-alpha-1,4-Core 1                                                                                                          |                                                                                                                             | C22H37N2O15X                      | 0      | Golgi Apparatus       |
| gncore2      | GlcNAc-alpha-1,4-Core 2                                                                                                          |                                                                                                                             | C30H50N3O20X                      | 0      | Golgi Apparatus       |
| gp1c_hs      | GP1c (homo sapiens)                                                                                                              | (Gal)2 (GalNAc)1 (Glc)1 (Neu5Ac)5 (Cer)1                                                                                    | C99H159N7O62FULLRCO               | -5     | Cytosol               |
| gp1c_hs      | GP1c (homo sapiens)                                                                                                              | (Gal)2 (GalNAc)1 (Glc)1 (Neu5Ac)5 (Cer)1                                                                                    | C99H159N7O62FULLRCO               | -5     | Extracellular         |
| gp1c_hs      | GP1c (homo sapiens)                                                                                                              | (Gal)2 (GalNAc)1 (Glc)1 (Neu5Ac)5 (Cer)1                                                                                    | C99H159N7O62FULLRCO               | -5     | Golgi Apparatus       |
| gp1calpha_hs | GP1c alpha (homo sapiens)                                                                                                        | (Gal)2 (GalNAc)1 (Glc)1 (Neu5Ac)5 (Cer)1                                                                                    | C99H159N7O62FULLRCO               | -5     | Cytosol               |
| gp1calpha_hs | GP1c alpha (homo sapiens)                                                                                                        | (Gal)2 (GalNAc)1 (Glc)1 (Neu5Ac)5 (Cer)1                                                                                    | C99H159N7O62FULLRCO               | -5     | Extracellular         |
| gp1calpha_hs | GP1c alpha (homo sapiens)                                                                                                        | (Gal)2 (GalNAc)1 (Glc)1 (Neu5Ac)5 (Cer)1                                                                                    | C99H159N7O62FULLRCO               | -5     | Golgi Apparatus       |
| gpail_hs     | D-glucosaminylphosphatidylinositol                                                                                               |                                                                                                                             | C15H28NO13PFULLR2CO2FULLR2CO2     | 0      | Cytosol               |
| gpi_hs       | glycophosphatidylinositol (GPI) anchor precursor (3-(phosphoethanolaminylo-mannosyl)-glucosaminyl-acylphosphatidylinositol) (H8) | {[PE-Man-].[PE-Man].[PE]}-Man-GlcN-acylPI                                                                                   | C55H106N4O38P4FULLR2CO2FULLR2CO2  | 0      | Endoplasmic Reticulum |
| gpi_prot_hs  | glycophosphatidylinositol (GPI)-anchored protein                                                                                 | {[(Prot-PE-Man),(PE-Man).[PE]]}-Man-GlcN-acylPI                                                                             | C55H106N4O38P4FULLR2CO2FULLR2CO2X | 0      | Endoplasmic Reticulum |
| gpi_sig      | glycophosphatidylinositol (GPI) signal sequence (C-terminal peptide)                                                             |                                                                                                                             | Y                                 | 0      | Endoplasmic Reticulum |
| gq1b_hs      | GQ1b (homo sapiens)                                                                                                              | (Gal)2 (GalNAc)1 (Glc)1 (Neu5Ac)4 (Cer)1                                                                                    | C88H143N6O54FULLRCO               | -4     | Cytosol               |
| gq1b_hs      | GQ1b (homo sapiens)                                                                                                              | (Gal)2 (GalNAc)1 (Glc)1 (Neu5Ac)4 (Cer)1                                                                                    | C88H143N6O54FULLRCO               | -4     | Extracellular         |
| gq1b_hs      | GQ1b (homo sapiens)                                                                                                              | (Gal)2 (GalNAc)1 (Glc)1 (Neu5Ac)4 (Cer)1                                                                                    | C88H143N6O54FULLRCO               | -4     | Golgi Apparatus       |
| gq1balpha_hs | GQ1balpha (homo sapiens)                                                                                                         | (Gal)2 (GalNAc)1 (Glc)1 (Neu5Ac)4 (Cer)1                                                                                    | C88H143N6O54FULLRCO               | -4     | Cytosol               |
| gq1balpha_hs | GQ1balpha (homo sapiens)                                                                                                         | (Gal)2 (GalNAc)1 (Glc)1 (Neu5Ac)4 (Cer)1                                                                                    | C88H143N6O54FULLRCO               | -4     | Extracellular         |
| gq1balpha_hs | GQ1balpha (homo sapiens)                                                                                                         | (Gal)2 (GalNAc)1 (Glc)1 (Neu5Ac)4 (Cer)1                                                                                    | C88H143N6O54FULLRCO               | -4     | Golgi Apparatus       |
| gq1c_hs      | GQ1c (homo sapiens)                                                                                                              | (Gal)2 (GalNAc)1 (Glc)1 (Neu5Ac)4 (Cer)1                                                                                    | C88H143N6O54FULLRCO               | -4     | Golgi Apparatus       |
| grdp         | Geranyl diphosphate                                                                                                              | GPP                                                                                                                         | C10H17O7P2                        | -3     | Cytosol               |
| grdp         | Geranyl diphosphate                                                                                                              | GPP                                                                                                                         | C10H17O7P2                        | -3     | Peroxisome            |
| gsn          | Guanosine                                                                                                                        | Guanine riboside, rG                                                                                                        | C10H13N5O5                        | 0      | Cytosol               |
| gsn          | Guanosine                                                                                                                        | Guanine riboside, rG                                                                                                        | C10H13N5O5                        | 0      | Extracellular         |
| gsn          | Guanosine                                                                                                                        | Guanine riboside, rG                                                                                                        | C10H13N5O5                        | 0      | Lysosome              |
| gsn          | Guanosine                                                                                                                        | Guanine riboside, rG                                                                                                        | C10H13N5O5                        | 0      | Mitochondria          |
| gt1a_hs      | GT1a (homo sapiens)                                                                                                              | (Gal)2 (GalNAc)1 (Glc)1 (Neu5Ac)3 (Cer)1                                                                                    | C77H127N5O46FULLRCO               | -3     | Cytosol               |
| gt1a_hs      | GT1a (homo sapiens)                                                                                                              | (Gal)2 (GalNAc)1 (Glc)1 (Neu5Ac)3 (Cer)1                                                                                    | C77H127N5O46FULLRCO               | -3     | Extracellular         |
| gt1a_hs      | GT1a (homo sapiens)                                                                                                              | (Gal)2 (GalNAc)1 (Glc)1 (Neu5Ac)3 (Cer)1                                                                                    | C77H127N5O46FULLRCO               | -3     | Golgi Apparatus       |
| gt1alpha_hs  | GT1alpha (homo sapiens)                                                                                                          | (Gal)2 (GalNAc)1 (Glc)1 (Neu5Ac)3 (Cer)1                                                                                    | C77H127N5O46FULLRCO               | -3     | Golgi Apparatus       |
| gt1b_hs      | GT1b (homo sapiens)                                                                                                              | (Gal)2 (GalNAc)1 (Glc)1 (Neu5Ac)3 (Cer)1                                                                                    | C77H127N5O46FULLRCO               | -3     | Golgi Apparatus       |
| gt1c_hs      | GT1c (homo sapiens)                                                                                                              | (Gal)2 (GalNAc)1 (Glc)1 (Neu5Ac)3 (Cer)1                                                                                    | C77H127N5O46FULLRCO               | -3     | Golgi Apparatus       |
| gt2_hs       | GT2 (homo sapiens)                                                                                                               | (Gal)1 (GalNAc)1 (Glc)1 (Neu5Ac)3 (Cer)1                                                                                    | C71H117N5O41FULLRCO               | -3     | Golgi Apparatus       |
| gt3_hs       | GT3 (homo sapiens)                                                                                                               | (Gal)1 (Glc)1 (Neu5Ac)3 (Cer)1                                                                                              | C63H104N4O36FULLRCO               | -3     | Cytosol               |
| gt3_hs       | GT3 (homo sapiens)                                                                                                               | (Gal)1 (Glc)1 (Neu5Ac)3 (Cer)1                                                                                              | C63H104N4O36FULLRCO               | -3     | Golgi Apparatus       |
| gthox        | Oxidized glutathione                                                                                                             | Glutathione disulfide, L-Glutathione oxidized                                                                               | C20H30N6O12S2                     | -2     | Cytosol               |
| gthox        | Oxidized glutathione                                                                                                             | Glutathione disulfide, L-Glutathione oxidized                                                                               | C20H30N6O12S2                     | -2     | Extracellular         |
| gthox        | Oxidized glutathione                                                                                                             | Glutathione disulfide, L-Glutathione oxidized                                                                               | C20H30N6O12S2                     | -2     | Mitochondria          |
| gthrd        | Reduced glutathione                                                                                                              | 5-L-Glutamyl-L-cysteinylglycine, Glutathione, N-(gamma-L-Glutamyl-L-cysteinyl)glycine, gamma-L-Glutamyl-L-cysteinyl-glycine | C10H16N3O6S                       | -1     | Cytosol               |
| gthrd        | Reduced glutathione                                                                                                              | 5-L-Glutamyl-L-cysteinylglycine, Glutathione, N-(gamma-L-Glutamyl-L-cysteinyl)glycine, gamma-L-Glutamyl-L-cysteinyl-glycine | C10H16N3O6S                       | -1     | Extracellular         |
| gthrd        | Reduced glutathione                                                                                                              | 5-L-Glutamyl-L-cysteinylglycine, Glutathione, N-(gamma-L-Glutamyl-L-cysteinyl)glycine, gamma-L-Glutamyl-L-cysteinyl-glycine | C10H16N3O6S                       | -1     | Mitochondria          |
| gthrd        | Reduced glutathione                                                                                                              | 5-L-Glutamyl-L-cysteinylglycine, Glutathione, N-(gamma-L-Glutamyl-L-cysteinyl)glycine, gamma-L-Glutamyl-L-cysteinyl-glycine | C10H16N3O6S                       | -1     | Endoplasmic Reticulum |
| gtp          | GTP                                                                                                                              | Guanosine 5'-triphosphate                                                                                                   | C10H12N5O14P3                     | -4     | Cytosol               |
| gtp          | GTP                                                                                                                              | Guanosine 5'-triphosphate                                                                                                   | C10H12N5O14P3                     | -4     | Extracellular         |
| gtp          | GTP                                                                                                                              | Guanosine 5'-triphosphate                                                                                                   | C10H12N5O14P3                     | -4     | Mitochondria          |
| gtp          | GTP                                                                                                                              | Guanosine 5'-triphosphate                                                                                                   | C10H12N5O14P3                     | -4     | Nucleus               |
| gua          | Guanine                                                                                                                          | 2-Amino-6-hydroxypurine, 2-Aminohypoxanthine, G                                                                             | C5H5N5O                           | 0      | Cytosol               |

| Abbreviation | Metabolite Name                                      | Synonyms                                                                                           | Formula        | Charge | Compartment           |
|--------------|------------------------------------------------------|----------------------------------------------------------------------------------------------------|----------------|--------|-----------------------|
| gua          | Guanine                                              | 2-Amino-6-hydroxypurine, 2-Aminohypoxanthine, G                                                    | C5H5N5O        | 0      | Extracellular         |
| gudac        | Guanidinoacetate                                     | Glycocyamine, Guanidinoacetic acid, Guanidoacetate, N-Amidinoglycine                               | C3H7N3O2       | 0      | Cytosol               |
| gullac       | L-Gulono-1,4-lactone                                 | L-Gulonic acid gamma-lactone, L-Gulono-gamma-lactone, L-Gulonolactone, gamma-Gulonolactone         | C6H10O6        | 0      | Cytosol               |
| gullac       | L-Gulono-1,4-lactone                                 | L-Gulonic acid gamma-lactone, L-Gulono-gamma-lactone, L-Gulonolactone, gamma-Gulonolactone         | C6H10O6        | 0      | Endoplasmic Reticulum |
| guln         | L-Gulonate                                           | Gulonate, Gulonic acid, L-Gulonic acid                                                             | C6H11O7        | -1     | Cytosol               |
| guln         | L-Gulonate                                           | Gulonate, Gulonic acid, L-Gulonic acid                                                             | C6H11O7        | -1     | Endoplasmic Reticulum |
| h            | H+                                                   | Hydrogen Ion, Proton                                                                               | H              | 1      | Cytosol               |
| h            | H+                                                   | Hydrogen Ion, Proton                                                                               | H              | 1      | Extracellular         |
| h            | H+                                                   | Hydrogen Ion, Proton                                                                               | H              | 1      | Golgi Apparatus       |
| h            | H+                                                   | Hydrogen Ion, Proton                                                                               | H              | 1      | Lysosome              |
| h            | H+                                                   | Hydrogen Ion, Proton                                                                               | H              | 1      | Mitochondria          |
| h            | H+                                                   | Hydrogen Ion, Proton                                                                               | H              | 1      | Nucleus               |
| h            | H+                                                   | Hydrogen Ion, Proton                                                                               | H              | 1      | Endoplasmic Reticulum |
| h            | H+                                                   | Hydrogen Ion, Proton                                                                               | H              | 1      | Peroxisome            |
| h2co3        | carbonic acid                                        |                                                                                                    | H2CO3          | 0      | Cytosol               |
| h2co3        | carbonic acid                                        |                                                                                                    | H2CO3          | 0      | Mitochondria          |
| h2o          | H2O                                                  | Dihydrogen oxide, Water                                                                            | H2O            | 0      | Cytosol               |
| h2o          | H2O                                                  | Dihydrogen oxide, Water                                                                            | H2O            | 0      | Extracellular         |
| h2o          | H2O                                                  | Dihydrogen oxide, Water                                                                            | H2O            | 0      | Golgi Apparatus       |
| h2o          | H2O                                                  | Dihydrogen oxide, Water                                                                            | H2O            | 0      | Lysosome              |
| h2o          | H2O                                                  | Dihydrogen oxide, Water                                                                            | H2O            | 0      | Mitochondria          |
| h2o          | H2O                                                  | Dihydrogen oxide, Water                                                                            | H2O            | 0      | Nucleus               |
| h2o          | H2O                                                  | Dihydrogen oxide, Water                                                                            | H2O            | 0      | Endoplasmic Reticulum |
| h2o          | H2O                                                  | Dihydrogen oxide, Water                                                                            | H2O            | 0      | Peroxisome            |
| h2o2         | Hydrogen peroxide                                    | H2O2, hydrogen dioxide, peroxide                                                                   | H2O2           | 0      | Cytosol               |
| h2o2         | Hydrogen peroxide                                    | H2O2, hydrogen dioxide, peroxide                                                                   | H2O2           | 0      | Extracellular         |
| h2o2         | Hydrogen peroxide                                    | H2O2, hydrogen dioxide, peroxide                                                                   | H2O2           | 0      | Lysosome              |
| h2o2         | Hydrogen peroxide                                    | H2O2, hydrogen dioxide, peroxide                                                                   | H2O2           | 0      | Mitochondria          |
| h2o2         | Hydrogen peroxide                                    | H2O2, hydrogen dioxide, peroxide                                                                   | H2O2           | 0      | Nucleus               |
| h2o2         | Hydrogen peroxide                                    | H2O2, hydrogen dioxide, peroxide                                                                   | H2O2           | 0      | Peroxisome            |
| ha           | hyaluronan                                           | Hyaluronate, Hyaluronic acid                                                                       | C28H40N2O22    | -2     | Extracellular         |
| ha           | hyaluronan                                           | Hyaluronate, Hyaluronic acid                                                                       | C28H40N2O22    | -2     | Lysosome              |
| ha_deg1      | hyaluronan degradation product 1                     |                                                                                                    | C22H33N2O16    | -1     | Lysosome              |
| ha_pre1      | hyaluronan biosynthesis, precursor 1                 |                                                                                                    | C14H20N011     | -1     | Extracellular         |
| ha_pre1      | hyaluronan biosynthesis, precursor 1                 |                                                                                                    | C14H20N011     | -1     | Lysosome              |
| hco3         | Bicarbonate                                          | Acid carbonate, HCO3-, Hydrogencarbonate                                                           | CHO3           | -1     | Cytosol               |
| hco3         | Bicarbonate                                          | Acid carbonate, HCO3-, Hydrogencarbonate                                                           | CHO3           | -1     | Extracellular         |
| hco3         | Bicarbonate                                          | Acid carbonate, HCO3-, Hydrogencarbonate                                                           | CHO3           | -1     | Mitochondria          |
| hcoumarin    | hydroxy coumarin                                     | 7 hydroxy coumarin                                                                                 | C9H6O3         | 0      | Cytosol               |
| hcoumarin    | hydroxy coumarin                                     | 7 hydroxy coumarin                                                                                 | C9H6O3         | 0      | Extracellular         |
| hcys-L       | L-Homocysteine                                       | L-2-Amino-4-mercaptobutyric acid, L-Homocysteine                                                   | C4H9NO2S       | 0      | Cytosol               |
| hdca         | Hexadecanoate (n-C16:0)                              | Cetylic acid, Hexadecanoic acid, Hexadecylic acid, Palmitic acid, palmitate                        | C16H31O2       | -1     | Cytosol               |
| hdca         | Hexadecanoate (n-C16:0)                              | Cetylic acid, Hexadecanoic acid, Hexadecylic acid, Palmitic acid, palmitate                        | C16H31O2       | -1     | Extracellular         |
| hdca         | Hexadecanoate (n-C16:0)                              | Cetylic acid, Hexadecanoic acid, Hexadecylic acid, Palmitic acid, palmitate                        | C16H31O2       | -1     | Endoplasmic Reticulum |
| hdca         | Hexadecanoate (n-C16:0)                              | Cetylic acid, Hexadecanoic acid, Hexadecylic acid, Palmitic acid, palmitate                        | C16H31O2       | -1     | Peroxisome            |
| hdcea        | Hexadecenoate (n-C16:1)                              | (9Z)-Hexadecenoic acid, Palmitoleic acid, cis-9-Hexadecenoic acid, hexadecenoic acid               | C16H29O2       | -1     | Cytosol               |
| hdcea        | Hexadecenoate (n-C16:1)                              | (9Z)-Hexadecenoic acid, Palmitoleic acid, cis-9-Hexadecenoic acid, hexadecenoic acid               | C16H29O2       | -1     | Extracellular         |
| hdcecm       | Hexadecenyl carnitine                                |                                                                                                    | C23H43NO4      | 0      | Cytosol               |
| hdcecm       | Hexadecenyl carnitine                                |                                                                                                    | C23H43NO4      | 0      | Mitochondria          |
| hdcoa        | Hexadecenoyl-CoA (n-C16:1CoA)                        | (2E)-Hexadecenoyl-CoA, palmitoleic coenzyme A, trans-2-Hexadecenoyl-CoA, trans-Hexadec-2-enoyl-CoA | C37H60N7O17P3S | -4     | Cytosol               |
| hdcoa        | Hexadecenoyl-CoA (n-C16:1CoA)                        | (2E)-Hexadecenoyl-CoA, palmitoleic coenzyme A, trans-2-Hexadecenoyl-CoA, trans-Hexadec-2-enoyl-CoA | C37H60N7O17P3S | -4     | Mitochondria          |
| hdd2coa      | trans-Hexadec-2-enoyl-CoA                            |                                                                                                    | C37H60N7O17P3S | -4     | Cytosol               |
| hdd2coa      | trans-Hexadec-2-enoyl-CoA                            |                                                                                                    | C37H60N7O17P3S | -4     | Mitochondria          |
| hdd2coa      | trans-Hexadec-2-enoyl-CoA                            |                                                                                                    | C37H60N7O17P3S | -4     | Peroxisome            |
| hdd2cm       | trans-Hexadec-2-enoyl carnitine                      |                                                                                                    | C23H43NO4      | 0      | Cytosol               |
| hdd2cm       | trans-Hexadec-2-enoyl carnitine                      |                                                                                                    | C23H43NO4      | 0      | Mitochondria          |
| hdeACP       | cis-hexadec-9-enoyl-[acyl-carrier protein] (n-C16:1) | Hexadecenoyl-ACP (n-C16:1ACP), cis-palmitol-9-oyl-[acyl-carrier protein] (n-C16:1)                 | C27H49N2O8PRS  | -1     | Cytosol               |
| hestratriol  | 4,17 dihydroxy estradiol                             | 4 hydroxy 17 beta estradiol                                                                        | C18H24O3       | 0      | Cytosol               |
| hestratriol  | 4,17 dihydroxy estradiol                             | 4 hydroxy 17 beta estradiol                                                                        | C18H24O3       | 0      | Extracellular         |
| hestratriol  | 4,17 dihydroxy estradiol                             | 4 hydroxy 17 beta estradiol                                                                        | C18H24O3       | 0      | Endoplasmic Reticulum |
| hexc         | hexacosanoate (n-C26:0)                              | cerotic acid, hexacosanoic acid                                                                    | C26H51O2       | -1     | Cytosol               |
| hexc         | hexacosanoate (n-C26:0)                              | cerotic acid, hexacosanoic acid                                                                    | C26H51O2       | -1     | Extracellular         |
| hexccoa      | Hexacosanoyl-CoA (n-C26:0CoA)                        | cerotic acid coenzyme a, cerotyl-CoA                                                               | C47H82N7O17P3S | -4     | Cytosol               |
| hexccoa      | Hexacosanoyl-CoA (n-C26:0CoA)                        | cerotic acid coenzyme a, cerotyl-CoA                                                               | C47H82N7O17P3S | -4     | Mitochondria          |
| hexccoa      | Hexacosanoyl-CoA (n-C26:0CoA)                        | cerotic acid coenzyme a, cerotyl-CoA                                                               | C47H82N7O17P3S | -4     | Peroxisome            |



| Abbreviation | Metabolite Name                         | Synonyms                                                                                                       | Formula          | Charge | Compartment           |
|--------------|-----------------------------------------|----------------------------------------------------------------------------------------------------------------|------------------|--------|-----------------------|
| hexccm       | hexacosanoyl carnitine                  |                                                                                                                | C33H65NO4        | 0      | Cytosol               |
| hexccm       | hexacosanoyl carnitine                  |                                                                                                                | C33H65NO4        | 0      | Mitochondria          |
| hgntis       | Homogentisate                           | 2,5-Dihydroxyphenylacetate, 2,5-Dihydroxyphenylacetic acid, Homogentisic acid                                  | C8H7O4           | -1     | Cytosol               |
| his-L        | L-Histidine                             | (S)-alpha-Amino-1H-imidazole-4-propionic acid, Glyoxaline-5-alanine, His                                       | C6H9N3O2         | 0      | Cytosol               |
| his-L        | L-Histidine                             | (S)-alpha-Amino-1H-imidazole-4-propionic acid, Glyoxaline-5-alanine, His                                       | C6H9N3O2         | 0      | Extracellular         |
| hista        | Histamine                               |                                                                                                                | C5H10N3          | 1      | Cytosol               |
| hista        | Histamine                               |                                                                                                                | C5H10N3          | 1      | Extracellular         |
| hLkynr       | 3-Hydroxy-L-kyurenine                   |                                                                                                                | C10H12N2O4       | 0      | Cytosol               |
| hmbil        | Hydroxymethylbilane                     |                                                                                                                | C40H38N4O17      | -8     | Cytosol               |
| hmgcoa       | Hydroxymethylglutaryl-CoA               | (S)-3-Hydroxy-3-methylglutaryl-CoA, 3-Hydroxy-3-methylglutaryl-CoA, HMG-CoA, Hydroxymethylglutaroyl coenzyme A | C27H39N7O20P3S   | -5     | Cytosol               |
| hmgcoa       | Hydroxymethylglutaryl-CoA               | (S)-3-Hydroxy-3-methylglutaryl-CoA, 3-Hydroxy-3-methylglutaryl-CoA, HMG-CoA, Hydroxymethylglutaroyl coenzyme A | C27H39N7O20P3S   | -5     | Mitochondria          |
| hmgcoa       | Hydroxymethylglutaryl-CoA               | (S)-3-Hydroxy-3-methylglutaryl-CoA, 3-Hydroxy-3-methylglutaryl-CoA, HMG-CoA, Hydroxymethylglutaroyl coenzyme A | C27H39N7O20P3S   | -5     | Endoplasmic Reticulum |
| hmgcoa       | Hydroxymethylglutaryl-CoA               | (S)-3-Hydroxy-3-methylglutaryl-CoA, 3-Hydroxy-3-methylglutaryl-CoA, HMG-CoA, Hydroxymethylglutaroyl coenzyme A | C27H39N7O20P3S   | -5     | Peroxisome            |
| hnifedipine  | hydroxy nifedipine                      |                                                                                                                | C17H18N2O7       | 0      | Cytosol               |
| hom-L        | L-Homoserine                            | 2-Amino-4-hydroxybutyric acid                                                                                  | C4H9NO3          | 0      | Cytosol               |
| hom-L        | L-Homoserine                            | 2-Amino-4-hydroxybutyric acid                                                                                  | C4H9NO3          | 0      | Extracellular         |
| homoval      | Homovanillic acid                       |                                                                                                                | C9H9O4           | -1     | Cytosol               |
| hpdca        | heptadecanoate                          | Heptadecanoic acid, Margeric acid, n-Heptadecanoic Acid,                                                       | C17H33O2         | -1     | Cytosol               |
| hpdca        | heptadecanoate                          | Heptadecanoic acid, Margeric acid, n-Heptadecanoic Acid,                                                       | C17H33O2         | -1     | Extracellular         |
| hpdcacoa     | heptadecanoyl coa                       | Heptadecanoic acid coa, Margeric acid coa, n-Heptadecanoic Acid coenzyme a                                     | C38H64N7O17P3S   | -4     | Cytosol               |
| hpdcacoa     | heptadecanoyl coa                       | Heptadecanoic acid coa, Margeric acid coa, n-Heptadecanoic Acid coenzyme a                                     | C38H64N7O17P3S   | -4     | Mitochondria          |
| hpdcaern     | heptadecanoyl carnitine                 | heptadecanoate carnitine, heptadecanoyl acid carnitine                                                         | C24H47NO4        | 0      | Cytosol               |
| hpdcaern     | heptadecanoyl carnitine                 | heptadecanoate carnitine, heptadecanoyl acid carnitine                                                         | C24H47NO4        | 0      | Mitochondria          |
| hpyr         | Hydroxypyruvate                         | 3-Hydroxypyruvate, 3-Hydroxypyruvic acid, Hydroxypyruvic acid                                                  | C3H3O4           | -1     | Cytosol               |
| hpyr         | Hydroxypyruvate                         | 3-Hydroxypyruvate, 3-Hydroxypyruvic acid, Hydroxypyruvic acid                                                  | C3H3O4           | -1     | Mitochondria          |
| hpyr         | Hydroxypyruvate                         | 3-Hydroxypyruvate, 3-Hydroxypyruvic acid, Hydroxypyruvic acid                                                  | C3H3O4           | -1     | Peroxisome            |
| hretn        | 4 hydroxy retinoic acid                 |                                                                                                                | C20H27O3         | -1     | Cytosol               |
| hretn        | 4 hydroxy retinoic acid                 |                                                                                                                | C20H27O3         | -1     | Nucleus               |
| hs           | heparan sulfate, free chain             |                                                                                                                | C79H114N5O102S12 | -13    | Lysosome              |
| hs_deg1      | heparan sulfate, degradation product 1  |                                                                                                                | C79H115N5O99S11  | -12    | Lysosome              |
| hs_deg10     | heparan sulfate, degradation product 10 |                                                                                                                | C55H80N3O70S8    | -9     | Lysosome              |
| hs_deg11     | heparan sulfate, degradation product 11 |                                                                                                                | C55H81N3O67S7    | -8     | Lysosome              |
| hs_deg12     | heparan sulfate, degradation product 12 |                                                                                                                | C55H82N3O64S6    | -7     | Lysosome              |
| hs_deg13     | heparan sulfate, degradation product 13 |                                                                                                                | C55H83N3O61S5    | -6     | Lysosome              |
| hs_deg14     | heparan sulfate, degradation product 14 |                                                                                                                | C57H84N3O62S5    | -7     | Lysosome              |
| hs_deg15     | heparan sulfate, degradation product 15 |                                                                                                                | C49H71N2O57S5    | -7     | Lysosome              |
| hs_deg16     | heparan sulfate, degradation product 16 |                                                                                                                | C49H72N2O54S4    | -6     | Lysosome              |
| hs_deg17     | heparan sulfate, degradation product 17 |                                                                                                                | C43H65N2O48S4    | -5     | Lysosome              |
| hs_deg18     | heparan sulfate, degradation product 18 |                                                                                                                | C43H66N2O45S3    | -4     | Lysosome              |
| hs_deg19     | heparan sulfate, degradation product 19 |                                                                                                                | C43H67N2O42S2    | -3     | Lysosome              |
| hs_deg2      | heparan sulfate, degradation product 2  |                                                                                                                | C79H116N5O96S10  | -11    | Lysosome              |
| hs_deg20     | heparan sulfate, degradation product 20 |                                                                                                                | C45H68N2O43S2    | -4     | Lysosome              |
| hs_deg21     | heparan sulfate, degradation product 21 |                                                                                                                | C37H55N3O38S2    | -4     | Lysosome              |
| hs_deg22     | heparan sulfate, degradation product 22 |                                                                                                                | C37H56N3O35S     | -3     | Lysosome              |
| hs_deg23     | heparan sulfate, degradation product 23 |                                                                                                                | C31H49N2O29S     | -2     | Lysosome              |
| hs_deg24     | heparan sulfate, degradation product 24 |                                                                                                                | C31H50N2O26      | -1     | Lysosome              |
| hs_deg25     | heparan sulfate, degradation product 25 |                                                                                                                | C23H37O21        | -1     | Lysosome              |
| hs_deg3      | heparan sulfate, degradation product 3  |                                                                                                                | C81H117N5O97S10  | -12    | Lysosome              |
| hs_deg4      | heparan sulfate, degradation product 4  |                                                                                                                | C73H104N4O92S10  | -12    | Lysosome              |
| hs_deg5      | heparan sulfate, degradation product 5  |                                                                                                                | C67H97N4O86S10   | -11    | Lysosome              |
| hs_deg6      | heparan sulfate, degradation product 6  |                                                                                                                | C67H98N4O83S9    | -10    | Lysosome              |
| hs_deg7      | heparan sulfate, degradation product 7  |                                                                                                                | C67H99N4O80S8    | -9     | Lysosome              |
| hs_deg8      | heparan sulfate, degradation product 8  |                                                                                                                | C69H100N4O81S8   | -10    | Lysosome              |
| hs_deg9      | heparan sulfate, degradation product 9  |                                                                                                                | C61H87N3O76S8    | -10    | Lysosome              |
| hs_pre1      | heparan sulfate, precursor 1            | GlcNAc-GlcA-Gal-Gal-Xyl-L-Ser (protein)                                                                        | C31H49NO25X      | -1     | Golgi Apparatus       |
| hs_pre10     | heparan sulfate, precursor 10           | (GlcN2S-GlcA)4-GlcNAc-GlcA-Gal-Gal-Xyl-L-Ser (protein)                                                         | C79H121N5O77S4X  | -5     | Golgi Apparatus       |
| hs_pre11     | heparan sulfate, precursor 11           | (GlcN2S-IdoA-GlcN2S-GlcA)2-GlcNAc-GlcA-Gal-Gal-Xyl-L-Ser (protein)                                             | C79H121N5O77S4X  | -5     | Golgi Apparatus       |
| hs_pre12     | heparan sulfate, precursor 12           | GlcN2S-IdoA-GlcN2S-GlcA2S-GlcN2S-IdoA2S-GlcN2S-GlcA-GlcNAc-GlcA-Gal-Gal-Xyl-L-Ser (protein)                    | C79H119N5O83S6X  | -7     | Golgi Apparatus       |

| Abbreviation | Metabolite Name               | Synonyms                                                                                                                                                                              | Formula           | Charge | Compartment           |
|--------------|-------------------------------|---------------------------------------------------------------------------------------------------------------------------------------------------------------------------------------|-------------------|--------|-----------------------|
| hs_pre13     | heparan sulfate, precursor 13 | GlcN2S-IdoA-GlcN2,6diS-GlcA2S-GlcN2,6diS-IdoA2S-GlcN2,6diS-GlcA-GlcNac-GlcA-Gal-Gal-Xyl-L-Ser (protein)                                                                               | C79H116N5O92S9X   | -10    | Golgi Apparatus       |
| hs_pre14     | heparan sulfate, precursor 14 |                                                                                                                                                                                       | C79H115N5O95S10X  | -11    | Golgi Apparatus       |
| hs_pre15     | heparan sulfate, precursor 15 |                                                                                                                                                                                       | C79H114N5O98S11X  | -12    | Golgi Apparatus       |
| hs_pre2      | heparan sulfate, precursor 2  | GlcA-GlcNac-GlcA-Gal-Gal-Xyl-L-Ser (protein)                                                                                                                                          | C37H56N031X       | -2     | Golgi Apparatus       |
| hs_pre3      | heparan sulfate, precursor 3  | GlcNac-GlcA-GlcNac-GlcA-Gal-Gal-Xyl-L-Ser (protein)                                                                                                                                   | C45H69N2036X      | -2     | Golgi Apparatus       |
| hs_pre4      | heparan sulfate, precursor 4  | GlcA-GlcNac-GlcA-GlcNac-GlcA-Gal-Gal-Xyl-L-Ser (protein)                                                                                                                              | C51H76N2042X      | -3     | Golgi Apparatus       |
| hs_pre5      | heparan sulfate, precursor 5  | (GlcNac-GlcA)2-GlcNac-GlcA-Gal-Gal-Xyl-L-Ser (protein)                                                                                                                                | C59H89N3047X      | -3     | Golgi Apparatus       |
| hs_pre6      | heparan sulfate, precursor 6  | GlcA-(GlcNac-GlcA)2-GlcNac-GlcA-Gal-Gal-Xyl-L-Ser (protein)                                                                                                                           | C65H96N3053X      | -4     | Golgi Apparatus       |
| hs_pre7      | heparan sulfate, precursor 7  | (GlcNac-GlcA)3-GlcNac-GlcA-Gal-Gal-Xyl-L-Ser (protein)                                                                                                                                | C73H109N4058X     | -4     | Golgi Apparatus       |
| hs_pre8      | heparan sulfate, precursor 8  | GlcA-(GlcNac-GlcA)3-GlcNac-GlcA-Gal-Gal-Xyl-L-Ser (protein)                                                                                                                           | C79H116N4064X     | -5     | Golgi Apparatus       |
| hs_pre9      | heparan sulfate, precursor 9  | (GlcNac-GlcA)4-GlcNac-GlcA-Gal-Gal-Xyl-L-Ser (protein)                                                                                                                                | C87H129N5069X     | -5     | Golgi Apparatus       |
| hspg         | heparan sulfate proteoglycan  | GlcN2S-IdoA-GlcN2,6diS-GlcA2S-GlcN2,3,6triS-IdoA2S-GlcN2,6diS-GlcA-GlcNac-GlcA-Gal-Gal-Xyl-L-Ser (protein), Heparan sulfate, Heparin monosulfate, Heparin sulfate, Heparitin sulfate; | C79H113N5O101S12X | -13    | Extracellular         |
| hspg         | heparan sulfate proteoglycan  | GlcN2S-IdoA-GlcN2,6diS-GlcA2S-GlcN2,3,6triS-IdoA2S-GlcN2,6diS-GlcA-GlcNac-GlcA-Gal-Gal-Xyl-L-Ser (protein), Heparan sulfate, Heparin monosulfate, Heparin sulfate, Heparitin sulfate; | C79H113N5O101S12X | -13    | Golgi Apparatus       |
| hspg         | heparan sulfate proteoglycan  | GlcN2S-IdoA-GlcN2,6diS-GlcA2S-GlcN2,3,6triS-IdoA2S-GlcN2,6diS-GlcA-GlcNac-GlcA-Gal-Gal-Xyl-L-Ser (protein), Heparan sulfate, Heparin monosulfate, Heparin sulfate, Heparitin sulfate; | C79H113N5O101S12X | -13    | Lysosome              |
| htaxol       | hydroxylated taxol            | 6 alpha hydroxy paclitaxel, 6 alpha hydroxy taxol                                                                                                                                     | C47H31NO15        | 0      | Cytosol               |
| htaxol       | hydroxylated taxol            | 6 alpha hydroxy paclitaxel, 6 alpha hydroxy taxol                                                                                                                                     | C47H31NO15        | 0      | Extracellular         |
| hxan         | Hypoxanthine                  | 1,7-Dihydro-6H-purin-6-one, 6-Hydroxypurine, Purine-6-ol                                                                                                                              | C5H4N4O           | 0      | Cytosol               |
| hxan         | Hypoxanthine                  | 1,7-Dihydro-6H-purin-6-one, 6-Hydroxypurine, Purine-6-ol                                                                                                                              | C5H4N4O           | 0      | Extracellular         |
| hxan         | Hypoxanthine                  | 1,7-Dihydro-6H-purin-6-one, 6-Hydroxypurine, Purine-6-ol                                                                                                                              | C5H4N4O           | 0      | Lysosome              |
| hxan         | Hypoxanthine                  | 1,7-Dihydro-6H-purin-6-one, 6-Hydroxypurine, Purine-6-ol                                                                                                                              | C5H4N4O           | 0      | Peroxisome            |
| hxdcal       | Hexadecanal                   | 16-Hexadecanal, Palmitaldehyde                                                                                                                                                        | C16H32O           | 0      | Endoplasmic Reticulum |
| hypaur       | Hypotaurine                   | 2-Aminoethanesulfonic acid                                                                                                                                                            | C2H6NO2S          | -1     | Cytosol               |
| i            | Iodide                        | I-                                                                                                                                                                                    | I                 | -1     | Cytosol               |
| i            | Iodide                        | I-                                                                                                                                                                                    | I                 | -1     | Extracellular         |
| ibcoa        | Isobutyryl-CoA                | 2-Methylpropanoyl-CoA, 2-Methylpropionyl-CoA                                                                                                                                          | C25H38N7O17P3S    | -4     | Mitochondria          |
| icit         | Isocitrate                    | 1-Hydroxypropane-1, 1-Hydroxytricarballic acid, 2, 3-tricarboxylic acid, Isocitric acid                                                                                               | C6H5O7            | -3     | Cytosol               |
| icit         | Isocitrate                    | 1-Hydroxypropane-1, 1-Hydroxytricarballic acid, 2, 3-tricarboxylic acid, Isocitric acid                                                                                               | C6H5O7            | -3     | Mitochondria          |
| icit         | Isocitrate                    | 1-Hydroxypropane-1, 1-Hydroxytricarballic acid, 2, 3-tricarboxylic acid, Isocitric acid                                                                                               | C6H5O7            | -3     | Peroxisome            |
| id3acald     | Indole-3-acetaldehyde         | 2-(Indol-3-yl)acetaldehyde, Indoleacetaldehyde                                                                                                                                        | C10H9NO           | 0      | Cytosol               |
| id3acald     | Indole-3-acetaldehyde         | 2-(Indol-3-yl)acetaldehyde, Indoleacetaldehyde                                                                                                                                        | C10H9NO           | 0      | Mitochondria          |
| idour        | L-Iduronate                   | D-Ido-hexuronic acid, IdoA, L-Iduronic acid                                                                                                                                           | C6H9O7            | -1     | Cytosol               |
| idour        | L-Iduronate                   | D-Ido-hexuronic acid, IdoA, L-Iduronic acid                                                                                                                                           | C6H9O7            | -1     | Lysosome              |
| idp          | IDP                           | 5'-inosinate diphosphate, Inosine 5'-diphosphate, Inosine diphosphate                                                                                                                 | C10H11N4O11P2     | -3     | Cytosol               |
| idp          | IDP                           | 5'-inosinate diphosphate, Inosine 5'-diphosphate, Inosine diphosphate                                                                                                                 | C10H11N4O11P2     | -3     | Extracellular         |
| idp          | IDP                           | 5'-inosinate diphosphate, Inosine 5'-diphosphate, Inosine diphosphate                                                                                                                 | C10H11N4O11P2     | -3     | Mitochondria          |
| idp          | IDP                           | 5'-inosinate diphosphate, Inosine 5'-diphosphate, Inosine diphosphate                                                                                                                 | C10H11N4O11P2     | -3     | Nucleus               |
| ile-L        | L-Isoleucine                  | 2-Amino-3-methylvaleric acid, Ile                                                                                                                                                     | C6H13NO2          | 0      | Cytosol               |
| ile-L        | L-Isoleucine                  | 2-Amino-3-methylvaleric acid, Ile                                                                                                                                                     | C6H13NO2          | 0      | Extracellular         |
| ile-L        | L-Isoleucine                  | 2-Amino-3-methylvaleric acid, Ile                                                                                                                                                     | C6H13NO2          | 0      | Mitochondria          |
| im4ac        | Imidazole-4-acetate           | 4-Imidazoleacetate, Imidazoleacetic acid                                                                                                                                              | C5H5N2O2          | -1     | Cytosol               |
| im4ac        | Imidazole-4-acetate           | 4-Imidazoleacetate, Imidazoleacetic acid                                                                                                                                              | C5H5N2O2          | -1     | Mitochondria          |
| im4act       | Imidazole-4-acetaldehyde      | Imidazole acetaldehyde                                                                                                                                                                | C5H6N2O           | 0      | Cytosol               |
| im4act       | Imidazole-4-acetaldehyde      | Imidazole acetaldehyde                                                                                                                                                                | C5H6N2O           | 0      | Mitochondria          |
| imp          | IMP                           | 5'-Inosinate, 5'-Inosine monophosphate, 5'-Inosinic acid, Inosine 5'-monophosphate, Inosine 5'-phosphate, Inosine monophosphate, Inosinic acid                                        | C10H11N4O8P       | -2     | Cytosol               |

| Abbreviation | Metabolite Name                                        | Synonyms                                                                                                                                       | Formula             | Charge | Compartment     |
|--------------|--------------------------------------------------------|------------------------------------------------------------------------------------------------------------------------------------------------|---------------------|--------|-----------------|
| imp          | IMP                                                    | 5'-Inosinate, 5'-Inosine monophosphate, 5'-Inosinic acid, Inosine 5'-monophosphate, Inosine 5'-phosphate, Inosine monophosphate, Inosinic acid | C10H11N4O8P         | -2     | Extracellular   |
| imp          | IMP                                                    | 5'-Inosinate, 5'-Inosine monophosphate, 5'-Inosinic acid, Inosine 5'-monophosphate, Inosine 5'-phosphate, Inosine monophosphate, Inosinic acid | C10H11N4O8P         | -2     | Mitochondria    |
| ind3ac       | Indole-3-acetate                                       | 3-indoleacetate, Indole-3-acetic acid, Indoleacetate, Indoleacetic acid                                                                        | C10H8NO2            | -1     | Cytosol         |
| ind3ac       | Indole-3-acetate                                       | 3-indoleacetate, Indole-3-acetic acid, Indoleacetate, Indoleacetic acid                                                                        | C10H8NO2            | -1     | Mitochondria    |
| inost        | myo-Inositol                                           | 1D-myo-Inositol, 1L-myo-Inositol, Bios I, Cyclohexitol, D-myo-Inositol, Dambosose, Inositol, myo-Inositol, Meat sugar, meso-Inositol           | C6H12O6             | 0      | Cytosol         |
| inost        | myo-Inositol                                           | 1D-myo-Inositol, 1L-myo-Inositol, Bios I, Cyclohexitol, D-myo-Inositol, Dambosose, Inositol, myo-Inositol, Meat sugar, meso-Inositol           | C6H12O6             | 0      | Extracellular   |
| ins          | Inosine                                                | Hypoxanthine ribonucleoside                                                                                                                    | C10H12N4O5          | 0      | Cytosol         |
| ins          | Inosine                                                | Hypoxanthine ribonucleoside                                                                                                                    | C10H12N4O5          | 0      | Extracellular   |
| ins          | Inosine                                                | Hypoxanthine ribonucleoside                                                                                                                    | C10H12N4O5          | 0      | Lysosome        |
| ins          | Inosine                                                | Hypoxanthine ribonucleoside                                                                                                                    | C10H12N4O5          | 0      | Mitochondria    |
| iodine       | Iodine                                                 | I2                                                                                                                                             | I2                  | 0      | Cytosol         |
| ipdp         | Isopentenyl diphosphate                                | Isopentenyl pyrophosphate, Isoprenyl pyrophosphate, delta3-Isopentenyl diphosphate, delta3-methyl-3-butenyl diphosphate                        | C5H9O7P2            | -3     | Cytosol         |
| ipdp         | Isopentenyl diphosphate                                | Isopentenyl pyrophosphate, Isoprenyl pyrophosphate, delta3-Isopentenyl diphosphate, delta3-methyl-3-butenyl diphosphate                        | C5H9O7P2            | -3     | Peroxisome      |
| itaccoa      | Itaconyl-CoA                                           |                                                                                                                                                | C26H35N7O19P3S      | -5     | Mitochondria    |
| itacon       | Itaconate                                              | Itaconic acid, Methylene succinic acid                                                                                                         | C5H4O4              | -2     | Mitochondria    |
| itp          | ITP                                                    | Inosine 5'-triphosphate, Inosine triphosphate, Inosine triphosphosphate                                                                        | C10H11N4O14P3       | -4     | Cytosol         |
| itp          | ITP                                                    | Inosine 5'-triphosphate, Inosine triphosphate, Inosine triphosphosphate                                                                        | C10H11N4O14P3       | -4     | Mitochondria    |
| itp          | ITP                                                    | Inosine 5'-triphosphate, Inosine triphosphate, Inosine triphosphosphate                                                                        | C10H11N4O14P3       | -4     | Nucleus         |
| ivcoa        | Isovaleryl-CoA                                         | 3-Methylbutanoyl-CoA                                                                                                                           | C26H40N7O17P3S      | -4     | Mitochondria    |
| k            | potassium                                              | K+, Potassium                                                                                                                                  | K                   | 1      | Cytosol         |
| k            | potassium                                              | K+, Potassium                                                                                                                                  | K                   | 1      | Extracellular   |
| k            | potassium                                              | K+, Potassium                                                                                                                                  | K                   | 1      | Golgi Apparatus |
| kdn          | 2-keto-3-deoxy-D-glycero-D-galactonic acid             | 3-deoxy-D-glycero-D-galacto-nonulsonic acid, a-D-KDN, deaminouramic acid                                                                       | C9H15O9             | -1     | Cytosol         |
| kdn          | 2-keto-3-deoxy-D-glycero-D-galactonic acid 9-phosphate |                                                                                                                                                | C9H14O12P           | -3     | Cytosol         |
| ksi          | keratan sulfate 1                                      |                                                                                                                                                | C247H393N17O213S12X | -13    | Extracellular   |
| ksi          | keratan sulfate 1                                      |                                                                                                                                                | C247H393N17O213S12X | -13    | Golgi Apparatus |
| ksi          | keratan sulfate 1                                      |                                                                                                                                                | C247H393N17O213S12X | -13    | Lysosome        |
| ksi_deg1     | keratan sulfate 1, degradation product 1               |                                                                                                                                                | C241H383N17O209S12X | -13    | Extracellular   |
| ksi_deg1     | keratan sulfate 1, degradation product 1               |                                                                                                                                                | C241H383N17O209S12X | -13    | Lysosome        |
| ksi_deg10    | keratan sulfate 1, degradation product 10              |                                                                                                                                                | C188H302N13O163S9   | -9     | Lysosome        |
| ksi_deg11    | keratan sulfate 1, degradation product 11              |                                                                                                                                                | C180H289N12O158S9   | 9      | Lysosome        |
| ksi_deg12    | keratan sulfate 1, degradation product 12              |                                                                                                                                                | C174H279N12O153S9   | -9     | Lysosome        |
| ksi_deg13    | keratan sulfate 1, degradation product 13              |                                                                                                                                                | C174H280N12O150S8   | -8     | Lysosome        |
| ksi_deg14    | keratan sulfate 1, degradation product 14              |                                                                                                                                                | C166H267N11O145S8   | -8     | Lysosome        |
| ksi_deg15    | keratan sulfate 1, degradation product 15              |                                                                                                                                                | C160H257N11O140S8   | -8     | Lysosome        |
| ksi_deg16    | keratan sulfate 1, degradation product 16              |                                                                                                                                                | C160H258N11O137S7   | -7     | Lysosome        |
| ksi_deg17    | keratan sulfate 1, degradation product 17              |                                                                                                                                                | C152H245N10O132S7   | -7     | Lysosome        |
| ksi_deg18    | keratan sulfate 1, degradation product 18              |                                                                                                                                                | C146H235N10O127S7   | -7     | Lysosome        |
| ksi_deg19    | keratan sulfate 1, degradation product 19              |                                                                                                                                                | C146H236N10O124S6   | -6     | Lysosome        |
| ksi_deg2     | keratan sulfate 1, degradation product 2               |                                                                                                                                                | C241H384N17O210S12  | -13    | Lysosome        |
| ksi_deg20    | keratan sulfate 1, degradation product 20              |                                                                                                                                                | C138H223N9O119S6    | -6     | Lysosome        |
| ksi_deg21    | keratan sulfate 1, degradation product 21              |                                                                                                                                                | C132H213N9O114S6    | -6     | Lysosome        |
| ksi_deg22    | keratan sulfate 1, degradation product 22              |                                                                                                                                                | C132H214N9O111S5    | -5     | Lysosome        |
| ksi_deg23    | keratan sulfate 1, degradation product 23              |                                                                                                                                                | C124H201N8O106S5    | -5     | Lysosome        |
| ksi_deg24    | keratan sulfate 1, degradation product 24              |                                                                                                                                                | C118H191N8O101S5    | -5     | Lysosome        |
| ksi_deg25    | keratan sulfate 1, degradation product 25              |                                                                                                                                                | C118H192N8O98S4     | -4     | Lysosome        |
| ksi_deg26    | keratan sulfate 1, degradation product 26              |                                                                                                                                                | C110H179N7O93S4     | -4     | Lysosome        |
| ksi_deg27    | keratan sulfate 1, degradation product 27              |                                                                                                                                                | C104H169N7O88S4     | -4     | Lysosome        |
| ksi_deg28    | keratan sulfate 1, degradation product 28              |                                                                                                                                                | C104H170N7O85S3     | -3     | Lysosome        |
| ksi_deg29    | keratan sulfate 1, degradation product 29              |                                                                                                                                                | C96H157N6O80S3      | -3     | Lysosome        |
| ksi_deg3     | keratan sulfate 1, degradation product 3               |                                                                                                                                                | C233H371N16O205S12  | -13    | Lysosome        |
| ksi_deg30    | keratan sulfate 1, degradation product 30              |                                                                                                                                                | C90H147N6O75S3      | -3     | Lysosome        |
| ksi_deg31    | keratan sulfate 1, degradation product 31              |                                                                                                                                                | C90H148N6O72S2      | -2     | Lysosome        |
| ksi_deg32    | keratan sulfate 1, degradation product 32              |                                                                                                                                                | C82H135N5O67S2      | -2     | Lysosome        |
| ksi_deg33    | keratan sulfate 1, degradation product 33              |                                                                                                                                                | C76H125N5O62S2      | -2     | Lysosome        |
| ksi_deg34    | keratan sulfate 1, degradation product 34              |                                                                                                                                                | C76H126N5O59S1      | -1     | Lysosome        |
| ksi_deg35    | keratan sulfate 1, degradation product 35              |                                                                                                                                                | C68H113N4O54S1      | -1     | Lysosome        |
| ksi_deg36    | keratan sulfate 1, degradation product 36              |                                                                                                                                                | C62H103N4O49S1      | -1     | Lysosome        |
| ksi_deg37    | keratan sulfate 1, degradation product 37              |                                                                                                                                                | C62H104N4O46        | 0      | Lysosome        |
| ksi_deg38    | keratan sulfate 1, degradation product 38              |                                                                                                                                                | C54H91N3O41         | 0      | Lysosome        |
| ksi_deg39    | keratan sulfate 1, degradation product 39              |                                                                                                                                                | C48H81N3O36         | 0      | Lysosome        |
| ksi_deg4     | keratan sulfate 1, degradation product 4               |                                                                                                                                                | C222H355N15O197S12  | -12    | Lysosome        |
| ksi_deg40    | keratan sulfate 1, degradation product 40              |                                                                                                                                                | C40H68N2O31         | 0      | Lysosome        |
| ksi_deg41    | keratan sulfate 1, degradation product 41              |                                                                                                                                                | C34H58N2O26         | 0      | Lysosome        |

| Abbreviation     | Metabolite Name                                           | Synonyms | Formula             | Charge | Compartment     |
|------------------|-----------------------------------------------------------|----------|---------------------|--------|-----------------|
| kxi_deg5         | keratan sulfate I, degradation product 5                  |          | C22H356N15O194S11   | -11    | Lysosome        |
| kxi_deg6         | keratan sulfate I, degradation product 6                  |          | C210H336N15O184S11  | -11    | Lysosome        |
| kxi_deg7         | keratan sulfate I, degradation product 7                  |          | C210H337N15O181S10  | -10    | Lysosome        |
| kxi_deg8         | keratan sulfate I, degradation product 8                  |          | C194H311N13O171S10  | -10    | Lysosome        |
| kxi_deg9         | keratan sulfate I, degradation product 9                  |          | C188H301N13O166S10  | -10    | Lysosome        |
| kxi_pre1         | keratan sulfate I biosynthesis, precursor 1               |          | C79H129N5O57X       | -1     | Golgi Apparatus |
| kxi_pre10        | keratan sulfate I biosynthesis, precursor 10              |          | C129H209N9O98S2X    | -3     | Golgi Apparatus |
| kxi_pre11        | keratan sulfate I biosynthesis, precursor 11              |          | C129H208N9O101S3X   | -4     | Golgi Apparatus |
| kxi_pre12        | keratan sulfate I biosynthesis, precursor 12              |          | C135H218N9O106S3X   | -4     | Golgi Apparatus |
| kxi_pre13        | keratan sulfate I biosynthesis, precursor 13              |          | C143H231N10O111S3X  | -4     | Golgi Apparatus |
| kxi_pre14        | keratan sulfate I biosynthesis, precursor 14              |          | C143H230N10O114S4X  | -5     | Golgi Apparatus |
| kxi_pre15        | keratan sulfate I biosynthesis, precursor 15              |          | C149H240N10O119S4X  | -5     | Golgi Apparatus |
| kxi_pre16        | keratan sulfate I biosynthesis, precursor 16              |          | C157H253N11O124S4X  | -5     | Golgi Apparatus |
| kxi_pre17        | keratan sulfate I biosynthesis, precursor 17              |          | C157H252N11O127S5X  | -6     | Golgi Apparatus |
| kxi_pre18        | keratan sulfate I biosynthesis, precursor 18              |          | C163H262N11O132S5X  | -6     | Golgi Apparatus |
| kxi_pre19        | keratan sulfate I biosynthesis, precursor 19              |          | C171H275N12O137S5X  | -6     | Golgi Apparatus |
| kxi_pre2         | keratan sulfate I biosynthesis, precursor 2               |          | C87H142N6O62X       | -1     | Golgi Apparatus |
| kxi_pre20        | keratan sulfate I biosynthesis, precursor 20              |          | C171H274N12O140S6X  | -7     | Golgi Apparatus |
| kxi_pre21        | keratan sulfate I biosynthesis, precursor 21              |          | C177H284N12O145S6X  | -7     | Golgi Apparatus |
| kxi_pre22        | keratan sulfate I biosynthesis, precursor 22              |          | C185H297N13O150S6X  | -7     | Golgi Apparatus |
| kxi_pre23        | keratan sulfate I biosynthesis, precursor 23              |          | C185H296N13O153S7X  | -8     | Golgi Apparatus |
| kxi_pre24        | keratan sulfate I biosynthesis, precursor 24              |          | C191H306N13O158S7X  | -8     | Golgi Apparatus |
| kxi_pre25        | keratan sulfate I biosynthesis, precursor 25              |          | C199H319N14O163S7X  | -8     | Golgi Apparatus |
| kxi_pre26        | keratan sulfate I biosynthesis, precursor 26              |          | C199H318N14O166S8X  | -9     | Golgi Apparatus |
| kxi_pre27        | keratan sulfate I biosynthesis, precursor 27              |          | C205H328N14O171S8X  | -9     | Golgi Apparatus |
| kxi_pre28        | keratan sulfate I biosynthesis, precursor 28              |          | C213H341N15O176S8X  | -9     | Golgi Apparatus |
| kxi_pre29        | keratan sulfate I biosynthesis, precursor 29              |          | C213H340N15O179S9X  | -10    | Golgi Apparatus |
| kxi_pre3         | keratan sulfate I biosynthesis, precursor 3               |          | C93H152N6O67X       | -1     | Golgi Apparatus |
| kxi_pre30        | keratan sulfate I biosynthesis, precursor 30              |          | C219H350N15O184S9X  | -10    | Golgi Apparatus |
| kxi_pre31        | keratan sulfate I biosynthesis, precursor 31              |          | C227H363N16O189S9X  | -10    | Golgi Apparatus |
| kxi_pre32        | keratan sulfate I biosynthesis, precursor 32              |          | C227H362N16O192S10X | -11    | Golgi Apparatus |
| kxi_pre33        | keratan sulfate I biosynthesis, precursor 33              |          | C233H372N16O197S10X | -11    | Golgi Apparatus |
| kxi_pre34        | keratan sulfate I biosynthesis, precursor 34              |          | C241H385N17O202S10X | -11    | Golgi Apparatus |
| kxi_pre35        | keratan sulfate I biosynthesis, precursor 35              |          | C241H384N17O205S11X | -12    | Golgi Apparatus |
| kxi_pre36        | keratan sulfate I biosynthesis, precursor 36              |          | C247H394N17O210S11X | -12    | Golgi Apparatus |
| kxi_pre4         | keratan sulfate I biosynthesis, precursor 4               |          | C101H165N7O72X      | -1     | Golgi Apparatus |
| kxi_pre5         | keratan sulfate I biosynthesis, precursor 5               |          | C101H164N7O75SX     | -2     | Golgi Apparatus |
| kxi_pre6         | keratan sulfate I biosynthesis, precursor 6               |          | C107H174N7O80SX     | -2     | Golgi Apparatus |
| kxi_pre7         | keratan sulfate I biosynthesis, precursor 7               |          | C115H187N8O85S2X    | -2     | Golgi Apparatus |
| kxi_pre8         | keratan sulfate I biosynthesis, precursor 8               |          | C115H186N8O88S2X    | -3     | Golgi Apparatus |
| kxi_pre9         | keratan sulfate I biosynthesis, precursor 9               |          | C121H196N8O93S2X    | -3     | Golgi Apparatus |
| kxii_core2       | keratan sulfate II (core 2-linked)                        |          | C81H129N6O67S3X     | -4     | Extracellular   |
| kxii_core2       | keratan sulfate II (core 2-linked)                        |          | C81H129N6O67S3X     | -4     | Golgi Apparatus |
| kxii_core2       | keratan sulfate II (core 2-linked)                        |          | C81H129N6O67S3X     | -4     | Lysosome        |
| kxii_core2_deg1  | keratan sulfate II (core 2-linked), degradation product 1 |          | C70H113N5O59S3X     | -3     | Lysosome        |
| kxii_core2_deg2  | keratan sulfate II (core 2-linked), degradation product 2 |          | C70H114N5O56S2X     | -2     | Lysosome        |
| kxii_core2_deg3  | keratan sulfate II (core 2-linked), degradation product 3 |          | C58H94N5O46S2X      | -2     | Lysosome        |
| kxii_core2_deg4  | keratan sulfate II (core 2-linked), degradation product 4 |          | C58H95N5O43SX       | -1     | Lysosome        |
| kxii_core2_deg5  | keratan sulfate II (core 2-linked), degradation product 5 |          | C50H82N4O38SX       | -1     | Lysosome        |
| kxii_core2_deg6  | keratan sulfate II (core 2-linked), degradation product 6 |          | C44H72N4O33SX       | -1     | Lysosome        |
| kxii_core2_deg7  | keratan sulfate II (core 2-linked), degradation product 7 |          | C44H73N4O30X        | 0      | Lysosome        |
| kxii_core2_deg8  | keratan sulfate II (core 2-linked), degradation product 8 |          | C36H60N3O25X        | 0      | Lysosome        |
| kxii_core2_deg9  | keratan sulfate II (core 2-linked), degradation product 9 |          | C30H50N3O20X        | 0      | Lysosome        |
| kxii_core2_pre1  | keratan sulfate II biosynthesis, precursor 1              |          | C33H53N3O23X        | -1     | Golgi Apparatus |
| kxii_core2_pre10 | keratan sulfate II biosynthesis, precursor 10             |          | C81H130N6O64S2X     | -3     | Golgi Apparatus |
| kxii_core2_pre2  | keratan sulfate II biosynthesis, precursor 2              |          | C39H63N3O28X        | -1     | Golgi Apparatus |
| kxii_core2_pre3  | keratan sulfate II biosynthesis, precursor 3              |          | C47H76N4O33X        | -1     | Golgi Apparatus |
| kxii_core2_pre4  | keratan sulfate II biosynthesis, precursor 4              |          | C53H86N4O38X        | -1     | Golgi Apparatus |
| kxii_core2_pre5  | keratan sulfate II biosynthesis, precursor 5              |          | C61H99N5O43X        | -1     | Golgi Apparatus |
| kxii_core2_pre6  | keratan sulfate II biosynthesis, precursor 6              |          | C61H98N5O46SX       | -2     | Golgi Apparatus |
| kxii_core2_pre7  | keratan sulfate II biosynthesis, precursor 7              |          | C67H108N5O51SX      | -2     | Golgi Apparatus |
| kxii_core2_pre8  | keratan sulfate II biosynthesis, precursor 8              |          | C75H121N6O56SX      | -2     | Golgi Apparatus |
| kxii_core2_pre9  | keratan sulfate II biosynthesis, precursor 9              |          | C75H120N6O59S2X     | -3     | Golgi Apparatus |
| kxii_core4       | keratan sulfate II (core 4-linked)                        |          | C89H142N7O72S3X     | -4     | Extracellular   |
| kxii_core4       | keratan sulfate II (core 4-linked)                        |          | C89H142N7O72S3X     | -4     | Golgi Apparatus |
| kxii_core4       | keratan sulfate II (core 4-linked)                        |          | C89H142N7O72S3X     | -4     | Lysosome        |
| kxii_core4_deg1  | keratan sulfate II (core 4-linked), degradation product 1 |          | C78H126N6O64S3X     | -3     | Lysosome        |
| kxii_core4_deg2  | keratan sulfate II (core 4-linked), degradation product 2 |          | C78H127N6O61S2X     | -2     | Lysosome        |
| kxii_core4_deg3  | keratan sulfate II (core 4-linked), degradation product 3 |          | C66H107N6O51S2X     | -2     | Lysosome        |
| kxii_core4_deg4  | keratan sulfate II (core 4-linked), degradation product 4 |          | C66H108N6O48SX      | -1     | Lysosome        |
| kxii_core4_pre1  | keratan sulfate II biosynthesis, precursor 1              |          | C36H60N3O25X        | 0      | Golgi Apparatus |
| kxii_core4_pre10 | keratan sulfate II biosynthesis, precursor 10             |          | C89H143N7O69S2X     | -3     | Golgi Apparatus |
| kxii_core4_pre2  | keratan sulfate II biosynthesis, precursor 2              |          | C47H76N4O33X        | -1     | Golgi Apparatus |
| kxii_core4_pre3  | keratan sulfate II biosynthesis, precursor 3              |          | C55H89N5O38X        | -1     | Golgi Apparatus |
| kxii_core4_pre4  | keratan sulfate II biosynthesis, precursor 4              |          | C61H99N5O43X        | -1     | Golgi Apparatus |

| Abbreviation    | Metabolite Name                                                                                                                                                                                           | Synonyms                                                                                                                                                 | Formula         | Charge | Compartment           |
|-----------------|-----------------------------------------------------------------------------------------------------------------------------------------------------------------------------------------------------------|----------------------------------------------------------------------------------------------------------------------------------------------------------|-----------------|--------|-----------------------|
| ksii_core4_pre5 | keratan sulfate II biosynthesis, precursor 5                                                                                                                                                              |                                                                                                                                                          | C69H112N6O48X   | -1     | Golgi Apparatus       |
| ksii_core4_pre6 | keratan sulfate II biosynthesis, precursor 6                                                                                                                                                              |                                                                                                                                                          | C69H111N6O51SX  | -2     | Golgi Apparatus       |
| ksii_core4_pre7 | keratan sulfate II biosynthesis, precursor 7                                                                                                                                                              |                                                                                                                                                          | C75H121N6O56SX  | -2     | Golgi Apparatus       |
| ksii_core4_pre8 | keratan sulfate II biosynthesis, precursor 8                                                                                                                                                              |                                                                                                                                                          | C83H134N7O61SX  | -2     | Golgi Apparatus       |
| ksii_core4_pre9 | keratan sulfate II biosynthesis, precursor 9                                                                                                                                                              |                                                                                                                                                          | C83H133N7O64S2X | -3     | Golgi Apparatus       |
| kynate          | 4-Hydroxy-2-quinolinecarboxylic acid                                                                                                                                                                      | 4-Hydroxy-2-quinolinecarboxylic acid, Kynurenate, Kynurenic acid                                                                                         | C10H6NO3        | -1     | Cytosol               |
| L2aadp          | L-2-Aminoadipate                                                                                                                                                                                          | L-2-Aminoadipic acid, L-alpha-Aminoadipate, L-alpha-Aminoadipic acid                                                                                     | C6H10NO4        | -1     | Cytosol               |
| L2aadp          | L-2-Aminoadipate                                                                                                                                                                                          | L-2-Aminoadipic acid, L-alpha-Aminoadipate, L-alpha-Aminoadipic acid                                                                                     | C6H10NO4        | -1     | Mitochondria          |
| L2aadp6sa       | L-2-Aminoadipate 6-semialdehyde                                                                                                                                                                           |                                                                                                                                                          | C6H11NO3        | 0      | Cytosol               |
| L2aadp6sa       | L-2-Aminoadipate 6-semialdehyde                                                                                                                                                                           |                                                                                                                                                          | C6H11NO3        | 0      | Mitochondria          |
| l2fn2m2masn     | [[galactosyl-(1,4)-N-Acetyl-glucosaminyl-(1,2)-mannosyl-(1,3)-]1-[N-acetyl-glucosaminyl-(1,2)-mannosyl-(1,6)-]mannosyl-(1,4)-N-acetyl-glucosaminyl-(1,4)-[fucosyl-(1,6)-N-acetyl-glucosaminyl] asparagine |                                                                                                                                                          | C68H113N4O49X   | 0      | Golgi Apparatus       |
| l2n2m2mn        | de-Fuc, reducing GlcNAc removed, de-Sia form of PA6 (w/peptide linkage)                                                                                                                                   |                                                                                                                                                          | C54H91N3O41     | 0      | Cytosol               |
| l2n2m2mn        | de-Fuc, reducing GlcNAc removed, de-Sia form of PA6 (w/peptide linkage)                                                                                                                                   |                                                                                                                                                          | C54H91N3O41     | 0      | Lysosome              |
| l2xser          | (Gal)2-Xyl-L-Ser (protein)                                                                                                                                                                                |                                                                                                                                                          | C17H29O14X      | 0      | Golgi Apparatus       |
| lac-D           | D-Lactate                                                                                                                                                                                                 | (R)-Lactate, D-2-Hydroxypropanoic acid, D-2-Hydroxypropionic acid, D-Lactic acid                                                                         | C3H5O3          | -1     | Cytosol               |
| lac-D           | D-Lactate                                                                                                                                                                                                 | (R)-Lactate, D-2-Hydroxypropanoic acid, D-2-Hydroxypropionic acid, D-Lactic acid                                                                         | C3H5O3          | -1     | Extracellular         |
| lac-D           | D-Lactate                                                                                                                                                                                                 | (R)-Lactate, D-2-Hydroxypropanoic acid, D-2-Hydroxypropionic acid, D-Lactic acid                                                                         | C3H5O3          | -1     | Mitochondria          |
| lac-L           | L-Lactate                                                                                                                                                                                                 | (S)-Lactate, Hydroxypropionic acid, L-Lactic acid                                                                                                        | C3H5O3          | -1     | Cytosol               |
| lac-L           | L-Lactate                                                                                                                                                                                                 | (S)-Lactate, Hydroxypropionic acid, L-Lactic acid                                                                                                        | C3H5O3          | -1     | Extracellular         |
| lac-L           | L-Lactate                                                                                                                                                                                                 | (S)-Lactate, Hydroxypropionic acid, L-Lactic acid                                                                                                        | C3H5O3          | -1     | Mitochondria          |
| lald-D          | D-Lactaldehyde                                                                                                                                                                                            | (R)-Lactaldehyde, D-2-Hydroxypropionaldehyde                                                                                                             | C3H6O2          | 0      | Cytosol               |
| lald-D          | D-Lactaldehyde                                                                                                                                                                                            | (R)-Lactaldehyde, D-2-Hydroxypropionaldehyde                                                                                                             | C3H6O2          | 0      | Mitochondria          |
| lald-L          | L-Lactaldehyde                                                                                                                                                                                            | (S)-Lactaldehyde, L-2-Hydroxypropionaldehyde                                                                                                             | C3H6O2          | 0      | Cytosol               |
| lald-L          | L-Lactaldehyde                                                                                                                                                                                            | (S)-Lactaldehyde, L-2-Hydroxypropionaldehyde                                                                                                             | C3H6O2          | 0      | Mitochondria          |
| lanost          | Lanosterol                                                                                                                                                                                                |                                                                                                                                                          | C30H50O         | 0      | Cytosol               |
| lanost          | Lanosterol                                                                                                                                                                                                |                                                                                                                                                          | C30H50O         | 0      | Endoplasmic Reticulum |
| lcts            | Lactose                                                                                                                                                                                                   | 1-beta-D-Galactopyranosyl-4-alpha-D-glucopyranose, Milk sugar, lactobiose                                                                                | C12H22O11       | 0      | Cytosol               |
| lcts            | Lactose                                                                                                                                                                                                   | 1-beta-D-Galactopyranosyl-4-alpha-D-glucopyranose, Milk sugar, lactobiose                                                                                | C12H22O11       | 0      | Extracellular         |
| lcts            | Lactose                                                                                                                                                                                                   | 1-beta-D-Galactopyranosyl-4-alpha-D-glucopyranose, Milk sugar, lactobiose                                                                                | C12H22O11       | 0      | Golgi Apparatus       |
| lcts            | Lactose                                                                                                                                                                                                   | 1-beta-D-Galactopyranosyl-4-alpha-D-glucopyranose, Milk sugar, lactobiose                                                                                | C12H22O11       | 0      | Lysosome              |
| Lcyst           | L-Cysteate                                                                                                                                                                                                | 2-Amino-3-sulfopropionic acid, 3-Sulfolanine, L-Cysteic acid                                                                                             | C3H6NO5S        | -1     | Cytosol               |
| Lcyst           | L-Cysteate                                                                                                                                                                                                | 2-Amino-3-sulfopropionic acid, 3-Sulfolanine, L-Cysteic acid                                                                                             | C3H6NO5S        | -1     | Mitochondria          |
| Lcystin         | L-Cystine                                                                                                                                                                                                 | L-Dicysteine, L-alpha-Diamino-beta-dithiolic acid                                                                                                        | C6H12N2O4S2     | 0      | Cytosol               |
| Lcystin         | L-Cystine                                                                                                                                                                                                 | L-Dicysteine, L-alpha-Diamino-beta-dithiolic acid                                                                                                        | C6H12N2O4S2     | 0      | Extracellular         |
| L-dpchrn        | L-Dopachrome                                                                                                                                                                                              | 2-L-Carboxy-2,3-dihydroindole-5,6-quinone                                                                                                                | C9H6NO4         | -1     | Cytosol               |
| leuktrA4        | Leukotriene A4                                                                                                                                                                                            | (7E,9E,11Z,14Z)-(5S,6S)-5,6-Epoxyeicosa-7,9,11,14-tetraenoate, (7E,9E,11Z,14Z)-(5S,6S)-5,6-Epoxyeicosa-7,9,11,14-tetr, LTA4, Leukotriene A4              | C20H29O3        | -1     | Cytosol               |
| leuktrA4        | Leukotriene A4                                                                                                                                                                                            | (7E,9E,11Z,14Z)-(5S,6S)-5,6-Epoxyeicosa-7,9,11,14-tetraenoate, (7E,9E,11Z,14Z)-(5S,6S)-5,6-Epoxyeicosa-7,9,11,14-tetr, LTA4, Leukotriene A4              | C20H29O3        | -1     | Endoplasmic Reticulum |
| leuktrB4        | Leukotriene B4                                                                                                                                                                                            | (6Z,8E,10E,14Z)-(5S,12R)-5,12-Dihydroxyeicosa-6,8,10,14-tetraenoate, (6Z,8E,10E,14Z)-(5S,12R)-5,12-Dihydroxyeicosa-6,8,10,14-tetraenoate, Leukotriene B4 | C20H31O4        | -1     | Cytosol               |
| leuktrB4        | Leukotriene B4                                                                                                                                                                                            | (6Z,8E,10E,14Z)-(5S,12R)-5,12-Dihydroxyeicosa-6,8,10,14-tetraenoate, (6Z,8E,10E,14Z)-(5S,12R)-5,12-Dihydroxyeicosa-6,8,10,14-tetraenoate, Leukotriene B4 | C20H31O4        | -1     | Endoplasmic Reticulum |
| leuktrB4wcooh   | w-carboxy leukotriene B4                                                                                                                                                                                  | 20 carboxy leukotriene B4, omega carboxy leukotriene B4, omega carboxylated leukotriene B4                                                               | C20H28O6        | -2     | Endoplasmic Reticulum |
| leuktrB4woh     | w-hydroxyl leukotriene B4                                                                                                                                                                                 | 20 hydroxy leukotriene B4, omega hydroxy leukotriene B4, omega-hydroxylated leukotriene B4                                                               | C20H31O5        | -1     | Endoplasmic Reticulum |
| leuktrC4        | Leukotriene C4                                                                                                                                                                                            |                                                                                                                                                          | C30H45N3O9S     | -2     | Cytosol               |
| leuktrC4        | Leukotriene C4                                                                                                                                                                                            |                                                                                                                                                          | C30H45N3O9S     | -2     | Extracellular         |

| Abbreviation | Metabolite Name                        | Synonyms                                                                                                                                                                      | Formula            | Charge | Compartment           |
|--------------|----------------------------------------|-------------------------------------------------------------------------------------------------------------------------------------------------------------------------------|--------------------|--------|-----------------------|
| leuktrC4     | Leukotriene C4                         |                                                                                                                                                                               | C30H45N3O9S        | -2     | Endoplasmic Reticulum |
| leuktrD4     | Leukotriene D4                         | LTD4, Leukotriene D4                                                                                                                                                          | C25H39N2O6S        | -1     | Cytosol               |
| leuktrD4     | Leukotriene D4                         | LTD4, Leukotriene D4                                                                                                                                                          | C25H39N2O6S        | -1     | Endoplasmic Reticulum |
| leuktrE4     | leukotriene E4                         | 5S-hydroxy,6R-(S-cysteinyl),7E,9E,11Z,14Z-<br>eicosatetraenoic acid, C05952, LMFA03020002,<br>LTE4, leukotriene E4                                                            | C23H36NO5S         | -1     | Cytosol               |
| leuktrF4     | leukotriene F4                         | C06462, LTF4, Leukotriene F4                                                                                                                                                  | C28H42N2O8S        | -2     | Cytosol               |
| leu-L        | L-Leucine                              | 2-amino-4-methylvaleric acid, Leu                                                                                                                                             | C6H13NO2           | 0      | Cytosol               |
| leu-L        | L-Leucine                              | 2-amino-4-methylvaleric acid, Leu                                                                                                                                             | C6H13NO2           | 0      | Extracellular         |
| leu-L        | L-Leucine                              | 2-amino-4-methylvaleric acid, Leu                                                                                                                                             | C6H13NO2           | 0      | Mitochondria          |
| Lfmkynr      | L-Formylkynurenine                     | N-Formyl-L-kynurenine                                                                                                                                                         | C11H12N2O4         | 0      | Cytosol               |
| lgnc         | lignoceric acid                        | Lignoceric acid, Tetracosanoic acid                                                                                                                                           | C24H47O2           | -1     | Cytosol               |
| lgnc         | lignoceric acid                        | Lignoceric acid, Tetracosanoic acid                                                                                                                                           | C24H47O2           | -1     | Extracellular         |
| lgnccoa      | lignoceryl coenzyme A                  |                                                                                                                                                                               | C45H78N7O17P3S     | -4     | Cytosol               |
| lgnccoa      | lignoceryl coenzyme A                  |                                                                                                                                                                               | C45H78N7O17P3S     | -4     | Mitochondria          |
| lgnccoa      | lignoceryl coenzyme A                  |                                                                                                                                                                               | C45H78N7O17P3S     | -4     | Peroxisome            |
| lgncrm       | lignoceryl carnitine                   |                                                                                                                                                                               | C31H61NO4          | 0      | Cytosol               |
| lgncrm       | lignoceryl carnitine                   |                                                                                                                                                                               | C31H61NO4          | 0      | Mitochondria          |
| lgt-S        | (R)-S-Lactoylglutathione               |                                                                                                                                                                               | C13H20N3O8S        | -1     | Cytosol               |
| lgt-S        | (R)-S-Lactoylglutathione               |                                                                                                                                                                               | C13H20N3O8S        | -1     | Mitochondria          |
| limnen       | Limonene                               | Limonene                                                                                                                                                                      | C10H16             | 0      | Cytosol               |
| limnen       | Limonene                               | Limonene                                                                                                                                                                      | C10H16             | 0      | Extracellular         |
| lipoate      | Lipoate                                | Lipoic acid, Thioctic acid, alpha-Lipoic acid                                                                                                                                 | C8H14O2S2          | 0      | Cytosol               |
| lipoate      | Lipoate                                | Lipoic acid, Thioctic acid, alpha-Lipoic acid                                                                                                                                 | C8H14O2S2          | 0      | Extracellular         |
| Lkynr        | L-Kynurenine                           | 3-Anthraniloyl-L-alanine                                                                                                                                                      | C10H12N2O3         | 0      | Cytosol               |
| lnelc        | linoalaidic acid (all trans C18:2)     | 9-cis,11-trans-Octadecadienoate, C18:2, Linoalaidic<br>acid                                                                                                                   | C18H31O2           | -1     | Cytosol               |
| lnelc        | linoalaidic acid (all trans C18:2)     | 9-cis,11-trans-Octadecadienoate, C18:2, Linoalaidic<br>acid                                                                                                                   | C18H31O2           | -1     | Extracellular         |
| lnelcACP     | linoalaidic acid ACP (all trans)       |                                                                                                                                                                               | C29H51N2O8PRS      | -1     | Cytosol               |
| lnelcco      | linoalaidyl coenzyme A                 |                                                                                                                                                                               | C39H62N7O17P3S     | -4     | Cytosol               |
| lnelcco      | linoalaidyl coenzyme A                 |                                                                                                                                                                               | C39H62N7O17P3S     | -4     | Mitochondria          |
| lnelccrm     | Linoalaidyl carnitine                  |                                                                                                                                                                               | C25H45NO4          | 0      | Cytosol               |
| lnelccrm     | Linoalaidyl carnitine                  |                                                                                                                                                                               | C25H45NO4          | 0      | Mitochondria          |
| lnlc         | linoleic acid (all cis C18:2) n-6      | 9,12-Octadecadienoic acid, 9-cis,12-cis-<br>Octadecadienoate, 9-cis,12-cis-Octadecadienoic<br>acid, Linoleate, Linoleic acid                                                  | C18H31O2           | -1     | Cytosol               |
| lnlc         | linoleic acid (all cis C18:2) n-6      | 9,12-Octadecadienoic acid, 9-cis,12-cis-<br>Octadecadienoate, 9-cis,12-cis-Octadecadienoic<br>acid, Linoleate, Linoleic acid                                                  | C18H31O2           | -1     | Extracellular         |
| lnlcACP      | linoleic acid ACP (all cis)            |                                                                                                                                                                               | C29H51N2O8PRS      | -1     | Cytosol               |
| lnlcco       | linoleic coenzyme A                    | linoleic acid coenzyme A, linoleic coenzyme A                                                                                                                                 | C39H62N7O17P3S     | -4     | Cytosol               |
| lnlcco       | linoleic coenzyme A                    | linoleic acid coenzyme A, linoleic coenzyme A                                                                                                                                 | C39H62N7O17P3S     | -4     | Mitochondria          |
| lnlccrm      | Linoleyl carnitine                     | linoleic acid carnitine                                                                                                                                                       | C25H45NO4          | 0      | Cytosol               |
| lnlccrm      | Linoleyl carnitine                     | linoleic acid carnitine                                                                                                                                                       | C25H45NO4          | 0      | Mitochondria          |
| lnlnca       | alpha-Linolenic acid, C18:3, n-3       | (9Z,12Z,15Z)-Octadecatrienoic acid, 9,12,15-<br>Octadecatrienoic acid, Linolenate, alpha-Linolenic<br>acid                                                                    | C18H29O2           | -1     | Cytosol               |
| lnlnca       | alpha-Linolenic acid, C18:3, n-3       | (9Z,12Z,15Z)-Octadecatrienoic acid, 9,12,15-<br>Octadecatrienoic acid, Linolenate, alpha-Linolenic<br>acid                                                                    | C18H29O2           | -1     | Extracellular         |
| lnlnccoa     | alpha-Linolenoyl-CoA                   | alpha-Linolenoyl-CoA                                                                                                                                                          | C39H60N7O17P3S     | -4     | Cytosol               |
| lnlnccoa     | alpha-Linolenoyl-CoA                   | alpha-Linolenoyl-CoA                                                                                                                                                          | C39H60N7O17P3S     | -4     | Mitochondria          |
| lnlnccrm     | alpha-linolenyl carnitine              |                                                                                                                                                                               | C25H43NO4          | 0      | Cytosol               |
| lnlnccrm     | alpha-linolenyl carnitine              |                                                                                                                                                                               | C25H43NO4          | 0      | Mitochondria          |
| lnlncg       | gamma-linolenic acid                   | 6,9,12-Octadecatrienoic acid, gamma-linolenic<br>acid                                                                                                                         | C18H29O2           | -1     | Cytosol               |
| lnlncg       | gamma-linolenic acid                   | 6,9,12-Octadecatrienoic acid, gamma-linolenic<br>acid                                                                                                                         | C18H29O2           | -1     | Extracellular         |
| lnlncco      | gamma-linolenoyl-CoA                   | gamma-Linolenoyl-CoA                                                                                                                                                          | C39H60N7O17P3S     | -4     | Cytosol               |
| lnlncco      | gamma-linolenoyl-CoA                   | gamma-Linolenoyl-CoA                                                                                                                                                          | C39H60N7O17P3S     | -4     | Mitochondria          |
| lnlncco      | gamma-linolenoyl-CoA                   | gamma-Linolenoyl-CoA                                                                                                                                                          | C39H60N7O17P3S     | -4     | Peroxisome            |
| lnlnccrm     | gamma-linolenyl carnitine              |                                                                                                                                                                               | C25H43NO4          | 0      | Cytosol               |
| lnlnccrm     | gamma-linolenyl carnitine              |                                                                                                                                                                               | C25H43NO4          | 0      | Mitochondria          |
| lpam         | Lipoamide                              | Thioctic Acid Amide                                                                                                                                                           | C8H15NO2S          | 0      | Mitochondria          |
| lpchol_hs    | lysophosphatidylcholine (homo sapiens) | 1-Acyl-sn-glycero-3-phosphocholine, 1-Acyl-sn-<br>glycerol-3-phosphocholine, 2-Lysolecithin, 2-<br>Lysophosphatidylcholine, alpha-<br>Acylglycerophosphocholine, lysolecithin | C8H19NO5PFULLR2CO2 | 0      | Cytosol               |
| lpchol_hs    | lysophosphatidylcholine (homo sapiens) | 1-Acyl-sn-glycero-3-phosphocholine, 1-Acyl-sn-<br>glycerol-3-phosphocholine, 2-Lysolecithin, 2-<br>Lysophosphatidylcholine, alpha-<br>Acylglycerophosphocholine, lysolecithin | C8H19NO5PFULLR2CO2 | 0      | Extracellular         |
| Lpipecol     | L-Pipecolate                           | 2-Piperidinecarboxylic acid, Pipecolic acid,<br>Pipicolinic acid                                                                                                              | C6H11NO2           | 0      | Peroxisome            |
| lpro         | Lipoylprotein                          |                                                                                                                                                                               | S2X                | 0      | Mitochondria          |
| lthstrl      | 5alpha-Cholest-7-en-3beta-ol           | 5alpha-Cholest-7-en-3beta-ol, Lathosterol                                                                                                                                     | C27H46O            | 0      | Endoplasmic Reticulum |
| lum3         | Lumisterol 3                           |                                                                                                                                                                               | C27H44O            | 0      | Cytosol               |
| lxsr         | Gal-Xyl-L-Ser (protein)                |                                                                                                                                                                               | C11H19O9X          | 0      | Golgi Apparatus       |

| Abbreviation          | Metabolite Name                                                                                 | Synonyms                                              | Formula                            | Charge | Compartment           |
|-----------------------|-------------------------------------------------------------------------------------------------|-------------------------------------------------------|------------------------------------|--------|-----------------------|
| lys-L                 | L-Lysine                                                                                        | 2,6-diaminohexanoic acid, Lys, Lysine acid            | C6H15N2O2                          | 1      | Cytosol               |
| lys-L                 | L-Lysine                                                                                        | 2,6-diaminohexanoic acid, Lys, Lysine acid            | C6H15N2O2                          | 1      | Extracellular         |
| lys-L                 | L-Lysine                                                                                        | 2,6-diaminohexanoic acid, Lys, Lysine acid            | C6H15N2O2                          | 1      | Mitochondria          |
| lys-L                 | L-Lysine                                                                                        | 2,6-diaminohexanoic acid, Lys, Lysine acid            | C6H15N2O2                          | 1      | Nucleus               |
| lys-L                 | L-Lysine                                                                                        | 2,6-diaminohexanoic acid, Lys, Lysine acid            | C6H15N2O2                          | 1      | Peroxisome            |
| lyxt                  | L-lyxonate                                                                                      | L-Lyxonic acid                                        | C5H9O6                             | -1     | Cytosol               |
| m(em)3gacpail_hs      | mannosyl-3-(phosphoethanolaminy)-glucosaminyl-acylphosphatidylinositol (M4A)                    | [[[Man-1],[PE-]Man-],(PE-]Man-1],[PE-]Man-GlcN-acylPI | C61H116N4O43P4FULLR2CO2F ULLR2CO2  | 0      | Endoplasmic Reticulum |
| m(em)3gacpail_prot_hs | mannosyl-3-(phosphoethanolaminy)-glucosaminyl-acylphosphatidylinositol-Protein (M4A)            |                                                       | C61H116N4O43P4FULLR2CO2F ULLR2CO2X | 0      | Endoplasmic Reticulum |
| m1mpdol_L             | alpha-D-mannosyl-beta-D-mannosyl-diacetylchitobiosyldiphosphodolichol, human liver homolog      |                                                       | C1360H2228N200270P20               | -20    | Cytosol               |
| m1mpdol_U             | alpha-D-mannosyl-beta-D-mannosyl-diacetylchitobiosyldiphosphodolichol, human uterine homolog    |                                                       | C1305H2140N200270P20               | -20    | Cytosol               |
| m2emgacpail_hs        | (dimannosyl1,(phosphoethanolaminy)-mannosyl-glucosaminyl-acylphosphatidylinositol (H6)          | [(Man)2-1],[PE-]Man-GlcN-acylPI                       | C51H94N2O32P2FULLR2CO2F ULLR2CO2   | 0      | Endoplasmic Reticulum |
| m2gacpail_hs          | dimannosyl-1-glucosaminyl-acylphosphatidylinositol (H3)                                         | (Man)2-GlcN-acylPI                                    | C43H78N2O44P4FULLR2CO2F ULLR2CO2   | 0      | Endoplasmic Reticulum |
| m2mn                  | (alpha-D-mannosyl)2-beta-D-mannosyl-N-acetylglucosamine                                         |                                                       | C26H45NO21                         | 0      | Cytosol               |
| m2mn                  | (alpha-D-mannosyl)2-beta-D-mannosyl-N-acetylglucosamine                                         |                                                       | C26H45NO21                         | 0      | Lysosome              |
| m2mpdol_L             | (alpha-D-mannosyl)2-beta-D-mannosyl-diacetylchitobiosyldiphosphodolichol, human liver homolog   |                                                       | C1420H2328N200320P20               | -20    | Cytosol               |
| m2mpdol_U             | (alpha-D-mannosyl)2-beta-D-mannosyl-diacetylchitobiosyldiphosphodolichol, human uterine homolog |                                                       | C1365H2240N200320P20               | -20    | Cytosol               |
| m3emgacpail_hs        | (trimannosyl1,(phosphoethanolaminy)-mannosyl-glucosaminyl-acylphosphatidylinositol (M4C)        | [(Man)3-1],[PE-]Man-GlcN-acylPI                       | C57H104N2O37P2FULLR2CO2F ULLR2CO2  | 0      | Endoplasmic Reticulum |
| m3gacpail_hs          | trimannosyl-1-glucosaminyl-acylphosphatidylinositol (H4)                                        | (Man)3-GlcN-acylPI                                    | C49H88N2O39P4FULLR2CO2F ULLR2CO2   | 0      | Endoplasmic Reticulum |
| m3mpdol_L             | (alpha-D-mannosyl)3-beta-D-mannosyl-diacetylchitobiosyldiphosphodolichol, human liver homolog   |                                                       | C1480H2428N200370P20               | -20    | Cytosol               |
| m3mpdol_U             | (alpha-D-mannosyl)3-beta-D-mannosyl-diacetylchitobiosyldiphosphodolichol, human uterine homolog |                                                       | C1425H2340N200370P20               | -20    | Cytosol               |
| m4masn                | (alpha-D-mannosyl)4-beta-D-mannosyl-diacetylchitobiosyl-asparagine (protein)                    |                                                       | C46H77N2O35X                       | 0      | Golgi Apparatus       |
| m4mpdol_L             | (alpha-D-Mannosyl)4-beta-D-mannosyl-diacetylchitobiosyldiphosphodolichol, human liver homolog   |                                                       | C1540H2528N200420P20               | -20    | Cytosol               |
| m4mpdol_L             | (alpha-D-Mannosyl)4-beta-D-mannosyl-diacetylchitobiosyldiphosphodolichol, human liver homolog   |                                                       | C1540H2528N200420P20               | -20    | Endoplasmic Reticulum |
| m4mpdol_U             | (alpha-D-Mannosyl)4-beta-D-mannosyl-diacetylchitobiosyldiphosphodolichol, human uterine homolog |                                                       | C1485H2440N200420P20               | -20    | Cytosol               |
| m4mpdol_U             | (alpha-D-Mannosyl)4-beta-D-mannosyl-diacetylchitobiosyldiphosphodolichol, human uterine homolog |                                                       | C1485H2440N200420P20               | -20    | Endoplasmic Reticulum |
| m5masnB1              | (alpha-D-mannosyl)5-beta-D-mannosyl-diacetylchitobiosyl-asparagine (protein)                    |                                                       | C52H87N2O40X                       | 0      | Golgi Apparatus       |
| m5masnB2              | (alpha-D-mannosyl)5-beta-D-mannosyl-diacetylchitobiosyl-asparagine (protein)                    |                                                       | C52H87N2O40X                       | 0      | Golgi Apparatus       |
| m5masnC               | (alpha-D-mannosyl)5-beta-D-mannosyl-diacetylchitobiosyl-asparagine (protein)                    |                                                       | C52H87N2O40X                       | 0      | Golgi Apparatus       |
| m5mpdol_L             | (alpha-D-Mannosyl)5-beta-D-mannosyl-diacetylchitobiosyldiphosphodolichol, human liver homolog   |                                                       | C1600H2628N200470P20               | -20    | Endoplasmic Reticulum |
| m5mpdol_U             | (alpha-D-Mannosyl)5-beta-D-mannosyl-diacetylchitobiosyldiphosphodolichol, human uterine homolog |                                                       | C1545H2540N200470P20               | -20    | Endoplasmic Reticulum |
| m6masnA               | (alpha-D-mannosyl)6-beta-D-mannosyl-diacetylchitobiosyl-asparagine (protein)                    |                                                       | C58H97N2O45X                       | 0      | Golgi Apparatus       |
| m6masnB1              | (alpha-D-mannosyl)6-beta-D-mannosyl-diacetylchitobiosyl-asparagine (protein)                    |                                                       | C58H97N2O45X                       | 0      | Golgi Apparatus       |
| m6masnB2              | (alpha-D-mannosyl)6-beta-D-mannosyl-diacetylchitobiosyl-asparagine (protein)                    |                                                       | C58H97N2O45X                       | 0      | Golgi Apparatus       |
| m6masnC               | (alpha-D-mannosyl)6-beta-D-mannosyl-diacetylchitobiosyl-asparagine (protein)                    |                                                       | C58H97N2O45X                       | 0      | Golgi Apparatus       |
| m6mpdol_L             | (alpha-D-Mannosyl)6-beta-D-mannosyl-diacetylchitobiosyldiphosphodolichol, human liver homolog   |                                                       | C1660H2728N200520P20               | -20    | Endoplasmic Reticulum |
| m6mpdol_U             | (alpha-D-Mannosyl)6-beta-D-mannosyl-diacetylchitobiosyldiphosphodolichol, human uterine homolog |                                                       | C1605H2640N200520P20               | -20    | Endoplasmic Reticulum |
| m7masnA               | (alpha-D-mannosyl)7-beta-D-mannosyl-diacetylchitobiosyl-asparagine, isoform A (protein)         |                                                       | C64H107N2O50X                      | 0      | Golgi Apparatus       |
| m7masnB               | (alpha-D-mannosyl)7-beta-D-mannosyl-diacetylchitobiosyl-asparagine, isoform B (protein)         |                                                       | C64H107N2O50X                      | 0      | Golgi Apparatus       |

| Abbreviation          | Metabolite Name                                                                                                                       | Synonyms                                                                                                                                        | Formula                            | Charge | Compartment           |
|-----------------------|---------------------------------------------------------------------------------------------------------------------------------------|-------------------------------------------------------------------------------------------------------------------------------------------------|------------------------------------|--------|-----------------------|
| m7masnB               | (alpha-D-mannosyl)7-beta-D-mannosyl-diacetylchitobiosyl-asparagine, isoform B (protein)                                               |                                                                                                                                                 | C64H107N2O50X                      | 0      | Endoplasmic Reticulum |
| m7masnC               | (alpha-D-mannosyl)7-beta-D-mannosyl-diacetylchitobiosyl-asparagine, isoform C (protein)                                               |                                                                                                                                                 | C64H107N2O50X                      | 0      | Golgi Apparatus       |
| m7mpdol_L             | (alpha-D-Mannosyl)7-beta-D-mannosyl-diacetylchitobiosyldiphosphodolichol, human liver homolog                                         |                                                                                                                                                 | C1720H2828N20O570P20               | -20    | Endoplasmic Reticulum |
| m7mpdol_U             | (alpha-D-Mannosyl)7-beta-D-mannosyl-diacetylchitobiosyldiphosphodolichol, human uterine homolog                                       |                                                                                                                                                 | C1665H2740N20O570P20               | -20    | Endoplasmic Reticulum |
| m8masn                | (alpha-D-mannosyl)8-beta-D-mannosyl-diacetylchitobiosyl-asparagine (protein)                                                          |                                                                                                                                                 | C70H117N2O55X                      | 0      | Golgi Apparatus       |
| m8masn                | (alpha-D-mannosyl)8-beta-D-mannosyl-diacetylchitobiosyl-asparagine (protein)                                                          |                                                                                                                                                 | C70H117N2O55X                      | 0      | Endoplasmic Reticulum |
| m8mpdol_L             | (alpha-D-Mannosyl)8-beta-D-mannosyl-diacetylchitobiosyldiphosphodolichol, human liver homolog                                         |                                                                                                                                                 | C1780H2928N20O620P20               | -20    | Endoplasmic Reticulum |
| m8mpdol_U             | (alpha-D-Mannosyl)8-beta-D-mannosyl-diacetylchitobiosyldiphosphodolichol, human uterine homolog                                       |                                                                                                                                                 | C1725H2840N20O620P20               | -20    | Endoplasmic Reticulum |
| mag_hs                | monoacylglycerol 2 (homo sapiens)                                                                                                     |                                                                                                                                                 | C3H7O2FULLR2CO2                    | 0      | Cytosol               |
| mag_hs                | monoacylglycerol 2 (homo sapiens)                                                                                                     |                                                                                                                                                 | C3H7O2FULLR2CO2                    | 0      | Extracellular         |
| malACP                | Malonyl-[acyl-carrier protein]                                                                                                        |                                                                                                                                                 | C14H22N2O10PRS                     | -2     | Cytosol               |
| malACP                | Malonyl-[acyl-carrier protein]                                                                                                        |                                                                                                                                                 | C14H22N2O10PRS                     | -2     | Mitochondria          |
| malcoa                | Malonyl-CoA                                                                                                                           | Malonyl coenzyme A                                                                                                                              | C24H33N7O19P3S                     | 5      | Cytosol               |
| malcoa                | Malonyl-CoA                                                                                                                           | Malonyl coenzyme A                                                                                                                              | C24H33N7O19P3S                     | -5     | Mitochondria          |
| malcoa                | Malonyl-CoA                                                                                                                           | Malonyl coenzyme A                                                                                                                              | C24H33N7O19P3S                     | -5     | Peroxisome            |
| mal-L                 | L-Malate                                                                                                                              | (S)-Malate, L-2-Hydroxybutanedioic acid, L-Aspartic acid, L-Malic acid, Malate                                                                  | C4H4O5                             | -2     | Cytosol               |
| mal-L                 | L-Malate                                                                                                                              | (S)-Malate, L-2-Hydroxybutanedioic acid, L-Aspartic acid, L-Malic acid, Malate                                                                  | C4H4O5                             | -2     | Mitochondria          |
| malt                  | Maltose                                                                                                                               | 1-alpha-D-Glucopyranosyl-4-alpha-D-glucopyranose, Malt sugar                                                                                    | C12H22O11                          | 0      | Cytosol               |
| malt                  | Maltose                                                                                                                               | 1-alpha-D-Glucopyranosyl-4-alpha-D-glucopyranose, Malt sugar                                                                                    | C12H22O11                          | 0      | Extracellular         |
| malt                  | Maltose                                                                                                                               | 1-alpha-D-Glucopyranosyl-4-alpha-D-glucopyranose, Malt sugar                                                                                    | C12H22O11                          | 0      | Lysosome              |
| maltr                 | Maltotriose                                                                                                                           | Amylotriose, Maltotriose                                                                                                                        | C18H32O16                          | 0      | Cytosol               |
| maltr                 | Maltotriose                                                                                                                           | Amylotriose, Maltotriose                                                                                                                        | C18H32O16                          | 0      | Extracellular         |
| maltr                 | Maltotriose                                                                                                                           | Amylotriose, Maltotriose                                                                                                                        | C18H32O16                          | 0      | Lysosome              |
| man                   | D-Mannose                                                                                                                             | Carubiose, Mannose, Seminose                                                                                                                    | C6H12O6                            | 0      | Cytosol               |
| man                   | D-Mannose                                                                                                                             | Carubiose, Mannose, Seminose                                                                                                                    | C6H12O6                            | 0      | Extracellular         |
| man                   | D-Mannose                                                                                                                             | Carubiose, Mannose, Seminose                                                                                                                    | C6H12O6                            | 0      | Golgi Apparatus       |
| man                   | D-Mannose                                                                                                                             | Carubiose, Mannose, Seminose                                                                                                                    | C6H12O6                            | 0      | Lysosome              |
| man                   | D-Mannose                                                                                                                             | Carubiose, Mannose, Seminose                                                                                                                    | C6H12O6                            | 0      | Endoplasmic Reticulum |
| man1p                 | D-Mannose 1-phosphate                                                                                                                 | alpha-D-Mannose 1-phosphate                                                                                                                     | C6H11O9P                           | -2     | Cytosol               |
| man6p                 | D-Mannose 6-phosphate                                                                                                                 |                                                                                                                                                 | C6H11O9P                           | -2     | Cytosol               |
| melanin               | Melanin                                                                                                                               |                                                                                                                                                 | C9H6NO4                            | -1     | Cytosol               |
| melatn                | Melatonin                                                                                                                             | Melatonin, N-Acetyl-5-methoxytryptamine                                                                                                         | C13H16N2O2                         | 0      | Cytosol               |
| mem2emgacpail_hs      | ([[[(mannosyl),(phosphoethanolaminy)]-dimannosyl],[phosphoethanolaminy]]-mannosyl-glucosaminyl-acylphosphatidylinositol (M4B)         | [[[Man-],[PE-](Man)2-],[PE-]Man-GlcN-acylPI                                                                                                     | C59H110N3O40P3FULLR2CO2F ULLR2CO2  | 0      | Endoplasmic Reticulum |
| mem2emgacpail_prot_hs | ([[[(mannosyl),(phosphoethanolaminy)]-dimannosyl],[phosphoethanolaminy]]-mannosyl-glucosaminyl-acylphosphatidylinositol-Protein (M4B) |                                                                                                                                                 | C59H110N3O40P3FULLR2CO2F ULLR2CO2X | 0      | Endoplasmic Reticulum |
| memgacpail_hs         | (mannosyl),(phosphoethanolaminy)-mannosyl-glucosylaminyl-acylphosphatidylinositol (B)                                                 | [[Man-],[PE-]Man-GlcN-acylPI                                                                                                                    | C45H84N2O27P2FULLR2CO2F ULLR2CO2   | 0      | Endoplasmic Reticulum |
| meoh                  | Methanol                                                                                                                              | Methyl alcohol                                                                                                                                  | CH4O1                              | 0      | Cytosol               |
| meoh                  | Methanol                                                                                                                              | Methyl alcohol                                                                                                                                  | CH4O1                              | 0      | Extracellular         |
| meoh                  | Methanol                                                                                                                              | Methyl alcohol                                                                                                                                  | CH4O1                              | 0      | Lysosome              |
| meoh                  | Methanol                                                                                                                              | Methyl alcohol                                                                                                                                  | CH4O1                              | 0      | Endoplasmic Reticulum |
| mepi                  | Metanephrine                                                                                                                          | L-Metanephrine                                                                                                                                  | C10H16NO3                          | 1      | Cytosol               |
| mepi                  | Metanephrine                                                                                                                          | L-Metanephrine                                                                                                                                  | C10H16NO3                          | -1     | Extracellular         |
| mercplac              | 3-Mercaptolactate                                                                                                                     |                                                                                                                                                 | C3H5O3S                            | -1     | Cytosol               |
| mercplaccys           | 3-mercaptolactate-cysteine disulfide                                                                                                  |                                                                                                                                                 | C6H10O5S2N                         | -1     | Cytosol               |
| mercplaccys           | 3-mercaptolactate-cysteine disulfide                                                                                                  |                                                                                                                                                 | C6H10O5S2N                         | -1     | Extracellular         |
| mercppyr              | Mercaptopyruvate                                                                                                                      | 3-Mercaptopyruvate                                                                                                                              | C3H3O3S                            | -1     | Cytosol               |
| mercppyr              | Mercaptopyruvate                                                                                                                      | 3-Mercaptopyruvate                                                                                                                              | C3H3O3S                            | -1     | Mitochondria          |
| mescoa                | Mesaconyl-CoA                                                                                                                         |                                                                                                                                                 | C26H35N7O19P3S                     | -5     | Mitochondria          |
| mescon                | Mesaconate                                                                                                                            | 2-Methylfumarate, Mesaconic acid, Methylfumaric acid                                                                                            | C5H4O4                             | -2     | Mitochondria          |
| methf                 | 5,10-Methylenetetrahydrofolate                                                                                                        | (6R)-5,10-methylenetetrahydrofolate, 5,10-methylenetetrahydrofolate, N5,N10-methenyl-5,6,7,8-tetrahydrofolate, N5,N10-methenyl-tetrahydrofolate | C20H20N7O6                         | -1     | Cytosol               |
| methf                 | 5,10-Methylenetetrahydrofolate                                                                                                        | (6R)-5,10-methylenetetrahydrofolate, 5,10-methylenetetrahydrofolate, N5,N10-methenyl-5,6,7,8-tetrahydrofolate, N5,N10-methenyl-tetrahydrofolate | C20H20N7O6                         | -1     | Mitochondria          |
| met-L                 | L-Methionine                                                                                                                          | L-2-Amino-4-methylthiobutyric acid, Met                                                                                                         | C5H11NO2S                          | 0      | Cytosol               |
| met-L                 | L-Methionine                                                                                                                          | L-2-Amino-4-methylthiobutyric acid, Met                                                                                                         | C5H11NO2S                          | 0      | Extracellular         |
| mev-R                 | (R)-Mevalonate                                                                                                                        | 3,5-Dihydroxy-3-methylvaleric acid, Mevalonic acid                                                                                              | C6H11O4                            | -1     | Endoplasmic Reticulum |
| mev-R                 | (R)-Mevalonate                                                                                                                        | 3,5-Dihydroxy-3-methylvaleric acid, Mevalonic acid                                                                                              | C6H11O4                            | -1     | Peroxisome            |
| mgacpail_hs           | mannosyl-glucosaminyl-acylphosphatidylinositol (H2)                                                                                   | Man-GlcN-acylPI                                                                                                                                 | C37H68NO19FULLR2CO2F ULLR2CO2      | 0      | Endoplasmic Reticulum |



| Abbreviation | Metabolite Name                             | Synonyms                                                                                                                                                                                            | Formula        | Charge | Compartment  |
|--------------|---------------------------------------------|-----------------------------------------------------------------------------------------------------------------------------------------------------------------------------------------------------|----------------|--------|--------------|
| mhista       | N-Methylhistamine                           | 1-Methyl-4-(2-aminoethyl)imidazole, Methylhistamine                                                                                                                                                 | C6H12N3        | 1      | Cytosol      |
| mi13456p     | 1D-myo-Inositol 1,3,4,5,6-pentakisphosphate | D-myo-Inositol 1,3,4,5,6-pentakisphosphate, Inositol 1,3,4,5,6-pentakisphosphate                                                                                                                    | C6H7O21P5      | -10    | Cytosol      |
| mi13456p     | 1D-myo-Inositol 1,3,4,5,6-pentakisphosphate | D-myo-Inositol 1,3,4,5,6-pentakisphosphate, Inositol 1,3,4,5,6-pentakisphosphate                                                                                                                    | C6H7O21P5      | -10    | Nucleus      |
| mi1345p      | 1D-myo-Inositol 1,3,4,5-tetrakisphosphate   | D-myo-Inositol 1,3,4,5-tetrakisphosphate, Inositol 1,3,4,5-tetrakisphosphate                                                                                                                        | C6H8O18P4      | -8     | Cytosol      |
| mi1345p      | 1D-myo-Inositol 1,3,4,5-tetrakisphosphate   | D-myo-Inositol 1,3,4,5-tetrakisphosphate, Inositol 1,3,4,5-tetrakisphosphate                                                                                                                        | C6H8O18P4      | -8     | Nucleus      |
| mi1346p      | 1D-myo-Inositol 1,3,4,6-tetrakisphosphate   | D-myo-Inositol 1,3,4,6-tetrakisphosphate, Inositol 1,3,4,6-tetrakisphosphate                                                                                                                        | C6H8O18P4      | -8     | Cytosol      |
| mi1346p      | 1D-myo-Inositol 1,3,4,6-tetrakisphosphate   | D-myo-Inositol 1,3,4,6-tetrakisphosphate, Inositol 1,3,4,6-tetrakisphosphate                                                                                                                        | C6H8O18P4      | -8     | Nucleus      |
| mi134p       | 1D-myo-Inositol 1,3,4-trisphosphate         | Inositol 1,3,4-trisphosphate                                                                                                                                                                        | C6H9O15P3      | -6     | Cytosol      |
| mi13p        | 1D-myo-Inositol 1,3-bisphosphate            | D-myo-Inositol 1,3-bisphosphate, Inositol 1,3-bisphosphate, myo-Inositol 1,3-bisphosphate                                                                                                           | C6H10O12P2     | -4     | Cytosol      |
| mi1456p      | 1D-myo-Inositol 1,4,5,6-tetrakisphosphate   |                                                                                                                                                                                                     | C6H8O18P4      | -8     | Nucleus      |
| mi145p       | 1D-myo-Inositol 1,4,5-trisphosphate         | IP3, Inositol 1,4,5-trisphosphate                                                                                                                                                                   | C6H9O15P3      | -6     | Cytosol      |
| mi145p       | 1D-myo-Inositol 1,4,5-trisphosphate         | IP3, Inositol 1,4,5-trisphosphate                                                                                                                                                                   | C6H9O15P3      | -6     | Nucleus      |
| mi14p        | 1D-myo-Inositol 1,4-bisphosphate            | 1D-myo-Inositol 1,4-bisphosphate, Inositol 1, myo-Inositol 1                                                                                                                                        | C6H10O12P2     | -4     | Cytosol      |
| mi14p        | 1D-myo-Inositol 1,4-bisphosphate            | 1D-myo-Inositol 1,4-bisphosphate, Inositol 1, myo-Inositol 1                                                                                                                                        | C6H10O12P2     | -4     | Nucleus      |
| mi1p-D       | 1D-myo-Inositol 1-phosphate                 | 1D-myo-Inositol 1-monophosphate, 1L-myo-Inositol 1-phosphate, D-myo-Inositol 1-phosphate, Inositol 1-phosphate, L-myo-Inositol 1-phosphate, myo-Inositol 1-phosphate                                | C6H11O9P       | -2     | Cytosol      |
| mi1p-D       | 1D-myo-Inositol 1-phosphate                 | 1D-myo-Inositol 1-monophosphate, 1L-myo-Inositol 1-phosphate, D-myo-Inositol 1-phosphate, Inositol 1-phosphate, L-myo-Inositol 1-phosphate, myo-Inositol 1-phosphate                                | C6H11O9P       | -2     | Nucleus      |
| mi3456p      | 1D-myo-Inositol 3,4,5,6-tetrakisphosphate   | D-myo-Inositol 3,4,5,6-tetrakisphosphate, Inositol 3,4,5,6-tetrakisphosphate                                                                                                                        | C6H8O18P4      | -8     | Cytosol      |
| mi34p        | 1D-myo-Inositol 3,4-bisphosphate            | D-myo-Inositol 3,4-bisphosphate, Inositol 3,4-bisphosphate                                                                                                                                          | C6H10O12P2     | -4     | Cytosol      |
| mi3p-D       | 1D-myo-Inositol 3-phosphate                 | 1D-myo-Inositol 3-monophosphate, D-myo-Inositol 3-monophosphate, D-myo-Inositol 3-phosphate, Inositol 3-monophosphate, Inositol 3-phosphate, myo-Inositol 3-monophosphate, myo-Inositol 3-phosphate | C6H11O9P       | -2     | Cytosol      |
| mi4p-D       | 1D-myo-Inositol 4-phosphate                 | 1D-myo-Inositol 4-monophosphate, D-myo-Inositol 4-phosphate, Inositol 4-phosphate                                                                                                                   | C6H11O9P       | -2     | Cytosol      |
| micit        | methylisocitrate                            | (2S,3R)-3-Hydroxybutane-1,2,3-tricarboxylate, Methylisocitrate, Methylisocitric acid                                                                                                                | C7H7O7         | -3     | Cytosol      |
| minohp       | myo-Inositol hexakisphosphate               | 1D-myo-Inositol 1, 2, 3, 4, 5, 6-hexakisphosphate, D-myo-Inositol 1, Inositol 1, Phytate, Phytic acid, myo-Inositol 1, myo-Inositol hexakisphosphate                                                | C6H6O24P6      | -12    | Cytosol      |
| minohp       | myo-Inositol hexakisphosphate               | 1D-myo-Inositol 1, 2, 3, 4, 5, 6-hexakisphosphate, D-myo-Inositol 1, Inositol 1, Phytate, Phytic acid, myo-Inositol 1, myo-Inositol hexakisphosphate                                                | C6H6O24P6      | -12    | Nucleus      |
| mlthf        | 5,10-Methylenetetrahydrofolate              | 5,10-methylene-5,6,7,8-tetrahydrofolate, N5,N10-methylene-5,6,7,8-tetrahydrofolate, N5,N10-methylene-tetrahydrofolate                                                                               | C20H21N7O6     | -2     | Cytosol      |
| mlthf        | 5,10-Methylenetetrahydrofolate              | 5,10-methylene-5,6,7,8-tetrahydrofolate, N5,N10-methylene-5,6,7,8-tetrahydrofolate, N5,N10-methylene-tetrahydrofolate                                                                               | C20H21N7O6     | -2     | Mitochondria |
| mma          | monomethylamine                             | Methanamine, Methylamine                                                                                                                                                                            | C1H6N          | 1      | Cytosol      |
| mmcoa-R      | (R)-Methylmalonyl-CoA                       | (R)-2-Methyl-3-oxopropanoyl-CoA, (R)-2-Methyl-oxopropanoyl-CoA, (R)-3-Oxo-2-methylpropanoyl-CoA                                                                                                     | C25H35N7O19P3S | -5     | Mitochondria |
| mmcoa-S      | (S)-Methylmalonyl-CoA                       | (S)-2-Methyl-3-oxopropanoyl-CoA, (S)-2-Methyl-oxopropanoyl-CoA, (S)-3-oxo-2-methylpropanoyl-CoA, (S)-Methylmalonyl-coenzyme A                                                                       | C25H35N7O19P3S | -5     | Cytosol      |
| mmcoa-S      | (S)-Methylmalonyl-CoA                       | (S)-2-Methyl-3-oxopropanoyl-CoA, (S)-2-Methyl-oxopropanoyl-CoA, (S)-3-oxo-2-methylpropanoyl-CoA, (S)-Methylmalonyl-coenzyme A                                                                       | C25H35N7O19P3S | -5     | Mitochondria |
| mmcoa-S      | (S)-Methylmalonyl-CoA                       | (S)-2-Methyl-3-oxopropanoyl-CoA, (S)-2-Methyl-oxopropanoyl-CoA, (S)-3-oxo-2-methylpropanoyl-CoA, (S)-Methylmalonyl-coenzyme A                                                                       | C25H35N7O19P3S | -5     | Peroxisome   |
| mn           | beta-1,4-mannose-N-acetylglucosamine        |                                                                                                                                                                                                     | C14H25NO11     | 0      | Cytosol      |
| mn           | beta-1,4-mannose-N-acetylglucosamine        |                                                                                                                                                                                                     | C14H25NO11     | 0      | Lysosome     |

| Abbreviation | Metabolite Name                                                                                                                                                                                 | Synonyms                                                                                       | Formula              | Charge | Compartment           |
|--------------|-------------------------------------------------------------------------------------------------------------------------------------------------------------------------------------------------|------------------------------------------------------------------------------------------------|----------------------|--------|-----------------------|
| mpdol_L      | beta-D-Mannosyl diacetylchitobiosylidiphosphodolichol, human liver homolog                                                                                                                      | Man-beta1->4GlcNAc-PP-Dol, beta-1,4-D-Mannosylchitobiosylidiphosphodolichol                    | C1300H2128N20O220P20 | -20    | Cytosol               |
| mpdol_U      | beta-D-Mannosyl diacetylchitobiosylidiphosphodolichol, human uterine homolog                                                                                                                    | Man-beta1->4GlcNAc-PP-Dol, beta-1,4-D-Mannosylchitobiosylidiphosphodolichol                    | C1245H2040N20O220P20 | -20    | Cytosol               |
| msa          | Malonate semialdehyde                                                                                                                                                                           | 3-Oxopropanoate                                                                                | C3H3O3               | -1     | Cytosol               |
| msa          | Malonate semialdehyde                                                                                                                                                                           | 3-Oxopropanoate                                                                                | C3H3O3               | -1     | Mitochondria          |
| mtgxl        | Methylglyoxal                                                                                                                                                                                   | 2-Ketopropionaldehyde, 2-Oxopropanal, Pyruvaldehyde, Pyruvic aldehyde                          | C3H4O2               | 0      | Cytosol               |
| mtgxl        | Methylglyoxal                                                                                                                                                                                   | 2-Ketopropionaldehyde, 2-Oxopropanal, Pyruvaldehyde, Pyruvic aldehyde                          | C3H4O2               | 0      | Extracellular         |
| myrsACP      | Myristoyl-ACP (n-C14:0ACP)                                                                                                                                                                      | Fatty acid C14:0 ACP, Tetradecanoyl-[acp], Tetradecanoyl-[acyl-carrier protein]                | C25H47N2O8PRS        | -1     | Cytosol               |
| n2m2masn     | ((N-acetyl-D-glucosaminy)2-(alpha-D-mannosyl)2-beta-D-mannosyl-diacetylchitobiosyl)-L-asparagine (protein)                                                                                      |                                                                                                | C50H83N4O35X         | 0      | Golgi Apparatus       |
| n2m2mn       | de-Fuc, reducing GlcNAc removed, de-Sia, de-Gal form of PA6 (w/o peptide linkage)                                                                                                               |                                                                                                | C42H71N3O31          | 0      | Lysosome              |
| n2m2mn       | n2m2masn (w/o peptide linkage)                                                                                                                                                                  |                                                                                                | C58H97N5O41          | 0      | Cytosol               |
| n2m2mn       | n2m2masn (w/o peptide linkage)                                                                                                                                                                  |                                                                                                | C58H97N5O41          | 0      | Lysosome              |
| n2m2masn     | N-Acetyl-beta-D-glucosaminy-1,2-alpha-D-mannosyl-1,3-(N-acetyl-beta-D-glucosaminy-1,2-alpha-D-mannosyl-1,6)-(N-acetyl-beta-D-glucosaminy-1,4)-beta-D-mannosyl-1,4-N-acetyl-beta-D-glucosaminy-R |                                                                                                | C58H96N5O40X         | 0      | Extracellular         |
| n2m2masn     | N-Acetyl-beta-D-glucosaminy-1,2-alpha-D-mannosyl-1,3-(N-acetyl-beta-D-glucosaminy-1,2-alpha-D-mannosyl-1,6)-(N-acetyl-beta-D-glucosaminy-1,4)-beta-D-mannosyl-1,4-N-acetyl-beta-D-glucosaminy-R |                                                                                                | C58H96N5O40X         | 0      | Golgi Apparatus       |
| n2m2masn     | N-Acetyl-beta-D-glucosaminy-1,2-alpha-D-mannosyl-1,3-(N-acetyl-beta-D-glucosaminy-1,2-alpha-D-mannosyl-1,6)-(N-acetyl-beta-D-glucosaminy-1,4)-beta-D-mannosyl-1,4-N-acetyl-beta-D-glucosaminy-R |                                                                                                | C58H96N5O40X         | 0      | Lysosome              |
| n2m2mnn      | reducing GlcNAc removed form of n2m2masn (w/o peptide)                                                                                                                                          |                                                                                                | C50H84N4O36          | 0      | Cytosol               |
| n2m2mnn      | reducing GlcNAc removed form of n2m2masn (w/o peptide)                                                                                                                                          |                                                                                                | C50H84N4O36          | 0      | Lysosome              |
| n3m2masn     | ((N-acetyl-D-glucosaminy)3-(alpha-D-mannosyl)2-beta-D-mannosyl-diacetylchitobiosyl)-L-asparagine (protein)                                                                                      |                                                                                                | C58H96N5O40X         | 0      | Golgi Apparatus       |
| n4abutn      | N4-Acetylaminobutanol                                                                                                                                                                           |                                                                                                | C6H11NO2             | 0      | Cytosol               |
| n4abutn      | N4-Acetylaminobutanol                                                                                                                                                                           |                                                                                                | C6H11NO2             | 0      | Mitochondria          |
| n4m2masn     | ((N-acetyl-D-glucosaminy)4-(alpha-D-mannosyl)2-beta-D-mannosyl-diacetylchitobiosyl)-L-asparagine (protein)                                                                                      |                                                                                                | C66H109N6O45X        | 0      | Golgi Apparatus       |
| n5m2masn     | ((N-acetyl-D-glucosaminy)5-(alpha-D-mannosyl)2-beta-D-mannosyl-diacetylchitobiosyl)-L-asparagine (protein)                                                                                      |                                                                                                | C74H122N7O50X        | 0      | Golgi Apparatus       |
| na1          | Sodium                                                                                                                                                                                          | Na, Natrium                                                                                    | Na                   | 1      | Cytosol               |
| na1          | Sodium                                                                                                                                                                                          | Na, Natrium                                                                                    | Na                   | 1      | Extracellular         |
| na1          | Sodium                                                                                                                                                                                          | Na, Natrium                                                                                    | Na                   | 1      | Golgi Apparatus       |
| na1          | Sodium                                                                                                                                                                                          | Na, Natrium                                                                                    | Na                   | 1      | Peroxisome            |
| nac          | Nicotinate                                                                                                                                                                                      | 3-Pyridinecarboxylic acid, Niacin, Nicotinic acid                                              | C6H4NO2              | -1     | Cytosol               |
| nac          | Nicotinate                                                                                                                                                                                      | 3-Pyridinecarboxylic acid, Niacin, Nicotinic acid                                              | C6H4NO2              | -1     | Extracellular         |
| Nacasp       | N-Acetyl-L-aspartate                                                                                                                                                                            |                                                                                                | C6H7NO5              | -2     | Cytosol               |
| Nacasp       | N-Acetyl-L-aspartate                                                                                                                                                                            |                                                                                                | C6H7NO5              | -2     | Mitochondria          |
| Nacsertrn    | N-Acetylsertrotin                                                                                                                                                                               | N-Acetyl-5-hydroxytryptamine                                                                   | C12H14N2O2           | 0      | Cytosol               |
| nad          | Nicotinamide adenine dinucleotide                                                                                                                                                               | NAD, NAD+, beta-Diphosphopyridine Nucleotide, beta-NAD, beta-Nicotinamide adenine dinucleotide | C21H26N7O14P2        | -1     | Cytosol               |
| nad          | Nicotinamide adenine dinucleotide                                                                                                                                                               | NAD, NAD+, beta-Diphosphopyridine Nucleotide, beta-NAD, beta-Nicotinamide adenine dinucleotide | C21H26N7O14P2        | -1     | Extracellular         |
| nad          | Nicotinamide adenine dinucleotide                                                                                                                                                               | NAD, NAD+, beta-Diphosphopyridine Nucleotide, beta-NAD, beta-Nicotinamide adenine dinucleotide | C21H26N7O14P2        | -1     | Mitochondria          |
| nad          | Nicotinamide adenine dinucleotide                                                                                                                                                               | NAD, NAD+, beta-Diphosphopyridine Nucleotide, beta-NAD, beta-Nicotinamide adenine dinucleotide | C21H26N7O14P2        | -1     | Nucleus               |
| nad          | Nicotinamide adenine dinucleotide                                                                                                                                                               | NAD, NAD+, beta-Diphosphopyridine Nucleotide, beta-NAD, beta-Nicotinamide adenine dinucleotide | C21H26N7O14P2        | -1     | Endoplasmic Reticulum |
| nad          | Nicotinamide adenine dinucleotide                                                                                                                                                               | NAD, NAD+, beta-Diphosphopyridine Nucleotide, beta-NAD, beta-Nicotinamide adenine dinucleotide | C21H26N7O14P2        | -1     | Peroxisome            |
| nadh         | Nicotinamide adenine dinucleotide - reduced                                                                                                                                                     | DPNH, NADH                                                                                     | C21H27N7O14P2        | -2     | Cytosol               |
| nadh         | Nicotinamide adenine dinucleotide - reduced                                                                                                                                                     | DPNH, NADH                                                                                     | C21H27N7O14P2        | -2     | Mitochondria          |
| nadh         | Nicotinamide adenine dinucleotide - reduced                                                                                                                                                     | DPNH, NADH                                                                                     | C21H27N7O14P2        | -2     | Endoplasmic Reticulum |
| nadh         | Nicotinamide adenine dinucleotide - reduced                                                                                                                                                     | DPNH, NADH                                                                                     | C21H27N7O14P2        | -2     | Peroxisome            |
| nadp         | Nicotinamide adenine dinucleotide phosphate                                                                                                                                                     | NADP, NADP+, beta-Nicotinamide adenine dinucleotide phosphate                                  | C21H25N7O17P3        | -3     | Cytosol               |
| nadp         | Nicotinamide adenine dinucleotide phosphate                                                                                                                                                     | NADP, NADP+, beta-Nicotinamide adenine dinucleotide phosphate                                  | C21H25N7O17P3        | -3     | Extracellular         |
| nadp         | Nicotinamide adenine dinucleotide phosphate                                                                                                                                                     | NADP, NADP+, beta-Nicotinamide adenine dinucleotide phosphate                                  | C21H25N7O17P3        | -3     | Mitochondria          |
| nadp         | Nicotinamide adenine dinucleotide phosphate                                                                                                                                                     | NADP, NADP+, beta-Nicotinamide adenine dinucleotide phosphate                                  | C21H25N7O17P3        | -3     | Nucleus               |

| Abbreviation | Metabolite Name                                                                                          | Synonyms                                                                                                                                                      | Formula              | Charge | Compartment           |
|--------------|----------------------------------------------------------------------------------------------------------|---------------------------------------------------------------------------------------------------------------------------------------------------------------|----------------------|--------|-----------------------|
| nadp         | Nicotinamide adenine dinucleotide phosphate                                                              | NADP, NADP+, beta-Nicotinamide adenine dinucleotide phosphate                                                                                                 | C21H25N7O17P3        | -3     | Endoplasmic Reticulum |
| nadp         | Nicotinamide adenine dinucleotide phosphate                                                              | NADP, NADP+, beta-Nicotinamide adenine dinucleotide phosphate                                                                                                 | C21H25N7O17P3        | -3     | Peroxisome            |
| nadph        | Nicotinamide adenine dinucleotide phosphate - reduced                                                    | NADPH, TPNH, beta-triphosphopyridine nucleotide                                                                                                               | C21H26N7O17P3        | -4     | Cytosol               |
| nadph        | Nicotinamide adenine dinucleotide phosphate - reduced                                                    | NADPH, TPNH, beta-triphosphopyridine nucleotide                                                                                                               | C21H26N7O17P3        | -4     | Mitochondria          |
| nadph        | Nicotinamide adenine dinucleotide phosphate - reduced                                                    | NADPH, TPNH, beta-triphosphopyridine nucleotide                                                                                                               | C21H26N7O17P3        | -4     | Nucleus               |
| nadph        | Nicotinamide adenine dinucleotide phosphate - reduced                                                    | NADPH, TPNH, beta-triphosphopyridine nucleotide                                                                                                               | C21H26N7O17P3        | -4     | Endoplasmic Reticulum |
| nadph        | Nicotinamide adenine dinucleotide phosphate - reduced                                                    | NADPH, TPNH, beta-triphosphopyridine nucleotide                                                                                                               | C21H26N7O17P3        | -4     | Peroxisome            |
| naclc2p_L    | N-Acetyl-D-glucosaminyl-diphosphodolichol, human liver homolog                                           | N-Acetyl-D-glucosaminyl-diphosphodolichol                                                                                                                     | C1160H1898N10O120P20 | -20    | Cytosol               |
| naclc2p_U    | N-Acetyl-D-glucosaminyl-diphosphodolichol, human uterin homolog                                          |                                                                                                                                                               | C1105H1810N10O120P20 | -20    | Cytosol               |
| ncam         | Nicotinamide                                                                                             | Niacinamide, Nicotinic acid amide, Vitamin PP                                                                                                                 | C6H6N2O              | 0      | Cytosol               |
| ncam         | Nicotinamide                                                                                             | Niacinamide, Nicotinic acid amide, Vitamin PP                                                                                                                 | C6H6N2O              | 0      | Extracellular         |
| Ndmelys      | Protein N6,N6-dimethyl-L-lysine                                                                          | Protein N6,N6-dimethyl-L-lysine                                                                                                                               | C2H7X                | 2      | Nucleus               |
| nformanth    | N-Formylanthranilate                                                                                     | 2-(Formylamino)-benzoic acid, Formylanthranilate                                                                                                              | C8H6NO3              | -1     | Cytosol               |
| nh4          | Ammonium                                                                                                 | NH3                                                                                                                                                           | H4N                  | 1      | Cytosol               |
| nh4          | Ammonium                                                                                                 | NH3                                                                                                                                                           | H4N                  | 1      | Extracellular         |
| nh4          | Ammonium                                                                                                 | NH3                                                                                                                                                           | H4N                  | 1      | Mitochondria          |
| nh4          | Ammonium                                                                                                 | NH3                                                                                                                                                           | H4N                  | 1      | Nucleus               |
| nh4          | Ammonium                                                                                                 | NH3                                                                                                                                                           | H4N                  | 1      | Endoplasmic Reticulum |
| nh4          | Ammonium                                                                                                 | NH3                                                                                                                                                           | H4N                  | 1      | Peroxisome            |
| nicrns       | Nicotinate D-ribonucleoside                                                                              |                                                                                                                                                               | C11H13NO6            | 0      | Cytosol               |
| nicrnt       | Nicotinate D-ribonucleotide                                                                              | Nicotinate ribonucleotide, Nicotinic acid ribonucleotide, beta-Nicotinate D-ribonucleotide                                                                    | C11H12NO9P           | -2     | Cytosol               |
| nicrnt       | Nicotinate D-ribonucleotide                                                                              | Nicotinate ribonucleotide, Nicotinic acid ribonucleotide, beta-Nicotinate D-ribonucleotide                                                                    | C11H12NO9P           | -2     | Mitochondria          |
| nicrnt       | Nicotinate D-ribonucleotide                                                                              | Nicotinate ribonucleotide, Nicotinic acid ribonucleotide, beta-Nicotinate D-ribonucleotide                                                                    | C11H12NO9P           | -2     | Nucleus               |
| nifedipine   | nifedipine                                                                                               | Adalat [MeSH: Nifedipine], Hexadilat, Introcar, Kordafen, Nifedidor, Oxcord, Procardia, Procardia [MeSH: Nifedipine], Tibricol, nifedipine [MeSH: Nifedipine] | C17H18N2O6           | 0      | Cytosol               |
| nifedipine   | nifedipine                                                                                               | Adalat [MeSH: Nifedipine], Hexadilat, Introcar, Kordafen, Nifedidor, Oxcord, Procardia, Procardia [MeSH: Nifedipine], Tibricol, nifedipine [MeSH: Nifedipine] | C17H18N2O6           | 0      | Extracellular         |
| nm2masn      | (N-acetyl-D-glucosaminyl-(alpha-D-mannosyl)2-beta-D-mannosyl-diacetylchitobiosyl)-L-asparagine (protein) |                                                                                                                                                               | C42H70N3O30X         | 0      | Golgi Apparatus       |
| nm4masn      | (N-acetyl-D-glucosaminyl-(alpha-D-mannosyl)4-beta-D-mannosyl-diacetylchitobiosyl)-L-asparagine (protein) |                                                                                                                                                               | C54H90N3O40X         | 0      | Golgi Apparatus       |
| Nimelys      | Histone N6-methyl-L-lysine                                                                               |                                                                                                                                                               | CXH4                 | 1      | Nucleus               |
| nmn          | NMN                                                                                                      | Nicotinamide D-ribonucleotide, Nicotinamide mononucleotide, Nicotinamide ribonucleotide                                                                       | C11H14N2O8P          | -1     | Cytosol               |
| nmn          | NMN                                                                                                      | Nicotinamide D-ribonucleotide, Nicotinamide mononucleotide, Nicotinamide ribonucleotide                                                                       | C11H14N2O8P          | -1     | Mitochondria          |
| nmn          | NMN                                                                                                      | Nicotinamide D-ribonucleotide, Nicotinamide mononucleotide, Nicotinamide ribonucleotide                                                                       | C11H14N2O8P          | -1     | Nucleus               |
| nmptc        | N-Methylputrescine                                                                                       |                                                                                                                                                               | C5H16N2              | 2      | Cytosol               |
| nmhsrtn      | N-Methylserotonin                                                                                        |                                                                                                                                                               | C11H15N2O            | 1      | Cytosol               |
| no           | Nitric oxide                                                                                             | NO, Nitrogen monoxide                                                                                                                                         | NO                   | 0      | Cytosol               |
| no           | Nitric oxide                                                                                             | NO, Nitrogen monoxide                                                                                                                                         | NO                   | 0      | Extracellular         |
| normete-L    | L-Normetanephrine                                                                                        |                                                                                                                                                               | C9H14NO3             | 1      | Cytosol               |
| npth         | Naphthalene                                                                                              |                                                                                                                                                               | C10H8                | 0      | Cytosol               |
| npth         | Naphthalene                                                                                              |                                                                                                                                                               | C10H8                | 0      | Extracellular         |
| nrpphr       | Norepinephrine                                                                                           | 2-benzenediol, 4-[(1R)-2-Amino-1-hydroxyethyl]-Arterenol, L-Noradrenaline, Noradrenaline                                                                      | C8H12NO3             | 1      | Cytosol               |
| nrpphr       | Norepinephrine                                                                                           | 2-benzenediol, 4-[(1R)-2-Amino-1-hydroxyethyl]-Arterenol, L-Noradrenaline, Noradrenaline                                                                      | C8H12NO3             | 1      | Extracellular         |
| nrpphrsf     | Sulfate derivative of norepinephrine                                                                     |                                                                                                                                                               | C8H11NO6S            | 0      | Cytosol               |
| nrpphrsf     | Sulfate derivative of norepinephrine                                                                     |                                                                                                                                                               | C8H11NO6S            | 0      | Extracellular         |
| nrvc         | nervonic acid                                                                                            | (Z)-15-Tetracosenoic acid, Nervonic acid, tetracos-15-enoic acid                                                                                              | C24H45O2             | -1     | Cytosol               |
| nrvc         | nervonic acid                                                                                            | (Z)-15-Tetracosenoic acid, Nervonic acid, tetracos-15-enoic acid                                                                                              | C24H45O2             | -1     | Extracellular         |
| nrvccoa      | nervonyl coenzyme A                                                                                      |                                                                                                                                                               | C45H76N7O17P3S       | -4     | Cytosol               |
| nrvccoa      | nervonyl coenzyme A                                                                                      |                                                                                                                                                               | C45H76N7O17P3S       | -4     | Mitochondria          |
| nrvccoa      | nervonyl coenzyme A                                                                                      |                                                                                                                                                               | C45H76N7O17P3S       | -4     | Peroxisome            |
| nrvcnrm      | Nervonyl carnitine                                                                                       | nervonic acid - carnitine                                                                                                                                     | C31H59NO4            | 0      | Cytosol               |
| nrvcnrm      | Nervonyl carnitine                                                                                       | nervonic acid - carnitine                                                                                                                                     | C31H59NO4            | 0      | Mitochondria          |
| ntm2amep     | N-Trimethyl-2-aminoethylphosphonate                                                                      | 2-Trimethylaminoethylphosphonate                                                                                                                              | C5H13NO3P            | -1     | Cytosol               |
| Nimelys      | Protein N6,N6,N6-trimethyl-L-lysine                                                                      | Protein N6,N6,N6-trimethyl-L-lysine                                                                                                                           | C3H10X               | 3      | Nucleus               |
| Nimelys      | Protein N6,N6,N6-trimethyl-L-lysine                                                                      | Protein N6,N6,N6-trimethyl-L-lysine                                                                                                                           | C3H10X               | 3      | Endoplasmic Reticulum |

| Abbreviation | Metabolite Name                                       | Synonyms                                                                                                                         | Formula                | Charge | Compartment           |
|--------------|-------------------------------------------------------|----------------------------------------------------------------------------------------------------------------------------------|------------------------|--------|-----------------------|
| nwharg       | N-(omega)-Hydroxyarginine                             |                                                                                                                                  | C6H15N4O3              | 1      | Cytosol               |
| o2           | O2                                                    | Oxygen, dioxygen                                                                                                                 | O2                     | 0      | Cytosol               |
| o2           | O2                                                    | Oxygen, dioxygen                                                                                                                 | O2                     | 0      | Extracellular         |
| o2           | O2                                                    | Oxygen, dioxygen                                                                                                                 | O2                     | 0      | Mitochondria          |
| o2           | O2                                                    | Oxygen, dioxygen                                                                                                                 | O2                     | 0      | Nucleus               |
| o2           | O2                                                    | Oxygen, dioxygen                                                                                                                 | O2                     | 0      | Endoplasmic Reticulum |
| o2           | O2                                                    | Oxygen, dioxygen                                                                                                                 | O2                     | 0      | Peroxisome            |
| o2s          | Superoxide anion                                      | O2 free radical, O2.-                                                                                                            | O2                     | -1     | Cytosol               |
| o2s          | Superoxide anion                                      | O2 free radical, O2.-                                                                                                            | O2                     | -1     | Extracellular         |
| o2s          | Superoxide anion                                      | O2 free radical, O2.-                                                                                                            | O2                     | -1     | Mitochondria          |
| o2s          | Superoxide anion                                      | O2 free radical, O2.-                                                                                                            | O2                     | -1     | Nucleus               |
| o2s          | Superoxide anion                                      | O2 free radical, O2.-                                                                                                            | O2                     | -1     | Peroxisome            |
| oaa          | Oxaloacetate                                          | 2-oxobutanedioic acid, Oxalacetic acid, Oxaloacetic acid, Oxosuccinic acid                                                       | C4H2O5                 | -2     | Cytosol               |
| oaa          | Oxaloacetate                                          | 2-oxobutanedioic acid, Oxalacetic acid, Oxaloacetic acid, Oxosuccinic acid                                                       | C4H2O5                 | -2     | Mitochondria          |
| oaa          | Oxaloacetate                                          | 2-oxobutanedioic acid, Oxalacetic acid, Oxaloacetic acid, Oxosuccinic acid                                                       | C4H2O5                 | -2     | Peroxisome            |
| oagd3_hs     | 9-O-Acetylated GD3 (homo sapiens)                     | [Gal]1 (Glc)1 (Neu5Ac)1 (Neu5Ac9Ac)1 (Cer)1, 9-O-Ac-GD3, 9-O-Acetyl-GD3, 9-O-Acetylated GD3                                      | C54H90N3O29FULLRCD60b  | -2     | Cytosol               |
| oagd3_hs     | 9-O-Acetylated GD3 (homo sapiens)                     | [Gal]1 (Glc)1 (Neu5Ac)1 (Neu5Ac9Ac)1 (Cer)1, 9-O-Ac-GD3, 9-O-Acetyl-GD3, 9-O-Acetylated GD3                                      | C54H90N3O29FULLRCD60b  | -2     | Extracellular         |
| oagd3_hs     | 9-O-Acetylated GD3 (homo sapiens)                     | [Gal]1 (Glc)1 (Neu5Ac)1 (Neu5Ac9Ac)1 (Cer)1, 9-O-Ac-GD3, 9-O-Acetyl-GD3, 9-O-Acetylated GD3                                      | C54H90N3O29FULLRCD60b  | -2     | Golgi Apparatus       |
| oagt3_hs     | 9-O-Acetylated GT3 (homo sapiens)                     | [Gal]1 (Glc)1 (Neu5Ac)2 (Neu5Ac9Ac)1 (Cer)1, 9-O-Ac-GT3, 9-O-Acetylated GT3                                                      | C65H106N4O37FULLRCD60b | -3     | Cytosol               |
| oagt3_hs     | 9-O-Acetylated GT3 (homo sapiens)                     | [Gal]1 (Glc)1 (Neu5Ac)2 (Neu5Ac9Ac)1 (Cer)1, 9-O-Ac-GT3, 9-O-Acetylated GT3                                                      | C65H106N4O37FULLRCD60b | -3     | Extracellular         |
| oagt3_hs     | 9-O-Acetylated GT3 (homo sapiens)                     | [Gal]1 (Glc)1 (Neu5Ac)2 (Neu5Ac9Ac)1 (Cer)1, 9-O-Ac-GT3, 9-O-Acetylated GT3                                                      | C65H106N4O37FULLRCD60b | -3     | Golgi Apparatus       |
| occoa        | Octanoyl-CoA (n-C8:0CoA)                              |                                                                                                                                  | C29H46N7O17P3S         | -4     | Cytosol               |
| occoa        | Octanoyl-CoA (n-C8:0CoA)                              |                                                                                                                                  | C29H46N7O17P3S         | -4     | Mitochondria          |
| occoa        | Octanoyl-CoA (n-C8:0CoA)                              |                                                                                                                                  | C29H46N7O17P3S         | -4     | Peroxisome            |
| ocdca        | octadecanoate (n-C18:0)                               | Octadecanoic acid, Stearate, Stearic acid                                                                                        | C18H35O2               | -1     | Cytosol               |
| ocdca        | octadecanoate (n-C18:0)                               | Octadecanoic acid, Stearate, Stearic acid                                                                                        | C18H35O2               | -1     | Extracellular         |
| ocdcaACP     | Octadecenoyl-ACP (n-C18:0ACP)                         | stearoyl-ACP                                                                                                                     | C29H55N2O8PRSS         | -1     | Cytosol               |
| odcea        | octadecenoate (n-C18:1)                               | (9Z)-Octadecenoic acid, (Z)-Octadec-9-enoic acid, Oleic acid, octadecenoic acid, oleate                                          | C18H33O2               | -1     | Cytosol               |
| odcea        | octadecenoate (n-C18:1)                               | (9Z)-Octadecenoic acid, (Z)-Octadec-9-enoic acid, Oleic acid, octadecenoic acid, oleate                                          | C18H33O2               | -1     | Extracellular         |
| odcya        | octadecadienoate (n-C18:2)                            | 9,12-Octadecadienoic acid, octadecadienoic acid                                                                                  | C18H31O2               | -1     | Cytosol               |
| odcyaACP     | Octadecenoyl-ACP (n-C18:2ACP)                         |                                                                                                                                  | C29H51N2O8PRSS         | -1     | Cytosol               |
| octa         | octanoate (n-C8:0)                                    | Caprylic acid, Octanoic acid, Octylic acid                                                                                       | C8H15O2                | -1     | Cytosol               |
| octa         | octanoate (n-C8:0)                                    | Caprylic acid, Octanoic acid, Octylic acid                                                                                       | C8H15O2                | -1     | Extracellular         |
| octeACP      | cis-octadec-11-enoyl-[acyl-carrier protein] (n-C18:1) | Octadecenoyl-ACP (n-C18:1ACP), cis-vacc-11-enoyl-[acyl-carrier protein] (n-C18:1)                                                | C29H53N2O8PRSS         | -1     | Cytosol               |
| od2coa       | trans-Octadec-2-enoyl-CoA                             | elaidic acid coenzyme A                                                                                                          | C39H64N7O17P3S         | -4     | Cytosol               |
| od2coa       | trans-Octadec-2-enoyl-CoA                             | elaidic acid coenzyme A                                                                                                          | C39H64N7O17P3S         | -4     | Mitochondria          |
| oddecoa      | Octadecenoyl-CoA (n-C18:1CoA)                         | Oleoyl-CoA                                                                                                                       | C39H64N7O17P3S         | -4     | Cytosol               |
| oddecoa      | Octadecenoyl-CoA (n-C18:1CoA)                         | Oleoyl-CoA                                                                                                                       | C39H64N7O17P3S         | -4     | Mitochondria          |
| oddecoa      | Octadecenoyl-CoA (n-C18:1CoA)                         | Oleoyl-CoA                                                                                                                       | C39H64N7O17P3S         | -4     | Peroxisome            |
| odcern       | octadecenoyl carnitine                                |                                                                                                                                  | C25H47N04              | 0      | Cytosol               |
| odcern       | octadecenoyl carnitine                                |                                                                                                                                  | C25H47N04              | 0      | Mitochondria          |
| oh1          | hydroxide ion                                         | HO-, OH-                                                                                                                         | HO                     | -1     | Cytosol               |
| oh1          | hydroxide ion                                         | HO-, OH-                                                                                                                         | HO                     | -1     | Extracellular         |
| oh1          | hydroxide ion                                         | HO-, OH-                                                                                                                         | HO                     | -1     | Mitochondria          |
| omeprazole   | omeprazole                                            | Demeprazol, Dudencer, Emeproton, Epirazole, Gastrimut, Gastroloc, Gibnancer, Indurgan, Inhibitron, omeprazole [MeSH: Omeprazole] | C17H19N3O3S            | 0      | Cytosol               |
| omeprazole   | omeprazole                                            | Demeprazol, Dudencer, Emeproton, Epirazole, Gastrimut, Gastroloc, Gibnancer, Indurgan, Inhibitron, omeprazole [MeSH: Omeprazole] | C17H19N3O3S            | 0      | Extracellular         |
| onpthl       | naphthalene epoxide                                   |                                                                                                                                  | C10H8O                 | 0      | Cytosol               |
| onpthl       | naphthalene epoxide                                   |                                                                                                                                  | C10H8O                 | 0      | Extracellular         |
| oretin       | 4-oxo-retonic acid                                    |                                                                                                                                  | C20H27O3               | -1     | Cytosol               |
| oretin       | 4-oxo-retonic acid                                    |                                                                                                                                  | C20H27O3               | -1     | Nucleus               |
| orn          | Ornithine                                             | 2,5-Diaminopentanoate, 2,5-Diaminopentanoic acid, 2,5-Diaminovaleric acid, L-Ornithine                                           | CSH13N2O2              | 1      | Cytosol               |
| orn          | Ornithine                                             | 2,5-Diaminopentanoate, 2,5-Diaminopentanoic acid, 2,5-Diaminovaleric acid, L-Ornithine                                           | CSH13N2O2              | 1      | Extracellular         |
| orn          | Ornithine                                             | 2,5-Diaminopentanoate, 2,5-Diaminopentanoic acid, 2,5-Diaminovaleric acid, L-Ornithine                                           | CSH13N2O2              | 1      | Mitochondria          |
| om-D         | D-Ornithine                                           |                                                                                                                                  | CSH13N2O2              | 1      | Peroxisome            |
| orot         | Orotate                                               | Orotic acid, Uracil-6-carboxylic acid                                                                                            | CSH3N2O4               | -1     | Cytosol               |
| oro5p        | Orotidine 5'-phosphate                                | Orotidylic acid                                                                                                                  | C10H10N2O11P           | -3     | Cytosol               |
| oxa          | Oxalate                                               | Ethanedioic acid, Oxalic acid                                                                                                    | C2O4                   | -2     | Cytosol               |

| Abbreviation | Metabolite Name                                           | Synonyms                                                                               | Formula                          | Charge | Compartment           |
|--------------|-----------------------------------------------------------|----------------------------------------------------------------------------------------|----------------------------------|--------|-----------------------|
| oxa          | Oxalate                                                   | Ethanedioic acid, Oxalic acid                                                          | C2O4                             | -2     | Extracellular         |
| oxa          | Oxalate                                                   | Ethanedioic acid, Oxalic acid                                                          | C2O4                             | -2     | Peroxisome            |
| pa_hs        | phosphatidic acid (homo sapiens)                          | phosphatidate                                                                          | C3H5O4PFULLR2CO2FULLR2C<br>O2    | -2     | Cytosol               |
| pa_hs        | phosphatidic acid (homo sapiens)                          | phosphatidate                                                                          | C3H5O4PFULLR2CO2FULLR2C<br>O2    | -2     | Golgi Apparatus       |
| pa_hs        | phosphatidic acid (homo sapiens)                          | phosphatidate                                                                          | C3H5O4PFULLR2CO2FULLR2C<br>O2    | -2     | Mitochondria          |
| pa_hs        | phosphatidic acid (homo sapiens)                          | phosphatidate                                                                          | C3H5O4PFULLR2CO2FULLR2C<br>O2    | -2     | Nucleus               |
| pa_hs        | phosphatidic acid (homo sapiens)                          | phosphatidate                                                                          | C3H5O4PFULLR2CO2FULLR2C<br>O2    | -2     | Endoplasmic Reticulum |
| pac          | Phenylacetic acid                                         | Benzeneacetic acid, Benzylformic acid,<br>Phenylacetate                                | C8H7O2                           | -1     | Cytosol               |
| pacald       | Phenylacetaldehyde                                        | alpha-Tolualdehyde                                                                     | C8H8O                            | 0      | Cytosol               |
| paf_hs       | 1-alkyl-2-acteylglycerol 3-phosphocholine (homo sapiens)  | 1-Alkyl-2-acetyl-sn-glycero-3-phosphocholine, PA<br>platelet activating factor         | C11H23O4NPFULLR2CO2              | 0      | Cytosol               |
| paf_hs       | 1-alkyl 2-acteylglycerol 3-phosphocholine (homo sapiens)  | 1-Alkyl-2-acetyl-sn-glycero-3-phosphocholine, PA<br>platelet activating factor         | C11H23O4NPFULLR2CO2              | 0      | Extracellular         |
| pail_hs      | phosphatidylinositol (homo sapiens)                       | PtdIns                                                                                 | C9H16O9PFULLR2CO2FULLR2<br>CO2   | -1     | Cytosol               |
| pail_hs      | phosphatidylinositol (homo sapiens)                       | PtdIns                                                                                 | C9H16O9PFULLR2CO2FULLR2<br>CO2   | -1     | Nucleus               |
| pail_hs      | phosphatidylinositol (homo sapiens)                       | PtdIns                                                                                 | C9H16O9PFULLR2CO2FULLR2<br>CO2   | -1     | Endoplasmic Reticulum |
| pail345p_hs  | phosphatidylinositol-3,4,5-trisphosphate (Homo sapiens)   | PIP3, PtdIns(3,4,5)P3                                                                  | C9H13O18P4FULLR2CO2FULLR<br>2CO2 | -7     | Cytosol               |
| pail345p_hs  | phosphatidylinositol-3,4,5-trisphosphate (Homo sapiens)   | PIP3, PtdIns(3,4,5)P3                                                                  | C9H13O18P4FULLR2CO2FULLR<br>2CO2 | -7     | Nucleus               |
| pail34p_hs   | phosphatidylinositol-3,4-bisphosphate (Homo sapiens)      |                                                                                        | C9H14O15P3FULLR2CO2FULLR<br>2CO2 | -5     | Cytosol               |
| pail34p_hs   | phosphatidylinositol-3,4-bisphosphate (Homo sapiens)      |                                                                                        | C9H14O15P3FULLR2CO2FULLR<br>2CO2 | -5     | Nucleus               |
| pail34p_hs   | phosphatidylinositol-3,4-bisphosphate (Homo sapiens)      |                                                                                        | C9H14O15P3FULLR2CO2FULLR<br>2CO2 | -5     | Endoplasmic Reticulum |
| pail35p_hs   | phosphatidylinositol-3,5-bisphosphate (Homo sapiens)      |                                                                                        | C9H14O15P3FULLR2CO2FULLR<br>2CO2 | -5     | Cytosol               |
| pail35p_hs   | phosphatidylinositol-3,5-bisphosphate (Homo sapiens)      |                                                                                        | C9H14O15P3FULLR2CO2FULLR<br>2CO2 | -5     | Endoplasmic Reticulum |
| pail3p_hs    | 1-Phosphatidyl-1D-myo-inositol 3-phosphate (Homo sapiens) |                                                                                        | C9H15O12P2FULLR2CO2FULLR<br>2CO2 | -3     | Cytosol               |
| pail3p_hs    | 1-Phosphatidyl-1D-myo-inositol 3-phosphate (Homo sapiens) |                                                                                        | C9H15O12P2FULLR2CO2FULLR<br>2CO2 | -3     | Nucleus               |
| pail3p_hs    | 1-Phosphatidyl-1D-myo-inositol 3-phosphate (Homo sapiens) |                                                                                        | C9H15O12P2FULLR2CO2FULLR<br>2CO2 | -3     | Endoplasmic Reticulum |
| pail45p_hs   | phosphatidylinositol 4,5-bisphosphate (Homo sapiens)      | PIP2, PtdIns(4,5)P2, phosphatidylinositol<br>disphosphate                              | C9H14O15P3FULLR2CO2FULLR<br>2CO2 | -5     | Cytosol               |
| pail45p_hs   | phosphatidylinositol 4,5-bisphosphate (Homo sapiens)      | PIP2, PtdIns(4,5)P2, phosphatidylinositol<br>disphosphate                              | C9H14O15P3FULLR2CO2FULLR<br>2CO2 | -5     | Nucleus               |
| pail4p_hs    | 1-Phosphatidyl-1D-myo-inositol 4-phosphate (Homo sapiens) | PIP, PtdIns4P                                                                          | C9H15O12P2FULLR2CO2FULLR<br>2CO2 | -3     | Cytosol               |
| pail4p_hs    | 1-Phosphatidyl-1D-myo-inositol 4-phosphate (Homo sapiens) | PIP, PtdIns4P                                                                          | C9H15O12P2FULLR2CO2FULLR<br>2CO2 | -3     | Nucleus               |
| pail4p_hs    | 1-Phosphatidyl-1D-myo-inositol 4-phosphate (Homo sapiens) | PIP, PtdIns4P                                                                          | C9H15O12P2FULLR2CO2FULLR<br>2CO2 | -3     | Endoplasmic Reticulum |
| pail5p_hs    | 1-Phosphatidyl-1D-myo-inositol 5-phosphate (Homo sapiens) |                                                                                        | C9H15O12P2FULLR2CO2FULLR<br>2CO2 | -3     | Cytosol               |
| pail5p_hs    | 1-Phosphatidyl-1D-myo-inositol 5-phosphate (Homo sapiens) |                                                                                        | C9H15O12P2FULLR2CO2FULLR<br>2CO2 | -3     | Nucleus               |
| pail5p_hs    | 1-Phosphatidyl-1D-myo-inositol 5-phosphate (Homo sapiens) |                                                                                        | C9H15O12P2FULLR2CO2FULLR<br>2CO2 | -3     | Endoplasmic Reticulum |
| palmACP      | Palmitoyl-ACP (n-C16:0ACP)                                | Hexadecanoyl-[acyl], Hexadecanoyl-[acyl-carrier<br>protein], fa8-ACP, hexadecanoyl-ACP | C27H51N2O8PRS                    | -1     | Cytosol               |
| pan4p        | Pantetheine 4'-phosphate                                  | 4'-Phosphopantetheine, Phosphopantetheine                                              | C11H21N2O7PS                     | -2     | Cytosol               |
| pap          | Adenosine 3',5'-bisphosphate                              | 3'-Phosphoadenylylate, PAP, Phosphoadenosine<br>phosphate                              | C10H11N5O10P2                    | 4      | Cytosol               |
| pap          | Adenosine 3',5'-bisphosphate                              | 3'-Phosphoadenylylate, PAP, Phosphoadenosine<br>phosphate                              | C10H11N5O10P2                    | 4      | Golgi Apparatus       |
| paps         | 3'-Phosphoadenylyl sulfate                                | 3'-Phospho-5'-adenylyl sulfate, 3'-<br>Phosphoadenosine 5'-phosphosulfate, PAPS        | C10H11N5O13P2S                   | -4     | Cytosol               |
| paps         | 3'-Phosphoadenylyl sulfate                                | 3'-Phospho-5'-adenylyl sulfate, 3'-<br>Phosphoadenosine 5'-phosphosulfate, PAPS        | C10H11N5O13P2S                   | -4     | Golgi Apparatus       |
| pchol_hs     | Phosphatidylcholine (homo sapiens)                        |                                                                                        | C8H18NO4PFULLR2CO2FULLR<br>2CO2  | 0      | Cytosol               |
| pchol_hs     | Phosphatidylcholine (homo sapiens)                        |                                                                                        | C8H18NO4PFULLR2CO2FULLR<br>2CO2  | 0      | Extracellular         |
| pchol_hs     | Phosphatidylcholine (homo sapiens)                        |                                                                                        | C8H18NO4PFULLR2CO2FULLR<br>2CO2  | 0      | Golgi Apparatus       |
| pchol_hs     | Phosphatidylcholine (homo sapiens)                        |                                                                                        | C8H18NO4PFULLR2CO2FULLR<br>2CO2  | 0      | Mitochondria          |
| pchol_hs     | Phosphatidylcholine (homo sapiens)                        |                                                                                        | C8H18NO4PFULLR2CO2FULLR<br>2CO2  | 0      | Endoplasmic Reticulum |
| pcollg5hlys  | Procollagen 5-hydroxy-L-lysine                            |                                                                                        | C6H14N2O3                        | 0      | Cytosol               |
| pcollglys    | Procollagen L-lysine                                      |                                                                                        | C7H14N3O2R2                      | 1      | Cytosol               |
| pcreat       | Phosphocreatine                                           |                                                                                        | C4H9N3O5P                        | -1     | Cytosol               |
| pcreat       | Phosphocreatine                                           |                                                                                        | C4H9N3O5P                        | -1     | Mitochondria          |
| pcrn         | propionyl-carnitine                                       |                                                                                        | C10H19NO4                        | 0      | Cytosol               |
| pcrn         | propionyl-carnitine                                       |                                                                                        | C10H19NO4                        | 0      | Mitochondria          |
| pcrn         | propionyl-carnitine                                       |                                                                                        | C10H19NO4                        | 0      | Peroxisome            |

| Abbreviation | Metabolite Name                                | Synonyms                                                                                        | Formula            | Charge | Compartment           |
|--------------|------------------------------------------------|-------------------------------------------------------------------------------------------------|--------------------|--------|-----------------------|
| pd3          | Previtamin D3                                  |                                                                                                 | C27H44O            | 0      | Cytosol               |
| pdx5p        | Pyridoxine 5'-phosphate                        | Pyridoxine 5-phosphate, Pyridoxine phosphate                                                    | C8H10NO6P          | -2     | Cytosol               |
| pe_hs        | phosphatidylethanolamine (homo sapiens)        |                                                                                                 | C5H12NO4PFULLR2CO2 | 0      | Cytosol               |
| pe_hs        | phosphatidylethanolamine (homo sapiens)        |                                                                                                 | C5H12NO4PFULLR2CO2 | 0      | Extracellular         |
| pe_hs        | phosphatidylethanolamine (homo sapiens)        |                                                                                                 | C5H12NO4PFULLR2CO2 | 0      | Golgi Apparatus       |
| pe_hs        | phosphatidylethanolamine (homo sapiens)        |                                                                                                 | C5H12NO4PFULLR2CO2 | 0      | Mitochondria          |
| pe_hs        | phosphatidylethanolamine (homo sapiens)        |                                                                                                 | C5H12NO4PFULLR2CO2 | 0      | Endoplasmic Reticulum |
| peamn        | Phenethylamine                                 | 2-Phenylethylamine, Phenethylamine, Phenylethylamine, beta-Phenylethylamine                     | C8H12N             | 1      | Cytosol               |
| pegon        | pseudoecgonine                                 |                                                                                                 | C9H14NO3           | -1     | Endoplasmic Reticulum |
| pegoncoa     | Pseudoecgonyl-CoA                              |                                                                                                 | C30H46N8O18P3S     | -3     | Endoplasmic Reticulum |
| pep          | Phosphoenolpyruvate                            | PEP, Phosphoenolpyruvic acid                                                                    | C3H2O6P            | -3     | Cytosol               |
| pep          | Phosphoenolpyruvate                            | PEP, Phosphoenolpyruvic acid                                                                    | C3H2O6P            | -3     | Mitochondria          |
| peplys       | Peptidyl-L-lysine                              | L-Lysine-protein, Protein lysine                                                                | XH                 | 0      | Extracellular         |
| peplys       | Peptidyl-L-lysine                              | L-Lysine-protein, Protein lysine                                                                | XH                 | 0      | Nucleus               |
| pepslys      | peptide sans lysine                            | peptide without lysine (cleaved)                                                                | X                  | 0      | Endoplasmic Reticulum |
| peracd       | Perillic acid                                  |                                                                                                 | C10H13O2           | -1     | Cytosol               |
| peracd       | Perillic acid                                  |                                                                                                 | C10H13O2           | -1     | Mitochondria          |
| perillyl     | Perillyl alcohol                               | (-)-Perillyl alcohol, Perillyl alcohol                                                          | C10H16O            | 0      | Cytosol               |
| perillyl     | Perillyl alcohol                               | (-)-Perillyl alcohol, Perillyl alcohol                                                          | C10H16O            | 0      | Extracellular         |
| pglyc_hs     | phosphatidylglycerol (homo sapiens)            |                                                                                                 | C6H12O6PFULLR2CO2  | -1     | Cytosol               |
| pglyc_hs     | phosphatidylglycerol (homo sapiens)            |                                                                                                 | C6H12O6PFULLR2CO2  | -1     | Extracellular         |
| pgp_hs       | phosphatidyl glycerol phosphate (homo sapiens) |                                                                                                 | C6H11O9P2FULLR2CO2 | -3     | Cytosol               |
| phaccoa      | Phenylacetyl-CoA                               |                                                                                                 | C29H38N7O17P3S     | -4     | Cytosol               |
| pheacgln     | alpha-N-Phenylacetyl-L-glutamine               |                                                                                                 | C13H16N2O4         | 0      | Cytosol               |
| pheacgln     | alpha-N-Phenylacetyl-L-glutamine               |                                                                                                 | C13H16N2O4         | 0      | Extracellular         |
| phe-L        | L-Phenylalanine                                | (S)-Phenylalanine, (S)-alpha-amino-beta-phenylpropionic acid, 3-phenylalanine                   | C9H11NO2           | 0      | Cytosol               |
| phe-L        | L-Phenylalanine                                | (S)-Phenylalanine, (S)-alpha-amino-beta-phenylpropionic acid, 3-phenylalanine                   | C9H11NO2           | 0      | Extracellular         |
| phe-L        | L-Phenylalanine                                | (S)-Phenylalanine, (S)-alpha-amino-beta-phenylpropionic acid, 3-phenylalanine                   | C9H11NO2           | 0      | Mitochondria          |
| pheme        | Protoheme                                      | Haem, Heme, Heme B, hemeB                                                                       | C34H30FeN4O4       | -2     | Cytosol               |
| pheme        | Protoheme                                      | Haem, Heme, Heme B, hemeB                                                                       | C34H30FeN4O4       | -2     | Extracellular         |
| pheme        | Protoheme                                      | Haem, Heme, Heme B, hemeB                                                                       | C34H30FeN4O4       | -2     | Mitochondria          |
| phom         | O-Phospho-L-homoserine                         |                                                                                                 | C4H8NO6P           | -2     | Cytosol               |
| phpyr        | Phenylpyruvate                                 | 3-Phenyl-2-oxopropanoate, Phenylpyruvic acid, alpha-Ketohydrocinnamic acid, keto-Phenylpyruvate | C9H7O3             | -1     | Cytosol               |
| phpyr        | Phenylpyruvate                                 | 3-Phenyl-2-oxopropanoate, Phenylpyruvic acid, alpha-Ketohydrocinnamic acid, keto-Phenylpyruvate | C9H7O3             | -1     | Mitochondria          |
| phyQ         | Phylloquinone                                  | 2-Methyl-3-phytyl-1,4-naphthoquinone, Phylloquinone, Phytonadione, Vitamin K1                   | C31H46O2           | 0      | Cytosol               |
| phyQ         | Phylloquinone                                  | 2-Methyl-3-phytyl-1,4-naphthoquinone, Phylloquinone, Phytonadione, Vitamin K1                   | C31H46O2           | 0      | Extracellular         |
| phyt         | phytanic acid                                  | Phytanate, Phytanic acid                                                                        | C20H39O2           | -1     | Cytosol               |
| phyt         | phytanic acid                                  | Phytanate, Phytanic acid                                                                        | C20H39O2           | -1     | Extracellular         |
| phyt         | phytanic acid                                  | Phytanate, Phytanic acid                                                                        | C20H39O2           | -1     | Peroxisome            |
| phyt2ohcoa   | 2-Hydroxyphytanoyl-CoA                         |                                                                                                 | C41H70N7O18P3S     | -4     | Peroxisome            |
| phytcoa      | phytanoyl coa                                  | Phytanoyl-CoA, phytanic acid coenzyme a, phytanyl coa, phytanyl coenzyme a                      | C41H70N7O17P3S     | -4     | Cytosol               |
| phytcoa      | phytanoyl coa                                  | Phytanoyl-CoA, phytanic acid coenzyme a, phytanyl coa, phytanyl coenzyme a                      | C41H70N7O17P3S     | -4     | Peroxisome            |
| pi           | Phosphate                                      | Orthophosphate, Phosphoric acid, Pi                                                             | HO4P               | -2     | Cytosol               |
| pi           | Phosphate                                      | Orthophosphate, Phosphoric acid, Pi                                                             | HO4P               | -2     | Extracellular         |
| pi           | Phosphate                                      | Orthophosphate, Phosphoric acid, Pi                                                             | HO4P               | -2     | Golgi Apparatus       |
| pi           | Phosphate                                      | Orthophosphate, Phosphoric acid, Pi                                                             | HO4P               | -2     | Lysosome              |
| pi           | Phosphate                                      | Orthophosphate, Phosphoric acid, Pi                                                             | HO4P               | -2     | Mitochondria          |
| pi           | Phosphate                                      | Orthophosphate, Phosphoric acid, Pi                                                             | HO4P               | -2     | Nucleus               |
| pi           | Phosphate                                      | Orthophosphate, Phosphoric acid, Pi                                                             | HO4P               | -2     | Endoplasmic Reticulum |
| pi           | Phosphate                                      | Orthophosphate, Phosphoric acid, Pi                                                             | HO4P               | -2     | Peroxisome            |
| pmtcoa       | Palmitoyl-CoA (n-C16:0CoA)                     | Hexadecanoyl-CoA                                                                                | C37H62N7O17P3S     | -4     | Cytosol               |
| pmtcoa       | Palmitoyl-CoA (n-C16:0CoA)                     | Hexadecanoyl-CoA                                                                                | C37H62N7O17P3S     | -4     | Mitochondria          |
| pmtcoa       | Palmitoyl-CoA (n-C16:0CoA)                     | Hexadecanoyl-CoA                                                                                | C37H62N7O17P3S     | -4     | Peroxisome            |
| pmtcrn       | L-Palmitoylcarnitine                           |                                                                                                 | C23H45NO4          | 0      | Cytosol               |
| pmtcrn       | L-Palmitoylcarnitine                           |                                                                                                 | C23H45NO4          | 0      | Mitochondria          |
| pnto-R       | (R)-Pantothenate                               | D-Pantothenate, Pantothenate, Pantothenic acid                                                  | C9H16NO5           | -1     | Cytosol               |
| pnto-R       | (R)-Pantothenate                               | D-Pantothenate, Pantothenate, Pantothenic acid                                                  | C9H16NO5           | -1     | Extracellular         |
| pnto-R       | (R)-Pantothenate                               | D-Pantothenate, Pantothenate, Pantothenic acid                                                  | C9H16NO5           | -1     | Mitochondria          |
| ppa          | Propionate (n-C3:0)                            | Propanoate, Propanoic acid, Propionic acid                                                      | C3H5O2             | -1     | Cytosol               |
| ppa          | Propionate (n-C3:0)                            | Propanoate, Propanoic acid, Propionic acid                                                      | C3H5O2             | -1     | Extracellular         |

| Abbreviation | Metabolite Name                                            | Synonyms                                                                                                                                                                                    | Formula        | Charge | Compartment           |
|--------------|------------------------------------------------------------|---------------------------------------------------------------------------------------------------------------------------------------------------------------------------------------------|----------------|--------|-----------------------|
| ppa          | Propionate (n-C3:0)                                        | Propanoate, Propanoic acid, Propionic acid                                                                                                                                                  | C3H5O2         | -1     | Mitochondria          |
| ppbng        | Porphobilinogen                                            |                                                                                                                                                                                             | C10H13N2O4     | -1     | Cytosol               |
| ppcoa        | Propionyl-CoA                                              | Propionyl coenzyme A, Propionyl-CoA                                                                                                                                                         | C24H36N7O17P3S | -4     | Cytosol               |
| ppcoa        | Propionyl-CoA                                              | Propionyl coenzyme A, Propionyl-CoA                                                                                                                                                         | C24H36N7O17P3S | -4     | Mitochondria          |
| ppcoa        | Propionyl-CoA                                              | Propionyl coenzyme A, Propionyl-CoA                                                                                                                                                         | C24H36N7O17P3S | -4     | Peroxisome            |
| ppi          | Diphosphate                                                | PPi, Pyrophosphate, Pyrophosphoric acid                                                                                                                                                     | HO7P2          | -3     | Cytosol               |
| ppi          | Diphosphate                                                | PPi, Pyrophosphate, Pyrophosphoric acid                                                                                                                                                     | HO7P2          | -3     | Mitochondria          |
| ppi          | Diphosphate                                                | PPi, Pyrophosphate, Pyrophosphoric acid                                                                                                                                                     | HO7P2          | -3     | Nucleus               |
| ppi          | Diphosphate                                                | PPi, Pyrophosphate, Pyrophosphoric acid                                                                                                                                                     | HO7P2          | -3     | Endoplasmic Reticulum |
| ppi          | Diphosphate                                                | PPi, Pyrophosphate, Pyrophosphoric acid                                                                                                                                                     | HO7P2          | -3     | Peroxisome            |
| ppmi12346p   | 5-Diphosphoinositol pentakisphosphate                      | 5-PP-InsP5                                                                                                                                                                                  | C6H6O27P7      | -13    | Cytosol               |
| ppmi12346p   | 5-Diphosphoinositol pentakisphosphate                      | 5-PP-InsP5                                                                                                                                                                                  | C6H6O27P7      | -13    | Nucleus               |
| ppmi1346p    | Diphosphoinositol tetrakisphosphate                        |                                                                                                                                                                                             | C6H7O24P6      | -11    | Cytosol               |
| ppmi1346p    | Diphosphoinositol tetrakisphosphate                        |                                                                                                                                                                                             | C6H7O24P6      | -11    | Nucleus               |
| ppp9         | Protoporphyrin                                             | Protoporphyrin IX, Protoporphyrin IX                                                                                                                                                        | C34H32N4O4     | -2     | Mitochondria          |
| pppg9        | Protoporphyrinogen IX                                      |                                                                                                                                                                                             | C34H38N4O4     | -2     | Cytosol               |
| pppg9        | Protoporphyrinogen IX                                      |                                                                                                                                                                                             | C34H38N4O4     | -2     | Mitochondria          |
| pppi         | Inorganic triphosphate                                     |                                                                                                                                                                                             | HO10P3         | -4     | Cytosol               |
| pppi         | Inorganic triphosphate                                     |                                                                                                                                                                                             | HO10P3         | -4     | Mitochondria          |
| pppi         | Inorganic triphosphate                                     |                                                                                                                                                                                             | HO10P3         | -4     | Nucleus               |
| pram         | 5-Phospho-beta-D-riboseylamine                             | 5-Phospho-D-riboseylamine, 5-Phosphoribosyl-1-amine, 5-Phosphoribosylamine                                                                                                                  | C5H11NO7P      | -1     | Cytosol               |
| pre_prot     | glycophosphatidylinositol (GPI)-anchored protein precursor |                                                                                                                                                                                             | XY             | 0      | Endoplasmic Reticulum |
| prgnlone     | Pregnenolone                                               | 3beta-Hydroxypregn-5-en-20-one, 5-Pregnen-3beta-ol-20-one                                                                                                                                   | C21H32O2       | 0      | Cytosol               |
| prgnlone     | Pregnenolone                                               | 3beta-Hydroxypregn-5-en-20-one, 5-Pregnen-3beta-ol-20-one                                                                                                                                   | C21H32O2       | 0      | Mitochondria          |
| prgnlone     | Pregnenolone                                               | 3beta-Hydroxypregn-5-en-20-one, 5-Pregnen-3beta-ol-20-one                                                                                                                                   | C21H32O2       | 0      | Endoplasmic Reticulum |
| prgnlones    | pregnenolone sulfate                                       | 3beta-Hydroxypregn-5-en-20-one sulfate, 5-Pregnen-3beta-ol-20-one sulfate                                                                                                                   | C21H31O5S      | -1     | Cytosol               |
| prgnlones    | pregnenolone sulfate                                       | 3beta-Hydroxypregn-5-en-20-one sulfate, 5-Pregnen-3beta-ol-20-one sulfate                                                                                                                   | C21H31O5S      | -1     | Endoplasmic Reticulum |
| prgstn       | Progesterone                                               | 4-Pregnene-3,20-dione                                                                                                                                                                       | C21H30O2       | 0      | Cytosol               |
| prgstn       | Progesterone                                               | 4-Pregnene-3,20-dione                                                                                                                                                                       | C21H30O2       | 0      | Endoplasmic Reticulum |
| prist        | pristanic acid                                             | pristanic acid                                                                                                                                                                              | C19H37O2       | -1     | Cytosol               |
| prist        | pristanic acid                                             | pristanic acid                                                                                                                                                                              | C19H37O2       | -1     | Peroxisome            |
| pristanal    | pristanal                                                  |                                                                                                                                                                                             | C19H38O        | 0      | Cytosol               |
| pristanal    | pristanal                                                  |                                                                                                                                                                                             | C19H38O        | 0      | Peroxisome            |
| pristcoa     | pristanoyl coa                                             | pristanic acid coenzyme a, pristanoyl coa, pristanoyl coenzyme a                                                                                                                            | C40H68N7O17P3S | -4     | Cytosol               |
| pristcoa     | pristanoyl coa                                             | pristanic acid coenzyme a, pristanoyl coa, pristanoyl coenzyme a                                                                                                                            | C40H68N7O17P3S | -4     | Peroxisome            |
| pro-D        | D-Proline                                                  | D-Pyrrolidine-2-carboxylic acid                                                                                                                                                             | C5H9NO2        | 0      | Cytosol               |
| pro-D        | D-Proline                                                  | D-Pyrrolidine-2-carboxylic acid                                                                                                                                                             | C5H9NO2        | 0      | Extracellular         |
| pro-D        | D-Proline                                                  | D-Pyrrolidine-2-carboxylic acid                                                                                                                                                             | C5H9NO2        | 0      | Lysosome              |
| pro-D        | D-Proline                                                  | D-Pyrrolidine-2-carboxylic acid                                                                                                                                                             | C5H9NO2        | 0      | Peroxisome            |
| pro-L        | L-Proline                                                  | 2-Pyrrolidinecarboxylic acid, Pro                                                                                                                                                           | C5H9NO2        | 0      | Cytosol               |
| pro-L        | L-Proline                                                  | 2-Pyrrolidinecarboxylic acid, Pro                                                                                                                                                           | C5H9NO2        | 0      | Extracellular         |
| pro-L        | L-Proline                                                  | 2-Pyrrolidinecarboxylic acid, Pro                                                                                                                                                           | C5H9NO2        | 0      | Lysosome              |
| pro-L        | L-Proline                                                  | 2-Pyrrolidinecarboxylic acid, Pro                                                                                                                                                           | C5H9NO2        | 0      | Mitochondria          |
| pro-L        | L-Proline                                                  | 2-Pyrrolidinecarboxylic acid, Pro                                                                                                                                                           | C5H9NO2        | 0      | Endoplasmic Reticulum |
| prostg1      | (13E)-11alpha-Hydroxy-9,15-dioxoprost-13-enoate            | (13E)-11alpha-Hydroxy-9,15-dioxoprost-13-enoate                                                                                                                                             | C20H31O5       | -1     | Cytosol               |
| prostg2      | Prostaglandin D2                                           | (5Z, 13-dienoate, 13E)-(15S)-9alpha, 15-Dihydroxy-11-oxoprost-5                                                                                                                             | C20H31O5       | -1     | Cytosol               |
| prostg2      | Prostaglandin D2                                           | (5Z, 13-dienoate, 13E)-(15S)-9alpha, 15-Dihydroxy-11-oxoprost-5                                                                                                                             | C20H31O5       | -1     | Extracellular         |
| prostg2      | Prostaglandin D2                                           | (5Z, 13-dienoate, 13E)-(15S)-9alpha, 15-Dihydroxy-11-oxoprost-5                                                                                                                             | C20H31O5       | -1     | Endoplasmic Reticulum |
| prostge1     | Prostaglandin E1                                           | (13E)-(15S)-11alpha,15-Dihydroxy-9-oxoprost-13-enoate, Alprostadi, Befar, Prink, Prostaglandin E1                                                                                           | C20H33O5       | -1     | Cytosol               |
| prostge1     | Prostaglandin E1                                           | (13E)-(15S)-11alpha,15-Dihydroxy-9-oxoprost-13-enoate, Alprostadi, Befar, Prink, Prostaglandin E1                                                                                           | C20H33O5       | -1     | Extracellular         |
| prostge2     | Prostaglandin E2                                           | (5Z, 13-dienoate, 13E)-(15S)-11alpha, 15-Dihydroxy-9-oxoprost-13-enoate, 15-Dihydroxy-9-oxoprost-5                                                                                          | C20H31O5       | -1     | Cytosol               |
| prostge2     | Prostaglandin E2                                           | (5Z, 13-dienoate, 13E)-(15S)-11alpha, 15-Dihydroxy-9-oxoprost-13-enoate, 15-Dihydroxy-9-oxoprost-5                                                                                          | C20H31O5       | -1     | Extracellular         |
| prostge2     | Prostaglandin E2                                           | (5Z, 13-dienoate, 13E)-(15S)-11alpha, 15-Dihydroxy-9-oxoprost-13-enoate, 15-Dihydroxy-9-oxoprost-5                                                                                          | C20H31O5       | -1     | Endoplasmic Reticulum |
| prostgf2     | Prostaglandin F2alpha                                      | (+)-Prostaglandin F2a, Amoglandin, Cyclosin, Dinoprost, Enzaprost, Enzaprost F, PGF2a, Panacelan, Prostaglandin F2, Prostaglandin F2a, Prostarmon F, Prostin F 2 alpha, Protamodin, U 14583 | C20H33O5       | -1     | Cytosol               |

| Abbreviation | Metabolite Name                        | Synonyms                                                                                                                                                                                     | Formula                    | Charge | Compartment           |
|--------------|----------------------------------------|----------------------------------------------------------------------------------------------------------------------------------------------------------------------------------------------|----------------------------|--------|-----------------------|
| prostgf2     | Prostaglandin F2alpha                  | (+)-Prostaglandin F2a, Amoglandin, Cyclostin, Dinoprost, Enzaprost, Enzaprost F, PGF2a, Panacelan, Prostaglandin F2, Prostaglandin F2a, Prostarmon F, Prostin F 2 alpha, Protamodin, U 14583 | C20H33O5                   | -1     | Extracellular         |
| prostgh2     | Prostaglandin H2                       | (5Z, 11alpha-Epidoxy-15-hydroxyprosta-5, 13-dienoate, 13E)-(15S)-9alpha                                                                                                                      | C20H31O5                   | -1     | Cytosol               |
| prostgh2     | Prostaglandin H2                       | (5Z, 11alpha-Epidoxy-15-hydroxyprosta-5, 13-dienoate, 13E)-(15S)-9alpha                                                                                                                      | C20H31O5                   | -1     | Endoplasmic Reticulum |
| prostgi2     | Prostaglandin I2                       | Sdienoate, (5Z, 13-, 13E)-(15S)-6, 15-dihydroxyprosta-5, 9alpha-Epoxy-11alpha, PGI2, Prostacyclin                                                                                            | C20H31O5                   | -1     | Endoplasmic Reticulum |
| prpncoa      | Propenoyl-CoA                          | Acryloyl-CoA, Acrylyl-CoA                                                                                                                                                                    | C24H34N7O17P3S             | -4     | Mitochondria          |
| prpncoa      | Propenoyl-CoA                          | Acryloyl-CoA, Acrylyl-CoA                                                                                                                                                                    | C24H34N7O17P3S             | -4     | Peroxisome            |
| prpp         | 5-Phospho-alpha-D-ribose 1-diphosphate | 5-Phosphoribosyl 1-pyrophosphate, 5-Phosphoribosyl diphosphate, PRPP                                                                                                                         | C5H8O14P3                  | -5     | Cytosol               |
| ps_hs        | phosphatidylserine (homo sapiens)      | 1,2-Diacyl-sn-glycerol 3-phospho-L-serine, 3-O-sn-Phosphatidyl-L-serine, O3-Phosphatidyl-L-serine, Phosphatidyl-L-serine                                                                     | C6H11NO6FULLR2CO2FULLR2CO2 | -1     | Cytosol               |
| ps_hs        | phosphatidylserine (homo sapiens)      | 1,2-Diacyl-sn-glycerol 3-phospho-L-serine, 3-O-sn-Phosphatidyl-L-serine, O3-Phosphatidyl-L-serine, Phosphatidyl-L-serine                                                                     | C6H11NO6FULLR2CO2FULLR2CO2 | -1     | Extracellular         |
| ps_hs        | phosphatidylserine (homo sapiens)      | 1,2-Diacyl-sn-glycerol 3-phospho-L-serine, 3-O-sn-Phosphatidyl-L-serine, O3-Phosphatidyl-L-serine, Phosphatidyl-L-serine                                                                     | C6H11NO6FULLR2CO2FULLR2CO2 | -1     | Golgi Apparatus       |
| ps_hs        | phosphatidylserine (homo sapiens)      | 1,2-Diacyl-sn-glycerol 3-phospho-L-serine, 3-O-sn-Phosphatidyl-L-serine, O3-Phosphatidyl-L-serine, Phosphatidyl-L-serine                                                                     | C6H11NO6FULLR2CO2FULLR2CO2 | -1     | Mitochondria          |
| ps_hs        | phosphatidylserine (homo sapiens)      | 1,2-Diacyl-sn-glycerol 3-phospho-L-serine, 3-O-sn-Phosphatidyl-L-serine, O3-Phosphatidyl-L-serine, Phosphatidyl-L-serine                                                                     | C6H11NO6FULLR2CO2FULLR2CO2 | -1     | Endoplasmic Reticulum |
| pser-L       | O-Phospho-L-serine                     | 3-Phosphoserine                                                                                                                                                                              | C3H6NO6P                   | -2     | Cytosol               |
| pdca         | pentadecanoate                         | Pentadecanoic acid, n-Pentadecanoic Acid                                                                                                                                                     | C15H29O2                   | -1     | Cytosol               |
| pdca         | pentadecanoate                         | Pentadecanoic acid, n-Pentadecanoic Acid                                                                                                                                                     | C15H29O2                   | -1     | Extracellular         |
| pdcacoa      | pentadecanoyl Coenzyme A               | Pentadecanoic acid coenzyme a, n-Pentadecanoic Acid coa                                                                                                                                      | C36H60N7O17P3S             | -4     | Cytosol               |
| pdcacoa      | pentadecanoyl Coenzyme A               | Pentadecanoic acid coenzyme a, n-Pentadecanoic Acid coa                                                                                                                                      | C36H60N7O17P3S             | -4     | Mitochondria          |
| pdcacrn      | pentadenoyl carnitine                  | Pentadecanoic acid - carnitine, pentadecanoate carnitine                                                                                                                                     | C22H43NO4                  | 0      | Cytosol               |
| pdcacrn      | pentadenoyl carnitine                  | Pentadecanoic acid - carnitine, pentadecanoate carnitine                                                                                                                                     | C22H43NO4                  | 0      | Mitochondria          |
| ptrc         | Putrescine                             | 1,4-Butanediamine, 1,4-Diaminobutane, Tetramethylenediamine                                                                                                                                  | C4H14N2                    | 2      | Cytosol               |
| ptrc         | Putrescine                             | 1,4-Butanediamine, 1,4-Diaminobutane, Tetramethylenediamine                                                                                                                                  | C4H14N2                    | 2      | Mitochondria          |
| pth          | Pantetheine                            |                                                                                                                                                                                              | C11H22N2O4S                | 0      | Cytosol               |
| pyam5p       | Pyridoxamine 5'-phosphate              | Pyridoxamine 5-phosphate, Pyridoxamine phosphate                                                                                                                                             | C8H12N2O5P                 | -1     | Cytosol               |
| pyam5p       | Pyridoxamine 5'-phosphate              | Pyridoxamine 5-phosphate, Pyridoxamine phosphate                                                                                                                                             | C8H12N2O5P                 | -1     | Mitochondria          |
| pydam        | Pyridoxamine                           | PM                                                                                                                                                                                           | C8H13N2O2                  | 1      | Cytosol               |
| pydam        | Pyridoxamine                           | PM                                                                                                                                                                                           | C8H13N2O2                  | 1      | Extracellular         |
| pydx         | Pyridoxal                              |                                                                                                                                                                                              | C8H9NO3                    | 0      | Cytosol               |
| pydx         | Pyridoxal                              |                                                                                                                                                                                              | C8H9NO3                    | 0      | Extracellular         |
| pydx5p       | Pyridoxal 5'-phosphate                 | Pyridoxal 5-phosphate, Pyridoxal phosphate                                                                                                                                                   | C8H8NO6P                   | -2     | Cytosol               |
| pydx5p       | Pyridoxal 5'-phosphate                 | Pyridoxal 5-phosphate, Pyridoxal phosphate                                                                                                                                                   | C8H8NO6P                   | -2     | Mitochondria          |
| pydxn        | Pyridoxine                             | Pyridoxol, vitamin b6                                                                                                                                                                        | C8H11NO3                   | 0      | Cytosol               |
| pydxn        | Pyridoxine                             | Pyridoxol, vitamin b6                                                                                                                                                                        | C8H11NO3                   | 0      | Extracellular         |
| pylald       | Perillyl aldehyde                      | Perillaldehyde                                                                                                                                                                               | C10H14O                    | 0      | Cytosol               |
| pylald       | Perillyl aldehyde                      | Perillaldehyde                                                                                                                                                                               | C10H14O                    | 0      | Mitochondria          |
| pyr          | Pyruvate                               | 2-Ketopropionic Acid, 2-Oxopropanoate, 2-Oxopropanoic acid, Pyroracemic acid, Pyruvic acid, alpha-Ketopropionic acid                                                                         | C3H3O3                     | -1     | Cytosol               |
| pyr          | Pyruvate                               | 2-Ketopropionic Acid, 2-Oxopropanoate, 2-Oxopropanoic acid, Pyroracemic acid, Pyruvic acid, alpha-Ketopropionic acid                                                                         | C3H3O3                     | -1     | Extracellular         |
| pyr          | Pyruvate                               | 2-Ketopropionic Acid, 2-Oxopropanoate, 2-Oxopropanoic acid, Pyroracemic acid, Pyruvic acid, alpha-Ketopropionic acid                                                                         | C3H3O3                     | -1     | Mitochondria          |
| pyr          | Pyruvate                               | 2-Ketopropionic Acid, 2-Oxopropanoate, 2-Oxopropanoic acid, Pyroracemic acid, Pyruvic acid, alpha-Ketopropionic acid                                                                         | C3H3O3                     | -1     | Peroxisome            |
| q10          | Ubiquinone-10                          | ubidecarenone                                                                                                                                                                                | C59H90O4                   | 0      | Cytosol               |
| q10          | Ubiquinone-10                          | ubidecarenone                                                                                                                                                                                | C59H90O4                   | 0      | Mitochondria          |
| q10h2        | Ubiquinol-10                           |                                                                                                                                                                                              | C59H92O4                   | 0      | Cytosol               |
| q10h2        | Ubiquinol-10                           |                                                                                                                                                                                              | C59H92O4                   | 0      | Mitochondria          |



| Abbreviation   | Metabolite Name                   | Synonyms                                                                                                                                                                                                                                                                                                                                                                                                                                                                                                                                                                                                                                     | Formula            | Charge | Compartment           |
|----------------|-----------------------------------|----------------------------------------------------------------------------------------------------------------------------------------------------------------------------------------------------------------------------------------------------------------------------------------------------------------------------------------------------------------------------------------------------------------------------------------------------------------------------------------------------------------------------------------------------------------------------------------------------------------------------------------------|--------------------|--------|-----------------------|
| quln           | Quinolinate                       | 2,3-Pyridinedicarboxylic acid, Pyridine-2,3-dicarboxylate, Quinolinic acid                                                                                                                                                                                                                                                                                                                                                                                                                                                                                                                                                                   | C7H3NO4            | -2     | Cytosol               |
| R1coa_hs       | R group 1 Coenzyme A homo sapiens |                                                                                                                                                                                                                                                                                                                                                                                                                                                                                                                                                                                                                                              | XC02C21H31N7O15P3S | -4     | Cytosol               |
| R1coa_hs       | R group 1 Coenzyme A homo sapiens |                                                                                                                                                                                                                                                                                                                                                                                                                                                                                                                                                                                                                                              | XC02C21H31N7O15P3S | -4     | Endoplasmic Reticulum |
| r1p            | alpha-D-Ribose 1-phosphate        | D-Ribose 1-phosphate, Ribose 1-phosphate                                                                                                                                                                                                                                                                                                                                                                                                                                                                                                                                                                                                     | C5H9O8P            | -2     | Cytosol               |
| R2coa_hs       | R group 2 Coenzyme A homo sapiens |                                                                                                                                                                                                                                                                                                                                                                                                                                                                                                                                                                                                                                              | XC02C21H31N7O15P3S | -4     | Cytosol               |
| R2coa_hs       | R group 2 Coenzyme A homo sapiens |                                                                                                                                                                                                                                                                                                                                                                                                                                                                                                                                                                                                                                              | XC02C21H31N7O15P3S | -4     | Endoplasmic Reticulum |
| R3coa_hs       | R group 3 Coenzyme A homo sapiens |                                                                                                                                                                                                                                                                                                                                                                                                                                                                                                                                                                                                                                              | XC02C21H31N7O15P3S | -4     | Cytosol               |
| R4coa_hs       | R group 4 Coenzyme A homo sapiens |                                                                                                                                                                                                                                                                                                                                                                                                                                                                                                                                                                                                                                              | XC02C21H31N7O15P3S | -4     | Cytosol               |
| R5coa_hs       | R group 5 Coenzyme A homo sapiens |                                                                                                                                                                                                                                                                                                                                                                                                                                                                                                                                                                                                                                              | XC02C21H31N7O15P3S | -4     | Cytosol               |
| r5p            | alpha-D-Ribose 5-phosphate        | D-Ribose 5-phosphate, D-Ribose-5-phosphate, Ribose 5-phosphate                                                                                                                                                                                                                                                                                                                                                                                                                                                                                                                                                                               | C5H9O8P            | -2     | Cytosol               |
| r5p            | alpha-D-Ribose 5-phosphate        | D-Ribose 5-phosphate, D-Ribose-5-phosphate, Ribose 5-phosphate                                                                                                                                                                                                                                                                                                                                                                                                                                                                                                                                                                               | C5H9O8P            | -2     | Mitochondria          |
| R6coa_hs       | R group 6 Coenzyme A homo sapiens |                                                                                                                                                                                                                                                                                                                                                                                                                                                                                                                                                                                                                                              | XC02C21H31N7O15P3S | -4     | Cytosol               |
| rib-D          | D-Ribulose                        | D-Arabinoketose, D-Arabinulose, D-Erythro-2-pentulose, D-Riboketose                                                                                                                                                                                                                                                                                                                                                                                                                                                                                                                                                                          | C5H10O5            | 0      | Cytosol               |
| rbt            | Ribitol                           | Adonitol                                                                                                                                                                                                                                                                                                                                                                                                                                                                                                                                                                                                                                     | C5H12O5            | 0      | Cytosol               |
| rbt            | Ribitol                           | Adonitol                                                                                                                                                                                                                                                                                                                                                                                                                                                                                                                                                                                                                                     | C5H12O5            | 0      | Extracellular         |
| retfa          | fatty acid retinol                |                                                                                                                                                                                                                                                                                                                                                                                                                                                                                                                                                                                                                                              | C20H29OFULLR2CO    | 0      | Cytosol               |
| retfa          | fatty acid retinol                |                                                                                                                                                                                                                                                                                                                                                                                                                                                                                                                                                                                                                                              | C20H29OFULLR2CO    | 0      | Extracellular         |
| retinal        | Retinal                           | Retinene, Vitamin A aldehyde, all-trans-Retinal, all-trans-Retinene, all-trans-Vitamin A aldehyde                                                                                                                                                                                                                                                                                                                                                                                                                                                                                                                                            | C20H28O            | 0      | Cytosol               |
| retinal-11-cis | cis-11-retinal                    | 11-cis-Retinal, 11-cis-Retinene, 11-cis-Vitamin A aldehyde,                                                                                                                                                                                                                                                                                                                                                                                                                                                                                                                                                                                  | C20H28O            | 0      | Cytosol               |
| retinal-cis-13 | cis-13-retinal                    |                                                                                                                                                                                                                                                                                                                                                                                                                                                                                                                                                                                                                                              | C20H28O            | 0      | Cytosol               |
| retinal-cis-9  | cis-9-retinal                     |                                                                                                                                                                                                                                                                                                                                                                                                                                                                                                                                                                                                                                              | C20H28O            | 0      | Cytosol               |
| retinol        | Retinol                           | Vitamin A, Vitamin A1, all-trans-Retinol                                                                                                                                                                                                                                                                                                                                                                                                                                                                                                                                                                                                     | C20H30O            | 0      | Cytosol               |
| retinol        | Retinol                           | Vitamin A, Vitamin A1, all-trans-Retinol                                                                                                                                                                                                                                                                                                                                                                                                                                                                                                                                                                                                     | C20H30O            | 0      | Extracellular         |
| retinol-9-cis  | 9-cis-retinol                     |                                                                                                                                                                                                                                                                                                                                                                                                                                                                                                                                                                                                                                              | C20H30O            | 0      | Cytosol               |
| retinol-9-cis  | 9-cis-retinol                     |                                                                                                                                                                                                                                                                                                                                                                                                                                                                                                                                                                                                                                              | C20H30O            | 0      | Extracellular         |
| retinol-cis-11 | cis-11-retinol                    |                                                                                                                                                                                                                                                                                                                                                                                                                                                                                                                                                                                                                                              | C20H30O            | 0      | Cytosol               |
| retinol-cis-11 | cis-11-retinol                    |                                                                                                                                                                                                                                                                                                                                                                                                                                                                                                                                                                                                                                              | C20H30O            | 0      | Extracellular         |
| retinol-cis-13 | cis-13-retinol                    |                                                                                                                                                                                                                                                                                                                                                                                                                                                                                                                                                                                                                                              | C20H30O            | 0      | Cytosol               |
| retn           | Retinoate                         | (all-E)-, (all-E)-3, 2, 3, 4, 6, 6-trimethyl-1-cyclohexen-1-yl)-, 6-trimethyl-1-cyclohexen-1-yl)-6-trimethyl-1-cyclohexene-1-yl)-2, 7-Dimethyl-9-(7-dimethyl-9-(2, 8-Nonatetraenoic acid, 8-nonatetraenoic acid, 8-nonatetraenoic acid (ECL), AGN 100335, Acide retinoique (French) (DSL), German) (EINECS), Retin A, Retinoic acid, Ro 1-5488, Tretin M, Vitamin A acid, Vitamin A1 acid, all-(E)-Retinoic acid, all-trans-, all-trans-Retinoate, all-trans-Retinoic acid, all-trans-Tretinoin, all-trans-Vitamin A acid, all-trans-b-Retinoic acid, b-Retinoic acid, trans-Retinoic acid, tretinoin (English, tretinoine (French) (EINECS) | C20H27O2           | -1     | Cytosol               |
| retn           | Retinoate                         | (all-E)-, (all-E)-3, 2, 3, 4, 6, 6-trimethyl-1-cyclohexen-1-yl)-, 6-trimethyl-1-cyclohexen-1-yl)-6-trimethyl-1-cyclohexene-1-yl)-2, 7-Dimethyl-9-(7-dimethyl-9-(2, 8-Nonatetraenoic acid, 8-nonatetraenoic acid, 8-nonatetraenoic acid (ECL), AGN 100335, Acide retinoique (French) (DSL), German) (EINECS), Retin A, Retinoic acid, Ro 1-5488, Tretin M, Vitamin A acid, Vitamin A1 acid, all-(E)-Retinoic acid, all-trans-, all-trans-Retinoate, all-trans-Retinoic acid, all-trans-Tretinoin, all-trans-Vitamin A acid, all-trans-b-Retinoic acid, b-Retinoic acid, trans-Retinoic acid, tretinoin (English, tretinoine (French) (EINECS) | C20H27O2           | -1     | Extracellular         |
| retn           | Retinoate                         | (all-E)-, (all-E)-3, 2, 3, 4, 6, 6-trimethyl-1-cyclohexen-1-yl)-, 6-trimethyl-1-cyclohexen-1-yl)-6-trimethyl-1-cyclohexene-1-yl)-2, 7-Dimethyl-9-(7-dimethyl-9-(2, 8-Nonatetraenoic acid, 8-nonatetraenoic acid, 8-nonatetraenoic acid (ECL), AGN 100335, Acide retinoique (French) (DSL), German) (EINECS), Retin A, Retinoic acid, Ro 1-5488, Tretin M, Vitamin A acid, Vitamin A1 acid, all-(E)-Retinoic acid, all-trans-, all-trans-Retinoate, all-trans-Retinoic acid, all-trans-Tretinoin, all-trans-Vitamin A acid, all-trans-b-Retinoic acid, b-Retinoic acid, trans-Retinoic acid, tretinoin (English, tretinoine (French) (EINECS) | C20H27O2           | -1     | Nucleus               |

| Abbreviation                             | Metabolite Name                                                   | Synonyms                                                                                                                                                                                                                                                                                                                                                                                                                                                                                                                                                                                                                                       | Formula                 | Charge | Compartment           |
|------------------------------------------|-------------------------------------------------------------------|------------------------------------------------------------------------------------------------------------------------------------------------------------------------------------------------------------------------------------------------------------------------------------------------------------------------------------------------------------------------------------------------------------------------------------------------------------------------------------------------------------------------------------------------------------------------------------------------------------------------------------------------|-------------------------|--------|-----------------------|
| retn                                     | Retinoate                                                         | (all-E)-, (all-E)-3, 2, 3, 4, 6, 6-trimethyl-1-cyclohexen-1-yl)-, 6-trimethyl-1-cyclohexen-1-yl)-, 6-trimethyl-1-cyclohexene-1-yl)-2, 7-Dimethyl-9-(7-dimethyl-9-(2, 8-Nonatetraenoic acid, 8-nonatetraenoic acid, 8-nonatetraenoic acid (ECL), AGN 100335, Acide retinoique (French) (DSL), German) (EINECS), Retin A, Retinoic acid, Ro 1-5488, Tretin M, Vitamin A acid, Vitamin A1 acid, all-(E)-Retinoic acid, all-trans-, all-trans-Retinoate, all-trans-Retinoic acid, all-trans-Tretinoin, all-trans-Vitamin A acid, all-trans-b-Retinoic acid, b-Retinoic acid, trans-Retinoic acid, tretinoin (English, tretinoine (French) (EINECS) | C20H27O2                | -1     | Endoplasmic Reticulum |
| retcoa                                   | retinoyl CoA                                                      |                                                                                                                                                                                                                                                                                                                                                                                                                                                                                                                                                                                                                                                | C41H58N7O17P3S          | -4     | Cytosol               |
| retnglc                                  | retinoyl glucuronide                                              | all-trans-Retinoyl-beta-glucuronide, retinoate glucuronide                                                                                                                                                                                                                                                                                                                                                                                                                                                                                                                                                                                     | C26H35O8                | -1     | Cytosol               |
| retnglc                                  | retinoyl glucuronide                                              | all-trans-Retinoyl-beta-glucuronide, retinoate glucuronide                                                                                                                                                                                                                                                                                                                                                                                                                                                                                                                                                                                     | C26H35O8                | -1     | Extracellular         |
| retnglc                                  | retinoyl glucuronide                                              | all-trans-Retinoyl-beta-glucuronide, retinoate glucuronide                                                                                                                                                                                                                                                                                                                                                                                                                                                                                                                                                                                     | C26H35O8                | -1     | Endoplasmic Reticulum |
| retpalm [deleted 10/09/2005 06:18:49 PM] | Retinyl palmitate                                                 | Aquasol A (TN), Retinol palmitate, Retinyl palmitate, Vitamin A palmitate, all-trans-Retinyl palmitate;                                                                                                                                                                                                                                                                                                                                                                                                                                                                                                                                        | C36H60O2                | 0      | Extracellular         |
| rib-D                                    | D-Ribose                                                          |                                                                                                                                                                                                                                                                                                                                                                                                                                                                                                                                                                                                                                                | C5H10O5                 | 0      | Cytosol               |
| rib-D                                    | D-Ribose                                                          |                                                                                                                                                                                                                                                                                                                                                                                                                                                                                                                                                                                                                                                | C5H10O5                 | 0      | Extracellular         |
| ribflv                                   | Riboflavin                                                        | 7,8-Dimethyl-10-ribitylisoalloxazine, Lactoflavin, Vitamin B2                                                                                                                                                                                                                                                                                                                                                                                                                                                                                                                                                                                  | C17H20N4O6              | 0      | Cytosol               |
| ribflv                                   | Riboflavin                                                        | 7,8-Dimethyl-10-ribitylisoalloxazine, Lactoflavin, Vitamin B2                                                                                                                                                                                                                                                                                                                                                                                                                                                                                                                                                                                  | C17H20N4O6              | 0      | Extracellular         |
| rmam                                     | N-Ribosylmicosinamide                                             |                                                                                                                                                                                                                                                                                                                                                                                                                                                                                                                                                                                                                                                | C11H15N2O5              | -1     | Cytosol               |
| Rtotal                                   | R total                                                           |                                                                                                                                                                                                                                                                                                                                                                                                                                                                                                                                                                                                                                                | CO2FULLR                | -1     | Cytosol               |
| Rtotal                                   | R total                                                           |                                                                                                                                                                                                                                                                                                                                                                                                                                                                                                                                                                                                                                                | CO2FULLR                | -1     | Extracellular         |
| Rtotal                                   | R total                                                           |                                                                                                                                                                                                                                                                                                                                                                                                                                                                                                                                                                                                                                                | CO2FULLR                | -1     | Lysosome              |
| Rtotal                                   | R total                                                           |                                                                                                                                                                                                                                                                                                                                                                                                                                                                                                                                                                                                                                                | CO2FULLR                | -1     | Peroxisome            |
| Rtotal2                                  | R total 2 position                                                |                                                                                                                                                                                                                                                                                                                                                                                                                                                                                                                                                                                                                                                | CO2FULLR2               | -1     | Cytosol               |
| Rtotal2                                  | R total 2 position                                                |                                                                                                                                                                                                                                                                                                                                                                                                                                                                                                                                                                                                                                                | CO2FULLR2               | -1     | Extracellular         |
| Rtotal2coa                               | R total 2 coenzyme A                                              |                                                                                                                                                                                                                                                                                                                                                                                                                                                                                                                                                                                                                                                | CO2FULLR2C21H31N7O15P3S | -4     | Cytosol               |
| Rtotal2coa                               | R total 2 coenzyme A                                              |                                                                                                                                                                                                                                                                                                                                                                                                                                                                                                                                                                                                                                                | CO2FULLR2C21H31N7O15P3S | -4     | Mitochondria          |
| Rtotal2crn                               | R total 2 carnitine                                               |                                                                                                                                                                                                                                                                                                                                                                                                                                                                                                                                                                                                                                                | CO2FULLR2C7H14NO2       | 0      | Cytosol               |
| Rtotal2crn                               | R total 2 carnitine                                               |                                                                                                                                                                                                                                                                                                                                                                                                                                                                                                                                                                                                                                                | CO2FULLR2C7H14NO2       | 0      | Mitochondria          |
| Rtotal3                                  | R total 3 position                                                |                                                                                                                                                                                                                                                                                                                                                                                                                                                                                                                                                                                                                                                | CO2FULLR3               | -1     | Cytosol               |
| Rtotal3                                  | R total 3 position                                                |                                                                                                                                                                                                                                                                                                                                                                                                                                                                                                                                                                                                                                                | CO2FULLR3               | -1     | Extracellular         |
| Rtotal3coa                               | R total 3 Coenzyme A                                              |                                                                                                                                                                                                                                                                                                                                                                                                                                                                                                                                                                                                                                                | CO2FULLR3C21H31N7O15P3S | -4     | Cytosol               |
| Rtotal3coa                               | R total 3 Coenzyme A                                              |                                                                                                                                                                                                                                                                                                                                                                                                                                                                                                                                                                                                                                                | CO2FULLR3C21H31N7O15P3S | -4     | Mitochondria          |
| Rtotal3crn                               | R total 3 carnitine                                               |                                                                                                                                                                                                                                                                                                                                                                                                                                                                                                                                                                                                                                                | CO2FULLR3C7H14NO2       | 0      | Cytosol               |
| Rtotal3crn                               | R total 3 carnitine                                               |                                                                                                                                                                                                                                                                                                                                                                                                                                                                                                                                                                                                                                                | CO2FULLR3C7H14NO2       | 0      | Mitochondria          |
| Rtotalcoa                                | R total Coenzyme A                                                |                                                                                                                                                                                                                                                                                                                                                                                                                                                                                                                                                                                                                                                | CO2FULLRC21H31N7O15P3S  | -4     | Cytosol               |
| Rtotalcoa                                | R total Coenzyme A                                                |                                                                                                                                                                                                                                                                                                                                                                                                                                                                                                                                                                                                                                                | CO2FULLRC21H31N7O15P3S  | -4     | Mitochondria          |
| Rtotalcoa                                | R total Coenzyme A                                                |                                                                                                                                                                                                                                                                                                                                                                                                                                                                                                                                                                                                                                                | CO2FULLRC21H31N7O15P3S  | -4     | Peroxisome            |
| Rtotalcrn                                | R total carnitine                                                 |                                                                                                                                                                                                                                                                                                                                                                                                                                                                                                                                                                                                                                                | CO2FULLRC7H14NO2        | 0      | Cytosol               |
| Rtotalcrn                                | R total carnitine                                                 |                                                                                                                                                                                                                                                                                                                                                                                                                                                                                                                                                                                                                                                | CO2FULLRC7H14NO2        | 0      | Mitochondria          |
| ru5p-D                                   | D-Ribulose 5-phosphate                                            |                                                                                                                                                                                                                                                                                                                                                                                                                                                                                                                                                                                                                                                | C5H9O8P                 | -2     | Cytosol               |
| ru5p-D                                   | D-Ribulose 5-phosphate                                            |                                                                                                                                                                                                                                                                                                                                                                                                                                                                                                                                                                                                                                                | C5H9O8P                 | -2     | Endoplasmic Reticulum |
| s2l2fm2m2masn                            | PA6                                                               | HpxB1                                                                                                                                                                                                                                                                                                                                                                                                                                                                                                                                                                                                                                          | C90H145N6O65X           | -2     | Extracellular         |
| s2l2fm2m2masn                            | PA6                                                               | HpxB1                                                                                                                                                                                                                                                                                                                                                                                                                                                                                                                                                                                                                                          | C90H145N6O65X           | -2     | Lysosome              |
| s2l2fm2m2masn                            | PA6                                                               | HpxB1                                                                                                                                                                                                                                                                                                                                                                                                                                                                                                                                                                                                                                          | C90H145N6O65X           | -2     | Lysosome              |
| s2l2n2m2m                                | de-Fuc form of PA6 (w/o peptide linkage)                          |                                                                                                                                                                                                                                                                                                                                                                                                                                                                                                                                                                                                                                                | C84H136N6O62            | -2     | Cytosol               |
| s2l2n2m2m                                | de-Fuc form of PA6 (w/o peptide linkage)                          |                                                                                                                                                                                                                                                                                                                                                                                                                                                                                                                                                                                                                                                | C84H136N6O62            | -2     | Lysosome              |
| s2l2n2m2masn                             | de-Fuc form of PA6                                                |                                                                                                                                                                                                                                                                                                                                                                                                                                                                                                                                                                                                                                                | C84H135N6O61X           | -2     | Extracellular         |
| s2l2n2m2masn                             | de-Fuc form of PA6                                                |                                                                                                                                                                                                                                                                                                                                                                                                                                                                                                                                                                                                                                                | C84H135N6O61X           | -2     | Lysosome              |
| s2l2n2m2mn                               | de-Fuc, reducing GlcNAc removed form of PA6 (w/o peptide linkage) |                                                                                                                                                                                                                                                                                                                                                                                                                                                                                                                                                                                                                                                | C76H123N5O57            | -2     | Cytosol               |
| s2l2n2m2mn                               | de-Fuc, reducing GlcNAc removed form of PA6 (w/o peptide linkage) |                                                                                                                                                                                                                                                                                                                                                                                                                                                                                                                                                                                                                                                | C76H123N5O57            | -2     | Lysosome              |
| s7p                                      | Sedoheptulose 7-phosphate                                         | altro-Heptulose 7-phosphate                                                                                                                                                                                                                                                                                                                                                                                                                                                                                                                                                                                                                    | C7H13O10P               | -2     | Cytosol               |
| sacrcp-L                                 | L-Saccharopine                                                    | N6-(L-1,3-Dicarboxypropyl)-L-lysine, Saccharopin                                                                                                                                                                                                                                                                                                                                                                                                                                                                                                                                                                                               | C11H19N2O6              | -1     | Mitochondria          |
| sarcs                                    | Sarcosine                                                         | N-Methylglycine                                                                                                                                                                                                                                                                                                                                                                                                                                                                                                                                                                                                                                | C3H7NO2                 | 0      | Cytosol               |
| sarcs                                    | Sarcosine                                                         | N-Methylglycine                                                                                                                                                                                                                                                                                                                                                                                                                                                                                                                                                                                                                                | C3H7NO2                 | 0      | Extracellular         |
| sarcs                                    | Sarcosine                                                         | N-Methylglycine                                                                                                                                                                                                                                                                                                                                                                                                                                                                                                                                                                                                                                | C3H7NO2                 | 0      | Mitochondria          |
| sarcs                                    | Sarcosine                                                         | N-Methylglycine                                                                                                                                                                                                                                                                                                                                                                                                                                                                                                                                                                                                                                | C3H7NO2                 | 0      | Peroxisome            |
| sbt-D                                    | D-Sorbitol                                                        | Clucitol, D-Glucitol, D-Sorbit, D-Sorbitol, Glucitol, Gulitol, L-gulitol, Sorbit                                                                                                                                                                                                                                                                                                                                                                                                                                                                                                                                                               | C6H14O6                 | 0      | Cytosol               |
| seahcys                                  | Se-Adenosylselenohomocysteine                                     |                                                                                                                                                                                                                                                                                                                                                                                                                                                                                                                                                                                                                                                | C14H20N6O5Se            | 0      | Cytosol               |
| seahcys                                  | Se-Adenosylselenohomocysteine                                     |                                                                                                                                                                                                                                                                                                                                                                                                                                                                                                                                                                                                                                                | C14H20N6O5Se            | 0      | Nucleus               |
| seasmet                                  | Se-Adenosylselenomethionine                                       |                                                                                                                                                                                                                                                                                                                                                                                                                                                                                                                                                                                                                                                | C15H23N6O5Se            | 1      | Cytosol               |
| seasmet                                  | Se-Adenosylselenomethionine                                       |                                                                                                                                                                                                                                                                                                                                                                                                                                                                                                                                                                                                                                                | C15H23N6O5Se            | 1      | Nucleus               |
| sel                                      | Selenate                                                          | Selenate, Selenic acid                                                                                                                                                                                                                                                                                                                                                                                                                                                                                                                                                                                                                         | O4Se                    | -2     | Cytosol               |
| sel                                      | Selenate                                                          | Selenate, Selenic acid                                                                                                                                                                                                                                                                                                                                                                                                                                                                                                                                                                                                                         | O4Se                    | -2     | Extracellular         |
| selcys                                   | Selenocysteine                                                    |                                                                                                                                                                                                                                                                                                                                                                                                                                                                                                                                                                                                                                                | C3H7NO2Se               | 0      | Cytosol               |

| Abbreviation      | Metabolite Name                                                   | Synonyms                                                                             | Formula            | Charge | Compartment           |
|-------------------|-------------------------------------------------------------------|--------------------------------------------------------------------------------------|--------------------|--------|-----------------------|
| selcyst           | Selenocystathionine                                               | Selenocystathionine                                                                  | C7H14N2O4Se        | 0      | Cytosol               |
| selhcys           | Selenohomocysteine                                                |                                                                                      | C4H9NO2Se          | 0      | Cytosol               |
| selmeth           | Selenomethionine                                                  | Selenomethionine                                                                     | C5H11NO2Se         | 0      | Cytosol               |
| seln              | Selenide                                                          | Hydrogen selenide, Selenide                                                          | HSe                | -1     | Cytosol               |
| selnp             | Selenophosphate                                                   | Selenophosphate                                                                      | H2O3PSe            | -1     | Cytosol               |
| Ser/Thr           | protein-linked serine or threonine residue (O-glycosylation site) |                                                                                      | XH                 | 0      | Golgi Apparatus       |
| Ser/Thr           | protein-linked serine or threonine residue (O-glycosylation site) |                                                                                      | XH                 | 0      | Lysosome              |
| ser-D             | D-Serine                                                          | D-2-Amino-3-hydroxypropanoic acid                                                    | C3H7NO3            | 0      | Cytosol               |
| ser-D             | D-Serine                                                          | D-2-Amino-3-hydroxypropanoic acid                                                    | C3H7NO3            | 0      | Extracellular         |
| Ser-Gly/Ala-X-Gly | protein-linked serine residue (glycosaminoglycan attachment site) |                                                                                      | XH                 | 0      | Lysosome              |
| Ser-Gly/Ala-X-Gly | protein-linked serine residue (glycosaminoglycan attachment site) |                                                                                      | XH                 | 0      | Endoplasmic Reticulum |
| ser-L             | L-Serine                                                          | L-2-Amino-3-hydroxypropionic acid, L-3-Hydroxyalanine, Ser                           | C3H7NO3            | 0      | Cytosol               |
| ser-L             | L-Serine                                                          | L-2-Amino-3-hydroxypropionic acid, L-3-Hydroxyalanine, Ser                           | C3H7NO3            | 0      | Extracellular         |
| ser-L             | L-Serine                                                          | L-2-Amino-3-hydroxypropionic acid, L-3-Hydroxyalanine, Ser                           | C3H7NO3            | 0      | Mitochondria          |
| ser-L             | L-Serine                                                          | L-2-Amino-3-hydroxypropionic acid, L-3-Hydroxyalanine, Ser                           | C3H7NO3            | 0      | Peroxisome            |
| Sfgluth           | S-Formylglutathione                                               |                                                                                      | C11H16N3O7S        | -1     | Cytosol               |
| sgalside_hs       | sulfatide galactocerebroside (homo sapiens)                       | galactocerebroside 3-sulfate                                                         | C24H45NO10SFULLRCO | -1     | Cytosol               |
| sgalside_hs       | sulfatide galactocerebroside (homo sapiens)                       | galactocerebroside 3-sulfate                                                         | C24H45NO10SFULLRCO | -1     | Golgi Apparatus       |
| sgalside_hs       | sulfatide galactocerebroside (homo sapiens)                       | galactocerebroside 3-sulfate                                                         | C24H45NO10SFULLRCO | -1     | Lysosome              |
| sl-L              | L-sulfolactate                                                    | (S)-3-sulfolactate                                                                   | C3H4O6S            | -2     | Cytosol               |
| sl-L              | L-sulfolactate                                                    | (S)-3-sulfolactate                                                                   | C3H4O6S            | -2     | Extracellular         |
| sl-L              | L-sulfolactate                                                    | (S)-3-sulfolactate                                                                   | C3H4O6S            | -2     | Mitochondria          |
| so3               | Sulfite                                                           | Sulfurous acid                                                                       | O3S                | -2     | Cytosol               |
| so3               | Sulfite                                                           | Sulfurous acid                                                                       | O3S                | -2     | Mitochondria          |
| so4               | Sulfate                                                           | Sulfuric acid                                                                        | O4S                | -2     | Cytosol               |
| so4               | Sulfate                                                           | Sulfuric acid                                                                        | O4S                | -2     | Extracellular         |
| so4               | Sulfate                                                           | Sulfuric acid                                                                        | O4S                | -2     | Lysosome              |
| so4               | Sulfate                                                           | Sulfuric acid                                                                        | O4S                | -2     | Mitochondria          |
| so4               | Sulfate                                                           | Sulfuric acid                                                                        | O4S                | -2     | Endoplasmic Reticulum |
| spe_hs            | sphingosylphosphorylcholine (homo sapiens)                        |                                                                                      | C23H50N2O5P        | 1      | Cytosol               |
| spe_hs            | sphingosylphosphorylcholine (homo sapiens)                        |                                                                                      | C23H50N2O5P        | 1      | Extracellular         |
| sph1p             | Sphinganine 1-phosphate                                           | Dihydrosphingosine 1-phosphate                                                       | C18H39NO5P         | -1     | Cytosol               |
| sph1p             | Sphinganine 1-phosphate                                           | Dihydrosphingosine 1-phosphate                                                       | C18H39NO5P         | -1     | Extracellular         |
| sph1p             | Sphinganine 1-phosphate                                           | Dihydrosphingosine 1-phosphate                                                       | C18H39NO5P         | -1     | Endoplasmic Reticulum |
| sphgn             | Sphinganine                                                       | 2-Amino-1, 3-dihydroxyoctadecane, Dihydrosphingosine                                 | C18H40NO2          | 1      | Cytosol               |
| sphgn             | Sphinganine                                                       | 2-Amino-1, 3-dihydroxyoctadecane, Dihydrosphingosine                                 | C18H40NO2          | 1      | Endoplasmic Reticulum |
| sphings           | Sphingosine                                                       | Sphingene, Sphingoid                                                                 | C18H38NO2          | 1      | Cytosol               |
| sphings           | Sphingosine                                                       | Sphingene, Sphingoid                                                                 | C18H38NO2          | 1      | Lysosome              |
| sphings           | Sphingosine                                                       | Sphingene, Sphingoid                                                                 | C18H38NO2          | 1      | Endoplasmic Reticulum |
| sphmyln_hs        | sphingomyelin (homo sapiens)                                      |                                                                                      | C23H48N2O5PFULLRCO | 0      | Cytosol               |
| sphmyln_hs        | sphingomyelin (homo sapiens)                                      |                                                                                      | C23H48N2O5PFULLRCO | 0      | Golgi Apparatus       |
| sphmyln_hs        | sphingomyelin (homo sapiens)                                      |                                                                                      | C23H48N2O5PFULLRCO | 0      | Lysosome              |
| sphs1p            | Sphingosine 1-phosphate                                           | Sphing-4-enine 1-phosphate, Sphingosine 1-phosphate                                  | C18H37NO5P         | -1     | Cytosol               |
| sphs1p            | Sphingosine 1-phosphate                                           | Sphing-4-enine 1-phosphate, Sphingosine 1-phosphate                                  | C18H37NO5P         | -1     | Extracellular         |
| sphs1p            | Sphingosine 1-phosphate                                           | Sphing-4-enine 1-phosphate, Sphingosine 1-phosphate                                  | C18H37NO5P         | -1     | Endoplasmic Reticulum |
| spmd              | Spermidine                                                        | N-(3-Aminopropyl)-1,4-butane-diamine                                                 | C7H22N3            | 3      | Cytosol               |
| spmr              | Spermine                                                          | 4-butanediamine, N, N'-Bis(3-aminopropyl)-1                                          | C10H30N4           | 4      | Cytosol               |
| sql               | Squalene                                                          | Spinacene, Supraene                                                                  | C30H50             | 0      | Endoplasmic Reticulum |
| srin              | Serotonin                                                         | 3-(2-Aminoethyl)-1H-indol-5-ol, 5-Hydroxytryptamine, Enteramine                      | C10H13N2O          | 1      | Cytosol               |
| srin              | Serotonin                                                         | 3-(2-Aminoethyl)-1H-indol-5-ol, 5-Hydroxytryptamine, Enteramine                      | C10H13N2O          | 1      | Extracellular         |
| Ssq23epx          | (S)-Squalene-2,3-epoxide                                          | (S)-2, 3-Epoxy-squalene, 3-epoxide, 3-oxide, Squalene 2                              | C30H50O            | 0      | Endoplasmic Reticulum |
| sT_antigen        | sialyl-T antigen                                                  | alpha-N-Acetylneuraminyl-2,3-beta-D-galactosyl-1,3-N-acetyl-alpha-D-galactosaminyl-R | C25H40N2O18X       | -1     | Golgi Apparatus       |
| stcoa             | Stearoyl-CoA (n-C18:0CoA)                                         | Octadecanoyl-CoA, Stearyl-CoA                                                        | C39H66N7O17P3S     | -4     | Cytosol               |
| stcoa             | Stearoyl-CoA (n-C18:0CoA)                                         | Octadecanoyl-CoA, Stearyl-CoA                                                        | C39H66N7O17P3S     | -4     | Mitochondria          |
| stcoa             | Stearoyl-CoA (n-C18:0CoA)                                         | Octadecanoyl-CoA, Stearyl-CoA                                                        | C39H66N7O17P3S     | -4     | Peroxisome            |
| stcrn             | stearoylcarnitine                                                 |                                                                                      | C25H49NO4          | 0      | Cytosol               |
| stcrn             | stearoylcarnitine                                                 |                                                                                      | C25H49NO4          | 0      | Mitochondria          |
| sTn_antigen       | sialyl-Tn antigen                                                 | Glycano-(2,6-alpha-N-acetylneuraminyl)-(N-acetyl-D-galactosaminyl)-glycoprotein      | C19H30N2O13X       | -1     | Golgi Apparatus       |
| strch1            | starch, structure 1 (1,6-[7[1,4-Glc], 4[1,4-Glc]])                |                                                                                      | C66H112O56         | 0      | Extracellular         |
| strch2            | starch, structure 2 (1,6-[2[1,4-Glc], 1,4-Glc]])                  |                                                                                      | C18H32O16          | 0      | Extracellular         |
| strdnc            | stearidonic acid C18:4, n-3                                       | Stearidonic acid, octadeca-6,9,12,15-tetraenoic acid                                 | C18H27O2           | -1     | Cytosol               |
| strdnc            | stearidonic acid C18:4, n-3                                       | Stearidonic acid, octadeca-6,9,12,15-tetraenoic acid                                 | C18H27O2           | -1     | Extracellular         |
| strdncoa          | stearidonyl coenzyme A                                            | stearidonic acid CoA, stearidonic acid coenzyme A                                    | C39H58N7O17P3S     | -4     | Cytosol               |
| strdncoa          | stearidonyl coenzyme A                                            | stearidonic acid CoA, stearidonic acid coenzyme A                                    | C39H58N7O17P3S     | -4     | Mitochondria          |

| Abbreviation | Metabolite Name                                       | Synonyms                                                                                                                                                                   | Formula                         | Charge | Compartment           |
|--------------|-------------------------------------------------------|----------------------------------------------------------------------------------------------------------------------------------------------------------------------------|---------------------------------|--------|-----------------------|
| strdncoa     | stearidonyl coenzyme A                                | stearidonic acid CoA, stearidonic acid coenzyme A                                                                                                                          | C39H58N7O17P3S                  | -4     | Peroxisome            |
| strdnrcm     | stearidonyl carnitine                                 | stearidonic acid carnitine                                                                                                                                                 | C25H41NO4                       | 0      | Cytosol               |
| strdnrcm     | stearidonyl carnitine                                 | stearidonic acid carnitine                                                                                                                                                 | C25H41NO4                       | 0      | Mitochondria          |
| succ         | Succinate                                             | Butanedionic acid, Ethylenesuccinic acid, Succinic acid                                                                                                                    | C4H4O4                          | -2     | Cytosol               |
| succ         | Succinate                                             | Butanedionic acid, Ethylenesuccinic acid, Succinic acid                                                                                                                    | C4H4O4                          | -2     | Extracellular         |
| succ         | Succinate                                             | Butanedionic acid, Ethylenesuccinic acid, Succinic acid                                                                                                                    | C4H4O4                          | -2     | Mitochondria          |
| succ         | Succinate                                             | Butanedionic acid, Ethylenesuccinic acid, Succinic acid                                                                                                                    | C4H4O4                          | -2     | Endoplasmic Reticulum |
| succ         | Succinate                                             | Butanedionic acid, Ethylenesuccinic acid, Succinic acid                                                                                                                    | C4H4O4                          | -2     | Peroxisome            |
| succoa       | Succinyl-CoA                                          | Succinyl coenzyme A, succino-1-yl-coenzymeA                                                                                                                                | C25H35N7O19P3S                  | -5     | Mitochondria          |
| sucr         | Sucrose                                               | 1-alpha-D-glucopyranosyl-2-beta-D-fructofuranoside, Cane sugar, Saccharose, Sugar                                                                                          | C12H22O11                       | 0      | Extracellular         |
| sucsal       | Succinic semialdehyde                                 | 4-Oxobutanoate, Succinate semialdehyde                                                                                                                                     | C4H5O3                          | -1     | Mitochondria          |
| T_antigen    | T antigen (core 1)                                    | Core 1, Glycoprotein D-galactosyl-1,3-N-acetyl-D-galactosamine, beta-D-Galactosyl-1,3-N-acetyl-D-galactosaminyl-R, beta-D-Galactosyl-1,3-N-acetyl-alpha-D-galactosaminyl-R | C14H24NO10X                     | 0      | Golgi Apparatus       |
| t2m26dcoa    | trans-2-Methyl-5-isopropylhexa-2,5-dienoyl-CoA        |                                                                                                                                                                            | C31H46N7O17P3S                  | -4     | Mitochondria          |
| t2m26dcoa    | trans-2-Methyl-5-isopropylhexa-2,5-dienoyl-CoA        |                                                                                                                                                                            | C31H46N7O17P3S                  | -4     | Peroxisome            |
| T4hcinmm     | trans-4-Hydroxycinnamate                              | 4-Coumarate, 4-Hydroxycinnamate, 4-Hydroxycinnamic acid, p-Coumaric acid                                                                                                   | C9H7O3                          | -1     | Cytosol               |
| T4hcinmm     | trans-4-Hydroxycinnamate                              | 4-Coumarate, 4-Hydroxycinnamate, 4-Hydroxycinnamic acid, p-Coumaric acid                                                                                                   | C9H7O3                          | -1     | Mitochondria          |
| tag_hs       | triacylglycerol (homo sapiens)                        |                                                                                                                                                                            | C3H5FULLR2CO2FULLR2CO2FULLR3CO2 | 0      | Cytosol               |
| tag_hs       | triacylglycerol (homo sapiens)                        |                                                                                                                                                                            | C3H5FULLR2CO2FULLR2CO2FULLR3CO2 | 0      | Extracellular         |
| tag1p-D      | D-Tagatose 1-phosphate                                |                                                                                                                                                                            | C6H11O9P                        | -2     | Cytosol               |
| tagat-D      | D-Tagatose                                            | lyxo-Hexulose                                                                                                                                                              | C6H12O6                         | 0      | Cytosol               |
| tagat-D      | D-Tagatose                                            | lyxo-Hexulose                                                                                                                                                              | C6H12O6                         | 0      | Extracellular         |
| taur         | Taurine                                               | 2-Aminoethanesulfonic acid                                                                                                                                                 | C2H7NO3S                        | 0      | Cytosol               |
| taur         | Taurine                                               | 2-Aminoethanesulfonic acid                                                                                                                                                 | C2H7NO3S                        | 0      | Extracellular         |
| taur         | Taurine                                               | 2-Aminoethanesulfonic acid                                                                                                                                                 | C2H7NO3S                        | 0      | Peroxisome            |
| taxol        | paclitaxel                                            | LipoPac, Onxol, Paxceed, TAXOL, Taxol A [MeSH: Paclitaxel], paclitaxel [MeSH: Paclitaxel]                                                                                  | C47H31NO14                      | 0      | Cytosol               |
| taxol        | paclitaxel                                            | LipoPac, Onxol, Paxceed, TAXOL, Taxol A [MeSH: Paclitaxel], paclitaxel [MeSH: Paclitaxel]                                                                                  | C47H31NO14                      | 0      | Extracellular         |
| tchola       | taurocholic acid                                      | 5-beta-cholanic acid-3-alpha-7-alpha-12-alpha-trio-N-(2-sulphoethyl-amide), Cholytaurine, Taurocholate, Taurocholic acid, bile acid                                        | C26H45NO7S                      | 0      | Cytosol               |
| tchola       | taurocholic acid                                      | 5-beta-cholanic acid-3-alpha-7-alpha-12-alpha-trio-N-(2-sulphoethyl-amide), Cholytaurine, Taurocholate, Taurocholic acid, bile acid                                        | C26H45NO7S                      | 0      | Extracellular         |
| tchola       | taurocholic acid                                      | 5-beta-cholanic acid-3-alpha-7-alpha-12-alpha-trio-N-(2-sulphoethyl-amide), Cholytaurine, Taurocholate, Taurocholic acid, bile acid                                        | C26H45NO7S                      | 0      | Peroxisome            |
| tcynt        | Thiocyanate                                           | Thiocyanate, Thiocyanic acid                                                                                                                                               | CNS                             | -1     | Cytosol               |
| tcynt        | Thiocyanate                                           | Thiocyanate, Thiocyanic acid                                                                                                                                               | CNS                             | -1     | Extracellular         |
| tcynt        | Thiocyanate                                           | Thiocyanate, Thiocyanic acid                                                                                                                                               | CNS                             | -1     | Mitochondria          |
| tdchola      | taurochenodeoxycholate                                | Taurochenodeoxycholate, bile acid                                                                                                                                          | C26H45NO6S                      | 0      | Cytosol               |
| tdchola      | taurochenodeoxycholate                                | Taurochenodeoxycholate, bile acid                                                                                                                                          | C26H45NO6S                      | 0      | Extracellular         |
| tdchola      | taurochenodeoxycholate                                | Taurochenodeoxycholate, bile acid                                                                                                                                          | C26H45NO6S                      | 0      | Peroxisome            |
| tdcoa        | Tetradecanoyl-CoA (n-C14:0CoA)                        | Myristoyl-CoA                                                                                                                                                              | C35H58N7O17P3S                  | -4     | Cytosol               |
| tdcoa        | Tetradecanoyl-CoA (n-C14:0CoA)                        | Myristoyl-CoA                                                                                                                                                              | C35H58N7O17P3S                  | -4     | Mitochondria          |
| tdcoa        | Tetradecanoyl-CoA (n-C14:0CoA)                        | Myristoyl-CoA                                                                                                                                                              | C35H58N7O17P3S                  | -4     | Peroxisome            |
| tdACP        | cis-tetradec-7-enoyl-[acyl-carrier protein] (n-C14:1) | Tetradecenoyl-ACP (n-C14:1ACP), cis-myristol-7-enoyl-[acyl-carrier protein] (n-C14:1)                                                                                      | C25H45N2O8PRS                   | -1     | Cytosol               |
| tethex3      | tetracosahexaenoic acid, n-3                          |                                                                                                                                                                            | C24H35O2                        | -1     | Cytosol               |
| tethex3      | tetracosahexaenoic acid, n-3                          |                                                                                                                                                                            | C24H35O2                        | -1     | Extracellular         |
| tethex3coa   | tetracosahexaenoyl coenzyme A                         |                                                                                                                                                                            | C45H66N7O17P3S                  | -4     | Cytosol               |
| tethex3coa   | tetracosahexaenoyl coenzyme A                         |                                                                                                                                                                            | C45H66N7O17P3S                  | -4     | Peroxisome            |
| tetpent3     | tetracosapentaenoic acid, n-3                         |                                                                                                                                                                            | C24H37O2                        | -1     | Cytosol               |
| tetpent3     | tetracosapentaenoic acid, n-3                         |                                                                                                                                                                            | C24H37O2                        | -1     | Extracellular         |
| tetpent3coa  | tetracosapentaenoyl coenzyme A, n-3                   |                                                                                                                                                                            | C45H68N7O17P3S                  | -4     | Cytosol               |
| tetpent3coa  | tetracosapentaenoyl coenzyme A, n-3                   |                                                                                                                                                                            | C45H68N7O17P3S                  | -4     | Mitochondria          |
| tetpent3coa  | tetracosapentaenoyl coenzyme A, n-3                   |                                                                                                                                                                            | C45H68N7O17P3S                  | -4     | Peroxisome            |
| tetpent3crn  | tetracosapentaenoyl carnitine                         |                                                                                                                                                                            | C31H51NO4                       | 0      | Cytosol               |
| tetpent3crn  | tetracosapentaenoyl carnitine                         |                                                                                                                                                                            | C31H51NO4                       | 0      | Mitochondria          |
| tetpent6     | tetracosapentaenoic acid, n-6                         | tetracosapentaenoate, n-6, tetracosapentaenoic acid n-6                                                                                                                    | C24H37O2                        | -1     | Cytosol               |
| tetpent6     | tetracosapentaenoic acid, n-6                         | tetracosapentaenoate, n-6, tetracosapentaenoic acid n-6                                                                                                                    | C24H37O2                        | -1     | Extracellular         |
| tetpent6coa  | tetracosapentaenoyl coenzyme A, n-6                   |                                                                                                                                                                            | C45H68N7O17P3S                  | -4     | Cytosol               |
| tetpent6coa  | tetracosapentaenoyl coenzyme A, n-6                   |                                                                                                                                                                            | C45H68N7O17P3S                  | -4     | Mitochondria          |
| tetpent6coa  | tetracosapentaenoyl coenzyme A, n-6                   |                                                                                                                                                                            | C45H68N7O17P3S                  | -4     | Peroxisome            |

| Abbreviation | Metabolite Name                                        | Synonyms                                                                                                                                                                     | Formula           | Charge | Compartment           |
|--------------|--------------------------------------------------------|------------------------------------------------------------------------------------------------------------------------------------------------------------------------------|-------------------|--------|-----------------------|
| tetpent6crn  | tetracosapentaenoyl carnitine                          |                                                                                                                                                                              | C31H51NO4         | 0      | Cytosol               |
| tetpent6crn  | tetracosapentaenoyl carnitine                          |                                                                                                                                                                              | C31H51NO4         | 0      | Mitochondria          |
| tetet6       | tetracosatetraenoic acid n-6                           |                                                                                                                                                                              | C24H39O2          | -1     | Cytosol               |
| tetet6       | tetracosatetraenoic acid n-6                           |                                                                                                                                                                              | C24H39O2          | -1     | Extracellular         |
| tetet6coa    | tetracosatetraenoyl coenzyme A                         |                                                                                                                                                                              | C45H70N7O17P3S    | -4     | Cytosol               |
| tetet6coa    | tetracosatetraenoyl coenzyme A                         |                                                                                                                                                                              | C45H70N7O17P3S    | -4     | Mitochondria          |
| tetet6coa    | tetracosatetraenoyl coenzyme A                         |                                                                                                                                                                              | C45H70N7O17P3S    | -4     | Peroxisome            |
| tetet6crn    | Tetracosatetraenoyl carnitine                          | tetracosatetraenoic acid carnitine                                                                                                                                           | C31H53NO4         | 0      | Cytosol               |
| tetet6crn    | Tetracosatetraenoyl carnitine                          | tetracosatetraenoic acid carnitine                                                                                                                                           | C31H53NO4         | 0      | Mitochondria          |
| thbpt        | Tetrahydrobiopterin                                    | 2-Amino-6-(1,2-dihydroxypropyl)-5,6,7,8-tetrahydro-4(1H)-pteridinone, 5,6,7,8-Tetrahydrobiopterin, Tetrahydrobiopterin                                                       | C9H15N5O3         | 0      | Cytosol               |
| thbpt        | Tetrahydrobiopterin                                    | 2-Amino-6-(1,2-dihydroxypropyl)-5,6,7,8-tetrahydro-4(1H)-pteridinone, 5,6,7,8-Tetrahydrobiopterin, Tetrahydrobiopterin                                                       | C9H15N5O3         | 0      | Nucleus               |
| thbpt4acam   | Tetrahydrobiopterin-4a-carbinolamine                   |                                                                                                                                                                              | C9H15N5O4         | 0      | Cytosol               |
| thcholoylcoa | 3alpha,7alpha,24-Trihydroxy-5beta-cholestanoyl-CoA     | 3alpha,7alpha,24-Trihydroxy-5beta-cholestanoyl-CoA                                                                                                                           | C48H76N7O20P3S    | -4     | Peroxisome            |
| thcholst     | 3alpha,7alpha,12alpha-Trihydroxy-5beta-cholestan-26-al | 3-alpha-7-alpha-12-alpha-trihydroxy-5-beta-cholestan-26-al                                                                                                                   | C27H46O4          | 0      | Mitochondria          |
| thcholstoic  | 3alpha,7alpha,12alpha-Trihydroxy-5beta-cholestanoate   | 3-alpha-7-alpha-12-alpha-trihydroxy-5-beta-cholestanoic acid, 3alpha,7alpha,12alpha-Trihydroxy-5beta-cholestan-26-oate, 3alpha,7alpha,12alpha-Trihydroxy-5beta-cholestanoate | C27H45O5          | -1     | Mitochondria          |
| thcholstoic  | 3alpha,7alpha,12alpha-Trihydroxy-5beta-cholestanoate   | 3-alpha-7-alpha-12-alpha-trihydroxy-5-beta-cholestanoic acid, 3alpha,7alpha,12alpha-Trihydroxy-5beta-cholestan-26-oate, 3alpha,7alpha,12alpha-Trihydroxy-5beta-cholestanoate | C27H45O5          | -1     | Endoplasmic Reticulum |
| thcholstoic  | 3alpha,7alpha,12alpha-Trihydroxy-5beta-cholestanoate   | 3-alpha-7-alpha-12-alpha-trihydroxy-5-beta-cholestanoic acid, 3alpha,7alpha,12alpha-Trihydroxy-5beta-cholestan-26-oate, 3alpha,7alpha,12alpha-Trihydroxy-5beta-cholestanoate | C27H45O5          | -1     | Peroxisome            |
| thcrm_hs     | trihexoyl ceramide (homo sapiens)                      | Gal(alpha 1->4)-Gal(beta 1->4)-Glc-Cer, Gal-Gal-Glc-Cer, Gal-Gal-Glu-Cer                                                                                                     | C36H66NO17FULLRCO | 0      | Cytosol               |
| thcrm_hs     | trihexoyl ceramide (homo sapiens)                      | Gal(alpha 1->4)-Gal(beta 1->4)-Glc-Cer, Gal-Gal-Glc-Cer, Gal-Gal-Glu-Cer                                                                                                     | C36H66NO17FULLRCO | 0      | Golgi Apparatus       |
| thcys        | Thiocysteine                                           | Thiocysteine                                                                                                                                                                 | C3H7NO2S2         | 0      | Cytosol               |
| thf          | 5,6,7,8-Tetrahydrofolate                               | (6S)-THFA, (6S)-Tetrahydrofolate, (6S)-Tetrahydrofolic acid, THF, Tetrahydrofolate, Tetrahydrofolic acid                                                                     | C19H21N7O6        | -2     | Cytosol               |
| thf          | 5,6,7,8-Tetrahydrofolate                               | (6S)-THFA, (6S)-Tetrahydrofolate, (6S)-Tetrahydrofolic acid, THF, Tetrahydrofolate, Tetrahydrofolic acid                                                                     | C19H21N7O6        | -2     | Extracellular         |
| thf          | 5,6,7,8-Tetrahydrofolate                               | (6S)-THFA, (6S)-Tetrahydrofolate, (6S)-Tetrahydrofolic acid, THF, Tetrahydrofolate, Tetrahydrofolic acid                                                                     | C19H21N7O6        | -2     | Lysosome              |
| thf          | 5,6,7,8-Tetrahydrofolate                               | (6S)-THFA, (6S)-Tetrahydrofolate, (6S)-Tetrahydrofolic acid, THF, Tetrahydrofolate, Tetrahydrofolic acid                                                                     | C19H21N7O6        | -2     | Mitochondria          |
| thm          | Thiamin                                                | Aneurin, Antiberiberi factor, Thiamine, Vitamin B1                                                                                                                           | C12H17N4OS        | 1      | Cytosol               |
| thm          | Thiamin                                                | Aneurin, Antiberiberi factor, Thiamine, Vitamin B1                                                                                                                           | C12H17N4OS        | 1      | Extracellular         |
| thm          | Thiamin                                                | Aneurin, Antiberiberi factor, Thiamine, Vitamin B1                                                                                                                           | C12H17N4OS        | 1      | Mitochondria          |
| thmmp        | Thiamin monophosphate                                  | TMP, Thiamin phosphate, Thiamine monophosphate, Thiamine phosphate                                                                                                           | C12H16N4O4PS      | -1     | Cytosol               |
| thmmp        | Thiamin monophosphate                                  | TMP, Thiamin phosphate, Thiamine monophosphate, Thiamine phosphate                                                                                                           | C12H16N4O4PS      | -1     | Extracellular         |
| thmmp        | Thiamin monophosphate                                  | TMP, Thiamin phosphate, Thiamine monophosphate, Thiamine phosphate                                                                                                           | C12H16N4O4PS      | -1     | Mitochondria          |
| thmpp        | Thiamine diphosphate                                   | TPP, ThPP, Thiamin diphosphate, Thiamin pyrophosphate, cocarboxylase                                                                                                         | C12H16N4O7P2S     | -2     | Cytosol               |
| thmpp        | Thiamine diphosphate                                   | TPP, ThPP, Thiamin diphosphate, Thiamin pyrophosphate, cocarboxylase                                                                                                         | C12H16N4O7P2S     | -2     | Mitochondria          |
| thmtp        | Thiamin triphosphate                                   | Thiamine triphosphate                                                                                                                                                        | C12H16N4O10P3S    | -3     | Cytosol               |
| thmtp        | Thiamin triphosphate                                   | Thiamine triphosphate                                                                                                                                                        | C12H16N4O10P3S    | -3     | Extracellular         |
| thp2c        | 2,3,4,5-Tetrahydropyridine-2-carboxylate               | (R)-2,3,4,5-Tetrahydropyridine-2-carboxylate, delta-6-Piperidine-2-L-carboxylate                                                                                             | C6H8NO2           | -1     | Cytosol               |
| thp2c        | 2,3,4,5-Tetrahydropyridine-2-carboxylate               | (R)-2,3,4,5-Tetrahydropyridine-2-carboxylate, delta-6-Piperidine-2-L-carboxylate                                                                                             | C6H8NO2           | -1     | Peroxisome            |
| thr-L        | L-Threonine                                            | 2-Amino-3-hydroxybutyric acid, Thr                                                                                                                                           | C4H9NO3           | 0      | Cytosol               |
| thr-L        | L-Threonine                                            | 2-Amino-3-hydroxybutyric acid, Thr                                                                                                                                           | C4H9NO3           | 0      | Extracellular         |
| thrt         | L-Threonate                                            | L-Threonate                                                                                                                                                                  | C4H7O5            | -1     | Cytosol               |
| thym         | Thymine                                                | 2,4-Dihydroxy-5-methylpyrimidine, T, Thy                                                                                                                                     | CSH6N2O2          | 0      | Cytosol               |
| thym         | Thymine                                                | 2,4-Dihydroxy-5-methylpyrimidine, T, Thy                                                                                                                                     | CSH6N2O2          | 0      | Extracellular         |
| thymd        | Thymidine                                              | 2'-Deoxythymidine, Deoxythymidine, dT                                                                                                                                        | C10H14N2O5        | 0      | Cytosol               |
| thymd        | Thymidine                                              | 2'-Deoxythymidine, Deoxythymidine, dT                                                                                                                                        | C10H14N2O5        | 0      | Extracellular         |
| thymd        | Thymidine                                              | 2'-Deoxythymidine, Deoxythymidine, dT                                                                                                                                        | C10H14N2O5        | 0      | Lysosome              |
| thymd        | Thymidine                                              | 2'-Deoxythymidine, Deoxythymidine, dT                                                                                                                                        | C10H14N2O5        | 0      | Mitochondria          |

| Abbreviation | Metabolite Name                | Synonyms                                                                                                                                                                                                                                                                      | Formula        | Charge | Compartment           |
|--------------|--------------------------------|-------------------------------------------------------------------------------------------------------------------------------------------------------------------------------------------------------------------------------------------------------------------------------|----------------|--------|-----------------------|
| thyox-L      | L-Thyroxine                    | 3,5,3',5'-Tetraiodo-L-thyronine, O-(4-Hydroxy-3,5-diiodophenyl)-3,5-diiodo-L-tyrosine, T4, Thyroxine, thyroid hormone                                                                                                                                                         | C15H11I4NO4    | 0      | Cytosol               |
| thyox-L      | L-Thyroxine                    | 3,5,3',5'-Tetraiodo-L-thyronine, O-(4-Hydroxy-3,5-diiodophenyl)-3,5-diiodo-L-tyrosine, T4, Thyroxine, thyroid hormone                                                                                                                                                         | C15H11I4NO4    | 0      | Extracellular         |
| tmlys        | N6,N6,N6-Trimethyl-L-lysine    | N6,N6,N6-Trimethyl-L-lysine                                                                                                                                                                                                                                                   | C9H20N2O2      | 0      | Cytosol               |
| tmlys        | N6,N6,N6-Trimethyl-L-lysine    | N6,N6,N6-Trimethyl-L-lysine                                                                                                                                                                                                                                                   | C9H20N2O2      | 0      | Endoplasmic Reticulum |
| tmndnc       | timnodonic acid C20:5, n-3     | (5Z,8Z,11Z,14Z,17Z)-Eicosapentaenoate, 5,8,11,14,17-Eicosapentaenoic acid, (5Z,8Z,11Z,14Z,17Z)-, 5,8,11,14,17-Icosapentaenoic acid, Eicosapentaenoic acid, Icosapentaenoic acid, Icosapento, Icosapentum [INN-Latin], Timnodonic acid, cis-5,8,11,14,17-Eicosapentaenoic acid | C20H29O2       | -1     | Cytosol               |
| tmndnc       | timnodonic acid C20:5, n-3     | (5Z,8Z,11Z,14Z,17Z)-Eicosapentaenoate, 5,8,11,14,17-Eicosapentaenoic acid, (5Z,8Z,11Z,14Z,17Z)-, 5,8,11,14,17-Icosapentaenoic acid, Eicosapentaenoic acid, Icosapentaenoic acid, Icosapento, Icosapentum [INN-Latin], Timnodonic acid, cis-5,8,11,14,17-Eicosapentaenoic acid | C20H29O2       | -1     | Extracellular         |
| tmndncoa     | timnodonyl coenzyme A          |                                                                                                                                                                                                                                                                               | C41H60N7O17P3S | -4     | Cytosol               |
| tmndncoa     | timnodonyl coenzyme A          |                                                                                                                                                                                                                                                                               | C41H60N7O17P3S | -4     | Mitochondria          |
| tmndncoa     | timnodonyl coenzyme A          |                                                                                                                                                                                                                                                                               | C41H60N7O17P3S | -4     | Peroxisome            |
| tmndccrn     | Timnodonyl carnitine           | timnodonic acid carnitine                                                                                                                                                                                                                                                     | C27H43NO4      | 0      | Cytosol               |
| tmndccrn     | Timnodonyl carnitine           | timnodonic acid carnitine                                                                                                                                                                                                                                                     | C27H43NO4      | 0      | Mitochondria          |
| Tn_antigen   | Tn antigen                     | Glycoprotein N-acetyl-D-galactosamine                                                                                                                                                                                                                                         | C8H14NO5X      | 0      | Golgi Apparatus       |
| Tn_antigen   | Tn antigen                     | Glycoprotein N-acetyl-D-galactosamine                                                                                                                                                                                                                                         | C8H14NO5X      | 0      | Lysosome              |
| tolbutamide  | tolbutamide                    | Aglicid, Arkozal, Artosin, Butamide [MeSH: Tolbutamide], Diabetamid, Diabetol [MeSH: Tolbutamide], Diabuton, Diasulfon, Dirastan, tolbutamide [MeSH: Tolbutamide]                                                                                                             | C12H18N2O3S    | 0      | Cytosol               |
| tolbutamide  | tolbutamide                    | Aglicid, Arkozal, Artosin, Butamide [MeSH: Tolbutamide], Diabetamid, Diabetol [MeSH: Tolbutamide], Diabuton, Diasulfon, Dirastan, tolbutamide [MeSH: Tolbutamide]                                                                                                             | C12H18N2O3S    | 0      | Extracellular         |
| trdox        | Oxidized thioredoxin           |                                                                                                                                                                                                                                                                               | X              | 0      | Cytosol               |
| trdox        | Oxidized thioredoxin           |                                                                                                                                                                                                                                                                               | X              | 0      | Mitochondria          |
| trdrd        | Reduced thioredoxin            |                                                                                                                                                                                                                                                                               | XH2            | 0      | Cytosol               |
| trdrd        | Reduced thioredoxin            |                                                                                                                                                                                                                                                                               | XH2            | 0      | Mitochondria          |
| tre          | Trehalose                      | alpha, alpha'-Trehalose; alpha, alpha-Trehalose                                                                                                                                                                                                                               | C12H22O11      | 0      | Cytosol               |
| tre          | Trehalose                      | alpha, alpha'-Trehalose; alpha, alpha-Trehalose                                                                                                                                                                                                                               | C12H22O11      | 0      | Extracellular         |
| triodthy     | Triiodothyronine               | 3,3',5'-Triiodo-L-thyronine, 3,5,3'-L-Triiodo-L-thyronine, 3,5,3'-Triiodothyronine, L-3,5,3'-Triiodothyronine, Liothyronine, T3                                                                                                                                               | C15H12I3NO4    | 0      | Cytosol               |
| triodthy     | Triiodothyronine               | 3,3',5'-Triiodo-L-thyronine, 3,5,3'-L-Triiodo-L-thyronine, 3,5,3'-Triiodothyronine, L-3,5,3'-Triiodothyronine, Liothyronine, T3                                                                                                                                               | C15H12I3NO4    | 0      | Extracellular         |
| triodthsuf   | Triiodothyronine sulfate       | IUPAC Name: 2-amino-3-[3,5-diiodo-4-(3-iodo-4-sulfooxy-phenoxy)-phenyl]-propanoic acid, L-Tyrosine, 3,5-diiodo-O-(3-iodo-4-(sulfooxy)phenyl)-31135-55-4, Triiodothyronine sulfuric ester                                                                                      | C15H11I3NO7S   | -1     | Cytosol               |
| triodthsuf   | Triiodothyronine sulfate       | IUPAC Name: 2-amino-3-[3,5-diiodo-4-(3-iodo-4-sulfooxy-phenoxy)-phenyl]-propanoic acid, L-Tyrosine, 3,5-diiodo-O-(3-iodo-4-(sulfooxy)phenyl)-31135-55-4, Triiodothyronine sulfuric ester                                                                                      | C15H11I3NO7S   | -1     | Extracellular         |
| trp-L        | L-Tryptophan                   | (S)-alpha-amino-beta-(3-indolyl)-propionic acid                                                                                                                                                                                                                               | C11H12N2O2     | 0      | Cytosol               |
| trp-L        | L-Tryptophan                   | (S)-alpha-amino-beta-(3-indolyl)-propionic acid                                                                                                                                                                                                                               | C11H12N2O2     | 0      | Extracellular         |
| trypta       | Tryptamine                     | 3-(2-Aminoethyl)indole                                                                                                                                                                                                                                                        | C10H13N2       | 1      | Cytosol               |
| ts3          | Tachysterol 3                  |                                                                                                                                                                                                                                                                               | C27H44O        | 0      | Cytosol               |
| tssterone    | Testosterone                   | 17beta-Hydroxy-4-androsten-3-one                                                                                                                                                                                                                                              | C19H28O2       | 0      | Cytosol               |
| tssterone    | Testosterone                   | 17beta-Hydroxy-4-androsten-3-one                                                                                                                                                                                                                                              | C19H28O2       | 0      | Endoplasmic Reticulum |
| tssteroneglc | testosterone glucuronide       |                                                                                                                                                                                                                                                                               | C25H36O8       | 0      | Cytosol               |
| tssteroneglc | testosterone glucuronide       |                                                                                                                                                                                                                                                                               | C25H36O8       | 0      | Extracellular         |
| tssteroneglc | testosterone glucuronide       |                                                                                                                                                                                                                                                                               | C25H36O8       | 0      | Endoplasmic Reticulum |
| tssterones   | testosterone sulfate           | 17beta-(Sulfooxy)androst-4-en-3-one, Testosterone-17-sulphate, Testosterone-17-sulfate                                                                                                                                                                                        | C19H27O5S      | -1     | Cytosol               |
| tssterones   | testosterone sulfate           | 17beta-(Sulfooxy)androst-4-en-3-one, Testosterone-17-sulphate, Testosterone-17-sulfate                                                                                                                                                                                        | C19H27O5S      | -1     | Extracellular         |
| tsul         | Thiosulfate                    | Hyposulfite                                                                                                                                                                                                                                                                   | O3S2           | -2     | Cytosol               |
| tsul         | Thiosulfate                    | Hyposulfite                                                                                                                                                                                                                                                                   | O3S2           | -2     | Extracellular         |
| tsul         | Thiosulfate                    | Hyposulfite                                                                                                                                                                                                                                                                   | O3S2           | -2     | Mitochondria          |
| ttcoa        | tetracosanoyl-CoA (n-C24:0CoA) |                                                                                                                                                                                                                                                                               | C45H78N7O17P3S | -4     | Peroxisome            |

| Abbreviation | Metabolite Name                                                   | Synonyms                                                                                                                                                                                                                         | Formula       | Charge | Compartment           |
|--------------|-------------------------------------------------------------------|----------------------------------------------------------------------------------------------------------------------------------------------------------------------------------------------------------------------------------|---------------|--------|-----------------------|
| ttc-ggdp     | trans,trans,cis-Geranylgeranyl diphosphate                        | trans,trans,cis-Geranylgeranyl pyrophosphate                                                                                                                                                                                     | C20H33O7P2    | -3     | Cytosol               |
| ttca         | tetradecanoate (n-C14:0)                                          | 1-tridecanecarboxylic acid; Myristate, Myristic Acid; Myristic acid, Tetradecanoate; crodacid; emery 655; hydrofol acid 1495; hystrene 9014, myristic acid, n-Tetradecanoic Acid, n-tetradecoic acid; neo-fat 14; univol u 3165; | C14H27O2      | -1     | Cytosol               |
| ttca         | tetradecanoate (n-C14:0)                                          | 1-tridecanecarboxylic acid; Myristate, Myristic Acid; Myristic acid, Tetradecanoate; crodacid; emery 655; hydrofol acid 1495; hystrene 9014, myristic acid, n-Tetradecanoic Acid, n-tetradecoic acid; neo-fat 14; univol u 3165; | C14H27O2      | -1     | Extracellular         |
| ttcea        | tetradecenoate (n-C14:1)                                          | tetradecenoic acid                                                                                                                                                                                                               | C14H25O2      | -1     | Cytosol               |
| ttocrn       | tetradecanoyl carnitine                                           | myristic acid carnitine                                                                                                                                                                                                          | C21H41NO4     | 0      | Cytosol               |
| ttocrn       | tetradecanoyl carnitine                                           | myristic acid carnitine                                                                                                                                                                                                          | C21H41NO4     | 0      | Mitochondria          |
| txa2         | Thromboxane A2                                                    | 5S,13-dien-1-oid acid, Sdienoate, (5Z,13E)-(15S)-9alpha,11alpha-Epoxy-15-hydroxythromboxa-5,13, (5Z,9alpha,11alpha,13E,15S)-9,11-Epoxy-15-hydroxythromboxa-, Thromboxane A2                                                      | C20H31O5      | -1     | Cytosol               |
| txa2         | Thromboxane A2                                                    | 5S,13-dien-1-oid acid, Sdienoate, (5Z,13E)-(15S)-9alpha,11alpha-Epoxy-15-hydroxythromboxa-5,13, (5Z,9alpha,11alpha,13E,15S)-9,11-Epoxy-15-hydroxythromboxa-, Thromboxane A2                                                      | C20H31O5      | -1     | Extracellular         |
| txa2         | Thromboxane A2                                                    | 5S,13-dien-1-oid acid, Sdienoate, (5Z,13E)-(15S)-9alpha,11alpha-Epoxy-15-hydroxythromboxa-5,13, (5Z,9alpha,11alpha,13E,15S)-9,11-Epoxy-15-hydroxythromboxa-, Thromboxane A2                                                      | C20H31O5      | -1     | Endoplasmic Reticulum |
| tym          | Tyramine                                                          | 2-(p-Hydroxyphenyl)ethylamine                                                                                                                                                                                                    | C8H12NO       | 1      | Cytosol               |
| tymf         | Tyramine O-sulfate                                                | IUPAC Name: 1-(2-aminoethyl)-4-sulfooxybenzene, Phenol, 4-(2-aminoethyl)-, hydrogen sulfate (ester)                                                                                                                              | C8H11NO4S     | 0      | Cytosol               |
| tymf         | Tyramine O-sulfate                                                | IUPAC Name: 1-(2-aminoethyl)-4-sulfooxybenzene, Phenol, 4-(2-aminoethyl)-, hydrogen sulfate (ester)                                                                                                                              | C8H11NO4S     | 0      | Extracellular         |
| Tyr-ggn      | Tyr-194 of apo-glycogenin protein (primer for glycogen synthesis) |                                                                                                                                                                                                                                  | XOH           | 0      | Cytosol               |
| Tyr-ggn      | Tyr-194 of apo-glycogenin protein (primer for glycogen synthesis) |                                                                                                                                                                                                                                  | XOH           | 0      | Extracellular         |
| tyr-L        | L-Tyrosine                                                        | (S)-2-Amino-3-(p-hydroxyphenyl)propionic acid, (S)-3-(p-Hydroxyphenyl)alanine                                                                                                                                                    | C9H11NO3      | 0      | Cytosol               |
| tyr-L        | L-Tyrosine                                                        | (S)-2-Amino-3-(p-hydroxyphenyl)propionic acid, (S)-3-(p-Hydroxyphenyl)alanine                                                                                                                                                    | C9H11NO3      | 0      | Extracellular         |
| tyr-L        | L-Tyrosine                                                        | (S)-2-Amino-3-(p-hydroxyphenyl)propionic acid, (S)-3-(p-Hydroxyphenyl)alanine                                                                                                                                                    | C9H11NO3      | 0      | Mitochondria          |
| uacgam       | UDP-N-acetyl-D-glucosamine                                        | UDP-GlcNAc, UDP-N-acetylglucosamine, common abbr: UDP-NAcGlc                                                                                                                                                                     | C17H25N3O17P2 | -2     | Cytosol               |
| uacgam       | UDP-N-acetyl-D-glucosamine                                        | UDP-GlcNAc, UDP-N-acetylglucosamine, common abbr: UDP-NAcGlc                                                                                                                                                                     | C17H25N3O17P2 | -2     | Golgi Apparatus       |
| udp          | UDP                                                               | 5'-uridylyate diphosphate, Uridine 5'-diphosphate, uridine diphosphate                                                                                                                                                           | C9H11N2O12P2  | -3     | Cytosol               |
| udp          | UDP                                                               | 5'-uridylyate diphosphate, Uridine 5'-diphosphate, uridine diphosphate                                                                                                                                                           | C9H11N2O12P2  | -3     | Extracellular         |
| udp          | UDP                                                               | 5'-uridylyate diphosphate, Uridine 5'-diphosphate, uridine diphosphate                                                                                                                                                           | C9H11N2O12P2  | -3     | Golgi Apparatus       |
| udp          | UDP                                                               | 5'-uridylyate diphosphate, Uridine 5'-diphosphate, uridine diphosphate                                                                                                                                                           | C9H11N2O12P2  | -3     | Lysosome              |
| udp          | UDP                                                               | 5'-uridylyate diphosphate, Uridine 5'-diphosphate, uridine diphosphate                                                                                                                                                           | C9H11N2O12P2  | -3     | Mitochondria          |
| udp          | UDP                                                               | 5'-uridylyate diphosphate, Uridine 5'-diphosphate, uridine diphosphate                                                                                                                                                           | C9H11N2O12P2  | -3     | Nucleus               |
| udp          | UDP                                                               | 5'-uridylyate diphosphate, Uridine 5'-diphosphate, uridine diphosphate                                                                                                                                                           | C9H11N2O12P2  | -3     | Endoplasmic Reticulum |
| udpacgal     | UDP-N-acetyl-D-galactosamine                                      | UDP-GalNAc                                                                                                                                                                                                                       | C17H25N3O17P2 | -2     | Cytosol               |
| udpacgal     | UDP-N-acetyl-D-galactosamine                                      | UDP-GalNAc                                                                                                                                                                                                                       | C17H25N3O17P2 | -2     | Golgi Apparatus       |
| udpacgal     | UDP-N-acetyl-D-galactosamine                                      | UDP-GalNAc                                                                                                                                                                                                                       | C17H25N3O17P2 | -2     | Lysosome              |
| udpacgal     | UDP-N-acetyl-D-galactosamine                                      | UDP-GalNAc                                                                                                                                                                                                                       | C17H25N3O17P2 | -2     | Endoplasmic Reticulum |
| udpg         | UDPglucose                                                        | UDP-D-glucose                                                                                                                                                                                                                    | C15H22N2O17P2 | -2     | Cytosol               |
| udpg         | UDPglucose                                                        | UDP-D-glucose                                                                                                                                                                                                                    | C15H22N2O17P2 | -2     | Golgi Apparatus       |
| udpg         | UDPglucose                                                        | UDP-D-glucose                                                                                                                                                                                                                    | C15H22N2O17P2 | -2     | Endoplasmic Reticulum |
| udpgal       | UDPgalactose                                                      | UDP-D-galactopyranose, UDP-D-galactose                                                                                                                                                                                           | C15H22N2O17P2 | -2     | Cytosol               |
| udpgal       | UDPgalactose                                                      | UDP-D-galactopyranose, UDP-D-galactose                                                                                                                                                                                           | C15H22N2O17P2 | -2     | Golgi Apparatus       |
| udpglcur     | UDP-D-glucuronate                                                 | UDP-GlcA, UDPglucuronate                                                                                                                                                                                                         | C15H19N2O18P2 | -3     | Cytosol               |
| udpglcur     | UDP-D-glucuronate                                                 | UDP-GlcA, UDPglucuronate                                                                                                                                                                                                         | C15H19N2O18P2 | -3     | Golgi Apparatus       |
| udpglcur     | UDP-D-glucuronate                                                 | UDP-GlcA, UDPglucuronate                                                                                                                                                                                                         | C15H19N2O18P2 | -3     | Endoplasmic Reticulum |
| udpxyl       | UDP-D-xylose                                                      | UDP-alpha-D-xylose, UDPxylose                                                                                                                                                                                                    | C14H20N2O16P2 | -2     | Cytosol               |
| udpxyl       | UDP-D-xylose                                                      | UDP-alpha-D-xylose, UDPxylose                                                                                                                                                                                                    | C14H20N2O16P2 | -2     | Golgi Apparatus       |
| udpxyl       | UDP-D-xylose                                                      | UDP-alpha-D-xylose, UDPxylose                                                                                                                                                                                                    | C14H20N2O16P2 | -2     | Endoplasmic Reticulum |

| Abbreviation | Metabolite Name                        | Synonyms                                                                         | Formula        | Charge | Compartment           |
|--------------|----------------------------------------|----------------------------------------------------------------------------------|----------------|--------|-----------------------|
| ump          | UMP                                    | 5Uridylic acid, Uridine 5'-monophosphate, Uridine monophosphate, Uridylic acid   | C9H11N2O9P     | -2     | Cytosol               |
| ump          | UMP                                    | 5Uridylic acid, Uridine 5'-monophosphate, Uridine monophosphate, Uridylic acid   | C9H11N2O9P     | -2     | Extracellular         |
| ump          | UMP                                    | 5Uridylic acid, Uridine 5'-monophosphate, Uridine monophosphate, Uridylic acid   | C9H11N2O9P     | -2     | Golgi Apparatus       |
| ump          | UMP                                    | 5Uridylic acid, Uridine 5'-monophosphate, Uridine monophosphate, Uridylic acid   | C9H11N2O9P     | -2     | Lysosome              |
| ump          | UMP                                    | 5Uridylic acid, Uridine 5'-monophosphate, Uridine monophosphate, Uridylic acid   | C9H11N2O9P     | -2     | Mitochondria          |
| ump          | UMP                                    | 5Uridylic acid, Uridine 5'-monophosphate, Uridine monophosphate, Uridylic acid   | C9H11N2O9P     | -2     | Nucleus               |
| ump          | UMP                                    | 5Uridylic acid, Uridine 5'-monophosphate, Uridine monophosphate, Uridylic acid   | C9H11N2O9P     | -2     | Endoplasmic Reticulum |
| uppg3        | Uroporphyrinogen III                   |                                                                                  | C40H36N4O16    | -8     | Cytosol               |
| ura          | Uracil                                 | 2,4-(1H,3H)-Pyrimidinedione, 2,4-Dihydropyrimidine, 2,4-dioxypyrimidine, U       | C4H4N2O2       | 0      | Cytosol               |
| ura          | Uracil                                 | 2,4-(1H,3H)-Pyrimidinedione, 2,4-Dihydropyrimidine, 2,4-dioxypyrimidine, U       | C4H4N2O2       | 0      | Extracellular         |
| urate        | Urate                                  | 2,6,8-trioxypurine, 8-Hydroxyxanthine, Lithic acid Uric acid, Uric oxide         | C5H4N4O3       | 0      | Cytosol               |
| urate        | Urate                                  | 2,6,8-trioxypurine, 8-Hydroxyxanthine, Lithic acid Uric acid, Uric oxide         | C5H4N4O3       | 0      | Extracellular         |
| urate        | Urate                                  | 2,6,8-trioxypurine, 8-Hydroxyxanthine, Lithic acid Uric acid, Uric oxide         | C5H4N4O3       | 0      | Peroxisome            |
| urcan        | Urocanate                              | 2-Propenoic acid, 4-Imidazoleacrylic acid, Urocanic acid                         | C6H5N2O2       | -1     | Cytosol               |
| urea         | Urea                                   | Carbamide, Carbamimidic acid, Carbonyl diamine, Isourea, aquadrate               | CH4N2O         | 0      | Cytosol               |
| urea         | Urea                                   | Carbamide, Carbamimidic acid, Carbonyl diamine, Isourea, aquadrate               | CH4N2O         | 0      | Extracellular         |
| urea         | Urea                                   | Carbamide, Carbamimidic acid, Carbonyl diamine, Isourea, aquadrate               | CH4N2O         | 0      | Mitochondria          |
| uri          | Uridine                                |                                                                                  | C9H12N2O6      | 0      | Cytosol               |
| uri          | Uridine                                |                                                                                  | C9H12N2O6      | 0      | Extracellular         |
| uri          | Uridine                                |                                                                                  | C9H12N2O6      | 0      | Lysosome              |
| uri          | Uridine                                |                                                                                  | C9H12N2O6      | 0      | Mitochondria          |
| uri          | Uridine                                |                                                                                  | C9H12N2O6      | 0      | Nucleus               |
| utp          | UTP                                    | 5'-uridylylate triphosphate, Uridine 5'-triphosphate, Uridine triphosphate, rUTP | C9H11N2O15P3   | -4     | Cytosol               |
| utp          | UTP                                    | 5'-uridylylate triphosphate, Uridine 5'-triphosphate, Uridine triphosphate, rUTP | C9H11N2O15P3   | -4     | Extracellular         |
| utp          | UTP                                    | 5'-uridylylate triphosphate, Uridine 5'-triphosphate, Uridine triphosphate, rUTP | C9H11N2O15P3   | -4     | Mitochondria          |
| utp          | UTP                                    | 5'-uridylylate triphosphate, Uridine 5'-triphosphate, Uridine triphosphate, rUTP | C9H11N2O15P3   | -4     | Nucleus               |
| vacc         | vaccenic acid                          | (E)-Octadec-11-enoic acid, 11-Octadecenoic acid, (E)-, 11-octadecenoic acid      | C18H33O2       | -1     | Cytosol               |
| vacc         | vaccenic acid                          | (E)-Octadec-11-enoic acid, 11-Octadecenoic acid, (E)-, 11-octadecenoic acid      | C18H33O2       | -1     | Extracellular         |
| vaccoa       | vaccenyl coenzyme A                    | vaccenyl CoA                                                                     | C39H64N7O17P3S | -4     | Cytosol               |
| vaccoa       | vaccenyl coenzyme A                    | vaccenyl CoA                                                                     | C39H64N7O17P3S | -4     | Mitochondria          |
| vacccm       | Vaccenyl carnitine                     |                                                                                  | C25H47NO4      | 0      | Cytosol               |
| vacccm       | Vaccenyl carnitine                     |                                                                                  | C25H47NO4      | 0      | Mitochondria          |
| val-L        | L-Valine                               | 2-Amino-3-methylbutyric acid, 2-Aminoisovaleric acid, Val                        | C5H11NO2       | 0      | Cytosol               |
| val-L        | L-Valine                               | 2-Amino-3-methylbutyric acid, 2-Aminoisovaleric acid, Val                        | C5H11NO2       | 0      | Extracellular         |
| val-L        | L-Valine                               | 2-Amino-3-methylbutyric acid, 2-Aminoisovaleric acid, Val                        | C5H11NO2       | 0      | Mitochondria          |
| vitd2        | Vitamin D2                             | Calciferol (TN); Drisdol (TN), Ergocalciferol;                                   | C28H44O        | 0      | Cytosol               |
| vitd2        | Vitamin D2                             | Calciferol (TN); Drisdol (TN), Ergocalciferol;                                   | C28H44O        | 0      | Extracellular         |
| vitd2        | Vitamin D2                             | Calciferol (TN); Drisdol (TN), Ergocalciferol;                                   | C28H44O        | 0      | Mitochondria          |
| vitd3        | Vitamin D3                             |                                                                                  | C27H44O        | 0      | Cytosol               |
| vitd3        | Vitamin D3                             |                                                                                  | C27H44O        | 0      | Extracellular         |
| vitd3        | Vitamin D3                             |                                                                                  | C27H44O        | 0      | Mitochondria          |
| wharachd     | w-hydroxyl arachidonic acid            | omega hydroxylated arachidonic acid                                              | C20H31O3       | -1     | Endoplasmic Reticulum |
| whddca       | omega hydroxy dodecanoate (n-C12:0)    | omega hydroxy lauric acid                                                        | C12H23O3       | -1     | Cytosol               |
| whddca       | omega hydroxy dodecanoate (n-C12:0)    | omega hydroxy lauric acid                                                        | C12H23O3       | -1     | Extracellular         |
| whhdca       | omega hydroxy hexadecanoate (n-C16:0)  | omega hydroxy palmitic acid                                                      | C16H31O3       | -1     | Cytosol               |
| whhdca       | omega hydroxy hexadecanoate (n-C16:0)  | omega hydroxy palmitic acid                                                      | C16H31O3       | -1     | Extracellular         |
| whststerone  | w hydroxy testosterone                 | omega hydroxy testosterone                                                       | C19H28O3       | 0      | Cytosol               |
| whststerone  | w hydroxy testosterone                 | omega hydroxy testosterone                                                       | C19H28O3       | 0      | Extracellular         |
| whststerone  | w hydroxy testosterone                 | omega hydroxy testosterone                                                       | C19H28O3       | 0      | Endoplasmic Reticulum |
| whtdca       | omega hydroxy tetradecanoate (n-C14:0) | omega hydroxy myristic acid                                                      | C14H27O3       | -1     | Cytosol               |



| Abbreviation | Metabolite Name                                        | Synonyms                                                                                                                                            | Formula         | Charge | Compartment           |
|--------------|--------------------------------------------------------|-----------------------------------------------------------------------------------------------------------------------------------------------------|-----------------|--------|-----------------------|
| whttca       | omega hydroxy tetradecanoate (n-C14:0)                 | omega hydroxy myristic acid                                                                                                                         | C14H27O3        | -1     | Extracellular         |
| xan          | Xanthine                                               | 2,6-Dioxopurine                                                                                                                                     | C5H4N4O2        | 0      | Cytosol               |
| xan          | Xanthine                                               | 2,6-Dioxopurine                                                                                                                                     | C5H4N4O2        | 0      | Peroxisome            |
| xmp          | Xanthosine 5'-phosphate                                | (9-D-Ribosylxanthine)-5'-phosphate, XMP, Xanthylic acid                                                                                             | C10H11N4O9P     | -2     | Cytosol               |
| xol24oh      | 24-Hydroxycholesterol                                  | Cerebrosterol, Cholest-5-ene-3,24-diol, Cholest-5-ene-3,24-diol, (3beta,24S)-                                                                       | C27H46O2        | 0      | Endoplasmic Reticulum |
| xol25oh      | 25-Hydroxycholesterol                                  | 5-Cholestene-3beta,25-diol, Cholest-5-ene-3beta,25-diol                                                                                             | C27H46O2        | 0      | Endoplasmic Reticulum |
| xol27oh      | 27-Hydroxycholesterol                                  | 27-Hydroxycholesterol, 5-Cholesten-3beta,27-diol                                                                                                    | C27H46O2        | 0      | Mitochondria          |
| xol27oh      | 27-Hydroxycholesterol                                  | 27-Hydroxycholesterol, 5-Cholesten-3beta,27-diol                                                                                                    | C27H46O2        | 0      | Endoplasmic Reticulum |
| xol7a        | 7 alpha-Hydroxycholesterol                             | 7alpha-Hydroxycholesterol, Cholest-5-ene-3beta,7alpha-diol                                                                                          | C27H46O2        | 0      | Endoplasmic Reticulum |
| xol7ah       | 7alpha-Hydroxy-5beta-cholestan-3-one                   | 5-beta-cholestan-7-alpha-ol-3-one                                                                                                                   | C27H46O2        | 0      | Cytosol               |
| xol7ah2      | 3alpha,7alpha-Dihydroxy-5beta-cholestane               | 3alpha,7alpha-Dihydroxy-5beta-cholestane, 5-beta-cholestan-3-alpha-7-alpha-diol, 5beta-cholestane-3alpha,7alpha-diol                                | C27H48O2        | 0      | Cytosol               |
| xol7ah2      | 3alpha,7alpha-Dihydroxy-5beta-cholestane               | 3alpha,7alpha-Dihydroxy-5beta-cholestane, 5-beta-cholestan-3-alpha-7-alpha-diol, 5beta-cholestane-3alpha,7alpha-diol                                | C27H48O2        | 0      | Mitochondria          |
| xol7ah2      | 3alpha,7alpha-Dihydroxy-5beta-cholestane               | 3alpha,7alpha-Dihydroxy-5beta-cholestane, 5-beta-cholestan-3-alpha-7-alpha-diol, 5beta-cholestane-3alpha,7alpha-diol                                | C27H48O2        | 0      | Endoplasmic Reticulum |
| xol7ah2al    | 3alpha,7alpha-Dihydroxy-5beta-cholestan-26-al          | 3alpha,7alpha-Dihydroxy-5beta-cholestan-26-al                                                                                                       | C27H46O3        | 0      | Mitochondria          |
| xol7ah3      | 3alpha,7alpha,26-Trihydroxy-5beta-cholestane           | 3alpha,7alpha,26-Trihydroxy-5beta-cholestane, 5beta-Cholestane-3alpha,7alpha,26-triol                                                               | C27H48O3        | 0      | Mitochondria          |
| xol7aone     | 7alpha-Hydroxycholest-4-en-3-one                       | 4-cholesten-7-alpha-ol-3-one                                                                                                                        | C27H44O2        | 0      | Cytosol               |
| xol7aone     | 7alpha-Hydroxycholest-4-en-3-one                       | 4-cholesten-7-alpha-ol-3-one                                                                                                                        | C27H44O2        | 0      | Endoplasmic Reticulum |
| xoldiolone   | 7alpha,12alpha-Dihydroxycholest-4-en-3-one             | 4-cholestan-7-alpha-12-alpha-diol-3-one, 7alpha,12alpha-Dihydroxycholest-4-en-3-one                                                                 | C27H44O3        | 0      | Cytosol               |
| xoldiolone   | 7alpha,12alpha-Dihydroxycholest-4-en-3-one             | 4-cholestan-7-alpha-12-alpha-diol-3-one, 7alpha,12alpha-Dihydroxycholest-4-en-3-one                                                                 | C27H44O3        | 0      | Mitochondria          |
| xoldiolone   | 7alpha,12alpha-Dihydroxycholest-4-en-3-one             | 4-cholestan-7-alpha-12-alpha-diol-3-one, 7alpha,12alpha-Dihydroxycholest-4-en-3-one                                                                 | C27H44O3        | 0      | Endoplasmic Reticulum |
| xoldioloneh  | 7alpha,12alpha-Dihydroxy-5beta-cholestan-3-one         | 5-beta-cholestan-7-alpha-12-alpha-3-one, 7alpha,12alpha-Dihydroxy-5beta-cholestan-3-one                                                             | C27H46O3        | 0      | Cytosol               |
| xolest_hs    | cholesterol ester                                      | Cholesterol ester                                                                                                                                   | C27H45XCO2      | 0      | Cytosol               |
| xolest_hs    | cholesterol ester                                      | Cholesterol ester                                                                                                                                   | C27H45XCO2      | 0      | Extracellular         |
| xolest_hs    | cholesterol ester                                      | Cholesterol ester                                                                                                                                   | C27H45XCO2      | 0      | Endoplasmic Reticulum |
| xolest2_hs   | cholesterol ester (from FULLR2)                        |                                                                                                                                                     | C27H45FULLR2CO2 | 0      | Cytosol               |
| xolest2_hs   | cholesterol ester (from FULLR2)                        |                                                                                                                                                     | C27H45FULLR2CO2 | 0      | Extracellular         |
| xolletrol    | 3alpha,7alpha,12alpha,26-Tetrahydroxy-5beta-cholestane |                                                                                                                                                     | C27H48O4        | 0      | Mitochondria          |
| xoltri24     | 7-alpha,24(S)-Dihydroxycholesterol                     | 5-Cholesten-3-beta, 7 alpha, 24(S)-triol                                                                                                            | C27H46O3        | 0      | Cytosol               |
| xoltri24     | 7-alpha,24(S)-Dihydroxycholesterol                     | 5-Cholesten-3-beta, 7 alpha, 24(S)-triol                                                                                                            | C27H46O3        | 0      | Extracellular         |
| xoltri24     | 7-alpha,24(S)-Dihydroxycholesterol                     | 5-Cholesten-3-beta, 7 alpha, 24(S)-triol                                                                                                            | C27H46O3        | 0      | Endoplasmic Reticulum |
| xoltri25     | 7-alpha,25-Dihydroxycholesterol                        | 5-Cholesten-3-beta, 7 alpha, 25-triol                                                                                                               | C27H46O3        | 0      | Cytosol               |
| xoltri25     | 7-alpha,25-Dihydroxycholesterol                        | 5-Cholesten-3-beta, 7 alpha, 25-triol                                                                                                               | C27H46O3        | 0      | Extracellular         |
| xoltri25     | 7-alpha,25-Dihydroxycholesterol                        | 5-Cholesten-3-beta, 7 alpha, 25-triol                                                                                                               | C27H46O3        | 0      | Endoplasmic Reticulum |
| xoltri27     | 7-alpha,27-Dihydroxycholesterol                        | 5-Cholesten-3-beta, 7 alpha, 27-triol                                                                                                               | C27H46O3        | 0      | Cytosol               |
| xoltri27     | 7-alpha,27-Dihydroxycholesterol                        | 5-Cholesten-3-beta, 7 alpha, 27-triol                                                                                                               | C27H46O3        | 0      | Extracellular         |
| xoltri27     | 7-alpha,27-Dihydroxycholesterol                        | 5-Cholesten-3-beta, 7 alpha, 27-triol                                                                                                               | C27H46O3        | 0      | Endoplasmic Reticulum |
| xoltriol     | 3alpha,7alpha,12alpha-Trihydroxy-5beta-cholestane      | 3alpha,7alpha,12alpha-Trihydroxy-5beta-cholestane, 5-beta-cholestan-3-alpha-7-alpha-12-alpha-triol                                                  | C27H48O3        | 0      | Cytosol               |
| xoltriol     | 3alpha,7alpha,12alpha-Trihydroxy-5beta-cholestane      | 3alpha,7alpha,12alpha-Trihydroxy-5beta-cholestane, 5-beta-cholestan-3-alpha-7-alpha-12-alpha-triol                                                  | C27H48O3        | 0      | Mitochondria          |
| xoltriol     | 3alpha,7alpha,12alpha-Trihydroxy-5beta-cholestane      | 3alpha,7alpha,12alpha-Trihydroxy-5beta-cholestane, 5-beta-cholestan-3-alpha-7-alpha-12-alpha-triol                                                  | C27H48O3        | 0      | Endoplasmic Reticulum |
| xser         | Xyl-L-Ser (protein)                                    |                                                                                                                                                     | C5H9O4X         | 0      | Golgi Apparatus       |
| xser         | Xyl-L-Ser (protein)                                    |                                                                                                                                                     | C5H9O4X         | 0      | Endoplasmic Reticulum |
| xtp          | XTP                                                    |                                                                                                                                                     | C10H11N4O15P3   | -4     | Cytosol               |
| xtsn         | Xanthosine                                             |                                                                                                                                                     | C10H12N4O6      | 0      | Cytosol               |
| xu1p-D       | D-Xylulose 1-phosphate                                 |                                                                                                                                                     | C5H9O8P         | -2     | Cytosol               |
| xu5p-D       | D-Xylulose 5-phosphate                                 |                                                                                                                                                     | C5H9O8P         | -2     | Cytosol               |
| xyl-D        | D-Xylose                                               | Wood sugar                                                                                                                                          | C5H10O5         | 0      | Cytosol               |
| xyl-D        | D-Xylose                                               | Wood sugar                                                                                                                                          | C5H10O5         | 0      | Extracellular         |
| xyl-D        | D-Xylose                                               | Wood sugar                                                                                                                                          | C5H10O5         | 0      | Lysosome              |
| xylnt        | L-Xylonate                                             | L-xylonic acid                                                                                                                                      | C5H9O6          | -1     | Cytosol               |
| xylt         | Xylitol                                                |                                                                                                                                                     | C5H12O5         | 0      | Cytosol               |
| xylt         | Xylitol                                                |                                                                                                                                                     | C5H12O5         | 0      | Extracellular         |
| xylu-D       | D-Xylulose                                             | D-L-xylulose, D-threo-Pentulose                                                                                                                     | C5H10O5         | 0      | Cytosol               |
| xylu-L       | L-Xylulose                                             | L-Lyxulose, L-threo-Pentulose                                                                                                                       | C5H10O5         | 0      | Cytosol               |
| yyite        | gamma-Tocopherol                                       | 7,8-Dimethyltocol, 7,8-Dimethyltocolo-xylotocopherol, CCRIS 3610, CCRIS 4506, E-MD 80, Methyltolcols, TOCOPHEROL, gamma-Tokoferol, o-Xylotocopherol | C28H48O2        | 0      | Cytosol               |

| Abbreviation | Metabolite Name           | Synonyms                                                                                                                                                     | Formula  | Charge | Compartment           |
|--------------|---------------------------|--------------------------------------------------------------------------------------------------------------------------------------------------------------|----------|--------|-----------------------|
| yyite        | gamma-Tocopherol          | 7,8-Dimethyltocol, 7,8-Dimethyltolocol, 7,8-Dimethyltolocol, CCRIS 3610, CCRIS 4506, E-MIX 80, Methyltolocols, TOCOPHEROL, gamma-Tokoferol, o-Xylotocopherol | C28H48O2 | 0      | Extracellular         |
| zym_int2     | zymosterol intermediate 2 |                                                                                                                                                              | C27H42O  | 0      | Endoplasmic Reticulum |
| zymst        | zymosterol                | delta8,24-Cholestadien-3beta-ol                                                                                                                              | C27H44O  | 0      | Endoplasmic Reticulum |
| zymstnl      | Zymostenol                | 5alpha-Cholest-8-en-3beta-ol, Cholestenol, Lathosterol, Zymostenol                                                                                           | C27H46O  | 0      | Endoplasmic Reticulum |
