# Supplementary material
Source: PubMed Central journal article supplement (PMC1794290)
Supplement: pnas_0610772104_13.pdf [file pnas_0610772104_13.pdf]

**Table 8: *H. sapiens* Recon 1 metabolic genes.** List of the 1,496 genes included in the network. Each locus may encode more than one transcript, which is denoted by the suffix “.1”, “.2”, etc., after the locus number (Entrez Gene ID). Database abbreviations in additional notes field: HUGO – Human Genome Organization, MGD – Mouse Genome Database, MGI – Mouse Genome Index.

| Abbreviation | Entrez Gene ID | Gene Symbol | Putative Function                                                                                 | Additional notes                                                                                                                                      |
|--------------|----------------|-------------|---------------------------------------------------------------------------------------------------|-------------------------------------------------------------------------------------------------------------------------------------------------------|
| 3162.1       | 3162           | HMOX1       | heme oxygenase (decycling) 1                                                                      | Aliases: bK286B10, HO-1/HUGO ID: 5013/UniProt ID: P09601/                                                                                             |
| 4514.1       | 4514           | MTCO3       | cytochrome c oxidase III                                                                          | HUGO ID: 7422/UniProt ID: P00414/                                                                                                                     |
| 3421.1       | 3421           | IDH3G       | isocitrate dehydrogenase 3 (NAD+) gamma                                                           | HUGO ID: 5386/UniProt ID: P51553/                                                                                                                     |
| 5033.1       | 5033           | P4HA1       | procollagen-proline, 2-oxoglutarate 4-dioxygenase (proline 4-hydroxylase), alpha polypeptide I    | HUGO ID: 8546/UniProt ID: P13674/                                                                                                                     |
| 4907.1       | 4907           | NT5E        | 5'-nucleotidase, ecto (CD73)                                                                      | Aliases: CD73, eN, eNT/HUGO ID: 8021/UniProt ID: P21589/                                                                                              |
| 5106.1       | 5106           | PCK2        | phosphoenolpyruvate carboxykinase 2 (mitochondrial)                                               | Aliases: PEPCK/HUGO ID: 8725/UniProt ID: Q16822/                                                                                                      |
| 212.1        | 212            | ALAS2       | aminolevulinatase, delta-, synthase 2 (sideroblastic/hypochromic anemia)                          | HUGO ID: 397/UniProt ID: P22557/                                                                                                                      |
| 9446.1       | 9446           | GSTTLp28    | glutathione-S-transferase like; glutathione transferase omega                                     |                                                                                                                                                       |
| 51478.1      | 51478          | HSD17B7     | hydroxysteroid (17-beta) dehydrogenase 7                                                          |                                                                                                                                                       |
| 875.1        | 875            | CBS         | cystathionine-beta-synthase                                                                       | Aliases: HIP4/HUGO ID: 1550/UniProt ID: P35520/                                                                                                       |
| 7086.1       | 7086           | TKT         | transketolase (Wernicke-Korsakoff syndrome)                                                       | HUGO ID: 11834/UniProt ID: P29401/                                                                                                                    |
| 6472.1       | 6472           | SHMT2       | serine hydroxymethyltransferase 2 (mitochondrial)                                                 | HUGO ID: 10852/UniProt ID: P34897/                                                                                                                    |
| 3036.1       | 3036           | HAS1        | hyaluronan synthase 1                                                                             | HUGO ID: 4818/UniProt ID: Q92839/                                                                                                                     |
| 3990.1       | 3990           | LIPC        | lipase, hepatic                                                                                   | HUGO ID: 6619/UniProt ID: P11150/                                                                                                                     |
| 2731.1       | 2731           | GLDC        | glycine dehydrogenase (decarboxylating; glycine decarboxylase, glycine cleavage system protein P) |                                                                                                                                                       |
| 3615.1       | 3615           | IMPDH2      | IMP (inosine monophosphate) dehydrogenase 2                                                       |                                                                                                                                                       |
| 130.1        | 130            | ADH6        | alcohol dehydrogenase 6 (class V)                                                                 | Locus type: gene with protein product, function known or inferred/Aliases: ADH-5/HUGO ID: 255/UniProt ID: P28332/                                     |
| 9957.1       | 9957           | HS3ST1      | heparan sulfate (glucosamine) 3-O-sulfotransferase 1                                              | Locus type: gene with protein product, function known or inferred/Aliases: 3OST1/HUGO ID: 5194/UniProt ID: O14792/                                    |
| 39.1         | 39             | ACAT2       | acetyl-Coenzyme A acetyltransferase 2 (acetoacetyl Coenzyme A thiolase)                           | HUGO ID: 94/UniProt ID: Q16146/                                                                                                                       |
| 9488.1       | 9488           | PIGB        | phosphatidylinositol glycan, class B                                                              | HUGO ID: 8959/UniProt ID: Q8WVW7/                                                                                                                     |
| 7841.1       | 7841           | GCSI        | glucosidase I                                                                                     | transcript: NM_006302                                                                                                                                 |
| 112.1        | 112            | ADCY6       | adenylate cyclase 6                                                                               | HUGO ID: 237/UniProt ID: O43306/                                                                                                                      |
| 7054.1       | 7054           | TH          | tyrosine hydroxylase                                                                              | HUGO ID: 11782/UniProt ID: P07101/                                                                                                                    |
| 3037.1       | 3037           | HAS2        | hyaluronan synthase 2                                                                             | Locus type: gene with protein product, function known or inferred/HUGO ID: 4819/UniProt ID: Q92819/                                                   |
| 3293.1       | 3293           | HSD17B3     | hydroxysteroid (17-beta) dehydrogenase 3                                                          | HUGO ID: 5212/UniProt ID: P37058/                                                                                                                     |
| 1371.1       | 1371           | CPOX        | coproporphyrinogen oxidase (coproporphyrin, harderoporphyria)                                     |                                                                                                                                                       |
| 4126.1       | 4126           | MANBA       | mannosidase, beta A, lysosomal                                                                    | HUGO ID: 6831/UniProt ID: O00462/                                                                                                                     |
| 8867.1       | 8867           | SYNJ1       | synaptotagmin 1                                                                                   | transcript: NM_003895                                                                                                                                 |
| 7357.1       | 7357           | UGCG        | UDP-glucose ceramide glucosyltransferase                                                          |                                                                                                                                                       |
| 1585.1       | 1585           | CYP11B2     | cytochrome P450, family 11, subfamily B, polypeptide 2                                            | Locus type: gene with protein product, function known or inferred/Aliases: CYP11BL, CPN2, P-450C18, P450aldo, ALDOS/HUGO ID: 2592/UniProt ID: P19099/ |
| 5959.1       | 5959           | RDH5        | retinol dehydrogenase 5 (11-cis and 9-cis)                                                        |                                                                                                                                                       |
| 8693.1       | 8693           | GALNT4      | UDP-N-acetyl-alpha-D-galactosamine:polypeptide N-acetylgalactosaminyltransferase 4 (GalNAc-T4)    | Locus type: gene with protein product, function known or inferred/Aliases: GalNAc-T4/HUGO ID: 4126/UniProt ID: O00208/                                |
| 1606.1       | 1606           | DGKA        | diacylglycerol kinase, alpha 80kDa                                                                | *PubMed                                                                                                                                               |
| 2519.1       | 2519           | FUCA2       | fucosidase, alpha-L- 2, plasma                                                                    | Locus type: gene with protein product, function known or inferred/Aliases: MGC1314, dI20N2.5/HUGO ID: 4008/UniProt ID: Q9BTY2/                        |
| 23439.1      | 23439          | ATP1B4      | ATPase, (Na+)/K+ transporting, beta 4 polypeptide                                                 | HUGO ID: 808/UniProt ID: Q9UN42/                                                                                                                      |
| 4694.1       | 4694           | NDUFA1      | NADH dehydrogenase (ubiquinone) 1 alpha subcomplex, 1, 7.5kDa                                     | Locus type: gene with protein product, function known or inferred/Aliases: MWFE, C1-MWFE/HUGO ID: 7683/UniProt ID: O15239/                            |
| 3614.1       | 3614           | IMPDH1      | IMP (inosine monophosphate) dehydrogenase 1                                                       | Aliases: sWSS2608/HUGO ID: 6052/UniProt ID: P20839/                                                                                                   |
| 4712.1       | 4712           | NDUFB6      | NADH dehydrogenase (ubiquinone) 1 beta subcomplex, 6, 17kDa                                       |                                                                                                                                                       |
| 100.1        | 100            | ADA         | adenosine deaminase                                                                               |                                                                                                                                                       |
| 223.1        | 223            | ALDH9A1     | aldehyde dehydrogenase 9 family, member A1                                                        |                                                                                                                                                       |
| 3423.1       | 3423           | IDS         | iduronate 2-sulfatase (Hunter syndrome)                                                           | HUGO ID: 5389/UniProt ID: P22304/                                                                                                                     |
| 1553.1       | 1553           | CYP2A13     | cytochrome P450, family 2, subfamily A, polypeptide 13                                            |                                                                                                                                                       |
| 1892.1       | 1892           | ECHS1       | enoyl Coenzyme A hydratase, short chain, 1, mitochondrial                                         | Aliases: SCEH/HUGO ID: 3151/UniProt ID: P30084/                                                                                                       |
| 2984.1       | 2984           | GUCY2C      | guanylate cyclase 2C (heat stable enterotoxin receptor)                                           | Aliases: STAR/HUGO ID: 4688/UniProt ID: P25092/                                                                                                       |
| 4047.1       | 4047           | LSS         | lanosterol synthase (2,3-oxidosqualene-lanosterol cyclase)                                        |                                                                                                                                                       |
| 2977.1       | 2977           | GUCY1A2     | guanylate cyclase 1, soluble, alpha 2                                                             | Aliases: GC-SA2/HUGO ID: 4684/UniProt ID: P33402/                                                                                                     |
| 5049.1       | 5049           | PAFAH1B2    | platelet-activating factor acetylhydrolase, isoform Ib, beta subunit 30kDa                        |                                                                                                                                                       |
| 10007.1      | 10007          | GNPI        | glucosamine-6-phosphate isomerase                                                                 |                                                                                                                                                       |
| 4513.1       | 4513           | MTCO2       | cytochrome c oxidase II                                                                           |                                                                                                                                                       |
| 5305.1       | 5305           | PIP5K2A     | phosphatidylinositol-4-phosphate 5-kinase, type II, alpha                                         | HUGO ID: 8997/UniProt ID: P48426/                                                                                                                     |
| 4759.1       | 4759           | NEU2        | sialidase 2 (cytosolic sialidase)                                                                 | HUGO ID: 7759/UniProt ID: Q9Y3R4/                                                                                                                     |
| 3242.1       | 3242           | HPD         | 4-hydroxyphenylpyruvate dioxygenase                                                               | HUGO ID: 5147/UniProt ID: P32754/                                                                                                                     |

| Abbreviation | Entrez Gene ID | Gene Symbol | Putative Function                                                                                    | Additional notes                                                                                                                |
|--------------|----------------|-------------|------------------------------------------------------------------------------------------------------|---------------------------------------------------------------------------------------------------------------------------------|
| 4702.1       | 4702           | NDUFA8      | NADH dehydrogenase (ubiquinone) 1 alpha subcomplex, 8, 19kDa                                         | Locus type: gene with protein product, function known or inferred/Aliases: PGIV, MGC793/HUGO ID: 7692/UniProt ID: P51970/       |
| 6303.1       | 6303           | SAT         | spermidine/spermine N1-acetyltransferase                                                             |                                                                                                                                 |
| 6489.1       | 6489           | SIAT8A      | sialyltransferase 8A (alpha-N-acetylneuraminic acid: alpha-2,8-sialyltransferase, GD3 synthase)      | Aliases: ST8Sia I/HUGO ID: 10869/UniProt ID: Q92185/                                                                            |
| 3420.1       | 3420           | IDH3B       | isocitrate dehydrogenase 3 (NAD+) beta                                                               | HUGO ID: 5385/UniProt ID: O43837/                                                                                               |
| 501.1        | 501            | ALDH7A1     | aldehyde dehydrogenase 7 family, member A1                                                           | HUGO ID: 877/UniProt ID: P49419/                                                                                                |
| 622.1        | 622            | BDH1        | 3-hydroxybutyrate dehydrogenase (heart, mitochondrial)                                               | HUGO ID: 1027/UniProt ID: Q02338/                                                                                               |
| 8942.1       | 8942           | KYNU        | kynureninase (L-kynurenine hydrolase)                                                                |                                                                                                                                 |
| 3038.1       | 3038           | HAS3        | hyaluronan synthase 3                                                                                | transcript: NM_005329                                                                                                           |
| 4051.1       | 4051           | CYP4F3      | cytochrome P450, family 4, subfamily F, polypeptide 3                                                |                                                                                                                                 |
| 9162.1       | 9162           | DGKI        | diacylglycerol kinase, iota                                                                          | HUGO ID: 2855/UniProt ID: O75912/                                                                                               |
| 2730.1       | 2730           | GCLM        | glutamate-cysteine ligase, modifier subunit                                                          | HUGO ID: 4312/UniProt ID: P48507/                                                                                               |
| 15.1         | 15             | AANAT       | arylalkylamine N-acetyltransferase                                                                   | Aliases: SNAT/HUGO ID: 19/UniProt ID: Q16613/                                                                                   |
| 7381.1       | 7381           | UQCRB       | ubiquinol-cytochrome c reductase binding protein                                                     | Aliases: QP-C/HUGO ID: 12582/UniProt ID: P14927/                                                                                |
| 6392.1       | 6392           | SDHD        | succinate dehydrogenase complex, subunit D, integral membrane protein                                | *PubMed                                                                                                                         |
| 5139.1       | 5139           | PDE3A       | phosphodiesterase 3A, cGMP-inhibited                                                                 |                                                                                                                                 |
| 4728.1       | 4728           | NDUFS8      | NADH dehydrogenase (ubiquinone) Fe-S protein 8, 23kDa (NADH-coenzyme Q reductase)                    |                                                                                                                                 |
| 4538.1       | 4538           | MTND4       | NADH dehydrogenase 4                                                                                 | HUGO ID: 7459/UniProt ID: P03905/                                                                                               |
| 113.1        | 113            | ADCY7       | adenylate cyclase 7                                                                                  | Aliases: KIAA0037/HUGO ID: 238/UniProt ID: P51828/                                                                              |
| 6716.1       | 6716           | SRD5A2      | steroid-5-alpha-reductase, alpha polypeptide 2 (3-oxo-5 alpha-steroid delta 4-dehydrogenase alpha 2) | HUGO ID: 11285/UniProt ID: P31213/                                                                                              |
| 4967.1       | 4967           | OGDH        | oxoglutarate (alpha-ketoglutarate) dehydrogenase (lipoamide)                                         | transcript: NM_001003941                                                                                                        |
| 6185.1       | 6185           | RPN2        | ribophorin II                                                                                        | HUGO ID: 10382/UniProt ID: P04844/                                                                                              |
| 4860.1       | 4860           | NP          | nucleoside phosphorylase                                                                             | HUGO ID: 7892/UniProt ID: P00491/                                                                                               |
| 29922.1      | 29922          | NME7        | non-metastatic cells 7, protein expressed in (nucleoside-diphosphate kinase)                         | Locus type: gene with protein product, function known or inferred/HUGO ID: 20461/UniProt ID: Q9Y5B8/MGD ID: MGI:2449121/        |
| 211.1        | 211            | ALAS1       | aminolevulinic acid, delta-, synthase 1                                                              | HUGO ID: 396/UniProt ID: P13196/                                                                                                |
| 30833.1      | 30833          | NT5C        | 5', 3'-nucleotidase, cytosolic                                                                       | Aliases: DNT1, DNT-1, PN-1, cdN, dNT-1, HGNC:12561/HUGO ID: 17144/UniProt ID: Q8TCD5/                                           |
| 5105.1       | 5105           | PCK1        | phosphoenolpyruvate carboxykinase 1 (soluble)                                                        | HUGO ID: 8724/UniProt ID: P35558/                                                                                               |
| 4129.1       | 4129           | MAOB        | monoamine oxidase B                                                                                  | HUGO ID: 6834/UniProt ID: P27338/                                                                                               |
| 9956.1       | 9956           | HS3ST2      | heparan sulfate (glucosamine) 3-O-sulfotransferase 2                                                 | Locus type: gene with protein product, function known or inferred/Aliases: 3OST2/HUGO ID: 5195/UniProt ID: Q9Y278/              |
| 4355.1       | 4355           | MPO         | myeloperoxidase                                                                                      | HUGO ID: 7218/UniProt ID: P05164/                                                                                               |
| 56052.1      | 56052          | ALG1        | asparagine-linked glycosylation 1 homolog (yeast, beta-1,4-mannosyltransferase)                      | Locus type: gene with protein product, function known or inferred/Aliases: HMT-1, HMT1/HUGO ID: 18294/UniProt ID: Q8NSY4/       |
| 23498.1      | 23498          | HAAO        | 3-hydroxyanthranilate 3,4-dioxygenase                                                                | HUGO ID: 4796/UniProt ID: P46952/                                                                                               |
| 7358.1       | 7358           | UGDH        | UDP-glucose dehydrogenase                                                                            |                                                                                                                                 |
| 5048.1       | 5048           | PAFAH1B1    | platelet-activating factor acetylhydrolase, isoform 1b, alpha subunit 45kDa                          |                                                                                                                                 |
| 1632.1       | 1632           | DCI         | dodecenoyl-Coenzyme A delta isomerase (3,2 trans-enoyl-Coenzyme A isomerase)                         | HUGO ID: 2703/UniProt ID: P42126/                                                                                               |
| 2990.1       | 2990           | GUSB        | glucuronidase, beta                                                                                  | HUGO ID: 4696/UniProt ID: P08236/                                                                                               |
| 5167.1       | 5167           | ENPP1       | ectonucleotide pyrophosphatase/phosphodiesterase 1                                                   | Aliases: PC-1, PCA1/HUGO ID: 3356/UniProt ID: P22413/                                                                           |
| 4023.1       | 4023           | LPL         | lipoprotein lipase                                                                                   | HUGO ID: 6677/UniProt ID: P06858/                                                                                               |
| 4144.1       | 4144           | MAT2A       | methionine adenosyltransferase II, alpha                                                             | Aliases: SAMS2, MATA2, MATII/HUGO ID: 6904/UniProt ID: P31153/                                                                  |
| 2937.1       | 2937           | GSS         | glutathione synthetase                                                                               | HUGO ID: 4624/UniProt ID: P48637/                                                                                               |
| 9334.1       | 9334           | B4GALT5     | UDP-Gal:betaGlcNAc beta 1,4-galactosyltransferase, polypeptide 5                                     |                                                                                                                                 |
| 51733.1      | 51733          | UPB1        | ureidopropionase, beta                                                                               | Aliases: BUP1/HUGO ID: 16297/UniProt ID: Q9UBR1/                                                                                |
| 3251.1       | 3251           | HPRT1       | hypoxanthine phosphoribosyltransferase 1 (Lesch-Nyhan syndrome)                                      | Locus type: gene with protein product, function known or inferred/Aliases: HGPR1/HUGO ID: 5157/UniProt ID: P00492/              |
| 4669.1       | 4669           | NAGLU       | N-acetylglucosaminidase, alpha- (Sanfilippo disease IIIB)                                            | Aliases: NAG/HUGO ID: 7632/UniProt ID: P54802/                                                                                  |
| 4713.1       | 4713           | NDUFB7      | NADH dehydrogenase (ubiquinone) 1 beta subcomplex, 7, 18kDa                                          |                                                                                                                                 |
| 4537.1       | 4537           | MTND3       | NADH dehydrogenase 3                                                                                 | HUGO ID: 7458/UniProt ID: P03897/                                                                                               |
| 7296.1       | 7296           | TXNRD1      | thioredoxin reductase 1                                                                              | Locus type: gene with protein product, function known or inferred/Aliases: TXNR/HUGO ID: 12437/UniProt ID: Q16881/              |
| 5831.1       | 5831           | PYCR1       | pyrroline-5-carboxylate reductase 1                                                                  | Aliases: P5C/HUGO ID: 9721/UniProt ID: P32322/                                                                                  |
| 3631.1       | 3631           | INPP4A      | inositol polyphosphate-4-phosphatase, type I, 107kDa                                                 | transcript: NM_001566                                                                                                           |
| 1584.1       | 1584           | CYP11B1     | cytochrome P450, family 11, subfamily B, polypeptide 1                                               | Locus type: gene with protein product, function known or inferred/Aliases: P450C11, FHI, CPN1/HUGO ID: 2591/UniProt ID: P15538/ |
| 3613.1       | 3613           | IMPA2       | inositol-(myo)-1(or 4)-monophosphatase 2                                                             | HUGO ID: 6051/UniProt ID: O14732/                                                                                               |
| 3795.1       | 3795           | KHK         | ketohexokinase (fructokinase)                                                                        | HUGO ID: 6315/UniProt ID: P50053/                                                                                               |
| 2135.1       | 2135           | EXTL2       | exostosins (multiple)-like 2                                                                         | HUGO ID: 3516/UniProt ID: Q9UBQ6/                                                                                               |

| Abbreviation | Entrez Gene ID | Gene Symbol | Putative Function                                                                                | Additional notes                                                                                                                                       |
|--------------|----------------|-------------|--------------------------------------------------------------------------------------------------|--------------------------------------------------------------------------------------------------------------------------------------------------------|
| 10380.1      | 10380          | BPNT1       | 3'(2'), 5'-bisphosphate nucleotidase 1                                                           | Locus type: gene with protein product, function known or inferred/HUGO ID: 1096/UniProt ID: Q8WVL5/                                                    |
| 224.1        | 224            | ALDH3A2     | aldehyde dehydrogenase 3 family, member A2                                                       | Aliases: FALDH/HUGO ID: 403/UniProt ID: P51648/                                                                                                        |
| 3422.1       | 3422           | IDI1        | isopentenyl-diphosphate delta isomerase                                                          | Locus type: gene with protein product, function known or inferred/HUGO ID: 5387/UniProt ID: Q13907/                                                    |
| 7083.1       | 7083           | TK1         | thymidine kinase 1, soluble                                                                      | HUGO ID: 11830/UniProt ID: P04183/                                                                                                                     |
| 1160.1       | 1160           | CKMT2       | creatine kinase, mitochondrial 2 (sarcomeric)                                                    | Aliases: SMTCK/HUGO ID: 1996/UniProt ID: P17540/                                                                                                       |
| 4048.1       | 4048           | LTA4H       | leukotriene A4 hydrolase                                                                         | Locus type: gene with protein product, function known or inferred/HUGO ID: 6710/UniProt ID: P09960/                                                    |
| 2762.1       | 2762           | GMD5        | GDP-mannose 4,6-dehydratase                                                                      | Aliases: GMD/HUGO ID: 4369/UniProt ID: O60547/                                                                                                         |
| 1119.1       | 1119           | CHK         | choline kinase                                                                                   |                                                                                                                                                        |
| 5730.1       | 5730           | PTGDS       | prostaglandin D2 synthase 21kDa (brain)                                                          | Locus type: gene with protein product, function known or inferred/HUGO ID: 9592/UniProt ID: P41222/                                                    |
| 5149.1       | 5149           | PDE6H       | phosphodiesterase 6H, cGMP-specific, cone, gamma                                                 | HUGO ID: 8790/UniProt ID: Q13956/                                                                                                                      |
| 8821.1       | 8821           | INPP4B      | inositol polyphosphate-4-phosphatase, type II, 105kDa                                            | Locus type: gene with protein product, function known or inferred/HUGO ID: 6075/UniProt ID: O15327/                                                    |
| 3283.1       | 3283           | HSD3B1      | hydroxy-delta-5-steroid dehydrogenase, 3 beta- and steroid delta-isomerase 1                     | Locus type: gene with protein product, function known or inferred/HUGO ID: 5217/UniProt ID: P14060/                                                    |
| 3141.1       | 3141           | HLCS        | holocarboxylase synthetase (biotin-[proprionyl-Coenzyme A carboxylase (ATP-hydrolysing)] ligase) | Aliases: HCS/HUGO ID: 4976/UniProt ID: P50747/                                                                                                         |
| 8789.1       | 8789           | FBP2        | fructose-1,6-bisphosphatase 2                                                                    | HUGO ID: 3607/UniProt ID: O00757/                                                                                                                      |
| 1503.1       | 1503           | CTPS        | CTP synthase                                                                                     | Locus type: gene with protein product, function known or inferred/HUGO ID: 2519/UniProt ID: P17812/                                                    |
| 95.1         | 95             | ACY1        | aminoacylase 1                                                                                   | HUGO ID: 177/UniProt ID: Q03154/                                                                                                                       |
| 23632.1      | 23632          | CA14        | carbonic anhydrase XIV                                                                           | HUGO ID: 1372/UniProt ID: Q9ULX7/                                                                                                                      |
| 4758.1       | 4758           | NEU1        | sialidase 1 (lysosomal sialidase)                                                                | HUGO ID: 7758/UniProt ID: Q99519/                                                                                                                      |
| 1716.1       | 1716           | DGUOK       | deoxyguanosine kinase                                                                            | Aliases: dGK/HUGO ID: 2858/UniProt ID: Q16854/                                                                                                         |
| 7167.1       | 7167           | TP1         | triosephosphate isomerase 1                                                                      | HUGO ID: 12009/UniProt ID: P00938/                                                                                                                     |
| 1431.1       | 1431           | CS          | citrate synthase                                                                                 | HUGO ID: 2422/UniProt ID: O75390/                                                                                                                      |
| 518.1        | 518            | ATP5G3      | ATP synthase, H+ transporting, mitochondrial F0 complex, subunit c (subunit 9) isoform 3         | HUGO ID: 843/UniProt ID: P48201/Variant 1: This variant represents the longest transcript. Transcript variants 1, 2 and 3 encode the same protein.     |
| 4539.1       | 4539           | MTND4L      | NADH dehydrogenase 4L                                                                            | HUGO ID: 7460/UniProt ID: P03901/                                                                                                                      |
| 2271.1       | 2271           | FH          | fumarate hydratase                                                                               | Locus type: gene with protein product, function known or inferred/HUGO ID: 3700/UniProt ID: P07954/                                                    |
| 1594.1       | 1594           | CYP27B1     | cytochrome P450, family 27, subfamily B, polypeptide 1                                           |                                                                                                                                                        |
| 4697.1       | 4697           | NDUFA4      | NADH dehydrogenase (ubiquinone) 1 alpha subcomplex, 4, 9kDa                                      | Locus type: gene with protein product, function known or inferred/Aliases: MLRQ/HUGO ID: 7687/UniProt ID: O00483/                                      |
| 760.1        | 760            | CA2         | carbonic anhydrase II                                                                            | HUGO ID: 1373/UniProt ID: P00918/                                                                                                                      |
| 4128.1       | 4128           | MAOA        | monoamine oxidase A                                                                              | HUGO ID: 6833/UniProt ID: P21397/                                                                                                                      |
| 6184.1       | 6184           | RPN1        | ribophorin 1                                                                                     | HUGO ID: 10381/UniProt ID: P04843/                                                                                                                     |
| 9377.1       | 9377           | COX5A       | cytochrome c oxidase subunit Va                                                                  |                                                                                                                                                        |
| 410.1        | 410            | ARSA        | arylsulfatase A                                                                                  | HUGO ID: 713/UniProt ID: P15289/                                                                                                                       |
| 1373.1       | 1373           | CPS1        | carbamoyl-phosphate synthetase 1, mitochondrial                                                  | HUGO ID: 2323/UniProt ID: P31327/                                                                                                                      |
| 1565.1       | 1565           | CYP2D6      | cytochrome P450, family 2, subfamily D, polypeptide 6                                            | Locus type: gene with protein product, function known or inferred/Aliases: HGNC:2629, CPD6, P450-DB1, CYP2D, P450C2D/HUGO ID: 2625/UniProt ID: P10635/ |
| 2651.1       | 2651           | GCNT2       | glucosaminyl (N-acetyl) transferase 2, I-branching enzyme                                        |                                                                                                                                                        |
| 18.1         | 18             | ABAT        | 4-aminobutyrate aminotransferase                                                                 | Aliases: GABAT/HUGO ID: 23/UniProt ID: P80404/                                                                                                         |
| 2131.1       | 2131           | EXT1        | exostosin (multiple) 1                                                                           | HUGO ID: 3512/UniProt ID: Q16394/                                                                                                                      |
| 5464.1       | 5464           | PP          | pyrophosphatase (inorganic)                                                                      | *PubMed                                                                                                                                                |
| 10157.1      | 10157          | AASS        | aminoacidipate-semialdehyde synthase                                                             | Aliases: LORSDH, LKRSDH, AASS/HUGO ID: 17366/UniProt ID: O95462/                                                                                       |
| 6999.1       | 6999           | TDO2        | tryptophan 2,3-dioxygenase                                                                       | HUGO ID: 11708/UniProt ID: P48775/                                                                                                                     |
| 3292.1       | 3292           | HSD17B1     | hydroxysteroid (17-beta) dehydrogenase 1                                                         | Aliases: HSD17/HUGO ID: 5210/UniProt ID: P14061/                                                                                                       |
| 2572.1       | 2572           | GAD2        | glutamate decarboxylase 2 (pancreatic islets and brain, 65kDa)                                   | Locus type: gene with protein product, function known or inferred/Aliases: GAD65/HUGO ID: 4093/UniProt ID: Q05329/                                     |
| 8833.1       | 8833           | GMPS        | guanine monophosphate synthetase                                                                 |                                                                                                                                                        |
| 4729.1       | 4729           | NDUFV2      | NADH dehydrogenase (ubiquinone) flavoprotein 2, 24kDa                                            |                                                                                                                                                        |
| 5742.1       | 5742           | PTGS1       | prostaglandin-endoperoxide synthase 1 (prostaglandin G/H synthase and cyclooxygenase)            |                                                                                                                                                        |
| 2597.1       | 2597           | GAPDH       | glyceraldehyde-3-phosphate dehydrogenase                                                         | Aliases: GAPDH/HUGO ID: 4141/UniProt ID: P04406/                                                                                                       |
| 4837.1       | 4837           | NNMT        | nicotinamide N-methyltransferase                                                                 | HUGO ID: 7861/UniProt ID: P40261/                                                                                                                      |
| 5168.1       | 5168           | ENPP2       | ectonucleotide pyrophosphatase/phosphodiesterase 2 (autotaxin)                                   | Aliases: ATX, PD-IALPHA/HUGO ID: 3357/UniProt ID: Q13822/                                                                                              |
| 7359.1       | 7359           | UGP1        | UDP-glucose pyrophosphorylase 1                                                                  | Locus type: gene with protein product, function known or inferred/Aliases: UGPP1/HUGO ID: 12526/                                                       |
| 5836.1       | 5836           | PYGL        | phosphorylase, glycogen; liver (Hers disease, glycogen storage disease type VI)                  | HUGO ID: 9725/UniProt ID: P06737/                                                                                                                      |
| 5352.1       | 5352           | PLOD2       | procollagen-lysine, 2-oxoglutarate 5-dioxygenase (lysine hydroxylase) 2                          | Locus type: gene with protein product, function known or inferred/HUGO ID: 9082/UniProt ID: O00469/                                                    |
| 2986.1       | 2986           | GUCY2F      | guanylate cyclase 2F, retinal                                                                    |                                                                                                                                                        |
| 2517.1       | 2517           | FUCA1       | fucosidase, alpha-L-, tissue                                                                     | Locus type: gene with protein product, function known or inferred/HUGO ID: 4006/UniProt ID: P04066/MGI: MGI:95593/                                     |

| Abbreviation | Entrez Gene ID | Gene Symbol | Putative Function                                                                                                                                              | Additional notes                                                                                                             |
|--------------|----------------|-------------|----------------------------------------------------------------------------------------------------------------------------------------------------------------|------------------------------------------------------------------------------------------------------------------------------|
| 4200.1       | 4200           | ME2         | malic enzyme 2, NAD(+)-dependent, mitochondrial                                                                                                                | Locus type: gene with protein product, function known or inferred/HUGO ID: 6984/UniProt ID: P23368/                          |
| 1551.1       | 1551           | CYP3A7      | cytochrome P450, family 3, subfamily A, polypeptide 7                                                                                                          | Locus type: gene with protein product, function known or inferred/Aliases: CP37, P450-HFLA/HUGO ID: 2640/UniProt ID: P24462/ |
| 64080.1      | 64080          | RBKS        | ribokinase                                                                                                                                                     |                                                                                                                              |
| 51268.1      | 51268          | PIPOX       | pipecolic acid oxidase                                                                                                                                         |                                                                                                                              |
| 1583.1       | 1583           | CYP11A1     | cytochrome P450, family 11, subfamily A, polypeptide 1                                                                                                         | Locus type: gene with protein product, function known or inferred/Aliases: P450SCC/HUGO ID: 2590/UniProt ID: P05108/         |
| 5214.1       | 5214           | PFKP        | phosphofructokinase, platelet                                                                                                                                  | Locus type: gene with protein product, function known or inferred/Aliases: PFK-C, PFKF/HUGO ID: 8878/UniProt ID: Q01813/     |
| 4710.1       | 4710           | NDUFB4      | NADH dehydrogenase (ubiquinone) 1 beta subcomplex, 4, 15kDa                                                                                                    | Locus type: gene with protein product, function known or inferred/Aliases: B15/HUGO ID: 7699/UniProt ID: O95168/             |
| 8659.1       | 8659           | ALDH4A1     | aldehyde dehydrogenase 4 family, member A1                                                                                                                     | Aliases: P5CDh/HUGO ID: 406/UniProt ID: P30038/                                                                              |
| 221.1        | 221            | ALDH3B1     | aldehyde dehydrogenase 3 family, member B1                                                                                                                     |                                                                                                                              |
| 55577.1      | 55577          | NAGK        | N-acetylglucosamine kinase                                                                                                                                     | Aliases: GNK/HUGO ID: 17174/UniProt ID: Q9UJ70/                                                                              |
| 6818.1       | 6818           | SULT1A3     | sulfotransferase family, cytosolic, 1A, phenol-preferring, member 3                                                                                            |                                                                                                                              |
| 1572.1       | 1572           | CYP2F1      | cytochrome P450, family 2, subfamily F, polypeptide 1                                                                                                          | Locus type: gene with protein product, function known or inferred/HUGO ID: 2632/UniProt ID: P24903/                          |
| 8564.1       | 8564           | KMO         | kynurenine 3-monooxygenase (kynurenine 3-hydroxylase)                                                                                                          | HUGO ID: 6381/UniProt ID: O15229/MGD ID: MGI:2138151/                                                                        |
| 1555.1       | 1555           | CYP2B6      | cytochrome P450, family 2, subfamily B, polypeptide 6                                                                                                          |                                                                                                                              |
| 10682.1      | 10682          | EBP         | emopamil binding protein (sterol isomerase)                                                                                                                    |                                                                                                                              |
| 3632.1       | 3632           | INPP5A      | inositol polyphosphate-5-phosphatase, 40kDa                                                                                                                    | Locus type: gene with protein product, function known or inferred/Aliases: 5PTASE/HUGO ID: 6076/UniProt ID: Q14642/          |
| 65220.1      | 65220          | FLJ13052    | NAD kinase                                                                                                                                                     | transcript: NM_023018                                                                                                        |
| 9061.1       | 9061           | PAPSS1      | 3'-phosphoadenosine 5'-phosphosulfate synthase 1                                                                                                               | *PubMed                                                                                                                      |
| 3425.1       | 3425           | IDUA        | iduronidase, alpha-L-                                                                                                                                          | HUGO ID: 5391/UniProt ID: P35475/                                                                                            |
| 5145.1       | 5145           | PDE6A       | phosphodiesterase 6A, cGMP-specific, rod, alpha                                                                                                                | HUGO ID: 8785/UniProt ID: P16499/                                                                                            |
| 1158.1       | 1158           | CKM         | creatine kinase, muscle                                                                                                                                        | HUGO ID: 1994/UniProt ID: P06732/                                                                                            |
| 10606.1      | 10606          | PAICS       | phosphoribosylaminoimidazole carboxylase, phosphoribosylaminoimidazole succinocarboxamide synthetase                                                           |                                                                                                                              |
| 7084.1       | 7084           | TK2         | thymidine kinase 2, mitochondrial                                                                                                                              | HUGO ID: 11831/UniProt ID: O00142/                                                                                           |
| 318.1        | 318            | NUDT2       | nudix (nucleoside diphosphate linked moiety X)-type motif 2                                                                                                    |                                                                                                                              |
| 54677.1      | 54677          | CROT        | carnitine O-octanoyltransferase                                                                                                                                | Aliases: COT/HUGO ID: 2366/UniProt ID: Q9UKG9/                                                                               |
| 2950.1       | 2950           | GSTP1       | glutathione S-transferase pi                                                                                                                                   |                                                                                                                              |
| 10026.1      | 10026          | PIGK        | phosphatidylinositol glycan, class K                                                                                                                           | Aliases: hGPI8/HUGO ID: 8965/UniProt ID: Q92643/                                                                             |
| 7166.1       | 7166           | TPH1        | tryptophan hydroxylase 1 (tryptophan 5-monooxygenase)                                                                                                          | Locus type: gene with protein product, function known or inferred/HUGO ID: 12008/UniProt ID: P17752/                         |
| 159.1        | 159            | ADSS        | adenylosuccinate synthase                                                                                                                                      |                                                                                                                              |
| 4121.1       | 4121           | MAN1A1      | mannosidase, alpha, class 1A, member 1                                                                                                                         | HUGO ID: 6821/UniProt ID: P33908/                                                                                            |
| 4594.1       | 4594           | MUT         | methylmalonyl Coenzyme A mutase                                                                                                                                |                                                                                                                              |
| 8513.1       | 8513           | LIPF        | lipase, gastric                                                                                                                                                |                                                                                                                              |
| 5034.1       | 5034           | P4HB        | procollagen-proline, 2-oxoglutarate 4-dioxygenase (proline 4-hydroxylase), beta polypeptide (protein disulfide isomerase; thyroid hormone binding protein p55) | HUGO ID: 8548/UniProt ID: P07237/                                                                                            |
| 6487.1       | 6487           | ST3GAL3     | ST3 beta-galactoside alpha-2,3-sialyltransferase 3                                                                                                             | Locus type: gene with protein product, function known or inferred/Aliases: ST3Gal III/HUGO ID: 10866/UniProt ID: Q11203/     |
| 1717.1       | 1717           | DHCR7       | 7-dehydrocholesterol reductase                                                                                                                                 |                                                                                                                              |
| 6241.1       | 6241           | RRM2        | ribonucleotide reductase M2 polypeptide                                                                                                                        | HUGO ID: 10452/UniProt ID: P31350/                                                                                           |
| 2683.1       | 2683           | B4GALT1     | UDP-Gal:betaGlcNAc beta 1,4-galactosyltransferase, polypeptide 1                                                                                               | Locus type: gene with protein product, function known or inferred/Aliases: beta4Gal-T1/HUGO ID: 924/UniProt ID: P15291/      |
| 517.1        | 517            | ATP5G2      | ATP synthase, H+ transporting, mitochondrial F0 complex, subunit c (subunit 9), isoform 2                                                                      | HUGO ID: 842/UniProt ID: Q06055/Variant 1: This variant represents the longer transcript, and encodes the longer isoform 2a. |
| 26289.1      | 26289          | AK5         | adenylate kinase 5                                                                                                                                             | HUGO ID: 365/UniProt ID: Q9Y6K8/                                                                                             |
| 1621.1       | 1621           | DBH         | dopamine beta-hydroxylase (dopamine beta-monooxygenase)                                                                                                        | HUGO ID: 2689/UniProt ID: P09172/                                                                                            |
| 29880.1      | 29880          | ALG5        | asparagine-linked glycosylation 5 homolog (yeast, dolichyl-phosphate beta-glucosyltransferase)                                                                 | Locus type: gene with protein product, function known or inferred/Aliases: bA421P11.2/HUGO ID: 20266/UniProt ID: Q9Y673/     |
| 4696.1       | 4696           | NDUFA3      | NADH dehydrogenase (ubiquinone) 1 alpha subcomplex, 3, 9kDa                                                                                                    | Aliases: B9/HUGO ID: 7686/UniProt ID: O95167/                                                                                |
| 8802.1       | 8802           | SUCLG1      | succinate-CoA ligase, GDP-forming, alpha subunit                                                                                                               | Locus type: gene with protein product, function known or inferred/HUGO ID: 11449/UniProt ID: P53597/                         |
| 481.1        | 481            | ATP1B1      | ATPase, Na+/K+ transporting, beta 1 polypeptide                                                                                                                | HUGO ID: 804/UniProt ID: P05026/                                                                                             |
| 2132.1       | 2132           | EXT2        | exostosins (multiple) 2                                                                                                                                        | NM_000401                                                                                                                    |
| 4842.1       | 4842           | NOS1        | nitric oxide synthase 1 (neuronal)                                                                                                                             |                                                                                                                              |
| 11181.1      | 11181          | TREH        | trehalase (brush-border membrane glycoprotein)                                                                                                                 | Aliases: TRE, TREA/HUGO ID: 12266/UniProt ID: O43280/                                                                        |
| 4700.1       | 4700           | NDUFA6      | NADH dehydrogenase (ubiquinone) 1 alpha subcomplex, 6, 14kDa                                                                                                   |                                                                                                                              |
| 5837.1       | 5837           | PYGM        | phosphorylase, glycogen; muscle (McArdle syndrome, glycogen storage disease type V)                                                                            | HUGO ID: 9726/UniProt ID: P11217/                                                                                            |

| Abbreviation | Entrez Gene ID | Gene Symbol | Putative Function                                                                              | Additional notes                                                                                                                                 |
|--------------|----------------|-------------|------------------------------------------------------------------------------------------------|--------------------------------------------------------------------------------------------------------------------------------------------------|
| 111.1        | 111            | ADCY5       | adenylate cyclase 5                                                                            | Locus type: gene with protein product, function known or inferred/HUGO ID: 236/UniProt ID: O95622/                                               |
| 5743.1       | 5743           | PTGS2       | prostaglandin-endoperoxide synthase 2 (prostaglandin G/H synthase and cyclooxygenase)          | Aliases: COX2/HUGO ID: 9605/UniProt ID: P35354/                                                                                                  |
| 2571.1       | 2571           | GAD1        | glutamate decarboxylase 1 (brain, 67kDa)                                                       | HUGO ID: 4092/UniProt ID: Q99259/                                                                                                                |
| 570.1        | 570            | BAAT        | bile acid Coenzyme A: amino acid N-acyltransferase (glycine N-choloyltransferase)              | Aliases: BAT/HUGO ID: 932/UniProt ID: Q14032/                                                                                                    |
| 3294.1       | 3294           | HSD17B2     | hydroxysteroid (17-beta) dehydrogenase 2                                                       | Aliases: HSD17/HUGO ID: 5211/UniProt ID: P37059/                                                                                                 |
| 4726.1       | 4726           | NDUFS6      | NADH dehydrogenase (ubiquinone) Fe-S protein 6, 13kDa (NADH-coenzyme Q reductase)              | HUGO ID: 7713/UniProt ID: O75380/                                                                                                                |
| 2940.1       | 2940           | GSTA3       | glutathione S-transferase A3                                                                   |                                                                                                                                                  |
| 7915.1       | 7915           | ALDH5A1     | aldehyde dehydrogenase 5 family, member A1 (succinate-semialdehyde dehydrogenase)              |                                                                                                                                                  |
| 1595.1       | 1595           | CYP51A1     | cytochrome P450, family 51, subfamily A, polypeptide 1                                         | Locus type: gene with protein product, function known or inferred/Aliases: CP51, CYPL1, P450L1, LDM, P450-14DM/HUGO ID: 2649/UniProt ID: Q16850/ |
| 3945.1       | 3945           | LDHB        | lactate dehydrogenase B                                                                        | Locus type: gene with protein product, function known or inferred/HUGO ID: 6541/UniProt ID: P07195/                                              |
| 8694.1       | 8694           | DGAT1       | diacylglycerol O-acyltransferase homolog 1 (mouse)                                             | Locus type: gene with protein product, function known or inferred/Aliases: ARGP1, DGAT/HUGO ID: 2843/UniProt ID: O75907/                         |
| 5634.1       | 5634           | PRPS2       | phosphoribosyl pyrophosphate synthetase 2                                                      | Aliases: PRS II/HUGO ID: 9465/UniProt ID: P11908/                                                                                                |
| 54363.1      | 54363          | HAO1        | hydroxyacid oxidase (glycolate oxidase) 1                                                      | Aliases: GOX, HAO1/HUGO ID: 4809/UniProt ID: Q9UJM8/                                                                                             |
| 272.1        | 272            | AMPD3       | adenosine monophosphate deaminase (isoform E)                                                  | HUGO ID: 470/UniProt ID: Q01432/                                                                                                                 |
| 55811.1      | 55811          | SAC         | testicular soluble adenylyl cyclase                                                            | transcript: NM_018417                                                                                                                            |
| 4548.1       | 4548           | MTR         | 5-methyltetrahydrofolate-homocysteine methyltransferase                                        | Locus type: gene with protein product, function known or inferred/HUGO ID: 7468/UniProt ID: Q99707/                                              |
| 4351.1       | 4351           | MPI         | mannose phosphate isomerase                                                                    | HUGO ID: 7216/UniProt ID: P34949/                                                                                                                |
| 9653.1       | 9653           | HS2ST1      | heparan sulfate 2-O-sulfotransferase 1                                                         | Aliases: KIAA0448/HUGO ID: 5193/UniProt ID: O75036/                                                                                              |
| 5144.1       | 5144           | PDE4D       | phosphodiesterase 4D, cAMP-specific (phosphodiesterase E3 duncce homolog, Drosophila)          | HUGO ID: 8783/UniProt ID: Q08499/                                                                                                                |
| 3295.1       | 3295           | HSD17B4     | hydroxysteroid (17-beta) dehydrogenase 4                                                       | HUGO ID: 5213/UniProt ID: P51659/                                                                                                                |
| 5169.1       | 5169           | ENPP3       | ectonucleotide pyrophosphatase/phosphodiesterase 3                                             | Aliases: PD-IBETA, gp130RB13-6, B10, CD203C/HUGO ID: 3358/UniProt ID: O14638/                                                                    |
| 26279.1      | 26279          | PLA2G2D     | phospholipase A2, group IID                                                                    | Aliases: sPLA2S/HUGO ID: 9033/UniProt ID: Q9UNK4/                                                                                                |
| 222.1        | 222            | ALDH3B2     | aldehyde dehydrogenase 3 family, member B2                                                     |                                                                                                                                                  |
| 2983.1       | 2983           | GUCY1B3     | guanylate cyclase 1, soluble, beta 3                                                           | Aliases: GC-SB3, GC-S-beta-1/HUGO ID: 4687/UniProt ID: Q02153/                                                                                   |
| 2876.1       | 2876           | GPX1        | glutathione peroxidase 1                                                                       | HUGO ID: 4553/UniProt ID: P07203/                                                                                                                |
| 4711.1       | 4711           | NDUFB5      | NADH dehydrogenase (ubiquinone) 1 beta subcomplex, 5, 16kDa                                    | Locus type: gene with protein product, function known or inferred/Aliases: SGDH, CI-SGDH, MGC12314/HUGO ID: 7700/UniProt ID: O43674/             |
| 1159.1       | 1159           | CKMT1B      | creatine kinase, mitochondrial 1B (ubiquitous)                                                 | Aliases: UMTCK/HUGO ID: 1995/UniProt ID: P12532/                                                                                                 |
| 3633.1       | 3633           | INPP5B      | inositol polyphosphate-5-phosphatase, 75kDa                                                    | Locus type: gene with protein product, function known or inferred/HUGO ID: 6077/UniProt ID: P32019/                                              |
| 2137.1       | 2137           | EXTL3       | exostosins (multiple)-like 3                                                                   |                                                                                                                                                  |
| 10858.1      | 10858          | CYP46A1     | cytochrome P450, family 46, subfamily A, polypeptide 1                                         | Locus type: gene with protein product, function known or inferred/HUGO ID: 2641/UniProt ID: Q9Y6A2/                                              |
| 1571.1       | 1571           | CYP2E1      | cytochrome P450, family 2, subfamily E, polypeptide 1                                          | Locus type: gene with protein product, function known or inferred/HUGO ID: 2631/UniProt ID: P05181/                                              |
| 11226.1      | 11226          | GALNT6      | UDP-N-acetyl-alpha-D-galactosamine:polypeptide N-acetylgalactosaminyltransferase 6 (GalNAc-T6) | Locus type: gene with protein product, function known or inferred/HUGO ID: 4128/UniProt ID: Q8NCL4/                                              |
| 384.1        | 384            | ARG2        | arginase, type II                                                                              | HUGO ID: 664/UniProt ID: P78540/                                                                                                                 |
| 27165.1      | 27165          | GA          | liver mitochondrial glutaminase                                                                |                                                                                                                                                  |
| 8704.1       | 8704           | B4GALT2     | UDP-Gal:betaGlcNAc beta 1,4- galactosyltransferase, polypeptide 2                              | transcript: NM_001005417                                                                                                                         |
| 9167.1       | 9167           | COX7A2L     | cytochrome c oxidase subunit VIIa polypeptide 2 like                                           | Locus type: gene with protein product, function known or inferred/Aliases: EB1, COX7RP, COX7AR, SIG81/HUGO ID: 2289/UniProt ID: O14548/          |
| 5321.1       | 5321           | PLA2G4A     | phospholipase A2, group IVA (cytosolic, calcium-dependent)                                     | Locus type: gene with protein product, function known or inferred/Aliases: cPLA2-alpha/HUGO ID: 9035/UniProt ID: P47712/                         |
| 1312.1       | 1312           | COMT        | catechol-O-methyltransferase                                                                   | HUGO ID: 2228/UniProt ID: P21964/                                                                                                                |
| 5335.1       | 5335           | PLCG1       | phospholipase C, gamma 1 (formerly subtype 148)                                                | transcript: NM_002660                                                                                                                            |
| 239.1        | 239            | ALOX12      | arachidonate 12-lipoxygenase                                                                   | HUGO ID: 429/UniProt ID: P18054/                                                                                                                 |
| 1337.1       | 1337           | COX6A1      | cytochrome c oxidase subunit VIa polypeptide 1                                                 | Locus type: gene with protein product, function known or inferred/HUGO ID: 2277/UniProt ID: P12074/                                              |
| 2710.1       | 2710           | GK          | glycerol kinase                                                                                | Locus type: gene with protein product, function known or inferred/HUGO ID: 4289/UniProt ID: P32189/                                              |
| 6240.1       | 6240           | RRM1        | ribonucleotide reductase M1 polypeptide                                                        | HUGO ID: 10451/UniProt ID: P23921/                                                                                                               |
| 158.1        | 158            | ADSL        | adenylosuccinate lyase                                                                         | HUGO ID: 291/UniProt ID: P30566/                                                                                                                 |
| 9583.1       | 9583           | LYSAL1      | lysosomal apyrase-like 1                                                                       |                                                                                                                                                  |
| 51292.1      | 51292          | GMPR2       | guanosine monophosphate reductase 2                                                            | Locus type: gene with protein product, function known or inferred/HUGO ID: 4377/UniProt ID: Q9P2T1/                                              |
| 8566.1       | 8566           | PDXK        | pyridoxal (pyridoxine, vitamin B6) kinase                                                      | Aliases: PNK, PKH/HUGO ID: 8819/UniProt ID: O00764/                                                                                              |
| 1375.1       | 1375           | CPT1B       | carntine palmitoyltransferase 1B (muscle)                                                      | Aliases: M-CPT1, CPT1-M/HUGO ID: 2329/UniProt ID: Q92523/                                                                                        |
| 533.1        | 533            | ATP6V0B     | ATPase, H+ transporting, lysosomal 21kDa, V0 subunit c'                                        | Locus type: gene with protein product, function known or inferred/Aliases: VMA16, HATPL/HUGO ID: 861/UniProt ID: Q99437/MGD ID: MGI:1890510/     |

| Abbreviation | Entrez Gene ID | Gene Symbol | Putative Function                                                                                                              | Additional notes                                                                                                                         |
|--------------|----------------|-------------|--------------------------------------------------------------------------------------------------------------------------------|------------------------------------------------------------------------------------------------------------------------------------------|
| 10632.1      | 10632          | ATP5L       | ATP synthase, H+ transporting, mitochondrial F0 complex, subunit g                                                             |                                                                                                                                          |
| 3074.1       | 3074           | HEXB        | hexosaminidase B (beta polypeptide)                                                                                            | HUGO ID: 4879/UniProt ID: P07686/                                                                                                        |
| 56913.1      | 56913          | C1GALT1     | core 1 UDP-galactose:N-acetylgalactosamine-alpha-R beta 1,3-galactosyltransferase                                              | transcript: NM_020156                                                                                                                    |
| 8382.1       | 8382           | NME5        | non-metastatic cells 5, protein expressed in (nucleoside-diphosphate kinase)                                                   | Aliases: nm23-H5/HUGO ID: 7853/UniProt ID: P56597/                                                                                       |
| 10455.1      | 10455          | PECI        | peroxisomal D3,D2-enoyl-CoA isomerase                                                                                          | Locus type: gene with protein product, function known or inferred/Aliases: ACBD2, DRS1, HCA88/HUGO ID: 14601/UniProt ID: O75521/         |
| 8803.1       | 8803           | SUCLA2      | succinate-CoA ligase, ADP-forming, beta subunit                                                                                | HUGO ID: 11448/UniProt ID: Q9P2R7/                                                                                                       |
| 2235.1       | 2235           | FECH        | ferrochelatase (protoporphyrin)                                                                                                | HUGO ID: 3647/UniProt ID: P22830/                                                                                                        |
| 1841.1       | 1841           | DTYMK       | deoxythymidylate kinase (thymidylate kinase)                                                                                   |                                                                                                                                          |
| 2618.1       | 2618           | GART        | phosphoribosylglycinamide formyltransferase, phosphoribosylglycinamide synthetase, phosphoribosylaminoimidazole synthetase     | HUGO ID: 4163/UniProt ID: P22102/                                                                                                        |
| 9517.1       | 9517           | SPTLC2      | serine palmitoyltransferase, long chain base subunit 2                                                                         |                                                                                                                                          |
| 216.1        | 216            | ALDH1A1     | aldehyde dehydrogenase 1 family, member A1                                                                                     | Aliases: RALDH1/HUGO ID: 402/UniProt ID: P00352/                                                                                         |
| 2632.1       | 2632           | GBE1        | glucan (1,4-alpha-), branching enzyme 1 (glycogen branching enzyme, Andersen disease, glycogen storage disease type IV)        | HUGO ID: 4180/UniProt ID: Q04446/                                                                                                        |
| 29925.1      | 29925          | GMPPB       | GDP-mannose pyrophosphorylase B                                                                                                | transcript: NM_013334                                                                                                                    |
| 29968.1      | 29968          | PSAT1       | phosphoserine aminotransferase 1                                                                                               |                                                                                                                                          |
| 1635.1       | 1635           | DCFD        | dCMP deaminase                                                                                                                 | HUGO ID: 2710/UniProt ID: P32321/                                                                                                        |
| 1040.1       | 1040           | CDS1        | CDP-diacylglycerol synthase (phosphatidate cytidyltransferase) 1                                                               |                                                                                                                                          |
| 51477.1      | 51477          | ISYNA1      | myo-inositol 1-phosphate synthase A1                                                                                           | transcript: NM_016368                                                                                                                    |
| 669.1        | 669            | BPGM        | 2,3-bisphosphoglycerate mutase                                                                                                 | Locus type: gene with protein product, function known or inferred/HUGO ID: 1093/UniProt ID: P07738/                                      |
| 6888.1       | 6888           | TALDO1      | transaldolase 1                                                                                                                | HUGO ID: 11559/UniProt ID: P37837/                                                                                                       |
| 1650.1       | 1650           | DDOST       | dolichyl-diphosphooligosaccharide-protein glycosyltransferase                                                                  | Aliases: OST, KIAA0115/HUGO ID: 2728/UniProt ID: P39656/                                                                                 |
| 271.1        | 271            | AMPD2       | adenosine monophosphate deaminase 2 (isoform L)                                                                                | HUGO ID: 469/UniProt ID: Q01433/                                                                                                         |
| 3290.1       | 3290           | HSD11B1     | hydroxysteroid (11-beta) dehydrogenase 1                                                                                       | Locus type: gene with protein product, function known or inferred/HUGO ID: 5208/UniProt ID: P28845/                                      |
| 4716.1       | 4716           | NDUFB10     | NADH dehydrogenase (ubiquinone) 1 beta subcomplex, 10, 22kDa                                                                   |                                                                                                                                          |
| 5224.1       | 5224           | PGAM2       | phosphoglycerate mutase 2 (muscle)                                                                                             | HUGO ID: 8889/UniProt ID: P15259/                                                                                                        |
| 1347.1       | 1347           | COX7A2      | cytochrome c oxidase subunit VIIa polypeptide 2 (liver)                                                                        |                                                                                                                                          |
| 11238.1      | 11238          | CA5B        | carbonic anhydrase VB, mitochondrial                                                                                           | Locus type: gene with protein product, function known or inferred/HUGO ID: 1378/UniProt ID: Q9Y2D0/                                      |
| 9945.1       | 9945           | GFPT2       | glutamine-fructose-6-phosphate transaminase 2                                                                                  | Aliases: GFAT2/HUGO ID: 4242/UniProt ID: O94808/                                                                                         |
| 2589.1       | 2589           | GALNT1      | UDP-N-acetyl-alpha-D-galactosamine:polypeptide N-acetylgalactosaminyltransferase 1 (GalNAc-T1)                                 | Aliases: GalNAc-T1/HUGO ID: 4123/UniProt ID: Q10472/                                                                                     |
| 762.1        | 762            | CA4         | carbonic anhydrase IV                                                                                                          | Aliases: CAIV/HUGO ID: 1375/UniProt ID: P22748/                                                                                          |
| 4698.1       | 4698           | NDUFA5      | NADH dehydrogenase (ubiquinone) 1 alpha subcomplex, 5, 13kDa                                                                   |                                                                                                                                          |
| 4831.1       | 4831           | NME2        | non-metastatic cells 2, protein (NM23B) expressed in                                                                           | Aliases: NM23-H2/HUGO ID: 7850/UniProt ID: P22392/                                                                                       |
| 8613.1       | 8613           | PPAP2B      | phosphatidic acid phosphatase type 2B                                                                                          | Aliases: PAP-2b/HUGO ID: 9229/UniProt ID: O14495/                                                                                        |
| 23761.1      | 23761          | PISD        | phosphatidylserine decarboxylase                                                                                               | Aliases: dJ858B16.2/HUGO ID: 8999/UniProt ID: Q9UG56/                                                                                    |
| 847.1        | 847            | CAT         | catalase                                                                                                                       | HUGO ID: 1516/UniProt ID: P04040/                                                                                                        |
| 2952.1       | 2952           | GSTT1       | glutathione S-transferase theta 1                                                                                              | HUGO ID: 4641/UniProt ID: P30711/                                                                                                        |
| 3098.1       | 3098           | HK1         | hexokinase 1                                                                                                                   | Locus type: gene with protein product, function known or inferred/HUGO ID: 4922/UniProt ID: P19367/                                      |
| 2583.1       | 2583           | GALGT       | UDP-N-acetyl-alpha-D-galactosamine:(N-acetylneuraminyl)galactosylglucosylceramide N-acetylgalactosaminyltransferase (GalNAc-T) | Aliases: beta1-4GalNAc-T/HUGO ID: 4117/UniProt ID: Q00973/                                                                               |
| 4143.1       | 4143           | MAT1A       | methionine adenosyltransferase I, alpha                                                                                        | Aliases: MAT, SAMS, MATA1, SAMS1/HUGO ID: 6903/UniProt ID: Q00266/                                                                       |
| 1589.1       | 1589           | CYP21A2     | cytochrome P450, family 21, subfamily A, polypeptide 2                                                                         | Locus type: gene with protein product, function known or inferred/Aliases: P450c21B, CA21H, CPS1, CAH1/HUGO ID: 2600/UniProt ID: P08686/ |
| 3067.1       | 3067           | HDC         | histidine decarboxylase                                                                                                        | HUGO ID: 4855/UniProt ID: P19113/                                                                                                        |
| 10588.1      | 10588          | MTHFS       | 5,10-methylenetetrahydrofolate synthetase (5-formyltetrahydrofolate cyclo-ligase)                                              | Locus type: gene with protein product, function known or inferred/Aliases: HsT19268/HUGO ID: 7437/UniProt ID: P49914/                    |
| 5320.1       | 5320           | PLA2G2A     | phospholipase A2, group IIA (platelets, synovial fluid)                                                                        | Locus type: gene with protein product, function known or inferred/HUGO ID: 9031/UniProt ID: P14555/                                      |
| 26290.1      | 26290          | GALNT8      | UDP-N-acetyl-alpha-D-galactosamine:polypeptide N-acetylgalactosaminyltransferase 8 (GalNAc-T8)                                 | Locus type: gene with protein product, function known or inferred/Aliases: GALNAc-T8/HUGO ID: 4130/UniProt ID: Q9NY28/                   |
| 116285.1     | 116285         | BUCS1       | butyryl Coenzyme A synthetase 1                                                                                                | Aliases: MACS1/HUGO ID: 18049/UniProt ID: Q96A20/MGD ID: MGI:2152200/                                                                    |
| 8703.1       | 8703           | B4GALT3     | UDP-Gal:betaGlcNAc beta 1,4-galactosyltransferase, polypeptide 3                                                               |                                                                                                                                          |
| 483.1        | 483            | ATP1B3      | ATPase, Na+/K+ transporting, beta 3 polypeptide                                                                                |                                                                                                                                          |
| 593.1        | 593            | BCKDHA      | branched chain keto acid dehydrogenase E1, alpha polypeptide (maple syrup urine disease)                                       | HUGO ID: 986/UniProt ID: P12694/                                                                                                         |

| Abbreviation | Entrez Gene ID | Gene Symbol | Putative Function                                                                                                     | Additional notes                                                                                                                                                  |
|--------------|----------------|-------------|-----------------------------------------------------------------------------------------------------------------------|-------------------------------------------------------------------------------------------------------------------------------------------------------------------|
| 1374.1       | 1374           | CPT1A       | carnitine palmitoyltransferase 1A (liver)                                                                             |                                                                                                                                                                   |
| 3101.1       | 3101           | HK3         | hexokinase 3 (white cell)                                                                                             | HUGO ID: 4925/UniProt ID: P52790/                                                                                                                                 |
| 9348.1       | 9348           | NDST3       | N-deacetylase/N-sulfotransferase (heparan glucosaminyl) 3                                                             | Locus type: gene with protein product, function known or inferred/HUGO ID: 7682/UniProt ID: Q9UP21/                                                               |
| 1152.1       | 1152           | CKB         | creatine kinase, brain                                                                                                | HUGO ID: 1991/UniProt ID: P12277/                                                                                                                                 |
| 48.1         | 48             | ACO1        | aconitase 1, soluble                                                                                                  |                                                                                                                                                                   |
| 27115.1      | 27115          | PDE7B       | phosphodiesterase 7B                                                                                                  | HUGO ID: 8792/UniProt ID: Q9NP56/                                                                                                                                 |
| 3073.1       | 3073           | HEXA        | hexosaminidase A (alpha polypeptide)                                                                                  | HUGO ID: 4878/UniProt ID: P06865/                                                                                                                                 |
| 8972.1       | 8972           | MGAM        | maltase-glucoamylase (alpha-glucoamidase)                                                                             | Aliases: MGA/HUGO ID: 7043/UniProt ID: O43451/                                                                                                                    |
| 3291.1       | 3291           | HSD11B2     | hydroxysteroid (11-beta) dehydrogenase 2                                                                              | HUGO ID: 5209/UniProt ID: P80365/                                                                                                                                 |
| 10195.1      | 10195          | ALG3        | asparagine-linked glycosylation 3 homolog (yeast, alpha-1,3-mannosyltransferase)                                      | Locus type: gene with protein product, function known or inferred/Aliases: NOT56L, Not56, CDGS4, D16Erd36e/HUGO ID: 23056/UniProt ID: Q92685/MGD ID: MGI:1098592/ |
| 2939.1       | 2939           | GSTA2       | glutathione S-transferase A2                                                                                          | Locus type: gene with protein product, function known or inferred/HUGO ID: 4627/UniProt ID: P09210/                                                               |
| 4668.1       | 4668           | NAGA        | N-acetylgalactosaminidase, alpha-                                                                                     | Aliases: D225674/HUGO ID: 7631/UniProt ID: P17050/                                                                                                                |
| 1609.1       | 1609           | DGKQ        | diacylglycerol kinase, theta 110kDa                                                                                   |                                                                                                                                                                   |
| 5207.1       | 5207           | PFKFB1      | 6-phosphofructo-2-kinase/fructose-2,6-biphosphatase 1                                                                 | HUGO ID: 8872/UniProt ID: P16118/                                                                                                                                 |
| 411.1        | 411            | ARSB        | arylsulfatase B                                                                                                       | HUGO ID: 714/UniProt ID: P15848/                                                                                                                                  |
| 6652.1       | 6652           | SORD        | sorbitol dehydrogenase                                                                                                | HUGO ID: 11184/UniProt ID: Q00796/                                                                                                                                |
| 29926.1      | 29926          | GMPPA       | GDP-mannose pyrophosphorylase A                                                                                       | transcript: NM_013335                                                                                                                                             |
| 8394.1       | 8394           | PIP5K1A     | phosphatidylinositol-4-phosphate 5-kinase, type I, alpha                                                              |                                                                                                                                                                   |
| 7385.1       | 7385           | UQCRC2      | ubiquinol-cytochrome c reductase core protein II                                                                      | HUGO ID: 12586/UniProt ID: P22695/                                                                                                                                |
| 10312.1      | 10312          | TCIRG1      | T-cell, immune regulator 1, ATPase, H+ transporting, lysosomal V0 protein a isoform 3                                 | transcript: NM_006019                                                                                                                                             |
| 496.1        | 496            | ATP4B       | ATPase, H+/K+ exchanging, beta polypeptide                                                                            | Aliases: ATP6B/HUGO ID: 820/UniProt ID: P51164/                                                                                                                   |
| 56895.1      | 56895          | AGPAT4      | 1-acylglycerol-3-phosphate O-acyltransferase 4 (lysophosphatidic acid acyltransferase, delta)                         | Locus type: gene with protein product, function known or inferred/Aliases: LPAAT-delta, d1473J16.2/HUGO ID: 20885/UniProt ID: Q9NRZ5/MGD ID: MGI:1915512/         |
| 270.1        | 270            | AMPD1       | adenosine monophosphate deaminase 1 (isoform M)                                                                       | Aliases: MAD, MADA/HUGO ID: 468/UniProt ID: P23109/                                                                                                               |
| 2938.1       | 2938           | GSTA1       | glutathione S-transferase A1                                                                                          | HUGO ID: 4626/UniProt ID: P08263/                                                                                                                                 |
| 4717.1       | 4717           | NDUFC1      | NADH dehydrogenase (ubiquinone) 1, subcomplex unknown 1, 6kDa                                                         |                                                                                                                                                                   |
| 249.1        | 249            | ALPL        | alkaline phosphatase, liver/bone/kidney                                                                               | Locus type: gene with protein product, function known or inferred/Aliases: HOPS, TNSALP/HUGO ID: 438/UniProt ID: P05186/                                          |
| 2026.1       | 2026           | ENO2        | enolase 2 (gamma, neuronal)                                                                                           | HUGO ID: 3353/UniProt ID: P09104/                                                                                                                                 |
| 3099.1       | 3099           | HK2         | hexokinase 2                                                                                                          | HUGO ID: 4923/UniProt ID: P52789/                                                                                                                                 |
| 1588.1       | 1588           | CYP19A1     | cytochrome P450, family 19, subfamily A, polypeptide 1                                                                | Locus type: gene with protein product, function known or inferred/Aliases: ARO, P-450AROM, CPV1, ARO1, CYAR/HUGO ID: 2594/UniProt ID: P11511/                     |
| 6783.1       | 6783           | SULT1E1     | sulfotransferase family 1E, estrogen-preferring, member 1                                                             | Aliases: EST/HUGO ID: 11377/UniProt ID: P49888/                                                                                                                   |
| 26301.1      | 26301          | FS          | Forssman glycolipid synthetase                                                                                        |                                                                                                                                                                   |
| 4123.1       | 4123           | MAN2C1      | mannosidase, alpha, class 2C, member 1                                                                                |                                                                                                                                                                   |
| 587.1        | 587            | BCAT2       | branched chain aminotransferase 2, mitochondrial                                                                      | Aliases: BCAM/HUGO ID: 977/UniProt ID: O15382/                                                                                                                    |
| 8813.1       | 8813           | DPM1        | dolichyl-phosphate mannosyltransferase polypeptide 1, catalytic subunit                                               |                                                                                                                                                                   |
| 189.1        | 189            | AGXT        | alanine-glyoxylate aminotransferase (oxalosis I; hyperoxaluria I; glycolicaciduria; serine-pyruvate aminotransferase) | Aliases: AGXT1/HUGO ID: 341/UniProt ID: P21549/                                                                                                                   |
| 2194.1       | 2194           | FASN        | fatty acid synthase                                                                                                   | HUGO ID: 3594/UniProt ID: P49327/                                                                                                                                 |
| 4540.1       | 4540           | MTND5       | NADH dehydrogenase 5                                                                                                  | HUGO ID: 7461/UniProt ID: P03915/                                                                                                                                 |
| 2946.1       | 2946           | GSTM2       | glutathione S-transferase M2 (muscle)                                                                                 |                                                                                                                                                                   |
| 2953.1       | 2953           | GSTT2       | glutathione S-transferase theta 2                                                                                     | HUGO ID: 4642/UniProt ID: P30712/                                                                                                                                 |
| 1346.1       | 1346           | COX7A1      | cytochrome c oxidase subunit VIIa polypeptide 1 (muscle)                                                              |                                                                                                                                                                   |
| 205.1        | 205            | AK3         | adenylate kinase 3                                                                                                    | Locus type: gene with protein product, function known or inferred/HUGO ID: 363/UniProt ID: P27144/                                                                |
| 47.1         | 47             | ACLY        | ATP citrate lyase                                                                                                     | HUGO ID: 115/UniProt ID: P53396/                                                                                                                                  |
| 7498.1       | 7498           | XDH         | xanthine dehydrogenase                                                                                                | HUGO ID: 12805/UniProt ID: P47989/                                                                                                                                |
| 1384.1       | 1384           | CRAT        | carnitine acetyltransferase                                                                                           | Aliases: CAT1/HUGO ID: 2342/UniProt ID: P43155/                                                                                                                   |
| 11253.1      | 11253          | MAN1B1      | mannosidase, alpha, class 1B, member 1                                                                                |                                                                                                                                                                   |
| 6822.1       | 6822           | SULT2A1     | sulfotransferase family, cytosolic, 2A, dehydroepiandrosterone (DHEA) -preferring, member 1                           |                                                                                                                                                                   |
| 7363.1       | 7363           | UGT2B4      | UDP glycosyltransferase 2 family, polypeptide B4                                                                      |                                                                                                                                                                   |
| 2356.1       | 2356           | FPGS        | folylpolyglutamate synthase                                                                                           | HUGO ID: 3824/UniProt ID: Q05932/                                                                                                                                 |
| 23483.1      | 23483          | TGDS        | TDP-glucose 4,6-dehydratase                                                                                           | Locus type: gene with protein product, function known or inferred/Aliases: TDPGD/HUGO ID: 20324/UniProt ID: O95455/MGD ID: MGI:1923605/                           |
| 8654.1       | 8654           | PDE5A       | phosphodiesterase 5A, cGMP-specific                                                                                   |                                                                                                                                                                   |
| 114.1        | 114            | ADCY8       | adenylate cyclase 8 (brain)                                                                                           | Aliases: HBAC1/HUGO ID: 239/UniProt ID: P40145/                                                                                                                   |
| 6799.1       | 6799           | SULT1A2     | sulfotransferase family, cytosolic, 1A, phenol-preferring, member 2                                                   |                                                                                                                                                                   |
| 635.1        | 635            | BHMT        | betaine-homocysteine methyltransferase                                                                                |                                                                                                                                                                   |



| Abbreviation | Entrez Gene ID | Gene Symbol | Putative Function                                                                                    | Additional notes                                                                                                                          |
|--------------|----------------|-------------|------------------------------------------------------------------------------------------------------|-------------------------------------------------------------------------------------------------------------------------------------------|
| 8424.1       | 8424           | BBOX1       | butyrobetaine (gamma), 2-oxoglutarate dioxygenase (gamma-butyrobetaine hydroxylase) 1                | Aliases: gamma-BBH, G-BBH, BBH/HUGO ID: 964/UniProt ID: O75936/                                                                           |
| 9955.1       | 9955           | HS3ST3A1    | heparan sulfate (glucosamine) 3-O-sulfotransferase 3A1                                               | Locus type: gene with protein product, function known or inferred/Aliases: 3OST3A1, 30ST3A1/HUGO ID: 5196/UniProt ID: Q9Y663/             |
| 435.1        | 435            | ASL         | argininosuccinate lyase                                                                              | Locus type: gene with protein product, function known or inferred/HUGO ID: 746/UniProt ID: P04424/                                        |
| 7372.1       | 7372           | UMPS        | uridine monophosphate synthetase (orotate phosphoribosyl transferase and orotidine-5'-decarboxylase) | HUGO ID: 12563/UniProt ID: P11172/                                                                                                        |
| 314.1        | 314            | AOC2        | amine oxidase, copper containing 2 (retina-specific)                                                 |                                                                                                                                           |
| 1633.1       | 1633           | DCK         | deoxycytidine kinase                                                                                 | HUGO ID: 2704/UniProt ID: P27707/                                                                                                         |
| 55276.1      | 55276          | PGM2        | phosphoglucomutase 2                                                                                 | Locus type: gene with protein product, function known or inferred/Aliases: FLJ10983/HUGO ID: 8906/UniProt ID: Q9H0P9/MGD ID: MGI:1913931/ |
| 5138.1       | 5138           | PDE2A       | phosphodiesterase 2A, cGMP-stimulated                                                                | HUGO ID: 8777/UniProt ID: O00408/                                                                                                         |
| 210.1        | 210            | ALAD        | aminolevulinic acid, delta-, dehydratase                                                             | HUGO ID: 395/UniProt ID: P13716/                                                                                                          |
| 4701.1       | 4701           | NDUFA7      | NADH dehydrogenase (ubiquinone) 1 alpha subcomplex, 7, 14.5kDa                                       | Aliases: B14.5a/HUGO ID: 7691/UniProt ID: O95182/                                                                                         |
| 2941.1       | 2941           | GSTA4       | glutathione S-transferase A4                                                                         | HUGO ID: 4629/UniProt ID: O15217/                                                                                                         |
| 7384.1       | 7384           | UQCRC1      | ubiquinol-cytochrome c reductase core protein I                                                      | Aliases: D3S3191/HUGO ID: 12585/UniProt ID: P31930/                                                                                       |
| 4714.1       | 4714           | NDUFB8      | NADH dehydrogenase (ubiquinone) 1 beta subcomplex, 8, 19kDa                                          | Aliases: ASH1/HUGO ID: 7703/UniProt ID: O95169/                                                                                           |
| 5289.1       | 5289           | PIK3C3      | phosphoinositide-3-kinase, class 3                                                                   | Aliases: Vps34/HUGO ID: 8974/UniProt ID: Q15134/                                                                                          |
| 5291.1       | 5291           | PIK3CB      | phosphoinositide-3-kinase, catalytic, beta polypeptide                                               | HUGO ID: 8976/UniProt ID: P42338/                                                                                                         |
| 645.1        | 645            | BLVRB       | biliverdin reductase B (flavin reductase (NADPH))                                                    | HUGO ID: 1063/UniProt ID: P30043/                                                                                                         |
| 5498.1       | 5498           | PPOX        | protoporphyrinogen oxidase                                                                           | Locus type: gene with protein product, function known or inferred/Aliases: PPO/HUGO ID: 9280/UniProt ID: P50336/MGD ID: MGI:104968/       |
| 5095.1       | 5095           | PCCA        | propionyl Coenzyme A carboxylase, alpha polypeptide                                                  | Locus type: gene with protein product, function known or inferred/HUGO ID: 8653/UniProt ID: P05165/                                       |
| 43.1         | 43             | ACHE        | acetylcholinesterase (YT blood group)                                                                | Locus type: gene with protein product, function known or inferred/HUGO ID: 108/UniProt ID: P22303/                                        |
| 2820.1       | 2820           | GPD2        | glycerol-3-phosphate dehydrogenase 2 (mitochondrial)                                                 | HUGO ID: 4456/UniProt ID: P43304/                                                                                                         |
| 2720.1       | 2720           | GLB1        | galactosidase, beta 1                                                                                | HUGO ID: 4298/UniProt ID: P16278/                                                                                                         |
| 5210.1       | 5210           | PFKFB4      | 6-phosphofructo-2-kinase/fructose-2,6-bisphosphatase 4                                               |                                                                                                                                           |
| 248.1        | 248            | ALPI        | alkaline phosphatase, intestinal                                                                     | HUGO ID: 437/UniProt ID: P09923/                                                                                                          |
| 2023.1       | 2023           | ENO1        | enolase 1, (alpha)                                                                                   |                                                                                                                                           |
| 7298.1       | 7298           | TYMS        | thymidylate synthetase                                                                               | Locus type: gene with protein product, function known or inferred/Aliases: Tsase, TMS, HsT422/HUGO ID: 12441/UniProt ID: P04818/          |
| 3628.1       | 3628           | INPP1       | inositol polyphosphate-1-phosphatase                                                                 | HUGO ID: 6071/UniProt ID: P49441/                                                                                                         |
| 2729.1       | 2729           | GCLC        | glutamate-cysteine ligase, catalytic subunit                                                         | Aliases: GCS/HUGO ID: 4311/UniProt ID: P48506/                                                                                            |
| 2936.1       | 2936           | GSR         | glutathione reductase (mitochondrial precursor)                                                      | HUGO ID: 4623/UniProt ID: P00390/                                                                                                         |
| 93034.1      | 93034          | NT5C1B      | 5'-nucleotidase, cytosolic 1B                                                                        | Aliases: AIRP, CN-1B/HUGO ID: 17818/UniProt ID: Q96P26/                                                                                   |
| 953.1        | 953            | ENTPD1      | ectonucleoside triphosphate diphosphohydrolase 1                                                     | Locus type: gene with protein product, function known or inferred/Aliases: NTPDase-1, ATPDase/HUGO ID: 3363/UniProt ID: P49961/           |
| 30.1         | 30             | ACAA1       | acetyl-Coenzyme A acyltransferase 1 (peroxisomal 3-oxoacyl-Coenzyme A thiolase)                      | HUGO ID: 82/UniProt ID: P09110/                                                                                                           |
| 9296.1       | 9296           | ATP6V1F     | ATPase, H+ transporting, lysosomal 14kDa, V1 subunit F                                               |                                                                                                                                           |
| 4833.1       | 4833           | NME4        | non-metastatic cells 4, protein expressed in                                                         | Locus type: gene with protein product, function known or inferred/Aliases: nm23-H4, NM23H4/HUGO ID: 7852/UniProt ID: O00746/              |
| 250.1        | 250            | ALPP        | alkaline phosphatase, placental (Regan isozyme)                                                      | HUGO ID: 439/UniProt ID: P05187/                                                                                                          |
| 4122.1       | 4122           | MAN2A2      | mannosidase, alpha, class 2A, member 2                                                               | Locus type: gene with protein product, function known or inferred/Aliases: MANA2X, HsT19662/HUGO ID: 6825/UniProt ID: P49641/             |
| 6898.1       | 6898           | TAT         | tyrosine aminotransferase                                                                            | HUGO ID: 11573/UniProt ID: P17735/                                                                                                        |
| 586.1        | 586            | BCAT1       | branched chain aminotransferase 1, cytosolic                                                         | HUGO ID: 976/UniProt ID: P54687/                                                                                                          |
| 509.1        | 509            | ATP5C1      | ATP synthase, H+ transporting, mitochondrial F1 complex, gamma polypeptide 1                         | Variant 1: This variant represents the longer transcript, and encodes the longer isoform (L), also known as a liver type isoform.         |
| 2954.1       | 2954           | GSTZ1       | glutathione transferase zeta 1 (maleylacetoacetate isomerase)                                        |                                                                                                                                           |
| 56894.1      | 56894          | AGPAT3      | 1-acylglycerol-3-phosphate O-acyltransferase 3                                                       | Aliases: LPAAT-gamma/HUGO ID: 326/UniProt ID: Q9NRZ7/                                                                                     |
| 22928.1      | 22928          | SEPHS2      | selenophosphate synthetase 2                                                                         | Locus type: gene with protein product, function known or inferred/Aliases: SPS2/HUGO ID: 19686/UniProt ID: Q99611/MGD ID: MGI:108388/     |
| 2982.1       | 2982           | GUCY1A3     | guanylate cyclase 1, soluble, alpha 3                                                                | Aliases: GC-SA3/HUGO ID: 4685/UniProt ID: Q02108/                                                                                         |
| 53630.1      | 53630          | BCDO1       | beta-carotene 15, 15'-dioxygenase                                                                    |                                                                                                                                           |
| 4245.1       | 4245           | MGAT1       | mannosyl (alpha-1,3-)-glycoprotein beta-1,2-N-acetylglucosaminyltransferase                          | Aliases: GNT-1, GLCNAC-TI/HUGO ID: 7044/UniProt ID: P26572/                                                                               |
| 4704.1       | 4704           | NDUFA9      | NADH dehydrogenase (ubiquinone) 1 alpha subcomplex, 9, 39kDa                                         | Locus type: gene with protein product, function known or inferred/HUGO ID: 7693/UniProt ID: Q16795/                                       |
| 5198.1       | 5198           | PFAS        | phosphoribosylformylglycinamide synthase (FGAR amidotransferase)                                     | Aliases: PURL, FGARAT, KIAA0361/HUGO ID: 8863/UniProt ID: O15067/                                                                         |

| Abbreviation | Entrez Gene ID | Gene Symbol | Putative Function                                                                                               | Additional notes                                                                                                           |
|--------------|----------------|-------------|-----------------------------------------------------------------------------------------------------------------|----------------------------------------------------------------------------------------------------------------------------|
| 8050.1       | 8050           | PDHX        | pyruvate dehydrogenase complex, component X                                                                     |                                                                                                                            |
| 1644.1       | 1644           | DDC         | dopa decarboxylase (aromatic L-amino acid decarboxylase)                                                        | Aliases: AADC/HUGO ID: 2719/UniProt ID: P20711/                                                                            |
| 115.1        | 115            | ADCY9       | adenylate cyclase 9                                                                                             | HUGO ID: 240/UniProt ID: O60503/                                                                                           |
| 8705.1       | 8705           | B3GALT4     | UDP-Gal:betaGlcNAc beta 1,3-galactosyltransferase, polypeptide 4                                                | Aliases: beta3Gal-T4, GalT4/HUGO ID: 919/UniProt ID: O96024/                                                               |
| 1120.1       | 1120           | CHKL        | choline/ethanolamine kinase                                                                                     | *PubMed                                                                                                                    |
| 6821.1       | 6821           | SUOX        | sulfite oxidase                                                                                                 | Locus type: gene with protein product, function known or inferred/HUGO ID: 11460/UniProt ID: P51687/                       |
| 2974.1       | 2974           | GUCY1B2     | guanylate cyclase 1, soluble, beta 2                                                                            |                                                                                                                            |
| 1562.1       | 1562           | CYP2C18     | cytochrome P450, family 2, subfamily C, polypeptide 18                                                          |                                                                                                                            |
| 5322.1       | 5322           | PLA2G5      | phospholipase A2, group V                                                                                       |                                                                                                                            |
| 5236.1       | 5236           | PGM1        | phosphoglucomutase 1                                                                                            |                                                                                                                            |
| 4125.1       | 4125           | MAN2B1      | mannosidase, alpha, class 2B, member 1                                                                          | Aliases: LAMAN/HUGO ID: 6826/UniProt ID: O00754/                                                                           |
| 11185.1      | 11185          | INMT        | indolethylamine N-methyltransferase                                                                             | HUGO ID: 6069/UniProt ID: O95050/                                                                                          |
| 7371.1       | 7371           | UCK2        | uridine-cytidine kinase 2                                                                                       | Locus type: gene with protein product, function known or inferred/HUGO ID: 12562/UniProt ID: Q9BZX2/MGD ID: MGI:98904/     |
| 2687.1       | 2687           | GGTLA1      | gamma-glutamyltransferase-like activity 1                                                                       | Aliases: GGT-REL/HUGO ID: 4260/UniProt ID: P36269/                                                                         |
| 4519.1       | 4519           | MTCYB       | cytochrome b                                                                                                    | HUGO ID: 7427/UniProt ID: P00156/                                                                                          |
| 7360.1       | 7360           | UGP2        | UDP-glucose pyrophosphorylase 2                                                                                 | HUGO ID: 12527/UniProt ID: Q16851/                                                                                         |
| 64132.1      | 64132          | XYLT2       | xylosyltransferase II                                                                                           | Aliases: XT-II/HUGO ID: 15517/UniProt ID: Q86V00/                                                                          |
| 8876.1       | 8876           | VNN1        | vanin 1                                                                                                         | Aliases: Tiff66/HUGO ID: 12705/UniProt ID: O95497/                                                                         |
| 31.1         | 31             | ACACA       | acetyl-Coenzyme A carboxylase alpha                                                                             | Aliases: ACC1/HUGO ID: 84/UniProt ID: Q13085/                                                                              |
| 383.1        | 383            | ARG1        | arginase, liver                                                                                                 | HUGO ID: 663/UniProt ID: P05089/                                                                                           |
| 2944.1       | 2944           | GSTM1       | glutathione S-transferase M1                                                                                    | Locus type: gene with protein product, function known or inferred/Aliases: MU, H-B, GST1/HUGO ID: 4632/UniProt ID: P09488/ |
| 6120.1       | 6120           | RPE         | ribulose-5-phosphate-3-epimerase                                                                                | HUGO ID: 10293/UniProt ID: Q96AT9/                                                                                         |
| 9563.1       | 9563           | H6PD        | hexose-6-phosphate dehydrogenase (glucose 1-dehydrogenase)                                                      | Aliases: HGNC:4225/HUGO ID: 4795/UniProt ID: O95479/                                                                       |
| 7173.1       | 7173           | TPO         | thyroid peroxidase                                                                                              | HUGO ID: 12015/UniProt ID: P07202/                                                                                         |
| 2821.1       | 2821           | GPI         | glucose phosphate isomerase                                                                                     |                                                                                                                            |
| 10840.1      | 10840          | FTHFD       | formyltetrahydrofolate dehydrogenase                                                                            | HUGO ID: 3978/UniProt ID: O75891/                                                                                          |
| 8525.1       | 8525           | DGKZ        | diacylglycerol kinase, zeta 104kDa                                                                              | Aliases: DAGK5, hDGKzeta/HUGO ID: 2857/UniProt ID: Q13574/                                                                 |
| 5240.1       | 5240           | PGP         | phosphoglycolate phosphatase                                                                                    | HUGO ID: 8909/                                                                                                             |
| 10331.1      | 10331          | B3GNT3      | UDP-GlcNAc:betaGal beta-1,3-N-acetylglucosaminyltransferase 3                                                   |                                                                                                                            |
| 217.1        | 217            | ALDH2       | aldehyde dehydrogenase 2 family (mitochondrial)                                                                 | HUGO ID: 404/UniProt ID: P05091/                                                                                           |
| 6483.1       | 6483           | SIAT4B      | sialyltransferase 4B (beta-galactoside alpha-2,3-sialyltransferase)                                             |                                                                                                                            |
| 2655.1       | 2655           | GCTG        | gamma-glutamylcyclotransferase                                                                                  | Locus type: gene with protein product, function known or inferred/Aliases: Ggc/HUGO ID: 4210/MGD ID: MGI:95700/            |
| 7299.1       | 7299           | TYR         | tyrosinase (oculocutaneous albinism IA)                                                                         | Aliases: OCA1A/HUGO ID: 12442/UniProt ID: P14679/                                                                          |
| 5290.1       | 5290           | PIK3CA      | phosphoinositide-3-kinase, catalytic, alpha polypeptide                                                         | HUGO ID: 8975/UniProt ID: P42336/                                                                                          |
| 5148.1       | 5148           | PDE6G       | phosphodiesterase 6G, cGMP-specific, rod, gamma                                                                 | HUGO ID: 8789/UniProt ID: P18545/                                                                                          |
| 126.1        | 126            | ADH1C       | alcohol dehydrogenase 1C (class I), gamma polypeptide                                                           | Locus type: gene with protein product, function known or inferred/HUGO ID: 251/UniProt ID: P00326/                         |
| 4715.1       | 4715           | NDUFB9      | NADH dehydrogenase (ubiquinone) 1 beta subcomplex, 9, 22kDa                                                     | Locus type: gene with protein product, function known or inferred/Aliases: B22, UQOR22/HUGO ID: 7704/UniProt ID: Q9Y6M9/   |
| 763.1        | 763            | CA5A        | carbonic anhydrase VA, mitochondrial                                                                            |                                                                                                                            |
| 56922.1      | 56922          | MCCC1       | methylcrotonoyl-Coenzyme A carboxylase 1 (alpha)                                                                | Aliases: MCCA/HUGO ID: 6936/UniProt ID: Q96RQ3/                                                                            |
| 1610.1       | 1610           | DAO         | D-amino-acid oxidase                                                                                            |                                                                                                                            |
| 6482.1       | 6482           | SIAT4A      | sialyltransferase 4A (beta-galactoside alpha-2,3-sialyltransferase)                                             | transcript: NM_003033                                                                                                      |
| 5223.1       | 5223           | PGAM1       | phosphoglycerate mutase 1 (brain)                                                                               | Locus type: gene with protein product, function known or inferred/HUGO ID: 8888/UniProt ID: P18669/                        |
| 8612.1       | 8612           | PPAP2C      | phosphatidic acid phosphatase type 2C                                                                           |                                                                                                                            |
| 1376.1       | 1376           | CPT2        | carnitine palmitoyltransferase II                                                                               | Locus type: gene with protein product, function known or inferred/Aliases: CPTASE/HUGO ID: 2330/UniProt ID: P23786/        |
| 2678.1       | 2678           | GGT1        | gamma-glutamyltransferase 1                                                                                     | Aliases: D228672, D228732, CD224/HUGO ID: 4250/UniProt ID: P19440/                                                         |
| 445.1        | 445            | ASS         | argininosuccinate synthetase                                                                                    |                                                                                                                            |
| 4199.1       | 4199           | ME1         | malic enzyme 1, NADP(+)-dependent, cytosolic                                                                    | HUGO ID: 6983/UniProt ID: P48163/                                                                                          |
| 56474.1      | 56474          | CTPS2       | CTP synthase II                                                                                                 | Locus type: gene with protein product, function known or inferred/HUGO ID: 2520/UniProt ID: Q9H809/                        |
| 2224.1       | 2224           | FDPS        | farnesyl diphosphate synthase (farnesyl pyrophosphate synthetase, dimethylallyltransferase, geranyltransferase) | Locus type: gene with protein product, function known or inferred/HUGO ID: 3631/UniProt ID: P14324/                        |
| 2643.1       | 2643           | GCHI        | GTP cyclohydrolase 1 (dopa-responsive dystonia)                                                                 |                                                                                                                            |
| 8879.1       | 8879           | SGPL1       | sphingosine-1-phosphate lyase 1                                                                                 | Aliases: SPL/HUGO ID: 10817/UniProt ID: Q9ULG8/                                                                            |
| 226.1        | 226            | ALDOA       | aldolase A, fructose-bisphosphate                                                                               | HUGO ID: 414/UniProt ID: P04075/                                                                                           |
| 6476.1       | 6476           | SI          | sucrase-isomaltase                                                                                              |                                                                                                                            |

| Abbreviation | Entrez Gene ID | Gene Symbol | Putative Function                                                                      | Additional notes                                                                                                                |
|--------------|----------------|-------------|----------------------------------------------------------------------------------------|---------------------------------------------------------------------------------------------------------------------------------|
| 6817.1       | 6817           | SULT1A1     | sulfotransferase family, cytosolic, 1A, phenol-preferring, member 1                    |                                                                                                                                 |
| 22929.1      | 22929          | SEPHS1      | selenophosphate synthetase 1                                                           | Locus type: gene with protein product, function known or inferred/Aliases: SPS, SPS1/HUGO ID: 19685/UniProt ID: P49903/         |
| 427.1        | 427            | ASAH1       | N-acylsphingosine amidohydrolase (acid ceramidase) 1                                   |                                                                                                                                 |
| 2645.1       | 2645           | GCK         | glucokinase (hexokinase 4, maturity onset diabetes of the young 2)                     | transcript: NM_000162                                                                                                           |
| 5331.1       | 5331           | PLCB3       | phospholipase C, beta 3 (phosphatidylinositol-specific)                                | HUGO ID: 9056/UniProt ID: Q01970/                                                                                               |
| 4597.1       | 4597           | MVD         | mevalonate (diphospho) decarboxylase                                                   | Locus type: gene with protein product, function known or inferred/Aliases: MPD/HUGO ID: 7529/UniProt ID: P53602/                |
| 3418.1       | 3418           | IDH2        | isocitrate dehydrogenase 2 (NADP+), mitochondrial                                      | HUGO ID: 5383/UniProt ID: P48735/                                                                                               |
| 5740.1       | 5740           | PTGIS       | prostaglandin I2 (prostaglyclin) synthase                                              | Aliases: PGIS, CYP8/HUGO ID: 9603/UniProt ID: Q16647/                                                                           |
| 32.1         | 32             | ACACB       | acetyl-Coenzyme A carboxylase beta                                                     | Locus type: gene with protein product, function known or inferred/Aliases: HACCC275, ACC2, ACCB/HUGO ID: 85/UniProt ID: O00763/ |
| 4124.1       | 4124           | MAN2A1      | mannosidase, alpha, class 2A, member 1                                                 | HUGO ID: 6824/UniProt ID: Q16706/                                                                                               |
| 23236.1      | 23236          | PLCB1       | phospholipase C, beta 1 (phosphoinositide-specific)                                    | transcript: NM_015192                                                                                                           |
| 5631.1       | 5631           | PRPS1       | phosphoribosyl pyrophosphate synthetase 1                                              | Aliases: PRS 1/HUGO ID: 9462/UniProt ID: P09329/                                                                                |
| 3706.1       | 3706           | ITPKA       | inositol 1,4,5-trisphosphate 3-kinase A                                                | HUGO ID: 6178/UniProt ID: P23677/                                                                                               |
| 2184.1       | 2184           | FAH         | fumarylacetoacetate hydrolase (fumarylacetoacetase)                                    |                                                                                                                                 |
| 26227.1      | 26227          | PHGDH       | phosphoglycerate dehydrogenase                                                         | Locus type: gene with protein product, function known or inferred/Aliases: SERA, PGDH, PDG/HUGO ID: 8923/UniProt ID: O43175/    |
| 5315.1       | 5315           | PKM2        | pyruvate kinase, muscle                                                                | Aliases: THBP1, OIP3/HUGO ID: 9021/UniProt ID: P14618/                                                                          |
| 5152.1       | 5152           | PDE9A       | phosphodiesterase 9A                                                                   | HUGO ID: 8795/UniProt ID: O76083/                                                                                               |
| 10678.1      | 10678          | B3GNT1      | UDP-GlcNAc:betaGal beta-1,3-N-acetylglucosaminyltransferase 1                          | transcript info: NM_006577                                                                                                      |
| 2819.1       | 2819           | GPD1        | glycerol-3-phosphate dehydrogenase 1 (soluble)                                         | HUGO ID: 4455/UniProt ID: P21695/                                                                                               |
| 5019.1       | 5019           | OXCT1       | 3-oxoacid CoA transferase 1                                                            | Locus type: gene with protein product, function known or inferred/Aliases: SCOT/HUGO ID: 8527/UniProt ID: P55809/               |
| 7386.1       | 7386           | UQCRCF1     | ubiquinol-cytochrome c reductase, Rieske iron-sulfur polypeptide 1                     | Aliases: RIS1/HUGO ID: 12587/UniProt ID: P47985/                                                                                |
| 2717.1       | 2717           | GLA         | galactosidase, alpha                                                                   | Aliases: GALA/HUGO ID: 4296/UniProt ID: P06280/                                                                                 |
| 9953.1       | 9953           | HS3ST3B1    | heparan sulfate (glucosamine) 3-O-sulfotransferase 3B1                                 | Locus type: gene with protein product, function known or inferred/Aliases: 3OST3B1, 3OST3B1/HUGO ID: 5198/UniProt ID: Q9Y662/   |
| 1807.1       | 1807           | DPYS        | dihydropyrimidinase                                                                    | Locus type: gene with protein product, function known or inferred/Aliases: DHPase/HUGO ID: 3013/UniProt ID: Q14117/             |
| 275.1        | 275            | AMT         | aminomethyltransferase (glycine cleavage system protein T)                             | HUGO ID: 473/UniProt ID: P48728/                                                                                                |
| 5406.1       | 5406           | PNLIP       | pancreatic lipase                                                                      | Locus type: gene with protein product, function known or inferred/HUGO ID: 9155/UniProt ID: P16233/                             |
| 476.1        | 476            | ATP1A1      | ATPase, Na+/K+ transporting, alpha 1 polypeptide                                       | HUGO ID: 799/UniProt ID: P05023/                                                                                                |
| 125.1        | 125            | ADH1B       | alcohol dehydrogenase IB (class I), beta polypeptide                                   | Locus type: gene with protein product, function known or inferred/HUGO ID: 250/UniProt ID: P00325/                              |
| 27232.1      | 27232          | GNMT        | glycine N-methyltransferase                                                            |                                                                                                                                 |
| 4190.1       | 4190           | MDH1        | malate dehydrogenase 1, NAD (soluble)                                                  | HUGO ID: 6970/UniProt ID: P40925/                                                                                               |
| 4723.1       | 4723           | NDUFV1      | NADH dehydrogenase (ubiquinone) flavoprotein 1, 51kDa                                  | HUGO ID: 7716/UniProt ID: P49821/                                                                                               |
| 766.1        | 766            | CA7         | carbonic anhydrase VII                                                                 | HUGO ID: 1381/UniProt ID: P43166/                                                                                               |
| 6697.1       | 6697           | SPR         | sepiapterin reductase (7,8-dihydrobiopterin:NADP+ oxidoreductase)                      | HUGO ID: 11257/UniProt ID: P35270/                                                                                              |
| 2998.1       | 2998           | GYS2        | glycogen synthase 2 (liver)                                                            | HUGO ID: 4707/UniProt ID: P54840/                                                                                               |
| 11285.1      | 11285          | B4GALT7     | xylosylprotein beta 1,4-galactosyltransferase, polypeptide 7 (galactosyltransferase I) | *PubMed                                                                                                                         |
| 8528.1       | 8528           | DDO         | D-aspartate oxidase                                                                    | Locus type: gene with protein product, function known or inferred/HUGO ID: 2727/UniProt ID: Q99489/                             |
| 5143.1       | 5143           | PDE4C       | phosphodiesterase 4C, cAMP-specific (phosphodiesterase E1) duncce homolog, Drosophila  | HUGO ID: 8782/UniProt ID: Q08493/                                                                                               |
| 2806.1       | 2806           | GOT2        | glutamic-oxaloacetic transaminase 2, mitochondrial (aspartate aminotransferase 2)      | HUGO ID: 4433/UniProt ID: P00505/                                                                                               |
| 3707.1       | 3707           | ITPKB       | inositol 1,4,5-trisphosphate 3-kinase B                                                |                                                                                                                                 |
| 8509.1       | 8509           | NDST2       | N-deacetylase/N-sulfotransferase (heparan glucosaminyl) 2                              | Aliases: NST2, HSST2/HUGO ID: 7681/UniProt ID: P52849/                                                                          |
| 5287.1       | 5287           | PIK3C2B     | phosphoinositide-3-kinase, class 2, beta polypeptide                                   |                                                                                                                                 |
| 2679.1       | 2679           | GGT2        | gamma-glutamyltransferase 2                                                            | Locus type: gene with protein product, function known or inferred/HUGO ID: 4251/UniProt ID: P36268/                             |
| 1329.1       | 1329           | COX5B       | cytochrome c oxidase subunit Vb                                                        | HUGO ID: 2269/UniProt ID: P10606/                                                                                               |
| 55907.1      | 55907          | CMAS        | cytidine monophosphate N-acetylneuraminic acid synthetase                              | *PubMed                                                                                                                         |
| 10020.1      | 10020          | GNE         | UDP-N-acetylglucosamine-2-epimerase/N-acetylmannosamine kinase                         |                                                                                                                                 |
| 2947.1       | 2947           | GSTM3       | glutathione S-transferase M3 (brain)                                                   | Locus type: gene with protein product, function known or inferred/Aliases: GST5/HUGO ID: 4635/UniProt ID: P21266/               |
| 276.1        | 276            | AMY1A       | amylase, alpha 1A; salivary                                                            | HUGO ID: 474/UniProt ID: P04745/                                                                                                |
| 5373.1       | 5373           | PMM2        | phosphomannomutase 2                                                                   | Locus type: gene with protein product, function known or inferred/Aliases: CDGS/HUGO ID: 9115/UniProt ID: O15305/               |

| Abbreviation | Entrez Gene ID | Gene Symbol | Putative Function                                                                                                     | Additional notes                                                                                                                             |
|--------------|----------------|-------------|-----------------------------------------------------------------------------------------------------------------------|----------------------------------------------------------------------------------------------------------------------------------------------|
| 4259.1       | 4259           | MGST3       | microsomal glutathione S-transferase 3                                                                                | HUGO ID: 7064/UniProt ID: O14880/                                                                                                            |
| 51703.1      | 51703          | ACSL5       | acyl-CoA synthetase long-chain family member 5                                                                        | Locus type: gene with protein product, function known or inferred/Aliases: ACS5, ACS2/HUGO ID: 16526/UniProt ID: Q9ULC5/MGD ID: MGI:1919129/ |
| 108.1        | 108            | ADCY2       | adenylate cyclase 2 (brain)                                                                                           | Locus type: gene with protein product, function known or inferred/Aliases: HBAC2, KIAA1060/HUGO ID: 233/UniProt ID: Q08462/                  |
| 2879.1       | 2879           | GPX4        | glutathione peroxidase 4 (phospholipid hydroperoxidase)                                                               | HUGO ID: 4556/UniProt ID: P36969/                                                                                                            |
| 3636.1       | 3636           | INPPL1      | inositol polyphosphate phosphatase-like 1                                                                             | HUGO ID: 6080/UniProt ID: O15357/                                                                                                            |
| 5293.1       | 5293           | PIK3CD      | phosphoinositide-3-kinase, catalytic, delta polypeptide                                                               | *PubMed                                                                                                                                      |
| 53947.1      | 53947          | A4GALT      | alpha 1,4-galactosyltransferase                                                                                       | Locus type: gene with protein product, function known or inferred/Aliases: A14GALT, HGNC:8531/HUGO ID: 18149/UniProt ID: Q9NPC4/             |
| 5330.1       | 5330           | PLCB2       | phospholipase C, beta 2                                                                                               |                                                                                                                                              |
| 10558.1      | 10558          | SPTLC1      | serine palmitoyltransferase, long chain base subunit 1                                                                | Aliases: LCB1, SPTI, HGNC:5230, HSNAN1/HUGO ID: 11277/UniProt ID: O15269/                                                                    |
| 5230.1       | 5230           | PGK1        | phosphoglycerate kinase 1                                                                                             |                                                                                                                                              |
| 1339.1       | 1339           | COX6A2      | cytochrome c oxidase subunit VIa polypeptide 2                                                                        | HUGO ID: 2279/UniProt ID: Q02221/                                                                                                            |
| 2739.1       | 2739           | GLO1        | glyoxalase I                                                                                                          |                                                                                                                                              |
| 2548.1       | 2548           | GAA         | glucosidase, alpha; acid (Pompe disease, glycogen storage disease type II)                                            | HUGO ID: 4065/UniProt ID: P10253/                                                                                                            |
| 4357.1       | 4357           | MPST        | mercaptopyruvate sulfurtransferase                                                                                    | Aliases: MST/HUGO ID: 7223/UniProt ID: P25325/                                                                                               |
| 33.1         | 33             | ACADL       | acyl-Coenzyme A dehydrogenase, long chain                                                                             | Locus type: gene with protein product, function known or inferred/Aliases: LCAD, ACAD4/HUGO ID: 88/UniProt ID: P28330/                       |
| 8398.1       | 8398           | PLA2G6      | phospholipase A2, group VI (cytosolic, calcium-independent)                                                           | Aliases: iPLA2/HUGO ID: 9039/UniProt ID: O60733/                                                                                             |
| 2523.1       | 2523           | FUT1        | fucosyltransferase 1 (galactoside 2-alpha-L-fucosyltransferase)                                                       | HUGO ID: 4012/UniProt ID: P19526/                                                                                                            |
| 3419.1       | 3419           | IDH3A       | isocitrate dehydrogenase 3 (NAD+) alpha                                                                               | HUGO ID: 5384/UniProt ID: P50213/                                                                                                            |
| 4830.1       | 4830           | NME1        | non-metastatic cells 1, protein (NM23A) expressed in                                                                  | Aliases: NM23, NM23-H1/HUGO ID: 7849/UniProt ID: P15531/                                                                                     |
| 219.1        | 219            | ALDH1B1     | aldehyde dehydrogenase 1 family, member B1                                                                            | Aliases: ALDHX/HUGO ID: 407/UniProt ID: P30837/                                                                                              |
| 7389.1       | 7389           | UROD        | uroporphyrinogen decarboxylase                                                                                        |                                                                                                                                              |
| 5351.1       | 5351           | PLOD        | procollagen-lysine, 2-oxoglutarate 5-dioxygenase (lysine hydroxylase, Ehlers-Danlos syndrome type VI)                 | transcript: NM_000302                                                                                                                        |
| 5153.1       | 5153           | PDE1B       | phosphodiesterase 1B, calmodulin-dependent                                                                            |                                                                                                                                              |
| 5860.1       | 5860           | QDPR        | quinoid dihydropteridine reductase                                                                                    | Aliases: DHPR/HUGO ID: 9752/UniProt ID: P09417/                                                                                              |
| 5338.1       | 5338           | PLD2        | phospholipase D2                                                                                                      |                                                                                                                                              |
| 5096.1       | 5096           | PCCB        | propionyl Coenzyme A carboxylase, beta polypeptide                                                                    | HUGO ID: 8654/UniProt ID: P05166/                                                                                                            |
| 178.1        | 178            | AGL         | amylase-1, 6-glucosidase, 4-alpha-glucanotransferase (glycogen debranching enzyme, glycogen storage disease type III) | Locus type: gene with protein product, function known or inferred/HUGO ID: 321/UniProt ID: P35573/MGD ID: MGI:1924809/                       |
| 10841.1      | 10841          | FTCD        | formiminotransferase cyclodeaminase                                                                                   | *PubMed                                                                                                                                      |
| 2590.1       | 2590           | GALNT2      | UDP-N-acetyl-alpha-D-galactosamine:polypeptide N-acetylgalactosaminyltransferase 2 (GalNAc-T2)                        |                                                                                                                                              |
| 3029.1       | 3029           | HAGH        | hydroxyacyl glutathione hydrolase                                                                                     |                                                                                                                                              |
| 10400.1      | 10400          | PEMT        | phosphatidylethanolamine N-methyltransferase                                                                          | Aliases: PEMPT, PEMT2/HUGO ID: 8830/UniProt ID: Q9UBM1/                                                                                      |
| 2530.1       | 2530           | FUT8        | fucosyltransferase 8 (alpha (1,6) fucosyltransferase)                                                                 | HUGO ID: 4019/UniProt ID: Q9BYC5/                                                                                                            |
| 644.1        | 644            | BLVRA       | biliverdin reductase A                                                                                                | Locus type: gene with protein product, function known or inferred/HUGO ID: 1062/UniProt ID: P53004/                                          |
| 1103.1       | 1103           | CHAT        | choline acetyltransferase                                                                                             | Locus type: gene with protein product, function known or inferred/HUGO ID: 1912/UniProt ID: P28329/                                          |
| 4508.1       | 4508           | MTATP6      | ATP synthase 6                                                                                                        | HUGO ID: 7414/UniProt ID: P00846/                                                                                                            |
| 686.1        | 686            | BDT         | biotinidase                                                                                                           | HUGO ID: 1122/UniProt ID: P43251/                                                                                                            |
| 1719.1       | 1719           | DHFR        | dihydrofolate reductase                                                                                               | HUGO ID: 2861/UniProt ID: P00374/                                                                                                            |
| 523.1        | 523            | ATP6V1A     | ATPase, H+ transporting, lysosomal 70kDa, V1 subunit A                                                                | Aliases: Vma1, VA68/HUGO ID: 851/UniProt ID: P38606/                                                                                         |
| 6480.1       | 6480           | SIAT1       | sialyltransferase 1 (beta-galactoside alpha-2,6-sialyltransferase)                                                    | Aliases: CD75, ST6Gal I/HUGO ID: 10860/UniProt ID: P15907/                                                                                   |
| 5407.1       | 5407           | PNLIPRP1    | pancreatic lipase-related protein 1                                                                                   | Locus type: gene with protein product, function known or inferred/Aliases: PLRP1/HUGO ID: 9156/UniProt ID: P54315/                           |
| 4707.1       | 4707           | NDUFB1      | NADH dehydrogenase (ubiquinone) 1 beta subcomplex, 1, 7kDa                                                            | Aliases: MNLL/HUGO ID: 7695/UniProt ID: O75438/                                                                                              |
| 443.1        | 443            | ASPA        | aspartoacylase (aminoacylase 2, Canavan disease)                                                                      | Aliases: ASP/HUGO ID: 756/UniProt ID: P45381/                                                                                                |
| 8527.1       | 8527           | DGKD        | diacylglycerol kinase, delta 130kDa                                                                                   | Aliases: KIAA0145, DGKdelta/HUGO ID: 2851/UniProt ID: Q16760/                                                                                |
| 5286.1       | 5286           | PIK3C2A     | phosphoinositide-3-kinase, class 2, alpha polypeptide                                                                 | Aliases: PI3K-C2alpha/HUGO ID: 8971/UniProt ID: O00443/                                                                                      |
| 8733.1       | 8733           | GPAA1       | GPAA1P anchor attachment protein 1 homolog (yeast)                                                                    | Aliases: GAA1, hGAA1/HUGO ID: 4446/UniProt ID: O43292/                                                                                       |
| 3158.1       | 3158           | HMGCS2      | 3-hydroxy-3-methylglutaryl-Coenzyme A synthase 2 (mitochondrial)                                                      |                                                                                                                                              |
| 10975.1      | 10975          | UQCR        | ubiquinol-cytochrome c reductase (6.4kD) subunit                                                                      | transcript: NM_006830                                                                                                                        |
| 109.1        | 109            | ADCY3       | adenylate cyclase 3                                                                                                   | HUGO ID: 234/UniProt ID: O60266/                                                                                                             |

| Abbreviation | Entrez Gene ID | Gene Symbol | Putative Function                                                                                                                                         | Additional notes                                                                                                                                     |
|--------------|----------------|-------------|-----------------------------------------------------------------------------------------------------------------------------------------------------------|------------------------------------------------------------------------------------------------------------------------------------------------------|
| 5142.1       | 5142           | PDE4B       | phosphodiesterase 4B, cAMP-specific (phosphodiesterase E4)<br>dunce homolog, Drosophila)                                                                  | Locus type: gene with protein product, function known or inferred/HUGO ID: 8781/UniProt ID: Q07343/                                                  |
| 2584.1       | 2584           | GALK1       | galactokinase 1                                                                                                                                           | HUGO ID: 4118/UniProt ID: P51570/                                                                                                                    |
| 5372.1       | 5372           | PMM1        | phosphomannomutase 1                                                                                                                                      | HUGO ID: 9114/UniProt ID: Q92871/                                                                                                                    |
| 128.1        | 128            | ADH5        | alcohol dehydrogenase 5 (class III), chi polypeptide                                                                                                      | Locus type: gene with protein product, function known or inferred/Aliases: ADH-3, HGNC:3630, ADHX/HUGO ID: 253/UniProt ID: P11766/MGD ID: MGI:87929/ |
| 2203.1       | 2203           | FBP1        | fructose-1,6-bisphosphatase 1                                                                                                                             | HUGO ID: 3606/UniProt ID: P09467/                                                                                                                    |
| 1629.1       | 1629           | DBT         | dihydroliipoamide branched chain transacylase (E2 component of branched chain keto acid dehydrogenase complex; maple syrup urine disease)                 |                                                                                                                                                      |
| 1577.1       | 1577           | CYP3A5      | cytochrome P450, family 3, subfamily A, polypeptide 5                                                                                                     | Locus type: gene with protein product, function known or inferred/Aliases: PCN3, P450PCN3, CP35/HUGO ID: 2638/UniProt ID: P20815/                    |
| 1786.1       | 1786           | DNMT1       | DNA (cytosine-5-)-methyltransferase 1                                                                                                                     | Locus type: gene with protein product, function known or inferred/Aliases: MCMT, CXXC9/HUGO ID: 2976/UniProt ID: P26358/MGD ID: MGI:94912/           |
| 1582.1       | 1582           | CYP8B1      | cytochrome P450, family 8, subfamily B, polypeptide 1                                                                                                     | Locus type: gene with protein product, function known or inferred/Aliases: CYP12/HUGO ID: 2653/UniProt ID: Q9UNU6/                                   |
| 10993.1      | 10993          | SDS         | serine dehydratase                                                                                                                                        | Locus type: gene with protein product, function known or inferred/Aliases: SDH/HUGO ID: 10691/UniProt ID: P20132/                                    |
| 10317.1      | 10317          | B3GALT5     | UDP-Gal:betaGlcNAc beta 1,3-galactosyltransferase, polypeptide 5                                                                                          | Aliases: beta3Gal-T5/HUGO ID: 920/UniProt ID: Q9Y2C3/                                                                                                |
| 4258.1       | 4258           | MGST2       | microsomal glutathione S-transferase 2                                                                                                                    | Aliases: MGST-II/HUGO ID: 7063/UniProt ID: Q99735/                                                                                                   |
| 539.1        | 539            | ATP5O       | ATP synthase, H+ transporting, mitochondrial F1 complex, O subunit (oligomycin sensitivity conferring protein)                                            | Aliases: OSCP, ATPO/HUGO ID: 850/UniProt ID: P48047/                                                                                                 |
| 10476.1      | 10476          | ATP5H       | ATP synthase, H+ transporting, mitochondrial F0 complex, subunit d                                                                                        | Locus type: gene with protein product, function known or inferred/Aliases: ATPQ, ATP5JD/HUGO ID: 845/UniProt ID: O75947/MGD ID: MGI:1918929/         |
| 132.1        | 132            | ADK         | adenosine kinase                                                                                                                                          | Locus type: gene with protein product, function known or inferred/Aliases: AK/HUGO ID: 257/UniProt ID: P55263/                                       |
| 4705.1       | 4705           | NDUFA10     | NADH dehydrogenase (ubiquinone) 1 alpha subcomplex, 10, 42kDa                                                                                             |                                                                                                                                                      |
| 5333.1       | 5333           | PLCD1       | phospholipase C, delta 1                                                                                                                                  | HUGO ID: 9060/UniProt ID: P51178/                                                                                                                    |
| 6391.1       | 6391           | SDHC        | succinate dehydrogenase complex, subunit C, integral membrane protein, 15kDa                                                                              |                                                                                                                                                      |
| 3030.1       | 3030           | HADHA       | hydroxyacyl-Coenzyme A dehydrogenase/3-ketoacyl-Coenzyme A thiolase/enoyl-Coenzyme A hydratase (trifunctional protein), alpha subunit                     |                                                                                                                                                      |
| 23556.1      | 23556          | PIGN        | phosphatidylinositol glycan, class N                                                                                                                      | transcript: NM_012327                                                                                                                                |
| 768.1        | 768            | CA9         | carbonic anhydrase IX                                                                                                                                     |                                                                                                                                                      |
| 6723.1       | 6723           | SRM         | spermidine synthase                                                                                                                                       | Locus type: gene with protein product, function known or inferred/Aliases: SPS1/HUGO ID: 11296/UniProt ID: P19623/                                   |
| 8985.1       | 8985           | PLOD3       | procollagen-lysine, 2-oxoglutarate 5-dioxygenase 3                                                                                                        |                                                                                                                                                      |
| 53.1         | 53             | ACP2        | acid phosphatase 2, lysosomal                                                                                                                             | HUGO ID: 123/UniProt ID: P11117/                                                                                                                     |
| 2182.1       | 2182           | ACSL4       | acyl-CoA synthetase long-chain family member 4                                                                                                            | Locus type: gene with protein product, function known or inferred/Aliases: ACS4, MRX63, LACS4/HUGO ID: 3571/UniProt ID: O60488/MGD ID: MGI:1354713/  |
| 6484.1       | 6484           | SIAT4C      | sialyltransferase 4C (beta-galactoside alpha-2,3-sialyltransferase)                                                                                       |                                                                                                                                                      |
| 506.1        | 506            | ATP5B       | ATP synthase, H+ transporting, mitochondrial F1 complex, beta polypeptide                                                                                 | HUGO ID: 830/UniProt ID: P06576/                                                                                                                     |
| 7367.1       | 7367           | UGT2B17     | UDP glycosyltransferase 2 family, polypeptide B17                                                                                                         | Locus type: gene with protein product, function known or inferred/HUGO ID: 12547/UniProt ID: O75795/                                                 |
| 7388.1       | 7388           | UQCRH       | ubiquinol-cytochrome c reductase hinge protein                                                                                                            | Locus type: gene with protein product, function known or inferred/HUGO ID: 12590/UniProt ID: P07919/                                                 |
| 4952.1       | 4952           | OCRL        | oculocerebrorenal syndrome of Lowe                                                                                                                        | HUGO ID: 8108/UniProt ID: Q01968/                                                                                                                    |
| 5471.1       | 5471           | PPAT        | phosphoribosyl pyrophosphate amidotransferase                                                                                                             | Aliases: GPAT/HUGO ID: 9238/UniProt ID: Q06203/                                                                                                      |
| 1608.1       | 1608           | DGKG        | diacylglycerol kinase, gamma 90kDa                                                                                                                        | HUGO ID: 2853/UniProt ID: P49619/                                                                                                                    |
| 51606.1      | 51606          | ATP6V1H     | ATPase, H+ transporting, lysosomal 50/57kDa, V1 subunit H                                                                                                 |                                                                                                                                                      |
| 3704.1       | 3704           | ITPA        | inosine triphosphatase (nucleoside triphosphate pyrophosphatase)                                                                                          | Aliases: HGNC:15883, HLC14-06-P, dJ79416.3/HUGO ID: 6176/UniProt ID: Q9BY32/                                                                         |
| 26229.1      | 26229          | B3GAT3      | beta-1,3-glucuronyltransferase 3 (glucuronosyltransferase I)                                                                                              | Locus type: gene with protein product, function known or inferred/Aliases: GlcAT-1/HUGO ID: 923/UniProt ID: O94766/                                  |
| 9394.1       | 9394           | HS6ST1      | heparan sulfate 6-O-sulfotransferase 1                                                                                                                    | HUGO ID: 5201/UniProt ID: O60243/                                                                                                                    |
| 2591.1       | 2591           | GALNT3      | UDP-N-acetyl-alpha-D-galactosamine:polypeptide N-acetylgalactosaminyltransferase 3 (GalNAc-T3)                                                            | Aliases: GalNAc-T3/HUGO ID: 4125/UniProt ID: Q14435/                                                                                                 |
| 482.1        | 482            | ATP1B2      | ATPase, Na+/K+ transporting, beta 2 polypeptide                                                                                                           | Aliases: AMOG/HUGO ID: 805/UniProt ID: P14415/                                                                                                       |
| 280.1        | 280            | AMY2B       | amylase, alpha 2B; pancreatic                                                                                                                             | HUGO ID: 478/UniProt ID: P19961/                                                                                                                     |
| 5091.1       | 5091           | PC          | pyruvate carboxylase                                                                                                                                      | Aliases: PCB/HUGO ID: 8636/UniProt ID: P11498/                                                                                                       |
| 4248.1       | 4248           | MGAT3       | mannosyl (beta-1,4-)-glycoprotein beta-1,4-N-acetylglucosaminyltransferase                                                                                | Aliases: GNT-III/HUGO ID: 7046/UniProt ID: Q09327/                                                                                                   |
| 1738.1       | 1738           | DLD         | dihydroliipoamide dehydrogenase (E3 component of pyruvate dehydrogenase complex, 2-oxo-glutarate complex, branched chain keto acid dehydrogenase complex) | Aliases: DLDH/HUGO ID: 2898/UniProt ID: P09622/                                                                                                      |
| 23464.1      | 23464          | GCAT        | glycine C-acetyltransferase (2-amino-3-ketobutyrate coenzyme A ligase)                                                                                    | Aliases: KBL/HUGO ID: 4188/UniProt ID: O75600/                                                                                                       |

| Abbreviation | Entrez Gene ID | Gene Symbol | Putative Function                                                                              | Additional notes                                                                                                                                      |
|--------------|----------------|-------------|------------------------------------------------------------------------------------------------|-------------------------------------------------------------------------------------------------------------------------------------------------------|
| 127.1        | 127            | ADH4        | alcohol dehydrogenase 4 (class II), pi polypeptide                                             | Locus type: gene with protein product, function known or inferred/Aliases: ADH-2/HUGO ID: 252/UniProt ID: P08319/                                     |
| 5209.1       | 5209           | PFKFB3      | 6-phosphofructo-2-kinase/fructose-2,6-biphosphatase 3                                          |                                                                                                                                                       |
| 51251.1      | 51251          | NT5C3       | 5'-nucleotidase, cytosolic III                                                                 | *PubMed                                                                                                                                               |
| 1327.1       | 1327           | COX4I1      | cytochrome c oxidase subunit IV isoform 1                                                      |                                                                                                                                                       |
| 27306.1      | 27306          | PGDS        | prostaglandin D2 synthase, hematopoietic                                                       | transcript: NM_014485                                                                                                                                 |
| 5053.1       | 5053           | PAH         | phenylalanine hydroxylase                                                                      | HUGO ID: 8582/UniProt ID: P00439/                                                                                                                     |
| 522.1        | 522            | ATP5J       | ATP synthase, H+ transporting, mitochondrial F0 complex, subunit F6                            | Variant 1: This variant (1) represents the longest transcript. Variants 1, 2, 3 and 4 encode the same isoform (a). transcript: NM_001003703           |
| 5137.1       | 5137           | PDE1C       | phosphodiesterase 1C, calmodulin-dependent 70kDa                                               | Aliases: Hcam3/HUGO ID: 8776/UniProt ID: Q14123/                                                                                                      |
| 4718.1       | 4718           | NDUFC2      | NADH dehydrogenase (ubiquinone) 1, subcomplex unknown 2, 14.5kDa                               | Aliases: B14.5b/HUGO ID: 7706/UniProt ID: O95298/                                                                                                     |
| 471.1        | 471            | ATIC        | 5-aminoimidazole-4-carboxamide ribonucleotide formyltransferase/IMP cyclohydrolase             | Aliases: PURH, AICARFT, IMPCHASE/HUGO ID: 794/UniProt ID: P31939/                                                                                     |
| 10555.1      | 10555          | AGPAT2      | 1-acylglycerol-3-phosphate O-acyltransferase 2 (lysophosphatidic acid acyltransferase, beta)   |                                                                                                                                                       |
| 25796.1      | 25796          | PGLS        | 6-phosphogluconolactonase                                                                      | Aliases: 6PGL/HUGO ID: 8903/UniProt ID: O95336/                                                                                                       |
| 84129.1      | 84129          | FLJ12592    | hypothetical protein FLJ12592                                                                  | transcript: NM_032169                                                                                                                                 |
| 978.1        | 978            | CDA         | cytidine deaminase                                                                             |                                                                                                                                                       |
| 6611.1       | 6611           | SMS         | spermine synthase                                                                              |                                                                                                                                                       |
| 4541.1       | 4541           | MTND6       | NADH dehydrogenase 6                                                                           | HUGO ID: 7462/UniProt ID: P03923/                                                                                                                     |
| 4706.1       | 4706           | NDUFAB1     | NADH dehydrogenase (ubiquinone) 1, alpha/beta subcomplex, 1, 8kDa                              |                                                                                                                                                       |
| 5160.1       | 5160           | PDHA1       | pyruvate dehydrogenase (lipoamide) alpha 1                                                     | HUGO ID: 8806/UniProt ID: P08559/                                                                                                                     |
| 229.1        | 229            | ALDOB       | aldolase B, fructose-bisphosphate                                                              | HUGO ID: 417/UniProt ID: P05062/                                                                                                                      |
| 204.1        | 204            | AK2         | adenylate kinase 2                                                                             | Locus type: gene with protein product, function known or inferred/HUGO ID: 362/UniProt ID: P54819/                                                    |
| 2585.1       | 2585           | GALK2       | galactokinase 2                                                                                | Aliases: GK2/HUGO ID: 4119/UniProt ID: Q01415/                                                                                                        |
| 1345.1       | 1345           | COX6C       | cytochrome c oxidase subunit VIc                                                               | HUGO ID: 2285/UniProt ID: P09669/                                                                                                                     |
| 51004.1      | 51004          | COQ6        | coenzyme Q6 homolog (yeast)                                                                    | Locus type: gene with protein product, function unknown/Aliases: CGI-10/HUGO ID: 20233/UniProt ID: Q9Y2Z9/                                            |
| 8639.1       | 8639           | AOC3        | amine oxidase, copper containing 3 (vascular adhesion protein 1)                               |                                                                                                                                                       |
| 52.1         | 52             | ACP1        | acid phosphatase 1, soluble                                                                    | HUGO ID: 122/UniProt ID: P24666/                                                                                                                      |
| 10654.1      | 10654          | PMVK        | phosphomevalonate kinase                                                                       |                                                                                                                                                       |
| 1581.1       | 1581           | CYP7A1      | cytochrome P450, family 7, subfamily A, polypeptide 1                                          | Locus type: gene with protein product, function known or inferred/HUGO ID: 2651/UniProt ID: P22680/                                                   |
| 9380.1       | 9380           | GRHPR       | glyoxylate reductase/hydroxypyruvate reductase                                                 | HUGO ID: 4570/UniProt ID: Q9UBQ7/                                                                                                                     |
| 26237.1      | 26237          | ENO1B       | enolase alpha, lung-specific                                                                   |                                                                                                                                                       |
| 4942.1       | 4942           | OAT         | ornithine aminotransferase (gyrate atrophy)                                                    | Locus type: gene with protein product, function known or inferred/Aliases: HOGA/HUGO ID: 8091/UniProt ID: P04181/                                     |
| 8396.1       | 8396           | PIP5K2B     | phosphatidylinositol-4-phosphate 5-kinase, type II, beta                                       | transcript: NM_003559                                                                                                                                 |
| 1576.1       | 1576           | CYP3A4      | cytochrome P450, family 3, subfamily A, polypeptide 4                                          |                                                                                                                                                       |
| 5332.1       | 5332           | PLCB4       | phospholipase C, beta 4                                                                        | HUGO ID: 9059/UniProt ID: Q15147/                                                                                                                     |
| 4708.1       | 4708           | NDUFB2      | NADH dehydrogenase (ubiquinone) 1 beta subcomplex, 2, 8kDa                                     |                                                                                                                                                       |
| 50614.1      | 50614          | GALNT9      | UDP-N-acetyl-alpha-D-galactosamine:polypeptide N-acetylgalactosaminyltransferase 9 (GalNAc-T9) | Aliases: GALNAC-T9/HUGO ID: 4131/UniProt ID: Q9HCQ5/                                                                                                  |
| 4953.1       | 4953           | ODC1        | ornithine decarboxylase 1                                                                      | HUGO ID: 8109/UniProt ID: P11926/                                                                                                                     |
| 9551.1       | 9551           | ATP5J2      | ATP synthase, H+ transporting, mitochondrial F0 complex, subunit f, isoform 2                  | Aliases: F1Fo-ATPase/HUGO ID: 848/UniProt ID: P56134/Variant 1: This variant represents the longest transcript, and it encodes the longest isoform 2a |
| 34.1         | 34             | ACADM       | acyl-Coenzyme A dehydrogenase, C-4 to C-12 straight chain                                      | Locus type: gene with protein product, function known or inferred/Aliases: MCAD, MCADH, ACAD1/HUGO ID: 89/UniProt ID: P11310/                         |
| 2525.1       | 2525           | FUT3        | fucosyltransferase 3 (galactoside 3(4)-L-fucosyltransferase, Lewis blood group included)       |                                                                                                                                                       |
| 4509.1       | 4509           | MTATP8      | ATP synthase 8                                                                                 | HUGO ID: 7415/UniProt ID: P03928/                                                                                                                     |
| 6390.1       | 6390           | SDHB        | succinate dehydrogenase complex, subunit B, iron sulfur (Ip)                                   | HUGO ID: 10681/UniProt ID: P21912/MGD ID: MGI:1914930/                                                                                                |
| 2592.1       | 2592           | GALT        | galactose-1-phosphate uridylyltransferase                                                      | HUGO ID: 4135/UniProt ID: P07902/                                                                                                                     |
| 7364.1       | 7364           | UGT2B7      | UDP glycosyltransferase 2 family, polypeptide B7                                               |                                                                                                                                                       |
| 262.1        | 262            | AMD1        | adenosylmethionine decarboxylase 1                                                             | HUGO ID: 457/UniProt ID: P17707/                                                                                                                      |
| 1806.1       | 1806           | DPYD        | dihydropyrimidine dehydrogenase                                                                | HUGO ID: 3012/UniProt ID: Q12882/                                                                                                                     |
| 8526.1       | 8526           | DGKE        | diacylglycerol kinase, epsilon 64kDa                                                           |                                                                                                                                                       |
| 5294.1       | 5294           | PIK3CG      | phosphoinositide-3-kinase, catalytic, gamma polypeptide                                        | HUGO ID: 8978/UniProt ID: P48736/                                                                                                                     |
| 528.1        | 528            | ATP6V1C1    | ATPase, H+ transporting, lysosomal 42kDa, V1 subunit C, isoform 1                              | Aliases: ATP6D, VATC, Vma5/HUGO ID: 856/UniProt ID: P21283/                                                                                           |
| 3157.1       | 3157           | HMGCS1      | 3-hydroxy-3-methylglutaryl-Coenzyme A synthase 1 (soluble)                                     | HUGO ID: 5007/UniProt ID: Q01581/                                                                                                                     |
| 2948.1       | 2948           | GSTM4       | glutathione S-transferase M4                                                                   | Locus type: gene with protein product, function known or inferred/HUGO ID: 4636/UniProt ID: Q03013/                                                   |
| 1737.1       | 1737           | DLAT        | dihydrolipoamide S-acetyltransferase (E2 component of pyruvate dehydrogenase complex)          | Aliases: PDC-E2/HUGO ID: 2896/UniProt ID: P10515/                                                                                                     |

| Abbreviation | Entrez Gene ID | Gene Symbol | Putative Function                                                                                             | Additional notes                                                                                                                                   |
|--------------|----------------|-------------|---------------------------------------------------------------------------------------------------------------|----------------------------------------------------------------------------------------------------------------------------------------------------|
| 1798.1       | 1798           | DPAGT1      | dolichyl-phosphate (UDP-N-acetylglucosamine) N-acetylglucosaminophosphotransferase 1 (GlcNAc-1-P transferase) | Aliases: GPT, D11S366, DGPT, ALG7, CDG-Ij/HUGO ID: 2995/UniProt ID: Q9H3H5/                                                                        |
| 8875.1       | 8875           | VNN2        | vanin 2                                                                                                       |                                                                                                                                                    |
| 5723.1       | 5723           | PSPH        | phosphoserine phosphatase                                                                                     | HUGO ID: 9577/UniProt ID: P78330/                                                                                                                  |
| 4257.1       | 4257           | MGST1       | microsomal glutathione S-transferase 1                                                                        | Aliases: MGST-I/HUGO ID: 7061/UniProt ID: P10620/                                                                                                  |
| 2997.1       | 2997           | GYS1        | glycogen synthase 1 (muscle)                                                                                  | Aliases: GSY/HUGO ID: 4706/UniProt ID: P13807/                                                                                                     |
| 6675.1       | 6675           | UAP1        | UDP-N-acetylglucosamine pyrophosphorylase 1                                                                   |                                                                                                                                                    |
| 1548.1       | 1548           | CYP2A6      | cytochrome P450, family 2, subfamily A, polypeptide 6                                                         |                                                                                                                                                    |
| 5136.1       | 5136           | PDE1A       | phosphodiesterase 1A, calmodulin-dependent                                                                    |                                                                                                                                                    |
| 23545.1      | 23545          | ATP6V0A2    | ATPase, H+ transporting, lysosomal V0 subunit a isoform 2                                                     | Aliases: TJ6, a2, TJ6s, TJ6M, ATP6a2, J6B7, ATP6N1D, Vph1, Stv1/HUGO ID: 18481/UniProt ID: Q9Y487/                                                 |
| 5208.1       | 5208           | PFKFB2      | 6-phosphofructo-2-kinase/fructose-2,6-biphosphatase 2                                                         | HUGO ID: 8873/UniProt ID: O60825/                                                                                                                  |
| 2588.1       | 2588           | GALNS       | galactosamine (N-acetyl)-6-sulfate sulfatase (Morquio syndrome, mucopolysaccharidosis type IVA)               | Aliases: GAS, GALNAC6S/HUGO ID: 4122/UniProt ID: P34059/                                                                                           |
| 4719.1       | 4719           | NDUFS1      | NADH dehydrogenase (ubiquinone) Fe-S protein 1, 75kDa (NADH-coenzyme Q reductase)                             | HUGO ID: 7707/UniProt ID: P28331/                                                                                                                  |
| 521.1        | 521            | ATP5I       | ATP synthase, H+ transporting, mitochondrial F0 complex, subunit e                                            | HUGO ID: 846/UniProt ID: P56385/                                                                                                                   |
| 2799.1       | 2799           | GNS         | glucosamine (N-acetyl)-6-sulfatase (Sanfilippo disease IIID)                                                  | HUGO ID: 4422/UniProt ID: P15586/                                                                                                                  |
| 107.1        | 107            | ADCY1       | adenylate cyclase 1 (brain)                                                                                   | Locus type: gene with protein product, function known or inferred/HUGO ID: 232/UniProt ID: Q08828/                                                 |
| 2805.1       | 2805           | GOT1        | glutamic-oxaloacetic transaminase 1, soluble (aspartate aminotransferase 1)                                   | Locus type: gene with protein product, function known or inferred/HUGO ID: 4432/UniProt ID: P17174/                                                |
| 6713.1       | 6713           | SQLE        | squalene epoxidase                                                                                            | Locus type: gene with protein product, function known or inferred/HUGO ID: 11279/UniProt ID: Q14534/                                               |
| 4832.1       | 4832           | NME3        | non-metastatic cells 3, protein expressed in                                                                  | Locus type: gene with protein product, function known or inferred/Aliases: Dnm23/HUGO ID: 7851/UniProt ID: Q13232/                                 |
| 2582.1       | 2582           | GALE        | UDP-galactose-4-epimerase                                                                                     | Locus type: gene with protein product, function known or inferred/HUGO ID: 4116/UniProt ID: Q14376/                                                |
| 5161.1       | 5161           | PDHA2       | pyruvate dehydrogenase (lipoamide) alpha 2                                                                    | HUGO ID: 8807/UniProt ID: P29803/                                                                                                                  |
| 203.1        | 203            | AK1         | adenylate kinase 1                                                                                            | HUGO ID: 361/UniProt ID: P00568/                                                                                                                   |
| 10423.1      | 10423          | CDIPT       | CDP-diacylglycerol--inositol 3-phosphatidyltransferase (phosphatidylinositol synthase)                        | Locus type: gene with protein product, function known or inferred/Aliases: PIS1, PIS/HUGO ID: 1769/UniProt ID: O14735/                             |
| 8790.1       | 8790           | FPGT        | fucose-1-phosphate guanylyltransferase                                                                        | Aliases: GFPP/HUGO ID: 3825/UniProt ID: O14772/                                                                                                    |
| 23478.1      | 23478          | SPC18       | signal peptidase complex (18kD)                                                                               | transcript: NM_014300                                                                                                                              |
| 10327.1      | 10327          | AKR1A1      | aldo-keto reductase family 1, member A1 (aldehyde reductase)                                                  | transcript: NM_006066                                                                                                                              |
| 242.1        | 242            | ALOX12B     | arachidonate 12-lipoxygenase, 12R type                                                                        | HUGO ID: 430/UniProt ID: O75342/                                                                                                                   |
| 8443.1       | 8443           | GNPAT       | glyceronephosphate O-acyltransferase                                                                          |                                                                                                                                                    |
| 1558.1       | 1558           | CYP2C8      | cytochrome P450, family 2, subfamily C, polypeptide 8                                                         | Locus type: gene with protein product, function known or inferred/Aliases: CPC8/HUGO ID: 2622/UniProt ID: P10632/                                  |
| 2593.1       | 2593           | GAMT        | guanidinoacetate N-methyltransferase                                                                          |                                                                                                                                                    |
| 55350.1      | 55350          | VNN3        | vanin 3                                                                                                       | Locus type: gene with protein product, function known or inferred/Aliases: HSA238982/HUGO ID: 16431/UniProt ID: Q9NY84/                            |
| 50617.1      | 50617          | ATP6V0A4    | ATPase, H+ transporting, lysosomal V0 subunit a isoform 4                                                     | *PubMed                                                                                                                                            |
| 2629.1       | 2629           | GBA         | glucosidase, beta; acid (includes glucosylceramidase)                                                         | Aliases: GLUC, GBA1/HUGO ID: 4177/UniProt ID: P04062/                                                                                              |
| 30814.1      | 30814          | PLA2G2E     | phospholipase A2, group IIE                                                                                   |                                                                                                                                                    |
| 9420.1       | 9420           | CYP7B1      | cytochrome P450, family 7, subfamily B, polypeptide 1                                                         | Locus type: gene with protein product, function known or inferred/HUGO ID: 2652/UniProt ID: O75881/                                                |
| 498.1        | 498            | ATP5A1      | ATP synthase, H+ transporting, mitochondrial F1 complex, alpha subunit, isoform 1, cardiac muscle             | Locus type: gene with protein product, function known or inferred/Aliases: ATP5A, hATP1, ATPM, OMR, ORM, HGNC:826/HUGO ID: 823/UniProt ID: P25705/ |
| 10846.1      | 10846          | PDE10A      | phosphodiesterase 10A                                                                                         | HUGO ID: 8772/UniProt ID: Q9Y233/                                                                                                                  |
| 4843.1       | 4843           | NOS2A       | nitric oxide synthase 2A (inducible, hepatocytes)                                                             | Locus type: gene with protein product, function known or inferred/Aliases: INOS, NOS, HEP-NOS/HUGO ID: 7873/UniProt ID: P35228/                    |
| 35.1         | 35             | ACADS       | acyl-Coenzyme A dehydrogenase, C-2 to C-3 short chain                                                         | Locus type: gene with protein product, function known or inferred/Aliases: SCAD, ACAD3/HUGO ID: 90/UniProt ID: P16219/                             |
| 64579.1      | 64579          | NDST4       | N-deacetylase/N-sulfotransferase (heparan glucosaminyl) 4                                                     | Locus type: gene with protein product, function known or inferred/HUGO ID: 20779/UniProt ID: Q9H3R1/                                               |
| 51.1         | 51             | ACOX1       | acyl-Coenzyme A oxidase 1, palmitoyl                                                                          | Aliases: PALMCOX/HUGO ID: 119/UniProt ID: Q15067/                                                                                                  |
| 3906.1       | 3906           | LALBA       | lactalbumin, alpha-                                                                                           | Locus type: gene with protein product, function known or inferred/Aliases: LYZL7/HUGO ID: 6480/UniProt ID: P00709/                                 |
| 22978.1      | 22978          | NTSC2       | 5'-nucleotidase, cytosolic II                                                                                 | Aliases: PNT5, GMP, cN-II/HUGO ID: 8022/UniProt ID: P49902/                                                                                        |
| 316.1        | 316            | AOX1        | aldehyde oxidase 1                                                                                            | Aliases: AO, AOH1/HUGO ID: 553/UniProt ID: Q06278/                                                                                                 |
| 1579.1       | 1579           | CYP4A11     | cytochrome P450, family 4, subfamily A, polypeptide 11                                                        | Locus type: gene with protein product, function known or inferred/Aliases: CYP4A11/HUGO ID: 2642/UniProt ID: Q02928/                               |
| 97.1         | 97             | ACYP1       | acylphosphatase 1, erythrocyte (common) type                                                                  | transcript: NM_001107                                                                                                                              |
| 2180.1       | 2180           | ACSL1       | acyl-CoA synthetase long-chain family member                                                                  |                                                                                                                                                    |
| 4247.1       | 4247           | MGAT2       | mannosyl (alpha-1,6-)-glycoprotein beta-1,2-N-acetylglucosaminyltransferase                                   | Aliases: GNT-II/HUGO ID: 7045/UniProt ID: Q10469/                                                                                                  |

| Abbreviation | Entrez Gene ID | Gene Symbol | Putative Function                                                                                                                      | Additional notes                                                                                                                                                |
|--------------|----------------|-------------|----------------------------------------------------------------------------------------------------------------------------------------|-----------------------------------------------------------------------------------------------------------------------------------------------------------------|
| 9550.1       | 9550           | ATP6V1G1    | ATPase, H+ transporting, lysosomal 13kDa, V1 subunit G isoform 1                                                                       | Aliases: ATP6GL, Vma10/HUGO ID: 864/UniProt ID: O75348/                                                                                                         |
| 8854.1       | 8854           | ALDH1A2     | aldehyde dehydrogenase 1 family, member A2                                                                                             | Locus type: gene with protein product, function known or inferred/Aliases: RALDH2/HUGO ID: 15472/UniProt ID: O94788/                                            |
| 5319.1       | 5319           | PLA2G1B     | phospholipase A2, group IB (pancreas)                                                                                                  | HUGO ID: 9030/UniProt ID: P04054/                                                                                                                               |
| 4329.1       | 4329           | ALDH6A1     | aldehyde dehydrogenase 6 family, member A1                                                                                             | HUGO ID: 7179/UniProt ID: Q02252/                                                                                                                               |
| 23533.1      | 23533          | P101-PI3K   | phosphoinositide-3-kinase, regulatory subunit, polypeptide p101                                                                        |                                                                                                                                                                 |
| 3156.1       | 3156           | HMGCR       | 3-hydroxy-3-methylglutaryl-Coenzyme A reductase                                                                                        | HUGO ID: 5006/UniProt ID: P04035/                                                                                                                               |
| 5297.1       | 5297           | PIK4CA      | phosphatidylinositol 4-kinase, catalytic, alpha polypeptide                                                                            |                                                                                                                                                                 |
| 5051.1       | 5051           | PAFAH2      | platelet-activating factor acetylhydrolase 2, 40kDa                                                                                    |                                                                                                                                                                 |
| 529.1        | 529            | ATP6V1E1    | ATPase, H+ transporting, lysosomal 31kDa, V1 subunit E isoform 1                                                                       |                                                                                                                                                                 |
| 5834.1       | 5834           | PYGB        | phosphorylase, glycogen; brain                                                                                                         | HUGO ID: 9723/UniProt ID: P11216/                                                                                                                               |
| 50808.1      | 50808          | AK3L1       | adenylate kinase 3 like 1                                                                                                              | Locus type: gene with protein product, function unknown/Aliases: AKL3L1, HGNC:366/HUGO ID: 17376/UniProt ID: Q9UIJ7/MGI: MGI:1860835/                           |
| 412.1        | 412            | STS         | steroid sulfatase (microsomal), arylsulfatase C, isozyme S                                                                             | Aliases: ARSC/HUGO ID: 11425/UniProt ID: P08842/                                                                                                                |
| 1543.1       | 1543           | CYP1A1      | cytochrome P450, family 1, subfamily A, polypeptide 1                                                                                  | Locus type: gene with protein product, function known or inferred/Aliases: AHRH, AHH, P450DX, P1-450, P450-C, CP11/HUGO ID: 2595/UniProt ID: P04798/MGI: 88588/ |
| 5973.1       | 5973           | RENBP       | renin binding protein                                                                                                                  | Aliases: RBNP/HUGO ID: 9959/UniProt ID: P51606/                                                                                                                 |
| 2752.1       | 2752           | GLUL        | glutamate-ammonia ligase (glutamine synthase)                                                                                          |                                                                                                                                                                 |
| 231.1        | 231            | AKR1B1      | aldo-keto reductase family 1, member B1 (aldose reductase)                                                                             | Aliases: AR/HUGO ID: 381/UniProt ID: P15121/                                                                                                                    |
| 2538.1       | 2538           | G6PC        | glucose-6-phosphatase, catalytic (glycogen storage disease type I, von Gierke disease)                                                 | Locus type: gene with protein product, function known or inferred/Aliases: GSD1a/HUGO ID: 4056/UniProt ID: P35575/                                              |
| 7378.1       | 7378           | UPP1        | uridine phosphorylase                                                                                                                  |                                                                                                                                                                 |
| 4522.1       | 4522           | MTHFD1      | methylenetetrahydrofolate dehydrogenase (NADP+ dependent), methylenetetrahydrofolate cyclohydrolase, formyltetrahydrofolate synthetase |                                                                                                                                                                 |
| 516.1        | 516            | ATP5G1      | ATP synthase, H+ transporting, mitochondrial F0 complex, subunit c (subunit 9), isoform 1                                              | HUGO ID: 841/UniProt ID: P05496/Variant 1: This variant represents the longer transcript, Variants 1 and 2 encode the same protein.                             |
| 2875.1       | 2875           | GPT1        | glutamic-pyruvate transaminase (alanine aminotransferase)                                                                              | Aliases: ALT1, GPT1/HUGO ID: 4552/UniProt ID: P24298/                                                                                                           |
| 594.1        | 594            | BCKDHB      | branched chain keto acid dehydrogenase E1, beta polypeptide (maple syrup urine disease)                                                | Locus type: gene with protein product, function known or inferred/HUGO ID: 987/UniProt ID: P21953/                                                              |
| 1743.1       | 1743           | DLST        | dihydroliipoamide S-succinyltransferase (E2 component of 2-oxo-glutarate complex)                                                      | HUGO ID: 2911/UniProt ID: P36957/                                                                                                                               |
| 3032.1       | 3032           | HADHB       | hydroxyacyl-Coenzyme A dehydrogenase/3-ketoacyl-Coenzyme A thiolase/enoyl-Coenzyme A hydratase (trifunctional protein), beta subunit   | HUGO ID: 4803/UniProt ID: P55084/                                                                                                                               |
| 23475.1      | 23475          | QPRT        | quinolate phosphoribosyltransferase (nicotinate-nucleotide pyrophosphorylase (carboxylating))                                          | Locus type: gene with protein product, function known or inferred/Aliases: QPRTase/HUGO ID: 9755/UniProt ID: Q15274/                                            |
| 4882.1       | 4882           | NPR2        | natriuretic peptide receptor B/guanylate cyclase B (atrialnatriuretic peptide receptor B)                                              | Aliases: GUC2B/HUGO ID: 7944/UniProt ID: P20594/                                                                                                                |
| 1557.1       | 1557           | CYP2C19     | cytochrome P450, family 2, subfamily C, polypeptide 19                                                                                 |                                                                                                                                                                 |
| 771.1        | 771            | CA12        | carbonic anhydrase XII                                                                                                                 | Locus type: gene with protein product, function known or inferred/Aliases: HsT18816/HUGO ID: 1371/UniProt ID: O43570/                                           |
| 5162.1       | 5162           | PDHB        | pyruvate dehydrogenase (lipoamide) beta                                                                                                | HUGO ID: 8808/UniProt ID: P11177/                                                                                                                               |
| 6916.1       | 6916           | TBXAS1      | thromboxane A synthase 1 (platelet, cytochrome P450, family 5, subfamily A)                                                            |                                                                                                                                                                 |
| 5147.1       | 5147           | PDE6D       | phosphodiesterase 6D, cGMP-specific, rod, delta                                                                                        |                                                                                                                                                                 |
| 3033.1       | 3033           | HADHSC      | L-3-hydroxyacyl-Coenzyme A dehydrogenase, short chain                                                                                  | Locus type: gene with protein product, function known or inferred/Aliases: SCHAD/HUGO ID: 4804/UniProt ID: Q16836/                                              |
| 220.1        | 220            | ALDH1A3     | aldehyde dehydrogenase 1 family, member A3                                                                                             | Aliases: RALDH3/HUGO ID: 409/UniProt ID: P47895/                                                                                                                |
| 9060.1       | 9060           | PAPSS2      | 3'-phosphoadenosine 5'-phosphosulfate synthase 2                                                                                       | Aliases: ATPSK2/HUGO ID: 8604/UniProt ID: O95340/                                                                                                               |
| 5226.1       | 5226           | PGD         | phosphogluconate dehydrogenase                                                                                                         | Locus type: gene with protein product, function known or inferred/HUGO ID: 8891/UniProt ID: P52209/MGI: MGI:97553/                                              |
| 5009.1       | 5009           | OTC         | ornithine carbamoyltransferase                                                                                                         | HUGO ID: 8512/UniProt ID: P00480/                                                                                                                               |
| 51809.1      | 51809          | GALNT7      | UDP-N-acetyl-alpha-D-galactosamine:polypeptide N-acetylgalactosaminyltransferase 7 (GalNAc-T7)                                         | Locus type: gene with protein product, function known or inferred/Aliases: GALNAC-T7/HUGO ID: 4129/UniProt ID: Q9UJ28/                                          |
| 3712.1       | 3712           | IVD         | isovaleryl Coenzyme A dehydrogenase                                                                                                    | Locus type: gene with protein product, function known or inferred/Aliases: ACAD2/HUGO ID: 6186/UniProt ID: P26440/                                              |
| 51382.1      | 51382          | ATP6V1D     | ATPase, H+ transporting, lysosomal 34kDa, V1 subunit D                                                                                 | Aliases: VATD, VMA8/HUGO ID: 13527/UniProt ID: Q9Y5K8/                                                                                                          |
| 36.1         | 36             | ACADSB      | acyl-Coenzyme A dehydrogenase, short/branched chain                                                                                    |                                                                                                                                                                 |
| 5130.1       | 5130           | PCYT1A      | phosphate cytidylyltransferase 1, choline, alpha isoform                                                                               | Aliases: CT, CTPCT/HUGO ID: 8754/UniProt ID: P49585/                                                                                                            |
| 11164.1      | 11164          | NUDT5       | mudix (nucleoside diphosphate linked moiety X)-type motif 5                                                                            | Aliases: hYSAH1, YSA1H/HUGO ID: 8052/UniProt ID: Q9UQK9/                                                                                                        |
| 1854.1       | 1854           | DUT         | dUTP pyrophosphatase                                                                                                                   |                                                                                                                                                                 |
| 8836.1       | 8836           | GGH         | gamma-glutamyl hydrolase (conjugase, folylpolygammaglutamyl hydrolase)                                                                 |                                                                                                                                                                 |



| Abbreviation | Entrez Gene ID | Gene Symbol | Putative Function                                                                             | Additional notes                                                                                                                               |
|--------------|----------------|-------------|-----------------------------------------------------------------------------------------------|------------------------------------------------------------------------------------------------------------------------------------------------|
| 761.1        | 761            | CA3         | carbonic anhydrase III, muscle specific                                                       | HUGO ID: 1374/UniProt ID: P07451/                                                                                                              |
| 2134.1       | 2134           | EXTL1       | exostosins (multiple)-like 1                                                                  | Aliases: EXTL/HUGO ID: 3515/UniProt ID: Q92935/                                                                                                |
| 9514.1       | 9514           | CST         | cerebroside (3'-phosphoadenylylsulfate:galactosylceramide 3 sulfotransferase                  |                                                                                                                                                |
| 50.1         | 50             | ACO2        | aconitase 2, mitochondrial                                                                    | HUGO ID: 118/UniProt ID: Q99798/                                                                                                               |
| 2746.1       | 2746           | GLUD1       | glutamate dehydrogenase 1                                                                     | Locus type: gene with protein product, function known or inferred/Aliases: GDH/HUGO ID: 4335/UniProt ID: P00367/                               |
| 527.1        | 527            | ATP6V0C     | ATPase, H+ transporting, lysosomal 16kDa, V0 subunit c                                        |                                                                                                                                                |
| 175.1        | 175            | AGA         | aspartylglucosaminidase                                                                       | HUGO ID: 318/UniProt ID: P20933/                                                                                                               |
| 9791.1       | 9791           | PTDSS1      | phosphatidylserine synthase 1                                                                 | Aliases: KIAA0024, PSSA/HUGO ID: 9587/UniProt ID: P48651/                                                                                      |
| 7390.1       | 7390           | UROS        | uroporphyrinogen III synthase (congenital erythropoietic porphyria)                           | Locus type: gene with protein product, function known or inferred/HUGO ID: 12592/UniProt ID: P10746/                                           |
| 2181.1       | 2181           | ACSL3       | acyl-CoA synthetase long-chain family member 3                                                | Locus type: gene with protein product, function known or inferred/Aliases: ACS3, PRO2194/HUGO ID: 3570/UniProt ID: O95573/MGD ID: MGI:1921455/ |
| 1491.1       | 1491           | CTH         | cystathionase (cystathionine gamma-lyase)                                                     | Locus type: gene with protein product, function known or inferred/HUGO ID: 2501/UniProt ID: P32929/                                            |
| 6389.1       | 6389           | SDHA        | succinate dehydrogenase complex, subunit A, flavoprotein (Fp)                                 | Locus type: gene with protein product, function known or inferred/Aliases: FSDHF/HUGO ID: 10680/UniProt ID: P31040/                            |
| 1593.1       | 1593           | CYP27A1     | cytochrome P450, family 27, subfamily A, polypeptide 1                                        | Locus type: gene with protein product, function known or inferred/Aliases: CTX, CP27/HUGO ID: 2605/UniProt ID: Q02318/                         |
| 6309.1       | 6309           | SC5DL       | sterol-C5-desaturase (ERG3 delta-5-desaturase homolog, fungal)-like                           | HUGO ID: 10547/UniProt ID: O75845/                                                                                                             |
| 251.1        | 251            | ALPPL2      | alkaline phosphatase, placental-like 2                                                        | HUGO ID: 441/UniProt ID: P10696/                                                                                                               |
| 1962.1       | 1962           | EHHADH      | enoyl-Coenzyme A, hydratase/3-hydroxyacyl Coenzyme A dehydrogenase                            | HUGO ID: 3247/UniProt ID: Q08426/                                                                                                              |
| 3081.1       | 3081           | HGD         | homogentisate 1,2-dioxygenase (homogentisate oxidase)                                         | Aliases: HGO/HUGO ID: 4892/UniProt ID: Q93099/                                                                                                 |
| 5050.1       | 5050           | PAFAH1B3    | platelet-activating factor acetylhydrolase, isoform 1b, gamma subunit 29kDa                   | HUGO ID: 8576/UniProt ID: Q15102/                                                                                                              |
| 279.1        | 279            | AMY2A       | amylase, alpha 2A; pancreatic                                                                 | HUGO ID: 477/UniProt ID: P04746/                                                                                                               |
| 1350.1       | 1350           | COX7C       | cytochrome c oxidase subunit VIIc                                                             | HUGO ID: 2292/UniProt ID: P15954/                                                                                                              |
| 4724.1       | 4724           | NDUFS4      | NADH dehydrogenase (ubiquinone) Fe-S protein 4, 18kDa (NADH-coenzyme Q reductase)             |                                                                                                                                                |
| 5146.1       | 5146           | PDE6C       | phosphodiesterase 6C, cGMP-specific, cone, alpha prime                                        | Locus type: gene with protein product, function known or inferred/Aliases: PDEA2/HUGO ID: 8787/UniProt ID: P51160/                             |
| 8540.1       | 8540           | AGPS        | alkylglycerone phosphate synthase                                                             |                                                                                                                                                |
| 3155.1       | 3155           | HMGLCL      | 3-hydroxymethyl-3-methylglutaryl-Coenzyme A lyase (hydroxymethylglutaricaciduria)             |                                                                                                                                                |
| 23417.1      | 23417          | MLYCD       | malonyl-CoA decarboxylase                                                                     |                                                                                                                                                |
| 27087.1      | 27087          | B3GAT1      | beta-1,3-glucuronyltransferase 1 (glucuronosyltransferase P)                                  | Locus type: gene with protein product, function known or inferred/Aliases: GlcAT-P/HUGO ID: 921/UniProt ID: Q9P2W7/                            |
| 3176.1       | 3176           | HNMT        | histamine N-methyltransferase                                                                 | HUGO ID: 5028/UniProt ID: P50135/                                                                                                              |
| 10554.1      | 10554          | AGPAT1      | 1-acylglycerol-3-phosphate O-acyltransferase 1 (lysophosphatidic acid acyltransferase, alpha) |                                                                                                                                                |
| 4731.1       | 4731           | NDUFV3      | NADH dehydrogenase (ubiquinone) flavoprotein 3, 10kDa                                         | HUGO ID: 7719/UniProt ID: P56181/                                                                                                              |
| 440.1        | 440            | ASNS        | asparagine synthetase                                                                         | Locus type: gene with protein product, function known or inferred/HUGO ID: 753/UniProt ID: P08243/                                             |
| 438.1        | 438            | ASMT        | acetyserotonin O-methyltransferase                                                            |                                                                                                                                                |
| 2539.1       | 2539           | G6PD        | glucose-6-phosphate dehydrogenase                                                             | Aliases: G6PD1/HUGO ID: 4057/UniProt ID: P11413/                                                                                               |
| 5313.1       | 5313           | PKLR        | pyruvate kinase, liver and RBC                                                                | Locus type: gene with protein product, function known or inferred/HUGO ID: 9020/UniProt ID: P30613/                                            |
| 26.1         | 26             | ABP1        | amiloride binding protein 1 (amine oxidase (copper-containing))                               | Locus type: gene with protein product, function known or inferred/Aliases: AOC1, DAO/HUGO ID: 80/UniProt ID: P19801/                           |
| 2222.1       | 2222           | FDFT1       | farnesyl-diphosphate farnesyltransferase 1                                                    | HUGO ID: 3629/UniProt ID: P37268/                                                                                                              |
| 3948.1       | 3948           | LDHC        | lactate dehydrogenase C                                                                       | HUGO ID: 6544/UniProt ID: P07864/                                                                                                              |
| 84701.1      | 84701          | COX4I2      | cytochrome c oxidase subunit IV isoform 2 (lung)                                              | Aliases: COXIV-2, COX4B, dJ857M17.2/HUGO ID: 16232/UniProt ID: Q96KJ9/                                                                         |
| 515.1        | 515            | ATP5F1      | ATP synthase, H+ transporting, mitochondrial F0 complex, subunit b, isoform 1                 | HUGO ID: 840/UniProt ID: P24539/Variant 1: This variant represents the longest transcript, and encodes the longest isoform (1).                |
| 6470.1       | 6470           | SHMT1       | serine hydroxymethyltransferase 1 (soluble)                                                   | HUGO ID: 10850/UniProt ID: P34896/                                                                                                             |
| 5213.1       | 5213           | PFKM        | phosphofructokinase, muscle                                                                   | HUGO ID: 8877/UniProt ID: P08237/                                                                                                              |
| 124.1        | 124            | ADH1A       | alcohol dehydrogenase 1A (class I), alpha polypeptide                                         | Locus type: gene with protein product, function known or inferred/HUGO ID: 249/UniProt ID: P07327/                                             |
| 8992.1       | 8992           | ATP6V0E     | ATPase, H+ transporting, lysosomal 9kDa, V0 subunit e                                         | Aliases: M9.2, Vma21p, VMA21/HUGO ID: 863/UniProt ID: O15342/                                                                                  |
| 2949.1       | 2949           | GSTM5       | glutathione S-transferase M5                                                                  | Locus type: gene with protein product, function known or inferred/HUGO ID: 4637/UniProt ID: P46439/                                            |
| 2878.1       | 2878           | GPX3        | glutathione peroxidase 3 (plasma)                                                             |                                                                                                                                                |
| 4881.1       | 4881           | NPR1        | natriuretic peptide receptor A/guanylate cyclase A (atriuretic peptide receptor A)            | Locus type: gene with protein product, function known or inferred/Aliases: GUC2A, ANPa/HUGO ID: 7943/UniProt ID: P16066/                       |
| 4056.1       | 4056           | LTC4S       | leukotriene C4 synthase                                                                       | Locus type: gene with protein product, function known or inferred/Aliases: MGC33147/HUGO ID: 6719/UniProt ID: Q16873/                          |
| 240.1        | 240            | ALOX5       | arachidonate 5-lipoxygenase                                                                   | HUGO ID: 435/UniProt ID: P09917/                                                                                                               |

| Abbreviation | Entrez Gene ID | Gene Symbol | Putative Function                                                                                            | Additional notes                                                                                                                                   |
|--------------|----------------|-------------|--------------------------------------------------------------------------------------------------------------|----------------------------------------------------------------------------------------------------------------------------------------------------|
| 3000.1       | 3000           | GUCY2D      | guanylate cyclase 2D, membrane (retina-specific)                                                             | Aliases: retGC, RETGC-1, ROS-GC1/HUGO ID: 4689/UniProt ID: Q02846/                                                                                 |
| 3034.1       | 3034           | HAL         | histidine ammonia-lyase                                                                                      | HUGO ID: 4806/UniProt ID: P42357/                                                                                                                  |
| 8399.1       | 8399           | PLA2G10     | phospholipase A2, group X                                                                                    | Locus type: gene with protein product, function known or inferred/Aliases: GXPLA2/HUGO ID: 9029/UniProt ID: O15496/                                |
| 4512.1       | 4512           | MTCO1       | cytochrome c oxidase I                                                                                       | HUGO ID: 7419/UniProt ID: P00395/                                                                                                                  |
| 3340.1       | 3340           | NDST1       | N-deacetylase/N-sulfotransferase (heparan glucosaminyl) 1                                                    | *PubMed                                                                                                                                            |
| 514.1        | 514            | ATP5E       | ATP synthase, H+ transporting, mitochondrial F1 complex, epsilon subunit                                     | HUGO ID: 838/UniProt ID: P56381/                                                                                                                   |
| 8529.1       | 8529           | CYP4F2      | cytochrome P450, family 4, subfamily F, polypeptide 2                                                        |                                                                                                                                                    |
| 9615.1       | 9615           | GDA         | guanine deaminase                                                                                            |                                                                                                                                                    |
| 5140.1       | 5140           | PDE3B       | phosphodiesterase 3B, cGMP-inhibited                                                                         | HUGO ID: 8779/UniProt ID: Q13370/                                                                                                                  |
| 1891.1       | 1891           | ECH1        | enoyl Coenzyme A hydratase 1, peroxisomal                                                                    | Locus type: gene with protein product, function unknown/Aliases: HPXEL/HUGO ID: 3149/UniProt ID: Q13011/                                           |
| 2766.1       | 2766           | GMPR        | guanosine monophosphate reductase                                                                            | HUGO ID: 4376/UniProt ID: P36959/                                                                                                                  |
| 1036.1       | 1036           | CDO1        | cysteine dioxygenase, type I                                                                                 | Locus type: gene with protein product, function known or inferred/HUGO ID: 1795/UniProt ID: Q16878/                                                |
| 2595.1       | 2595           | GANC        | glucosidase, alpha; neutral C                                                                                | *PubMed                                                                                                                                            |
| 1340.1       | 1340           | COX6B1      | cytochrome c oxidase subunit Vib polypeptide 1 (ubiquitous)                                                  | Locus type: gene with protein product, function known or inferred/Aliases: COXG/HUGO ID: 2280/UniProt ID: P14854/                                  |
| 218.1        | 218            | ALDH3A1     | aldehyde dehydrogenase 3 family, member A1                                                                   |                                                                                                                                                    |
| 4709.1       | 4709           | NDUFB3      | NADH dehydrogenase (ubiquinone) 1 beta subcomplex, 3, 12kDa                                                  | Aliases: B12/HUGO ID: 7698/UniProt ID: O43676/                                                                                                     |
| 5337.1       | 5337           | PLD1        | phospholipase D1, phosphatidylethanolamine-specific                                                          |                                                                                                                                                    |
| 3938.1       | 3938           | LCT         | lactase                                                                                                      | HUGO ID: 6530/UniProt ID: P09848/                                                                                                                  |
| 6715.1       | 6715           | SRD5A1      | steroid-5-alpha-reductase, alpha polypeptide 1 (3-oxo-5 alpha steroid delta 4-dehydrogenase alpha 1)         | HUGO ID: 11284/UniProt ID: P18405/                                                                                                                 |
| 4720.1       | 4720           | NDUFS2      | NADH dehydrogenase (ubiquinone) Fe-S protein 2, 49kDa (NADH-coenzyme Q reductase)                            |                                                                                                                                                    |
| 51727.1      | 51727          | UMP-CMPK    | UMP-CMP kinase                                                                                               | transcript: NM_016308                                                                                                                              |
| 526.1        | 526            | ATP6V1B2    | ATPase, H+ transporting, lysosomal 56/58kDa, V1 subunit B, isoform 2                                         | Aliases: VATB, Vma2, HO57/HUGO ID: 854/UniProt ID: P21281/                                                                                         |
| 5277.1       | 5277           | PIGA        | phosphatidylinositol glycan, class A (paroxysmal nocturnal hemoglobinuria)                                   | Aliases: GPI3/HUGO ID: 8957/UniProt ID: P37287/                                                                                                    |
| 55500.1      | 55500          | EKI1        | ethanolamine kinase                                                                                          |                                                                                                                                                    |
| 26330.1      | 26330          | GAPDS       | glyceraldehyde-3-phosphate dehydrogenase, testis-specific                                                    |                                                                                                                                                    |
| 5158.1       | 5158           | PDE6B       | phosphodiesterase 6B, cGMP-specific, rod, beta (congenital stationary night blindness 3, autosomal dominant) | Locus type: gene with protein product, function known or inferred/Aliases: CSNB3/HUGO ID: 8786/UniProt ID: P35913/                                 |
| 2027.1       | 2027           | ENO3        | enolase 3 (beta, muscle)                                                                                     | HUGO ID: 3354/UniProt ID: P13929/                                                                                                                  |
| 3145.1       | 3145           | HMBS        | hydroxymethylbilan synthase                                                                                  | HUGO ID: 4982/UniProt ID: P08397/                                                                                                                  |
| 23530.1      | 23530          | NNT         | nicotinamide nucleotide transhydrogenase                                                                     |                                                                                                                                                    |
| 4535.1       | 4535           | MTND1       | NADH dehydrogenase 1                                                                                         | HUGO ID: 7455/UniProt ID: P03886/                                                                                                                  |
| 3028.1       | 3028           | HADH2       | hydroxyacyl-Coenzyme A dehydrogenase, type II                                                                | Locus type: gene with protein product, function known or inferred/Aliases: ERAB, MHBD, 17b-HSD10, ABAD, HSD17B10/HUGO ID: 4800/UniProt ID: Q99714/ |
| 4725.1       | 4725           | NDUFS5      | NADH dehydrogenase (ubiquinone) Fe-S protein 5, 15kDa (NADH-coenzyme Q reductase)                            |                                                                                                                                                    |
| 5408.1       | 5408           | PNLIPRP2    | pancreatic lipase-related protein 2                                                                          | Locus type: gene with protein product, function known or inferred/Aliases: PLRP2/HUGO ID: 9157/UniProt ID: P54317/                                 |
| 1351.1       | 1351           | COX8        | cytochrome c oxidase subunit VIII                                                                            |                                                                                                                                                    |
| 5238.1       | 5238           | PGM3        | phosphoglucomutase 3                                                                                         |                                                                                                                                                    |
| 2744.1       | 2744           | GLS         | glutaminase                                                                                                  | Aliases: KIAA0838, GLS1/HUGO ID: 4331/UniProt ID: O94925/                                                                                          |
| 873.1        | 873            | CBR1        | carbonyl reductase 1                                                                                         | HUGO ID: 1548/UniProt ID: P16152/                                                                                                                  |
| 1178.1       | 1178           | CLC         | Charcot-Leyden crystal protein                                                                               | Aliases: LGALS10/HUGO ID: 2014/UniProt ID: Q05315/                                                                                                 |
| 4846.1       | 4846           | NOS3        | nitric oxide synthase 3 (endothelial cell)                                                                   | Aliases: ECNOS/HUGO ID: 7876/UniProt ID: P29474/                                                                                                   |
| 535.1        | 535            | ATP6V0A1    | ATPase, H+ transporting, lysosomal V0 subunit a isoform 1                                                    | Aliases: a1, Vph1, Stv1/HUGO ID: 865/UniProt ID: Q93050/                                                                                           |
| 51179.1      | 51179          | HAO2        | hydroxyacid oxidase 2 (long chain)                                                                           | Aliases: HAOX2/HUGO ID: 4810/UniProt ID: Q9NYQ3/                                                                                                   |
| 353.1        | 353            | APRT        | adenine phosphoribosyltransferase                                                                            | HUGO ID: 626/UniProt ID: P07741/                                                                                                                   |
| 278.1        | 278            | AMY1C       | amylase, alpha 1C; salivary                                                                                  | Locus type: unknown/HUGO ID: 476/                                                                                                                  |
| 191.1        | 191            | AHCY        | S-adenosylhomocysteine hydrolase                                                                             | HUGO ID: 343/UniProt ID: P23526/                                                                                                                   |
| 1545.1       | 1545           | CYP1B1      | cytochrome P450, family 1, subfamily B, polypeptide 1                                                        |                                                                                                                                                    |
| 11283.1      | 11283          | CYP4F8      | cytochrome P450, family 4, subfamily F, polypeptide 8                                                        | Locus type: gene with protein product, function known or inferred/HUGO ID: 2648/UniProt ID: P98187/                                                |
| 5832.1       | 5832           | ALDH18A1    | aldehyde dehydrogenase 18 family, member A1                                                                  | Locus type: gene with protein product, function known or inferred/Aliases: P5CS/HUGO ID: 9722/UniProt ID: P54886/                                  |
| 2877.1       | 2877           | GPX2        | glutathione peroxidase 2 (gastrointestinal)                                                                  |                                                                                                                                                    |
| 3612.1       | 3612           | IMPA1       | inositol(myo)-1(or 4)-monophosphatase 1                                                                      | HUGO ID: 6050/UniProt ID: P29218/                                                                                                                  |
| 1559.1       | 1559           | CYP2C9      | cytochrome P450, family 2, subfamily C, polypeptide 9                                                        | *PubMed                                                                                                                                            |
| 3163.1       | 3163           | HMOX2       | heme oxygenase (decycling) 2                                                                                 | Aliases: HO-2/HUGO ID: 5014/UniProt ID: P30519/                                                                                                    |
| 5281.1       | 5281           | PIGF        | phosphatidylinositol glycan, class F                                                                         | HUGO ID: 8962/UniProt ID: Q07326/                                                                                                                  |
| 3284.1       | 3284           | HSD3B2      | hydroxy-delta-5-steroid dehydrogenase, 3 beta- and steroid delta-isomerase 2                                 | HUGO ID: 5218/UniProt ID: P26439/                                                                                                                  |

| Abbreviation | Entrez Gene ID | Gene Symbol | Putative Function                                                                                  | Additional notes                                                                                                                      |
|--------------|----------------|-------------|----------------------------------------------------------------------------------------------------|---------------------------------------------------------------------------------------------------------------------------------------|
| 5141.1       | 5141           | PDE4A       | phosphodiesterase 4A, cAMP-specific (phosphodiesterase E2 duncce homolog, Drosophila)              | HUGO ID: 8780/UniProt ID: P27815/                                                                                                     |
| 10873.1      | 10873          | ME3         | malic enzyme 3, NADP(+)-dependent, mitochondrial                                                   | HUGO ID: 6985/UniProt ID: Q16798/                                                                                                     |
| 13.1         | 13             | AADAC       | arylacacetamide deacetylase (esterase)                                                             | Locus type: gene with protein product, function known or inferred/Aliases: DAC/HUGO ID: 17/UniProt ID: P22760/                        |
| 4598.1       | 4598           | MVK         | mevalonate kinase (mevalonic aciduria)                                                             | HUGO ID: 7530/UniProt ID: Q03426/                                                                                                     |
| 513.1        | 513            | ATP5D       | ATP synthase, H+ transporting, mitochondrial F1 complex, delta subunit                             | HUGO ID: 837/UniProt ID: P30049/                                                                                                      |
| 246.1        | 246            | ALOX15      | arachidonate 15-lipoxygenase                                                                       | HUGO ID: 433/UniProt ID: P16050/                                                                                                      |
| 2628.1       | 2628           | GATM        | glycine amidinotransferase (L-arginine:glycine amidinotransferase)                                 | HUGO ID: 4175/UniProt ID: P50440/                                                                                                     |
| 1890.1       | 1890           | ECGF1       | endothelial cell growth factor 1 (platelet-derived)                                                | HUGO ID: 3148/UniProt ID: P19971/                                                                                                     |
| 8277.1       | 8277           | TKTL1       | transketolase-like 1                                                                               | Locus type: gene with protein product, function known or inferred/Aliases: TKR, TKT2/HUGO ID: 11835/UniProt ID: P51854/               |
| 9487.1       | 9487           | PIGL        | phosphatidylinositol glycan, class L                                                               | HUGO ID: 8966/UniProt ID: Q9Y2B2/                                                                                                     |
| 9453.1       | 9453           | GGPS1       | geranylgeranyl diphosphate synthase 1                                                              |                                                                                                                                       |
| 1591.1       | 1591           | CYP24A1     | cytochrome P450, family 24, subfamily A, polypeptide 1                                             | Locus type: gene with protein product, function known or inferred/Aliases: CP24, P450-CC24/HUGO ID: 2602/UniProt ID: Q07973/          |
| 3939.1       | 3939           | LDHA        | lactate dehydrogenase A                                                                            | HUGO ID: 6535/UniProt ID: P00338/                                                                                                     |
| 2650.1       | 2650           | GCNT1       | glucosaminyl (N-acetyl) transferase 1, core 2 (beta-1,6-N-acetylglucosaminyltransferase)           |                                                                                                                                       |
| 10797.1      | 10797          | MTHFD2      | methylene tetrahydrofolate dehydrogenase (NAD+ dependent), methenyltetrahydrofolate cyclohydrolase |                                                                                                                                       |
| 131.1        | 131            | ADH7        | alcohol dehydrogenase 7 (class IV), mu or sigma polypeptide                                        | Locus type: gene with protein product, function known or inferred/Aliases: ADH-4/HUGO ID: 256/UniProt ID: P40394/                     |
| 6718.1       | 6718           | AKR1D1      | aldo-keto reductase family 1, member D1 (delta 4-3-ketosteroid-5-beta-reductase)                   |                                                                                                                                       |
| 1537.1       | 1537           | CYC1        | cytochrome c-1                                                                                     | Locus type: gene with protein product, function known or inferred/HUGO ID: 2579/UniProt ID: P08574/                                   |
| 3620.1       | 3620           | INDO        | indoleamine-pyrrole 2,3 dioxygenase                                                                |                                                                                                                                       |
| 2673.1       | 2673           | GFPT1       | glutamine-fructose-6-phosphate transaminase 1                                                      | Aliases: GFAT, GFA, GFAT1/HUGO ID: 4241/UniProt ID: Q06210/                                                                           |
| 3417.1       | 3417           | IDH1        | isocitrate dehydrogenase 1 (NADP+), soluble                                                        | HUGO ID: 5382/UniProt ID: O75874/                                                                                                     |
| 55967.1      | 55967          | DAP13       | 13kDa differentiation-associated protein                                                           | transcript: NM_018838                                                                                                                 |
| 4536.1       | 4536           | MTND2       | NADH dehydrogenase 2                                                                               | HUGO ID: 7456/UniProt ID: P03891/                                                                                                     |
| 5336.1       | 5336           | PLCG2       | phospholipase C, gamma 2 (phosphatidylinositol-specific)                                           | HUGO ID: 9066/UniProt ID: P16885/                                                                                                     |
| 1723.1       | 1723           | DHODH       | dihydroorotate dehydrogenase                                                                       | HUGO ID: 2867/UniProt ID: Q02127/                                                                                                     |
| 38.1         | 38             | ACAT1       | acetyl-Coenzyme A acetyltransferase 1 (acetoacetyl Coenzyme A thiolase)                            | Aliases: THIL/HUGO ID: 93/UniProt ID: P24752/                                                                                         |
| 98.1         | 98             | ACYP2       | acylphosphatase 2, muscle type                                                                     | HUGO ID: 180/UniProt ID: P14621/transcript: NM_138448.2                                                                               |
| 1586.1       | 1586           | CYP17A1     | cytochrome P450, family 17, subfamily A, polypeptide 1                                             | Locus type: gene with protein product, function known or inferred/Aliases: P450C17, CPT7, S17AH/HUGO ID: 2593/UniProt ID: P05093/     |
| 1349.1       | 1349           | COX7B       | cytochrome c oxidase subunit VIIb                                                                  | HUGO ID: 2291/UniProt ID: P24311/                                                                                                     |
| 230.1        | 230            | ALDOC       | aldolase C, fructose-bisphosphate                                                                  | HUGO ID: 418/UniProt ID: P09972/                                                                                                      |
| 6646.1       | 6646           | SOAT1       | sterol O-acyltransferase (acyl-Coenzyme A: cholesterol acyltransferase) 1                          | Aliases: ACAT/HUGO ID: 11177/UniProt ID: P35610/                                                                                      |
| 4722.1       | 4722           | NDUFS3      | NADH dehydrogenase (ubiquinone) Fe-S protein 3, 30kDa (NADH-coenzyme Q reductase)                  | HUGO ID: 7710/UniProt ID: O75489/                                                                                                     |
| 5409.1       | 5409           | PNMT        | phenylethanolamine N-methyltransferase                                                             | HUGO ID: 9160/UniProt ID: P11086/                                                                                                     |
| 277.1        | 277            | AMY1B       | amylase, alpha 1B; salivary                                                                        | Locus type: unknown/HUGO ID: 475/                                                                                                     |
| 5211.1       | 5211           | PFKL        | phosphofructokinase, liver                                                                         | HUGO ID: 8876/UniProt ID: P17858/                                                                                                     |
| 5833.1       | 5833           | PCYT2       | phosphate cytidylyltransferase 2, ethanolamine                                                     | Aliases: ET/HUGO ID: 8756/UniProt ID: Q99447/                                                                                         |
| 8288.1       | 8288           | EPX         | eosinophil peroxidase                                                                              |                                                                                                                                       |
| 27089.1      | 27089          | QP-C        | low molecular mass ubiquinone-binding protein (9.5kD)                                              | transcript: NM_014402                                                                                                                 |
| 7941.1       | 7941           | PLA2G7      | phospholipase A2, group VII (platelet-activating factor acetylhydrolase, plasma)                   |                                                                                                                                       |
| 10090.1      | 10090          | UST         | uronyl-2-sulfotransferase                                                                          | HUGO ID: 17223/UniProt ID: Q9Y2C2/                                                                                                    |
| 759.1        | 759            | CA1         | carbonic anhydrase I                                                                               | HUGO ID: 1368/UniProt ID: P00915/                                                                                                     |
| 10768.1      | 10768          | AHCYL1      | S-adenosylhomocysteine hydrolase-like 1                                                            | Aliases: XPVKONA/HUGO ID: 344/UniProt ID: O43865/                                                                                     |
| 4695.1       | 4695           | NDUFA2      | NADH dehydrogenase (ubiquinone) 1 alpha subcomplex, 2, 8kDa                                        |                                                                                                                                       |
| 5288.1       | 5288           | PIK3C2G     | phosphoinositide-3-kinase, class 2, gamma polypeptide                                              | Locus type: gene with protein product, function known or inferred/HUGO ID: 8973/UniProt ID: O75747/                                   |
| 29958.1      | 29958          | DMGDH       | dimethylglycine dehydrogenase precursor                                                            | *PubMed                                                                                                                               |
| 2639.1       | 2639           | GCDH        | glutaryl-Coenzyme A dehydrogenase                                                                  |                                                                                                                                       |
| 1544.1       | 1544           | CYP1A2      | cytochrome P450, family 1, subfamily A, polypeptide 2                                              | Locus type: gene with protein product, function known or inferred/Aliases: P450, CP12/HUGO ID: 2596/UniProt ID: P05177/MGD ID: 88589/ |
| 4191.1       | 4191           | MDH2        | malate dehydrogenase 2, NAD (mitochondrial)                                                        | HUGO ID: 6971/UniProt ID: P40926/                                                                                                     |
| 2987.1       | 2987           | GUK1        | guanylate kinase 1                                                                                 | Locus type: gene with protein product, function known or inferred/HUGO ID: 4693/UniProt ID: Q16774/                                   |
| 247.1        | 247            | ALOX15B     | arachidonate 15-lipoxygenase, second type                                                          | HUGO ID: 434/UniProt ID: O15296/                                                                                                      |

| Abbreviation | Entrez Gene ID | Gene Symbol | Putative Function                                                                                                            | Additional notes                                                                                                                          |
|--------------|----------------|-------------|------------------------------------------------------------------------------------------------------------------------------|-------------------------------------------------------------------------------------------------------------------------------------------|
| 525.1        | 525            | ATP6V1B1    | ATPase, H+ transporting, lysosomal 56/58kDa, V1 subunit B, isoform 1 (Renal tubular acidosis with deafness)                  |                                                                                                                                           |
| 55512.1      | 55512          | SMPD3       | sphingomyelin phosphodiesterase 3, neutral membrane (neutral sphingomyelinase II)                                            | Locus type: gene with protein product, function known or inferred/Aliases: NSMASE2/HUGO ID: 14240/UniProt ID: Q9NY59/                     |
| 28.1         | 28             | ABO         | ABO blood group (transferase A, alpha 1-3-N-acetylgalactosaminyltransferase; transferase B, alpha 1-3-galactosyltransferase) | HUGO ID: 79/UniProt ID: P16442/                                                                                                           |
| 790.1        | 790            | CAD1        | carbamoyl-phosphate synthetase 2, aspartate transcarbamylase, and dihydroorotase                                             |                                                                                                                                           |
| 5805.1       | 5805           | PTS         | 6-pyruvoyltetrahydropterin synthase                                                                                          | HUGO ID: 9689/UniProt ID: Q03393/                                                                                                         |
| 952.1        | 952            | CD38        | CD38 antigen (p45)                                                                                                           | HUGO ID: 1667/UniProt ID: P28907/                                                                                                         |
| 8604.1       | 8604           | SLC25A12    | solute carrier family 25 (mitochondrial carrier, Aralar), member 12                                                          |                                                                                                                                           |
| 8402.1       | 8402           | SLC25A11    | solute carrier family 25 (mitochondrial carrier; oxoglutarate carrier), member 11                                            |                                                                                                                                           |
| 6576.1       | 6576           | SLC25A1     | solute carrier family 25 (mitochondrial carrier; citrate transporter), member 1                                              | Aliases: CTP/HUGO ID: 10979/UniProt ID: P53007/                                                                                           |
| 83884.1      | 83884          | SLC25A2     | solute carrier family 25 (mitochondrial carrier; ornithine transporter) member 2                                             | Locus type: gene with protein product, function known or inferred/Aliases: ORNT2/HUGO ID: 22921/UniProt ID: Q9BX12/                       |
| 9016.1       | 9016           | UCP5        | solute carrier family 25 (mitochondrial carrier, brain), member 14                                                           | Locus type: gene with protein product, function known or inferred/Aliases: BMCPI, UCP5/HUGO ID: 10984/UniProt ID: Q95258/                 |
| 1468.1       | 1468           | SLC25A10    | solute carrier family 25 (mitochondrial carrier; dicarboxylate transporter), member 10                                       |                                                                                                                                           |
| 57678.1      | 57678          | KIAA1560    | glycerol 3-phosphate acyltransferase, mitochondrial                                                                          |                                                                                                                                           |
| 5250.1       | 5250           | SLC25A3     | solute carrier family 25 (mitochondrial carrier; phosphate carrier), member 3                                                | Locus type: gene with protein product, function known or inferred/HUGO ID: 10989/UniProt ID: Q00325/                                      |
| 6648.1       | 6648           | SOD2        | superoxide dismutase 2, mitochondrial                                                                                        | Locus type: gene with protein product, function known or inferred/HUGO ID: 11180/UniProt ID: P04179/                                      |
| 7350.1       | 7350           | UCP1        | uncoupling protein 1 (mitochondrial, proton carrier)                                                                         | Aliases: SLC25A7/HUGO ID: 12517/UniProt ID: P25874/                                                                                       |
| 7351.1       | 7351           | UCP2        | uncoupling protein 2 (mitochondrial, proton carrier)                                                                         | Aliases: SLC25A8/HUGO ID: 12518/UniProt ID: P55851/                                                                                       |
| 89874.1      | 89874          | SLC25A21    | solute carrier family 25 (mitochondrial oxodicarboxylate carrier), member 21                                                 | Aliases: ODC1/HUGO ID: 14411/UniProt ID: Q9BQT8/                                                                                          |
| 7352.1       | 7352           | UCP3        | uncoupling protein 3 (mitochondrial, proton carrier)                                                                         |                                                                                                                                           |
| 291.1        | 291            | SLC25A4     | solute carrier family 25 (mitochondrial carrier; adenine nucleotide translocator), member 4                                  | Locus type: gene with protein product, function known or inferred/Aliases: T1/HUGO ID: 10990/UniProt ID: P12235/                          |
| 10166.1      | 10166          | SLC25A15    | solute carrier family 25 (mitochondrial carrier; ornithine transporter) member 15                                            | Aliases: D13S327, HHH/HUGO ID: 10985/UniProt ID: Q9Y619/                                                                                  |
| 292.1        | 292            | SLC25A5     | solute carrier family 25 (mitochondrial carrier; adenine nucleotide translocator), member 5                                  |                                                                                                                                           |
| 293.1        | 293            | SLC25A6     | solute carrier family 25 (mitochondrial carrier; adenine nucleotide translocator), member 6                                  | Locus type: gene with protein product, function known or inferred/Aliases: ANT3Y, MGC17525/HUGO ID: 10992/UniProt ID: P12236/             |
| 83733.1      | 83733          | SLC25A18    | solute carrier family 25 (mitochondrial carrier), member 18                                                                  | HUGO ID: 10988/UniProt ID: Q9H1K4/                                                                                                        |
| 56953.1      | 56953          | NT5M        | 5',3'-nucleotidase, mitochondrial                                                                                            | Aliases: dNT-2, dNT2, mdN/HUGO ID: 15769/UniProt ID: Q9NPB1/                                                                              |
| 79751.1      | 79751          | SLC25A22    | solute carrier family 25 (mitochondrial carrier: glutamate), member 22                                                       | Locus type: gene with protein product, function known or inferred/Aliases: GC1, FLJ13044/HUGO ID: 19954/UniProt ID: Q9H936/               |
| 60386.1      | 60386          | SLC25A19    | solute carrier family 25 (mitochondrial deoxynucleotide carrier), member 19                                                  |                                                                                                                                           |
| 8034.1       | 8034           | SLC25A16    | solute carrier family 25 (mitochondrial carrier; Graves disease autoantigen), member 16                                      |                                                                                                                                           |
| 51079.1      | 51079          | GRIM19      | cell death-regulatory protein GRIM19                                                                                         | transcript: NM_015965                                                                                                                     |
| 10587.1      | 10587          | TXNRD2      | thioredoxin reductase 2                                                                                                      |                                                                                                                                           |
| 10935.1      | 10935          | PRDX3       | peroxiredoxin 3                                                                                                              |                                                                                                                                           |
| 64087.1      | 64087          | MCC2        | methylcrotonoyl-Coenzyme A carboxylase 2 (beta)                                                                              | Aliases: MCCB/HUGO ID: 6937/UniProt ID: Q9HCC0/                                                                                           |
| 2653.1       | 2653           | GCSH        | glycine cleavage system protein H (aminomethyl carrier)                                                                      | HUGO ID: 4208/UniProt ID: P23434/                                                                                                         |
| 9481.1       | 9481           | UCP4        | uncoupling protein 4                                                                                                         |                                                                                                                                           |
| 27034.1      | 27034          | ACAD8       | acyl-Coenzyme A dehydrogenase family, member 8                                                                               | HUGO ID: 87/UniProt ID: Q9UKU7/                                                                                                           |
| 64902.1      | 64902          | AGXT2       | alanine-glyoxylate aminotransferase 2                                                                                        | HUGO ID: 14412/UniProt ID: Q9BYV1/                                                                                                        |
| 788.1        | 788            | SLC25A20    | solute carrier family 25 (carnitine/acylcarnitine translocase), member 20                                                    |                                                                                                                                           |
| 51805.1      | 51805          | COQ3        | coenzyme Q3 homolog, methyltransferase (yeast)                                                                               | Locus type: gene with protein product, function known or inferred/Aliases: bA9819.1/HUGO ID: 18175/UniProt ID: Q9NZ16/MGD ID: MGI:101813/ |
| 23600.1      | 23600          | AMACR       | alpha-methylacyl-CoA racemase                                                                                                | Aliases: RACE/HUGO ID: 451/UniProt ID: Q9UHK6/                                                                                            |
| 2747.1       | 2747           | GLUD2       | glutamate dehydrogenase 2                                                                                                    |                                                                                                                                           |
| 2110.1       | 2110           | ETFDH       | electron-transferring-flavoprotein dehydrogenase                                                                             | Aliases: ETFQO/HUGO ID: 3483/UniProt ID: Q16134/                                                                                          |
| 6342.1       | 6342           | SCP2        | sterol carrier protein 2                                                                                                     |                                                                                                                                           |
| 10165.1      | 10165          | SLC25A13    | solute carrier family 25, member 13 (citrin)                                                                                 | HUGO ID: 10983/UniProt ID: Q9UJS0/                                                                                                        |
| 10229.1      | 10229          | COQ7        | coenzyme Q7 homolog, ubiquinone (yeast)                                                                                      |                                                                                                                                           |
| 79814.1      | 79814          | AGMAT       | agmatine ureohydrolase (agmatinase)                                                                                          | Aliases: FLJ23384/HUGO ID: 18407/UniProt ID: Q9BSE5/                                                                                      |
| 11112.1      | 11112          | HIBADH      | 3-hydroxyisobutyrate dehydrogenase                                                                                           | HUGO ID: 4907/UniProt ID: P31937/                                                                                                         |
| 5232.1       | 5232           | PGK2        | phosphoglycerate kinase 2                                                                                                    |                                                                                                                                           |
| 92579.1      | 92579          | G6PC3       | glucose 6 phosphatase, catalytic, 3                                                                                          |                                                                                                                                           |

| Abbreviation | Entrez Gene ID | Gene Symbol   | Putative Function                                                                                                               | Additional notes                                                                                                                                                   |
|--------------|----------------|---------------|---------------------------------------------------------------------------------------------------------------------------------|--------------------------------------------------------------------------------------------------------------------------------------------------------------------|
| 85365.1      | 85365          | ALG2          | asparagine-linked glycosylation 2 homolog (yeast, alpha-1,3-mannosyltransferase)                                                | Locus type: gene with protein product, function known or inferred/Aliases: CDGH, FLJ14511, hALPG2/HUGO ID: 23159/UniProt ID: Q8NBX2/                               |
| 8818.1       | 8818           | DPM2          | dolichyl-phosphate mannosyltransferase polypeptide 2, regulatory subunit                                                        | Locus type: gene with protein product, function known or inferred/HUGO ID: 3006/UniProt ID: O94777/                                                                |
| 54344.1      | 54344          | DPM3          | dolichyl-phosphate mannosyltransferase polypeptide 3                                                                            | Locus type: gene with protein product, function known or inferred/HUGO ID: 3007/UniProt ID: Q9P2X0/                                                                |
| 79087.1      | 79087          | ALG12         | asparagine-linked glycosylation 12 homolog (yeast, alpha-1,6-mannosyltransferase)                                               | Locus type: gene with protein product, function known or inferred/Aliases: ECM39/HUGO ID: 19358/UniProt ID: Q96AA4/MGD ID: MGI:2385025/                            |
| 29929.1      | 29929          | ALG6          | asparagine-linked glycosylation 6 homolog (yeast, alpha-1,3-glucosyltransferase)                                                |                                                                                                                                                                    |
| 79053.1      | 79053          | ALG8          | asparagine-linked glycosylation 8 homolog (yeast, alpha-1,3-glucosyltransferase)                                                | Locus type: gene with protein product, function known or inferred/Aliases: MGC2840/HUGO ID: 23161/UniProt ID: Q9BVK2/                                              |
| 84920.1      | 84920          | ALG10         | asparagine-linked glycosylation 10 homolog (yeast, alpha-1,3-glucosyltransferase)                                               | Locus type: gene with protein product, function known or inferred/Aliases: FLJ14751/HUGO ID: 23162/UniProt ID: Q96DU0/                                             |
| 8801.1       | 8801           | SUCLG2        | succinate-CoA ligase, GDP-forming, beta subunit                                                                                 | Locus type: gene with protein product, function known or inferred/HUGO ID: 11450/UniProt ID: Q96199/                                                               |
| 22934.1      | 22934          | RPIA          | ribose 5-phosphate isomerase A (ribose 5-phosphate epimerase)                                                                   | HUGO ID: 10297/UniProt ID: P49247/                                                                                                                                 |
| 84076.1      | 84076          | DKFZP434L1717 | similar to transketolase                                                                                                        | transcript: NM_032136                                                                                                                                              |
| 126328.1     | 126328         | NDUFA11       | NADH dehydrogenase (ubiquinone) 1 alpha subcomplex, 11, 14.7kDa                                                                 | Locus type: gene with protein product, function known or inferred/Aliases: B14.7/HUGO ID: 20371/UniProt ID: Q86Y39/                                                |
| 29796.1      | 29796          | HSPC051       | ubiquinol-cytochrome c reductase complex (7.2 kD)                                                                               | transcript: NM_013387                                                                                                                                              |
| 10905.1      | 10905          | MAN1A2        | mannosidase, alpha, class 1A, member 2                                                                                          | Aliases: MAN1B/HUGO ID: 6822/UniProt ID: O60476/                                                                                                                   |
| 57134.1      | 57134          | MAN1C1        | mannosidase, alpha, class 1C, member 1                                                                                          | Aliases: HMIC/HUGO ID: 19080/UniProt ID: Q9NR34/MGD ID: MGI:2446214/                                                                                               |
| 11320.1      | 11320          | MGAT4A        | mannosyl (alpha-1,3-)-glycoprotein beta-1,4-N-acetylglucosaminyltransferase, isoenzyme A                                        | Aliases: GnT-Iva/HUGO ID: 7047/UniProt ID: Q9UM21/                                                                                                                 |
| 11282.1      | 11282          | MGAT4B        | mannosyl (alpha-1,3-)-glycoprotein beta-1,4-N-acetylglucosaminyltransferase, isoenzyme B                                        | Locus type: gene with protein product, function known or inferred/Aliases: GnT-Ivb/HUGO ID: 7048/UniProt ID: Q9UQ53/                                               |
| 4249.1       | 4249           | MGAT5         | mannosyl (alpha-1,6-)-glycoprotein beta-1,6-N-acetylglucosaminyltransferase                                                     | Aliases: GNT-V/HUGO ID: 7049/UniProt ID: Q09328/                                                                                                                   |
| 1603.1       | 1603           | DAD1          | defender against cell death 1                                                                                                   | HUGO ID: 2664/UniProt ID: P46966/                                                                                                                                  |
| 64772.1      | 64772          | FLJ21865      | endo-beta-N-acetylglucosaminidase                                                                                               | transcript: NM_022759                                                                                                                                              |
| 5476.1       | 5476           | PPGB          | protective protein for beta-galactosidase (galactosialidosis)                                                                   | HUGO ID: 9251/UniProt ID: P10619/                                                                                                                                  |
| 129807.1     | 129807         | NEU4          | sialidase 4                                                                                                                     | Locus type: gene with protein product, function known or inferred/Aliases: NEU4/HUGO ID: 21328/UniProt ID: Q8WWR8/MGD ID: MGI:2661364/                             |
| 55568.1      | 55568          | GALNT10       | UDP-N-acetyl-alpha-D-galactosamine:polypeptide N-acetylglucosaminyltransferase 10 (GalNAc-T10)                                  | Locus type: gene with protein product, function known or inferred/Aliases: DKFZp586H0623/HUGO ID: 19873/UniProt ID: Q86SR1/                                        |
| 63917.1      | 63917          | GALNT11       | UDP-N-acetyl-alpha-D-galactosamine:polypeptide N-acetylglucosaminyltransferase 11 (GalNAc-T11)                                  | Locus type: gene with protein product, function known or inferred/Aliases: FLJ21634/HUGO ID: 19875/UniProt ID: Q8NCW6/                                             |
| 79695.1      | 79695          | GALNT12       | UDP-N-acetyl-alpha-D-galactosamine:polypeptide N-acetylglucosaminyltransferase 12 (GalNAc-T12)                                  | Locus type: gene with protein product, function known or inferred/Aliases: FLJ21212/HUGO ID: 19877/UniProt ID: Q8IXK2/                                             |
| 114805.1     | 114805         | GALNT13       | UDP-N-acetyl-alpha-D-galactosamine:polypeptide N-acetylglucosaminyltransferase 13 (GalNAc-T13)                                  |                                                                                                                                                                    |
| 79623.1      | 79623          | GALNT14       | UDP-N-acetyl-alpha-D-galactosamine:polypeptide N-acetylglucosaminyltransferase 14 (GalNAc-T14)                                  | Locus type: gene with protein product, function known or inferred/Aliases: GalNAc-T10, FLJ12691, GalNAc-T14/HUGO ID: 22946/UniProt ID: Q9H9J8/MGD ID: MGI:1918935/ |
| 11227.1      | 11227          | GALNT5        | UDP-N-acetyl-alpha-D-galactosamine:polypeptide N-acetylglucosaminyltransferase 5 (GalNAc-T5)                                    | HUGO ID: 4127/                                                                                                                                                     |
| 117248.1     | 117248         | GALNTL2       | UDP-N-acetyl-alpha-D-galactosamine:polypeptide N-acetylglucosaminyltransferase-like 2                                           |                                                                                                                                                                    |
| 55808.1      | 55808          | SIAT7A        | sialyltransferase 7 ((alpha-N-acetylneuraminyl-2,3-beta-galactosyl-1,3)-N-acetyl galactosaminide alpha-2,6-sialyltransferase) A | Locus type: gene with protein product, function known or inferred/Aliases: ST6GalNAcI/HUGO ID: 23614/UniProt ID: Q9NSC7/                                           |
| 192134.1     | 192134         | IMAGE:4907098 | beta-1,3-N-acetylglucosaminyltransferase protein                                                                                | transcript: NM_138706                                                                                                                                              |
| 9245.1       | 9245           | GCNT3         | glucosaminyl (N-acetyl) transferase 3, mucin type                                                                               |                                                                                                                                                                    |
| 51301.1      | 51301          | C2GNT3        | core 2 beta 1,6-N-acetylglucosaminyltransferase 3                                                                               | transcript: NM_016591                                                                                                                                              |
| 51146.1      | 51146          | A4GNT         | alpha-1,4-N-acetylglucosaminyltransferase                                                                                       | Locus type: gene with protein product, function unknown/Aliases: LOC51146, alpha4GnT/HUGO ID: 17968/                                                               |
| 57171.1      | 57171          | DOLPP1        | dolichyl pyrophosphate phosphatase 1                                                                                            |                                                                                                                                                                    |
| 80201.1      | 80201          | FLJ22761      | hypothetical protein FLJ22761                                                                                                   | transcript: NM_025130                                                                                                                                              |
| 113452.1     | 113452         | BCLP          | beta-casein-like protein                                                                                                        | transcript: NM_033504                                                                                                                                              |
| 348477.1     | 348477         | FLJ39207      | C219-reactive peptide                                                                                                           | transcript: XM_371369                                                                                                                                              |
| 1645.1       | 1645           | AKR1C1        | aldo-keto reductase family 1, member C1 (dihydrodiol dehydrogenase 1; 20-alpha (3-alpha)-hydroxysteroid dehydrogenase)          | Aliases: DDH, MBAB, DD1, HAKRC/HUGO ID: 384/UniProt ID: Q04828/                                                                                                    |
| 55217.1      | 55217          | TMLHE         | trimethyllysine hydroxylase, epsilon                                                                                            | Aliases: TMLH, FLJ10727/HUGO ID: 18308/UniProt ID: Q9NVH6/                                                                                                         |

| Abbreviation | Entrez Gene ID | Gene Symbol | Putative Function                                                                 | Additional notes                                                                                                                           |
|--------------|----------------|-------------|-----------------------------------------------------------------------------------|--------------------------------------------------------------------------------------------------------------------------------------------|
| 145226.1     | 145226         | RDH12       | retinol dehydrogenase 12 (all-trans and 9-cis)                                    | Locus type: gene with protein product, function known or inferred/Aliases: FLJ30273/HUGO ID: 19977/UniProt ID: Q8TAW6/                     |
| 6511.1       | 6511           | SLC1A6      | solute carrier family 1 (high affinity aspartate/glutamate transporter), member 6 | Locus type: gene with protein product, function known or inferred/Aliases: EAAT4/HUGO ID: 10944/UniProt ID: P48664/                        |
| 84889.1      | 84889          | SLC7A3      | solute carrier family 7 (cationic amino acid transporter, y+ system), member 3    | Locus type: gene with protein product, function known or inferred/Aliases: CAT-3, ATRC3, FLJ14541/HUGO ID: 11061/UniProt ID: Q8N185/       |
| 65985.1      | 65985          | AACS        | acetoacetyl-CoA synthetase                                                        | Locus type: gene with protein product, function known or inferred/Aliases: FLJ12389/HUGO ID: 21298/UniProt ID: Q81WD2/                     |
| 29906.1      | 29906          | SIAT8E      | sialyltransferase 8E (alpha-2, 8-polysialyltransferase)                           | Aliases: ST8Sia V/HUGO ID: 17827/UniProt ID: O15466/                                                                                       |
| 6550.1       | 6550           | SLC9A3      | solute carrier family 9 (sodium/hydrogen exchanger), isoform 3                    | HUGO ID: 11073/UniProt ID: P48764/                                                                                                         |
| 157506.1     | 157506         | RDH10       | retinol dehydrogenase 10 (all-trans)                                              | Locus type: gene with protein product, function known or inferred/HUGO ID: 19975/UniProt ID: Q8IZV5/                                       |
| 6005.1       | 6005           | RHAG        | Rhesus blood group-associated glycoprotein                                        | Aliases: RH50A/HUGO ID: 10006/UniProt ID: Q02094/                                                                                          |
| 56548.1      | 56548          | CHST7       | carbohydrate (N-acetylglucosamine 6-O) sulfotransferase 7                         | Aliases: C6ST-2, C6ST2/HUGO ID: 13817/UniProt ID: O75667/                                                                                  |
| 3931.1       | 3931           | LCAT        | lecithin-cholesterol acyltransferase                                              | HUGO ID: 6522/UniProt ID: P04180/                                                                                                          |
| 11309.1      | 11309          | SLCO2B1     | solute carrier organic anion transporter family, member 2B1                       | Locus type: gene with protein product, function known or inferred/Aliases: OATP-B, OATP2B1/HUGO ID: 10962/UniProt ID: O94956/              |
| 284273.1     | 284273         | ZADH2       | zinc binding alcohol dehydrogenase, domain containing 2                           | Locus type: gene with protein product, function unknown/Aliases: MGC45594/HUGO ID: 28697/MDG ID: MGI:2444835/                              |
| 6515.1       | 6515           | SLC2A3      | solute carrier family 2 (facilitated glucose transporter), member 3               | HUGO ID: 11007/UniProt ID: P11169/                                                                                                         |
| 114134.1     | 114134         | SLC2A13     | solute carrier family 2 (facilitated glucose transporter), member 13              | Aliases: HMIT/HUGO ID: 15956/UniProt ID: Q96QE2/                                                                                           |
| 2348.1       | 2348           | FOLR1       | folate receptor 1 (adult)                                                         | HUGO ID: 3791/UniProt ID: P15328/                                                                                                          |
| 93183.1      | 93183          | PIGM        | phosphatidylinositol glycan, class M                                              | HUGO ID: 18858/UniProt ID: Q9H355/MDG ID: MGI:1914806/                                                                                     |
| 54575.1      | 54575          | UGT1A10     | UDP glycosyltransferase 1 family, polypeptide A10                                 | Aliases: UGT1J/HUGO ID: 12531/UniProt ID: Q9HAW8/                                                                                          |
| 6785.1       | 6785           | ELOVL4      | elongation of very long chain fatty acids (FEN1/Elo2, SUR4/Elo3, yeast)-like 4    | HUGO ID: 14415/UniProt ID: Q9GZRS/                                                                                                         |
| 66002.1      | 66002          | CYP4F12     | cytochrome P450, family 4, subfamily F, polypeptide 12                            | Locus type: gene with protein product, function known or inferred/HUGO ID: 18857/UniProt ID: Q9HCS2/                                       |
| 4905.1       | 4905           | NSF         | N-ethylmaleimide-sensitive factor                                                 | Aliases: SKD2/HUGO ID: 8016/UniProt ID: P46459/                                                                                            |
| 142680.1     | 142680         | SLC34A3     | solute carrier family 34 (sodium phosphate), member 3                             | Locus type: gene with protein product, function known or inferred/Aliases: NPT1c, FLJ38680/HUGO ID: 20305/UniProt ID: Q8N130/              |
| 6529.1       | 6529           | SLC6A1      | solute carrier family 6 (neurotransmitter transporter, GABA), member 1            | Aliases: GAT1/HUGO ID: 11042/UniProt ID: P30531/                                                                                           |
| 126129.1     | 126129         | CPT1C       | carnitine palmitoyltransferase 1C                                                 | Locus type: gene with protein product, function known or inferred/Aliases: FLJ23809, CPT1C/HUGO ID: 18540/UniProt ID: Q8TCG5/              |
| 490.1        | 490            | ATP2B1      | ATPase, Ca++ transporting, plasma membrane 1                                      | Aliases: PMCA1/HUGO ID: 814/UniProt ID: P20020/                                                                                            |
| 11254.1      | 11254          | SLC6A14     | solute carrier family 6 (neurotransmitter transporter), member 14                 | HUGO ID: 11047/UniProt ID: Q9UN76/                                                                                                         |
| 57419.1      | 57419          | SLC24A3     | solute carrier family 24 (sodium/potassium/calcium exchanger), member 3           | Locus type: gene with protein product, function known or inferred/HUGO ID: 10977/UniProt ID: Q9HC58/                                       |
| 54675.1      | 54675          | C20orf155   | chromosome 20 open reading frame 155                                              | Aliases: dJ967N21.6/HUGO ID: 16148/                                                                                                        |
| 6542.1       | 6542           | SLC7A2      | solute carrier family 7 (cationic amino acid transporter, y+ system), member 2    | Locus type: gene with protein product, function known or inferred/Aliases: CAT-2, HCAT2/HUGO ID: 11060/UniProt ID: P52569/                 |
| 257202.1     | 257202         | GPX6        | glutathione peroxidase 6 (olfactory)                                              | HUGO ID: 4558/UniProt ID: P59796/                                                                                                          |
| 79723.1      | 79723          | SUV39H2     | suppressor of variegation 3-9 homolog 2 (Drosophila)                              | Locus type: gene with protein product, function known or inferred/Aliases: FLJ23414/HUGO ID: 17287/UniProt ID: Q9H511/MDG ID: MGI:1890396/ |
| 84912.1      | 84912          | SLC35B4     | solute carrier family 35, member B4                                               | Locus type: gene with protein product, function known or inferred/Aliases: FLJ14697, YEA4/HUGO ID: 20584/UniProt ID: Q969S0/               |
| 245972.1     | 245972         | ATP6V0D2    | ATPase, H+ transporting, lysosomal 38kDa, V0 subunit d isoform 2                  | Locus type: gene with protein product, function known or inferred/Aliases: FLJ38708, VMA6, ATP6D2/HUGO ID: 18266/UniProt ID: Q8N8Y2/       |
| 22856.1      | 22856          | CHSY1       | carbohydrate (chondroitin) synthase 1                                             | Aliases: KIAA0990/HUGO ID: 17198/UniProt ID: Q86X52/                                                                                       |
| 160851.1     | 160851         | DGKH        | diacylglycerol kinase, eta                                                        | Locus type: gene with protein product, function known or inferred/Aliases: DGKeta/HUGO ID: 2854/UniProt ID: Q9BX34/                        |
| 51302.1      | 51302          | CYP39A1     | cytochrome P450, family 39, subfamily A, polypeptide 1                            | Locus type: gene with protein product, function known or inferred/HUGO ID: 17449/UniProt ID: Q9NYL5/MDG ID: MGI:1927096/                   |
| 2544.1       | 2544           | G6PT2       | glucose-6-phosphatase, transport (phosphate/pyrophosphate) protein 2              | Locus type: unknown/Aliases: GSD1c/HUGO ID: 4062/                                                                                          |
| 374291.1     | 374291         | NDUFS7      | NADH dehydrogenase (ubiquinone) Fe-S protein 7, 20kDa (NADH-coenzyme Q reductase) | Locus type: gene with protein product, function known or inferred/Aliases: PSST, FLJ46880, FLJ45860/HUGO ID: 7714/UniProt ID: O75251/      |
| 27010.1      | 27010          | TPK1        | thiamin pyrophosphokinase 1                                                       | Aliases: HTPK1/HUGO ID: 17358/UniProt ID: Q9H3S4/                                                                                          |
| 2531.1       | 2531           | FVT1        | follicular lymphoma variant translocation 1                                       | HUGO ID: 4021/UniProt ID: Q06136/                                                                                                          |
| 222537.1     | 222537         | HS3ST5      | heparan sulfate (glucosamine) 3-O-sulfotransferase 5                              | Locus type: gene with protein product, function known or inferred/Aliases: 3-OST-5/HUGO ID: 19419/UniProt ID: Q8IZT8/                      |

| Abbreviation | Entrez Gene ID | Gene Symbol | Putative Function                                                                                      | Additional notes                                                                                                                                                 |
|--------------|----------------|-------------|--------------------------------------------------------------------------------------------------------|------------------------------------------------------------------------------------------------------------------------------------------------------------------|
| 122481.1     | 122481         | AK7         | adenylate kinase 7                                                                                     | Locus type: gene with protein product, function known or inferred/Aliases: FLJ32864/HUGO ID: 20091/UniProt ID: Q96M32/                                           |
| 6568.1       | 6568           | SLC17A1     | solute carrier family 17 (sodium phosphate), member 1                                                  | Aliases: NAPI-1/HUGO ID: 10929/UniProt ID: Q14916/                                                                                                               |
| 171425.1     | 171425         | CLYBL       | citrate lyase beta like                                                                                | Locus type: gene with protein product, function known or inferred/Aliases: CLB/HUGO ID: 18355/UniProt ID: Q8N0X4/MGD ID: MGI:1916884/                            |
| 80142.1      | 80142          | PTGES2      | prostaglandin E synthase 2                                                                             | Aliases: FLJ14038/HUGO ID: 17822/UniProt ID: Q9H7Z7/                                                                                                             |
| 127124.1     | 127124         | ATP6V1G3    | ATPase, H+ transporting, lysosomal 13kDa, V1 subunit G isoform 3                                       | Locus type: gene with protein product, function known or inferred/Aliases: ATP6G3, Vma10/HUGO ID: 18265/UniProt ID: Q96LB4/MGD ID: MGI:2450548/                  |
| 50515.1      | 50515          | CHST11      | carbohydrate (chondroitin 4) sulfotransferase 11                                                       | Locus type: gene with protein product, function known or inferred/Aliases: C4ST1, C4St-1, C4ST, HSA269537/HUGO ID: 17422/UniProt ID: Q9NPF2/MGD ID: MGI:1927166/ |
| 26062.1      | 26062          | HYALP1      | hyaluronoglucosaminidase pseudogene 1                                                                  | Locus type: pseudogene/HUGO ID: 5324/                                                                                                                            |
| 9154.1       | 9154           | SLC28A1     | solute carrier family 28 (sodium-coupled nucleoside transporter), member 1                             | Aliases: CNT1/HUGO ID: 11001/UniProt ID: O00337/                                                                                                                 |
| 79896.1      | 79896          | THNSL1      | threonine synthase-like 1 (bacterial)                                                                  | Locus type: gene with protein product, function unknown/Aliases: FLJ22002/HUGO ID: 26160/                                                                        |
| 11041.1      | 11041          | B3GNT6      | UDP-GlcNAc:betaGal beta-1,3-N-acetylglucosaminyltransferase 6                                          | Aliases: iGNT, iGAT/HUGO ID: 15685/UniProt ID: O43505/                                                                                                           |
| 6546.1       | 6546           | SLC8A1      | solute carrier family 8 (sodium/calcium exchanger), member 1                                           | HUGO ID: 11068/UniProt ID: P32418/                                                                                                                               |
| 140838.1     | 140838         | HDHD4       | haloacid dehalogenase-like hydrolase domain containing 4                                               | Locus type: gene with protein product, function known or inferred/Aliases: dj694B14.3, MGC26833/HUGO ID: 16140/UniProt ID: Q8TBE9/                               |
| 10050.1      | 10050          | SLC17A4     | solute carrier family 17 (sodium phosphate), member 4                                                  | Aliases: KAIA2138/HUGO ID: 10932/UniProt ID: Q9Y2C5/                                                                                                             |
| 56848.1      | 56848          | SPHK2       | sphingosine kinase 2                                                                                   | HUGO ID: 18859/UniProt ID: Q9NRA0/MGD ID: MGI:1861380/                                                                                                           |
| 246213.1     | 246213         | SLC17A8     | solute carrier family 17 (sodium-dependent inorganic phosphate cotransporter), member 8                | Locus type: gene with protein product, function known or inferred/Aliases: VGLUT3/HUGO ID: 20151/UniProt ID: Q8NDX2/                                             |
| 2745.1       | 2745           | GLRX        | glutaredoxin (thioltransferase)                                                                        | Aliases: GRX/HUGO ID: 4330/UniProt ID: P35754/                                                                                                                   |
| 6533.1       | 6533           | SLC6A6      | solute carrier family 6 (neurotransmitter transporter, taurine), member 6                              | Aliases: TAUT/HUGO ID: 11052/UniProt ID: P31641/                                                                                                                 |
| 91734.1      | 91734          | IDI2        | isopentenyl-diphosphate delta isomerase 2                                                              | Locus type: gene with protein product, function known or inferred/Aliases: IPP2/HUGO ID: 23487/UniProt ID: Q9BXS1/                                               |
| 5295.1       | 5295           | PIK3R1      | phosphoinositide-3-kinase, regulatory subunit 1 (p85 alpha)                                            | Locus type: gene with protein product, function known or inferred/Aliases: GRB1, p85-ALPHA HUGO ID: 8979/UniProt ID: P27986/                                     |
| 6507.1       | 6507           | SLC1A3      | solute carrier family 1 (glial high affinity glutamate transporter), member 3                          | Aliases: GLAST, EAAT1/HUGO ID: 10941/UniProt ID: P43003/                                                                                                         |
| 80271.1      | 80271          | ITPKC       | inositol 1,4,5-trisphosphate 3-kinase C                                                                | HUGO ID: 14897/UniProt ID: Q96DU7/                                                                                                                               |
| 80724.1      | 80724          | ACAD10      | acyl-Coenzyme A dehydrogenase family, member 10                                                        | Locus type: gene with protein product, function unknown/Aliases: MGC5601/HUGO ID: 21597/                                                                         |
| 84264.1      | 84264          | HAGHL       | hydroxyacylglutathione hydrolase-like                                                                  | Locus type: gene with protein product, function known or inferred/Aliases: MGC2605/HUGO ID: 14177/UniProt ID: Q9BT45/                                            |
| 65263.1      | 65263          | PYCR1       | pyrroline-5-carboxylate reductase-like                                                                 | Locus type: gene with protein product, function unknown/Aliases: FLJ13852/HUGO ID: 25846/                                                                        |
| 123041.1     | 123041         | SLC24A4     | solute carrier family 24 (sodium/potassium/calcium exchanger), member 4                                | Locus type: gene with protein product, function known or inferred/Aliases: NCKX4/HUGO ID: 10978/UniProt ID: Q8NFF2/                                              |
| 6572.1       | 6572           | SLC18A3     | solute carrier family 18 (vesicular acetylcholine), member 3                                           | Locus type: gene with protein product, function known or inferred/Aliases: VACHT/HUGO ID: 10936/UniProt ID: Q16572/                                              |
| 5728.1       | 5728           | PTEN        | phosphatase and tensin homolog (mutated in multiple advanced cancers 1)                                | Locus type: gene with protein product, function known or inferred/Aliases: MMAC1, TEP1, PTEN1/HUGO ID: 9588/UniProt ID: O00633/                                  |
| 6537.1       | 6537           | SLC6A10     | solute carrier family 6 (neurotransmitter transporter, creatine), member 10                            | Aliases: CT-2/HUGO ID: 11043/UniProt ID: P53796/                                                                                                                 |
| 5283.1       | 5283           | PIGH        | phosphatidylinositol glycan, class H                                                                   | Aliases: GPI-H/HUGO ID: 8964/UniProt ID: Q14442/                                                                                                                 |
| 5092.1       | 5092           | PCBD        | 6-pyruvoyl-tetrahydropterin synthase/dimerization cofactor of hepatocyte nuclear factor 1 alpha (TCF1) | Locus type: gene with protein product, function known or inferred/Aliases: PCD/HUGO ID: 8646/UniProt ID: P80095/                                                 |
| 124935.1     | 124935         | SLC43A2     | solute carrier family 43, member 2                                                                     | Locus type: gene with protein product, function known or inferred/Aliases: MGC34680/HUGO ID: 23087/MGD ID: MGI:2442746/                                          |
| 55501.1      | 55501          | CHST12      | carbohydrate (chondroitin 4) sulfotransferase 12                                                       | Locus type: gene with protein product, function known or inferred/Aliases: C4S-2, C4ST2/HUGO ID: 17423/UniProt ID: Q9NRB3/MGD ID: MGI:1929064/                   |
| 6559.1       | 6559           | SLC12A3     | solute carrier family 12 (sodium/chloride transporters), member 3                                      | HUGO ID: 10912/UniProt ID: P55017/                                                                                                                               |
| 6520.1       | 6520           | SLC3A2      | solute carrier family 3 (activators of dibasic and neutral amino acid transport), member 2             | Aliases: 4T2HC, 4F2, NACAE/HUGO ID: 11026/UniProt ID: P08195/                                                                                                    |
| 6563.1       | 6563           | SLC14A1     | solute carrier family 14 (urea transporter), member 1 (Kidd blood group)                               | Locus type: gene with protein product, function known or inferred/Aliases: HST1341/HUGO ID: 10918/UniProt ID: Q13336/                                            |
| 28976.1      | 28976          | ACAD9       | acyl-Coenzyme A dehydrogenase family, member 9                                                         | Locus type: gene with protein product, function known or inferred/Aliases: NPD002, MGC14452/HUGO ID: 21497/UniProt ID: Q9H845/                                   |
| 883.1        | 883            | CCBL1       | cysteine conjugate-beta lyase; cytoplasmic (glutamine transaminase K, kynurenine aminotransferase)     | HUGO ID: 1564/UniProt ID: Q16773/                                                                                                                                |

| Abbreviation | Entrez Gene ID | Gene Symbol | Putative Function                                                                          | Additional notes                                                                                                                                                                   |
|--------------|----------------|-------------|--------------------------------------------------------------------------------------------|------------------------------------------------------------------------------------------------------------------------------------------------------------------------------------|
| 10919.1      | 10919          | BAT8        | HLA-B associated transcript 8                                                              | Locus type: gene with protein product, function unknown/Aliases: G9A, Em:AF134726.3, HGNC:13942/HUGO ID: 14129/UniProt ID: Q96KQ7/                                                 |
| 221823.1     | 221823         | PRPS1L1     | phosphoribosyl pyrophosphate synthetase 1-like 1                                           | Locus type: gene with protein product, function known or inferred/Aliases: PRPS3/HUGO ID: 9463/UniProt ID: P21108/                                                                 |
| 89869.1      | 89869          | PLCZ1       | phospholipase C, zeta 1                                                                    | Aliases: NYD-SP27/HUGO ID: 19218/UniProt ID: Q86YW0/                                                                                                                               |
| 6524.1       | 6524           | SLC5A2      | solute carrier family 5 (sodium/glucose cotransporter), member 2                           | HUGO ID: 11037/UniProt ID: P31639/                                                                                                                                                 |
| 9869.1       | 9869           | SETDB1      | SET domain, bifurcated 1                                                                   | Aliases: KG1T, KIAA0067, ESET/HUGO ID: 10761/UniProt ID: Q15047/                                                                                                                   |
| 11001.1      | 11001          | SLC27A2     | solute carrier family 27 (fatty acid transporter), member 2                                | Locus type: gene with protein product, function known or inferred/Aliases: FATP2, HGNC:3572, hFACVL1, VLACS, VLCS, HsT17226/HUGO ID: 10996/UniProt ID: O14975/MGD ID: MGI:1347099/ |
| 23657.1      | 23657          | SLC7A11     | solute carrier family 7, (cationic amino acid transporter, y+ system) member 11            | Aliases: xCT/HUGO ID: 11059/UniProt ID: Q9UPY5/                                                                                                                                    |
| 6839.1       | 6839           | SUV39H1     | suppressor of variegation 3-9 homolog 1 (Drosophila)                                       | Locus type: gene with protein product, function known or inferred/HUGO ID: 11479/UniProt ID: O43463/                                                                               |
| 4845.1       | 4845           | NOS2C       | nitric oxide synthase 2C                                                                   | Locus type: gene with protein product, function known or inferred/HUGO ID: 7875/UniProt ID: Q14961/                                                                                |
| 53919.1      | 53919          | SLCO1C1     | solute carrier organic anion transporter family, member 1C1                                | Locus type: gene with protein product, function known or inferred/Aliases: OATP-F, OATP1C1, OATP1/HUGO ID: 13819/UniProt ID: Q9NBY5/                                               |
| 6555.1       | 6555           | SLC10A2     | solute carrier family 10 (sodium/bile acid cotransporter family), member 2                 | Locus type: gene with protein product, function known or inferred/HUGO ID: 10906/UniProt ID: Q12908/                                                                               |
| 80168.1      | 80168          | MOGAT2      | monoacylglycerol O-acyltransferase 2                                                       | Locus type: gene with protein product, function known or inferred/Aliases: MGAT2, DGAT2L5, FLJ22644/HUGO ID: 23248/                                                                |
| 155184.1     | 155184         | SLC2A7      | solute carrier family 2 (facilitated glucose transporter), member 7                        | HUGO ID: 13445/                                                                                                                                                                    |
| 9197.1       | 9197           | SLC33A1     | solute carrier family 33 (acetyl-CoA transporter), member 1                                | Aliases: AT-1/HUGO ID: 95/UniProt ID: O00400/                                                                                                                                      |
| 9056.1       | 9056           | SLC7A7      | solute carrier family 7 (cationic amino acid transporter, y+ system), member 7             | Aliases: y+LAT-1/HUGO ID: 11065/UniProt ID: Q9UM01/                                                                                                                                |
| 26873.1      | 26873          | OPLAH       | 5-oxoprolinase (ATP-hydrolysing)                                                           | Aliases: OPLA, 5-Opase/HUGO ID: 8149/UniProt ID: O14841/                                                                                                                           |
| 28234.1      | 28234          | SLCO1B3     | solute carrier organic anion transporter family, member 1B3                                | Locus type: gene with protein product, function known or inferred/Aliases: OATP8, OATP1B3/HUGO ID: 10961/UniProt ID: Q9NPD5/                                                       |
| 50700.1      | 50700          | RDH8        | retinol dehydrogenase 8 (all-trans)                                                        | Locus type: gene with protein product, function known or inferred/Aliases: PRRDH/HUGO ID: 14423/UniProt ID: Q9N9R8/                                                                |
| 57665.1      | 57665          | RDH14       | retinol dehydrogenase 14 (all-trans and 9-cis)                                             | Locus type: gene with protein product, function known or inferred/Aliases: PAN2/HUGO ID: 19979/UniProt ID: Q9HBH5/                                                                 |
| 57282.1      | 57282          | SLC4A10     | solute carrier family 4, sodium bicarbonate transporter-like, member 10                    | HUGO ID: 13811/UniProt ID: Q9HCQ6/                                                                                                                                                 |
| 374907.1     | 374907         | B3GALT7     | UDP-Gal:betaGal beta 1,3-galactosyltransferase polypeptide 7                               | Locus type: gene with protein product, function known or inferred/Aliases: BGALT15/HUGO ID: 24139/                                                                                 |
| 119391.1     | 119391         | GSTO2       | glutathione S-transferase omega 2                                                          | Locus type: gene with protein product, function known or inferred/HUGO ID: 23064/                                                                                                  |
| 8869.1       | 8869           | SIAT9       | sialyltransferase 9 (CMP-NeuAc:lactosylceramide alpha-2,3-sialyltransferase; GM3 synthase) | Aliases: ST3GalV, SIATGM3S/HUGO ID: 10872/UniProt ID: Q9UNP4/                                                                                                                      |
| 55229.1      | 55229          | PANK4       | pantothenate kinase 4                                                                      | Locus type: gene with protein product, function known or inferred/Aliases: FLJ10782/HUGO ID: 19366/UniProt ID: Q9NVE7/                                                             |
| 23539.1      | 23539          | SLC16A8     | solute carrier 16 (monocarboxylic acid transporters), member 8                             | Aliases: MCT3/HUGO ID: 16270/UniProt ID: O95907/                                                                                                                                   |
| 140679.1     | 140679         | SLC32A1     | solute carrier family 32 (GABA vesicular transporter), member 1                            | Locus type: gene with protein product, function known or inferred/Aliases: VGAT, bA12201.1, HGNC:15800/HUGO ID: 11018/                                                             |
| 6528.1       | 6528           | SLC5A5      | solute carrier family 5 (sodium iodide symporter), member 5                                | Aliases: NIS/HUGO ID: 11040/UniProt ID: Q92911/                                                                                                                                    |
| 57127.1      | 57127          | RHBG        | Rhesus blood group, B glycoprotein                                                         | HUGO ID: 14572/UniProt ID: Q9H310/                                                                                                                                                 |
| 122622.1     | 122622         | ADSSL1      | adenylosuccinate synthase like 1                                                           | Locus type: gene with protein product, function unknown/Aliases: FLJ38602/HUGO ID: 20093/UniProt ID: Q8N714/                                                                       |
| 160287.1     | 160287         | LDHAL6A     | lactate dehydrogenase A-like 6A                                                            | Locus type: gene with protein product, function unknown/Aliases: MGC23940/HUGO ID: 28335/                                                                                          |
| 284111.1     | 284111         | SLC13A5     | solute carrier family 13 (sodium-dependent citrate transporter), member 5                  | Locus type: gene with protein product, function known or inferred/Aliases: NACT/HUGO ID: 23089/UniProt ID: Q86YT5/                                                                 |
| 29920.1      | 29920          | PYCR2       | pyrroline-5-carboxylate reductase family, member 2                                         | Locus type: gene with protein product, function known or inferred/Aliases: P5CR2/HUGO ID: 30262/                                                                                   |
| 80146.1      | 80146          | UXS1        | UDP-glucuronate decarboxylase 1                                                            | Aliases: FLJ23591/HUGO ID: 17729/UniProt ID: Q8NBX3/                                                                                                                               |
| 51540.1      | 51540          | SCLY        | selenocysteine lyase                                                                       | Locus type: gene with protein product, function known or inferred/Aliases: SCLY, SCL/HUGO ID: 18161/MGD ID: MGI:1355310/                                                           |
| 257068.1     | 257068         | PLCXD2      | phosphatidylinositol-specific phospholipase C, X domain containing 2                       | Locus type: gene with protein product, function unknown/Aliases: FLJ31579/HUGO ID: 26462/                                                                                          |
| 54981.1      | 54981          | C9orf95     | chromosome 9 open reading frame 95                                                         | Locus type: gene with protein product, function unknown/Aliases: FLJ20559, NRK1, bA235014.2/HUGO ID: 26057/                                                                        |
| 130752.1     | 130752         | MDH1B       | malate dehydrogenase 1B, NAD (soluble)                                                     | Aliases: FLJ25341, RP11-95H11/HUGO ID: 17836/UniProt ID: Q8IV51/                                                                                                                   |
| 112611.1     | 112611         | RWDD2       | RWD domain containing 2                                                                    | Locus type: gene with protein product, function unknown/Aliases: MGC13523, dJ747H23.2/HUGO ID: 21385/UniProt ID: Q9UYI3/MGD ID: MGI:1916769/                                       |



| Abbreviation | Entrez Gene ID | Gene Symbol | Putative Function                                                                      | Additional notes                                                                                                                                 |
|--------------|----------------|-------------|----------------------------------------------------------------------------------------|--------------------------------------------------------------------------------------------------------------------------------------------------|
| 81537.1      | 81537          | SGPP1       | sphingosine-1-phosphate phosphatase 1                                                  | Locus type: gene with protein product, function known or inferred/HUGO ID: 17720/UniProt ID: Q9BX95/MGD ID: MGI:2135760/                         |
| 5334.1       | 5334           | PLCL1       | phospholipase C-like 1                                                                 | Aliases: PLC-L, PLCL/HUGO ID: 9063/UniProt ID: Q15111/                                                                                           |
| 8706.1       | 8706           | B3GALT3     | UDP-Gal:betaGlcNAc beta 1,3-galactosyltransferase, polypeptide 3                       | Locus type: gene with protein product, function known or inferred/Aliases: beta3Gal-T3, galT3, P1/HUGO ID: 918/UniProt ID: O75752/               |
| 23443.1      | 23443          | SLC35A3     | solute carrier family 35 (UDP-N-acetylglucosamine (UDP-GlcNAc) transporter), member A3 | HUGO ID: 11023/UniProt ID: Q9Y2D2/                                                                                                               |
| 534.1        | 534            | ATP6V1G2    | ATPase, H+ transporting, lysosomal 13kDa, V1 subunit G isoform 2                       | Aliases: Vma10, NG38, Em:AC004181.3/HUGO ID: 862/UniProt ID: O95670/                                                                             |
| 19.1         | 19             | ABCA1       | ATP-binding cassette, sub-family A (ABC1), member 1                                    | Aliases: TGD, Tangier disease/HUGO ID: 29/UniProt ID: O95477/                                                                                    |
| 92483.1      | 92483          | LDHAL6B     | lactate dehydrogenase A-like 6B                                                        | Locus type: gene with protein product, function unknown/Aliases: LDHL/HUGO ID: 21481/                                                            |
| 8503.1       | 8503           | PIK3R3      | phosphoinositide-3-kinase, regulatory subunit 3 (p55, gamma)                           | HUGO ID: 8981/UniProt ID: Q92569/                                                                                                                |
| 55315.1      | 55315          | SLC29A3     | solute carrier family 29 (nucleoside transporters), member 3                           | Locus type: gene with protein product, function known or inferred/Aliases: ENT3, FLJ11160/HUGO ID: 23096/UniProt ID: Q9BZD2/                     |
| 9152.1       | 9152           | SLC6A5      | solute carrier family 6 (neurotransmitter transporter, glycine) member 5               | Aliases: GLYT2/HUGO ID: 11051/UniProt ID: Q9Y345/                                                                                                |
| 90161.1      | 90161          | HS6ST2      | heparan sulfate 6-O-sulfotransferase 2                                                 | Locus type: gene with protein product, function known or inferred/HUGO ID: 19133/UniProt ID: Q96MM7/                                             |
| 27124.1      | 27124          | PIB5PA      | phosphatidylinositol (4,5) bisphosphate 5-phosphatase, A                               | HUGO ID: 8956/UniProt ID: Q15735/                                                                                                                |
| 55301.1      | 55301          | THEDC1      | thioesterase domain containing 1                                                       | Locus type: gene with protein product, function unknown/Aliases: FLJ11106/HUGO ID: 25625/                                                        |
| 491.1        | 491            | ATP2B2      | ATPase, Ca++ transporting, plasma membrane 2                                           | Aliases: PMCA2/HUGO ID: 815/UniProt ID: Q01814/                                                                                                  |
| 91703.1      | 91703          | ACY3        | aspartoacylase (aminocyclase) 3                                                        | Locus type: gene with protein product, function known or inferred/Aliases: HCBP1, MGC9740, ACY-3/HUGO ID: 24104/MGD ID: MGI:1918920/             |
| 6506.1       | 6506           | SLC1A2      | solute carrier family 1 (glial high affinity glutamate transporter), member 2          | Aliases: GLT-1, EAAT2/HUGO ID: 10940/UniProt ID: P43004/                                                                                         |
| 284129.1     | 284129         | SLC26A11    | solute carrier family 26, member 11                                                    | HUGO ID: 14471/UniProt ID: Q86YX7/                                                                                                               |
| 10861.1      | 10861          | SLC26A1     | solute carrier family 26 (sulfate transporter), member 1                               | Locus type: gene with protein product, function known or inferred/Aliases: SAT-1, EDM4/HUGO ID: 10993/UniProt ID: Q9H2B4/                        |
| 26002.1      | 26002          | MOXD1       | monooxygenase, DBH-like 1                                                              | Locus type: gene with protein product, function unknown/Aliases: DKFPZ564G202, MOX, dJ248E1.1/HUGO ID: 21063/UniProt ID: Q9H4M6/                 |
| 5264.1       | 5264           | PHYH        | phytanoyl-CoA hydroxylase (Refsum disease)                                             | Aliases: PAHX/HUGO ID: 8940/UniProt ID: O14832/                                                                                                  |
| 2108.1       | 2108           | ETFA        | electron-transfer-flavoprotein, alpha polypeptide (glutaric aciduria II)               | Locus type: gene with protein product, function known or inferred/Aliases: GA2, EMA, MADD/HUGO ID: 3481/UniProt ID: P13804/                      |
| 6558.1       | 6558           | SLC12A2     | solute carrier family 12 (sodium/potassium/chloride transporters), member 2            | Aliases: NKCC1/HUGO ID: 10911/UniProt ID: P55011/                                                                                                |
| 53354.1      | 53354          | PANK1       | pantothenate kinase 1                                                                  | Locus type: gene with protein product, function known or inferred/Aliases: MGC24596, PANK1a, PANK1b/HUGO ID: 8598/UniProt ID: Q8TE04/            |
| 79901.1      | 79901          | CYBRD1      | cytochrome b reductase 1                                                               | Locus type: gene with protein product, function known or inferred/Aliases: DCYTB, FLJ23462/HUGO ID: 20797/UniProt ID: Q9HQ8/MGD ID: MGI:2654575/ |
| 6541.1       | 6541           | SLC7A1      | solute carrier family 7 (cationic amino acid transporter, y+ system), member 1         | Aliases: CAT-1, HCAT1, REC1L/HUGO ID: 11057/UniProt ID: P30825/                                                                                  |
| 80270.1      | 80270          | HSD3B7      | hydroxy-delta-5-steroid dehydrogenase, 3 beta- and steroid delta-isomerase 7           | Locus type: gene with protein product, function known or inferred/Aliases: C(27)-3BETA-HSD/HUGO ID: 18324/UniProt ID: Q9BSN9/                    |
| 58510.1      | 58510          | PRODH2      | proline dehydrogenase (oxidase) 2                                                      | Locus type: gene with protein product, function known or inferred/Aliases: HSPOX1/HUGO ID: 17325/UniProt ID: O00420/                             |
| 477.1        | 477            | ATPIA2      | ATPase, Na+/K+ transporting, alpha 2 (+) polypeptide                                   | HUGO ID: 800/UniProt ID: P50993/                                                                                                                 |
| 121278.1     | 121278         | TPH2        | tryptophan hydroxylase 2                                                               | Locus type: gene with protein product, function known or inferred/Aliases: NTPH, FLJ37295/HUGO ID: 20692/UniProt ID: Q8IWU9/MGD ID: MGI:2651811/ |
| 51557.1      | 51557          | GLULD1      | glutamate-ammonia ligase (glutamine synthase) domain containing 1                      | Locus type: gene with protein product, function known or inferred/Aliases: lengsin, LGS/HUGO ID: 21016/UniProt ID: Q9NYJ0/                       |
| 956.1        | 956            | ENTPD3      | ectonucleoside triphosphate diphosphohydrolase 3                                       | Locus type: gene with protein product, function known or inferred/Aliases: NTPDase-3, HB6/HUGO ID: 3365/UniProt ID: O75355/                      |
| 8781.1       | 8781           | PSPHL       | phosphoserine phosphatase-like                                                         | Aliases: CO9/HUGO ID: 9578/UniProt ID: O15172/                                                                                                   |
| 10164.1      | 10164          | CHST4       | carbohydrate (N-acetylglucosamine 6-O) sulfotransferase 4                              | Aliases: HEC-GLCNAC-6-ST, LSST/HUGO ID: 1972/UniProt ID: Q8NCG5/MGD ID: MGI:1349479/                                                             |
| 57733.1      | 57733          | GBA3        | glucosidase, beta, acid 3 (cytosolic)                                                  | Locus type: gene with protein product, function known or inferred/Aliases: GLUC/HUGO ID: 19069/UniProt ID: Q9H227/                               |
| 6549.1       | 6549           | SLC9A2      | solute carrier family 9 (sodium/hydrogen exchanger), isoform 2                         | HUGO ID: 11072/UniProt ID: Q9UBY0/                                                                                                               |
| 83852.1      | 83852          | SETDB2      | SET domain, bifurcated 2                                                               | Locus type: gene with protein product, function unknown/Aliases: CLLD8, CLLL8/HUGO ID: 20263/UniProt ID: Q96T68/                                 |
| 25769.1      | 25769          | SLC24A2     | solute carrier family 24 (sodium/potassium/calcium exchanger), member 2                | Locus type: gene with protein product, function known or inferred/Aliases: NCKX2/HUGO ID: 10976/UniProt ID: Q9UI40/                              |

| Abbreviation | Entrez Gene ID | Gene Symbol | Putative Function                                                                                                                                        | Additional notes                                                                                                                                      |
|--------------|----------------|-------------|----------------------------------------------------------------------------------------------------------------------------------------------------------|-------------------------------------------------------------------------------------------------------------------------------------------------------|
| 6647.1       | 6647           | SOD1        | superoxide dismutase 1, soluble (amyotrophic lateral sclerosis 1 (adult))                                                                                | HUGO ID: 11179/UniProt ID: P00441/                                                                                                                    |
| 9114.1       | 9114           | ATP6V0D1    | ATPase, H+ transporting, lysosomal 38kDa, V0 subunit d isoform 1                                                                                         | Aliases: ATP6DV, VATX, VPATPD, P39, Vma6/HUGO ID: 13724/UniProt ID: P12953/                                                                           |
| 50940.1      | 50940          | PDE11A      | phosphodiesterase 11A                                                                                                                                    | HUGO ID: 8773/UniProt ID: Q9HCR9/                                                                                                                     |
| 166012.1     | 166012         | CHST13      | carbohydrate (chondroitin 4) sulfotransferase 13                                                                                                         | Locus type: gene with protein product, function known or inferred/Aliases: C4ST3/HUGO ID: 21755/UniProt ID: Q8NET6/                                   |
| 9227.1       | 9227           | LRAT        | lecithin retinol acyltransferase (phosphatidylcholine--retinol O-acyltransferase)                                                                        | HUGO ID: 6685/UniProt ID: O95237/                                                                                                                     |
| 132789.1     | 132789         | GNPDA2      | glucosamine-6-phosphate deaminase 2                                                                                                                      | Locus type: gene with protein product, function known or inferred/Aliases: 4921523118Rik, SB52/HUGO ID: 21526/UniProt ID: Q8TDQ7/MGD ID: MGI:1915230/ |
| 94005.1      | 94005          | PIGS        | phosphatidylinositol glycan, class S                                                                                                                     | HUGO ID: 14937/UniProt ID: Q96S52/                                                                                                                    |
| 11212.1      | 11212          | PROSC       | proline synthetase co-transcribed homolog (bacterial)                                                                                                    | Locus type: gene with protein product, function known or inferred/HUGO ID: 9457/UniProt ID: O94903/                                                   |
| 1836.1       | 1836           | SLC26A2     | solute carrier family 26 (sulfate transporter), member 2                                                                                                 | Locus type: gene with protein product, function known or inferred/HUGO ID: 10994/UniProt ID: P50443/                                                  |
| 495.1        | 495            | ATP4A       | ATPase, H+/K+ exchanging, alpha polypeptide                                                                                                              | Aliases: ATP6A/HUGO ID: 819/UniProt ID: P20648/                                                                                                       |
| 5052.1       | 5052           | PRDX1       | peroxiredoxin 1                                                                                                                                          | Locus type: gene with protein product, function known or inferred/Aliases: NKEFA/HUGO ID: 9352/UniProt ID: Q06830/                                    |
| 9153.1       | 9153           | SLC28A2     | solute carrier family 28 (sodium-coupled nucleoside transporter), member 2                                                                               | Locus type: gene with protein product, function known or inferred/Aliases: CNT2, SPNT1, HCNT2, HsT17153/HUGO ID: 11002/UniProt ID: O43868/            |
| 84720.1      | 84720          | PIGO        | phosphatidylinositol glycan, class O                                                                                                                     | Locus type: gene with protein product, function known or inferred/Aliases: DKFZp434M222, FLJ00135/HUGO ID: 23215/UniProt ID: Q8TEQ8/                  |
| 6523.1       | 6523           | SLC5A1      | solute carrier family 5 (sodium/glucose cotransporter), member 1                                                                                         | Aliases: D22S675/HUGO ID: 11036/UniProt ID: P13866/                                                                                                   |
| 10723.1      | 10723          | SLC12A7     | solute carrier family 12 (potassium/chloride transporters), member 7                                                                                     | Locus type: gene with protein product, function known or inferred/Aliases: KCC4, DKFZP434F076/HUGO ID: 10915/UniProt ID: Q9Y666/                      |
| 66035.1      | 66035          | SLC2A11     | solute carrier family 2 (facilitated glucose transporter), member 11                                                                                     | Aliases: GLUT11, GLUT10/HUGO ID: 14239/UniProt ID: Q9BYW1/                                                                                            |
| 56606.1      | 56606          | SLC2A9      | solute carrier family 2 (facilitated glucose transporter), member 9                                                                                      | Aliases: Glut9, GLUTX/HUGO ID: 13446/UniProt ID: Q9NRM0/                                                                                              |
| 11343.1      | 11343          | MGLL        | monoglyceride lipase                                                                                                                                     | Locus type: gene with protein product, function known or inferred/Aliases: HK5, MGL/HUGO ID: 17038/UniProt ID: Q99685/                                |
| 6820.1       | 6820           | SULT2B1     | sulfotransferase family, cytosolic, 2B, member 1                                                                                                         | Aliases: HSST2/HUGO ID: 11459/UniProt ID: O00205/                                                                                                     |
| 51380.1      | 51380          | CSAD        | cysteine sulfonic acid decarboxylase                                                                                                                     | Aliases: PCAP, CSD/HUGO ID: 18966/UniProt ID: Q9Y600/MGD ID: MGI:2180098/                                                                             |
| 6554.1       | 6554           | SLC10A1     | solute carrier family 10 (sodium/bile acid cotransporter family), member 1                                                                               | Aliases: NTCP/HUGO ID: 10905/UniProt ID: Q14973/                                                                                                      |
| 6532.1       | 6532           | SLC6A4      | solute carrier family 6 (neurotransmitter transporter, serotonin), member 4                                                                              | HUGO ID: 11050/UniProt ID: P31645/                                                                                                                    |
| 6514.1       | 6514           | SLC2A2      | solute carrier family 2 (facilitated glucose transporter), member 2                                                                                      | HUGO ID: 11006/UniProt ID: P11168/                                                                                                                    |
| 8622.1       | 8622           | PDE8B       | phosphodiesterase 8B                                                                                                                                     | Locus type: gene with protein product, function known or inferred/HUGO ID: 8794/UniProt ID: O95263/                                                   |
| 5296.1       | 5296           | PIK3R2      | phosphoinositide-3-kinase, regulatory subunit 2 (p85 beta)                                                                                               | Aliases: P85B/HUGO ID: 8980/UniProt ID: O00459/                                                                                                       |
| 6505.1       | 6505           | SLC1A1      | solute carrier family 1 (neuronal/epithelial high affinity glutamate transporter, system Xag), member 1                                                  | Aliases: EAAC1, EAAT3/HUGO ID: 10939/UniProt ID: P43005/                                                                                              |
| 6571.1       | 6571           | SLC18A2     | solute carrier family 18 (vesicular monoamine), member 2                                                                                                 | Locus type: gene with protein product, function known or inferred/Aliases: SVMT, SVAT/HUGO ID: 10935/UniProt ID: Q05940/                              |
| 23743.1      | 23743          | BHMT2       | betaine-homocysteine methyltransferase 2                                                                                                                 | HUGO ID: 1048/UniProt ID: Q9H2M3/                                                                                                                     |
| 11000.1      | 11000          | SLC27A3     | solute carrier family 27 (fatty acid transporter), member 3                                                                                              | Locus type: gene with protein product, function known or inferred/Aliases: FATP3, MGC4365/HUGO ID: 10997/UniProt ID: Q9BTY5/MGD ID: MGI:1347358/      |
| 366.1        | 366            | AQP9        | aquaporin 9                                                                                                                                              | Locus type: gene with protein product, function known or inferred/Aliases: SSC1, HsT17287/HUGO ID: 643/UniProt ID: O43315/                            |
| 3635.1       | 3635           | INPP5D      | inositol polyphosphate-5-phosphatase, 145kDa                                                                                                             | Aliases: SHIP, hp51CN/HUGO ID: 6079/UniProt ID: O00145/                                                                                               |
| 2581.1       | 2581           | GALC        | galactosylceramidase (Krabbe disease)                                                                                                                    | HUGO ID: 4115/UniProt ID: P54803/                                                                                                                     |
| 30815.1      | 30815          | SIAT7F      | sialyltransferase 7 ((alpha-N-acetylneuraminy) 2,3-betagalactosyl-1,3)-N-acetyl galactosaminide alpha-2,6-sialyltransferase) F                           | Locus type: gene with protein product, function known or inferred/Aliases: ST6GALNAC6, ST6GALNACV1/HUGO ID: 23364/MGD ID: MGI:1355316/                |
| 10610.1      | 10610          | SIAT7B      | sialyltransferase 7 ((alpha-N-acetylneuraminy) 2,3-betagalactosyl-1,3)-N-acetyl galactosaminide alpha-2,6-sialyltransferase) B                           | Locus type: gene with protein product, function known or inferred/Aliases: ST6GalNA II, III, IV, STHM/HUGO ID: 10867/UniProt ID: Q9UJ37/              |
| 6519.1       | 6519           | SLC3A1      | solute carrier family 3 (cystine, dibasic and neutral amino acid transporters, activator of cystine, dibasic and neutral amino acid transport), member 1 | Aliases: CSNU1, D2H, RBAT/HUGO ID: 11025/UniProt ID: Q07837/                                                                                          |
| 2992.1       | 2992           | GYG         | glycogenin                                                                                                                                               | Locus type: gene with protein product, function known or inferred/HUGO ID: 4699/UniProt ID: P46976/                                                   |
| 9057.1       | 9057           | SLC7A6      | solute carrier family 7 (cationic amino acid transporter, y+ system), member 6                                                                           | Locus type: gene with protein product, function known or inferred/Aliases: y-LAT-2, KIAA0245, LAT3, LAT-2/HUGO ID: 11064/UniProt ID: Q92536/          |
| 7923.1       | 7923           | HSD17B8     | hydroxysteroid (17-beta) dehydrogenase 8                                                                                                                 | Aliases: HKE6, RING2, HKE6, D6S2245E, RING2, KE6, H2-KE6/HUGO ID: 3554/UniProt ID: Q92506/                                                            |

| Abbreviation | Entrez Gene ID | Gene Symbol | Putative Function                                                                       | Additional notes                                                                                                                                      |
|--------------|----------------|-------------|-----------------------------------------------------------------------------------------|-------------------------------------------------------------------------------------------------------------------------------------------------------|
| 137872.1     | 137872         | ADHFE1      | alcohol dehydrogenase, iron containing, 1                                               | Locus type: gene with protein product, function known or inferred/Aliases: ADHFE1, FLJ32430/HUGO ID: 16354/UniProt ID: Q81WWS/MGD ID: MGI:1923437/    |
| 57084.1      | 57084          | SLC17A6     | solute carrier family 17 (sodium-dependent inorganic phosphate cotransporter), member 6 | Aliases: DNPI/HUGO ID: 16703/UniProt ID: Q9P2U8/                                                                                                      |
| 6579.1       | 6579           | SLCO1A2     | solute carrier organic anion transporter family, member 1A2                             | Locus type: gene with protein product, function known or inferred/Aliases: OATP, OATP1A2, OATP-A/HUGO ID: 10956/UniProt ID: P46721/                   |
| 6535.1       | 6535           | SLC6A8      | solute carrier family 6 (neurotransmitter transporter, creatine member 8)               | Aliases: CRTR, CT1/HUGO ID: 11055/UniProt ID: P48029/                                                                                                 |
| 9435.1       | 9435           | CHST2       | carbohydrate (N-acetylglucosamine-6-O) sulfotransferase 2                               | Locus type: gene with protein product, function known or inferred/Aliases: C6ST/HUGO ID: 1970/UniProt ID: Q9Y4C5/                                     |
| 6448.1       | 6448           | SGSH        | N-sulfoglucosamine sulfohydrolase (sulfamidase)                                         | Locus type: gene with protein product, function known or inferred/Aliases: HSS, MPS3A, SFMD/HUGO ID: 10818/UniProt ID: P51688/                        |
| 7001.1       | 7001           | PRDX2       | peroxiredoxin 2                                                                         | Aliases: PRP, NKEFB/HUGO ID: 9353/UniProt ID: P32119/                                                                                                 |
| 90423.1      | 90423          | ATP6V1E2    | ATPase, H+ transporting, lysosomal 31kDa, V1 subunit E isoform 2                        | Locus type: gene with protein product, function known or inferred/Aliases: MGC9341, VMA4, ATP6E1/HUGO ID: 18125/UniProt ID: Q96A05/                   |
| 349565.1     | 349565         | NMNAT3      | nicotinamide nucleotide adenyltransferase 3                                             | Locus type: gene with protein product, function known or inferred/Aliases: PNAT3/HUGO ID: 20989/UniProt ID: Q96T66/                                   |
| 11182.1      | 11182          | SLC2A6      | solute carrier family 2 (facilitated glucose transporter), member 6                     | Aliases: GLUT9, GLUT6/HUGO ID: 11011/UniProt ID: Q9UGQ3/                                                                                              |
| 84706.1      | 84706          | GPT2        | glutamic pyruvate transaminase (alanine aminotransferase) 2                             | Aliases: ALT2/HUGO ID: 18062/UniProt ID: Q8TD30/                                                                                                      |
| 197257.1     | 197257         | LDHD        | lactate dehydrogenase D                                                                 | Locus type: gene with protein product, function known or inferred/HUGO ID: 19708/UniProt ID: Q8ZK5/                                                   |
| 6575.1       | 6575           | SLC20A2     | solute carrier family 20 (phosphate transporter), member 2                              | Aliases: PIT-2, Glvr-2/HUGO ID: 10947/UniProt ID: Q08357/                                                                                             |
| 56623.1      | 56623          | INPP5E      | inositol polyphosphate-5-phosphatase, 72 kDa                                            | Locus type: gene with protein product, function known or inferred/Aliases: PPI5PIV/HUGO ID: 21474/UniProt ID: Q9NRR6/MGD ID: MGI:1927753/             |
| 128869.1     | 128869         | CDC91L1     | CDC91 cell division cycle 91-like 1 (S. cerevisiae)                                     | Aliases: bA346K17.2/HUGO ID: 15791/UniProt ID: Q9H490/                                                                                                |
| 7295.1       | 7295           | TXN         | thioredoxin                                                                             | Aliases: TRX/HUGO ID: 12435/UniProt ID: P10599/                                                                                                       |
| 10948.1      | 10948          | STARD3      | START domain containing 3                                                               | Aliases: es64, MLN64/HUGO ID: 17579/UniProt ID: Q14849/MGD ID: MGI:1929618/                                                                           |
| 1638.1       | 1638           | DCT         | dopachrome tautomerase (dopachrome delta-isomerase, tyrosine-related protein 2)         | HUGO ID: 2709/UniProt ID: P40126/                                                                                                                     |
| 5244.1       | 5244           | ABCB4       | ATP-binding cassette, sub-family B (MDR/TAP), member 4                                  | Locus type: gene with protein product, function known or inferred/Aliases: MDR2/3, PFIC-3/HUGO ID: 45/UniProt ID: P21439/                             |
| 60482.1      | 60482          | SLC5A7      | solute carrier family 5 (choline transporter), member 7                                 | Aliases: hCHT, CHT1/HUGO ID: 14025/UniProt ID: Q9GZV3/                                                                                                |
| 144195.1     | 144195         | SLC2A14     | solute carrier family 2 (facilitated glucose transporter), member 14                    | Locus type: gene with protein product, function known or inferred/Aliases: GLUT14/HUGO ID: 18301/UniProt ID: Q8TDB8/                                  |
| 1718.1       | 1718           | DHCR24      | 24-dehydrocholesterol reductase                                                         | Aliases: KIAA0018, seladin-1/HUGO ID: 2859/UniProt ID: Q15392/                                                                                        |
| 53905.1      | 53905          | DUOX1       | dual oxidase 1                                                                          | Aliases: NOXEF1, THOX1/HUGO ID: 3062/UniProt ID: Q9NRD9/                                                                                              |
| 10246.1      | 10246          | SLC17A2     | solute carrier family 17 (sodium phosphate), member 2                                   | Aliases: NPT3/HUGO ID: 10930/UniProt ID: O00624/                                                                                                      |
| 6580.1       | 6580           | SLC22A1     | solute carrier family 22 (organic cation transporter), member 1                         | Aliases: 38261/HUGO ID: 10963/UniProt ID: O15245/                                                                                                     |
| 124583.1     | 124583         | CANT1       | calcium activated nucleotidase 1                                                        | Locus type: gene with protein product, function known or inferred/Aliases: SHAPY, SCAN-1/HUGO ID: 19721/MGD ID: MGI:1923275/                          |
| 284208.1     | 284208         | B3GNTL1     | UDP-GlcNAc:betaGal beta-1,3-N-acetylglucosaminyltransferase-like 1                      | Locus type: gene with protein product, function known or inferred/HUGO ID: 21727/ transcript: NM_001009905                                            |
| 162466.1     | 162466         | PHOSPHO1    | phosphatase, orphan 1                                                                   | HUGO ID: 16815/UniProt ID: Q8TCT1/                                                                                                                    |
| 266722.1     | 266722         | HS6ST3      | heparan sulfate 6-O-sulfotransferase 3                                                  | HUGO ID: 19134/UniProt ID: Q8IZP7/                                                                                                                    |
| 2351.1       | 2351           | FOLR2L      | folate receptor 2 (fetal) like                                                          | HUGO ID: 3794/                                                                                                                                        |
| 92745.1      | 92745          | SLC38A5     | solute carrier family 38, member 5                                                      | Locus type: gene with protein product, function known or inferred/Aliases: SN2, JM24/HUGO ID: 18070/UniProt ID: Q9UJU8/                               |
| 91373.1      | 91373          | UAP1L1      | UDP-N-acetylglucosamine pyrophosphorylase 1-like 1                                      | Locus type: gene with protein product, function unknown/HUGO ID: 28082/                                                                               |
| 10201.1      | 10201          | NME6        | non-metastatic cells 6, protein expressed in (nucleoside-diphosphate kinase)            | Locus type: gene with protein product, function known or inferred/Aliases: NM23-H6, IPIA-ALPHA/HUGO ID: 20567/UniProt ID: O75414/MGD ID: MGI:1861676/ |
| 9187.1       | 9187           | SLC24A1     | solute carrier family 24 (sodium/potassium/calcium exchanger), member 1                 | Locus type: gene with protein product, function known or inferred/Aliases: NCKX1, NCKX, RODX, KIAA0702, HsT17412/HUGO ID: 10975/UniProt ID: Q60721/   |
| 492.1        | 492            | ATP2B3      | ATPase, Ca++ transporting, plasma membrane 3                                            | Aliases: PMCA3/HUGO ID: 816/UniProt ID: Q16720/                                                                                                       |
| 8611.1       | 8611           | PPAP2A      | phosphatidic acid phosphatase type 2A                                                   | Aliases: PAP-2a/HUGO ID: 9228/UniProt ID: O60463/                                                                                                     |
| 8310.1       | 8310           | ACOX3       | acyl-Coenzyme A oxidase 3, pristanoyl                                                   | HUGO ID: 121/UniProt ID: O15254/                                                                                                                      |
| 55224.1      | 55224          | ETNK2       | ethanolamine kinase 2                                                                   | Locus type: gene with protein product, function unknown/Aliases: FLJ10761, EK12/HUGO ID: 25575/MGD ID: MGI:2443760/                                   |
| 28231.1      | 28231          | SLCO4A1     | solute carrier organic anion transporter family, member 4A1                             | Locus type: gene with protein product, function known or inferred/Aliases: OATP-E, OATP4A1/HUGO ID: 10953/UniProt ID: Q96BD0/                         |

| Abbreviation | Entrez Gene ID | Gene Symbol | Putative Function                                                                                        | Additional notes                                                                                                                               |
|--------------|----------------|-------------|----------------------------------------------------------------------------------------------------------|------------------------------------------------------------------------------------------------------------------------------------------------|
| 10402.1      | 10402          | SIAT10      | sialyltransferase 10 (alpha-2,3-sialyltransferase VI)                                                    | Locus type: gene with protein product, function known or inferred/Aliases: ST3GALVI/HUGO ID: 18080/UniProt ID: Q9Y274/                         |
| 2109.1       | 2109           | ETFB        | electron-transfer-flavoprotein, beta polypeptide                                                         | Locus type: gene with protein product, function known or inferred/HUGO ID: 3482/UniProt ID: P38117/                                            |
| 64078.1      | 64078          | SLC28A3     | solute carrier family 28 (sodium-coupled nucleoside transporter), member 3                               | Aliases: CNT3/HUGO ID: 16484/UniProt ID: Q9HAS3/                                                                                               |
| 80704.1      | 80704          | SLC19A3     | solute carrier family 19, member 3                                                                       | HUGO ID: 16266/UniProt ID: Q9BZV2/                                                                                                             |
| 10999.1      | 10999          | SLC27A4     | solute carrier family 27 (fatty acid transporter), member 4                                              | Locus type: gene with protein product, function known or inferred/Aliases: FATP4/HUGO ID: 10998/UniProt ID: Q95186/MGD ID: MGI:1347347/        |
| 80150.1      | 80150          | ASRGL1      | asparaginase like 1                                                                                      | Aliases: FLJ22316, ALP1/HUGO ID: 16448/UniProt ID: Q8NI34/                                                                                     |
| 6518.1       | 6518           | SLC2A5      | solute carrier family 2 (facilitated glucose/fructose transporter), member 5                             | Locus type: gene with protein product, function known or inferred/HUGO ID: 11010/UniProt ID: P22732/MGD ID: MGI:1928369/                       |
| 478.1        | 478            | ATPIA3      | ATPase, Na+/K+ transporting, alpha 3 polypeptide                                                         | HUGO ID: 801/UniProt ID: P13637/                                                                                                               |
| 9194.1       | 9194           | SLC16A7     | solute carrier family 16 (monocarboxylic acid transporters), member 7                                    | Locus type: gene with protein product, function known or inferred/Aliases: MCT2/HUGO ID: 10928/UniProt ID: O60669/                             |
| 6509.1       | 6509           | SLC1A4      | solute carrier family 1 (glutamate/neutral amino acid transporter), member 4                             | Aliases: SATT, ASCT1/HUGO ID: 10942/UniProt ID: P43007/                                                                                        |
| 1808.1       | 1808           | DPYSL2      | dihydropyrimidinase-like 2                                                                               | Locus type: gene with protein product, function known or inferred/Aliases: DRP-2, DHPRP2, CRMP2, DRP2/HUGO ID: 3014/UniProt ID: Q16555/        |
| 57379.1      | 57379          | AICDA       | activation-induced cytidine deaminase                                                                    | Aliases: CDA2, AID/HUGO ID: 13203/UniProt ID: Q9GZX7/                                                                                          |
| 9952.1       | 9952           | HS3ST3B2    | heparan sulfate (glucosamine) 3-O-sulfotransferase 3B2                                                   | Aliases: 3OST3B2/HUGO ID: 5199/                                                                                                                |
| 159963.1     | 159963         | SLC5A12     | solute carrier family 5 (sodium/glucose cotransporter), member 12                                        | Locus type: gene with protein product, function unknown/Aliases: MGC52019/HUGO ID: 28750/MGD ID: MGI:2138890/                                  |
| 56994.1      | 56994          | CHPT1       | choline phosphotransferase 1                                                                             | Aliases: CPT1/HUGO ID: 17852/UniProt ID: Q8WUD6/                                                                                               |
| 84002.1      | 84002          | B3GNT5      | UDP-GlcNAc:betaGal beta-1,3-N-acetylglucosaminyltransferase 5                                            | Aliases: B3GN-T5, beta3Gn-T5/HUGO ID: 15684/UniProt ID: Q9BYG0/                                                                                |
| 6540.1       | 6540           | SLC6A13     | solute carrier family 6 (neurotransmitter transporter, GABA), member 13                                  | Locus type: gene with protein product, function known or inferred/Aliases: GAT2/HUGO ID: 11046/UniProt ID: Q9NSD5/                             |
| 6574.1       | 6574           | SLC20A1     | solute carrier family 20 (phosphate transporter), member 1                                               | Aliases: PiT-1, Glvr-1/HUGO ID: 10946/UniProt ID: Q08344/                                                                                      |
| 7263.1       | 7263           | TST         | thiosulfate sulfurtransferase (rhodanese)                                                                | Aliases: RDS/HUGO ID: 12388/UniProt ID: Q16762/                                                                                                |
| 1607.1       | 1607           | DGKB        | diacylglycerol kinase, beta 90kDa                                                                        | Locus type: gene with protein product, function known or inferred/Aliases: KIAA0718, DGK, DGK-BETA/HUGO ID: 2850/UniProt ID: Q9Y6T7/           |
| 10087.1      | 10087          | COL4A3BP    | collagen, type IV, alpha 3 (Goodpasture antigen) binding protein                                         | Aliases: GPBP, STARD11/HUGO ID: 2205/UniProt ID: Q9Y5P4/                                                                                       |
| 9807.1       | 9807           | IHPK1       | inositol hexaphosphate kinase 1                                                                          | Locus type: gene with protein product, function known or inferred/Aliases: KIAA0263, IP6K1/HUGO ID: 18360/UniProt ID: Q92551/                  |
| 54490.1      | 54490          | UGT2B28     | UDP glycosyltransferase 2 family, polypeptide B28                                                        | Locus type: gene with protein product, function known or inferred/HUGO ID: 13479/UniProt ID: Q9BY64/                                           |
| 2712.1       | 2712           | GK2         | glycerol kinase 2                                                                                        | Aliases: GKTA/HUGO ID: 4291/UniProt ID: Q14410/                                                                                                |
| 6522.1       | 6522           | SLC4A2      | solute carrier family 4, anion exchanger, member 2 (erythrocyte membrane protein band 3-like 1)          | Aliases: HKB3/HUGO ID: 11028/UniProt ID: P04920/                                                                                               |
| 955.1        | 955            | ENTPD6      | ectonucleoside triphosphate diphosphohydrolase 6 (putative function)                                     | Locus type: gene with protein product, function known or inferred/Aliases: NTPDase-6, HGNC:16241, dJ738P15.3/HUGO ID: 3368/UniProt ID: Q75354/ |
| 7306.1       | 7306           | TYRP1       | tyrosinase-related protein 1                                                                             | HUGO ID: 12450/UniProt ID: P17643/                                                                                                             |
| 6548.1       | 6548           | SLC9A1      | solute carrier family 9 (sodium/hydrogen exchanger), isoform 1 (antiporter, Na+/H+, amiloride sensitive) | Locus type: gene with protein product, function known or inferred/HUGO ID: 11071/UniProt ID: P19634/MGD ID: MGI:102462/                        |
| 6557.1       | 6557           | SLC12A1     | solute carrier family 12 (sodium/potassium/chloride transporters), member 1                              | Aliases: NKCC2/HUGO ID: 10910/UniProt ID: Q13621/                                                                                              |
| 6561.1       | 6561           | SLC13A1     | solute carrier family 13 (sodium/sulfate symporters), member 1                                           | Aliases: NaSi-1/HUGO ID: 10916/UniProt ID: Q9BZW2/                                                                                             |
| 6513.1       | 6513           | SLC2A1      | solute carrier family 2 (facilitated glucose transporter), member 1                                      | HUGO ID: 11005/UniProt ID: P11166/                                                                                                             |
| 51227.1      | 51227          | DSCR5       | Down syndrome critical region gene 5                                                                     | Aliases: DCRC, DSRC/HUGO ID: 3046/UniProt ID: P57054/                                                                                          |
| 6531.1       | 6531           | SLC6A3      | solute carrier family 6 (neurotransmitter transporter, dopamine), member 3                               | HUGO ID: 11049/UniProt ID: Q01959/                                                                                                             |
| 51604.1      | 51604          | PIGT        | phosphatidylinositol glycan, class T                                                                     | Locus type: gene with protein product, function known or inferred/HUGO ID: 14938/UniProt ID: Q969N2/                                           |
| 117283.1     | 117283         | IHPK3       | inositol hexaphosphate kinase 3                                                                          | Locus type: gene with protein product, function known or inferred/Aliases: INSP6K3, IP6K3/HUGO ID: 17269/UniProt ID: Q96PC2/                   |
| 151531.1     | 151531         | UPP2        | uridine phosphorylase 2                                                                                  | Locus type: gene with protein product, function known or inferred/Aliases: UPASE2, UP2, UDRPASE2/HUGO ID: 23061/UniProt ID: Q95045/            |
| 10786.1      | 10786          | SLC17A3     | solute carrier family 17 (sodium phosphate), member 3                                                    | Aliases: NPT4/HUGO ID: 10931/UniProt ID: Q00476/                                                                                               |
| 6583.1       | 6583           | SLC22A4     | solute carrier family 22 (organic cation transporter), member 4                                          | Locus type: gene with protein product, function known or inferred/Aliases: OCTN1, MGC34546/HUGO ID: 10968/UniProt ID: O14546/                  |
| 51447.1      | 51447          | IHPK2       | inositol hexaphosphate kinase 2                                                                          | Aliases: IP6K2/HUGO ID: 17313/UniProt ID: Q9H4P7/                                                                                              |
| 6526.1       | 6526           | SLC5A3      | solute carrier family 5 (inositol transporters), member 3                                                | Aliases: SMIT/HUGO ID: 11038/UniProt ID: P53794/                                                                                               |

| Abbreviation | Entrez Gene ID | Gene Symbol | Putative Function                                                                                                                          | Additional notes                                                                                                                                                  |
|--------------|----------------|-------------|--------------------------------------------------------------------------------------------------------------------------------------------|-------------------------------------------------------------------------------------------------------------------------------------------------------------------|
| 55349.1      | 55349          | CHDH        | choline dehydrogenase                                                                                                                      | Locus type: gene with protein product, function known or inferred/HUGO ID: 24288/MGD ID: MGI:1860776/                                                             |
| 11136.1      | 11136          | SLC7A9      | solute carrier family 7 (cationic amino acid transporter, y+ system), member 9                                                             | HUGO ID: 11067/UniProt ID: P82251/                                                                                                                                |
| 3992.1       | 3992           | FADS1       | fatty acid desaturase 1                                                                                                                    | Locus type: gene with protein product, function known or inferred/Aliases: D5D, FADSD5, TU12, FADS6/HUGO ID: 3574/UniProt ID: Q8NCC7/                             |
| 7355.1       | 7355           | SLC35A2     | solute carrier family 35 (UDP-galactose transporter), member A2                                                                            | Locus type: gene with protein product, function known or inferred/Aliases: UGAT, UGT, UGT1, UGT2, UGTL/HUGO ID: 11022/UniProt ID: P78381/                         |
| 4524.1       | 4524           | MTHFR       | 5,10-methylenetetrahydrofolate reductase (NADPH)                                                                                           | Locus type: gene with protein product, function known or inferred/HUGO ID: 7436/UniProt ID: P42898/                                                               |
| 341947.1     | 341947         | COX8C       | cytochrome c oxidase subunit 8C                                                                                                            | Locus type: gene with protein product, function known or inferred/Aliases: COX8-3/HUGO ID: 24382/MGD ID: MGI:1922733/                                             |
| 55586.1      | 55586          | ALDR1L6     | aldehyde reductase (aldose reductase) like 6                                                                                               | HUGO ID: 14522/UniProt ID: Q9UGB7/                                                                                                                                |
| 8871.1       | 8871           | SYNJ2       | synaptojanin 2                                                                                                                             | Aliases: INPP5H/HUGO ID: 11504/UniProt ID: O15056/                                                                                                                |
| 1109.1       | 1109           | AKR1C4      | aldo-keto reductase family 1, member C4 (chlordecone reductase; 3-alpha hydroxysteroid dehydrogenase, type 1; dihydrodiol dehydrogenase 4) | Locus type: gene with protein product, function known or inferred/Aliases: DD4, HAKRA, C11, 3-alpha-HSD, CDR, MGC22581/HUGO ID: 387/UniProt ID: P17516/           |
| 3658.1       | 3658           | IREB2       | iron-responsive element binding protein 2                                                                                                  | Locus type: gene with protein product, function known or inferred/Aliases: IRP2/HUGO ID: 6115/UniProt ID: P48200/                                                 |
| 6565.1       | 6565           | SLC15A2     | solute carrier family 15 (H+/-peptide transporter), member 2                                                                               | Locus type: gene with protein product, function known or inferred/Aliases: PEPT2/HUGO ID: 10921/UniProt ID: Q16348/                                               |
| 9498.1       | 9498           | SLC4A8      | solute carrier family 4, sodium bicarbonate cotransporter, member 8                                                                        | Locus type: gene with protein product, function known or inferred/Aliases: NBC3/HUGO ID: 11034/UniProt ID: O94843/                                                |
| 549.1        | 549            | AUH         | AU RNA binding protein/enoyl-Coenzyme A hydratase                                                                                          | HUGO ID: 890/UniProt ID: Q13825/                                                                                                                                  |
| 6512.1       | 6512           | SLC1A7      | solute carrier family 1 (glutamate transporter), member 7                                                                                  | Aliases: EAAT5/HUGO ID: 10945/UniProt ID: O00341/MGD ID: MGI:2444087/                                                                                             |
| 377677.1     | 377677         | CA13        | carbonic anhydrase XIII                                                                                                                    | Locus type: gene with protein product, function known or inferred/Aliases: CAXIII, FLJ37995, MGC59868/HUGO ID: 14914/                                             |
| 9468.1       | 9468           | PCYT1B      | phosphate cytidylyltransferase 1, choline, beta isoform                                                                                    | Locus type: gene with protein product, function known or inferred/Aliases: CCT-beta, CTB/HUGO ID: 8755/UniProt ID: Q9Y5K3/                                        |
| 8170.1       | 8170           | SLC14A2     | solute carrier family 14 (urea transporter), member 2                                                                                      | Aliases: HUT2, UT2/HUGO ID: 10919/UniProt ID: Q15849/                                                                                                             |
| 54576.1      | 54576          | UGT1A8      | UDP glycosyltransferase 1 family, polypeptide A8                                                                                           | Aliases: UGT1H/HUGO ID: 12540/UniProt ID: Q9HAW9/                                                                                                                 |
| 6538.1       | 6538           | SLC6A11     | solute carrier family 6 (neurotransmitter transporter, GABA), member 11                                                                    | Locus type: gene with protein product, function known or inferred/Aliases: GAT3/HUGO ID: 11044/UniProt ID: P48066/                                                |
| 376497.1     | 376497         | SLC27A1     | solute carrier family 27 (fatty acid transporter), member 1                                                                                | Locus type: gene with protein product, function known or inferred/Aliases: FATP1, FATP, MGC71751, FLJ00336/HUGO ID: 10995/UniProt ID: Q96DY3/MGD ID: MGI:1347098/ |
| 6539.1       | 6539           | SLC6A12     | solute carrier family 6 (neurotransmitter transporter, betaine/GABA), member 12                                                            | Locus type: gene with protein product, function known or inferred/Aliases: BGT-1/HUGO ID: 11045/UniProt ID: P48065/                                               |
| 245973.1     | 245973         | ATP6V1C2    | ATPase, H+ transporting, lysosomal 42kDa, V1 subunit C isoform 2                                                                           | Locus type: gene with protein product, function known or inferred/Aliases: VMA5, ATP6C2/HUGO ID: 18264/UniProt ID: Q8NEY4/                                        |
| 6543.1       | 6543           | SLC8A2      | solute carrier family 8 (sodium-calcium exchanger), member 2                                                                               | Aliases: NCX2, KIAA1087/HUGO ID: 11069/UniProt ID: Q9UPR5/                                                                                                        |
| 50487.1      | 50487          | PLA2G3      | phospholipase A2, group III                                                                                                                | Aliases: GIII-SPLA2/HUGO ID: 17934/UniProt ID: Q9NZ20/                                                                                                            |
| 57468.1      | 57468          | SLC12A5     | solute carrier family 12, (potassium-chloride transporter) member 5                                                                        | Aliases: KIAA1176/HUGO ID: 13818/UniProt ID: Q9H2X9/                                                                                                              |
| 112724.1     | 112724         | RDH13       | retinol dehydrogenase 13 (all-trans and 9-cis)                                                                                             | Locus type: gene with protein product, function known or inferred/HUGO ID: 19978/UniProt ID: Q8NBN7/                                                              |
| 2098.1       | 2098           | ESD         | esterase D/formylglutathione hydrolase                                                                                                     | HUGO ID: 3465/UniProt ID: P10768/                                                                                                                                 |
| 64711.1      | 64711          | HS3ST6      | heparan sulfate (glucosamine) 3-O-sulfotransferase 6                                                                                       | HUGO ID: 14178/UniProt ID: Q96Q15/transcript: NM_001009606                                                                                                        |
| 84532.1      | 84532          | ACAS2L      | acetyl-Coenzyme A synthetase 2 (AMP forming)-like                                                                                          | Aliases: dJ568C11.3/HUGO ID: 16091/UniProt ID: Q9NUB1/                                                                                                            |
| 115286.1     | 115286         | SLC25A26    | solute carrier family 25, member 26                                                                                                        | Locus type: gene with protein product, function known or inferred/HUGO ID: 20661/UniProt ID: Q96E68/                                                              |
| 126792.1     | 126792         | B3GALT6     | UDP-Gal:betaGal beta 1,3-galactosyltransferase polypeptide 6                                                                               | Aliases: beta3GalT6/HUGO ID: 17978/UniProt ID: Q96L58/                                                                                                            |
| 81579.1      | 81579          | PLA2G12A    | phospholipase A2, group XIIA                                                                                                               | HUGO ID: 18554/UniProt ID: Q9BZM1/                                                                                                                                |
| 79178.1      | 79178          | THTPA       | thiamine triphosphatase                                                                                                                    | Aliases: THTPASE/HUGO ID: 18987/UniProt ID: Q9BU02/                                                                                                               |
| 83697.1      | 83697          | SLC4A9      | solute carrier family 4, sodium bicarbonate cotransporter, member 9                                                                        | Locus type: gene with protein product, function known or inferred/Aliases: AE4/HUGO ID: 11035/UniProt ID: Q96Q91/                                                 |
| 28232.1      | 28232          | SLCO3A1     | solute carrier organic anion transporter family, member 3A1                                                                                | Locus type: gene with protein product, function known or inferred/Aliases: OATP-D, OATP3A1/HUGO ID: 10952/UniProt ID: Q9UIG8/                                     |
| 196883.1     | 196883         | ADCY4       | adenylate cyclase 4                                                                                                                        | HUGO ID: 235/UniProt ID: Q8NFM4/                                                                                                                                  |
| 93010.1      | 93010          | B3GNT7      | UDP-GlcNAc:betaGal beta-1,3-N-acetylglucosaminyltransferase 7                                                                              | HUGO ID: 18811/UniProt ID: Q8NFL0/                                                                                                                                |
| 8647.1       | 8647           | ABC11       | ATP-binding cassette, sub-family B (MDR/TAP), member 1                                                                                     | Aliases: ABC16, SPGP, PFIC-2, PFIC2, PGY4/HUGO ID: 42/UniProt ID: Q95342/                                                                                         |
| 54407.1      | 54407          | SLC38A2     | solute carrier family 38, member 2                                                                                                         | Aliases: SAT2, ATA2, KIAA1382/HUGO ID: 13448/UniProt ID: Q96QD8/                                                                                                  |
| 6570.1       | 6570           | SLC18A1     | solute carrier family 18 (vesicular monoamine), member 1                                                                                   | Aliases: CGAT/HUGO ID: 10934/UniProt ID: P54219/                                                                                                                  |
| 2352.1       | 2352           | FOLR3       | folate receptor 3 (gamma)                                                                                                                  | Aliases: FR-G/HUGO ID: 3795/UniProt ID: P41439/                                                                                                                   |

| Abbreviation | Entrez Gene ID | Gene Symbol | Putative Function                                                                                    | Additional notes                                                                                                                           |
|--------------|----------------|-------------|------------------------------------------------------------------------------------------------------|--------------------------------------------------------------------------------------------------------------------------------------------|
| 64131.1      | 64131          | XYLT1       | xylosyltransferase 1                                                                                 | Aliases: XT-1/HUGO ID: 15516/UniProt ID: Q86Y38/                                                                                           |
| 64600.1      | 64600          | PLA2G2F     | phospholipase A2, group IIF                                                                          | Locus type: gene with protein product, function known or inferred/HUGO ID: 30040/UniProt ID: Q9BZM2/                                       |
| 8574.1       | 8574           | AKR7A2      | aldo-keto reductase family 7, member A2 (aflatoxin aldehyde reductase)                               | Aliases: AFAR/HUGO ID: 389/UniProt ID: O43488/                                                                                             |
| 51022.1      | 51022          | GLRX2       | glutaredoxin 2                                                                                       | Aliases: GRX2/HUGO ID: 16065/UniProt ID: Q96JCO/                                                                                           |
| 81031.1      | 81031          | SLC2A10     | solute carrier family 2 (facilitated glucose transporter), member 10                                 | Aliases: GLUT10/HUGO ID: 13444/UniProt ID: O95528/                                                                                         |
| 51181.1      | 51181          | DCXR        | dicarbonyl/L-xylulose reductase                                                                      | Aliases: KIDCR, DCR/HUGO ID: 18985/MGD ID: MGI:1915130/                                                                                    |
| 55821.1      | 55821          | ALLC        | allantoicase                                                                                         | Aliases: ALC/HUGO ID: 17377/UniProt ID: Q8N6M5/MGD ID: MGI:2136971/                                                                        |
| 9023.1       | 9023           | CH25H       | cholesterol 25-hydroxylase                                                                           | Locus type: gene with protein product, function known or inferred/HUGO ID: 1907/UniProt ID: O95992/                                        |
| 79646.1      | 79646          | PANK3       | pantothenate kinase 3                                                                                | Aliases: FLJ12899/HUGO ID: 19365/UniProt ID: Q9H999/                                                                                       |
| 23315.1      | 23315          | SLC9A8      | solute carrier family 9 (sodium/hydrogen exchanger), isoform 8                                       | Locus type: gene with protein product, function known or inferred/Aliases: KIAA0939, NHE8/HUGO ID: 20728/UniProt ID: Q9Y2E8/               |
| 9954.1       | 9954           | HS3ST3A2    | heparan sulfate (glucosamine) 3-O-sulfotransferase 3A2                                               | Aliases: 3OST3A2/HUGO ID: 5197/                                                                                                            |
| 1757.1       | 1757           | SARDH       | sarcosine dehydrogenase                                                                              | Aliases: SDH/HUGO ID: 10536/UniProt ID: Q9UL12/                                                                                            |
| 79837.1      | 79837          | PIP5K2C     | phosphatidylinositol-4-phosphate 5-kinase, type II, gamma                                            | Locus type: gene with protein product, function known or inferred/Aliases: FLJ22055/HUGO ID: 23786/UniProt ID: Q8TBX8/                     |
| 26275.1      | 26275          | HIBCH       | 3-hydroxyisobutyryl-Coenzyme A hydrolase                                                             | HUGO ID: 4908/UniProt ID: Q92931/                                                                                                          |
| 9123.1       | 9123           | SLC16A3     | solute carrier family 16 (monocarboxylic acid transporters), member 3                                | Locus type: gene with protein product, function known or inferred/Aliases: MCT3/HUGO ID: 10924/UniProt ID: O15427/                         |
| 6517.1       | 6517           | SLC2A4      | solute carrier family 2 (facilitated glucose transporter), member 4                                  | HUGO ID: 11009/UniProt ID: P14672/                                                                                                         |
| 6530.1       | 6530           | SLC6A2      | solute carrier family 6 (neurotransmitter transporter, noradrenalin), member 2                       | HUGO ID: 11048/UniProt ID: P23975/                                                                                                         |
| 6547.1       | 6547           | SLC8A3      | solute carrier family 8 (sodium-calcium exchanger), member 3                                         | Aliases: NCX3/HUGO ID: 11070/UniProt ID: P57103/                                                                                           |
| 53343.1      | 53343          | NUDT9       | nudix (nucleoside diphosphate linked moiety X)-type motif 9                                          | Aliases: MGC3037/HUGO ID: 8056/UniProt ID: Q9BW91/                                                                                         |
| 5151.1       | 5151           | PDE8A       | phosphodiesterase 8A                                                                                 | Locus type: gene with protein product, function known or inferred/Aliases: HST19550/HUGO ID: 8793/UniProt ID: O60658/                      |
| 79369.1      | 79369          | B3GNT4      | UDP-GlcNAc:betaGal beta-1,3-N-acetylglucosaminyltransferase 4                                        | Aliases: B3GN-T4, beta3Gn-T4/HUGO ID: 15683/UniProt ID: Q8ND21/                                                                            |
| 10599.1      | 10599          | SLCO1B1     | solute carrier organic anion transporter family, member 1B1                                          | Locus type: gene with protein product, function known or inferred/Aliases: OATP-C, LST-1, OATP1B1/HUGO ID: 10959/UniProt ID: Q9Y6L6/       |
| 26266.1      | 26266          | SLC13A4     | solute carrier family 13 (sodium/sulfate symporters), member 4                                       | Aliases: SUT-1/HUGO ID: 15827/UniProt ID: Q9UKG4/                                                                                          |
| 166785.1     | 166785         | MMAA        | methylmalonic aciduria (cobalamin deficiency) type A                                                 | Locus type: gene with protein product, function known or inferred/HUGO ID: 18871/UniProt ID: Q8IVH4/                                       |
| 54187.1      | 54187          | NANS        | N-acetylneuraminic acid synthase (sialic acid synthase)                                              | Locus type: gene with protein product, function known or inferred/Aliases: SAS/HUGO ID: 19237/UniProt ID: Q9NR45/                          |
| 493.1        | 493            | ATP2B4      | ATPase, Ca <sup>++</sup> transporting, plasma membrane 4                                             | Aliases: PMCA4/HUGO ID: 817/UniProt ID: P23634/                                                                                            |
| 954.1        | 954            | ENTPD2      | ectonucleoside triphosphate diphosphohydrolase 2                                                     | Aliases: NTPDase-2/HUGO ID: 3364/UniProt ID: Q9Y5L3/                                                                                       |
| 55089.1      | 55089          | SLC38A4     | solute carrier family 38, member 4                                                                   | Aliases: PAAT, NAT3, ATA3/HUGO ID: 14679/UniProt ID: Q96916/                                                                               |
| 135152.1     | 135152         | B3GAT2      | beta-1,3-glucuronyltransferase 2 (glucuronosyltransferase S)                                         | Locus type: gene with protein product, function known or inferred/Aliases: GlcAT-S/HUGO ID: 922/UniProt ID: Q9NPZ5/                        |
| 6582.1       | 6582           | SLC22A2     | solute carrier family 22 (organic cation transporter), member 2                                      | Aliases: 38262/HUGO ID: 10966/UniProt ID: O15244/                                                                                          |
| 81539.1      | 81539          | SLC38A1     | solute carrier family 38, member 1                                                                   | Aliases: ATA1, NAT2, SAT1/HUGO ID: 13447/UniProt ID: Q9H2Q2/                                                                               |
| 9951.1       | 9951           | HS3ST4      | heparan sulfate (glucosamine) 3-O-sulfotransferase 4                                                 | Locus type: gene with protein product, function known or inferred/Aliases: 3OST4/HUGO ID: 5200/UniProt ID: Q8NDC2/                         |
| 117247.1     | 117247         | SLC16A10    | solute carrier family 16 (monocarboxylic acid transporters), member 10                               | Aliases: TAT1/HUGO ID: 17027/UniProt ID: Q8TF71/                                                                                           |
| 23169.1      | 23169          | SLC35D1     | solute carrier family 35 (UDP-glucuronic acid/UDP-N-acetylgalactosamine dual transporter), member D1 | Locus type: gene with protein product, function known or inferred/Aliases: UGTREL7, KIAA0260/HUGO ID: 20800/UniProt ID: Q9NTN3/            |
| 6534.1       | 6534           | SLC6A7      | solute carrier family 6 (neurotransmitter transporter, L-proline), member 7                          | Aliases: PROT/HUGO ID: 11054/UniProt ID: Q99884/                                                                                           |
| 8908.1       | 8908           | GYG2        | glycogenin 2                                                                                         | Locus type: gene with protein product, function unknown/Aliases: GN-2/HUGO ID: 4700/UniProt ID: O15488/                                    |
| 6573.1       | 6573           | SLC19A1     | solute carrier family 19 (folate transporter), member 1                                              | Aliases: FOLT/HUGO ID: 10937/UniProt ID: P41440/                                                                                           |
| 2713.1       | 2713           | GKP3        | glycerol kinase pseudogene 3                                                                         | Locus type: pseudogene/HUGO ID: 4292/UniProt ID: Q14409/                                                                                   |
| 9942.1       | 9942           | XYLB        | xylulokinase homolog (H. influenzae)                                                                 | Locus type: gene with protein product, function known or inferred/Aliases: FLJ10343, FLJ22075, FLJ12539/HUGO ID: 12839/UniProt ID: O75191/ |
| 200010.1     | 200010         | SLC5A9      | solute carrier family 5 (sodium/glucose cotransporter), member 9                                     | Locus type: gene with protein product, function known or inferred/Aliases: SGLT4/HUGO ID: 22146/                                           |
| 84679.1      | 84679          | SLC9A7      | solute carrier family 9 (sodium/hydrogen exchanger), isoform 7                                       | Aliases: NHE7/HUGO ID: 17123/UniProt ID: Q96T83/                                                                                           |
| 55326.1      | 55326          | AGPAT5      | 1-acylglycerol-3-phosphate O-acyltransferase 5 (lysophosphatidic acid acyltransferase, epsilon)      | Locus type: gene with protein product, function known or inferred/Aliases: FLJ11210, LPAAT-e/HUGO ID: 20886/MGD ID: MGI:1196345/           |

| Abbreviation | Entrez Gene ID | Gene Symbol | Putative Function                                                                                                               | Additional notes                                                                                                                         |
|--------------|----------------|-------------|---------------------------------------------------------------------------------------------------------------------------------|------------------------------------------------------------------------------------------------------------------------------------------|
| 125206.1     | 125206         | SLC5A10     | solute carrier family 5 (sodium/glucose cotransporter), member 10                                                               | Locus type: gene with protein product, function known or inferred/Aliases: SGLT5/HUGO ID: 23155/                                         |
| 130013.1     | 130013         | ACMSD       | aminocarboxymuconate semialdehyde decarboxylase                                                                                 | HUGO ID: 19288/UniProt ID: Q8TDX5/                                                                                                       |
| 389015.1     | 389015         | SLC9A4      | solute carrier family 9 (sodium/hydrogen exchanger), isoform 4                                                                  | Locus type: gene with protein product, function known or inferred/Aliases: NHE4/HUGO ID: 11077/transcript: NM_001011552                  |
| 58508.1      | 58508          | MLL3        | myeloid/lymphoid or mixed-lineage leukemia 3                                                                                    | Aliases: KIAA1506, HALR/HUGO ID: 13726/UniProt ID: Q8NEZ4/                                                                               |
| 4507.1       | 4507           | MTAP        | methylthioadenosine phosphorylase                                                                                               | Locus type: gene with protein product, function known or inferred/Aliases: MSAP, c86fus/HUGO ID: 7413/UniProt ID: Q13126/                |
| 64850.1      | 64850          | AGXT2L1     | alanine-glyoxylate aminotransferase 2-like 1                                                                                    | HUGO ID: 14404/UniProt ID: Q8TBG4/                                                                                                       |
| 84693.1      | 84693          | MCEE        | methylmalonyl CoA epimerase                                                                                                     | HUGO ID: 16732/UniProt ID: Q8WW63/                                                                                                       |
| 115019.1     | 115019         | SLC26A9     | solute carrier family 26, member 9                                                                                              | HUGO ID: 14469/UniProt ID: Q96PK9/                                                                                                       |
| 81490.1      | 81490          | PTDSS2      | phosphatidylserine synthase 2                                                                                                   | Aliases: PSS2/HUGO ID: 15463/UniProt ID: Q9BVG9/                                                                                         |
| 4844.1       | 4844           | NOS2B       | nitric oxide synthase 2B                                                                                                        | Locus type: gene with protein product, function known or inferred/HUGO ID: 7874/UniProt ID: P81272/                                      |
| 6649.1       | 6649           | SOD3        | superoxide dismutase 3, extracellular                                                                                           | HUGO ID: 11181/UniProt ID: P08294/                                                                                                       |
| 11046.1      | 11046          | SLC35D2     | solute carrier family 35, member D2                                                                                             | Locus type: gene with protein product, function unknown/Aliases: UGTrel8, SQV7L/HUGO ID: 20799/UniProt ID: O95454/                       |
| 23396.1      | 23396          | PIP5K1C     | phosphatidylinositol-4-phosphate 5-kinase, type I, gamma                                                                        | Aliases: PIP5Kgamma, KIAA0589 gene/HUGO ID: 8996/UniProt ID: O60331/                                                                     |
| 6508.1       | 6508           | SLC4A3      | solute carrier family 4, anion exchanger, member 3                                                                              | Aliases: AE3, SLC2C/HUGO ID: 11029/UniProt ID: P48751/                                                                                   |
| 347734.1     | 347734         | SLC35B2     | solute carrier family 35, member B2                                                                                             | Locus type: gene with protein product, function known or inferred/Aliases: UGTrel4/HUGO ID: 16872/UniProt ID: Q8TB61/                    |
| 112483.1     | 112483         | SAT2        | spermidine/spermine N1-acetyltransferase 2                                                                                      | Locus type: gene with protein product, function known or inferred/Aliases: SSAT2/HUGO ID: 23160/UniProt ID: Q96F10/                      |
| 256435.1     | 256435         | SIAT7C      | sialyltransferase 7 ((alpha-N-acetylneuraminyl-2,3-beta-galactosyl-1,3)-N-acetyl galactosaminide alpha-2,6-sialyltransferase) C | Locus type: gene with protein product, function known or inferred/Aliases: ST6GALNAC III/HUGO ID: 19343/UniProt ID: Q8N259/              |
| 116255.1     | 116255         | MOGAT1      | monoacylglycerol O-acyltransferase 1                                                                                            | Locus type: gene with protein product, function known or inferred/Aliases: DGAT2L, MGAT1/HUGO ID: 18210/UniProt ID: Q96PD6/ MGI:1915643/ |
| 6521.1       | 6521           | SLC4A1      | solute carrier family 4, anion exchanger, member 1 (erythrocyte membrane protein band 3, Diego blood group)                     | Locus type: gene with protein product, function known or inferred/Aliases: RTA1A, HGNC:12753, CD233/HUGO ID: 11027/UniProt ID: P02730/   |
| 6560.1       | 6560           | SLC12A4     | solute carrier family 12 (potassium/chloride transporters), member 4                                                            | Locus type: gene with protein product, function known or inferred/Aliases: KCC1/HUGO ID: 10913/UniProt ID: Q9UP95/                       |
| 9415.1       | 9415           | FADS2       | fatty acid desaturase 2                                                                                                         | Aliases: FADSD6, D6D, TU13, DES6, SL10262/HUGO ID: 3575/UniProt ID: O95864/                                                              |
| 64841.1      | 64841          | GNPNAT1     | glucosamine-phosphate N-acetyltransferase 1                                                                                     | Locus type: gene with protein product, function known or inferred/Aliases: Gpnat1, FLJ10607/HUGO ID: 19980/UniProt ID: Q96EK6/           |
| 55902.1      | 55902          | ACAS2       | acetyl-Coenzyme A synthetase 2 (ADP forming)                                                                                    | Aliases: LOC55902, ACS, dJ1161H23.1/HUGO ID: 15814/UniProt ID: Q9NR19/                                                                   |
| 2530.2       | 2530           | FUT8        | fucosyltransferase 8 (alpha (1,6) fucosyltransferase)                                                                           | HUGO ID: 4019/UniProt ID: Q9BYC5/                                                                                                        |
| 440.3        | 440            | ASNS        | asparagine synthetase                                                                                                           | Locus type: gene with protein product, function known or inferred/HUGO ID: 753/UniProt ID: P08243/                                       |
| 5332.2       | 5332           | PLCB4       | phospholipase C, beta 4                                                                                                         | HUGO ID: 9059/UniProt ID: Q15147/                                                                                                        |
| 5831.2       | 5831           | PYCR1       | pyroline-5-carboxylate reductase 1                                                                                              | Aliases: P5C/HUGO ID: 9721/UniProt ID: P32322/                                                                                           |
| 5152.15      | 5152           | PDE9A       | phosphodiesterase 9A                                                                                                            | HUGO ID: 8795/UniProt ID: O76083/                                                                                                        |
| 6547.5       | 6547           | SLC8A3      | solute carrier family 8 (sodium-calcium exchanger), member 3                                                                    | Aliases: NCX3/HUGO ID: 11070/UniProt ID: P57103/                                                                                         |
| 1716.3       | 1716           | DGUOK       | deoxyguanosine kinase                                                                                                           | Aliases: dGK/HUGO ID: 2858/UniProt ID: Q16854/                                                                                           |
| 3098.4       | 3098           | HK1         | hexokinase 1                                                                                                                    | Locus type: gene with protein product, function known or inferred/HUGO ID: 4922/UniProt ID: P19367/                                      |
| 11282.2      | 11282          | MGAT4B      | mannosyl (alpha-1,3-)-glycoprotein beta-1,4-N-acetylglucosaminyltransferase, isoenzyme B                                        | Locus type: gene with protein product, function known or inferred/Aliases: GnT-IVb/HUGO ID: 7048/UniProt ID: Q9UQ53/                     |
| 5152.5       | 5152           | PDE9A       | phosphodiesterase 9A                                                                                                            | HUGO ID: 8795/UniProt ID: O76083/                                                                                                        |
| 7296.4       | 7296           | TXNRD1      | thioredoxin reductase 1                                                                                                         | Locus type: gene with protein product, function known or inferred/Aliases: TXNR/HUGO ID: 12437/UniProt ID: Q16881/                       |
| 10861.3      | 10861          | SLC26A1     | solute carrier family 26 (sulfate transporter), member 1                                                                        | Locus type: gene with protein product, function known or inferred/Aliases: SAT-1, EDM4/HUGO ID: 10993/UniProt ID: Q9H2B4/                |
| 2944.2       | 2944           | GSTM1       | glutathione S-transferase M1                                                                                                    | Locus type: gene with protein product, function known or inferred/Aliases: MU, H-B, GST1/HUGO ID: 4632/UniProt ID: P09488/               |
| 115019.2     | 115019         | SLC26A9     | solute carrier family 26, member 9                                                                                              | HUGO ID: 14469/UniProt ID: Q96PK9/                                                                                                       |
| 2592.3       | 2592           | GALT        | galactose-1-phosphate uridylyltransferase                                                                                       | HUGO ID: 4135/UniProt ID: P07902/                                                                                                        |
| 7173.2       | 7173           | TPO         | thyroid peroxidase                                                                                                              | HUGO ID: 12015/UniProt ID: P07202/                                                                                                       |
| 10317.3      | 10317          | B3GALT5     | UDP-Gal:betaGlcNAc beta 1,3-galactosyltransferase, polypeptide 5                                                                | Aliases: beta3Gal-T5/HUGO ID: 920/UniProt ID: Q9Y2C3/                                                                                    |
| 374907.2     | 374907         | B3GALT7     | UDP-Gal:betaGal beta 1,3-galactosyltransferase polypeptide 7                                                                    | Locus type: gene with protein product, function known or inferred/Aliases: BGALT15/HUGO ID: 24139/                                       |
| 204.3        | 204            | AK2         | adenylate kinase 2                                                                                                              | Locus type: gene with protein product, function known or inferred/HUGO ID: 362/UniProt ID: P54819/                                       |
| 122622.2     | 122622         | ADSSL1      | adenylosuccinate synthase like 1                                                                                                | Locus type: gene with protein product, function unknown/Aliases: FLJ38602/HUGO ID: 20093/UniProt ID: Q8N714/                             |
| 6487.10      | 6487           | SIAT6       | sialyltransferase 6 (N-acetylglucosaminide alpha 2,3-sialyltransferase)                                                         | Locus type: gene with protein product, function known or inferred/Aliases: ST3Gal III/HUGO ID: 10866/UniProt ID: Q11203/                 |

| Abbreviation | Entrez Gene ID | Gene Symbol | Putative Function                                                                        | Additional notes                                                                                                                                                  |
|--------------|----------------|-------------|------------------------------------------------------------------------------------------|-------------------------------------------------------------------------------------------------------------------------------------------------------------------|
| 622.3        | 622            | BDH1        | 3-hydroxybutyrate dehydrogenase (heart, mitochondrial)                                   | HUGO ID: 1027/UniProt ID: Q02338/                                                                                                                                 |
| 6487.2       | 6487           | SIAT6       | sialyltransferase 6 (N-acetylglucosaminide alpha 2,3-sialyltransferase)                  | Locus type: gene with protein product, function known or inferred/Aliases: ST3Gal III/HUGO ID: 10866/UniProt ID: Q11203/                                          |
| 9551.2       | 9551           | ATP5J2      | ATP synthase, H+ transporting, mitochondrial F0 complex, subunit f, isoform 2            | Aliases: F1Fo-ATPase/HUGO ID: 848/UniProt ID: P56134/                                                                                                             |
| 7001.2       | 7001           | PRDX2       | peroxiredoxin 2                                                                          | Aliases: PRP, NKEFB/HUGO ID: 9353/UniProt ID: P32119/                                                                                                             |
| 4952.2       | 4952           | OCRL        | oculocerebrorenal syndrome of Lowe                                                       | HUGO ID: 8108/UniProt ID: Q01968/                                                                                                                                 |
| 84720.2      | 84720          | PIGO        | phosphatidylinositol glycan, class O                                                     | Locus type: gene with protein product, function known or inferred/Aliases: DKFZp434M222, FLJ00135/HUGO ID: 23215/UniProt ID: Q8TEQ8/                              |
| 80142.3      | 80142          | PTGES2      | prostaglandin E synthase 2                                                               | Aliases: FLJ14038/HUGO ID: 17822/UniProt ID: Q9H7Z7/                                                                                                              |
| 10423.2      | 10423          | CDIPT       | CDP-diacylglycerol--inositol 3-phosphatidyltransferase (phosphatidylinositol synthase)   | Locus type: gene with protein product, function known or inferred/Aliases: PIS1, PIS/HUGO ID: 1769/UniProt ID: O14735/                                            |
| 5224.2       | 5224           | PGAM2       | phosphoglycerate mutase 2 (muscle)                                                       | HUGO ID: 8889/UniProt ID: P15259/                                                                                                                                 |
| 3948.2       | 3948           | LDHC        | lactate dehydrogenase C                                                                  | HUGO ID: 6544/UniProt ID: P07864/                                                                                                                                 |
| 6547.4       | 6547           | SLC8A3      | solute carrier family 8 (sodium-calcium exchanger), member 3                             | Aliases: NCX3/HUGO ID: 11070/UniProt ID: P57103/                                                                                                                  |
| 5211.2       | 5211           | PFKL        | phosphofructokinase, liver                                                               | HUGO ID: 8876/UniProt ID: P17858/                                                                                                                                 |
| 5250.2       | 5250           | SLC25A3     | solute carrier family 25 (mitochondrial carrier; phosphate carrier), member 3            | Locus type: gene with protein product, function known or inferred/HUGO ID: 10989/UniProt ID: Q00325/                                                              |
| 226.2        | 226            | ALDOA       | aldolase A, fructose-bisphosphate                                                        | HUGO ID: 414/UniProt ID: P04075/                                                                                                                                  |
| 5152.16      | 5152           | PDE9A       | phosphodiesterase 9A                                                                     | HUGO ID: 8795/UniProt ID: O76083/                                                                                                                                 |
| 2027.2       | 2027           | ENO3        | enolase 3 (beta, muscle)                                                                 | HUGO ID: 3354/UniProt ID: P13929/                                                                                                                                 |
| 8659.2       | 8659           | ALDH4A1     | aldehyde dehydrogenase 4 family, member A1                                               | Aliases: P5CDh/HUGO ID: 406/UniProt ID: P30038/                                                                                                                   |
| 53343.2      | 53343          | NUDT9       | nudix (nucleoside diphosphate linked moiety X)-type motif 9                              | Aliases: MGC3037/HUGO ID: 8056/UniProt ID: Q9BW91/                                                                                                                |
| 58508.2      | 58508          | MLL3        | myeloid/lymphoid or mixed-lineage leukemia 3                                             | Aliases: KIAA1506, HALR/HUGO ID: 13726/UniProt ID: Q8NEZ4/                                                                                                        |
| 127124.2     | 127124         | ATP6V1G3    | ATPase, H+ transporting, lysosomal 13kDa, V1 subunit G isoform 3                         | Locus type: gene with protein product, function known or inferred/Aliases: ATP6G3, Vma10/HUGO ID: 18265/UniProt ID: Q96L4/MGD ID: MGI:2450548/                    |
| 669.2        | 669            | BPGM        | 2,3-bisphosphoglycerate mutase                                                           | Locus type: gene with protein product, function known or inferred/HUGO ID: 1093/UniProt ID: P07738/                                                               |
| 1716.4       | 1716           | DGUOK       | deoxyguanosine kinase                                                                    | Aliases: dGK/HUGO ID: 2858/UniProt ID: Q16854/                                                                                                                    |
| 2629.5       | 2629           | GBA         | glucosidase, beta; acid (includes glucosylceramidase)                                    | Aliases: GLUC, GBA1/HUGO ID: 4177/UniProt ID: P04062/                                                                                                             |
| 47.2         | 47             | ACLY        | ATP citrate lyase                                                                        | HUGO ID: 115/UniProt ID: P53396/                                                                                                                                  |
| 51703.3      | 51703          | ACSL5       | acyl-CoA synthetase long-chain family member 5                                           | Locus type: gene with protein product, function known or inferred/Aliases: ACS5, ACS2/HUGO ID: 16526/UniProt ID: Q9ULC5/MGD ID: MGI:1919129/                      |
| 3098.3       | 3098           | HK1         | hexokinase 1                                                                             | Locus type: gene with protein product, function known or inferred/HUGO ID: 4922/UniProt ID: P19367/                                                               |
| 1491.2       | 1491           | CTH         | cystathionase (cystathionine gamma-lyase)                                                | Locus type: gene with protein product, function known or inferred/HUGO ID: 2501/UniProt ID: P32929/                                                               |
| 5313.2       | 5313           | PKLR        | pyruvate kinase, liver and RBC                                                           | Locus type: gene with protein product, function known or inferred/HUGO ID: 9020/UniProt ID: P30613/                                                               |
| 5152.2       | 5152           | PDE9A       | phosphodiesterase 9A                                                                     | HUGO ID: 8795/UniProt ID: O76083/                                                                                                                                 |
| 132.2        | 132            | ADK         | adenosine kinase                                                                         | Locus type: gene with protein product, function known or inferred/Aliases: AK/HUGO ID: 257/UniProt ID: P55263/                                                    |
| 93034.2      | 93034          | NT5C1B      | 5'-nucleotidase, cytosolic IB                                                            | Aliases: AIRP, CN-IB/HUGO ID: 17818/UniProt ID: Q96P26/                                                                                                           |
| 7173.5       | 7173           | TPO         | thyroid peroxidase                                                                       | HUGO ID: 12015/UniProt ID: P07202/                                                                                                                                |
| 4882.2       | 4882           | NPR2        | natriuretic peptide receptor B/guanylate cyclase B (atriuretic peptide receptor B)       | Aliases: GUC2B/HUGO ID: 7944/UniProt ID: P20594/                                                                                                                  |
| 8398.2       | 8398           | PLA2G6      | phospholipase A2, group VI (cytosolic, calcium-independent)                              | Aliases: iPLA2/HUGO ID: 9039/UniProt ID: O60733/                                                                                                                  |
| 7054.3       | 7054           | TH          | tyrosine hydroxylase                                                                     | HUGO ID: 11782/UniProt ID: P07101/                                                                                                                                |
| 2592.2       | 2592           | GALT        | galactose-1-phosphate uridylyltransferase                                                | HUGO ID: 4135/UniProt ID: P07902/                                                                                                                                 |
| 518.3        | 518            | ATP5G3      | ATP synthase, H+ transporting, mitochondrial F0 complex, subunit c (subunit 9) isoform 3 | HUGO ID: 843/UniProt ID: P48201/Variant 3: This variant (3) differs in the 5' UTR, compared to variant 1. Transcript variants 1, 2 and 3 encode the same protein. |
| 8525.2       | 8525           | DGKZ        | diacylglycerol kinase, zeta 104kDa                                                       | Aliases: DAGK5, hDGKzeta/HUGO ID: 2857/UniProt ID: Q13574/                                                                                                        |
| 56606.2      | 56606          | SLC2A9      | solute carrier family 2 (facilitated glucose transporter), member 9                      | Aliases: Glut9, GLUTX/HUGO ID: 13446/UniProt ID: Q9NRM0/                                                                                                          |
| 8527.2       | 8527           | DGKD        | diacylglycerol kinase, delta 130kDa                                                      | Aliases: KIAA0145, DGKdelta/HUGO ID: 2851/UniProt ID: Q16760/                                                                                                     |
| 6487.11      | 6487           | SIAT6       | sialyltransferase 6 (N-acetylglucosaminide alpha 2,3-sialyltransferase)                  | Locus type: gene with protein product, function known or inferred/Aliases: ST3Gal III/HUGO ID: 10866/UniProt ID: Q11203/                                          |
| 5277.2       | 5277           | PIGA        | phosphatidylinositol glycan, class A (paroxysmal nocturnal hemoglobinuria)               | Aliases: GPI3/HUGO ID: 8957/UniProt ID: P37287/                                                                                                                   |
| 6480.2       | 6480           | SIAT1       | sialyltransferase 1 (beta-galactoside alpha-2,6-sialyltransferase)                       | Aliases: CD75, ST6Gal I/HUGO ID: 10860/UniProt ID: P15907/                                                                                                        |
| 204.2        | 204            | AK2         | adenylate kinase 2                                                                       | Locus type: gene with protein product, function known or inferred/HUGO ID: 362/UniProt ID: P54819/                                                                |
| 51227.2      | 51227          | DSCR5       | Down syndrome critical region gene 5                                                     | Aliases: DCRC, DSRC/HUGO ID: 3046/UniProt ID: P57054/                                                                                                             |
| 5151.2       | 5151           | PDE8A       | phosphodiesterase 8A                                                                     | Locus type: gene with protein product, function known or inferred/Aliases: HsT19550/HUGO ID: 8793/UniProt ID: O60658/                                             |
| 3614.2       | 3614           | IMPDH1      | IMP (inosine monophosphate) dehydrogenase 1                                              | Aliases: sWSS2608/HUGO ID: 6052/UniProt ID: P20839/                                                                                                               |



| Abbreviation | Entrez Gene ID | Gene Symbol | Putative Function                                                                                                     | Additional notes                                                                                                                                                                                                                                   |
|--------------|----------------|-------------|-----------------------------------------------------------------------------------------------------------------------|----------------------------------------------------------------------------------------------------------------------------------------------------------------------------------------------------------------------------------------------------|
| 7001.3       | 7001           | PRDX2       | peroxiredoxin 2                                                                                                       | Aliases: PRP, NKEFB/HUGO ID: 9353/UniProt ID: P32119/                                                                                                                                                                                              |
| 276.2        | 276            | AMY1A       | amylase, alpha 1A; salivary                                                                                           | HUGO ID: 474/UniProt ID: P04745/                                                                                                                                                                                                                   |
| 5152.17      | 5152           | PDE9A       | phosphodiesterase 9A                                                                                                  | HUGO ID: 8795/UniProt ID: O76083/                                                                                                                                                                                                                  |
| 5052.3       | 5052           | PRDX1       | peroxiredoxin 1                                                                                                       | Locus type: gene with protein product, function known or inferred/Aliases: NKEFA/HUGO ID: 9352/UniProt ID: Q06830/                                                                                                                                 |
| 6487.9       | 6487           | SIAT6       | sialyltransferase 6 (N-acetylglucosaminide alpha 2,3-sialyltransferase)                                               | Locus type: gene with protein product, function known or inferred/Aliases: ST3Gal III/HUGO ID: 10866/UniProt ID: Q11203/                                                                                                                           |
| 80142.2      | 80142          | PTGES2      | prostaglandin E synthase 2                                                                                            | Aliases: FLJ14038/HUGO ID: 17822/UniProt ID: Q9H7Z7/                                                                                                                                                                                               |
| 2678.3       | 2678           | GGT1        | gamma-glutamyltransferase 1                                                                                           | Aliases: D22S672, D22S732, CD224/HUGO ID: 4250/UniProt ID: P19440/                                                                                                                                                                                 |
| 9551.3       | 9551           | ATP5J2      | ATP synthase, H+ transporting, mitochondrial F0 complex, subunit f, isoform 2                                         | Aliases: F1Fo-ATPase/HUGO ID: 848/UniProt ID: P56134/                                                                                                                                                                                              |
| 53343.3      | 53343          | NUDT9       | nudix (nucleoside diphosphate linked moiety X)-type motif 9                                                           | Aliases: MGC3037/HUGO ID: 8056/UniProt ID: Q9BW91/                                                                                                                                                                                                 |
| 8706.4       | 8706           | B3GALT3     | UDP-Gal:betaGlcNAc beta 1,3-galactosyltransferase, polypeptide 3                                                      | Locus type: gene with protein product, function known or inferred/Aliases: beta3Gal-T3, galT3, P1/HUGO ID: 918/UniProt ID: O75752/                                                                                                                 |
| 515.2        | 515            | ATP5F1      | ATP synthase, H+ transporting, mitochondrial F0 complex, subunit b, isoform 1                                         | HUGO ID: 840/UniProt ID: P24539/                                                                                                                                                                                                                   |
| 226.3        | 226            | ALDOA       | aldolase A, fructose-bisphosphate                                                                                     | HUGO ID: 414/UniProt ID: P04075/                                                                                                                                                                                                                   |
| 5140.2       | 5140           | PDE3B       | phosphodiesterase 3B, cGMP-inhibited                                                                                  | HUGO ID: 8779/UniProt ID: Q13370/                                                                                                                                                                                                                  |
| 1716.5       | 1716           | DGUOK       | deoxyguanosine kinase                                                                                                 | Aliases: dGK/HUGO ID: 2858/UniProt ID: Q16854/                                                                                                                                                                                                     |
| 43.2         | 43             | ACHE        | acetylcholinesterase (YT blood group)                                                                                 | Locus type: gene with protein product, function known or inferred/HUGO ID: 108/UniProt ID: P22303/                                                                                                                                                 |
| 8818.2       | 8818           | DPM2        | dolichyl-phosphate mannosyltransferase polypeptide 2, regulatory subunit                                              | Locus type: gene with protein product, function known or inferred/HUGO ID: 3006/UniProt ID: O94777/                                                                                                                                                |
| 2530.4       | 2530           | FUT8        | fucosyltransferase 8 (alpha (1,6) fucosyltransferase)                                                                 | HUGO ID: 4019/UniProt ID: Q9BYC5/                                                                                                                                                                                                                  |
| 5092.2       | 5092           | PCBD        | 6-pyruvoyl-tetrahydropterin synthase/dimerization cofactor of hepatocyte nuclear factor 1 alpha (TCF1)                | Locus type: gene with protein product, function known or inferred/Aliases: PCD/HUGO ID: 8646/UniProt ID: P80095/                                                                                                                                   |
| 5315.2       | 5315           | PKM2        | pyruvate kinase, muscle                                                                                               | Aliases: THBP1, OIP3/HUGO ID: 9021/UniProt ID: P14618/                                                                                                                                                                                             |
| 53354.2      | 53354          | PANK1       | pantothenate kinase 1                                                                                                 | Locus type: gene with protein product, function known or inferred/Aliases: MGC24596, PANK1a, PANK1b/HUGO ID: 8598/UniProt ID: Q8TE04/                                                                                                              |
| 3420.2       | 3420           | IDH3B       | isocitrate dehydrogenase 3 (NAD+) beta                                                                                | HUGO ID: 5385/UniProt ID: O43837/                                                                                                                                                                                                                  |
| 1558.2       | 1558           | CYP2C8      | cytochrome P450, family 2, subfamily C, polypeptide 8                                                                 | Locus type: gene with protein product, function known or inferred/Aliases: CPC8/HUGO ID: 2622/UniProt ID: P10632/                                                                                                                                  |
| 51703.2      | 51703          | ACSL5       | acyl-CoA synthetase long-chain family member 5                                                                        | Locus type: gene with protein product, function known or inferred/Aliases: ACS5, ACS2/HUGO ID: 16526/UniProt ID: Q9ULC5/MGD ID: MGI:1919129/                                                                                                       |
| 4731.2       | 4731           | NDUFV3      | NADH dehydrogenase (ubiquinone) flavoprotein 3, 10kDa                                                                 | HUGO ID: 7719/UniProt ID: P56181/                                                                                                                                                                                                                  |
| 284273.2     | 284273         | ZADH2       | zinc binding alcohol dehydrogenase, domain containing 2                                                               | Locus type: gene with protein product, function unknown/Aliases: MGC45594/HUGO ID: 28697/MGD ID: MGI:2444835/                                                                                                                                      |
| 498.3        | 498            | ATP5A1      | ATP synthase, H+ transporting, mitochondrial F1 complex, alpha subunit, isoform 1, cardiac muscle                     | Locus type: gene with protein product, function known or inferred/Aliases: ATP5A, hATP1, ATPM, OMR, ORM, HGNC:826/HUGO ID: 823/UniProt ID: P25705/                                                                                                 |
| 51.2         | 51             | ACOX1       | acyl-Coenzyme A oxidase 1, palmitoyl                                                                                  | Aliases: PALMCOX/HUGO ID: 119/UniProt ID: Q15067/                                                                                                                                                                                                  |
| 84264.2      | 84264          | HAGHL       | hydroxyacylglutathione hydrolase-like                                                                                 | Locus type: gene with protein product, function known or inferred/Aliases: MGC2605/HUGO ID: 14177/UniProt ID: Q9BT45/                                                                                                                              |
| 29922.2      | 29922          | NME7        | non-metastatic cells 7, protein expressed in (nucleoside-diphosphate kinase)                                          | Locus type: gene with protein product, function known or inferred/HUGO ID: 20461/UniProt ID: Q9Y5B8/MGD ID: MGI:2449121/                                                                                                                           |
| 3704.2       | 3704           | ITPA        | inosine triphosphatase (nucleoside triphosphate pyrophosphatase)                                                      | Aliases: HGNC:15883, HLC14-06-P, dJ794I6.3/HUGO ID: 6176/UniProt ID: Q9BY32/                                                                                                                                                                       |
| 7173.4       | 7173           | TPO         | thyroid peroxidase                                                                                                    | HUGO ID: 12015/UniProt ID: P07202/                                                                                                                                                                                                                 |
| 178.6        | 178            | AGL         | amylase-1, 6-glucosidase, 4-alpha-glucanotransferase (glycogen debranching enzyme, glycogen storage disease type III) | Locus type: gene with protein product, function known or inferred/HUGO ID: 321/UniProt ID: P35573/MGD ID: MGI:1924809/                                                                                                                             |
| 518.2        | 518            | ATP5G3      | ATP synthase, H+ transporting, mitochondrial F0 complex, subunit c (subunit 9) isoform 3                              | HUGO ID: 843/UniProt ID: P48201/Variant 2: This variant differs in the 5' UTR, compared to variant 1. Transcript variants 1, 2 and 3 encode the same protein.                                                                                      |
| 51004.2      | 51004          | COQ6        | coenzyme Q6 homolog (yeast)                                                                                           | Locus type: gene with protein product, function unknown/Aliases: CGI-10/HUGO ID: 20233/UniProt ID: Q9Y2Z9/                                                                                                                                         |
| 7054.2       | 7054           | TH          | tyrosine hydroxylase                                                                                                  | HUGO ID: 11782/UniProt ID: P07101/                                                                                                                                                                                                                 |
| 51227.3      | 51227          | DSCR5       | Down syndrome critical region gene 5                                                                                  | Aliases: DCRC, DSRC/HUGO ID: 3046/UniProt ID: P57054/                                                                                                                                                                                              |
| 52.2         | 52             | ACP1        | acid phosphatase 1, soluble                                                                                           | HUGO ID: 122/UniProt ID: P24666/                                                                                                                                                                                                                   |
| 10195.4      | 10195          | ALG3        | asparagine-linked glycosylation 3 homolog (yeast, alpha-1,3-mannosyltransferase)                                      | Locus type: gene with protein product, function known or inferred/Aliases: NOT56L, Not56, CDGS4, D16Erd36e/HUGO ID: 23056/UniProt ID: Q92685/MGD ID: MGI:1098592/                                                                                  |
| 5152.18      | 5152           | PDE9A       | phosphodiesterase 9A                                                                                                  | HUGO ID: 8795/UniProt ID: O76083/                                                                                                                                                                                                                  |
| 6120.2       | 6120           | RPE         | ribulose-5-phosphate-3-epimerase                                                                                      | HUGO ID: 10293/UniProt ID: Q96AT9/                                                                                                                                                                                                                 |
| 528.2        | 528            | ATP6V1C1    | ATPase, H+ transporting, lysosomal 42kDa, V1 subunit C, isoform 1                                                     | Aliases: ATP6D, VATC, Vma5/HUGO ID: 856/UniProt ID: P21283/                                                                                                                                                                                        |
| 517.2        | 517            | ATP5G2      | ATP synthase, H+ transporting, mitochondrial F0 complex, subunit c (subunit 9), isoform 2                             | HUGO ID: 842/UniProt ID: Q06055/Variant 2: This variant differs in the 5' UTR and the 5' coding region, and uses a downstream start codon, compared to variant 1. The resulting isoform (2b) has a shorter N-terminus when compared to isoform 2a. |
| 5152.6       | 5152           | PDE9A       | phosphodiesterase 9A                                                                                                  | HUGO ID: 8795/UniProt ID: O76083/                                                                                                                                                                                                                  |

| Abbreviation | Entrez Gene ID | Gene Symbol | Putative Function                                                                                                   | Additional notes                                                                                                                                                  |
|--------------|----------------|-------------|---------------------------------------------------------------------------------------------------------------------|-------------------------------------------------------------------------------------------------------------------------------------------------------------------|
| 10768.2      | 10768          | AHCYL1      | S-adenosylhomocysteine hydrolase-like 1                                                                             | Aliases: XPVKONA/HUGO ID: 344/UniProt ID: O43865/                                                                                                                 |
| 90161.2      | 90161          | HS6ST2      | heparan sulfate 6-O-sulfotransferase 2                                                                              | Locus type: gene with protein product, function known or inferred/HUGO ID: 19133/UniProt ID: Q96MM7/                                                              |
| 6547.3       | 6547           | SLC8A3      | solute carrier family 8 (sodium-calcium exchanger), member 3                                                        | Aliases: NCX3/HUGO ID: 11070/UniProt ID: P57103/                                                                                                                  |
| 51447.3      | 51447          | IHPK2       | inositol hexaphosphate kinase 2                                                                                     | Aliases: IP6K2/HUGO ID: 17313/UniProt ID: Q9H4P7/                                                                                                                 |
| 6487.4       | 6487           | SIAT6       | sialyltransferase 6 (N-acetylglucosaminide alpha 2,3-sialyltransferase)                                             | Locus type: gene with protein product, function known or inferred/Aliases: ST3Gal III/HUGO ID: 10866/UniProt ID: Q11203/                                          |
| 515.3        | 515            | ATP5F1      | ATP synthase, H+ transporting, mitochondrial F0 complex, subunit b, isoform 1                                       | HUGO ID: 840/UniProt ID: P24539/                                                                                                                                  |
| 3098.5       | 3098           | HK1         | hexokinase 1                                                                                                        | Locus type: gene with protein product, function known or inferred/HUGO ID: 4922/UniProt ID: P19367/                                                               |
| 3157.2       | 3157           | HMGCS1      | 3-hydroxy-3-methylglutaryl-Coenzyme A synthase 1 (soluble)                                                          | HUGO ID: 5007/UniProt ID: Q01581/                                                                                                                                 |
| 2948.2       | 2948           | GSTM4       | glutathione S-transferase M4                                                                                        | Locus type: gene with protein product, function known or inferred/HUGO ID: 4636/UniProt ID: Q03013/                                                               |
| 55821.2      | 55821          | ALLC        | allantoicase                                                                                                        | Aliases: ALC/HUGO ID: 17377/UniProt ID: Q8N6M5/MGD ID: MGI:2136971/                                                                                               |
| 2530.3       | 2530           | FUT8        | fucosyltransferase 8 (alpha (1,6) fucosyltransferase)                                                               | HUGO ID: 4019/UniProt ID: Q9BYC5/                                                                                                                                 |
| 5052.2       | 5052           | PRDX1       | peroxiredoxin 1                                                                                                     | Locus type: gene with protein product, function known or inferred/Aliases: NKEFA/HUGO ID: 9352/UniProt ID: Q06830/                                                |
| 498.2        | 498            | ATP5A1      | ATP synthase, H+ transporting, mitochondrial F1 complex, alpha subunit, isoform 1, cardiac muscle                   | Locus type: gene with protein product, function known or inferred/Aliases: ATP5A, hATP1, ATPM, OMR, ORM, HGNC:826/HUGO ID: 823/UniProt ID: P25705/                |
| 5315.3       | 5315           | PKM2        | pyruvate kinase, muscle                                                                                             | Aliases: THBP1, OIP3/HUGO ID: 9021/UniProt ID: P14618/                                                                                                            |
| 2629.3       | 2629           | GBA         | glucosidase, beta; acid (includes glucosylceramidase)                                                               | Aliases: GLUC, GBA1/HUGO ID: 4177/UniProt ID: P04062/                                                                                                             |
| 5152.10      | 5152           | PDE9A       | phosphodiesterase 9A                                                                                                | HUGO ID: 8795/UniProt ID: O76083/                                                                                                                                 |
| 4257.4       | 4257           | MGST1       | microsomal glutathione S-transferase 1                                                                              | Aliases: MGST-1/HUGO ID: 7061/UniProt ID: P10620/                                                                                                                 |
| 2348.3       | 2348           | FOLR1       | folate receptor 1 (adult)                                                                                           | HUGO ID: 3791/UniProt ID: P15328/                                                                                                                                 |
| 53354.3      | 53354          | PANK1       | pantothenate kinase 1                                                                                               | Locus type: gene with protein product, function known or inferred/Aliases: MGC24596, PANK1a, PANK1b/HUGO ID: 8598/UniProt ID: Q8TE04/                             |
| 2582.2       | 2582           | GALE        | UDP-galactose-4-epimerase                                                                                           | Locus type: gene with protein product, function known or inferred/HUGO ID: 4116/UniProt ID: Q14376/                                                               |
| 5244.3       | 5244           | ABCB4       | ATP-binding cassette, sub-family B (MDR/TAP), member 4                                                              | Locus type: gene with protein product, function known or inferred/Aliases: MDR2/3, PFIC-3/HUGO ID: 45/UniProt ID: P21439/                                         |
| 5152.4       | 5152           | PDE9A       | phosphodiesterase 9A                                                                                                | HUGO ID: 8795/UniProt ID: O76083/                                                                                                                                 |
| 6547.2       | 6547           | SLC8A3      | solute carrier family 8 (sodium-calcium exchanger), member 3                                                        | Aliases: NCX3/HUGO ID: 11070/UniProt ID: P57103/                                                                                                                  |
| 10317.2      | 10317          | B3GALT5     | UDP-Gal:betaGlcNAc beta 1,3-galactosyltransferase, polypeptide 5                                                    | Aliases: beta3Gal-T5/HUGO ID: 920/UniProt ID: Q9Y2C3/                                                                                                             |
| 171425.2     | 171425         | CLYBL       | citrate lyase beta like                                                                                             | Locus type: gene with protein product, function known or inferred/Aliases: CLB/HUGO ID: 18355/UniProt ID: Q8N0X4/MGD ID: MGI:1916884/                             |
| 622.2        | 622            | BDH1        | 3-hydroxybutyrate dehydrogenase (heart, mitochondrial)                                                              | HUGO ID: 1027/UniProt ID: Q02338/                                                                                                                                 |
| 5152.7       | 5152           | PDE9A       | phosphodiesterase 9A                                                                                                | HUGO ID: 8795/UniProt ID: O76083/                                                                                                                                 |
| 51179.2      | 51179          | HAO2        | hydroxyacid oxidase 2 (long chain)                                                                                  | Aliases: HAOX2/HUGO ID: 4810/UniProt ID: Q9NYQ3/                                                                                                                  |
| 10195.3      | 10195          | ALG3        | asparagine-linked glycosylation 3 homolog (yeast, alpha-1,3-mannosyltransferase)                                    | Locus type: gene with protein product, function known or inferred/Aliases: NOT56L, Not56, CDGS4, D16Erd36e/HUGO ID: 23056/UniProt ID: Q92685/MGD ID: MGI:1098592/ |
| 10400.2      | 10400          | PEMT        | phosphatidylethanolamine N-methyltransferase                                                                        | Aliases: PEMPT, PEMT2/HUGO ID: 8830/UniProt ID: Q9UBM1/                                                                                                           |
| 178.5        | 178            | AGL         | amylo-1, 6-glucosidase, 4-alpha-glucanotransferase (glycogen debranching enzyme, glycogen storage disease type III) | Locus type: gene with protein product, function known or inferred/HUGO ID: 321/UniProt ID: P35573/MGD ID: MGI:1924809/                                            |
| 55350.2      | 55350          | VNN3        | vanin 3                                                                                                             | Locus type: gene with protein product, function known or inferred/Aliases: HSA238982/HUGO ID: 16431/UniProt ID: Q9NY84/                                           |
| 10476.2      | 10476          | ATP5H       | ATP synthase, H+ transporting, mitochondrial F0 complex, subunit d                                                  | Locus type: gene with protein product, function known or inferred/Aliases: ATPQ, ATP5JD/HUGO ID: 845/UniProt ID: O75947/MGD ID: MGI:1918929/                      |
| 26275.2      | 26275          | HIBCH       | 3-hydroxyisobutyryl-Coenzyme A hydrolase                                                                            | HUGO ID: 4908/UniProt ID: Q92931/                                                                                                                                 |
| 53905.2      | 53905          | DUOX1       | dual oxidase 1                                                                                                      | Aliases: NOXEF1, THOX1/HUGO ID: 3062/UniProt ID: Q9NRD9/                                                                                                          |
| 5152.19      | 5152           | PDE9A       | phosphodiesterase 9A                                                                                                | HUGO ID: 8795/UniProt ID: O76083/                                                                                                                                 |
| 6487.3       | 6487           | SIAT6       | sialyltransferase 6 (N-acetylglucosaminide alpha 2,3-sialyltransferase)                                             | Locus type: gene with protein product, function known or inferred/Aliases: ST3Gal III/HUGO ID: 10866/UniProt ID: Q11203/                                          |
| 51447.2      | 51447          | IHPK2       | inositol hexaphosphate kinase 2                                                                                     | Aliases: IP6K2/HUGO ID: 17313/UniProt ID: Q9H4P7/                                                                                                                 |
| 2629.4       | 2629           | GBA         | glucosidase, beta; acid (includes glucosylceramidase)                                                               | Aliases: GLUC, GBA1/HUGO ID: 4177/UniProt ID: P04062/                                                                                                             |
| 6487.6       | 6487           | SIAT6       | sialyltransferase 6 (N-acetylglucosaminide alpha 2,3-sialyltransferase)                                             | Locus type: gene with protein product, function known or inferred/Aliases: ST3Gal III/HUGO ID: 10866/UniProt ID: Q11203/                                          |
| 197257.2     | 197257         | LDHD        | lactate dehydrogenase D                                                                                             | Locus type: gene with protein product, function known or inferred/HUGO ID: 19708/UniProt ID: Q8IZK5/                                                              |
| 6508.2       | 6508           | SLC4A3      | solute carrier family 4, anion exchanger, member 3                                                                  | Aliases: AE3, SLC2C/HUGO ID: 11029/UniProt ID: P48751/                                                                                                            |
| 178.4        | 178            | AGL         | amylo-1, 6-glucosidase, 4-alpha-glucanotransferase (glycogen debranching enzyme, glycogen storage disease type III) | Locus type: gene with protein product, function known or inferred/HUGO ID: 321/UniProt ID: P35573/MGD ID: MGI:1924809/                                            |

| Abbreviation | Entrez Gene ID | Gene Symbol | Putative Function                                                                                                   | Additional notes                                                                                                                                                   |
|--------------|----------------|-------------|---------------------------------------------------------------------------------------------------------------------|--------------------------------------------------------------------------------------------------------------------------------------------------------------------|
| 8706.2       | 8706           | B3GALT3     | UDP-Gal:betaGlcNAc beta 1,3-galactosyltransferase, polypeptide 3                                                    | Locus type: gene with protein product, function known or inferred/Aliases: beta3Gal-T3, galT3, P1/HUGO ID: 918/UniProt ID: O75752/                                 |
| 51447.5      | 51447          | IHPK2       | inositol hexaphosphate kinase 2                                                                                     | Aliases: IP6K2/HUGO ID: 17313/UniProt ID: Q9H4P7/                                                                                                                  |
| 55568.2      | 55568          | GALNT10     | UDP-N-acetyl-alpha-D-galactosamine:polypeptide N-acetylgalactosaminyltransferase 10 (GalNAc-T10)                    | Locus type: gene with protein product, function known or inferred/Aliases: DKFZp586H0623/HUGO ID: 19873/UniProt ID: Q86SR1/                                        |
| 4843.2       | 4843           | NOS2A       | nitric oxide synthase 2A (inducible, hepatocytes)                                                                   | Locus type: gene with protein product, function known or inferred/Aliases: INOS, NOS, HEP-NOS/HUGO ID: 7873/UniProt ID: P35228/                                    |
| 2710.2       | 2710           | GK          | glycerol kinase                                                                                                     | Locus type: gene with protein product, function known or inferred/HUGO ID: 4289/UniProt ID: P32189/                                                                |
| 2348.2       | 2348           | FOLR1       | folate receptor 1 (adult)                                                                                           | HUGO ID: 3791/UniProt ID: P15328/                                                                                                                                  |
| 10195.2      | 10195          | ALG3        | asparagine-linked glycosylation 3 homolog (yeast, alpha-1,3-mannosyltransferase)                                    | Locus type: gene with protein product, function known or inferred/Aliases: NOT56L, Not56, CDGS4, D16ErtD36e/HUGO ID: 23056/UniProt ID: Q92685/MGD ID: MGI:1098592/ |
| 54344.2      | 54344          | DPM3        | dolichyl-phosphate mannosyltransferase polypeptide 3                                                                | Locus type: gene with protein product, function known or inferred/HUGO ID: 3007/UniProt ID: Q9P2X0/                                                                |
| 51292.3      | 51292          | GMPR2       | guanosine monophosphate reductase 2                                                                                 | Locus type: gene with protein product, function known or inferred/HUGO ID: 4377/UniProt ID: Q9P2T1/                                                                |
| 26289.2      | 26289          | AK5         | adenylate kinase 5                                                                                                  | HUGO ID: 365/UniProt ID: Q9Y6K8/                                                                                                                                   |
| 1103.4       | 1103           | CHAT        | choline acetyltransferase                                                                                           | Locus type: gene with protein product, function known or inferred/HUGO ID: 1912/UniProt ID: P28329/                                                                |
| 210.2        | 210            | ALAD        | aminolevulinate, delta-, dehydratase                                                                                | HUGO ID: 395/UniProt ID: P13716/                                                                                                                                   |
| 5295.2       | 5295           | PIK3R1      | phosphoinositide-3-kinase, regulatory subunit 1 (p85 alpha)                                                         | Locus type: gene with protein product, function known or inferred/Aliases: GRB1, p85-ALPHA/HUGO ID: 8979/UniProt ID: P27986/                                       |
| 5152.11      | 5152           | PDE9A       | phosphodiesterase 9A                                                                                                | HUGO ID: 8795/UniProt ID: O76083/                                                                                                                                  |
| 2948.3       | 2948           | GSTM4       | glutathione S-transferase M4                                                                                        | Locus type: gene with protein product, function known or inferred/HUGO ID: 4636/UniProt ID: Q03013/                                                                |
| 5151.3       | 5151           | PDE8A       | phosphodiesterase 8A                                                                                                | Locus type: gene with protein product, function known or inferred/Aliases: HST19550/HUGO ID: 8793/UniProt ID: O60658/                                              |
| 7296.2       | 7296           | TXNRD1      | thioredoxin reductase 1                                                                                             | Locus type: gene with protein product, function known or inferred/Aliases: TXNR/HUGO ID: 12437/UniProt ID: Q16881/                                                 |
| 4257.3       | 4257           | MGST1       | microsomal glutathione S-transferase 1                                                                              | Aliases: MGST-1/HUGO ID: 7061/UniProt ID: P10620/                                                                                                                  |
| 205.3        | 205            | AK3         | adenylate kinase 3                                                                                                  | Locus type: gene with protein product, function known or inferred/HUGO ID: 363/UniProt ID: P27144/                                                                 |
| 1312.2       | 1312           | COMT        | catechol-O-methyltransferase                                                                                        | HUGO ID: 2228/UniProt ID: P21964/                                                                                                                                  |
| 31.2         | 31             | ACACA       | acetyl-Coenzyme A carboxylase alpha                                                                                 | Aliases: ACC1/HUGO ID: 84/UniProt ID: Q13085/                                                                                                                      |
| 11343.2      | 11343          | MGLL        | monoglyceride lipase                                                                                                | Locus type: gene with protein product, function known or inferred/Aliases: H5K5, MGL/HUGO ID: 17038/UniProt ID: Q99685/                                            |
| 2876.2       | 2876           | GPX1        | glutathione peroxidase 1                                                                                            | HUGO ID: 4553/UniProt ID: P07203/                                                                                                                                  |
| 51022.2      | 51022          | GLRX2       | glutaredoxin 2                                                                                                      | Aliases: GRX2/HUGO ID: 16065/UniProt ID: Q96JC0/                                                                                                                   |
| 3290.2       | 3290           | HSD11B1     | hydroxysteroid (11-beta) dehydrogenase 1                                                                            | Locus type: gene with protein product, function known or inferred/HUGO ID: 5208/UniProt ID: P28845/                                                                |
| 5250.3       | 5250           | SLC25A3     | solute carrier family 25 (mitochondrial carrier; phosphate carrier), member 3                                       | Locus type: gene with protein product, function known or inferred/HUGO ID: 10989/UniProt ID: Q00325/                                                               |
| 1375.2       | 1375           | CPT1B       | carnitine palmitoyltransferase 1B (muscle)                                                                          | Aliases: M-CPT1, CPT1-M/HUGO ID: 2329/UniProt ID: Q92523/                                                                                                          |
| 9016.2       | 9016           | SLC25A14    | solute carrier family 25 (mitochondrial carrier, brain), member 14                                                  | Locus type: gene with protein product, function known or inferred/Aliases: BMC1, UCP5/HUGO ID: 10984/UniProt ID: O95258/                                           |
| 18.2         | 18             | ABAT        | 4-aminobutyrate aminotransferase                                                                                    | Aliases: GABAT/HUGO ID: 23/UniProt ID: P80404/                                                                                                                     |
| 79053.2      | 79053          | ALG8        | asparagine-linked glycosylation 8 homolog (yeast, alpha-1,3-glucosyltransferase)                                    | Locus type: gene with protein product, function known or inferred/Aliases: MGC2840/HUGO ID: 23161/UniProt ID: Q9BVK2/                                              |
| 1431.2       | 1431           | CS          | citrate synthase                                                                                                    | HUGO ID: 2422/UniProt ID: O75390/                                                                                                                                  |
| 10919.2      | 10919          | BAT8        | HLA-B associated transcript 8                                                                                       | Locus type: gene with protein product, function unknown/Aliases: G9A, Em:AF134726.3, HGNC:13942/HUGO ID: 14129/UniProt ID: Q96KQ7/                                 |
| 376497.2     | 376497         | SLC27A1     | solute carrier family 27 (fatty acid transporter), member 1                                                         | Locus type: gene with protein product, function known or inferred/Aliases: FATP1, FATP, MGC71751, FLJ00336/HUGO ID: 10995/UniProt ID: Q96DY3/MGD ID: MGI:1347098/  |
| 6582.2       | 6582           | SLC22A2     | solute carrier family 22 (organic cation transporter), member 2                                                     | Aliases: 38262/HUGO ID: 10966/UniProt ID: O15244/                                                                                                                  |
| 6470.2       | 6470           | SHMT1       | serine hydroxymethyltransferase 1 (soluble)                                                                         | HUGO ID: 10850/UniProt ID: P34896/                                                                                                                                 |
| 2182.2       | 2182           | ACSL4       | acyl-CoA synthetase long-chain family member 4                                                                      | Locus type: gene with protein product, function known or inferred/Aliases: ACS4, MRX63, LACS4/HUGO ID: 3571/UniProt ID: O60488/MGD ID: MGI:1354713/                |
| 2530.5       | 2530           | FUT8        | fucosyltransferase 8 (alpha (1,6) fucosyltransferase)                                                               | HUGO ID: 4019/UniProt ID: Q9BYC5/                                                                                                                                  |
| 51292.2      | 51292          | GMPR2       | guanosine monophosphate reductase 2                                                                                 | Locus type: gene with protein product, function known or inferred/HUGO ID: 4377/UniProt ID: Q9P2T1/                                                                |
| 178.3        | 178            | AGL         | amylo-1, 6-glucosidase, 4-alpha-glucanotransferase (glycogen debranching enzyme, glycogen storage disease type III) | Locus type: gene with protein product, function known or inferred/HUGO ID: 321/UniProt ID: P35573/MGD ID: MGI:1924809/                                             |
| 10400.3      | 10400          | PEMT        | phosphatidylethanolamine N-methyltransferase                                                                        | Aliases: PEMPT, PEMT2/HUGO ID: 8830/UniProt ID: Q9UBM1/                                                                                                            |
| 5152.12      | 5152           | PDE9A       | phosphodiesterase 9A                                                                                                | HUGO ID: 8795/UniProt ID: O76083/                                                                                                                                  |
| 4257.2       | 4257           | MGST1       | microsomal glutathione S-transferase 1                                                                              | Aliases: MGST-1/HUGO ID: 7061/UniProt ID: P10620/                                                                                                                  |
| 5244.2       | 5244           | ABCB4       | ATP-binding cassette, sub-family B (MDR/TAP), member 4                                                              | Locus type: gene with protein product, function known or inferred/Aliases: MDR2/3, PFIC-3/HUGO ID: 45/UniProt ID: P21439/                                          |

| Abbreviation | Entrez Gene ID | Gene Symbol | Putative Function                                                                                                     | Additional notes                                                                                                                                |
|--------------|----------------|-------------|-----------------------------------------------------------------------------------------------------------------------|-------------------------------------------------------------------------------------------------------------------------------------------------|
| 211.2        | 211            | ALAS1       | aminolevulinatase, delta-, synthase 1                                                                                 | HUGO ID: 396/UniProt ID: P13196/                                                                                                                |
| 2348.5       | 2348           | FOLR1       | folate receptor 1 (adult)                                                                                             | HUGO ID: 3791/UniProt ID: P15328/                                                                                                               |
| 5295.3       | 5295           | PIK3R1      | phosphoinositide-3-kinase, regulatory subunit 1 (p85 alpha)                                                           | Locus type: gene with protein product, function known or inferred/Aliases: GRB1, p85-ALPHA/HUGO ID: 8979/UniProt ID: P27986/                    |
| 8528.2       | 8528           | DDO         | D-aspartate oxidase                                                                                                   | Locus type: gene with protein product, function known or inferred/HUGO ID: 2727/UniProt ID: Q99489/                                             |
| 7296.3       | 7296           | TXNRD1      | thioredoxin reductase 1                                                                                               | Locus type: gene with protein product, function known or inferred/Aliases: TXNR/HUGO ID: 12437/UniProt ID: Q16881/                              |
| 31.3         | 31             | ACACA       | acetyl-Coenzyme A carboxylase alpha                                                                                   | Aliases: ACC1/HUGO ID: 84/UniProt ID: Q13085/                                                                                                   |
| 6487.5       | 6487           | SIAT6       | sialyltransferase 6 (N-acetylglucosaminidase alpha 2,3-sialyltransferase)                                             | Locus type: gene with protein product, function known or inferred/Aliases: ST3Gal III/HUGO ID: 10866/UniProt ID: Q11203/                        |
| 3098.2       | 3098           | HK1         | hexokinase 1                                                                                                          | Locus type: gene with protein product, function known or inferred/HUGO ID: 4922/UniProt ID: P19367/                                             |
| 56474.2      | 56474          | CTPS2       | CTP synthase II                                                                                                       | Locus type: gene with protein product, function known or inferred/HUGO ID: 2520/UniProt ID: Q9H809/                                             |
| 5152.20      | 5152           | PDE9A       | phosphodiesterase 9A                                                                                                  | HUGO ID: 8795/UniProt ID: O76083/                                                                                                               |
| 5281.2       | 5281           | PIGF        | phosphatidylinositol glycan, class F                                                                                  | HUGO ID: 8962/UniProt ID: Q07326/                                                                                                               |
| 52.3         | 52             | ACP1        | acid phosphatase 1, soluble                                                                                           | HUGO ID: 122/UniProt ID: P24666/                                                                                                                |
| 1375.3       | 1375           | CPT1B       | carnitine palmitoyltransferase 1B (muscle)                                                                            | Aliases: M-CPT1, CPT1-M/HUGO ID: 2329/UniProt ID: Q92523/                                                                                       |
| 123041.2     | 123041         | SLC24A4     | solute carrier family 24 (sodium/potassium/calcium exchanger), member 4                                               | Locus type: gene with protein product, function known or inferred/Aliases: NCKX4/HUGO ID: 10978/UniProt ID: Q8NFF2/                             |
| 51447.4      | 51447          | IHPK2       | inositol hexaphosphate kinase 2                                                                                       | Aliases: IP6K2/HUGO ID: 17313/UniProt ID: Q9H4P7/                                                                                               |
| 5151.5       | 5151           | PDE8A       | phosphodiesterase 8A                                                                                                  | Locus type: gene with protein product, function known or inferred/Aliases: HsT19550/HUGO ID: 8793/UniProt ID: O60658/                           |
| 2585.2       | 2585           | GALK2       | galactokinase 2                                                                                                       | Aliases: GK2/HUGO ID: 4119/UniProt ID: Q01415/                                                                                                  |
| 9154.2       | 9154           | SLC28A1     | solute carrier family 28 (sodium-coupled nucleoside transporter), member 1                                            | Aliases: CNT1/HUGO ID: 11001/UniProt ID: O00337/                                                                                                |
| 80142.4      | 80142          | PTGES2      | prostaglandin E synthase 2                                                                                            | Aliases: FLJ14038/HUGO ID: 17822/UniProt ID: Q9H7Z7/                                                                                            |
| 5152.13      | 5152           | PDE9A       | phosphodiesterase 9A                                                                                                  | HUGO ID: 8795/UniProt ID: O76083/                                                                                                               |
| 160851.2     | 160851         | DGKH        | diacylglycerol kinase, eta                                                                                            | Locus type: gene with protein product, function known or inferred/Aliases: DGKeta/HUGO ID: 2854/UniProt ID: Q9BX34/                             |
| 6487.8       | 6487           | SIAT6       | sialyltransferase 6 (N-acetylglucosaminidase alpha 2,3-sialyltransferase)                                             | Locus type: gene with protein product, function known or inferred/Aliases: ST3Gal III/HUGO ID: 10866/UniProt ID: Q11203/                        |
| 411.2        | 411            | ARSB        | arylsulfatase B                                                                                                       | HUGO ID: 714/UniProt ID: P15848/                                                                                                                |
| 3421.2       | 3421           | IDH3G       | isocitrate dehydrogenase 3 (NAD+) gamma                                                                               | HUGO ID: 5386/UniProt ID: P51553/                                                                                                               |
| 56894.2      | 56894          | AGPAT3      | 1-acylglycerol-3-phosphate O-acyltransferase 3                                                                        | Aliases: LPAAT-gamma/HUGO ID: 326/UniProt ID: Q9NRZ7/                                                                                           |
| 123041.3     | 123041         | SLC24A4     | solute carrier family 24 (sodium/potassium/calcium exchanger), member 4                                               | Locus type: gene with protein product, function known or inferred/Aliases: NCKX4/HUGO ID: 10978/UniProt ID: Q8NFF2/                             |
| 178.2        | 178            | AGL         | amylase-1, 6-glucosidase, 4-alpha-glucanotransferase (glycogen debranching enzyme, glycogen storage disease type III) | Locus type: gene with protein product, function known or inferred/HUGO ID: 321/UniProt ID: P35573/MGI:1924809/                                  |
| 5152.3       | 5152           | PDE9A       | phosphodiesterase 9A                                                                                                  | HUGO ID: 8795/UniProt ID: O76083/                                                                                                               |
| 1607.2       | 1607           | DGKB        | diacylglycerol kinase, beta 90kDa                                                                                     | Locus type: gene with protein product, function known or inferred/Aliases: KIAA0718, DGK, DGK-BETA/HUGO ID: 2850/UniProt ID: Q9Y6T7/            |
| 8611.2       | 8611           | PPAP2A      | phosphatidic acid phosphatase type 2A                                                                                 | Aliases: PAP-2a/HUGO ID: 9228/UniProt ID: O60463/                                                                                               |
| 516.2        | 516            | ATP5G1      | ATP synthase, H+ transporting, mitochondrial F0 complex, subunit c (subunit 9), isoform 1                             | HUGO ID: 841/UniProt ID: P05496/Variant 2: This variant differs in the 5' UTR, compared to variant 1. Variants 1 and 2 encode the same protein. |
| 513.2        | 513            | ATP5D       | ATP synthase, H+ transporting, mitochondrial F1 complex, delta subunit                                                | HUGO ID: 837/UniProt ID: P30049/                                                                                                                |
| 55902.2      | 55902          | ACAS2       | acetyl-Coenzyme A synthetase 2 (ADP forming)                                                                          | Aliases: LOC55902, ACS, dJ1161H23.1/HUGO ID: 15814/UniProt ID: Q9NR19/                                                                          |
| 2348.4       | 2348           | FOLR1       | folate receptor 1 (adult)                                                                                             | HUGO ID: 3791/UniProt ID: P15328/                                                                                                               |
| 2629.2       | 2629           | GBA         | glucosidase, beta; acid (includes glucosylceramidase)                                                                 | Aliases: GLUC, GBA1/HUGO ID: 4177/UniProt ID: P04062/                                                                                           |
| 1588.2       | 1588           | CYP19A1     | cytochrome P450, family 19, subfamily A, polypeptide 1                                                                | Locus type: gene with protein product, function known or inferred/Aliases: ARO, P-450AROM, CPV1, ARO1, CYAR/HUGO ID: 2594/UniProt ID: P11511/   |
| 10317.4      | 10317          | B3GALT5     | UDP-Gal:betaGlcNAc beta 1,3-galactosyltransferase, polypeptide 5                                                      | Aliases: beta3Gal-T5/HUGO ID: 920/UniProt ID: Q9Y2C3/                                                                                           |
| 1375.4       | 1375           | CPT1B       | carnitine palmitoyltransferase 1B (muscle)                                                                            | Aliases: M-CPT1, CPT1-M/HUGO ID: 2329/UniProt ID: Q92523/                                                                                       |
| 8854.3       | 8854           | ALDH1A2     | aldehyde dehydrogenase 1 family, member A2                                                                            | Locus type: gene with protein product, function known or inferred/Aliases: RALDH2/HUGO ID: 15472/UniProt ID: O94788/                            |
| 1103.2       | 1103           | CHAT        | choline acetyltransferase                                                                                             | Locus type: gene with protein product, function known or inferred/HUGO ID: 1912/UniProt ID: P28329/                                             |
| 3423.2       | 3423           | IDS         | iduronate 2-sulfatase (Hunter syndrome)                                                                               | HUGO ID: 5389/UniProt ID: P22304/                                                                                                               |
| 1384.2       | 1384           | CRAT        | carnitine acetyltransferase                                                                                           | Aliases: CAT1/HUGO ID: 2342/UniProt ID: P43155/                                                                                                 |
| 594.2        | 594            | BCKDHB      | branched chain keto acid dehydrogenase E1, beta polypeptide (maple syrup urine disease)                               | Locus type: gene with protein product, function known or inferred/HUGO ID: 987/UniProt ID: P21953/                                              |
| 31.4         | 31             | ACACA       | acetyl-Coenzyme A carboxylase alpha                                                                                   | Aliases: ACC1/HUGO ID: 84/UniProt ID: Q13085/                                                                                                   |
| 8854.2       | 8854           | ALDH1A2     | aldehyde dehydrogenase 1 family, member A2                                                                            | Locus type: gene with protein product, function known or inferred/Aliases: RALDH2/HUGO ID: 15472/UniProt ID: O94788/                            |
| 85365.2      | 85365          | ALG2        | asparagine-linked glycosylation 2 homolog (yeast, alpha-1,3-mannosyltransferase)                                      | Locus type: gene with protein product, function known or inferred/Aliases: CDHG, FLJ14511, hALPG2/HUGO ID: 23159/UniProt ID: Q8NBX2/            |
| 6480.3       | 6480           | SIAT1       | sialyltransferase 1 (beta-galactoside alpha-2,6-sialyltransferase)                                                    | Aliases: CD75, ST6Gal I/HUGO ID: 10860/UniProt ID: P15907/                                                                                      |

| Abbreviation | Entrez Gene ID | Gene Symbol | Putative Function                                                                                                          | Additional notes                                                                                                                               |
|--------------|----------------|-------------|----------------------------------------------------------------------------------------------------------------------------|------------------------------------------------------------------------------------------------------------------------------------------------|
| 514.2        | 514            | ATP5E       | ATP synthase, H+ transporting, mitochondrial F1 complex, epsilon subunit                                                   | HUGO ID: 838/UniProt ID: P56381/                                                                                                               |
| 6573.2       | 6573           | SLC19A1     | solute carrier family 19 (folate transporter), member 1                                                                    | Aliases: FOLT/HUGO ID: 10937/UniProt ID: P41440/                                                                                               |
| 5352.2       | 5352           | PLOD2       | procollagen-lysine, 2-oxoglutarate 5-dioxygenase (lysine hydroxylase) 2                                                    | Locus type: gene with protein product, function known or inferred/HUGO ID: 9082/UniProt ID: O00469/                                            |
| 271.2        | 271            | AMPD2       | adenosine monophosphate deaminase 2 (isoform L)                                                                            | HUGO ID: 469/UniProt ID: Q01433/                                                                                                               |
| 3420.3       | 3420           | IDH3B       | isocitrate dehydrogenase 3 (NAD+) beta                                                                                     | HUGO ID: 5385/UniProt ID: O43837/                                                                                                              |
| 55512.2      | 55512          | SMPD3       | sphingomyelin phosphodiesterase 3, neutral membrane (neutral sphingomyelinase II)                                          | Locus type: gene with protein product, function known or inferred/Aliases: NSMASE2/HUGO ID: 14240/UniProt ID: Q9NY59/                          |
| 5277.3       | 5277           | PIGA        | phosphatidylinositol glycan, class A (paroxysmal nocturnal hemoglobinuria)                                                 | Aliases: GPI3/HUGO ID: 8957/UniProt ID: P37287/                                                                                                |
| 2678.2       | 2678           | GGT1        | gamma-glutamyltransferase 1                                                                                                | Aliases: D22S672, D22S732, CD224/HUGO ID: 4250/UniProt ID: P19440/                                                                             |
| 27124.2      | 27124          | PIB5PA      | phosphatidylinositol (4,5) bisphosphate 5-phosphatase, A                                                                   | HUGO ID: 8956/UniProt ID: Q15735/                                                                                                              |
| 2571.2       | 2571           | GAD1        | glutamate decarboxylase 1 (brain, 67kDa)                                                                                   | HUGO ID: 4092/UniProt ID: Q99259/                                                                                                              |
| 5152.14      | 5152           | PDE9A       | phosphodiesterase 9A                                                                                                       | HUGO ID: 8795/UniProt ID: O76083/                                                                                                              |
| 6820.2       | 6820           | SULT2B1     | sulfotransferase family, cytosolic, 2B, member 1                                                                           | Aliases: HSST2/HUGO ID: 11459/UniProt ID: O00205/                                                                                              |
| 1798.2       | 1798           | DPAGT1      | dolichyl-phosphate (UDP-N-acetylglucosamine) N-acetylglucosaminophosphotransferase 1 (GlcNAc-1-P transferase)              | Aliases: GPT, D11S366, DGPT, ALG7, CDG-Ij/HUGO ID: 2995/UniProt ID: Q9H3H5/                                                                    |
| 112.2        | 112            | ADCY6       | adenylate cyclase 6                                                                                                        | HUGO ID: 237/UniProt ID: O43306/                                                                                                               |
| 51447.6      | 51447          | IHPK2       | inositol hexaphosphate kinase 2                                                                                            | Aliases: IP6K2/HUGO ID: 17313/UniProt ID: Q9H4P7/                                                                                              |
| 8706.3       | 8706           | B3GALT3     | UDP-Gal:betaGlcNAc beta 1,3-galactosyltransferase, polypeptide 3                                                           | Locus type: gene with protein product, function known or inferred/Aliases: beta3Gal-T3, galT3, P1/HUGO ID: 918/UniProt ID: O75752/             |
| 6487.7       | 6487           | SIAT6       | sialyltransferase 6 (N-acetylglucosaminide alpha 2,3-sialyltransferase)                                                    | Locus type: gene with protein product, function known or inferred/Aliases: ST3Gal III/HUGO ID: 10866/UniProt ID: Q11203/                       |
| 5250.4       | 5250           | SLC25A3     | solute carrier family 25 (mitochondrial carrier; phosphate carrier), member 3                                              | Locus type: gene with protein product, function known or inferred/HUGO ID: 10989/UniProt ID: Q00325/                                           |
| 9807.2       | 9807           | IHPK1       | inositol hexaphosphate kinase 1                                                                                            | Locus type: gene with protein product, function known or inferred/Aliases: KIAA0263, IP6K1/HUGO ID: 18360/UniProt ID: Q92551/                  |
| 8525.3       | 8525           | DGKZ        | diacylglycerol kinase, zeta 104kDa                                                                                         | Aliases: DAGK5, hDGKzeta/HUGO ID: 2857/UniProt ID: Q13574/                                                                                     |
| 4056.2       | 4056           | LTC4S       | leukotriene C4 synthase                                                                                                    | Locus type: gene with protein product, function known or inferred/Aliases: MGC33147/HUGO ID: 6719/UniProt ID: Q16873/                          |
| 771.2        | 771            | CA12        | carbonic anhydrase XII                                                                                                     | Locus type: gene with protein product, function known or inferred/Aliases: HST18816/HUGO ID: 1371/UniProt ID: O43570/                          |
| 7360.2       | 7360           | UGP2        | UDP-glucose pyrophosphorylase 2                                                                                            | HUGO ID: 12527/UniProt ID: Q16851/                                                                                                             |
| 440.2        | 440            | ASNS        | asparagine synthetase                                                                                                      | Locus type: gene with protein product, function known or inferred/HUGO ID: 753/UniProt ID: P08243/                                             |
| 1103.3       | 1103           | CHAT        | choline acetyltransferase                                                                                                  | Locus type: gene with protein product, function known or inferred/HUGO ID: 1912/UniProt ID: P28329/                                            |
| 3795.2       | 3795           | KHK         | ketohexokinase (fructokinase)                                                                                              | HUGO ID: 6315/UniProt ID: P50053/                                                                                                              |
| 5091.2       | 5091           | PC          | pyruvate carboxylase                                                                                                       | Aliases: PCB/HUGO ID: 8636/UniProt ID: P11498/                                                                                                 |
| 1716.2       | 1716           | DGUOK       | deoxyguanosine kinase                                                                                                      | Aliases: dGK/HUGO ID: 2858/UniProt ID: Q16854/                                                                                                 |
| 10861.2      | 10861          | SLC26A1     | solute carrier family 26 (sulfate transporter), member 1                                                                   | Locus type: gene with protein product, function known or inferred/Aliases: SAT-1, EDM4/HUGO ID: 10993/UniProt ID: Q9H2B4/                      |
| 10317.5      | 10317          | B3GALT5     | UDP-Gal:betaGlcNAc beta 1,3-galactosyltransferase, polypeptide 5                                                           | Aliases: beta3Gal-T5/HUGO ID: 920/UniProt ID: Q9Y2C3/                                                                                          |
| 2348.6       | 2348           | FOLR1       | folate receptor 1 (adult)                                                                                                  | HUGO ID: 3791/UniProt ID: P15328/                                                                                                              |
| 2181.2       | 2181           | ACSL3       | acyl-CoA synthetase long-chain family member 3                                                                             | Locus type: gene with protein product, function known or inferred/Aliases: ACS3, PRO2194/HUGO ID: 3570/UniProt ID: O95573/MGD ID: MGI:1921455/ |
| 31.5         | 31             | ACACA       | acetyl-Coenzyme A carboxylase alpha                                                                                        | Aliases: ACC1/HUGO ID: 84/UniProt ID: Q13085/                                                                                                  |
| 271.3        | 271            | AMPD2       | adenosine monophosphate deaminase 2 (isoform L)                                                                            | HUGO ID: 469/UniProt ID: Q01433/                                                                                                               |
| 23600.2      | 23600          | AMACR       | alpha-methylacyl-CoA racemase                                                                                              | Aliases: RACE/HUGO ID: 451/UniProt ID: Q9UHK6/                                                                                                 |
| 1384.3       | 1384           | CROT        | carnitine acetyltransferase                                                                                                | Aliases: CAT1/HUGO ID: 2342/UniProt ID: P43155/                                                                                                |
| 4830.2       | 4830           | NME1        | non-metastatic cells 1, protein (NM23A) expressed in                                                                       | Aliases: NM23, NM23-H1/HUGO ID: 7849/UniProt ID: P15531/                                                                                       |
| 5151.4       | 5151           | PDE8A       | phosphodiesterase 8A                                                                                                       | Locus type: gene with protein product, function known or inferred/Aliases: HST19550/HUGO ID: 8793/UniProt ID: O60658/                          |
| 2618.2       | 2618           | GART        | phosphoribosylglycinamide formyltransferase, phosphoribosylglycinamide synthetase, phosphoribosylaminoimidazole synthetase | HUGO ID: 4163/UniProt ID: P22102/                                                                                                              |
| 7173.3       | 7173           | TPO         | thyroid peroxidase                                                                                                         | HUGO ID: 12015/UniProt ID: P07202/                                                                                                             |
| 221823.2     | 221823         | PRPS1L1     | phosphoribosyl pyrophosphate synthetase 1-like 1                                                                           | Locus type: gene with protein product, function known or inferred/Aliases: PRPS3/HUGO ID: 9463/UniProt ID: P21108/                             |
| 205.2        | 205            | AK3         | adenylate kinase 3                                                                                                         | Locus type: gene with protein product, function known or inferred/HUGO ID: 363/UniProt ID: P27144/                                             |
| 954.2        | 954            | ENTPD2      | ectonucleoside triphosphate diphosphohydrolase 2                                                                           | Aliases: NTPDase-2/HUGO ID: 3364/UniProt ID: Q9Y5L3/                                                                                           |
| 534.2        | 534            | ATP6V1G2    | ATPase, H+ transporting, lysosomal 13kDa, V1 subunit G isoform 2                                                           | Aliases: Vma10, NG38, Em:AC004181.3/HUGO ID: 862/UniProt ID: O95670/                                                                           |
| 6547.6       | 6547           | SLC8A3      | solute carrier family 8 (sodium-calcium exchanger), member 3                                                               | Aliases: NCX3/HUGO ID: 11070/UniProt ID: P57103/                                                                                               |

| Abbreviation | Entrez Gene ID | Gene Symbol | Putative Function                                                                 | Additional notes                                                                                                                                                                                                     |
|--------------|----------------|-------------|-----------------------------------------------------------------------------------|----------------------------------------------------------------------------------------------------------------------------------------------------------------------------------------------------------------------|
| 27087.2      | 27087          | B3GAT1      | beta-1,3-glucuronyltransferase 1 (glucuronosyltransferase P)                      | Locus type: gene with protein product, function known or inferred/Aliases: GlcAT-P/HUGO ID: 921/UniProt ID: Q9P2W7/                                                                                                  |
| 131669.1     | 131669         | FLJ31300    | urocanate hydratase                                                               | transcript: NM_144639                                                                                                                                                                                                |
| 10841.2      | 10841          | FTCD        | formiminotransferase cyclodeaminase                                               |                                                                                                                                                                                                                      |
| 314.2        | 314            | AOC2        | amine oxidase, copper containing 2 (retina-specific)                              |                                                                                                                                                                                                                      |
| 27165.2      | 27165          | GA          | liver mitochondrial glutaminase                                                   |                                                                                                                                                                                                                      |
| 84735.1      | 84735          | CNDP1       | carnosine dipeptidase 1 (metallopeptidase M20 family)                             |                                                                                                                                                                                                                      |
| 7915.2       | 7915           | ALDH5A1     | aldehyde dehydrogenase 5 family, member A1 (succinate-semialdehyde dehydrogenase) |                                                                                                                                                                                                                      |
| 55191.1      | 55191          | NADSYN1     | NAD synthetase 1 (glutamine-dependent)                                            | transcript: NM_018161                                                                                                                                                                                                |
| 1373.2       | 1373           | CPS1        | carbamoyl-phosphate synthetase 1, mitochondrial                                   | transcript: NM_001875                                                                                                                                                                                                |
| 2954.2       | 2954           | GSTZ1       | glutathione transferase zeta 1 (maleylacetoacetate isomerase)                     |                                                                                                                                                                                                                      |
| 2954.3       | 2954           | GSTZ1       | glutathione transferase zeta 1 (maleylacetoacetate isomerase)                     |                                                                                                                                                                                                                      |
| 158.2        | 158            | ADSL        | adenylosuccinate lyase                                                            | transcript: NM_000026                                                                                                                                                                                                |
| 445.2        | 445            | ASS         | argininosuccinate synthetase                                                      |                                                                                                                                                                                                                      |
| 80347.1      | 80347          | KDTB/COAE   | Phosphopantetheine adenylyltransferase/dephospho-CoA kinase                       |                                                                                                                                                                                                                      |
| 60490.1      | 60490          | PPDC        | Phosphopantothienylcysteine decarboxylase                                         |                                                                                                                                                                                                                      |
| 2645.2       | 2645           | GCK         | glucokinase (hexokinase 4, maturity onset diabetes of the young 2)                | transcript: NM_033507                                                                                                                                                                                                |
| 79717.1      | 79717          | PPCS        | Phosphopantothene-cysteine ligase                                                 | transcript: NM_024664                                                                                                                                                                                                |
| 80025.1      | 80025          | PANK2       | Pantothenate kinase 2                                                             |                                                                                                                                                                                                                      |
| 80025.2      | 80025          | PANK2       | Pantothenate kinase 2                                                             |                                                                                                                                                                                                                      |
| 80025.3      | 80025          | PANK2       | Pantothenate kinase 2                                                             |                                                                                                                                                                                                                      |
| 80025.4      | 80025          | PANK2       | Pantothenate kinase 2                                                             |                                                                                                                                                                                                                      |
| 80025.5      | 80025          | PANK2       | Pantothenate kinase 2                                                             |                                                                                                                                                                                                                      |
| 8884.1       | 8884           | SMVT        | sodium-dependent vitamin transporter                                              |                                                                                                                                                                                                                      |
| 10560.1      | 10560          | SLC19A2     | thiamine transporter                                                              |                                                                                                                                                                                                                      |
| 286016.1     | 286016         | LOC286016   | hypothetical protein LOC286016                                                    | transcript: NR_002187                                                                                                                                                                                                |
| 55293.1      | 55293          | UEV3        | ubiquitin-conjugating enzyme E2-like                                              | transcript: NM_018314                                                                                                                                                                                                |
| 2639.2       | 2639           | GCDH        | glutaryl-Coenzyme A dehydrogenase                                                 |                                                                                                                                                                                                                      |
| 51166.1      | 51166          | AADAT       | aminoadipate aminotransferase                                                     |                                                                                                                                                                                                                      |
| 51166.2      | 51166          | AADAT       | aminoadipate aminotransferase                                                     |                                                                                                                                                                                                                      |
| 97.2         | 97             | ACYP1       | acylphosphatase 1, erythrocyte (common) type                                      |                                                                                                                                                                                                                      |
| 55312.1      | 55312          | RFK         | Riboflavin kinase                                                                 |                                                                                                                                                                                                                      |
| 80308.1      | 80308          | FADS        | FAD-synthetase                                                                    | transcript: NM_025207                                                                                                                                                                                                |
| 80308.2      | 80308          | FADS        | FAD-synthetase                                                                    | transcript: NM_201398                                                                                                                                                                                                |
| 10327.2      | 10327          | AKR1A1      | aldo-keto reductase family 1, member iA (aldehyde reductase)                      |                                                                                                                                                                                                                      |
| 522.2        | 522            | ATP5J       | ATP synthase, H+ transporting, mitochondrial F0 complex, subunit F6               | Variant 2                                                                                                                                                                                                            |
| 522.3        | 522            | ATP5J       | ATP synthase, H+ transporting, mitochondrial F0 complex, subunit F6               | Variant 3                                                                                                                                                                                                            |
| 522.4        | 522            | ATP5J       | ATP synthase, H+ transporting, mitochondrial F0 complex, subunit F6               | Variant 4: This variant (4) differs in the 5' UTR, compared to variant 1. Variants 1, 2, 3 and 4 encode the same isoform (a).                                                                                        |
| 509.2        | 509            | ATP5C1      | ATP synthase, H+ transporting, mitochondrial F1 complex, gamma polypeptide 1      | Variant 2: This variant lacks a segment in the coding region compared to variant 1. The resulting isoform (H), also known as a heart type isoform, contains a shorter and distinct C-terminus compared to isoform L. |
| 4967.2       | 4967           | OGDH        | oxoglutarate (alpha-ketoglutarate) dehydrogenase (lipoamide)                      | transcript: NM_002541                                                                                                                                                                                                |
| 27349.1      | 27349          | MT          | malonyl-CoA:acyl carrier protein transacylase, mitochondrial                      | transcript: NM_173467                                                                                                                                                                                                |
| 27349.2      | 27349          | MT          | malonyl-CoA:acyl carrier protein transacylase, mitochondrial                      | transcript: NM_014507                                                                                                                                                                                                |
| 29968.2      | 29968          | PSAT1       | phosphoserine aminotransferase 1                                                  |                                                                                                                                                                                                                      |
| 50617.2      | 50617          | ATP6V0A4    | ATPase, H+ transporting, lysosomal V0 subunit a isoform 4                         |                                                                                                                                                                                                                      |
| 50617.3      | 50617          | ATP6V0A4    | ATPase, H+ transporting, lysosomal V0 subunit a isoform 4                         |                                                                                                                                                                                                                      |
| 51606.2      | 51606          | ATP6V1H     | ATPase, H+ transporting, lysosomal 50/57kDa, V1 subunit H isoform 1               |                                                                                                                                                                                                                      |
| 51606.3      | 51606          | ATP6V1H     | ATPase, H+ transporting, lysosomal 50/57kDa, V1 subunit H isoform 2               |                                                                                                                                                                                                                      |
| 23057.1      | 23057          | NMNAT2      | Nicotinamide nucleotide adenylyltransferase 2                                     |                                                                                                                                                                                                                      |
| 23057.2      | 23057          | NMNAT2      | Nicotinamide nucleotide adenylyltransferase 2                                     |                                                                                                                                                                                                                      |
| 8704.2       | 8704           | B4GALT2     | UDP-Gal:betaGlcNAc beta 1,4- galactosyltransferase, polypeptide 2                 | transcript: NM_003780                                                                                                                                                                                                |
| 64802.1      | 64802          | NMNAT1      | Nicotinamide nucleotide adenylyltransferase 1                                     |                                                                                                                                                                                                                      |
| 79053.3      | 79053          | ALG8        | asparagine-linked glycosylation 8 homolog (yeast, alpha-1,3-glucosyltransferase)  | transcript: NM_001007027                                                                                                                                                                                             |
| 6482.2       | 6482           | SIAT4A      | sialyltransferase 4A (beta-galactoside alpha-2,3-sialyltransferase)               | transcript: NM_173344                                                                                                                                                                                                |
| 29796.2      | 29796          | HSPC051     | ubiquinol-cytochrome c reductase complex                                          |                                                                                                                                                                                                                      |
| 125965.1     | 125965         | COX6B2      | cytochrome c oxidase subunit VIb polypeptide 2 (testis)                           |                                                                                                                                                                                                                      |

| Abbreviation | Entrez Gene ID | Gene Symbol | Putative Function                                                                               | Additional notes                              |
|--------------|----------------|-------------|-------------------------------------------------------------------------------------------------|-----------------------------------------------|
| 170712.1     | 170712         | COX7B2      | cytochrome c oxidase subunit VIIb2                                                              |                                               |
| 134526.1     | 134526         | CACH1       | cytosolic acetyl-CoA hydrolase                                                                  | transcript: NM_130767                         |
| 124637.1     | 124637         | FLJ32499    | hypothetical protein FLJ32499                                                                   | transcript: NM_144607                         |
| 162417.1     | 162417         | NAGS        | N-acetylglutamate synthase                                                                      |                                               |
| 2593.2       | 2593           | GAMT        | guanidinoacetate N-methyltransferase                                                            |                                               |
| 29925.2      | 29925          | GMPPB       | GDP-mannose pyrophosphorylase B                                                                 | transcript: NM_021971                         |
| 29926.2      | 29926          | GMPPA       | GDP-mannose pyrophosphorylase A                                                                 | transcript: NM_205847                         |
| 7264.1       | 7264           | TSTA3       | tissue specific transplantation antigen P35B                                                    | transcript: NM_003313                         |
| 197258.1     | 197258         | FUK         | fucokinase                                                                                      | transcript: NM_145059                         |
| 2645.3       | 2645           | GCK         | glucokinase (hexokinase 4, maturity onset diabetes of the young 2)                              | transcript: NM_033508                         |
| 4712.2       | 4712           | NDUFB6      | NADH dehydrogenase (ubiquinone) 1 beta subcomplex, 6, 17kDa                                     |                                               |
| 7991.1       | 7991           | TUSC3       | tumor suppressor candidate 3                                                                    |                                               |
| 7991.2       | 7991           | TUSC3       | tumor suppressor candidate 3                                                                    |                                               |
| 8309.1       | 8309           | ACOX2       | acyl-Coenzyme A oxidase 2, branched chain                                                       |                                               |
| 113451.1     | 113451         | ODC-p       | ornithine decarboxylase-like                                                                    | transcript: NM_052998                         |
| 1809.1       | 1809           | DPYSL3      | dihydropyrimidinase-like 3                                                                      |                                               |
| 7108.1       | 7108           | TM7SF2      | transmembrane 7 superfamily member 2                                                            |                                               |
| 6307.1       | 6307           | SC4MOL      | sterol-C4-methyl oxidase-like                                                                   |                                               |
| 1119.2       | 1119           | CHK         | choline kinase                                                                                  |                                               |
| 1120.2       | 1120           | CHKL        | choline/ethanolamine kinase                                                                     |                                               |
| 8760.1       | 8760           | CDS2        | CDP-diacylglycerol synthase (phosphatidate cytidyltransferase) 2                                |                                               |
| 9489.1       | 9489           | PGS1        | phosphatidylglycerophosphate synthase                                                           |                                               |
| 5136.2       | 5136           | PDE1A       | phosphodiesterase 1A, calmodulin-dependent                                                      |                                               |
| 27430.1      | 27430          | MAT2B       | methionine adenosyltransferase II, beta                                                         |                                               |
| 27430.2      | 27430          | MAT2B       | methionine adenosyltransferase II, beta                                                         |                                               |
| 23382.1      | 23382          | AHCYL2      | S-adenosylhomocysteine hydrolase-like 2                                                         |                                               |
| 5150.1       | 5150           | PDE7A       | phosphodiesterase 7A isoform a                                                                  |                                               |
| 5150.2       | 5150           | PDE7A       | phosphodiesterase 7A isoform b                                                                  |                                               |
| 80162.1      | 80162          | FLJ22635    | hypothetical protein FLJ22635                                                                   |                                               |
| 9536.1       | 9536           | PTGES       | prostaglandin E synthase                                                                        |                                               |
| 9536.2       | 9536           | PTGES       | prostaglandin E synthase                                                                        |                                               |
| 2542.1       | 2542           | SLC37A4     | solute carrier family 37 (glycerol-6-phosphate transporter), member 4                           | transcript: NM_001467                         |
| 7352.2       | 7352           | UCP3        | uncoupling protein 3 (mitochondrial, proton carrier)                                            |                                               |
| 318.2        | 318            | NUDT2       | nucleoside diphosphatase                                                                        |                                               |
| 318.3        | 318            | NUDT2       | nucleoside diphosphatase                                                                        |                                               |
| 57818.1      | 57818          | G6PC2       | glucose-6-phosphatase, catalytic, 2                                                             | transcript: NM_021176                         |
| 83549.1      | 83549          | UCK1        | uridine-cytidine kinase 1                                                                       |                                               |
| 7378.2       | 7378           | UPP1        | uridine phosphorylase 1                                                                         |                                               |
| 10587.2      | 10587          | TXNRD2      | thioredoxin reductase 2                                                                         |                                               |
| 10587.3      | 10587          | TXNRD2      | thioredoxin reductase 2                                                                         |                                               |
| 5625.1       | 5625           | PRODH       | proline dehydrogenase (oxidase) 1                                                               | aliases: PIG6; HSPOX2; PRODH1; PRODH2; TP5316 |
| 8974.1       | 8974           | P4HA2       | procollagen-proline, 2-oxoglutarate 4-dioxygenase (proline 4-hydroxylase), alpha polypeptide II |                                               |
| 1789.1       | 1789           | DNMT3B      | DNA (cytosine-5-)-methyltransferase 3 beta                                                      |                                               |
| 1789.2       | 1789           | DNMT3B      | DNA (cytosine-5-)-methyltransferase 3 beta                                                      |                                               |
| 1789.3       | 1789           | DNMT3B      | DNA (cytosine-5-)-methyltransferase 3 beta                                                      |                                               |
| 1789.4       | 1789           | DNMT3B      | DNA (cytosine-5-)-methyltransferase 3 beta                                                      |                                               |
| 1788.1       | 1788           | DNMT3A      | DNA (cytosine-5-)-methyltransferase 3                                                           |                                               |
| 1788.2       | 1788           | DNMT3A      | DNA (cytosine-5-)-methyltransferase 3                                                           |                                               |
| 1788.3       | 1788           | DNMT3A      | DNA (cytosine-5-)-methyltransferase 3                                                           |                                               |
| 1788.4       | 1788           | DNMT3A      | DNA (cytosine-5-)-methyltransferase 3                                                           |                                               |
| 1787.1       | 1787           | DNMT2       | DNA (cytosine-5-)-methyltransferase 2                                                           |                                               |
| 1787.2       | 1787           | DNMT2       | DNA (cytosine-5-)-methyltransferase 2                                                           |                                               |
| 1787.3       | 1787           | DNMT2       | DNA (cytosine-5-)-methyltransferase 2                                                           |                                               |
| 1787.4       | 1787           | DNMT2       | DNA (cytosine-5-)-methyltransferase 2                                                           |                                               |
| 1787.5       | 1787           | DNMT2       | DNA (cytosine-5-)-methyltransferase 2                                                           |                                               |
| 1787.6       | 1787           | DNMT2       | DNA (cytosine-5-)-methyltransferase 2                                                           |                                               |
| 6319.1       | 6319           | SCD         | stearoyl-CoA desaturase (delta-9-desaturase)                                                    |                                               |
| 64064.1      | 64064          | OXCT2       | 3-oxoacid CoA transferase 2                                                                     |                                               |
| 54511.1      | 54511          | HMGCLL1     | 3-hydroxymethyl-3-methylglutaryl-Coenzyme A lyase-like 1                                        |                                               |
| 957.1        | 957            | ENTPD5      | ectonucleoside triphosphate diphosphohydrolase 5                                                |                                               |
| 23530.2      | 23530          | NNT         | Nicotinamide nucleotide transhydrogenase                                                        |                                               |
| 27235.1      | 27235          | COQ2        | para-hydroxybenzoate - polyprenyltransferase, mitochondrial                                     | transcript: NM_015697                         |
| 25902.1      | 25902          | MTHFD1L     | methylenetetrahydrofolate dehydrogenase (NADP+ dependent) 1-like                                | transcript: NM_015440                         |
| 286297.1     | 286297         | LOC286297   | hypothetical protein LOC286297                                                                  | transcript: XM_372099                         |
| 80068.1      | 80068          | FLJ13105    | hypothetical protein FLJ13105                                                                   | transcript: NM_001004346                      |
| 285216.1     | 285216         | LOC285216   | hypothetical protein LOC285216                                                                  | transcript: XM_496652                         |
| 10390.1      | 10390          | CEPT1       | choline/ethanolamine phosphotransferase 1                                                       |                                               |

| Abbreviation | Entrez Gene ID | Gene Symbol | Putative Function                                                                                             | Additional notes         |
|--------------|----------------|-------------|---------------------------------------------------------------------------------------------------------------|--------------------------|
| 51005.1      | 51005          | CGI-14      | CGI-14 protein                                                                                                | transcript: NM_015944    |
| 27159.1      | 27159          | CHIA        | eosinophil chemotactic cytokine                                                                               | transcript: NM_021797    |
| 27159.2      | 27159          | CHIA        | eosinophil chemotactic cytokine                                                                               | transcript: NM_201653    |
| 54682.1      | 54682          | MANSC1      | MANSC domain containing 1                                                                                     | transcript: NM_018050    |
| 1118.1       | 1118           | CHIT1       | chitinase 1 (chitotriosidase)                                                                                 | transcript: NM_003465    |
| 200576.1     | 200576         | PIP5K3      | phosphatidylinositol-3-phosphate/phosphatidylinositol 5-kinase, type III                                      |                          |
| 200576.2     | 200576         | PIP5K3      | phosphatidylinositol-3-phosphate/phosphatidylinositol 5-kinase, type III                                      |                          |
| 200576.3     | 200576         | PIP5K3      | phosphatidylinositol-3-phosphate/phosphatidylinositol 5-kinase, type III                                      |                          |
| 5298.1       | 5298           | PIK4CB      | phosphatidylinositol 4-kinase, catalytic, beta polypeptide                                                    |                          |
| 55361.1      | 55361          | PI4KII      | phosphatidylinositol 4-kinase type II                                                                         | transcript: NM_018425    |
| 55268.1      | 55268          | ECHDC2      | enoyl Coenzyme A hydratase domain containing 2                                                                | transcript: NM_018281    |
| 8395.1       | 8395           | PIP5K1B     | phosphatidylinositol-4-phosphate 5-kinase, type I, beta                                                       | transcript: NM_003558    |
| 8396.2       | 8396           | PIP5K2B     | phosphatidylinositol-4-phosphate 5-kinase, type II, beta                                                      | transcript: NM_138687    |
| 8867.2       | 8867           | SYNJ1       | synaptojanin 1                                                                                                | transcript: NM_203446    |
| 290.1        | 290            | ANPEP       | alanyl (membrane) aminopeptidase                                                                              |                          |
| 10870.1      | 10870          | HCST        | hematopoietic cell signal transducer                                                                          | transcript: NM_001007469 |
| 29124.1      | 29124          | LGALS13     | lectin, galactoside-binding, soluble, 13 (galectin 13)                                                        |                          |
| 8560.1       | 8560           | DEGS1       | degenerative spermatocyte homolog 1, lipid desaturase (Drosophila)                                            | transcript: NM_003676    |
| 8560.2       | 8560           | DEGS1       | degenerative spermatocyte homolog 1, lipid desaturase (Drosophila)                                            | transcript: NM_144780    |
| 55163.1      | 55163          | PNPO        | Pyridoxine-5'-phosphate oxidase                                                                               |                          |
| 3631.2       | 3631           | INPP4A      | inositol polyphosphate-4-phosphatase, type I, 107kDa                                                          | transcript: NM_004027    |
| 57026.1      | 57026          | PDXP        | Pyridoxal Phosphatase                                                                                         |                          |
| 253430.1     | 253430         | IPMK        | inositol polyphosphate multikinase                                                                            | transcript: NM_152230    |
| 51109.1      | 51109          | RDH11       | retinol dehydrogenase 11 (all-trans and 9-cis)                                                                |                          |
| 195814.1     | 195814         | RDHE2       | epidermal retinal dehydrogenase 2                                                                             | transcript: NM_138969    |
| 84812.1      | 84812          | PLCD4       | phospholipase C, delta 4                                                                                      | transcript: NM_032726    |
| 23007.1      | 23007          | PLCL3       | phospholipase C-like 3                                                                                        | transcript: NM_014996    |
| 51196.1      | 51196          | PLCE1       | phospholipase C, epsilon 1                                                                                    | transcript: NM_016341    |
| 23236.2      | 23236          | PLCB1       | phospholipase C, beta 1 (phosphoinositide-specific)                                                           | transcript: NM_182734    |
| 113026.1     | 113026         | PLCD3       | phospholipase C, delta 3                                                                                      | transcript: NM_133373    |
| 84444.1      | 84444          | DOT1L       | DOT1-like, histone H3 methyltransferase (S. cerevisiae)                                                       |                          |
| 80854.1      | 80854          | SET7        | SET domain-containing protein 7                                                                               |                          |
| 5335.2       | 5335           | PLCG1       | phospholipase C, gamma 1                                                                                      |                          |
| 9651.1       | 9651           | PLCL4       | phospholipase C-like 4                                                                                        | transcript: XM_371214    |
| 27068.2      | 27068          | PPA2        | Inorganic pyrophosphatase 2                                                                                   |                          |
| 27068.1      | 27068          | PPA2        | Inorganic pyrophosphatase 2                                                                                   |                          |
| 27068.3      | 27068          | PPA2        | Inorganic pyrophosphatase 2                                                                                   |                          |
| 27068.4      | 27068          | PPA2        | Inorganic pyrophosphatase 2                                                                                   |                          |
| 79813.1      | 79813          | EHMT1       | euchromatic histone methyltransferase 1                                                                       |                          |
| 387893.1     | 387893         | SET8        | PR/SET domain containing protein 8                                                                            |                          |
| 5279.1       | 5279           | PIGC        | phosphatidylinositol glycan, class C                                                                          | transcript: NM_002642    |
| 5279.2       | 5279           | PIGC        | phosphatidylinositol glycan, class C                                                                          | transcript: NM_153747    |
| 2235.2       | 2235           | FECH        | ferrochelatase (protoporphyrin)                                                                               |                          |
| 9091.1       | 9091           | PIGQ        | phosphatidylinositol glycan, class Q                                                                          | transcript: NM_004204    |
| 9091.2       | 9091           | PIGQ        | phosphatidylinositol glycan, class Q                                                                          | transcript: NM_148920    |
| 8824.1       | 8824           | CES2        | carboxylesterase 2 (intestine, liver)                                                                         |                          |
| 8824.2       | 8824           | CES2        | carboxylesterase 2 (intestine, liver)                                                                         |                          |
| 259230.1     | 259230         | TMEM23      | transmembrane protein 23                                                                                      |                          |
| 64781.1      | 64781          | CERK        | ceramide kinase                                                                                               |                          |
| 64781.2      | 64781          | CERK        | ceramide kinase                                                                                               |                          |
| 284098.1     | 284098         | PIGW        | phosphatidylinositol glycan, class W                                                                          | transcript: NM_178517    |
| 81849.1      | 81849          | ST6GALNAC5  | ST6 (alpha-N-acetyl-neuraminy1-2,3-beta-galactosyl-1,3)-N-acetylgalactosaminide alpha-2,6-sialyltransferase 5 |                          |
| 54965.1      | 54965          | PIGX        | phosphatidylinositol glycan, class X                                                                          | transcript: NM_017861    |
| 55650.1      | 55650          | PIGV        | phosphatidylinositol glycan, class V                                                                          | transcript: NM_017837    |
| 23556.2      | 23556          | PIGN        | phosphatidylinositol glycan, class N                                                                          | transcript: NM_176787    |
| 54872.1      | 54872          | GPI7        | GPI7 protein                                                                                                  | transcript: NM_017733    |
| 343.1        | 343            | AQP8        | Aquaporin 8                                                                                                   |                          |
| 80055.1      | 80055          | PGAP1       | GPI deacylase                                                                                                 | transcript: NM_024989    |
| 80235.1      | 80235          | SMP3        | SMP3 mannosyltransferase                                                                                      | transcript: NM_025163    |
| 22305.1      | 22305          | ACSL6       | acyl-CoA synthetase long-chain family member 6                                                                |                          |
| 22305.2      | 22305          | ACSL6       | acyl-CoA synthetase long-chain family member 6                                                                |                          |
| 427.2        | 427            | ASAH1       | N-acylsphingosine amidohydrolase (acid ceramidase) 1                                                          |                          |



| Abbreviation | Entrez Gene ID | Gene Symbol | Putative Function                                                                       | Additional notes                  |
|--------------|----------------|-------------|-----------------------------------------------------------------------------------------|-----------------------------------|
| 10678.2      | 10678          | B3GNT1      | UDP-GlcNAc:betaGal beta-1,3-N-acetylglucosaminyltransferase 1                           | transcript: NM_033252             |
| 60559.1      | 60559          | SPCS3       | signal peptidase complex subunit 3 homolog ( <i>S. cerevisiae</i> )                     |                                   |
| 28972.1      | 28972          | SPCS1       | signal peptidase complex subunit 1 homolog                                              |                                   |
| 9789.1       | 9789           | SPCS2       | signal peptidase complex subunit 2 homolog                                              |                                   |
| 90701.1      | 90701          | SEC11L3     | SEC11-like 3 ( <i>S. cerevisiae</i> )                                                   |                                   |
| 50814.1      | 50814          | NSDHL       | NAD(P) dependent steroid dehydrogenase-like                                             |                                   |
| 8654.2       | 8654           | PDE5A       | phosphodiesterase 5A, cGMP-specific                                                     |                                   |
| 8654.3       | 8654           | PDE5A       | phosphodiesterase 5A, cGMP-specific                                                     |                                   |
| 114112.1     | 114112         | TXNRD3      | thioredoxin reductase 3                                                                 |                                   |
| 8534.1       | 8534           | CHST1       | carbohydrate (keratan sulfate Gal-6) sulfotransferase 1                                 | transcript: NM_003654             |
| 9469.1       | 9469           | CHST3       | carbohydrate (chondroitin 6) sulfotransferase 3                                         | transcript: NM_004273             |
| 23563.1      | 23563          | CHST5       | carbohydrate (N-acetylglucosamine 6-O) sulfotransferase 5                               | transcript: NM_012126             |
| 23563.2      | 23563          | CHST5       | carbohydrate (N-acetylglucosamine 6-O) sulfotransferase 5                               | transcript: NM_024533             |
| 4166.1       | 4166           | CHST6       | carbohydrate (N-acetylglucosamine 6-O) sulfotransferase 6                               | transcript: NM_021615             |
| 6566.1       | 6566           | SLC16A1     | solute carrier family 16 (monocarboxylic acid transporters), member 1                   | 1 - 1p12 NM_003051                |
| 373156.1     | 373156         | GSTK1       | glutathione S-transferase kappa 1                                                       |                                   |
| 55454.1      | 55454          | GALNACT-2   | chondroitin sulfate GalNAcT-2                                                           | transcript: NM_018590             |
| 55790.1      | 55790          | ChGn        | chondroitin beta1,4 N-acetylgalactosaminyltransferase                                   | transcript: NM_018371             |
| 113189.1     | 113189         | D4ST1       | dermatan 4 sulfotransferase 1                                                           | transcript: NM_130468             |
| 54480.1      | 54480          | CSGlcA-T    | chondroitin sulfate glucuronyltransferase                                               | transcript: NM_019015             |
| 79586.1      | 79586          | CHPF        | chondroitin polymerizing factor                                                         | transcript: NM_024536             |
| 337876.1     | 337876         | CSS3        | chondroitin sulfate synthase 3                                                          | transcript: NM_175856             |
| 2109.2       | 2109           | ETFB        | Electron-transfer-flavoprotein, beta polypeptide                                        |                                   |
| 2132.2       | 2132           | EXT2        | exostosin (multiple) 2                                                                  | transcript: NM_207122             |
| 64816.1      | 64816          | CYP3A43     | cytochrome P450, family 3, subfamily A, polypeptide                                     |                                   |
| 64816.2      | 64816          | CYP3A43     | cytochrome P450, family 3, subfamily A, polypeptide                                     |                                   |
| 64816.3      | 64816          | CYP3A43     | cytochrome P450, family 3, subfamily A, polypeptide                                     |                                   |
| 26035.1      | 26035          | GLCE        | glucuronyl C5-epimerase                                                                 | transcript: NM_015554             |
| 10991.1      | 10991          | SLC38A3     | solute carrier family 38, member 3                                                      |                                   |
| 206358.1     | 206358         | SLC36A1     | solute carrier family 36 (proton/amino acid symporter), member 1                        |                                   |
| 23428.1      | 23428          | SLC7A8      | solute carrier family 7 (cationic amino acid transporter, y+ system), member 8          |                                   |
| 23428.2      | 23428          | SLC7A8      | solute carrier family 7 (cationic amino acid transporter, y+ system), member 8          |                                   |
| 56301.1      | 56301          | SLC7A10     | solute carrier family 7, (neutral amino acid transporter, y+ system) member 10          |                                   |
| 6510.1       | 6510           | SLC1A5      | solute carrier family 1 (neutral amino acid transporter), member 5                      |                                   |
| 8140.1       | 8140           | SLC7A5      | solute carrier family 7 (cationic amino acid transporter, y+ system), member 5          |                                   |
| 84649.1      | 84649          | DGAT2       | diacylglycerol O-acyltransferase homolog 2 (mouse)                                      |                                   |
| 57030.1      | 57030          | SLC17A7     | solute carrier family 17 (sodium-dependent inorganic phosphate cotransporter), member 7 |                                   |
| 29988.1      | 29988          | SLC2A8      | solute carrier family 2, (facilitated glucose transporter) member 8                     | transcript: NM_014580             |
| 154091.1     | 154091         | SLC2A12     | solute carrier family 2 (facilitated glucose transporter), member 12                    | transcript: NM_145176             |
| 118881.1     | 118881         | COMTD1      | catechol-O-methyltransferase domain containing 1                                        |                                   |
| 766.2        | 766            | CA7         | Carbonic anhydrase VII                                                                  | HUGO ID: 1381/UniProt ID: P43166/ |
| 8501.1       | 8501           | SLC43A1     | solute carrier family 43, member 1                                                      |                                   |
| 6536.1       | 6536           | SLC6A9      | solute carrier family 6 (neurotransmitter transporter, glycine) member 9                |                                   |
| 6536.2       | 6536           | SLC6A9      | solute carrier family 6 (neurotransmitter transporter, glycine) member 9                |                                   |
| 8671.1       | 8671           | SLC4A4      | solute carrier family 4, sodium bicarbonate cotransporter, member 4                     |                                   |
| 57835.1      | 57835          | SLC4A5      | solute carrier family 4, sodium bicarbonate cotransporter, member 5                     |                                   |
| 57835.2      | 57835          | SLC4A5      | solute carrier family 4, sodium bicarbonate cotransporter, member 5                     |                                   |
| 57835.3      | 57835          | SLC4A5      | solute carrier family 4, sodium bicarbonate cotransporter, member 5                     |                                   |
| 57835.4      | 57835          | SLC4A5      | solute carrier family 4, sodium bicarbonate cotransporter, member 5                     |                                   |
| 9497.1       | 9497           | SLC4A7      | solute carrier family 4, sodium bicarbonate cotransporter, member 7                     |                                   |
| 10935.2      | 10935          | PRDX3       | Peroxioredoxin 3                                                                        |                                   |

| Abbreviation | Entrez Gene ID | Gene Symbol | Putative Function                                                               | Additional notes         |
|--------------|----------------|-------------|---------------------------------------------------------------------------------|--------------------------|
| 6817.2       | 6817           | SULT1A1     | sulfotransferase family, cytosolic, 1A, phenol-preferring, member 1             |                          |
| 6817.3       | 6817           | SULT1A1     | sulfotransferase family, cytosolic, 1A, phenol-preferring, member 1             |                          |
| 6817.4       | 6817           | SULT1A1     | sulfotransferase family, cytosolic, 1A, phenol-preferring, member 1             |                          |
| 6817.5       | 6817           | SULT1A1     | sulfotransferase family, cytosolic, 1A, phenol-preferring, member 1             |                          |
| 6799.2       | 6799           | SULT1A2     | Sulfotransferase family, cytosolic, 1A, phenol-preferring, member 2             |                          |
| 6818.2       | 6818           | SULT1A3     | sulfotransferase family, cytosolic, 1A, phenol-preferring, member 3             |                          |
| 6818.3       | 6818           | SULT1A3     | sulfotransferase family, cytosolic, 1A, phenol-preferring, member 3             |                          |
| 480.1        | 480            | ATP1A4      | ATPase, Na <sup>+</sup> /K <sup>+</sup> transporting, alpha 4 polypeptide       |                          |
| 115286.2     | 115286         | SLC25A26    | solute carrier family 25, member 26                                             | UniGene Hs.379386        |
| 115286.3     | 115286         | SLC25A26    | solute carrier family 25, member 26                                             | UniGene Hs.379386        |
| 160728.1     | 160728         | SLC5A8      | solute carrier family 5 (iodide transporter), member 8                          | transcript: NM_145913    |
| 115584.1     | 115584         | SLC5A11     | solute carrier family 5 (sodium/glucose cotransporter), member 11               | transcript: NM_052944    |
| 9963.1       | 9963           | SLC23A1     | solute carrier family 23 (nucleobase transporters), member 1                    | transcript: NM_005847    |
| 9963.2       | 9963           | SLC23A1     | solute carrier family 23 (nucleobase transporters), member 1                    | transcript: NM_152685    |
| 9962.1       | 9962           | SLC23A2     | solute carrier family 23 (nucleobase transporters), member 2                    | transcript: NM_005116    |
| 9962.2       | 9962           | SLC23A2     | solute carrier family 23 (nucleobase transporters), member 2                    | transcript: NM_203327    |
| 10559.1      | 10559          | SLC35A1     | solute carrier family 35 (CMP-sialic acid transporter), member A1               | transcript: NM_006416    |
| 2030.1       | 2030           | SLC29A1     | solute carrier family 29 (nucleoside transporters), member 1                    |                          |
| 55343.1      | 55343          | SLC35C1     | solute carrier family 35, member C1                                             | transcript: NM_018389    |
| 9058.1       | 9058           | SLC13A2     | solute carrier family 13 (sodium-dependent dicarboxylate transporter), member 2 | transcript: NM_003984    |
| 64849.1      | 64849          | SLC13A3     | solute carrier family 13 (sodium-dependent dicarboxylate transporter), member 3 | transcript: NM_001011554 |
| 64849.2      | 64849          | SLC13A3     | solute carrier family 13 (sodium-dependent dicarboxylate transporter), member 3 | transcript: NM_022829    |
| 6581.1       | 6581           | SLC22A3     | solute carrier family 22 (extraneuronal monoamine transporter), member 3        |                          |
| 6584.1       | 6584           | SLC22A5     | solute carrier family 22 (organic cation transporter), member 5                 |                          |
| 6578.1       | 6578           | SLC02A1     | solute carrier organic anion transporter family, member 2A1                     |                          |
| 6569.1       | 6569           | SLC34A1     | solute carrier family 34 (sodium phosphate), member 1                           |                          |
| 10568.1      | 10568          | SLC34A2     | solute carrier family 34 (sodium phosphate), member 2                           |                          |
| 1811.1       | 1811           | SLC26A3     | solute carrier family 26, member 3                                              |                          |
| 5172.1       | 5172           | SLC26A4     | solute carrier family 26, member 4                                              |                          |
| 65010.1      | 65010          | SLC26A6     | solute carrier family 26, member 6                                              |                          |
| 65010.2      | 65010          | SLC26A6     | solute carrier family 26, member 6                                              |                          |
| 65010.3      | 65010          | SLC26A6     | solute carrier family 26, member 6                                              |                          |
| 115111.1     | 115111         | SLC26A7     | solute carrier family 26, member 7                                              |                          |
| 115111.2     | 115111         | SLC26A7     | solute carrier family 26, member 7                                              |                          |
| 116369.1     | 116369         | SLC26A8     | solute carrier family 26, member 8                                              |                          |
| 116369.2     | 116369         | SLC26A8     | solute carrier family 26, member 8                                              |                          |
| 6567.1       | 6567           | SLC16A2     | solute carrier family 16 (monocarboxylic acid transporters), member 2           | transcript: NM_006517    |
| 3177.1       | 3177           | SLC29A2     | solute carrier family 29 (nucleoside transporters), member 2                    | IT                       |
| 10998.1      | 10998          | SLC27A5     | solute carrier family 27 (fatty acid transporter), member 5                     |                          |
| 10257.1      | 10257          | ABCC4       | ATP-binding cassette, sub-family C (CFTR/MRP), member 4                         | IT                       |
| 10057.1      | 10057          | ABCC5       | ATP-binding cassette, sub-family C (CFTR/MRP), member 5                         | IT                       |
| 10057.2      | 10057          | ABCC5       | ATP-binding cassette, sub-family C (CFTR/MRP), member 5                         | IT                       |
| 8714.1       | 8714           | ABCC3       | ATP-binding cassette, sub-family C (CFTR/MRP), member 3                         |                          |
| 8714.2       | 8714           | ABCC3       | ATP-binding cassette, sub-family C (CFTR/MRP), member 3                         |                          |
| 6553.1       | 6553           | SLC9A5      | solute carrier family 9 (sodium/hydrogen exchanger), isoform 5                  | transcript: NM_004594    |
| 8714.3       | 8714           | ABCC3       | ATP-binding cassette, sub-family C (CFTR/MRP), member 3                         |                          |
| 137964.1     | 137964         | AGPAT6      | 1-acylglycerol-3-phosphate O-acyltransferase 6                                  | transcript: NM_178819    |

| Abbreviation | Entrez Gene ID | Gene Symbol | Putative Function                                                            | Additional notes                                                                                                                                                                                                                                                                                                |
|--------------|----------------|-------------|------------------------------------------------------------------------------|-----------------------------------------------------------------------------------------------------------------------------------------------------------------------------------------------------------------------------------------------------------------------------------------------------------------|
| 9990.1       | 9990           | SLC12A6     | solute carrier family 12 (potassium/chloride transporters), member 6         | transcript: NM_005135                                                                                                                                                                                                                                                                                           |
| 50506.1      | 50506          | DUOX2       | dual oxidase 2                                                               |                                                                                                                                                                                                                                                                                                                 |
| 26503.1      | 26503          | SLC17A5     | solute carrier family 17 (anion/sugar transporter), member 5                 |                                                                                                                                                                                                                                                                                                                 |
| 10005.1      | 10005          | PTE1        | peroxisomal acyl-CoA thioesterase                                            |                                                                                                                                                                                                                                                                                                                 |
| 10005.2      | 10005          | PTE1        | peroxisomal acyl-CoA thioesterase                                            |                                                                                                                                                                                                                                                                                                                 |
| 10005.3      | 10005          | PTE1        | peroxisomal acyl-CoA thioesterase                                            |                                                                                                                                                                                                                                                                                                                 |
| 10965.1      | 10965          | ZAP128      | peroxisomal long-chain acyl-coA thioesterase                                 | transcript: NM_006821                                                                                                                                                                                                                                                                                           |
| 3038.2       | 3038           | HAS3        | hyaluronan synthase 3                                                        |                                                                                                                                                                                                                                                                                                                 |
| 8875.2       | 8875           | VNN2        | vanin 2                                                                      | IT                                                                                                                                                                                                                                                                                                              |
| 55350.3      | 55350          | VNN3        | vanin 3                                                                      | IT                                                                                                                                                                                                                                                                                                              |
| 113235.1     | 113235         | MGC9564     | similar to RIKEN cDNA 1110002C08 gene                                        | transcript: NM_080669                                                                                                                                                                                                                                                                                           |
| 10690.1      | 10690          | FUT9        | fucosyltransferase 9 (alpha (1,3) fucosyltransferase)                        |                                                                                                                                                                                                                                                                                                                 |
| 9388.1       | 9388           | LIPG        | lipase, endothelial                                                          |                                                                                                                                                                                                                                                                                                                 |
| 10396.1      | 10396          | ATP8A1      | ATPase, aminophospholipid transporter (APLT), Class I, type 8A, member 1     |                                                                                                                                                                                                                                                                                                                 |
| 57194.1      | 57194          | ATP10A      | ATPase, Class V, type 10A                                                    |                                                                                                                                                                                                                                                                                                                 |
| 8228.1       | 8228           | PNPLA4      | keratinocyte retinyl ester hydrolase                                         | IT                                                                                                                                                                                                                                                                                                              |
| 8608.1       | 8608           | RDH16       | retinol dehydrogenase 16 (all-trans and 13-cis)                              | IT                                                                                                                                                                                                                                                                                                              |
| 8897.1       | 8897           | MTMR3       | myotubularin related protein 3                                               | transcript: NM_021090                                                                                                                                                                                                                                                                                           |
| 8897.2       | 8897           | MTMR3       | myotubularin related protein 3                                               | transcript: NM_153050                                                                                                                                                                                                                                                                                           |
| 8897.3       | 8897           | MTMR3       | myotubularin related protein 3                                               | transcript: NM_153051                                                                                                                                                                                                                                                                                           |
| 4363.1       | 4363           | ABCC1.1     | ATP-binding cassette, sub-family C (CFTR/MRP), member                        |                                                                                                                                                                                                                                                                                                                 |
| 522.5        | 522            | Atp5j.5-m   | ATP synthase, H+ transporting, mitochondrial F0 complex, subunit F6          | Transcript Variant: This variant (5) differs in the 5' UTR and the 5' coding region, compared to variant 1. The predicted isoform (b) is longer, and it contains a distinct N-terminus, compared to isoform a. The existence of a translated product from this transcript needs to be experimentally confirmed. |
| 10312.2      | 10312          | TCIRG1      | T-cell, immune regulator 1, ATPase, H+ transporting, lysosomal V0 protein A3 |                                                                                                                                                                                                                                                                                                                 |
