# Supplementary material
Source: PubMed Central journal article supplement (PMC1794290)
Supplement: pnas_0610772104_14.pdf [file pnas_0610772104_14.pdf]

**Table 9: *H. sapiens* Recon 1 network gaps.** Final list of network gaps in Recon 1. Gaps are defined as metabolites that can only be produced or consumed and are compartment-specific. Note that the gap may arise from more than one reaction; only one has been shown here for demonstrative purposes. Each gap was carefully reviewed and classified as either model-scope (i.e., reactions which produce/consume the metabolite are part of pathways which are beyond the scope of this reaction) or knowledge-base (i.e., gap cannot be resolved due to lack of knowledge of how a particular metabolite is produced or consumed).

Reviewer initials

ND: Natalie C. Duarte   SAB: Scott A. Becker

NJ: Neema Jamshidi   MM: Monica L. Mo

IT: Ines Thiele

| Metabolite Abbreviation | Metabolite Name                                                           | Gap Type      | Compartment           | Reaction Abbreviation | Notes                                                                                                                                                                                                                                                                                                                                                                                                                                 | Reviewer |
|-------------------------|---------------------------------------------------------------------------|---------------|-----------------------|-----------------------|---------------------------------------------------------------------------------------------------------------------------------------------------------------------------------------------------------------------------------------------------------------------------------------------------------------------------------------------------------------------------------------------------------------------------------------|----------|
| 2mcit                   | 2-Methylcitrate                                                           | Produced only | Cytosol               | 2MCITt                | added transport rxn 2MCITt; methylcitrate is excreted in urine of patients who suffer from propionic acidemia (Weidman et al. 1979)                                                                                                                                                                                                                                                                                                   | MM       |
| 42A3HP24DB              | 4-(2-Amino-3-hydroxyphenyl)-2,4-dioxobutanoate                            | Produced only | Cytosol               | 3HKYNAKGAT            | knowledge-base gap                                                                                                                                                                                                                                                                                                                                                                                                                    | SAB      |
| 3hpcoa                  | 3-Hydroxypropionyl-CoA                                                    | Consumed only | Cytosol               | 3HPCOAHYD             | model-scope gap                                                                                                                                                                                                                                                                                                                                                                                                                       | SAB      |
| msa                     | Malonate semialdehyde                                                     | Produced only | Cytosol               | 3HPPD                 | knowledge-based gap; this rxn has been described and studied in mammals, but not in humans; gap could be filled since msa is metabolized in mitochondria, but there is no evidence for msa mitochondrial transport activity                                                                                                                                                                                                           | MM       |
| 48dhoxquin              | 4,8-Dihydroxyquinoline                                                    | Produced only | Cytosol               | 3HXKYNOXDA            | model-scope gap                                                                                                                                                                                                                                                                                                                                                                                                                       | SAB      |
| 5hoxnfkyn               | 5-Hydroxy-N-formylkynurenine                                              | Produced only | Cytosol               | 5HTRPDOX              | knowledge-base gap: not enough evidence to include reaction before this in line                                                                                                                                                                                                                                                                                                                                                       | SAB      |
| 5hxkyn                  | 5-Hydroxykynurenine                                                       | Consumed only | Cytosol               | 5HXKYNDCL             | knowledge-base gap: not enough evidence to include reaction before this in line                                                                                                                                                                                                                                                                                                                                                       | SAB      |
| 46dhoxquin              | 4,6-Dihydroxyquinoline                                                    | Produced only | Cytosol               | 5HXKYNOXDA            | model-scope gap                                                                                                                                                                                                                                                                                                                                                                                                                       | SAB      |
| therm_hs                | trihexosyl ceramide (homo sapiens)                                        | Produced only | Cytosol               | A4GALTc               | pathway complete in Golgi - knowledge gap about extent of cytosolic metabolism of therm_hs                                                                                                                                                                                                                                                                                                                                            | NJ       |
| 4abut                   | 4-Aminobutanoate                                                          | Consumed only | Lysosome              | ABUT2rL               | knowledge-base gap                                                                                                                                                                                                                                                                                                                                                                                                                    | SAB      |
| ppa                     | Propionate (n-C3:0)                                                       | Consumed only | Cytosol               | ACCOAL                | gap removed; added rxn for extracellular -> cytosolic transport based on ref in thuy's mito model                                                                                                                                                                                                                                                                                                                                     | ND       |
| acgbgbside_hs           | beta GalNAc globoside (homo sapiens)                                      | Produced only | Lysosome              | ACGBGBSIDEt           | gap removed by single reaction addition: NAGAlly added in analogy to NAGAlly (no real evidence that this occurs in vivo)                                                                                                                                                                                                                                                                                                              | NJ       |
| acACP                   | Acetyl-ACP                                                                | Produced only | Cytosol               | ACOATA                | FA synthesis is lumped, so activation w/ ACP will not be utilized at this point, this may be useful in a future version of the reconstruction if FAS is 'unlumped'                                                                                                                                                                                                                                                                    | NJ       |
| acorn                   | N2-Acetyl-L-ornithine                                                     | Consumed only | Cytosol               | ACODA                 | knowledge-base gap                                                                                                                                                                                                                                                                                                                                                                                                                    | SAB      |
| ppa                     | Propionate (n-C3:0)                                                       | Consumed only | Cytosol               | ACS2                  | gap removed; added rxn for extracellular -> cytosolic transport based on ref in thuy's mito model                                                                                                                                                                                                                                                                                                                                     | ND       |
| 5moxact                 | 5-Methoxyindoleacetate                                                    | Produced only | Cytosol               | ACSOMT                | model-scope gap: end of the line in KEGG                                                                                                                                                                                                                                                                                                                                                                                              | SAB      |
| ade                     | Adenine                                                                   | Consumed only | Lysosome              | ADEt                  | leave gap; knowledge gap: at least i have no idea of the function of adenine in lysosome but uptake was studied by PMID: 2925670                                                                                                                                                                                                                                                                                                      | IT       |
| adpglc                  | ADPglucose                                                                | Consumed only | Cytosol               | ADPGLC                | leave gap: ADPglucose is an important precursor bacterial glycogen and plant starch synthesis, whereas ADP-mannose has no known physiological function, although the commercially available synthetic compound can replace ADP-heptoses in bacterial outer-membrane lipopolysaccharide synthesis in vitro . ADP-ribose might therefore also be the most important substrate for human in vivo (from discussion of Gasmí et al., 1999) | IT       |
| adpman                  | ADPmannose                                                                | Consumed only | Cytosol               | ADPMAN                | leave gap: ADPglucose is an important precursor bacterial glycogen and plant starch synthesis, whereas ADP-mannose has no known physiological function, although the commercially available synthetic compound can replace ADP-heptoses in bacterial outer-membrane lipopolysaccharide synthesis in vitro . ADP-ribose might therefore also be the most important substrate for human in vivo (from discussion of Gasmí et al., 1999) | IT       |
| 3padsel                 | 3'-Phosphoadenylylselenate                                                | Produced only | Cytosol               | ADSELK                | knowledge-base gap                                                                                                                                                                                                                                                                                                                                                                                                                    | SAB      |
| dak2gpe_hs              | 1-alkenyl 2-acylglycerol 3-phosphoethanolamine plasmalogen (homo sapiens) | Produced only | Cytosol               | AGLPED                | knowledge gap and model scope limitations - rxns included up to extent of biochem texts (Voet and Voet/Murray's Biochem), further details may be gleanable from lit, will require more time investment                                                                                                                                                                                                                                | NJ       |
| ahcys                   | S-Adenosyl-L-homocysteine                                                 | Produced only | Endoplasmic Reticulum | AHCYStr               | gap filled, added AHCYStr                                                                                                                                                                                                                                                                                                                                                                                                             | NJ       |
| ala-L                   | L-Alanine                                                                 | Consumed only | Lysosome              | ALAt2rL               | model-scope gap                                                                                                                                                                                                                                                                                                                                                                                                                       | SAB      |
| ind3ac                  | Indole-3-acetate                                                          | Produced only | Cytosol               | ALDD20x               | model-scope gap                                                                                                                                                                                                                                                                                                                                                                                                                       | SAB      |
| dha                     | Dihydroxyacetone                                                          | Produced only | Cytosol               | ALKP                  | model scope limitations in addition to knowledge gaps: PMID 9370313, 9370314                                                                                                                                                                                                                                                                                                                                                          | NJ       |
| 12HPET                  | 12-Hydroperoxyeicosa-5,8,10,14-tetraenoate                                | Produced only | Cytosol               | ALOX12                | 12HPETe, unknown mechanism, needs to get into EC space, inflamm mediator, knowledge gap area (subsequent metabolism, etc)                                                                                                                                                                                                                                                                                                             | NJ       |
| 12RHPET                 | 12R-Hydroperoxyeicosatetraenoate                                          | Produced only | Cytosol               | ALOX12R               | 12RHPETe, unknown mechanism, needs to get into EC space, inflamm mediator, knowledge gap area (subsequent metabolism, etc)                                                                                                                                                                                                                                                                                                            | NJ       |
| 15HPET                  | 15-Hydroperoxyeicosatetraenoic acid                                       | Produced only | Cytosol               | ALOX15                | 15HPETe, unknown mechanism, needs to get into EC space, inflamm mediator, knowledge gap area (subsequent metabolism, etc)                                                                                                                                                                                                                                                                                                             | NJ       |
| amet                    | S-Adenosyl-L-methionine                                                   | Consumed only | Endoplasmic Reticulum | AMETr                 | gap filled, added AMETr                                                                                                                                                                                                                                                                                                                                                                                                               | NJ       |
| andrstrnglc             | androsterone glucuronide                                                  | Consumed only | Cytosol               | ANDRSTRNGLCt          | ANDRSTRNGLCtr, ANDRSTRNGLCt                                                                                                                                                                                                                                                                                                                                                                                                           | NJ       |
| ap4a                    | P1,P4-Bis(5'-adenosyl) tetraphosphate                                     | Consumed only | Cytosol               | AP4AH1                | leave gap; for explanation read not of reaction                                                                                                                                                                                                                                                                                                                                                                                       | IT       |

| Metabolite Abbreviation | Metabolite Name                                         | Gap Type      | Compartment           | Reaction Abbreviation | Notes                                                                                                                                                                                                | Reviewer |
|-------------------------|---------------------------------------------------------|---------------|-----------------------|-----------------------|------------------------------------------------------------------------------------------------------------------------------------------------------------------------------------------------------|----------|
| m2mn                    | (alpha-D-mannosyl)2-beta-D-mannosyl-N-acetylglucosamine | Consumed only | Cytosol               | A_MANASE              | leave reaction even though it causes gap; it's a redundant reaction since the primary rxn is in lysosome, but there's evidence it might be in cytosol                                                | ND       |
| mn                      | beta-1,4-mannose-N-acetylglucosamine                    | Produced only | Cytosol               | A_MANASE              | leave reaction even though it causes gap; it's a redundant reaction since the primary rxn is in lysosome, but there's evidence it might be in cytosol                                                | ND       |
| bdg2hc                  | cis-beta-D-Glucosyl-2-hydroxycinnamate                  | Consumed only | Cytosol               | BDG2HCGHD             | model-scope gap: unimportant                                                                                                                                                                         | SAB      |
| 2coum                   | cis-2-Hydroxy cinnamate                                 | Produced only | Cytosol               | BDG2HCGHD             | model-scope gap: unimportant                                                                                                                                                                         | SAB      |
| betald                  | Betaine aldehyde                                        | Consumed only | Cytosol               | BETALDHx              | knowledge-based gap                                                                                                                                                                                  | MM       |
| bhb                     | (R)-3-Hydroxybutanoate                                  | Consumed only | Cytosol               | BHBt                  | gap removed; added extracellular transport rxn                                                                                                                                                       | ND       |
| bhb                     | (R)-3-Hydroxybutanoate                                  | Consumed only | Cytosol               | BHBtm                 | gap removed; added extracellular transport rxn                                                                                                                                                       | ND       |
| bz                      | Benzoate                                                | Consumed only | Cytosol               | BZt                   | gap filled, added BZt                                                                                                                                                                                | NJ       |
| bz                      | Benzoate                                                | Consumed only | Cytosol               | BZr                   | gap filled, added BZt                                                                                                                                                                                | NJ       |
| chl2                    | Cob(II)alamin                                           | Produced only | Mitochondria          | CBL2m                 | leave for the moment --> unfinished PW                                                                                                                                                               | IT       |
| prostg1                 | (13E)-11alpha-Hydroxy-9,15-dioxoprost-13-enoate         | Consumed only | Cytosol               | CBR1                  | principally a knowledge gap problem - further metabolism, etc unknown, since at the 'fringes' partial model scope gap also - see Goodman and Gilman, Murray Biochem for overall pathway              | NJ       |
| cca_d3                  | Calcitric acid (D3)                                     | Consumed only | Mitochondria          | CCA_D3tm              | knowledge gap: reactions as well as enzymes for vit D degradation are unknown                                                                                                                        | IT       |
| chsterol                | Cholesterol                                             | Consumed only | Golgi Apparatus       | CHSTEROLtg            | By IT shows transport between golgi and plasma membrane                                                                                                                                              | NJ       |
| chtn                    | chitin                                                  | Consumed only | Cytosol               | CHTNASE               | leave gap; function has only been characterized in vitro, no physiologically known function                                                                                                          | ND       |
| clpn_hs                 | cardiolipin (homo sapiens)                              | Produced only | Cytosol               | CLS_hs                | cardiolipin is a biomass constituent, should be made part of biomass, in future can also update metabolic interconversions                                                                           | NJ       |
| co2                     | CO2                                                     | Consumed only | Nucleus               | CO2m                  | gap is due to transporter rxn in nucleus (not needed now, but ok to leave in)                                                                                                                        | ND       |
| ntm2amep                | N-Trimethyl-2-aminoethylphosphonate                     | Consumed only | Cytosol               | CPCTDTX               | knowledge gap - strong evidence for the presence of these metabolites in humans lacking, although the enzyme can carry out this conversion (in addition to others more relevant to human metabolism) | NJ       |
| cmptm2amep              | CMP-N-trimethyl-2-aminoethylphosphonate                 | Produced only | Cytosol               | CPCTDTX               | knowledge gap - strong evidence for the presence of these metabolites in humans lacking, although the enzyme can carry out this conversion (in addition to others more relevant to human metabolism) | NJ       |
| crtn                    | Creatinine                                              | Produced only | Cytosol               | CRTNSyn               | model-scope gap: a transporter could be added to get this out of the cell, but relatively unimportant                                                                                                | SAB      |
| crstrn                  | Corticosterone                                          | Produced only | Endoplasmic Reticulum | CRTSTRNtr             | CRTSTRNtr, CRTSTRNtm                                                                                                                                                                                 | NJ       |
| thcys                   | Thiocysteine                                            | Produced only | Cytosol               | CYSLYSL               | knowledge-based gap                                                                                                                                                                                  | MM       |
| ala-D                   | D-Alanine                                               | Consumed only | Lysosome              | DALAt2rL              | knowledge-base gap: how does alanine get into the lysosome--good evidence for inclusion regardless of gap                                                                                            | SAB      |
| dmpp                    | Dimethylallyl diphosphate                               | Consumed only | Cytosol               | DMATT                 | DMATTx version is complete - w/out gaps - was in original copy of gaps list                                                                                                                          | NJ       |
| ipdp                    | Isopentenyl diphosphate                                 | Consumed only | Cytosol               | DMATT                 | GRTTx version is complete - w/out gaps - was not in this list but was in original list as gap                                                                                                        | NJ       |
| dmhptcoa                | 2,6 dimethylheptanoyl-CoA                               | Consumed only | Cytosol               | DMHPTCRNCPT1          | DMHPTCRNCPT1 added (although the metabolism of this metabolite has not been well characterized, it should be transportable on the same carnitine shuttle as other FA)                                | NJ       |
| lyxnt                   | L-lyxonate                                              | Produced only | Cytosol               | DOGULND1              | known gap; could not find any specific info as to how this is metabolized in humans                                                                                                                  | ND       |
| xyInt                   | L-Xylonate                                              | Produced only | Cytosol               | DOGULND2              | known gap; could not find any specific info as to how this is metabolized in humans                                                                                                                  | ND       |
| thrnt                   | L-Threonate                                             | Produced only | Cytosol               | DOGULNO1              | known gap; could not find any specific info as to how this is metabolized in humans                                                                                                                  | ND       |
| eryth                   | L-Erythrulose                                           | Produced only | Cytosol               | DOGULNO2              | known gap; could not find any specific info as to how this is metabolized in humans                                                                                                                  | ND       |
| e4hglu                  | L-erythro-4-Hydroxyglutamate                            | Consumed only | Cytosol               | EHGLAT                | knowledge-base gap: cytosolic enzyme found for a reaction that is not a gap in the mitochondria                                                                                                      | SAB      |
| 4h2oglt                 | 4-Hydroxy-2-oxoglutarate                                | Produced only | Cytosol               | EHGLAT                | gap OK--cytosolic localized enzyme found for reaction                                                                                                                                                | SAB      |
| s2l2n2m2m               | de-Fuc form of PA6 (w/o peptide linkage)                | Consumed only | Cytosol               | ENGASE                | leave reaction even though it causes gap; it's a redundant reaction since the primary rxn is in lysosome, but there's evidence it might be in cytosol                                                | ND       |
| n2m2nm                  | n2m2mnasn (w/o peptide linkage)                         | Consumed only | Cytosol               | ENGASE2               | leave reaction even though it causes gap; it's a redundant reaction since the primary rxn is in lysosome, but there's evidence it might be in cytosol                                                | ND       |
| n2m2nmn                 | reducing GlcNAc removed form of n2m2mnasn (w/o peptide) | Produced only | Cytosol               | ENGASE2               | leave reaction even though it causes gap; it's a redundant reaction since the primary rxn is in lysosome, but there's evidence it might be in cytosol                                                | ND       |
| 2ameph                  | (2-Aminoethyl)phosphonate                               | Consumed only | Cytosol               | EPCTX                 | knowledge gap - strong evidence for the presence of these metabolites in humans lacking, although the enzyme can carry out this conversion (in addition to others more relevant to human metabolism) | NJ       |
| cmp2amep                | CMP-2-aminoethylphosphonate                             | Produced only | Cytosol               | EPCTX                 | knowledge gap - strong evidence for the presence of these metabolites in humans lacking, although the enzyme can carry out this conversion (in addition to others more relevant to human metabolism) | NJ       |

| Metabolite Abbreviation | Metabolite Name                                         | Gap Type      | Compartment           | Reaction Abbreviation | Notes                                                                                                                                                                                                | Reviewer |
|-------------------------|---------------------------------------------------------|---------------|-----------------------|-----------------------|------------------------------------------------------------------------------------------------------------------------------------------------------------------------------------------------------|----------|
| m2mn                    | (alpha-D-mannosyl)2-beta-D-mannosyl-N-acetylglucosamine | Consumed only | Cytosol               | A_MANASE              | leave reaction even though it causes gap; it's a redundant reaction since the primary rxn is in lysosome, but there's evidence it might be in cytosol                                                | ND       |
| mn                      | beta-1,4-mannose-N-acetylglucosamine                    | Produced only | Cytosol               | A_MANASE              | leave reaction even though it causes gap; it's a redundant reaction since the primary rxn is in lysosome, but there's evidence it might be in cytosol                                                | ND       |
| bdg2hc                  | cis-beta-D-Glucosyl-2-hydroxycinnamate                  | Consumed only | Cytosol               | BDG2HCGHD             | model-scope gap: unimportant                                                                                                                                                                         | SAB      |
| 2coum                   | cis-2-Hydroxy cinnamate                                 | Produced only | Cytosol               | BDG2HCGHD             | model-scope gap: unimportant                                                                                                                                                                         | SAB      |
| betald                  | Betaine aldehyde                                        | Consumed only | Cytosol               | BETALDHx              | knowledge-based gap                                                                                                                                                                                  | MM       |
| bhb                     | (R)-3-Hydroxybutanoate                                  | Consumed only | Cytosol               | BHBt                  | gap removed; added extracellular transport rxn                                                                                                                                                       | ND       |
| bhb                     | (R)-3-Hydroxybutanoate                                  | Consumed only | Cytosol               | BHBtm                 | gap removed; added extracellular transport rxn                                                                                                                                                       | ND       |
| bz                      | Benzoate                                                | Consumed only | Cytosol               | BZt                   | gap filled, added BZt                                                                                                                                                                                | NJ       |
| bz                      | Benzoate                                                | Consumed only | Cytosol               | BZr                   | gap filled, added BZt                                                                                                                                                                                | NJ       |
| chl2                    | Cob(II)alamin                                           | Produced only | Mitochondria          | CBL2m                 | leave for the moment --> unfinished PW                                                                                                                                                               | IT       |
| prostg1                 | (13E)-11alpha-Hydroxy-9,15-dioxoprost-13-enoate         | Consumed only | Cytosol               | CBR1                  | principally a knowledge gap problem - further metabolism, etc unknown, since at the 'fringes' partial model scope gap also - see Goodman and Gilman, Murray Biochem for overall pathway              | NJ       |
| cca_d3                  | Calcitric acid (D3)                                     | Consumed only | Mitochondria          | CCA_D3tm              | knowledge gap: reactions as well as enzymes for vit D degradation are unknown                                                                                                                        | IT       |
| chsterol                | Cholesterol                                             | Consumed only | Golgi Apparatus       | CHSTEROLtg            | By IT shows transport between golgi and plasma membrane                                                                                                                                              | NJ       |
| chtn                    | chitin                                                  | Consumed only | Cytosol               | CHTNASE               | leave gap; function has only been characterized in vitro, no physiologically known function                                                                                                          | ND       |
| clpn_hs                 | cardiolipin (homo sapiens)                              | Produced only | Cytosol               | CLS_hs                | cardiolipin is a biomass constituent, should be made part of biomass, in future can also update metabolic interconversions                                                                           | NJ       |
| co2                     | CO2                                                     | Consumed only | Nucleus               | CO2m                  | gap is due to transporter rxn in nucleus (not needed now, but ok to leave in)                                                                                                                        | ND       |
| ntm2amep                | N-Trimethyl-2-aminoethylphosphonate                     | Consumed only | Cytosol               | CPCTDTX               | knowledge gap - strong evidence for the presence of these metabolites in humans lacking, although the enzyme can carry out this conversion (in addition to others more relevant to human metabolism) | NJ       |
| cmptm2amep              | CMP-N-trimethyl-2-aminoethylphosphonate                 | Produced only | Cytosol               | CPCTDTX               | knowledge gap - strong evidence for the presence of these metabolites in humans lacking, although the enzyme can carry out this conversion (in addition to others more relevant to human metabolism) | NJ       |
| crtn                    | Creatinine                                              | Produced only | Cytosol               | CRTNsyn               | model-scope gap: a transporter could be added to get this out of the cell, but relatively unimportant                                                                                                | SAB      |
| crstrn                  | Corticosterone                                          | Produced only | Endoplasmic Reticulum | CRTSTRNtr             | CRTSTRNtr, CRTSTRNtm                                                                                                                                                                                 | NJ       |
| theys                   | Thiocysteine                                            | Produced only | Cytosol               | CYSLYSL               | knowledge-based gap                                                                                                                                                                                  | MM       |
| ala-D                   | D-Alanine                                               | Consumed only | Lysosome              | DALAt2rL              | knowledge-base gap: how does alanine get into the lysosome--good evidence for inclusion regardless of gap                                                                                            | SAB      |
| dmpp                    | Dimethylallyl diphosphate                               | Consumed only | Cytosol               | DMATT                 | DMATTx version is complete - w/out gaps - was in original copy of gaps list                                                                                                                          | NJ       |
| ipdp                    | Isopentenyl diphosphate                                 | Consumed only | Cytosol               | DMATT                 | GRTTx version is complete - w/out gaps - was not in this list but was in original list as gap                                                                                                        | NJ       |
| dmhptcoa                | 2,6 dimethylheptanoyl-CoA                               | Consumed only | Cytosol               | DMHPTCRNCPT1          | DMHPTCRNCPT1 added (although the metabolism of this metabolite has not been well characterized, it should be transportable on the same carnitine shuttle as other FA)                                | NJ       |
| lyxnt                   | L-lyxonate                                              | Produced only | Cytosol               | DOGULND1              | known gap; could not find any specific info as to how this is metabolized in humans                                                                                                                  | ND       |
| xyInt                   | L-Xylonate                                              | Produced only | Cytosol               | DOGULND2              | known gap; could not find any specific info as to how this is metabolized in humans                                                                                                                  | ND       |
| thrnt                   | L-Threonate                                             | Produced only | Cytosol               | DOGULNO1              | known gap; could not find any specific info as to how this is metabolized in humans                                                                                                                  | ND       |
| eryth                   | L-Erythrulose                                           | Produced only | Cytosol               | DOGULNO2              | known gap; could not find any specific info as to how this is metabolized in humans                                                                                                                  | ND       |
| e4hglu                  | L-erythro-4-Hydroxyglutamate                            | Consumed only | Cytosol               | EHGLAT                | knowledge-base gap: cytosolic enzyme found for a reaction that is not a gap in the mitochondria                                                                                                      | SAB      |
| 4h2oglt                 | 4-Hydroxy-2-oxoglutarate                                | Produced only | Cytosol               | EHGLAT                | gap OK--cytosolic localized enzyme found for reaction                                                                                                                                                | SAB      |
| s2l2n2m2m               | de-Fuc form of PA6 (w/o peptide linkage)                | Consumed only | Cytosol               | ENGASE                | leave reaction even though it causes gap; it's a redundant reaction since the primary rxn is in lysosome, but there's evidence it might be in cytosol                                                | ND       |
| n2m2nm                  | n2m2mnasn (w/o peptide linkage)                         | Consumed only | Cytosol               | ENGASE2               | leave reaction even though it causes gap; it's a redundant reaction since the primary rxn is in lysosome, but there's evidence it might be in cytosol                                                | ND       |
| n2m2nmn                 | reducing GlcNAc removed form of n2m2mnasn (w/o peptide) | Produced only | Cytosol               | ENGASE2               | leave reaction even though it causes gap; it's a redundant reaction since the primary rxn is in lysosome, but there's evidence it might be in cytosol                                                | ND       |
| 2ameph                  | (2-Aminoethyl)phosphonate                               | Consumed only | Cytosol               | EPCTX                 | knowledge gap - strong evidence for the presence of these metabolites in humans lacking, although the enzyme can carry out this conversion (in addition to others more relevant to human metabolism) | NJ       |
| cmp2amep                | CMP-2-aminoethylphosphonate                             | Produced only | Cytosol               | EPCTX                 | knowledge gap - strong evidence for the presence of these metabolites in humans lacking, although the enzyme can carry out this conversion (in addition to others more relevant to human metabolism) | NJ       |

| Metabolite Abbreviation | Metabolite Name                           | Gap Type      | Compartment     | Reaction Abbreviation | Notes                                                                                                                                                                                                                                                           | Reviewer |
|-------------------------|-------------------------------------------|---------------|-----------------|-----------------------|-----------------------------------------------------------------------------------------------------------------------------------------------------------------------------------------------------------------------------------------------------------------|----------|
| lcts                    | Lactose                                   | Consumed only | Cytosol         | LCTSd                 | gap removed; have decided to remove this reaction since it probably doesn't exist in the cytosol - I don't want to associate it with the lysosomal complex until it has been experimentally verified                                                            | ND       |
| nformanth               | N-Formylanthranilate                      | Produced only | Cytosol         | LFORKYNHYD            | reaction based on KEGG--probably OK                                                                                                                                                                                                                             | SAB      |
| lipoate                 | Lipoate                                   | Produced only | Cytosol         | LIPoi                 | leave gap for the moment; lipoate gets imported in cell, converted to dihydrolipoate and this compounds is the active form and gets directly exported again - unknown mechanism. Concrete reaction from lipoate to dihydrolipoate is not really clear to me     | IT       |
| lanost                  | Lanosterol                                | Consumed only | Cytosol         | LNS14DM               | was stated to occur in cyt and ER -> ER has the completed pathway                                                                                                                                                                                               | NJ       |
| 44mctr                  | 4,4-dimethylcholesta-8,14,24-trienol      | Produced only | Cytosol         | LNS14DM               | was stated to occur in cyt and ER -> ER has the completed pathway                                                                                                                                                                                               | NJ       |
| lum3                    | Lumisterol 3                              | Produced only | Cytosol         | LS3                   | is not really a gap; conversion takes place when sufficient Vit D has been produced in skin cell - this mechanism avoids toxicity by Vit D-1 included this reaction for completeness                                                                            | IT       |
| 2mcit                   | 2-Methylcitrate                           | Produced only | Cytosol         | MCITS                 | added transport rxn 2MCIT; methylcitrate is excreted in urine of patients who suffer from propionic acidemia (Weidman et al. 1979)                                                                                                                              | MM       |
| malACP                  | Malonyl-[acyl-carrier protein]            | Produced only | Cytosol         | MCOATA                | FA synthesis is lumped, so activation w/ ACP will not be utilized at this point, this may be useful in a future version of the reconstruction FAS is 'unlumped'                                                                                                 | NJ       |
| fna5moxam               | Formyl-N-acetyl-5-methoxykynurenamine     | Produced only | Cytosol         | MELATN23DOX           | citation describes reaction but unknown where product goes                                                                                                                                                                                                      | SAB      |
| 6hoxmelatn              | 6-Hydroxymelatonin                        | Produced only | Cytosol         | MELATNOX              | model-scope gap: end of the line in KEGG                                                                                                                                                                                                                        | SAB      |
| meoh                    | Methanol                                  | Consumed only | Lysosome        | MEOHly                | gap removed; added transporter for lysosome transport                                                                                                                                                                                                           | ND       |
| mi3456p                 | 1D-myo-Inositol 3,4,5,6-tetrakisphosphate | Consumed only | Cytosol         | MI3456PK              | cannot remove gap; this molecule is currently a dead end                                                                                                                                                                                                        | ND       |
| 2mcacn                  | cis-2-Methyloaconitate                    | Consumed only | Cytosol         | MICITDr               | leave as gap; rxn is low confidence (physiological data from rat), model scope gap for now                                                                                                                                                                      | ND       |
| micit                   | methylisocitrate                          | Produced only | Cytosol         | MICITDr               | rxn has been removed (since it is incorrect) unfortunately it has been replaced with another (MICITDr) which does NOT remove the gap; this is a knowledge-base gap, not sure if methyl-cis-aconitate or methylisocitrate are physiologically relevant cpds, but | ND       |
| maltr                   | Maltotriose                               | Consumed only | Cytosol         | MLTG1                 | leave gap; protein has been functionally verified but could not find any information on its localization                                                                                                                                                        | ND       |
| mmcoa-S                 | (S)-Methylmalonyl-CoA                     | Consumed only | Cytosol         | MMCD                  | knowledge-based gap                                                                                                                                                                                                                                             | MM       |
| 4aabutn                 | 4-Acetamidobutanoate                      | Produced only | Cytosol         | NABTNO                | knowledge-base gap: not entirely clear how these metabolites are metabolized                                                                                                                                                                                    | SAB      |
| adprbp                  | ADP-ribose 2'-phosphate                   | Produced only | Cytosol         | NADPN                 | leave gap; exceeds model                                                                                                                                                                                                                                        | IT       |
| na1                     | Sodium                                    | Produced only | Golgi Apparatus | NA13_1g               | gap is due to transport reaction in Golgi (not needed now, but ok to leave in)                                                                                                                                                                                  | ND       |
| carn                    | L-Carnosine                               | Consumed only | Cytosol         | NBAHH_ir              | model-scope gap: carnosine metabolism not in current model                                                                                                                                                                                                      | SAB      |
| nmptrc                  | N-Methylputrescine                        | Consumed only | Cytosol         | NMPTRCOX              | modeling-gap: these compounds are found in mam. cells according to reference, but not in our model                                                                                                                                                              | SAB      |
| 1mpyr                   | 1-Methylpyrrolinium                       | Produced only | Cytosol         | NMPTRCOX              | modeling-gap: these compounds are found in mam. cells according to reference, but not in our model                                                                                                                                                              | SAB      |
| no                      | Nitric oxide                              | Produced only | Cytosol         | NOT                   | added diffusive transporter                                                                                                                                                                                                                                     | SAB      |
| xtp                     | XTP                                       | Consumed only | Cytosol         | NTPP11                | leave gap; knowledge gap                                                                                                                                                                                                                                        | IT       |
| o2s                     | Superoxide anion                          | Consumed only | Cytosol         | O2St                  | gap removed; added rxn for diffusion of o2s                                                                                                                                                                                                                     | ND       |
| o2s                     | Superoxide anion                          | Consumed only | Cytosol         | O2Stm                 | gap removed; added rxn for diffusion of o2s                                                                                                                                                                                                                     | ND       |
| o2s                     | Superoxide anion                          | Consumed only | Cytosol         | O2Stn                 | gap removed; added rxn for diffusion of o2s                                                                                                                                                                                                                     | ND       |
| o2s                     | Superoxide anion                          | Consumed only | Nucleus         | O2Stn                 | gap removed; added rxn for diffusion of o2s                                                                                                                                                                                                                     | ND       |
| o2s                     | Superoxide anion                          | Consumed only | Cytosol         | O2Stx                 | gap removed; added rxn for diffusion of o2s                                                                                                                                                                                                                     | ND       |
| o2s                     | Superoxide anion                          | Consumed only | Peroxisome      | O2Stx                 | gap removed; added rxn for diffusion of o2s                                                                                                                                                                                                                     | ND       |
| hnifedipine             | hydroxy nifedipine                        | Produced only | Cytosol         | P4503A4               | HNIFEDIPINEte                                                                                                                                                                                                                                                   | NJ       |
| pcollglys               | Procollagen L-lysine                      | Consumed only | Cytosol         | PCLYSOX               | model-scope gap                                                                                                                                                                                                                                                 | MM       |
| pcollg5hlys             | Procollagen 5-hydroxy-L-lysine            | Produced only | Cytosol         | PCLYSOX               | model-scope gap                                                                                                                                                                                                                                                 | MM       |
| pcrn                    | propionyl-carnitine                       | Produced only | Mitochondria    | PCRntm                | CSNAT3m removed and replaced with CSNAT2m, CSNAT3x made reversible                                                                                                                                                                                              | NJ       |
| pe_hs                   | phosphatidylethanolamine (homo sapiens)   | Produced only | Golgi Apparatus | PE_HStg               | pe_hs not used in any Golgi rxns right now                                                                                                                                                                                                                      | NJ       |
| 2pglyc                  | 2-Phosphoglycolate                        | Consumed only | Cytosol         | PGLYCP                | appears to be a knowledge base gap (INCOMPLETE!!)                                                                                                                                                                                                               | ND       |
| phyQ                    | Phylloquinone                             | Produced only | Cytosol         | PHYQt                 | leave gap; knowledge gap                                                                                                                                                                                                                                        | IT       |
| ppa                     | Propionate (n-C3:0)                       | Consumed only | Cytosol         | PPAt                  | gap removed; added rxn for extracellular -> cytosolic transport based on ref in thuy's mito model                                                                                                                                                               | ND       |
| ppa                     | Propionate (n-C3:0)                       | Consumed only | Cytosol         | PPAtm                 | gap removed; added rxn for extracellular -> cytosolic transport based on ref in thuy's mito model                                                                                                                                                               | ND       |
| 2hyoxplac               | 2-Hydroxyphenylacetate                    | Produced only | Cytosol         | PPOR                  | reaction based on KEGG                                                                                                                                                                                                                                          | SAB      |
| pro-D                   | D-Proline                                 | Consumed only | Lysosome        | PROD2rL               | knowledge-base gap: good evidence for inclusion regardless of gap                                                                                                                                                                                               | SAB      |
| pro-L                   | L-Proline                                 | Consumed only | Lysosome        | PRO2rL                | knowledge-base gap: good evidence for inclusion regardless of gap                                                                                                                                                                                               | SAB      |

| Metabolite Abbreviation | Metabolite Name                                                           | Gap Type      | Compartment           | Reaction Abbreviation | Notes                                                                                                                                                                                                                                                                                                                                                                              | Reviewer |
|-------------------------|---------------------------------------------------------------------------|---------------|-----------------------|-----------------------|------------------------------------------------------------------------------------------------------------------------------------------------------------------------------------------------------------------------------------------------------------------------------------------------------------------------------------------------------------------------------------|----------|
| ps_hs                   | phosphatidylserine (homo sapiens)                                         | Produced only | Endoplasmic Reticulum | PS_HSter              | ps_hs not used in any ER reactions currently                                                                                                                                                                                                                                                                                                                                       | NJ       |
| ps_hs                   | phosphatidylserine (homo sapiens)                                         | Produced only | Golgi Apparatus       | PS_HStg               | ps_hs not used in any Golgi rxns right now                                                                                                                                                                                                                                                                                                                                         | NJ       |
| pyam5p                  | Pyridoxamine 5'-phosphate                                                 | Produced only | Mitochondria          | PYAM5Ptm              | leave gap; exceeds model                                                                                                                                                                                                                                                                                                                                                           | IT       |
| pydx5p                  | Pyridoxal 5'-phosphate                                                    | Produced only | Mitochondria          | PYDX5Ptm              | leave gap; exceeds model                                                                                                                                                                                                                                                                                                                                                           | IT       |
| pylald                  | Perillyl aldehyde                                                         | Consumed only | Cytosol               | PYLALDOX              | knowledge-base gap: unknown where this metabolite goes in humans low priority subsystem also                                                                                                                                                                                                                                                                                       | SAB      |
| peracd                  | Perillic acid                                                             | Produced only | Cytosol               | PYLALDOX              | knowledge-base gap: unknown where this metabolite goes in humans low priority subsystem also                                                                                                                                                                                                                                                                                       | SAB      |
| retn                    | Retinoate                                                                 | Produced only | Nucleus               | RATn                  | leave gap; exceeds model                                                                                                                                                                                                                                                                                                                                                           | IT       |
| rbl-D                   | D-Ribulose                                                                | Consumed only | Cytosol               | RBK_D                 | gap removed; physiological evidence that D-ribulose can be taken up by cultured human fibroblasts                                                                                                                                                                                                                                                                                  | ND       |
| rbit                    | Ribitol                                                                   | Consumed only | Cytosol               | RBt                   | gap is due to extracellular transport reaction (not needed now, but ok to leave in)                                                                                                                                                                                                                                                                                                | ND       |
| retncoa                 | retinoyl CoA                                                              | Produced only | Cytosol               | RETNCOA               | Retinoyl-CoA is used in cell to retinoylate proteins --> I created demand function                                                                                                                                                                                                                                                                                                 | IT       |
| dmnoncoa                | 4,8 dimethylnonanoyl-CoA                                                  | Consumed only | Cytosol               | SCP22x                | Will leave gap at present time, sterol carrier protein can move fatty acid derivatives (usually steroid precursors) into different compartments, details about specific substrates and mechanisms not known                                                                                                                                                                        | NJ       |
| dtc                     | Dithiothreitol                                                            | Consumed only | Cytosol               | SELCSLY               | modeling gap: selenoamino acid metabolism is a low priority                                                                                                                                                                                                                                                                                                                        | SAB      |
| dtcOX                   | Oxidized dithiothreitol                                                   | Produced only | Cytosol               | SELCSLY               | modeling gap: selenoamino acid metabolism is a low priority                                                                                                                                                                                                                                                                                                                        | SAB      |
| selmeth                 | Selenomethionine                                                          | Consumed only | Cytosol               | SELMETAT              | knowledge-base gap: unknown where selmeth comes from in humans modeling evidence only, need a source of selenomethionine                                                                                                                                                                                                                                                           | SAB      |
| selnp                   | Selenophosphate                                                           | Produced only | Cytosol               | SELNPS                | model-scope gap: although there is not a great deal of information about selenoamino acid metabolism, this area is not particularly important to the initial model                                                                                                                                                                                                                 | SAB      |
| l2n2m2mn                | de-Fuc, reducing GlcNAc removed, de-Sia form of PA6 (w/o peptide linkage) | Produced only | Cytosol               | SIAASE                | leave reaction even though it causes gap; it's a redundant reaction since the primary rxn is in lysosome, but there's evidence it might be in cytosol                                                                                                                                                                                                                              | ND       |
| spc_hs                  | sphingosylphosphorylcholine (homo sapiens)                                | Produced only | Cytosol               | SMPD4                 | filled with SMPD4 and SPC_HSt - note that each one individually could have resolved the gap, however the evidence for both reactions was approximately the same                                                                                                                                                                                                                    | NJ       |
| spc_hs                  | sphingosylphosphorylcholine (homo sapiens)                                | Produced only | Cytosol               | SPC_HSt               | filled with SMPD4 and SPC_HSt - note that each one individually could have resolved the gap, however the evidence for both reactions was approximately the same                                                                                                                                                                                                                    | NJ       |
| spc_hs                  | sphingosylphosphorylcholine (homo sapiens)                                | Produced only | Cytosol               | SPHMDAc               | filled with SMPD4 and SPC_HSt - note that each one individually could have resolved the gap, however the evidence for both reactions was approximately the same                                                                                                                                                                                                                    | NJ       |
| fshoxkyn                | Formyl-5-hydroxykynurenamine                                              | Produced only | Cytosol               | SRTN23OX              | model-scope gap                                                                                                                                                                                                                                                                                                                                                                    | SAB      |
| nmthsrtn                | N-Methylserotonin                                                         | Produced only | Cytosol               | SRTNMTX               | knowledge-base gap: KEGG is the only evidence for this reaction                                                                                                                                                                                                                                                                                                                    | SAB      |
| dtprmn                  | dTDP-L-rhamnose                                                           | Produced only | Cytosol               | TDPDRR                | leave gap; according to Devlin, dTDP leads to UDP-GalNAc biosynthesis in mammals, but I can't find any evidence how this might occur                                                                                                                                                                                                                                               | ND       |
| thm                     | Thiamin                                                                   | Produced only | Mitochondria          | THMt2m                | leave gap; knowledge based: It is thought that this SLC19A2 is also responsible for the mitochondrial transport since cells of TRMA patients (thiamine-responsive megaloblastic anemia) in this gene show no mitochondrial transport of thiamine. Role of thiamine in mitochondria is not clear (therefore will be a gap) since there is no mitochondrial thiamine diphosphokinase | IT       |
| phom                    | O-Phospho-L-homoserine                                                    | Consumed only | Cytosol               | THRS                  | knowledge-based gap                                                                                                                                                                                                                                                                                                                                                                | MM       |
| q10                     | Ubiquinone-10                                                             | Consumed only | Cytosol               | TRDR2                 | leave gap knowledge gap: q10h2 Ubiquinol-10 Produced only Cytosol TRDR2 Miscellaneous [c]:h+nadh+q10-->nadh+q10h2 IT leave gap; knowledge gap:                                                                                                                                                                                                                                     | IT       |
| q10                     | Ubiquinone-10                                                             | Consumed only | Cytosol               | TRDR3                 | leave gap knowledge gap: q10h2 Ubiquinol-10 Produced only Cytosol TRDR3 Miscellaneous [c]:h+nadh+q10-->nadh+q10h2 IT leave gap; knowledge gap:                                                                                                                                                                                                                                     | IT       |
| tre                     | Trehalose                                                                 | Consumed only | Cytosol               | TREH                  | leave gap; rxn only based on sequence annotation                                                                                                                                                                                                                                                                                                                                   | ND       |
| ts3                     | Tachysterol 3                                                             | Produced only | Cytosol               | TS3                   | is not really a gap; conversion takes place when sufficient Vit D has been produced in skin cell - this mechanism avoids toxicity by Vit D-I included this reaction for completeness                                                                                                                                                                                               | IT       |
| txa2                    | Thromboxane A2                                                            | Consumed only | Cytosol               | TXA2e                 | removed gap, replaced TXA2e                                                                                                                                                                                                                                                                                                                                                        | NJ       |
| txa2                    | Thromboxane A2                                                            | Consumed only | Cytosol               | TXA2r                 | removed gap, replaced TXA2e                                                                                                                                                                                                                                                                                                                                                        | NJ       |
| udpg                    | UDPglucose                                                                | Produced only | Golgi Apparatus       | UDPGlcg               | gap is due to transporter rxn in Golgi (not needed now, but ok to leave in)                                                                                                                                                                                                                                                                                                        | ND       |
| udpacgal                | UDP-N-acetyl-D-galactosamine                                              | Produced only | Endoplasmic Reticulum | UGALNACter            | udpacgal is not used in any ER reactions currently                                                                                                                                                                                                                                                                                                                                 | NJ       |
| whststerone             | w hydroxy testosterone                                                    | Consumed only | Cytosol               | WHTTSTERONEEte        | WHTTSTERONEEte - unkown transporter and metabolism                                                                                                                                                                                                                                                                                                                                 | NJ       |

| Metabolite Abbreviation | Metabolite Name                                                   | Gap Type      | Compartment           | Reaction Abbreviation | Notes                                                                                                                                                                                                                                                       | Reviewer |
|-------------------------|-------------------------------------------------------------------|---------------|-----------------------|-----------------------|-------------------------------------------------------------------------------------------------------------------------------------------------------------------------------------------------------------------------------------------------------------|----------|
| xol7ah2                 | 3alpha,7alpha-Dihydroxy-5beta-cholestane                          | Produced only | Endoplasmic Reticulum | XOL7AH2tr             | no xol7ah2 reactions in ER right now                                                                                                                                                                                                                        | NJ       |
| xolest2_hs              | cholesterol ester (from FULLR2)                                   | Produced only | Cytosol               | XOLEST2te             | xolest2_hs produced extracellularly, currently no intracellular reaction in model w/ xol from R2                                                                                                                                                            | NJ       |
| xoltriol                | 3alpha,7alpha,12alpha-Trihydroxy-5beta-cholestane                 | Produced only | Endoplasmic Reticulum | XOLTRIOLtr            | no xoltriol reactions in ER right now                                                                                                                                                                                                                       | NJ       |
| 2mciit                  | 2-Methylcitrate                                                   | Produced only | Cytosol               | 2MCITt                | added transport rxn 2MCITt; methylcitrate is excreted in urine of patients who suffer from propionic acidemia (Weidman et al. 1979)                                                                                                                         | MM       |
| andrstrnglc             | androsterone glucuronide                                          | Consumed only | Cytosol               | ANDRSTRNGLCte         | ANDRSTRNGLCtr, ANDRSTRNGLCte                                                                                                                                                                                                                                | NJ       |
| bhb                     | (R)-3-Hydroxybutanoate                                            | Consumed only | Cytosol               | BHBt                  | gap removed; added extracellular transport rxn                                                                                                                                                                                                              | ND       |
| bz                      | Benzoate                                                          | Consumed only | Cytosol               | BZt                   | gap filled, added BZt                                                                                                                                                                                                                                       | NJ       |
| hom-L                   | L-Homoserine                                                      | Produced only | Cytosol               | HOMt4                 | knowledge-based gap; insufficient evidence to show that homoserine is an intermediate of the cystathione g-lyase rxn, which would have removed gap                                                                                                          | MM       |
| lipoate                 | Lipoate                                                           | Produced only | Cytosol               | LIPOTi                | leave gap for the moment; lipoate gets imported in cell, converted to dihydrolipoate and this compounds is the active form and gets directly exported again - unknown mechanism. Concrete reaction from lipoate to dihydrolipoate is not really clear to me | IT       |
| no                      | Nitric oxide                                                      | Produced only | Cytosol               | NOT                   | added diffusive transporter                                                                                                                                                                                                                                 | SAB      |
| o2s                     | Superoxide anion                                                  | Consumed only | Cytosol               | O2St                  | gap removed; added rxn for diffusion of o2s                                                                                                                                                                                                                 | ND       |
| phyQ                    | Phylloquinone                                                     | Produced only | Cytosol               | PHYQt                 | leave gap; knowledge gap                                                                                                                                                                                                                                    | IT       |
| ppa                     | Propionate (n-C3:0)                                               | Consumed only | Cytosol               | PPAt                  | gap removed; added rxn for extracellular -> cytosolic transport based on ref in thuy's mito model                                                                                                                                                           | ND       |
| rbit                    | Ribitol                                                           | Consumed only | Cytosol               | RBTt                  | gap is due to extracellular transport reaction (not needed now, but ok to leave in)                                                                                                                                                                         | ND       |
| spe_hs                  | sphingosylphosphorylcholine (homo sapiens)                        | Produced only | Cytosol               | SPC_HSt               | filled with SMPD4 and SPC_HSt - note that each one individually could have resolved the gap, however the evidence for both reactions was approximately the same                                                                                             | NJ       |
| txa2                    | Thromboxane A2                                                    | Consumed only | Cytosol               | TXA2te                | removed gap, replaced TXA2te                                                                                                                                                                                                                                | NJ       |
| whststerone             | w hydroxy testosterone                                            | Consumed only | Cytosol               | WHTSTSTERONEte        | WHTSTSTERONEte - unknown transporter and metabolism                                                                                                                                                                                                         | NJ       |
| xolest2_hs              | cholesterol ester (from FULLR2)                                   | Produced only | Cytosol               | XOLEST2te             | xolest2_hs produced extracellularly, currently no intracellular reaction in model w/ xol from R2                                                                                                                                                            | NJ       |
| gncore1                 | GlcNAc-alpha-1,4-Core 1                                           | Produced only | Golgi Apparatus       | A4GNT1g               | gap ok; this is a core structure can undergo tissue-specific, developmentally regulated, or protein-specific modifications (which are not included in this model)                                                                                           | ND       |
| gncore2                 | GlcNAc-alpha-1,4-Core 2                                           | Produced only | Golgi Apparatus       | A4GNT2g               | gap ok; this is a core structure can undergo tissue-specific, developmentally regulated, or protein-specific modifications (which are not included in this model)                                                                                           | ND       |
| chsterol                | Cholesterol                                                       | Consumed only | Golgi Apparatus       | CHSTEROLg             | By IT shows transport between golgi and plasma membrane                                                                                                                                                                                                     | NJ       |
| core5                   | Core 5                                                            | Produced only | Golgi Apparatus       | CORE5GTg              | gap ok; this is a core structure can undergo tissue-specific, developmentally regulated, or protein-specific modifications (which are not included in this model)                                                                                           | ND       |
| core7                   | Core 7                                                            | Produced only | Golgi Apparatus       | CORE7GTg              | gap ok; this is a core structure can undergo tissue-specific, developmentally regulated, or protein-specific modifications (which are not included in this model)                                                                                           | ND       |
| core8                   | Core 8                                                            | Produced only | Golgi Apparatus       | CORE8GTg              | gap ok; this is a core structure can undergo tissue-specific, developmentally regulated, or protein-specific modifications (which are not included in this model)                                                                                           | ND       |
| glc1man                 | glucose-1,3-mannose oligosaccharide                               | Produced only | Golgi Apparatus       | ENMAN1g               | gap OK; as far as I understand, these are markers for mannosidase activity in Golgi so presumably remain there                                                                                                                                              | ND       |
| glc2man                 | (2)[glucose-1,3]-mannose oligosaccharide                          | Produced only | Golgi Apparatus       | ENMAN2g               | gap OK; as far as I understand, these are markers for mannosidase activity in Golgi so presumably remain there                                                                                                                                              | ND       |
| glc3man                 | glucose-1,2-(2)[glucose-1,3]-mannose oligosaccharide              | Produced only | Golgi Apparatus       | ENMAN3g               | gap OK; as far as I understand, these are markers for mannosidase activity in Golgi so presumably remain there                                                                                                                                              | ND       |
| glc1man                 | glucose-1,3-mannose oligosaccharide                               | Produced only | Golgi Apparatus       | ENMAN4g               | gap OK; as far as I understand, these are markers for mannosidase activity in Golgi so presumably remain there                                                                                                                                              | ND       |
| glc1man                 | glucose-1,3-mannose oligosaccharide                               | Produced only | Golgi Apparatus       | ENMAN5g               | gap OK; as far as I understand, these are markers for mannosidase activity in Golgi so presumably remain there                                                                                                                                              | ND       |
| glc1man                 | glucose-1,3-mannose oligosaccharide                               | Produced only | Golgi Apparatus       | ENMAN6g               | gap OK; as far as I understand, these are markers for mannosidase activity in Golgi so presumably remain there                                                                                                                                              | ND       |
| Ser/Thr                 | protein-linked serine or threonine residue (O-glycosylation site) | Consumed only | Golgi Apparatus       | GALNTg                | gap ok; represents peptide binding site for O-glycans                                                                                                                                                                                                       | ND       |
| galside_hs              | galactocerebroside (homo sapiens)                                 | Consumed only | Cytosol               | GALSIDEt              | gap resolved added GALSIDEt                                                                                                                                                                                                                                 | NJ       |
| coa                     | Coenzyme A                                                        | Produced only | Golgi Apparatus       | GAO1g                 | CHAT is complete (in cytosol)                                                                                                                                                                                                                               | NJ       |
| coa                     | Coenzyme A                                                        | Produced only | Golgi Apparatus       | GAO2g                 | CHAT is complete (in cytosol)                                                                                                                                                                                                                               | NJ       |
| k                       | potassium                                                         | Produced only | Golgi Apparatus       | Kt3g                  | gap is due to transporter rxn in Golgi (not needed now, but ok to leave in)                                                                                                                                                                                 | ND       |

| Metabolite Abbreviation | Metabolite Name                                                                                            | Gap Type      | Compartment     | Reaction Abbreviation | Notes                                                                                                                                                                                                                                                                                                                                   | Reviewer |
|-------------------------|------------------------------------------------------------------------------------------------------------|---------------|-----------------|-----------------------|-----------------------------------------------------------------------------------------------------------------------------------------------------------------------------------------------------------------------------------------------------------------------------------------------------------------------------------------|----------|
| n5m2masn                | ((N-acetyl-D-glucosaminy)5-(alpha-D-mannosyl)2-beta-D-mannosyl-diacetylchitobiosyl)-L-asparagine (protein) | Produced only | Golgi Apparatus | M16N4Tg               | gap OK; leave as dead-end of N-glycan synthesis since its degradation is not included in model                                                                                                                                                                                                                                          | ND       |
| f1a                     | F1alpha                                                                                                    | Produced only | Golgi Apparatus | N4Tg                  | gap ok; this is a core structure can undergo tissue-specific, developmentally regulated, or protein-specific modifications (which are not included in this model)                                                                                                                                                                       | ND       |
| na1                     | Sodium                                                                                                     | Produced only | Golgi Apparatus | NA13_1g               | gap is due to transport reaction in Golgi (not needed now, but ok to leave in)                                                                                                                                                                                                                                                          | ND       |
| camp                    | cAMP                                                                                                       | Consumed only | Golgi Apparatus | PDE1g                 | exceeds model; leave gap                                                                                                                                                                                                                                                                                                                | IT       |
| amp                     | AMP                                                                                                        | Produced only | Golgi Apparatus | PDE1g                 | exceeds model; leave gap since cAMP is gap too                                                                                                                                                                                                                                                                                          | IT       |
| 35cgmp                  | 3',5'-Cyclic GMP                                                                                           | Consumed only | Golgi Apparatus | PDE4g                 | exceeds model; leave gap                                                                                                                                                                                                                                                                                                                | IT       |
| pe_hs                   | phosphatidylethanolamine (homo sapiens)                                                                    | Produced only | Golgi Apparatus | PE_HS1g               | pe_hs not used in any Golgi rxns right now                                                                                                                                                                                                                                                                                              | NJ       |
| ps_hs                   | phosphatidylserine (homo sapiens)                                                                          | Produced only | Golgi Apparatus | PS_HS1g               | ps_hs not used in any Golgi rxns right now                                                                                                                                                                                                                                                                                              | NJ       |
| udpg                    | UDPglucose                                                                                                 | Produced only | Golgi Apparatus | UDPG1g                | gap is due to transporter rxn in Golgi (not needed now, but ok to leave in)                                                                                                                                                                                                                                                             | ND       |
| 3amp                    | 3'-AMP                                                                                                     | Consumed only | Lysosome        | 3NTD7l                | nucleotide monophosphates come from DNA and RNA degradation in lysosome (by acid exonuclease and acid ribonuclease). Will be dead-end in model as well as their efflux transport systems.                                                                                                                                               | IT       |
| pi                      | Phosphate                                                                                                  | Produced only | Lysosome        | 3NTD7l                | DNA and RNA degradation takes place in the Lysosome. The associated reactions are dead-ends in the model since we do not model DNA, RNA. Thus, pi coming from these dead-end reaction can easily stay a gap for the moment since it will not effect the model capacities but a pi-transport system from/to Lysosome is not known to me. | IT       |
| 4abut                   | 4-Aminobutanoate                                                                                           | Consumed only | Lysosome        | ABUT2rL               | knowledge-base gap                                                                                                                                                                                                                                                                                                                      | SAB      |
| acgbgbside_hs           | beta GalNAc globoside (homo sapiens)                                                                       | Produced only | Lysosome        | ACGBGBSIDE1l          | gap removed by single reaction addition: NAGA1by added in analogy to NAGA1y (no real evidence that this occurs in vivo)                                                                                                                                                                                                                 | NJ       |
| ade                     | Adenine                                                                                                    | Consumed only | Lysosome        | ADE1l                 | leave gap; knowledge gap: at least i have no idea of the function of adenine in lysosome but uptake was studied by PMID: 2925670                                                                                                                                                                                                        | IT       |
| ala-L                   | L-Alanine                                                                                                  | Consumed only | Lysosome        | ALA2rL                | model-scope gap                                                                                                                                                                                                                                                                                                                         | SAB      |
| chsterol                | Cholesterol                                                                                                | Consumed only | Lysosome        | CHSTEROL1l            | Assumed flip-flop mechanism - if not used in lysosome currently it's okay                                                                                                                                                                                                                                                               | NJ       |
| ala-D                   | D-Alanine                                                                                                  | Consumed only | Lysosome        | DALA2rL               | knowledge-base gap: how does alanine get into the lysosome--good evidence for inclusion regardless of gap                                                                                                                                                                                                                               | SAB      |
| fald                    | Formaldehyde                                                                                               | Produced only | Lysosome        | FALDtly               | gap removed; added transporter for lysosomal transport                                                                                                                                                                                                                                                                                  | ND       |
| galside_hs              | galactocerebroside (homo sapiens)                                                                          | Consumed only | Cytosol         | GALSIDE1l             | gap resolved added GALSIDE1l                                                                                                                                                                                                                                                                                                            | NJ       |
| gly                     | Glycine                                                                                                    | Consumed only | Lysosome        | GLY2rL                | knowledge-base gap: how does glycine get into the lysosome--good evidence for inclusion regardless of gap                                                                                                                                                                                                                               | SAB      |
| h2o2                    | Hydrogen peroxide                                                                                          | Consumed only | Lysosome        | H2O2tly               | gap removed; found physiological evidence that can diffuse across compartments                                                                                                                                                                                                                                                          | ND       |
| hxan                    | Hypoxanthine                                                                                               | Consumed only | Lysosome        | HXANtly               | Gene associated--IT's addition                                                                                                                                                                                                                                                                                                          | SAB      |
| idouur                  | L-Iduronate                                                                                                | Consumed only | Cytosol         | IDOURtly              | knowledge gap: makes sense that idour is transported to cytosol (to maintain osmotic balance in lysosome) but I can't find any specific rxn which consume it there                                                                                                                                                                      | ND       |
| ins                     | Inosine                                                                                                    | Consumed only | Lysosome        | INS1l                 | Gene associated--IT's addition                                                                                                                                                                                                                                                                                                          | SAB      |
| pi                      | Phosphate                                                                                                  | Produced only | Lysosome        | LAPCOA1               | DNA and RNA degradation takes place in the Lysosome. The associated reactions are dead-ends in the model since we do not model DNA, RNA. Thus, pi coming from these dead-end reaction can easily stay a gap for the moment since it will not effect the model capacities but a pi-transport system from/to Lysosome is not known to me. | IT       |
| lcts                    | Lactose                                                                                                    | Consumed only | Cytosol         | LCTS1l                | gap removed; have decided to remove this reaction since it probably doesn't exist in the cytosol -- I don't want to associate it with the lysosomal complex until it has been experimentally verified                                                                                                                                   | ND       |
| meoh                    | Methanol                                                                                                   | Consumed only | Lysosome        | MEOHtly               | gap removed; added transporter for lysosome transport                                                                                                                                                                                                                                                                                   | ND       |
| maltr                   | Maltotriose                                                                                                | Consumed only | Lysosome        | MLTG1ly               | leave gap; this rxn is valid in vivo, maltr usually arises from glycogen deg, but does not appear in our network for modeling reasons (only made representative structure for glycogen and maltr doesn't happen to be one of its degradation products)                                                                                  | ND       |
| acgbgbside_hs           | beta GalNAc globoside (homo sapiens)                                                                       | Produced only | Lysosome        | NAGA1by               | gap removed by single reaction addition: NAGA1by added in analogy to NAGA1y (no real evidence that this occurs in vivo)                                                                                                                                                                                                                 | NJ       |
| ump                     | UMP                                                                                                        | Consumed only | Lysosome        | NTD2l                 | nucleotide monophosphates come from DNA and RNA degradation in lysosome (by acid exonuclease and acid ribonuclease). Will be dead-end in model as well as their efflux transport systems.                                                                                                                                               | IT       |
| pi                      | Phosphate                                                                                                  | Produced only | Lysosome        | NTD2l                 | DNA and RNA degradation takes place in the Lysosome. The associated reactions are dead-ends in the model since we do not model DNA, RNA. Thus, pi coming from these dead-end reaction can easily stay a gap for the moment since it will not effect the model capacities but a pi-transport system from/to Lysosome is not known to me. | IT       |



| Metabolite Abbreviation | Metabolite Name   | Gap Type      | Compartment | Reaction Abbreviation | Notes                                                                                                                                                                                                                                                                                                                                   | Reviewer |
|-------------------------|-------------------|---------------|-------------|-----------------------|-----------------------------------------------------------------------------------------------------------------------------------------------------------------------------------------------------------------------------------------------------------------------------------------------------------------------------------------|----------|
| dcmp                    | dCMP              | Consumed only | Lysosome    | NTD31                 | nucleotide monophosphates come from DNA and RNA degradation in lysosome (by acid exonuclease and acid ribonuclease). Will be dead-end in model as well as their efflux transport systems.                                                                                                                                               | IT       |
| dct                     | Deoxycytidine     | Produced only | Lysosome    | NTD31                 | nucleotide monophosphates come from DNA and RNA degradation in lysosome (by acid exonuclease and acid ribonuclease). Will be dead-end in model as well as their efflux transport systems.                                                                                                                                               | IT       |
| pi                      | Phosphate         | Produced only | Lysosome    | NTD31                 | DNA and RNA degradation takes place in the Lysosome. The associated reactions are dead-ends in the model since we do not model DNA, RNA. Thus, pi coming from these dead-end reaction can easily stay a gap for the moment since it will not effect the model capacities but a pi-transport system from/to Lysosome is not known to me. | IT       |
| cmp                     | CMP               | Consumed only | Lysosome    | NTD41                 | nucleotide monophosphates come from DNA and RNA degradation in lysosome (by acid exonuclease and acid ribonuclease). Will be dead-end in model as well as their efflux transport systems.                                                                                                                                               | IT       |
| pi                      | Phosphate         | Produced only | Lysosome    | NTD41                 | DNA and RNA degradation takes place in the Lysosome. The associated reactions are dead-ends in the model since we do not model DNA, RNA. Thus, pi coming from these dead-end reaction can easily stay a gap for the moment since it will not effect the model capacities but a pi-transport system from/to Lysosome is not known to me. | IT       |
| dtmp                    | dTMP              | Consumed only | Lysosome    | NTD51                 | nucleotide monophosphates come from DNA and RNA degradation in lysosome (by acid exonuclease and acid ribonuclease). Will be dead-end in model as well as their efflux transport systems.                                                                                                                                               | IT       |
| pi                      | Phosphate         | Produced only | Lysosome    | NTD51                 | DNA and RNA degradation takes place in the Lysosome. The associated reactions are dead-ends in the model since we do not model DNA, RNA. Thus, pi coming from these dead-end reaction can easily stay a gap for the moment since it will not effect the model capacities but a pi-transport system from/to Lysosome is not known to me. | IT       |
| damp                    | dAMP              | Consumed only | Lysosome    | NTD61                 | nucleotide monophosphates come from DNA and RNA degradation in lysosome (by acid exonuclease and acid ribonuclease). Will be dead-end in model as well as their efflux transport systems.                                                                                                                                               | IT       |
| dad-2                   | Deoxyadenosine    | Produced only | Lysosome    | NTD61                 | nucleotide monophosphates come from DNA and RNA degradation in lysosome (by acid exonuclease and acid ribonuclease). Will be dead-end in model as well as their efflux transport systems.                                                                                                                                               | IT       |
| pi                      | Phosphate         | Produced only | Lysosome    | NTD61                 | DNA and RNA degradation takes place in the Lysosome. The associated reactions are dead-ends in the model since we do not model DNA, RNA. Thus, pi coming from these dead-end reaction can easily stay a gap for the moment since it will not effect the model capacities but a pi-transport system from/to Lysosome is not known to me. | IT       |
| amp                     | AMP               | Consumed only | Lysosome    | NTD71                 | nucleotide monophosphates come from DNA and RNA degradation in lysosome (by acid exonuclease and acid ribonuclease). Will be dead-end in model as well as their efflux transport systems.                                                                                                                                               | IT       |
| pi                      | Phosphate         | Produced only | Lysosome    | NTD71                 | DNA and RNA degradation takes place in the Lysosome. The associated reactions are dead-ends in the model since we do not model DNA, RNA. Thus, pi coming from these dead-end reaction can easily stay a gap for the moment since it will not effect the model capacities but a pi-transport system from/to Lysosome is not known to me. | IT       |
| dgmp                    | dGMP              | Consumed only | Lysosome    | NTD81                 | nucleotide monophosphates come from DNA and RNA degradation in lysosome (by acid exonuclease and acid ribonuclease). Will be dead-end in model as well as their efflux transport systems.                                                                                                                                               | IT       |
| dgsn                    | Deoxyguanosine    | Produced only | Lysosome    | NTD81                 | nucleotide monophosphates come from DNA and RNA degradation in lysosome (by acid exonuclease and acid ribonuclease). Will be dead-end in model as well as their efflux transport systems.                                                                                                                                               | IT       |
| pi                      | Phosphate         | Produced only | Lysosome    | NTD81                 | DNA and RNA degradation takes place in the Lysosome. The associated reactions are dead-ends in the model since we do not model DNA, RNA. Thus, pi coming from these dead-end reaction can easily stay a gap for the moment since it will not effect the model capacities but a pi-transport system from/to Lysosome is not known to me. | IT       |
| gmp                     | GMP               | Consumed only | Lysosome    | NTD91                 | nucleotide monophosphates come from DNA and RNA degradation in lysosome (by acid exonuclease and acid ribonuclease). Will be dead-end in model as well as their efflux transport systems.                                                                                                                                               | IT       |
| pi                      | Phosphate         | Produced only | Lysosome    | NTD91                 | DNA and RNA degradation takes place in the Lysosome. The associated reactions are dead-ends in the model since we do not model DNA, RNA. Thus, pi coming from these dead-end reaction can easily stay a gap for the moment since it will not effect the model capacities but a pi-transport system from/to Lysosome is not known to me. | IT       |
| h2o2                    | Hydrogen peroxide | Consumed only | Lysosome    | PRDX1                 | gap removed; found physiological evidence that can diffuse across compartments                                                                                                                                                                                                                                                          | ND       |
| meoh                    | Methanol          | Consumed only | Lysosome    | PRDX1                 | gap removed; added transporter for lysosome transport                                                                                                                                                                                                                                                                                   | ND       |
| fald                    | Formaldehyde      | Produced only | Lysosome    | PRDX1                 | gap removed; added transporter for lysosomal transport                                                                                                                                                                                                                                                                                  | ND       |

| Metabolite Abbreviation | Metabolite Name                              | Gap Type      | Compartment  | Reaction Abbreviation | Notes                                                                                                                                                                                                                                                                                                                                                                                    | Reviewer |
|-------------------------|----------------------------------------------|---------------|--------------|-----------------------|------------------------------------------------------------------------------------------------------------------------------------------------------------------------------------------------------------------------------------------------------------------------------------------------------------------------------------------------------------------------------------------|----------|
| pro-D                   | D-Proline                                    | Consumed only | Lysosome     | PROD1rL               | knowledge-base gap: good evidence for inclusion regardless of gap                                                                                                                                                                                                                                                                                                                        | SAB      |
| pro-L                   | L-Proline                                    | Consumed only | Lysosome     | PRO1rL                | knowledge-base gap: good evidence for inclusion regardless of gap                                                                                                                                                                                                                                                                                                                        | SAB      |
| 1a2425thvitd2           | 1-alpha,24R,25-Trihydroxyvitamin D2          | Produced only | Mitochondria | 1a,24,25VITD2Hm       | resolved gap; included ER import                                                                                                                                                                                                                                                                                                                                                         | IT       |
| 1a2425thvitd3           | 1-alpha,24R,25-Trihydroxyvitamin D3          | Produced only | Mitochondria | 1a,24,25VITD3Hm       | resolved gap; included ER and cytosolic export                                                                                                                                                                                                                                                                                                                                           | IT       |
| 1a2425thvitd2           | 1-alpha,24R,25-Trihydroxyvitamin D2          | Produced only | Mitochondria | 1a,25VITD2Hm          | resolved gap; included ER import                                                                                                                                                                                                                                                                                                                                                         | IT       |
| 1a2425thvitd3           | 1-alpha,24R,25-Trihydroxyvitamin D3          | Produced only | Mitochondria | 1a,25VITD3Hm          | resolved gap; included ER and cytosolic export                                                                                                                                                                                                                                                                                                                                           | IT       |
| 3hbcoa-R                | (R)-3-Hydroxybutanoyl-CoA                    | Produced only | Mitochondria | 3HBCDm                | Reactions not currently used since lumped FA ox rxns used, in future updates if FA ox is broken up they will be used                                                                                                                                                                                                                                                                     | NJ       |
| 5hoxindact              | 5-Hydroxyindoleacetaldehyde                  | Consumed only | Mitochondria | 5HOXINDACTOXm         | knowledge-base gap: unknown if/how molecules are transported                                                                                                                                                                                                                                                                                                                             | SAB      |
| 5hoxindoa               | 5-Hydroxyindoleacetate                       | Produced only | Mitochondria | 5HOXINDACTOXm         | knowledge-base gap: unknown if/how molecules are transported                                                                                                                                                                                                                                                                                                                             | SAB      |
| acglu                   | N-Acetyl-L-glutamate                         | Produced only | Mitochondria | ACGSm                 | knowledge-base gap                                                                                                                                                                                                                                                                                                                                                                       | SAB      |
| adprib                  | ADPribose                                    | Consumed only | Mitochondria | ADPRDPm               | leave gap; exceeds model                                                                                                                                                                                                                                                                                                                                                                 | IT       |
| r5p                     | alpha-D-Ribose 5-phosphate                   | Produced only | Mitochondria | ADPRDPm               | leave gap; r5p is normally metabolized by pentose-phosphate pathway in cytosol. Since adprib, the substrate of the reaction, is also a gap, I will not include a mitochondrial transport reaction just for model purpose                                                                                                                                                                 | IT       |
| ptrc                    | Putrescine                                   | Produced only | Mitochondria | AGMTm                 | Localization data for reactions causes this gap--OK                                                                                                                                                                                                                                                                                                                                      | SAB      |
| acg5p                   | N-Acetyl-L-glutamyl 5-phosphate              | Consumed only | Mitochondria | AGPRim                | knowledge-base gap: also reaction isn't so certain                                                                                                                                                                                                                                                                                                                                       | SAB      |
| acg5sa                  | N-Acetyl-L-glutamate 5-semialdehyde          | Produced only | Mitochondria | AGPRim                | knowledge-base gap: also reaction isn't so certain                                                                                                                                                                                                                                                                                                                                       | SAB      |
| id3acald                | Indole-3-acetaldehyde                        | Consumed only | Mitochondria | ALDD20xm              | model-scope gap                                                                                                                                                                                                                                                                                                                                                                          | SAB      |
| ind3ac                  | Indole-3-acetate                             | Produced only | Mitochondria | ALDD20xm              | model-scope gap                                                                                                                                                                                                                                                                                                                                                                          | SAB      |
| bampald                 | beta-Aminopropion aldehyde                   | Consumed only | Mitochondria | BAMPPALDOXm           | knowledge-base gap: not known how/if metabolites get into and out of mitochondria                                                                                                                                                                                                                                                                                                        | SAB      |
| bhb                     | (R)-3-Hydroxybutanoate                       | Consumed only | Cytosol      | BHBtm                 | gap removed; added extracellular transport rxn                                                                                                                                                                                                                                                                                                                                           | ND       |
| c2m26dcoa               | cis-2-Methyl-5-isopropylhexa-2,5-dienoyl-CoA | Consumed only | Mitochondria | C2M26DCOAhLm          | model-scope gap: unimportant                                                                                                                                                                                                                                                                                                                                                             | SAB      |
| cb12                    | Cob(II)alamin                                | Produced only | Mitochondria | CBL2tm                | leave for the moment --> unfinished PW                                                                                                                                                                                                                                                                                                                                                   | IT       |
| cb11                    | Cob(I)alamin                                 | Consumed only | Mitochondria | CBLATm                | leave for the moment --> unfinished PW                                                                                                                                                                                                                                                                                                                                                   | IT       |
| adocbl                  | Adenosylcobalamin                            | Produced only | Mitochondria | CBLATm                | leave for the moment --> unfinished PW                                                                                                                                                                                                                                                                                                                                                   | IT       |
| cca_d3                  | Calcitric acid (D3)                          | Consumed only | Mitochondria | CCA_D3tm              | knowledge gap: reactions as well as enzymes for vit D degradation are unknown                                                                                                                                                                                                                                                                                                            | IT       |
| chsterol                | Cholesterol                                  | Consumed only | Lysosome     | CHSTEROL1             | Assumed flip-flop mechanism - if not used in lysosome currently it's okay                                                                                                                                                                                                                                                                                                                | NJ       |
| clpndcoa                | clupanodonyl CoA                             | Produced only | Mitochondria | CLPNDCPT2             | was not removed - technically/physiologically the reaction CAN occur however long chain fatty acids (>C22) won't be oxidized in the mitochondria so it is unlikely to be used                                                                                                                                                                                                            | NJ       |
| pcrn                    | propionyl-carnitine                          | Produced only | Mitochondria | CSNAT2m               | CSNAT3m removed and replaced with CSNAT2m, CSNAT3x made reversible                                                                                                                                                                                                                                                                                                                       | NJ       |
| cys-L                   | L-Cysteine                                   | Consumed only | Mitochondria | CYSTAm                | knowledge-based gap                                                                                                                                                                                                                                                                                                                                                                      | MM       |
| mercppyr                | Mercaptopyruvate                             | Produced only | Mitochondria | CYSTAm                | knowledge-based gap                                                                                                                                                                                                                                                                                                                                                                      | MM       |
| 3aib-D                  | D-3-Amino-isobutanoate                       | Consumed only | Mitochondria | D3AIBtm               | gap eliminated; MM added mitochondrial transport reaction (3AIBtm)                                                                                                                                                                                                                                                                                                                       | IT       |
| dd2coa                  | trans-Dodec-2-enoyl-CoA                      | Consumed only | Mitochondria | DC1m                  | Reactions not currently used since lumped FA ox rxns used, in future updates if FA ox is broken up they will be used                                                                                                                                                                                                                                                                     | NJ       |
| dd3coa                  | 3-dodecenoyl CoA                             | Produced only | Mitochondria | DC1m                  | Reactions not currently used since lumped FA ox rxns used, in future updates if FA ox is broken up they will be used                                                                                                                                                                                                                                                                     | NJ       |
| dcyt                    | Deoxycytidine                                | Consumed only | Mitochondria | DCK1m                 | leave gap for the moment; i discovered the reaction (DCK1m) during the gap filling process but i could not find any other evidence how dcyt comes into the mitochondria. Dcmp will certainly originate from mtDNA. The reaction is right now reversible but i think that the most probable direction is towards the dcmp production which leaves the question where dcyt is coming from. | IT       |
| dcmp                    | dCMP                                         | Produced only | Mitochondria | DCK1m                 | leave gap for the moment; i discovered the reaction (DCK1m) during the gap filling process but i could not find any other evidence how dcyt comes into the mitochondria. Dcmp will certainly originate from mtDNA. The reaction is right now reversible but i think that the most probable direction is towards the dcmp production which leaves the question where dcyt is coming from. | IT       |
| tdcoa                   | Tetradecanoyl-CoA (n-C14:0CoA)               | Produced only | Mitochondria | FAOXC140              | FAOXC140 added                                                                                                                                                                                                                                                                                                                                                                           | NJ       |
| glyclt                  | Glycolate                                    | Produced only | Mitochondria | GCALDDm               | leave gap; can't find any refs as to what happens to mitochondrial glycolate -- could be transported to cytosol, but no evidence for this nor need for its transport in model                                                                                                                                                                                                            | ND       |
| ser-L                   | L-Serine                                     | Consumed only | Mitochondria | GHMT2m                | knowledge-based gap                                                                                                                                                                                                                                                                                                                                                                      | MM       |
| 3hmelys                 | 3-Hydroxy-N6,N6,N6-trimethyl-L-lysine        | Consumed only | Mitochondria | GHMT3m                | knowledge-based gap                                                                                                                                                                                                                                                                                                                                                                      | MM       |

| Metabolite Abbreviation | Metabolite Name                      | Gap Type      | Compartment  | Reaction Abbreviation | Notes                                                                                                                                                                                                                                                                                                                                     | Reviewer |
|-------------------------|--------------------------------------|---------------|--------------|-----------------------|-------------------------------------------------------------------------------------------------------------------------------------------------------------------------------------------------------------------------------------------------------------------------------------------------------------------------------------------|----------|
| 4tmeabut                | 4-Trimethylammoniumbutanal           | Produced only | Mitochondria | GHMT3m                | knowledge-based gap                                                                                                                                                                                                                                                                                                                       | MM       |
| glac                    | D-glucurono-6,3-lactone              | Consumed only | Mitochondria | GLACOm                | leave gap; this reaction was added based on only modeling evidence                                                                                                                                                                                                                                                                        | ND       |
| glcr                    | D-Glucarate                          | Produced only | Mitochondria | GLACOm                | ok; glucuric acid seems to be a dead end metabolite [Marsh, Carb Res 1986]                                                                                                                                                                                                                                                                | ND       |
| glyclt                  | Glycolate                            | Produced only | Mitochondria | GLYCLTDym             | leave gap; can't find any refs as to what happens to mitochondrial glycolate -- could be transported to cytosol, but no evidence for this nor need for its transport in model                                                                                                                                                             | ND       |
| lgt-S                   | (R)-S-Lactoylglutathione             | Consumed only | Mitochondria | GLYOXm                | gap ok; function of the mitochondrial pool of glyoxalase II activity is unknown                                                                                                                                                                                                                                                           | ND       |
| alpa_hs                 | lysophosphatidic acid (homo sapiens) | Produced only | Mitochondria | GPAMm_hs              | knowledge gap, pathway complete in cytosol - see PMID: 10514455, suggests that pa_hs crosses mit membrane (rat)                                                                                                                                                                                                                           | NJ       |
| h2co3                   | carbonic acid                        | Produced only | Mitochondria | H2CO3D2m              | genes and good evidence, passed to NCD                                                                                                                                                                                                                                                                                                    | SAB      |
| h2co3                   | carbonic acid                        | Produced only | Mitochondria | H2CO3Dm               | genes and good evidence, passed to NCD                                                                                                                                                                                                                                                                                                    | SAB      |
| hexccoa                 | Hexacosanoyl-CoA (n-C26:0CoA)        | Produced only | Mitochondria | HEXCCPT2              | was not removed - technically/physiologically the reaction CAN occur however long chain fatty acids (>C22) won't be oxidized in the mitochondria so it is unlikely to be used                                                                                                                                                             | NJ       |
| 4hpro-LT                | trans-4-Hydroxy-L-proline            | Consumed only | Mitochondria | HPROxm                | model-scope gap: no collagen in model currently                                                                                                                                                                                                                                                                                           | SAB      |
| hpyr                    | Hydroxypyruvate                      | Consumed only | Mitochondria | HPYRDCm               | true knowledge gap; there are very few reports describing the properties of this enzyme, none in human tissues                                                                                                                                                                                                                            | ND       |
| im4act                  | Imidazole-4-acetaldehyde             | Consumed only | Mitochondria | IMACTD_m              | knowledge-base gap: not known how this gets to mitochondria                                                                                                                                                                                                                                                                               | SAB      |
| im4ac                   | Imidazole-4-acetate                  | Produced only | Mitochondria | IMACTD_m              | model-scope gap: potential end-product                                                                                                                                                                                                                                                                                                    | SAB      |
| imp                     | IMP                                  | Produced only | Mitochondria | INSKm                 | what the hell is happening with this??? No evidence for biosynthetic pathway of atp/gtp from imp in mito                                                                                                                                                                                                                                  | IT       |
| lald-D                  | D-Lactaldehyde                       | Consumed only | Mitochondria | LCADI_Dm              | knowledge gap; this step is not well characterized in humans                                                                                                                                                                                                                                                                              | ND       |
| lald-L                  | L-Lactaldehyde                       | Consumed only | Mitochondria | LCADIm                | knowledge gap; this step is not well characterized in humans                                                                                                                                                                                                                                                                              | ND       |
| Lcyst                   | L-Cysteate                           | Consumed only | Mitochondria | LCYSTATm              | knowledge-based gap                                                                                                                                                                                                                                                                                                                       | MM       |
| lgccoa                  | lignoceryl coenzyme A                | Produced only | Mitochondria | LGNCCT2               | was not removed - technically/physiologically the reaction CAN occur however long chain fatty acids (>C22) won't be oxidized in the mitochondria so it is unlikely to be used                                                                                                                                                             | NJ       |
| ACP                     | acyl carrier protein                 | Consumed only | Mitochondria | MCOATAm               | FA synthesis is lumped, so activation w/ ACP will not be utilized at this point, this may be useful in a future version of the reconstruction if FAS is 'unlumped'                                                                                                                                                                        | NJ       |
| malACP                  | Malonyl-[acyl-carrier protein]       | Produced only | Mitochondria | MCOATAm               | FA synthesis is lumped, so activation w/ ACP will not be utilized at this point, this may be useful in a future version of the reconstruction if FAS is 'unlumped'                                                                                                                                                                        | NJ       |
| n4abutn                 | N4-Acetylamino butanal               | Consumed only | Mitochondria | NABTNom               | knowledge-base gap: not entirely clear how these metabolites are metabolized                                                                                                                                                                                                                                                              | SAB      |
| 4aabutn                 | 4-Acetamidobutanate                  | Produced only | Mitochondria | NABTNom               | knowledge-base gap: not entirely clear how these metabolites are metabolized                                                                                                                                                                                                                                                              | SAB      |
| didp                    | dIDP                                 | Consumed only | Mitochondria | NDPK10m               | leave gap; knowledge gap                                                                                                                                                                                                                                                                                                                  | IT       |
| ditp                    | dITP                                 | Produced only | Mitochondria | NDPK10m               | leave gap; knowledge gap                                                                                                                                                                                                                                                                                                                  | IT       |
| utp                     | UTP                                  | Produced only | Mitochondria | NDPK2m                | gap eliminated; added UMPKm for modeling purpose: although no activity of such an enzyme has been shown for mitochondria up to date the UMP kinase function has to be present in order to "restaure" UTP from UMP for/ from mRNA synthesis/degradation. PMID: 11912132 showed that cytosolic CMP-UMP kinase has no mitochondrial activity | IT       |
| idp                     | IDP                                  | Consumed only | Mitochondria | NDPK9m                | leave gap; knowledge gap                                                                                                                                                                                                                                                                                                                  | IT       |
| itp                     | ITP                                  | Produced only | Mitochondria | NDPK9m                | leave gap; knowledge gap                                                                                                                                                                                                                                                                                                                  | IT       |
| nmn                     | NMN                                  | Consumed only | Mitochondria | NMNATm                | leave gap; i don't know how to connect rxn in mito with cytosol                                                                                                                                                                                                                                                                           | IT       |
| nicrnt                  | Nicotinate D-ribonucleotide          | Consumed only | Mitochondria | NNATm                 | leave gap; i don't know how to connect rxn in mito with cytosol                                                                                                                                                                                                                                                                           | IT       |
| dnad                    | Deamino-NAD+                         | Produced only | Mitochondria | NNATm                 | leave gap; i don't know how to connect rxn in mito with cytosol                                                                                                                                                                                                                                                                           | IT       |
| nrnccoa                 | nervonyl coenzyme A                  | Produced only | Mitochondria | NRVNCCT2              | was not removed - technically/physiologically the reaction CAN occur however long chain fatty acids (>C22) won't be oxidized in the mitochondria so it is unlikely to be used                                                                                                                                                             | NJ       |
| o2s                     | Superoxide anion                     | Consumed only | Cytosol      | O2Stm                 | gap removed; added rxn for diffusion of o2s                                                                                                                                                                                                                                                                                               | ND       |
| 4mptnl                  | 4-Methylpentanal                     | Produced only | Mitochondria | P45011A1m             | metabolized to isocaproic acid and isocapryl alcohol - see PMID: 8645003                                                                                                                                                                                                                                                                  | NJ       |
| 20ahcsterol             | 20alpha-hydroxy cholesterol          | Produced only | Mitochondria | P450SCC1m             | knowledge gap, model scope gap - hydroxylated cholesterol metabolism in the mitochondria - no significant literature found                                                                                                                                                                                                                | NJ       |
| pcrn                    | propionyl-carnitine                  | Produced only | Mitochondria | PCRNtm                | CSNAT3m removed and replaced with CSNAT2m, CSNAT3x made reversible                                                                                                                                                                                                                                                                        | NJ       |
| phe-L                   | L-Phenylalanine                      | Consumed only | Mitochondria | PHETA1m               | knowledge-base gap: leave in case transporters are found in the future                                                                                                                                                                                                                                                                    | SAB      |
| phpyr                   | Phenylpyruvate                       | Produced only | Mitochondria | PHETA1m               | knowledge-base gap: leave in case transporters are found in the future                                                                                                                                                                                                                                                                    | SAB      |
| pnto-R                  | (R)-Pantothenate                     | Consumed only | Mitochondria | PNTKm                 | leave gap for now: Hoertnagel et al, 2003, Human Mol. genetics, 12(3), 321-327: They also proposed that a complete intramitochondrial pathway for de novo synthesis of CoA exists, but could not find further evidence for this                                                                                                           | IT       |

| Metabolite Abbreviation | Metabolite Name                                            | Gap Type      | Compartment           | Reaction Abbreviation | Notes                                                                                                                                                                                                                                                                                                                                                                              | Reviewer |
|-------------------------|------------------------------------------------------------|---------------|-----------------------|-----------------------|------------------------------------------------------------------------------------------------------------------------------------------------------------------------------------------------------------------------------------------------------------------------------------------------------------------------------------------------------------------------------------|----------|
| 4ppan                   | D-4-Phosphopantothenate                                    | Produced only | Mitochondria          | PNTKm                 | leave gap for now: Hoernagel et al. 2003, Human Mol. genetics, 12(3), 321-327: They also proposed that a complete intramitochondrial pathway for de novo synthesis of CoA exists, but could not find further evidence for this                                                                                                                                                     | IT       |
| ppa                     | Propionate (n-C3:0)                                        | Consumed only | Cytosol               | PPAtm                 | gap removed; added rxn for extracellular -> cytosolic transport based on ref in thuy's mito model                                                                                                                                                                                                                                                                                  | ND       |
| 3hpcoa                  | 3-Hydroxypropionyl-CoA                                     | Produced only | Mitochondria          | PRFNCOAHYDm           | knowledge-base gap: good evidence for inclusion regardless of gap                                                                                                                                                                                                                                                                                                                  | SAB      |
| pyam5p                  | Pyridoxamine 5'-phosphate                                  | Produced only | Mitochondria          | PYAM5Ptm              | leave gap; exceeds model                                                                                                                                                                                                                                                                                                                                                           | IT       |
| pydx5p                  | Pyridoxal 5'-phosphate                                     | Produced only | Mitochondria          | PYDX5Ptm              | leave gap; exceeds model                                                                                                                                                                                                                                                                                                                                                           | IT       |
| pylald                  | Perillyl aldehyde                                          | Consumed only | Mitochondria          | PYLALDOXm             | knowledge-base gap: unknown where this metabolite goes in humans low priority subsystem also                                                                                                                                                                                                                                                                                       | SAB      |
| peracd                  | Perillic acid                                              | Produced only | Mitochondria          | PYLALDOXm             | knowledge-base gap: unknown where this metabolite goes in humans low priority subsystem also                                                                                                                                                                                                                                                                                       | SAB      |
| sl-L                    | L-sulfolactate                                             | Consumed only | Mitochondria          | SLDXm                 | knowledge-based gap                                                                                                                                                                                                                                                                                                                                                                | MM       |
| t2m26dcoa               | trans-2-Methyl-5-isopropylhexa-2,5-dienyl-CoA              | Consumed only | Mitochondria          | T2M26DCOAHm           | knowledge-base gap                                                                                                                                                                                                                                                                                                                                                                 | SAB      |
| tetpent3coa             | tetracosapentaenoyl coenzyme A, n-3                        | Produced only | Mitochondria          | TETPENT3CPT2          | was not removed - technically/physiologically the reaction CAN occur however long chain fatty acids (>C22) won't be oxidized in the mitochondria so it is unlikely to be used                                                                                                                                                                                                      | NJ       |
| tetpent6coa             | tetracosapentaenoyl coenzyme A, n-6                        | Produced only | Mitochondria          | TETPENT6CPT2          | was not removed - technically/physiologically the reaction CAN occur however long chain fatty acids (>C22) won't be oxidized in the mitochondria so it is unlikely to be used                                                                                                                                                                                                      | NJ       |
| tettet6coa              | tetracosatetraenoyl coenzyme A                             | Produced only | Mitochondria          | TETTET6CPT2           | was not removed - technically/physiologically the reaction CAN occur however long chain fatty acids (>C22) won't be oxidized in the mitochondria so it is unlikely to be used                                                                                                                                                                                                      | NJ       |
| thm                     | Thiamin                                                    | Produced only | Mitochondria          | THM2m                 | leave gap; knowledge based: It is thought that this SLC19A2 is also responsible for the mitochondrial transport since cells of TRMA patients (thiamine-responsive megaloblastic anemia) in this gene show no mitochondrial transport of thiamine. Role of thiamine in mitochondria is not clear (therefore will be a gap) since there is no mitochondrial thiamine diphosphokinase | IT       |
| trdox                   | Oxidized thioredoxin                                       | Consumed only | Mitochondria          | TRDRm                 | knowledge gap: thioredoxin is needed by ribonucleotide reductase, however, up to date only cytosolic version has been identified                                                                                                                                                                                                                                                   | IT       |
| trdrd                   | Reduced thioredoxin                                        | Produced only | Mitochondria          | TRDRm                 | knowledge gap: thioredoxin is needed by ribonucleotide reductase, however, up to date only cytosolic version has been identified                                                                                                                                                                                                                                                   | IT       |
| tdcoa                   | Tetradecenoyl-CoA (n-C14:0CoA)                             | Produced only | Mitochondria          | TTDCPT2               | FAOXC140 added                                                                                                                                                                                                                                                                                                                                                                     | NJ       |
| tyr-L                   | L-Tyrosine                                                 | Consumed only | Mitochondria          | TYRTAm                | knowledge-base gap: not clear how tyr-L enters mitochondria                                                                                                                                                                                                                                                                                                                        | SAB      |
| xoldiolone              | 7alpha,12alpha-Dihydroxycholest-4-en-3-one                 | Consumed only | Mitochondria          | XOLDIOLONEtm          | no xoldiolone reactions in mitochondria                                                                                                                                                                                                                                                                                                                                            | NJ       |
| co2                     | CO2                                                        | Consumed only | Nucleus               | CO2m                  | gap is due to transporter rxn in nucleus (not needed now, but ok to leave in)                                                                                                                                                                                                                                                                                                      | ND       |
| dna                     | DNA                                                        | Consumed only | Nucleus               | DNAMTSEn              | model-scope gap: DNA not represented in model so methylation will require sinks                                                                                                                                                                                                                                                                                                    | SAB      |
| dna5mtc                 | DNA 5-methylcytosine                                       | Produced only | Nucleus               | DNAMTSEn              | model-scope gap: DNA not represented in model so methylation will require sinks                                                                                                                                                                                                                                                                                                    | SAB      |
| dna                     | DNA                                                        | Consumed only | Nucleus               | DNAMTn                | model-scope gap: DNA not represented in model so methylation will require sinks                                                                                                                                                                                                                                                                                                    | SAB      |
| dna5mtc                 | DNA 5-methylcytosine                                       | Produced only | Nucleus               | DNAMTn                | model-scope gap: DNA not represented in model so methylation will require sinks                                                                                                                                                                                                                                                                                                    | SAB      |
| o2s                     | Superoxide anion                                           | Consumed only | Cytosol               | O2Stn                 | gap removed; added rxn for diffusion of o2s                                                                                                                                                                                                                                                                                                                                        | ND       |
| o2s                     | Superoxide anion                                           | Consumed only | Nucleus               | O2Stn                 | gap removed; added rxn for diffusion of o2s                                                                                                                                                                                                                                                                                                                                        | ND       |
| retn                    | Retinoate                                                  | Produced only | Nucleus               | RATm                  | leave gap; exceeds model                                                                                                                                                                                                                                                                                                                                                           | IT       |
| thbpt                   | Tetrahydrobiopterin                                        | Produced only | Nucleus               | SPRn                  | knowledge-base gap: unknown where selmeth comes from in humans modeling evidence only, need a source of selenomethionine                                                                                                                                                                                                                                                           | IT       |
| ahcys                   | S-Adenosyl-L-homocysteine                                  | Produced only | Endoplasmic Reticulum | AHCYStr               | gap filled, added AHCYStr                                                                                                                                                                                                                                                                                                                                                          | NJ       |
| dhcholoylcoa            | 3alpha,7alpha-Dihydroxy-5beta-cholest-24-enoyl-CoA         | Produced only | Endoplasmic Reticulum | AMACR2r               | leave gap for now, complete pathway in peroxisome                                                                                                                                                                                                                                                                                                                                  | NJ       |
| cholcoas                | 3alpha,7alpha,12alpha-Trihydroxy-5beta-cholestanoyl-CoA(S) | Produced only | Endoplasmic Reticulum | AMACRr                | leave gap for now, complete pathway in peroxisome                                                                                                                                                                                                                                                                                                                                  | NJ       |
| amet                    | S-Adenosyl-L-methionine                                    | Consumed only | Endoplasmic Reticulum | AMETr                 | gap filled, added AMETr                                                                                                                                                                                                                                                                                                                                                            | NJ       |
| bz                      | Benzoate                                                   | Consumed only | Cytosol               | BZr                   | gap filled, added BZr                                                                                                                                                                                                                                                                                                                                                              | NJ       |
| nh4                     | Ammonium                                                   | Produced only | Endoplasmic Reticulum | CBPPer                | knowledge-base gap; we don't have any rxns which consume nh4 in the ER. If need be one could potentially resolve this gap by adding ER-cytosol transport (but have not come across any evidence for that yet preliminary search)                                                                                                                                                   | ND       |
| coke                    | cocaine                                                    | Consumed only | Endoplasmic Reticulum | COKECESr              | 11DOCRTSLr, 11DOCRTSLm                                                                                                                                                                                                                                                                                                                                                             | NJ       |

| Metabolite Abbreviation | Metabolite Name                                                                                                                               | Gap Type      | Compartment           | Reaction Abbreviation | Notes                                                                                                                                                                                                  | Reviewer |
|-------------------------|-----------------------------------------------------------------------------------------------------------------------------------------------|---------------|-----------------------|-----------------------|--------------------------------------------------------------------------------------------------------------------------------------------------------------------------------------------------------|----------|
| ertstrn                 | Corticosterone                                                                                                                                | Produced only | Endoplasmic Reticulum | CRTSTRNtr             | CRTSTRNtr, CRTSTRNtm                                                                                                                                                                                   | NJ       |
| crn                     | L-Carnitine                                                                                                                                   | Consumed only | Endoplasmic Reticulum | CSNATer               | Not currently used reactions, see PMID: 11257506                                                                                                                                                       | NJ       |
| acrn                    | O-Acetylcarnitine                                                                                                                             | Produced only | Endoplasmic Reticulum | CSNATer               | Not currently used reactions, see PMID: 11257506                                                                                                                                                       | NJ       |
| Asn-X-Ser/Thr           | protein-linked asparagine residue (N-glycosylation site)                                                                                      | Consumed only | Endoplasmic Reticulum | DOLASNT_Ler           | gap OK; represents polypeptide which would be broken down in lysosome                                                                                                                                  | ND       |
| Asn-X-Ser/Thr           | protein-linked asparagine residue (N-glycosylation site)                                                                                      | Consumed only | Endoplasmic Reticulum | DOLASNT_Uer           | gap OK; represents polypeptide which would be broken down in lysosome                                                                                                                                  | ND       |
| estriol                 | estriol                                                                                                                                       | Produced only | Cytosol               | ESTRIOLtr             | no cytosolic estriol reactions                                                                                                                                                                         | NJ       |
| ru5p-D                  | D-Ribulose 5-phosphate                                                                                                                        | Produced only | Endoplasmic Reticulum | GNDer                 | there has been speculation that the entire PPP occurs in the ER, but there is no direct evidence for any enzymes past this step.... Rather than inferring rest of pathway have left as a knowledge gap | ND       |
| dem2emgacpail_prot_hs   | deacylated-(phosphoethanolaminyldimannosyl),(phosphoethanolaminyl)-mannosyl-glucosaminylacylphosphatidylinositol                              | Produced only | Endoplasmic Reticulum | GPIDA2er              | gap ok, represents additional processing of GPI anchor; this is a modeling dead-end (transport of this metabolite to plasma membrane is beyond the scope of our network)                               | ND       |
| dgpi_prot_hs            | deacylated-glycophosphatidylinositol (GPI)-anchored protein                                                                                   | Produced only | Endoplasmic Reticulum | GPIDAer               | gap ok, represents additional processing of GPI anchor; this is a modeling dead-end (transport of this metabolite to plasma membrane is beyond the scope of our network)                               | ND       |
| pre_prot                | glycophosphatidylinositol (GPI)-anchored protein precursor                                                                                    | Consumed only | Endoplasmic Reticulum | H7TAer                | gap OK; peptide binding site for GPI anchor, its biosynthesis is outside the scope of model                                                                                                            | ND       |
| pre_prot                | glycophosphatidylinositol (GPI)-anchored protein precursor                                                                                    | Consumed only | Endoplasmic Reticulum | H8TAer                | gap OK; peptide binding site for GPI anchor, its biosynthesis is outside the scope of model                                                                                                            | ND       |
| hmgcoa                  | Hydroxymethylglutaryl-CoA                                                                                                                     | Consumed only | Endoplasmic Reticulum | HMGCOAr               | complete reaction in peroxisomal version                                                                                                                                                               | NJ       |
| mev-R                   | (R)-Mevalonate                                                                                                                                | Produced only | Endoplasmic Reticulum | HMGCOAr               | complete reaction in peroxisomal version                                                                                                                                                               | NJ       |
| pre_prot                | glycophosphatidylinositol (GPI)-anchored protein precursor                                                                                    | Consumed only | Endoplasmic Reticulum | M4ATAer               | gap OK; peptide binding site for GPI anchor, its biosynthesis is outside the scope of model                                                                                                            | ND       |
| m(em)3gacpail_prot_hs   | mannosyl-3-(phosphoethanolaminyldimannosyl)-glucosaminylacylphosphatidylinositol-Protein (M4A)                                                | Produced only | Endoplasmic Reticulum | M4ATAer               | gap OK; this is an alternative GPI structure which has recently been suggested as a substrate of human GPI transamidase                                                                                | ND       |
| pre_prot                | glycophosphatidylinositol (GPI)-anchored protein precursor                                                                                    | Consumed only | Endoplasmic Reticulum | M4BTAer               | gap OK; peptide binding site for GPI anchor, its biosynthesis is outside the scope of model                                                                                                            | ND       |
| mem2emgacpail_prot_hs   | (((((mannosyl),(phosphoethanolaminyldimannosyl),(phosphoethanolaminyldimannosyl))-mannosyl-glucosaminylacylphosphatidylinositol-Protein (M4B) | Produced only | Endoplasmic Reticulum | M4BTAer               | gap OK; this is an alternative GPI structure which has recently been suggested as a substrate of human GPI transamidase                                                                                | ND       |
| acald                   | Acetaldehyde                                                                                                                                  | Produced only | Endoplasmic Reticulum | P45017A2r             | ACALDr - knowledge gap, unknown mechanism                                                                                                                                                              | NJ       |
| acald                   | Acetaldehyde                                                                                                                                  | Produced only | Endoplasmic Reticulum | P45017A4r             | ACALDr - knowledge gap, unknown mechanism                                                                                                                                                              | NJ       |
| whtststerone            | w hydroxy testosterone                                                                                                                        | Produced only | Endoplasmic Reticulum | P4503A43r             | WHTSTSTERONEte - unkown transporter and metabolism                                                                                                                                                     | NJ       |
| 12harachd               | 12 hydroxy arachidonic acid                                                                                                                   | Produced only | Endoplasmic Reticulum | P4504B1r              | knowledge gap > model scope limitation, final location of many of the hydroxylated arachidonic acid products not well defined - many of these have short half-lives and are quickly metabolized        | NJ       |
| wharachd                | w-hydroxyl arachidonic acid                                                                                                                   | Produced only | Endoplasmic Reticulum | P4504F121r            | knowledge gap > model scope limitation, final location of many of the hydroxylated arachidonic acid products not well defined - many of these have short half-lives and are quickly metabolized        | NJ       |
| 18harachd               | 18 hydroxy arachidonic acid                                                                                                                   | Produced only | Endoplasmic Reticulum | P4504F81r             | knowledge gap > model scope limitation, final location of many of the hydroxylated arachidonic acid products not well defined - many of these have short half-lives and are quickly metabolized        | NJ       |
| leuktrB4wcooh           | w-carboxy leukotriene B4                                                                                                                      | Produced only | Endoplasmic Reticulum | P450LTB4r             | principally knowledge gap, partial scope limitations                                                                                                                                                   | NJ       |
| pecgoncoa               | Pseudoecgonyl-CoA                                                                                                                             | Produced only | Endoplasmic Reticulum | PECGONCOATr           | modeling-gap: this is the end of the line in KEGG for cocaine degradation                                                                                                                              | SAB      |
| prostgd2                | Prostaglandin D2                                                                                                                              | Produced only | Endoplasmic Reticulum | PGDIr                 | principally a knowledge gap problem - further metabolism, etc unknown, since at the 'fringes' partial model scope gap also - see Goodman and Gilman, Murray Biochem for overall pathway                | NJ       |

| Metabolite Abbreviation | Metabolite Name                                           | Gap Type      | Compartment           | Reaction Abbreviation | Notes                                                                                                                                                                                   | Reviewer |
|-------------------------|-----------------------------------------------------------|---------------|-----------------------|-----------------------|-----------------------------------------------------------------------------------------------------------------------------------------------------------------------------------------|----------|
| prostge2                | Prostaglandin E2                                          | Produced only | Endoplasmic Reticulum | PGESr                 | principally a knowledge gap problem - further metabolism, etc unknown, since at the 'fringes' partial model scope gap also - see Goodman and Gilman, Murray Biochem for overall pathway | NJ       |
| prostgi2                | Prostaglandin I2                                          | Produced only | Endoplasmic Reticulum | PGISr                 | principally a knowledge gap problem - further metabolism, etc unknown, since at the 'fringes' partial model scope gap also - see Goodman and Gilman, Murray Biochem for overall pathway | NJ       |
| pail4p_hs               | 1-Phosphatidyl-1D-myo-inositol 4-phosphate (Homo sapiens) | Consumed only | Endoplasmic Reticulum | PI4P3Ker              | leave gap; this is just an alternative localization for enzyme in complete (functional) cytosolic pathway                                                                               | ND       |
| pail34p_hs              | phosphatidylinositol-3,4-bisphosphate (Homo sapiens)      | Produced only | Endoplasmic Reticulum | PI4P3Ker              | leave gap; this is just an alternative localization for enzyme in complete (functional) cytosolic pathway                                                                               | ND       |
| pail5p_hs               | 1-Phosphatidyl-1D-myo-inositol 5-phosphate (Homo sapiens) | Consumed only | Endoplasmic Reticulum | PI5P3Ker              | leave gap; this is just an alternative localization for enzyme in complete (functional) cytosolic pathway                                                                               | ND       |
| pail35p_hs              | phosphatidylinositol-3,5-bisphosphate (Homo sapiens)      | Produced only | Endoplasmic Reticulum | PI5P3Ker              | leave gap; this is just an alternative localization for enzyme in complete (functional) cytosolic pathway                                                                               | ND       |
| pail_hs                 | phosphatidylinositol (homo sapiens)                       | Consumed only | Endoplasmic Reticulum | PIK3er                | leave gap; this is just an alternative localization for enzyme in complete (functional) cytosolic pathway                                                                               | ND       |
| pail3p_hs               | 1-Phosphatidyl-1D-myo-inositol 3-phosphate (Homo sapiens) | Produced only | Endoplasmic Reticulum | PIK3er                | leave gap; this is just an alternative localization for enzyme in complete (functional) cytosolic pathway                                                                               | ND       |
| pepslys                 | peptide sans lysine                                       | Produced only | Endoplasmic Reticulum | PLYSPSer              | model-scope gap; this is just a generic peptide                                                                                                                                         | MM       |
| akg                     | 2-Oxoglutarate                                            | Consumed only | Endoplasmic Reticulum | PROAKGOX1r            | modeling gap: hydroxproline isn't currently used in the model so this reaction isn't (yet) important                                                                                    | SAB      |
| pro-L                   | L-Proline                                                 | Consumed only | Endoplasmic Reticulum | PROAKGOX1r            | modeling gap: hydroxproline isn't currently used in the model so this reaction isn't (yet) important                                                                                    | SAB      |
| 4hpro-LT                | trans-4-Hydroxy-L-proline                                 | Produced only | Endoplasmic Reticulum | PROAKGOX1r            | modeling gap: hydroxproline isn't currently used in the model so this reaction isn't (yet) important                                                                                    | SAB      |
| succ                    | Succinate                                                 | Produced only | Endoplasmic Reticulum | PROAKGOX1r            | modeling gap: hydroxproline isn't currently used in the model so this reaction isn't (yet) important                                                                                    | SAB      |
| ps_hs                   | phosphatidylserine (homo sapiens)                         | Produced only | Endoplasmic Reticulum | PS_HSter              | ps_hs not used in any ER reactions currently                                                                                                                                            | NJ       |
| hxdcal                  | Hexadecanal                                               | Produced only | Endoplasmic Reticulum | SGPL11r               | removed due to SGPL12r                                                                                                                                                                  | NJ       |
| R1coa_hs                | R group 1 Coenzyme A homo sapiens                         | Consumed only | Endoplasmic Reticulum | SOAT11r               | complete reaction in cytosolic version                                                                                                                                                  | NJ       |
| xolest_hs               | cholesterol ester                                         | Produced only | Endoplasmic Reticulum | SOAT11r               | complete reaction in cytosolic version                                                                                                                                                  | NJ       |
| R2coa_hs                | R group 2 Coenzyme A homo sapiens                         | Consumed only | Endoplasmic Reticulum | SOAT12r               | complete reaction in cytosolic version                                                                                                                                                  | NJ       |
| xolest_hs               | cholesterol ester                                         | Produced only | Endoplasmic Reticulum | SOAT12r               | complete reaction in cytosolic version                                                                                                                                                  | NJ       |
| so4                     | Sulfate                                                   | Produced only | Endoplasmic Reticulum | STS1r                 | - knowledge gap, unknown mechanism                                                                                                                                                      | NJ       |
| estrones                | Estrone 3-sulfate                                         | Consumed only | Endoplasmic Reticulum | STS2r                 | STS2 is completed, intracellular transport of estrones not known - knowledge gap                                                                                                        | NJ       |
| so4                     | Sulfate                                                   | Produced only | Endoplasmic Reticulum | STS2r                 | - knowledge gap, unknown mechanism                                                                                                                                                      | NJ       |
| chsterols               | cholesterol sulfate                                       | Consumed only | Endoplasmic Reticulum | STS3r                 | STS3 is completed, intracellular transport of chsterols not known - knowledge gap                                                                                                       | NJ       |
| so4                     | Sulfate                                                   | Produced only | Endoplasmic Reticulum | STS3r                 | - knowledge gap, unknown mechanism                                                                                                                                                      | NJ       |
| prgnlones               | pregnenolone sulfate                                      | Consumed only | Endoplasmic Reticulum | STS4r                 | STS4 is completed, intracellular transport of prgnlones not known - knowledge gap                                                                                                       | NJ       |
| so4                     | Sulfate                                                   | Produced only | Endoplasmic Reticulum | STS4r                 | - knowledge gap, unknown mechanism                                                                                                                                                      | NJ       |
| txa2                    | Thromboxane A2                                            | Consumed only | Cytosol               | TXA2r                 | removed gap, replaced TXA2e                                                                                                                                                             | NJ       |
| udpagal                 | UDP-N-acetyl-D-galactosamine                              | Produced only | Endoplasmic Reticulum | UGALNACter            | udpagal is not used in any ER reactions currently                                                                                                                                       | NJ       |
| andrstrnglc             | androsterone glucuronide                                  | Produced only | Endoplasmic Reticulum | UGT1A3r               | ANDRSTRNGLCtr, ANDRSTRNGLCte                                                                                                                                                            | NJ       |
| ahandrostan             | 3alpha-Hydroxy-5beta-androstan-17-one                     | Consumed only | Endoplasmic Reticulum | UGT1A7r               | model scope and knowledge limitations                                                                                                                                                   | NJ       |
| dhcholestanate          | 3alpha,7alpha-Dihydroxy-5beta-cholestanate                | Consumed only | Endoplasmic Reticulum | VLCS2r                | leave - gap in ER, complete in mit-> peroxisome                                                                                                                                         | NJ       |
| thcholstoic             | 3alpha,7alpha,12alpha-Trihydroxy-5beta-cholestanate       | Consumed only | Endoplasmic Reticulum | VLCSr                 | leave - gap in ER, complete in mit-> peroxisome                                                                                                                                         | NJ       |
| xol7ah2                 | 3alpha,7alpha-Dihydroxy-5beta-cholestane                  | Produced only | Endoplasmic Reticulum | XOL7AH2r              | no xol7ah2 reactions in ER right now                                                                                                                                                    | NJ       |
| xoldiolone              | 7alpha,12alpha-Dihydroxycholest-4-en-3-one                | Consumed only | Mitochondria          | XOLDIOLONEtm          | no xoldiolone reactions in mitochondria                                                                                                                                                 | NJ       |
| xoltriol                | 3alpha,7alpha,12alpha-Trihydroxy-5beta-cholestane         | Produced only | Endoplasmic Reticulum | XOLTRIOLr             | no xoltriol reactions in ER right now                                                                                                                                                   | NJ       |

| Metabolite Abbreviation | Metabolite Name                                                   | Gap Type      | Compartment           | Reaction Abbreviation | Notes                                                                                                                                                                                                                                                         | Reviewer |
|-------------------------|-------------------------------------------------------------------|---------------|-----------------------|-----------------------|---------------------------------------------------------------------------------------------------------------------------------------------------------------------------------------------------------------------------------------------------------------|----------|
| Ser-Gly/Ala-X-Gly       | protein-linked serine residue (glycosaminoglycan attachment site) | Consumed only | Endoplasmic Reticulum | XYLTer                | gap ok; represents peptide binding site for GAG chains                                                                                                                                                                                                        | ND       |
| 3odcoa                  | 3-Oxodecanoyl-CoA                                                 | Consumed only | Peroxisome            | ACACT4p               | knowledge-based gap                                                                                                                                                                                                                                           | NJ       |
| 3oddcoa                 | 3-Oxododecanoyl-CoA                                               | Consumed only | Peroxisome            | ACACT5p               | model-scope gap: presumably will be a cellular demand                                                                                                                                                                                                         | NJ       |
| dcacoa                  | Decanoyl-CoA (n-C10:0CoA)                                         | Produced only | Peroxisome            | ACACT5p               | peroxisomal thioesterases are known to exist, they hydrolyze acyl-CoA to their respective free FA and coa, it is believed that they may regulate FA content of perox membranes and perox prolifer, at this point no info to add transporters or new reactions | NJ       |
| 3otdcoa                 | 3-Oxotetradecanoyl-CoA                                            | Consumed only | Peroxisome            | ACACT6p               | knowledge-base gap                                                                                                                                                                                                                                            | NJ       |
| ddcacoa                 | Dodecanoyl-CoA (n-C12:0CoA)                                       | Produced only | Peroxisome            | ACACT6p               | peroxisomal thioesterases are known to exist, they hydrolyze acyl-CoA to their respective free FA and coa, it is believed that they may regulate FA content of perox membranes and perox prolifer, at this point no info to add transporters or new reactions | NJ       |
| 3ohdcoa                 | 3-Oxohexadecanoyl-CoA                                             | Consumed only | Peroxisome            | ACACT7p               | model-scope gap                                                                                                                                                                                                                                               | NJ       |
| tdcoa                   | Tetradecanoyl-CoA (n-C14:0CoA)                                    | Produced only | Peroxisome            | ACACT7p               | peroxisomal thioesterases are known to exist, they hydrolyze acyl-CoA to their respective free FA and coa, it is believed that they may regulate FA content of perox membranes and perox prolifer, at this point no info to add transporters or new reactions | NJ       |
| 3ohodcoa                | 3-Oxo-octadecanoyl-CoA                                            | Consumed only | Peroxisome            | ACACT8p               | knowledge-base gap: KEGG is the only evidence for this reaction                                                                                                                                                                                               | NJ       |
| 3ohxcoa                 | 3-Oxohexacosyl-CoA                                                | Consumed only | Peroxisome            | ACACT9p               | knowledge-base gap                                                                                                                                                                                                                                            | NJ       |
| ttcoa                   | tetracosanoyl-CoA (n-C24:0CoA)                                    | Produced only | Peroxisome            | ACACT9p               | peroxisomal thioesterases are known to exist, they hydrolyze acyl-CoA to their respective free FA and coa, it is believed that they may regulate FA content of perox membranes and perox prolifer, at this point no info to add transporters or new reactions | NJ       |
| alkylR1oh               | hydroxy alkyl chain                                               | Consumed only | Peroxisome            | AGPSx                 | knowledge gap and model scope limitation - when tissue specific models are developed and specific FA of interest are identified, specific pathways (rather than general FA) can be picked and described                                                       | NJ       |
| c2m26dcoa               | cis-2-Methyl-5-isopropylhexa-2,5-dienoyl-CoA                      | Consumed only | Peroxisome            | C2M26DCOAHlx          | model-scope gap: unimportant                                                                                                                                                                                                                                  | SAB      |
| arg-D                   | D-Arginine                                                        | Consumed only | Peroxisome            | DARGOp                | model-scope gap: relatively unimportant at this stage                                                                                                                                                                                                         | SAB      |
| 5g2oxpt                 | 5-Guanidino-2-oxopentanoate                                       | Produced only | Peroxisome            | DARGOp                | model-scope gap: relatively unimportant at this stage                                                                                                                                                                                                         | SAB      |
| oaa                     | Oxaloacetate                                                      | Produced only | Peroxisome            | DASPO1p               | knowledge-based gap                                                                                                                                                                                                                                           | MM       |
| Rtotalcoa               | R total Coenzyme A                                                | Consumed only | Peroxisome            | DHAPAx                | model-scope gap                                                                                                                                                                                                                                               | NJ       |
| dhap                    | Dihydroxyacetone phosphate                                        | Consumed only | Peroxisome            | DHAPAx                | DHAPA in cytosol should be complete w/ ADHAPtx                                                                                                                                                                                                                | NJ       |
| orn-D                   | D-Ornithine                                                       | Consumed only | Peroxisome            | DORNOp                | model-scope gap: relatively unimportant at this stage                                                                                                                                                                                                         | SAB      |
| 5a2opntn                | 5-Amino-2-oxopentanoate                                           | Produced only | Peroxisome            | DORNOp                | knowledge-based gap                                                                                                                                                                                                                                           | SAB      |
| pro-D                   | D-Proline                                                         | Consumed only | Peroxisome            | DPROOp                | model-scope gap: relatively unimportant at this stage                                                                                                                                                                                                         | SAB      |
| 1p2cbxl                 | 1-Pyrroline-2-carboxylate                                         | Produced only | Peroxisome            | DPROOp                | model-scope gap: relatively unimportant at this stage                                                                                                                                                                                                         | SAB      |
| b2coa                   | trans-But-2-enoyl-CoA                                             | Produced only | Peroxisome            | ECOAH1x               | knowledge-base gap: localization is by enzyme similarity                                                                                                                                                                                                      | SAB      |
| icit                    | Isocitrate                                                        | Consumed only | Peroxisome            | ICDHyp                | known gap; the source of intraperoxisomal isocitrate has not been determined [Geisbrecht 1999]                                                                                                                                                                | ND       |
| malcoa                  | Malonyl-CoA                                                       | Consumed only | Peroxisome            | MCDp                  | peroxisomal thioesterases are known to exist, they hydrolyze acyl-CoA to their respective free FA and coa, it is believed that they may regulate FA content of perox membranes and perox prolifer, at this point no info to add transporters or new reactions | NJ       |
| mmcoa-S                 | (S)-Methylmalonyl-CoA                                             | Consumed only | Peroxisome            | MMCDp                 | knowledge-based gap                                                                                                                                                                                                                                           | MM       |
| o2s                     | Superoxide anion                                                  | Consumed only | Cytosol               | O2Stx                 | gap removed; added rxn for diffusion of o2s                                                                                                                                                                                                                   | ND       |
| o2s                     | Superoxide anion                                                  | Consumed only | Peroxisome            | O2Stx                 | gap removed; added rxn for diffusion of o2s                                                                                                                                                                                                                   | ND       |
| prpcoa                  | Propenoyl-CoA                                                     | Consumed only | Peroxisome            | PRPNCOAHYDx           | knowledge-base gap                                                                                                                                                                                                                                            | SAB      |
| 3hpcoa                  | 3-Hydroxypropionyl-CoA                                            | Produced only | Peroxisome            | PRPNCOAHYDx           | knowledge-base gap                                                                                                                                                                                                                                            | SAB      |
| hdca                    | Hexadecanoate (n-C16:0)                                           | Produced only | Peroxisome            | PTE2x                 | peroxisomal thioesterases are known to exist, they hydrolyze acyl-CoA to their respective free FA and coa, it is believed that they may regulate FA content of perox membranes and perox prolifer, at this point no info to add transporters or new reactions | NJ       |
| phyt                    | phytic acid                                                       | Produced only | Peroxisome            | PTE4x                 | PHYT                                                                                                                                                                                                                                                          | NJ       |
| adrn                    | adrenic acid                                                      | Produced only | Peroxisome            | PTE5x                 | peroxisomal thioesterases are known to exist, they hydrolyze acyl-CoA to their respective free FA and coa, it is believed that they may regulate FA content of perox membranes and perox prolifer, at this point no info to add transporters or new reactions | NJ       |
| fald                    | Formaldehyde                                                      | Produced only | Peroxisome            | SARCOXp               | knowledge-based gap                                                                                                                                                                                                                                           | MM       |

| Metabolite Abbreviation | Metabolite Name                                | Gap Type      | Compartment | Reaction Abbreviation | Notes                                                                                                                                                                                                       | Reviewer |
|-------------------------|------------------------------------------------|---------------|-------------|-----------------------|-------------------------------------------------------------------------------------------------------------------------------------------------------------------------------------------------------------|----------|
| dmnoncoa                | 4,8 dimethylnonanoyl-CoA                       | Consumed only | Cytosol     | SCP22x                | Will leave gap at present time, sterol carrier protein can move fatty acid derivatives (usually steroid precursors) into different compartments, details about specific substrates and mechanisms not known | NJ       |
| t2m26coa                | trans-2-Methyl-5-isopropylhexa-2,5-dienoyl-CoA | Consumed only | Peroxisome  | T2M26DCOHLx           | knowledge-base gap                                                                                                                                                                                          | SAB      |
