# Supplementary material
Source: PubMed Central journal article supplement (PMC1794290)
Supplement: pnas_0610772104_16.pdf [file pnas_0610772104_16.pdf]

**Table 11: Expression changes in glycolysis/gluconeogenesis for the gastric bypass study.**

Alphabetized list of reactions in glycolysis/gluconeogenesis (as defined by Recon 1). Ratio is the average log<sub>10</sub> expression ratio ( $n=3$ ) of post-/pregene expression measurements (see text for details). Negative ratios (green) indicate a decrease in expression postsurgery whereas positive ratios indicate an increase (red). Values denoted with “n/a” indicate that gene expression values were unavailable, or that expression ratios conflicted at the probe or patient levels.

| Reaction | Putative function                                            | Locus    | Ratio  |
|----------|--------------------------------------------------------------|----------|--------|
| ACS      | acetyl-CoA synthetase                                        | 65985.1  | n/a    |
| ACS      | acetyl-CoA synthetase                                        | 55902.1  | n/a    |
| ACS      | acetyl-CoA synthetase                                        | 55902.2  | n/a    |
| ACSm     | acetyl-CoA synthetase                                        | 84532.1  | n/a    |
| ACYP     | acylphosphatase                                              | 98.1     | -0.16  |
| ACYP     | acylphosphatase                                              | 97.2     | n/a    |
| ACYP     | acylphosphatase                                              | 112611.1 | n/a    |
| ACYP     | acylphosphatase                                              | 97.1     | n/a    |
| ALCD2if  | alcohol dehydrogenase, forward rxn (ethanol -> acetaldehyde) | 125.1    | 0.233  |
| ALCD2if  | alcohol dehydrogenase, forward rxn (ethanol -> acetaldehyde) | 124.1    | 0.233  |
| ALCD2if  | alcohol dehydrogenase, forward rxn (ethanol -> acetaldehyde) | 126.1    | 0.233  |
| ALCD2if  | alcohol dehydrogenase, forward rxn (ethanol -> acetaldehyde) | 130.1    | 0.32   |
| ALCD2if  | alcohol dehydrogenase, forward rxn (ethanol -> acetaldehyde) | 131.1    | n/a    |
| ALCD2if  | alcohol dehydrogenase, forward rxn (ethanol -> acetaldehyde) | 137872.1 | n/a    |
| ALCD2if  | alcohol dehydrogenase, forward rxn (ethanol -> acetaldehyde) | 127.1    | n/a    |
| ALCD2if  | alcohol dehydrogenase, forward rxn (ethanol -> acetaldehyde) | 284273.2 | n/a    |
| ALCD2if  | alcohol dehydrogenase, forward rxn (ethanol -> acetaldehyde) | 284273.1 | n/a    |
| ALCD2if  | alcohol dehydrogenase, forward rxn (ethanol -> acetaldehyde) | 128.1    | n/a    |
| ALCD2yf  | alcohol dehydrogenase (ethanol, NADP), forward reaction      | 10327.1  | 0.066  |
| ALCD2yf  | alcohol dehydrogenase (ethanol, NADP), forward reaction      | 10327.2  | n/a    |
| ALDD2x   | aldehyde dehydrogenase (acetaldehyde, NAD)                   | 218.1    | -0.247 |
| ALDD2x   | aldehyde dehydrogenase (acetaldehyde, NAD)                   | 8854.1   | 0.273  |
| ALDD2x   | aldehyde dehydrogenase (acetaldehyde, NAD)                   | 222.1    | 0.284  |
| ALDD2x   | aldehyde dehydrogenase (acetaldehyde, NAD)                   | 501.1    | n/a    |
| ALDD2x   | aldehyde dehydrogenase (acetaldehyde, NAD)                   | 216.1    | n/a    |
| ALDD2x   | aldehyde dehydrogenase (acetaldehyde, NAD)                   | 8854.3   | n/a    |
| ALDD2x   | aldehyde dehydrogenase (acetaldehyde, NAD)                   | 8854.2   | n/a    |

| Reaction | Putative function                                                | Locus   | Ratio  |
|----------|------------------------------------------------------------------|---------|--------|
| ALDD2x   | aldehyde dehydrogenase (acetaldehyde, NAD)                       | 224.1   | n/a    |
| ALDD2x   | aldehyde dehydrogenase (acetaldehyde, NAD)                       | 223.1   | n/a    |
| ALDD2x   | aldehyde dehydrogenase (acetaldehyde, NAD)                       | 220.1   | n/a    |
| ALDD2x   | aldehyde dehydrogenase (acetaldehyde, NAD)                       | 221.1   | n/a    |
| ALDD2xm  | aldehyde dehydrogenase (acetaldehyde, NAD),<br>mitochondrial     | 219.1   | -0.469 |
| ALDD2xm  | aldehyde dehydrogenase (acetaldehyde, NAD),<br>mitochondrial     | 217.1   | -0.039 |
| ALDD2y   | aldehyde dehydrogenase (acetaldehyde, NADP)                      | 218.1   | -0.247 |
| ALDD2y   | aldehyde dehydrogenase (acetaldehyde, NADP)                      | 8854.1  | 0.273  |
| ALDD2y   | aldehyde dehydrogenase (acetaldehyde, NADP)                      | 222.1   | 0.284  |
| ALDD2y   | aldehyde dehydrogenase (acetaldehyde, NADP)                      | 8854.3  | n/a    |
| ALDD2y   | aldehyde dehydrogenase (acetaldehyde, NADP)                      | 8854.2  | n/a    |
| ALDD2y   | aldehyde dehydrogenase (acetaldehyde, NADP)                      | 224.1   | n/a    |
| ALDD2y   | aldehyde dehydrogenase (acetaldehyde, NADP)                      | 223.1   | n/a    |
| ALDD2y   | aldehyde dehydrogenase (acetaldehyde, NADP)                      | 221.1   | n/a    |
| CAT2p    | catalase A, peroxisomal (ethanol)                                | 847.1   | n/a    |
| CBPPer   | Carbamoyl phosphate phosphotransferase,<br>endoplasmic reticulum | 92579.1 | -0.133 |
| CBPPer   | Carbamoyl phosphate phosphotransferase,<br>endoplasmic reticulum | 57818.1 | n/a    |
| CBPPer   | Carbamoyl phosphate phosphotransferase,<br>endoplasmic reticulum | 2538.1  | n/a    |
| DPGase   | Diphosphoglycerate phosphatase                                   | 5223.1  | 0.125  |
| DPGase   | Diphosphoglycerate phosphatase                                   | 5224.1  | n/a    |
| DPGase   | Diphosphoglycerate phosphatase                                   | 669.2   | n/a    |
| DPGase   | Diphosphoglycerate phosphatase                                   | 5224.2  | n/a    |
| DPGase   | Diphosphoglycerate phosphatase                                   | 669.1   | n/a    |
| DPGM     | Diphosphoglyceromutase                                           | 5223.1  | 0.125  |
| DPGM     | Diphosphoglyceromutase                                           | 5224.1  | n/a    |
| DPGM     | Diphosphoglyceromutase                                           | 669.2   | n/a    |
| DPGM     | Diphosphoglyceromutase                                           | 5224.2  | n/a    |
| DPGM     | Diphosphoglyceromutase                                           | 669.1   | n/a    |
| ENO      | enolase                                                          | 2023.1  | 0.075  |
| ENO      | enolase                                                          | 26237.1 | 0.186  |

| Reaction | Putative function                                          | Locus    | Ratio  |
|----------|------------------------------------------------------------|----------|--------|
| ENO      | enolase                                                    | 2027.1   | n/a    |
| ENO      | enolase                                                    | 2027.2   | n/a    |
| ENO      | enolase                                                    | 2026.1   | n/a    |
| ETOHMO   | ethanol monooxygenase                                      | 1571.1   | -0.258 |
| FBA      | fructose-bisphosphate aldolase                             | 229.1    | 0.188  |
| FBA      | fructose-bisphosphate aldolase                             | 226.1    | n/a    |
| FBA      | fructose-bisphosphate aldolase                             | 230.1    | n/a    |
| FBA      | fructose-bisphosphate aldolase                             | 226.2    | n/a    |
| FBA      | fructose-bisphosphate aldolase                             | 226.3    | n/a    |
| FBP      | fructose-bisphosphatase                                    | 2203.1   | n/a    |
| FBP      | fructose-bisphosphatase                                    | 8789.1   | n/a    |
| G3PD2m   | glycerol-3-phosphate dehydrogenase (FAD),<br>mitochondrial | 2820.1   | n/a    |
| G6PPer   | glucose-6-phosphate phosphatase, edoplasmic<br>reticular   | 92579.1  | -0.133 |
| G6PPer   | glucose-6-phosphate phosphatase, edoplasmic<br>reticular   | 57818.1  | n/a    |
| G6PPer   | glucose-6-phosphate phosphatase, edoplasmic<br>reticular   | 2538.1   | n/a    |
| GAPD     | glyceraldehyde-3-phosphate dehydrogenase                   | 26330.1  | n/a    |
| GAPD     | glyceraldehyde-3-phosphate dehydrogenase                   | 2597.1   | n/a    |
| HEX1     | hexokinase (D-glucose:ATP)                                 | 3098.4   | n/a    |
| HEX1     | hexokinase (D-glucose:ATP)                                 | 2645.3   | n/a    |
| HEX1     | hexokinase (D-glucose:ATP)                                 | 3098.1   | n/a    |
| HEX1     | hexokinase (D-glucose:ATP)                                 | 3098.2   | n/a    |
| HEX1     | hexokinase (D-glucose:ATP)                                 | 3099.1   | n/a    |
| HEX1     | hexokinase (D-glucose:ATP)                                 | 2645.2   | n/a    |
| HEX1     | hexokinase (D-glucose:ATP)                                 | 80201.1  | n/a    |
| HEX1     | hexokinase (D-glucose:ATP)                                 | 3098.5   | n/a    |
| HEX1     | hexokinase (D-glucose:ATP)                                 | 3098.3   | n/a    |
| HEX1     | hexokinase (D-glucose:ATP)                                 | 2645.1   | n/a    |
| HEX1     | hexokinase (D-glucose:ATP)                                 | 3101.1   | n/a    |
| LDH_L    | L-lactate dehydrogenase                                    | 92483.1  | -0.437 |
| LDH_L    | L-lactate dehydrogenase                                    | 3948.2   | n/a    |
| LDH_L    | L-lactate dehydrogenase                                    | 160287.1 | n/a    |
| LDH_L    | L-lactate dehydrogenase                                    | 3945.1   | n/a    |
| LDH_L    | L-lactate dehydrogenase                                    | 3948.1   | n/a    |
| LDH_L    | L-lactate dehydrogenase                                    | 3939.1   | n/a    |
| LDH_L    | L-lactate dehydrogenase                                    | 55293.1  | n/a    |
| PDHm     | pyruvate dehydrogenase                                     | 8050.1   | -0.128 |
| PDHm     | pyruvate dehydrogenase                                     | 1738.1   | -0.051 |
| PDHm     | pyruvate dehydrogenase                                     | 5160.1   | -0.042 |
| PDHm     | pyruvate dehydrogenase                                     | 1737.1   | n/a    |
| PDHm     | pyruvate dehydrogenase                                     | 5161.1   | n/a    |
| PDHm     | pyruvate dehydrogenase                                     | 5162.1   | n/a    |
| PEPCK    | Phosphoenolpyruvate carboxykinase (GTP)                    | 5105.1   | 0.567  |
| PEPCKm   | Phosphoenolpyruvate carboxykinase (GTP)                    | 5106.1   | n/a    |

| Reaction | Putative function             | Locus    | Ratio |
|----------|-------------------------------|----------|-------|
| PFK      | phosphofructokinase           | 5211.1   | 0.163 |
| PFK      | phosphofructokinase           | 5213.1   | n/a   |
| PFK      | phosphofructokinase           | 5211.2   | n/a   |
| PFK      | phosphofructokinase           | 5214.1   | n/a   |
| PGI      | glucose-6-phosphate isomerase | 2821.1   | n/a   |
| PGK      | phosphoglycerate kinase       | 5230.1   | 0.099 |
| PGK      | phosphoglycerate kinase       | 348477.1 | n/a   |
| PGK      | phosphoglycerate kinase       | 5232.1   | n/a   |
| PGM      | phosphoglycerate mutase       | 5223.1   | 0.125 |
| PGM      | phosphoglycerate mutase       | 5224.1   | n/a   |
| PGM      | phosphoglycerate mutase       | 669.2    | n/a   |
| PGM      | phosphoglycerate mutase       | 5224.2   | n/a   |
| PGM      | phosphoglycerate mutase       | 669.1    | n/a   |
| PGMT     | phosphoglucomutase            | 55276.1  | n/a   |
| PGMT     | phosphoglucomutase            | 5236.1   | n/a   |
| PYK      | pyruvate kinase               | 5315.1   | 0.481 |
| PYK      | pyruvate kinase               | 5315.2   | n/a   |
| PYK      | pyruvate kinase               | 5313.2   | n/a   |
| PYK      | pyruvate kinase               | 5315.3   | n/a   |
| PYK      | pyruvate kinase               | 5313.1   | n/a   |
| PYK      | pyruvate kinase               | 113452.1 | n/a   |
| TPI      | triose-phosphate isomerase    | 286016.1 | n/a   |
| TPI      | triose-phosphate isomerase    | 7167.1   | n/a   |
