# Supplementary material
Source: PubMed Central journal article supplement (PMC1794290)
Supplement: pnas_0610772104_17.pdf [file pnas_0610772104_17.pdf]

**Table 12: Expression changes in pentose phosphate pathway for the gastric bypass study.**

Alphabetized list of reactions in pentose phosphate pathway (as defined by Recon 1). Ratio is the average log<sub>10</sub> expression ratio ( $n=3$ ) of post-/pregene expression measurements (see text for details). Negative ratios (green) indicate a decrease in expression postsurgery, whereas positive ratios indicate an increase (red). Values denoted with “n/a” indicate that gene expression values were unavailable, or that expression ratios conflicted at the probe or patient levels.

| Reaction  | Putative function                                        | Locus    | Ratio  |
|-----------|----------------------------------------------------------|----------|--------|
| DRBK      | Deoxyribokinase                                          | 64080.1  | -0.137 |
| G6PDH1er  | glucose-6-phosphate dehydrogenase, endoplasmic reticulum | 9563.1   | n/a    |
| G6PDH1rer | glucose-6-phosphate dehydrogenase, endoplasmic reticulum | 9563.1   | n/a    |
| G6PDH2r   | glucose 6-phosphate dehydrogenase                        | 2539.1   | -0.094 |
| G6PDH2rer | glucose 6-phosphate dehydrogenase, endoplasmic reticulum | 9563.1   | n/a    |
| GND       | phosphogluconate dehydrogenase                           | 5226.1   | n/a    |
| PGL       | 6-phosphogluconolactonase                                | 25796.1  | -0.19  |
| PGLer     | 6-phosphogluconolactonase, endoplasmic reticulum         | 9563.1   | n/a    |
| PPM       | phosphopentomutase                                       | 5236.1   | n/a    |
| PRPPS     | phosphoribosylpyrophosphate synthetase                   | 5631.1   | n/a    |
| PRPPS     | phosphoribosylpyrophosphate synthetase                   | 221823.1 | n/a    |
| PRPPS     | phosphoribosylpyrophosphate synthetase                   | 5634.1   | n/a    |
| PRPPS     | phosphoribosylpyrophosphate synthetase                   | 221823.2 | n/a    |
| RBK       | ribokinase                                               | 64080.1  | -0.137 |
| RPE       | ribulose 5-phosphate 3-epimerase                         | 6120.1   | n/a    |
| RPE       | ribulose 5-phosphate 3-epimerase                         | 6120.2   | n/a    |
| RPI       | ribose-5-phosphate isomerase                             | 22934.1  | n/a    |
| TALA      | transaldolase                                            | 6888.1   | n/a    |
| TKT1      | transketolase                                            | 8277.1   | -0.063 |
| TKT1      | transketolase                                            | 84076.1  | n/a    |
| TKT1      | transketolase                                            | 7086.1   | n/a    |
| TKT2      | transketolase                                            | 8277.1   | -0.063 |
| TKT2      | transketolase                                            | 84076.1  | n/a    |
| TKT2      | transketolase                                            | 7086.1   | n/a    |
