# Supplementary material
Source: PubMed Central journal article supplement (PMC1794290)
Supplement: pnas_0610772104_18.pdf [file pnas_0610772104_18.pdf]

**Table 13: Expression changes in pyruvate metabolism for the gastric bypass study.**

Alphabetized list of reactions in pyruvate metabolism (as defined by Recon 1). Ratio is the average log<sub>10</sub> expression ratio ( $n=3$ ) of post-/pregene expression measurements (see text for details). Negative ratios (green) indicate a decrease in expression postsurgery, whereas positive ratios indicate an increase (red). Values denoted with “n/a” indicate that gene expression values were unavailable, or that expression ratios conflicted at the probe or patient levels.

| Reaction | Putative function                         | Locus    | Ratio  |
|----------|-------------------------------------------|----------|--------|
| ACOAHi   | acetyl-CoA hydrolase                      | 134526.1 | n/a    |
| ACTLMO   | acetol monooxygenase                      | 1571.1   | -0.258 |
| ACTNMO   | acetone monooxygenase                     | 1571.1   | -0.258 |
| ALCD21_D | alcohol dehydrogenase (D-1,2-propanediol) | 125.1    | 0.233  |
| ALCD21_D | alcohol dehydrogenase (D-1,2-propanediol) | 124.1    | 0.233  |
| ALCD21_D | alcohol dehydrogenase (D-1,2-propanediol) | 126.1    | 0.233  |
| ALCD21_D | alcohol dehydrogenase (D-1,2-propanediol) | 130.1    | 0.32   |
| ALCD21_D | alcohol dehydrogenase (D-1,2-propanediol) | 131.1    | n/a    |
| ALCD21_D | alcohol dehydrogenase (D-1,2-propanediol) | 137872.1 | n/a    |
| ALCD21_D | alcohol dehydrogenase (D-1,2-propanediol) | 127.1    | n/a    |
| ALCD21_D | alcohol dehydrogenase (D-1,2-propanediol) | 284273.2 | n/a    |
| ALCD21_D | alcohol dehydrogenase (D-1,2-propanediol) | 284273.1 | n/a    |
| ALCD21_D | alcohol dehydrogenase (D-1,2-propanediol) | 128.1    | n/a    |
| ALCD21_L | alcohol dehydrogenase (L-1,2-propanediol) | 125.1    | 0.233  |
| ALCD21_L | alcohol dehydrogenase (L-1,2-propanediol) | 124.1    | 0.233  |
| ALCD21_L | alcohol dehydrogenase (L-1,2-propanediol) | 126.1    | 0.233  |
| ALCD21_L | alcohol dehydrogenase (L-1,2-propanediol) | 130.1    | 0.32   |
| ALCD21_L | alcohol dehydrogenase (L-1,2-propanediol) | 131.1    | n/a    |
| ALCD21_L | alcohol dehydrogenase (L-1,2-propanediol) | 137872.1 | n/a    |
| ALCD21_L | alcohol dehydrogenase (L-1,2-propanediol) | 127.1    | n/a    |
| ALCD21_L | alcohol dehydrogenase (L-1,2-propanediol) | 284273.2 | n/a    |
| ALCD21_L | alcohol dehydrogenase (L-1,2-propanediol) | 284273.1 | n/a    |
| ALCD21_L | alcohol dehydrogenase (L-1,2-propanediol) | 128.1    | n/a    |
| ALCD22_D | alcohol dehydrogenase (D-lactaldehyde)    | 125.1    | 0.233  |
| ALCD22_D | alcohol dehydrogenase (D-lactaldehyde)    | 124.1    | 0.233  |

| Reaction | Putative function                      | Locus    | Ratio |
|----------|----------------------------------------|----------|-------|
| ALCD22_D | alcohol dehydrogenase (D-lactaldehyde) | 126.1    | 0.233 |
| ALCD22_D | alcohol dehydrogenase (D-lactaldehyde) | 130.1    | 0.32  |
| ALCD22_D | alcohol dehydrogenase (D-lactaldehyde) | 131.1    | n/a   |
| ALCD22_D | alcohol dehydrogenase (D-lactaldehyde) | 137872.1 | n/a   |
| ALCD22_D | alcohol dehydrogenase (D-lactaldehyde) | 127.1    | n/a   |
| ALCD22_D | alcohol dehydrogenase (D-lactaldehyde) | 284273.2 | n/a   |
| ALCD22_D | alcohol dehydrogenase (D-lactaldehyde) | 284273.1 | n/a   |
| ALCD22_D | alcohol dehydrogenase (D-lactaldehyde) | 128.1    | n/a   |
| ALCD22_L | alcohol dehydrogenase (L-lactaldehyde) | 125.1    | 0.233 |
| ALCD22_L | alcohol dehydrogenase (L-lactaldehyde) | 124.1    | 0.233 |
| ALCD22_L | alcohol dehydrogenase (L-lactaldehyde) | 126.1    | 0.233 |
| ALCD22_L | alcohol dehydrogenase (L-lactaldehyde) | 130.1    | 0.32  |
| ALCD22_L | alcohol dehydrogenase (L-lactaldehyde) | 131.1    | n/a   |
| ALCD22_L | alcohol dehydrogenase (L-lactaldehyde) | 137872.1 | n/a   |
| ALCD22_L | alcohol dehydrogenase (L-lactaldehyde) | 127.1    | n/a   |
| ALCD22_L | alcohol dehydrogenase (L-lactaldehyde) | 284273.2 | n/a   |
| ALCD22_L | alcohol dehydrogenase (L-lactaldehyde) | 284273.1 | n/a   |
| ALCD22_L | alcohol dehydrogenase (L-lactaldehyde) | 128.1    | n/a   |
| ALR2     | aldose reductase (methylglyoxal)       | 10327.1  | 0.066 |
| ALR2     | aldose reductase (methylglyoxal)       | 231.1    | n/a   |
| ALR2     | aldose reductase (methylglyoxal)       | 10327.2  | n/a   |
| ALR2     | aldose reductase (methylglyoxal)       | 8574.1   | n/a   |
| ALR3     | aldose reductase (acetol)              | 10327.1  | 0.066 |
| ALR3     | aldose reductase (acetol)              | 231.1    | n/a   |
| ALR3     | aldose reductase (acetol)              | 10327.2  | n/a   |
| ALR3     | aldose reductase (acetol)              | 8574.1   | n/a   |

| Reaction | Putative function                                            | Locus   | Ratio  |
|----------|--------------------------------------------------------------|---------|--------|
| GLYOX    | hydroxyacylglutathione hydrolase                             | 84264.1 | n/a    |
| GLYOX    | hydroxyacylglutathione hydrolase                             | 84264.2 | n/a    |
| GLYOX    | hydroxyacylglutathione hydrolase                             | 3029.1  | n/a    |
| GLYOXm   | hydroxyacylglutathione hydrolase, mitochondrial              | 3029.1  | n/a    |
| LALDD    | D-lactaldehyde dehydrogenase                                 | 9380.1  | n/a    |
| LALDO    | D-Lactaldehyde:NAD+ oxidoreductase (glutathione-formylating) | 128.1   | n/a    |
| LALDO2   | D-Lactaldehyde:NADP+ 1-oxidoreductase                        | 10327.1 | 0.066  |
| LALDO2   | D-Lactaldehyde:NADP+ 1-oxidoreductase                        | 231.1   | n/a    |
| LALDO2   | D-Lactaldehyde:NADP+ 1-oxidoreductase                        | 10327.2 | n/a    |
| LALDO2   | D-Lactaldehyde:NADP+ 1-oxidoreductase                        | 8574.1  | n/a    |
| LALDO2x  | D-Lactaldehyde:NAD+ 1-oxidoreductase                         | 8574.1  | n/a    |
| LCADi    | lactaldehyde dehydrogenase                                   | 218.1   | -0.247 |
| LCADi    | lactaldehyde dehydrogenase                                   | 8854.1  | 0.273  |
| LCADi    | lactaldehyde dehydrogenase                                   | 222.1   | 0.284  |
| LCADi    | lactaldehyde dehydrogenase                                   | 501.1   | n/a    |
| LCADi    | lactaldehyde dehydrogenase                                   | 216.1   | n/a    |
| LCADi    | lactaldehyde dehydrogenase                                   | 8854.3  | n/a    |
| LCADi    | lactaldehyde dehydrogenase                                   | 8854.2  | n/a    |
| LCADi    | lactaldehyde dehydrogenase                                   | 224.1   | n/a    |
| LCADi    | lactaldehyde dehydrogenase                                   | 223.1   | n/a    |
| LCADi    | lactaldehyde dehydrogenase                                   | 220.1   | n/a    |
| LCADi    | lactaldehyde dehydrogenase                                   | 221.1   | n/a    |
| LCADi_D  | lactaldehyde dehydrogenase                                   | 218.1   | -0.247 |
| LCADi_D  | lactaldehyde dehydrogenase                                   | 8854.1  | 0.273  |
| LCADi_D  | lactaldehyde dehydrogenase                                   | 222.1   | 0.284  |
| LCADi_D  | lactaldehyde dehydrogenase                                   | 501.1   | n/a    |
| LCADi_D  | lactaldehyde dehydrogenase                                   | 216.1   | n/a    |
| LCADi_D  | lactaldehyde dehydrogenase                                   | 8854.3  | n/a    |
| LCADi_D  | lactaldehyde dehydrogenase                                   | 8854.2  | n/a    |
| LCADi_D  | lactaldehyde dehydrogenase                                   | 224.1   | n/a    |
| LCADi_D  | lactaldehyde dehydrogenase                                   | 223.1   | n/a    |
| LCADi_D  | lactaldehyde dehydrogenase                                   | 220.1   | n/a    |
| LCADi_D  | lactaldehyde dehydrogenase                                   | 221.1   | n/a    |
| LCADi_Dm | lactaldehyde dehydrogenase, mitochondrial                    | 219.1   | -0.469 |

| Reaction | Putative function                                | Locus    | Ratio  |
|----------|--------------------------------------------------|----------|--------|
| LCADi_Dm | lactaldehyde dehydrogenase, mitochondrial        | 8659.1   | -0.337 |
| LCADi_Dm | lactaldehyde dehydrogenase, mitochondrial        | 4329.1   | -0.084 |
| LCADi_Dm | lactaldehyde dehydrogenase, mitochondrial        | 217.1    | -0.039 |
| LCADi_Dm | lactaldehyde dehydrogenase, mitochondrial        | 5832.1   | n/a    |
| LCADi_Dm | lactaldehyde dehydrogenase, mitochondrial        | 8659.2   | n/a    |
| LCADi_Dm | lactaldehyde dehydrogenase, mitochondrial        | 7915.1   | n/a    |
| LCADi_Dm | lactaldehyde dehydrogenase, mitochondrial        | 7915.2   | n/a    |
| LCADim   | lactaldehyde dehydrogenase, mitochondrial        | 219.1    | -0.469 |
| LCADim   | lactaldehyde dehydrogenase, mitochondrial        | 8659.1   | -0.337 |
| LCADim   | lactaldehyde dehydrogenase, mitochondrial        | 4329.1   | -0.084 |
| LCADim   | lactaldehyde dehydrogenase, mitochondrial        | 217.1    | -0.039 |
| LCADim   | lactaldehyde dehydrogenase, mitochondrial        | 5832.1   | n/a    |
| LCADim   | lactaldehyde dehydrogenase, mitochondrial        | 8659.2   | n/a    |
| LCADim   | lactaldehyde dehydrogenase, mitochondrial        | 7915.1   | n/a    |
| LCADim   | lactaldehyde dehydrogenase, mitochondrial        | 7915.2   | n/a    |
| LDH_D    | D-lactate dehydrogenase                          | 197257.1 | n/a    |
| LDH_D    | D-lactate dehydrogenase                          | 197257.2 | n/a    |
| LDH_Lm   | L-lactate dehydrogenase                          | 3939.1   | n/a    |
| LGTHL    | lactoylglutathione lyase                         | 2739.1   | n/a    |
| L-LACDcm | L-Lactate dehydrogenase, cytosolic/mitochondrial | 124637.1 | n/a    |
| ME1m     | malic enzyme (NAD), mitochondrial                | 4200.1   | n/a    |
| ME2      | malic enzyme (NADP)                              | 4199.1   | -0.208 |
| ME2m     | malic enzyme (NADP), mitochondrial               | 10873.1  | n/a    |
| ME2m     | malic enzyme (NADP), mitochondrial               | 4200.1   | n/a    |
| PCm      | pyruvate carboxylase                             | 5091.1   | n/a    |
| PCm      | pyruvate carboxylase                             | 5091.2   | n/a    |
| PPDOx    | Propane-1,2-diol:NAD+ 1-oxidoreductase           | 8574.1   | n/a    |

| Reaction | Putative function                       | Locus   | Ratio |
|----------|-----------------------------------------|---------|-------|
| PPDOy    | Propane-1,2-diol:NADP+ 1-oxidoreductase | 10327.1 | 0.066 |
| PPDOy    | Propane-1,2-diol:NADP+ 1-oxidoreductase | 231.1   | n/a   |
| PPDOy    | Propane-1,2-diol:NADP+ 1-oxidoreductase | 10327.2 | n/a   |
| PPDOy    | Propane-1,2-diol:NADP+ 1-oxidoreductase | 8574.1  | n/a   |
