# Supplementary material
Source: PubMed Central journal article supplement (PMC1794290)
Supplement: pnas_0610772104_19.pdf [file pnas_0610772104_19.pdf]

**Table 14: Expression changes in TCA cycle for the gastric bypass study.** Alphabetized list of reactions in TCA cycle (as defined by Recon 1). Ratio is the average log<sub>10</sub> expression ratio ( $n=3$ ) of post-/pregene expression measurements (see text for details). Negative ratios (green) indicate a decrease in expression postsurgery whereas positive ratios indicate an increase (red). Values denoted with “n/a” indicate that gene expression values were unavailable, or that expression ratios conflicted at the probe or patient levels.

| Reaction | Putative function                   | Locus    | Ratio  |
|----------|-------------------------------------|----------|--------|
| ACITL    | ATP-Citrate lyase                   | 47.1     | 0.254  |
| ACITL    | ATP-Citrate lyase                   | 47.2     | n/a    |
| ACONT    | aconitase                           | 48.1     | -0.075 |
| ACONT    | aconitase                           | 3658.1   | -0.065 |
| ACONTm   | Aconitate hydratase                 | 50.1     | -0.06  |
| AKGDm    | 2-oxoglutarate dehydrogenase        | 8050.1   | -0.128 |
| AKGDm    | 2-oxoglutarate dehydrogenase        | 1738.1   | -0.051 |
| AKGDm    | 2-oxoglutarate dehydrogenase        | 4967.2   | n/a    |
| AKGDm    | 2-oxoglutarate dehydrogenase        | 1743.1   | n/a    |
| AKGDm    | 2-oxoglutarate dehydrogenase        | 4967.1   | n/a    |
| CITL     | Citrate lyase                       | 171425.1 | n/a    |
| CITL     | Citrate lyase                       | 171425.2 | n/a    |
| CSm      | citrate synthase                    | 1431.1   | n/a    |
| CSm      | citrate synthase                    | 1431.2   | n/a    |
| FUM      | fumarase                            | 2271.1   | n/a    |
| FUMm     | fumarase, mitochondrial             | 2271.1   | n/a    |
| ICDHxm   | Isocitrate dehydrogenase (NAD+)     | 3421.1   | n/a    |
| ICDHxm   | Isocitrate dehydrogenase (NAD+)     | 3421.2   | n/a    |
| ICDHxm   | Isocitrate dehydrogenase (NAD+)     | 3419.1   | n/a    |
| ICDHxm   | Isocitrate dehydrogenase (NAD+)     | 3420.3   | n/a    |
| ICDHxm   | Isocitrate dehydrogenase (NAD+)     | 3420.1   | n/a    |
| ICDHxm   | Isocitrate dehydrogenase (NAD+)     | 3420.2   | n/a    |
| ICDHx    | isocitrate dehydrogenase (NADP)     | 3417.1   | -0.118 |
| ICDHyp   | Isocitrate dehydrogenase (NADP+)    | 3417.1   | -0.118 |
| ICDHxym  | Isocitrate dehydrogenase (NADP+)    | 3418.1   | n/a    |
| MDH      | malate dehydrogenase                | 4190.1   | -0.059 |
| MDH      | malate dehydrogenase                | 130752.1 | n/a    |
| MDHm     | malate dehydrogenase, mitochondrial | 4191.1   | n/a    |
| SUCD1m   | succinate dehydrogenase             | 6392.1   | -0.252 |
| SUCD1m   | succinate dehydrogenase             | 6391.1   | -0.069 |
| SUCD1m   | succinate dehydrogenase             | 6390.1   | n/a    |
| SUCD1m   | succinate dehydrogenase             | 6389.1   | n/a    |
| SUCOAS1m | Succinate--CoA ligase (GDP-forming) | 8802.1   | -0.058 |
| SUCOAS1m | Succinate--CoA ligase (GDP-forming) | 8801.1   | 0.028  |
| SUCOASm  | Succinate--CoA ligase (ADP-forming) | 8802.1   | -0.058 |
| SUCOASm  | Succinate--CoA ligase (ADP-forming) | 8803.1   | n/a    |
