# Supplementary material
Source: PubMed Central journal article supplement (PMC1794290)
Supplement: pnas_0610772104_20.pdf [file pnas_0610772104_20.pdf]

**Table 15: Expression changes in oxidative phosphorylation for the gastric bypass study.**

Alphabetized list of reactions in oxidative phosphorylation (as defined by Recon 1). Ratio is the average log<sub>10</sub> expression ratio ( $n=3$ ) of post-/pregene expression measurements (see text for details). Negative ratios (green) indicate a decrease in expression postsurgery, whereas positive ratios indicate an increase (red). Values denoted with “n/a” indicate that gene expression values were unavailable, or that expression ratios conflicted at the probe or patient levels.

| Reaction | Putative function                              | Locus   | Ratio  |
|----------|------------------------------------------------|---------|--------|
| ATPS4m   | ATP synthase (four protons for one ATP)        | 517.1   | -0.111 |
| ATPS4m   | ATP synthase (four protons for one ATP)        | 514.1   | -0.104 |
| ATPS4m   | ATP synthase (four protons for one ATP)        | 518.1   | -0.102 |
| ATPS4m   | ATP synthase (four protons for one ATP)        | 522.1   | -0.093 |
| ATPS4m   | ATP synthase (four protons for one ATP)        | 4905.1  | -0.08  |
| ATPS4m   | ATP synthase (four protons for one ATP)        | 516.1   | -0.057 |
| ATPS4m   | ATP synthase (four protons for one ATP)        | 521.1   | -0.042 |
| ATPS4m   | ATP synthase (four protons for one ATP)        | 509.1   | -0.04  |
| ATPS4m   | ATP synthase (four protons for one ATP)        | 10632.1 | 0.201  |
| ATPS4m   | ATP synthase (four protons for one ATP)        | 513.1   | n/a    |
| ATPS4m   | ATP synthase (four protons for one ATP)        | 515.3   | n/a    |
| ATPS4m   | ATP synthase (four protons for one ATP)        | 513.2   | n/a    |
| ATPS4m   | ATP synthase (four protons for one ATP)        | 9551.1  | n/a    |
| ATPS4m   | ATP synthase (four protons for one ATP)        | 522.5   | n/a    |
| ATPS4m   | ATP synthase (four protons for one ATP)        | 522.4   | n/a    |
| ATPS4m   | ATP synthase (four protons for one ATP)        | 506.1   | n/a    |
| ATPS4m   | ATP synthase (four protons for one ATP)        | 515.2   | n/a    |
| ATPS4m   | ATP synthase (four protons for one ATP)        | 509.2   | n/a    |
| ATPS4m   | ATP synthase (four protons for one ATP)        | 522.2   | n/a    |
| ATPS4m   | ATP synthase (four protons for one ATP)        | 518.2   | n/a    |
| ATPS4m   | ATP synthase (four protons for one ATP)        | 514.2   | n/a    |
| ATPS4m   | ATP synthase (four protons for one ATP)        | 522.3   | n/a    |
| ATPS4m   | ATP synthase (four protons for one ATP)        | 517.2   | n/a    |
| ATPS4m   | ATP synthase (four protons for one ATP)        | 518.3   | n/a    |
| ATPS4m   | ATP synthase (four protons for one ATP)        | 10476.2 | n/a    |
| ATPS4m   | ATP synthase (four protons for one ATP)        | 9551.3  | n/a    |
| ATPS4m   | ATP synthase (four protons for one ATP)        | 515.1   | n/a    |
| ATPS4m   | ATP synthase (four protons for one ATP)        | 498.1   | n/a    |
| ATPS4m   | ATP synthase (four protons for one ATP)        | 10476.1 | n/a    |
| ATPS4m   | ATP synthase (four protons for one ATP)        | 498.2   | n/a    |
| ATPS4m   | ATP synthase (four protons for one ATP)        | 516.2   | n/a    |
| ATPS4m   | ATP synthase (four protons for one ATP)        | 498.3   | n/a    |
| ATPS4m   | ATP synthase (four protons for one ATP)        | 9551.2  | n/a    |
| CYOOm3   | cytochrome c oxidase, mitochondrial Complex IV | 1329.1  | -0.218 |
| CYOOm3   | cytochrome c oxidase, mitochondrial Complex IV | 1339.1  | -0.193 |
| CYOOm3   | cytochrome c oxidase, mitochondrial Complex IV | 1349.1  | -0.073 |
| CYOOm3   | cytochrome c oxidase, mitochondrial Complex IV | 1327.1  | -0.03  |
| CYOOm3   | cytochrome c oxidase, mitochondrial Complex IV | 9167.1  | 0.045  |
| CYOOm3   | cytochrome c oxidase, mitochondrial Complex IV | 1347.1  | n/a    |
| CYOOm3   | cytochrome c oxidase, mitochondrial Complex IV | 1345.1  | n/a    |

| Reaction  | Putative function                               | Locus    | Ratio  |
|-----------|-------------------------------------------------|----------|--------|
| CYOOm3    | cytochrome c oxidase, mitochondrial Complex IV  | 4512.1   | n/a    |
| CYOOm3    | cytochrome c oxidase, mitochondrial Complex IV  | 1340.1   | n/a    |
| CYOOm3    | cytochrome c oxidase, mitochondrial Complex IV  | 4514.1   | n/a    |
| CYOOm3    | cytochrome c oxidase, mitochondrial Complex IV  | 84701.1  | n/a    |
| CYOOm3    | cytochrome c oxidase, mitochondrial Complex IV  | 1346.1   | n/a    |
| CYOOm3    | cytochrome c oxidase, mitochondrial Complex IV  | 1350.1   | n/a    |
| CYOOm3    | cytochrome c oxidase, mitochondrial Complex IV  | 1337.1   | n/a    |
| CYOOm3    | cytochrome c oxidase, mitochondrial Complex IV  | 170712.1 | n/a    |
| CYOOm3    | cytochrome c oxidase, mitochondrial Complex IV  | 1351.1   | n/a    |
| CYOOm3    | cytochrome c oxidase, mitochondrial Complex IV  | 4513.1   | n/a    |
| CYOOm3    | cytochrome c oxidase, mitochondrial Complex IV  | 341947.1 | n/a    |
| CYOOm3    | cytochrome c oxidase, mitochondrial Complex IV  | 125965.1 | n/a    |
| CYOOm3    | cytochrome c oxidase, mitochondrial Complex IV  | 9377.1   | n/a    |
| CYOR-u10m | ubiquinol-6 cytochrome c reductase, Complex III | 7381.1   | -0.242 |
| CYOR-u10m | ubiquinol-6 cytochrome c reductase, Complex III | 29796.1  | -0.102 |
| CYOR-u10m | ubiquinol-6 cytochrome c reductase, Complex III | 10975.1  | n/a    |
| CYOR-u10m | ubiquinol-6 cytochrome c reductase, Complex III | 7388.1   | n/a    |
| CYOR-u10m | ubiquinol-6 cytochrome c reductase, Complex III | 1537.1   | n/a    |
| CYOR-u10m | ubiquinol-6 cytochrome c reductase, Complex III | 4519.1   | n/a    |
| CYOR-u10m | ubiquinol-6 cytochrome c reductase, Complex III | 29796.2  | n/a    |
| CYOR-u10m | ubiquinol-6 cytochrome c reductase, Complex III | 7384.1   | n/a    |
| CYOR-u10m | ubiquinol-6 cytochrome c reductase, Complex III | 7385.1   | n/a    |
| CYOR-u10m | ubiquinol-6 cytochrome c reductase, Complex III | 27089.1  | n/a    |
| CYOR-u10m | ubiquinol-6 cytochrome c reductase, Complex III | 7386.1   | n/a    |

| Reaction   | Putative function                 | Locus    | Ratio  |
|------------|-----------------------------------|----------|--------|
| NADH2-u10m | NADH dehydrogenase, mitochondrial | 4728.1   | -0.219 |
| NADH2-u10m | NADH dehydrogenase, mitochondrial | 51079.1  | -0.176 |
| NADH2-u10m | NADH dehydrogenase, mitochondrial | 7991.1   | -0.133 |
| NADH2-u10m | NADH dehydrogenase, mitochondrial | 4729.1   | -0.129 |
| NADH2-u10m | NADH dehydrogenase, mitochondrial | 4696.1   | -0.101 |
| NADH2-u10m | NADH dehydrogenase, mitochondrial | 4694.1   | -0.101 |
| NADH2-u10m | NADH dehydrogenase, mitochondrial | 4717.1   | -0.091 |
| NADH2-u10m | NADH dehydrogenase, mitochondrial | 4719.1   | -0.087 |
| NADH2-u10m | NADH dehydrogenase, mitochondrial | 4718.1   | -0.086 |
| NADH2-u10m | NADH dehydrogenase, mitochondrial | 4709.1   | -0.076 |
| NADH2-u10m | NADH dehydrogenase, mitochondrial | 4708.1   | -0.073 |
| NADH2-u10m | NADH dehydrogenase, mitochondrial | 4702.1   | -0.064 |
| NADH2-u10m | NADH dehydrogenase, mitochondrial | 4714.1   | -0.055 |
| NADH2-u10m | NADH dehydrogenase, mitochondrial | 4711.1   | -0.053 |
| NADH2-u10m | NADH dehydrogenase, mitochondrial | 4713.1   | 0.118  |
| NADH2-u10m | NADH dehydrogenase, mitochondrial | 7991.2   | n/a    |
| NADH2-u10m | NADH dehydrogenase, mitochondrial | 4712.1   | n/a    |
| NADH2-u10m | NADH dehydrogenase, mitochondrial | 4697.1   | n/a    |
| NADH2-u10m | NADH dehydrogenase, mitochondrial | 4695.1   | n/a    |
| NADH2-u10m | NADH dehydrogenase, mitochondrial | 4725.1   | n/a    |
| NADH2-u10m | NADH dehydrogenase, mitochondrial | 4716.1   | n/a    |
| NADH2-u10m | NADH dehydrogenase, mitochondrial | 4698.1   | n/a    |
| NADH2-u10m | NADH dehydrogenase, mitochondrial | 4720.1   | n/a    |
| NADH2-u10m | NADH dehydrogenase, mitochondrial | 4538.1   | n/a    |
| NADH2-u10m | NADH dehydrogenase, mitochondrial | 126328.1 | n/a    |
| NADH2-u10m | NADH dehydrogenase, mitochondrial | 4710.1   | n/a    |
| NADH2-u10m | NADH dehydrogenase, mitochondrial | 4539.1   | n/a    |
| NADH2-u10m | NADH dehydrogenase, mitochondrial | 4535.1   | n/a    |
| NADH2-u10m | NADH dehydrogenase, mitochondrial | 4704.1   | n/a    |
| NADH2-u10m | NADH dehydrogenase, mitochondrial | 4701.1   | n/a    |
| NADH2-u10m | NADH dehydrogenase, mitochondrial | 4724.1   | n/a    |
| NADH2-u10m | NADH dehydrogenase, mitochondrial | 4541.1   | n/a    |
| NADH2-u10m | NADH dehydrogenase, mitochondrial | 4722.1   | n/a    |
| NADH2-u10m | NADH dehydrogenase, mitochondrial | 4700.1   | n/a    |
| NADH2-u10m | NADH dehydrogenase, mitochondrial | 4726.1   | n/a    |
| NADH2-u10m | NADH dehydrogenase, mitochondrial | 4723.1   | n/a    |
| NADH2-u10m | NADH dehydrogenase, mitochondrial | 4536.1   | n/a    |
| NADH2-u10m | NADH dehydrogenase, mitochondrial | 4715.1   | n/a    |
| NADH2-u10m | NADH dehydrogenase, mitochondrial | 374291.1 | n/a    |
| NADH2-u10m | NADH dehydrogenase, mitochondrial | 4731.1   | n/a    |
| NADH2-u10m | NADH dehydrogenase, mitochondrial | 55967.1  | n/a    |
| NADH2-u10m | NADH dehydrogenase, mitochondrial | 4537.1   | n/a    |
| NADH2-u10m | NADH dehydrogenase, mitochondrial | 4706.1   | n/a    |
| NADH2-u10m | NADH dehydrogenase, mitochondrial | 4712.2   | n/a    |
| NADH2-u10m | NADH dehydrogenase, mitochondrial | 4707.1   | n/a    |
| NADH2-u10m | NADH dehydrogenase, mitochondrial | 4705.1   | n/a    |
| NADH2-u10m | NADH dehydrogenase, mitochondrial | 4540.1   | n/a    |
| NADH2-u10m | NADH dehydrogenase, mitochondrial | 4731.2   | n/a    |

| Reaction | Putative function       | Locus   | Ratio  |
|----------|-------------------------|---------|--------|
| PPA      | inorganic diphosphatase | 5464.1  | n/a    |
| PPAm     | inorganic diphosphatase | 27068.1 | -0.106 |
| PPAm     | inorganic diphosphatase | 27068.2 | n/a    |
| PPAm     | inorganic diphosphatase | 27068.4 | n/a    |
| PPAm     | inorganic diphosphatase | 27068.3 | n/a    |
